# Supplementary material for: Dynamics of cardiomyocyte transcriptome and chromatin landscape demarcates key events of heart development
Source: HighWire-hosted journal article supplement (doi:10.1101/gr.244491.118), 2019-02-13
Supplement: Supplement_Table_1.xlsx [file Supplement_Table_1.xlsx]

## Sheet: Sheet1
Supplement Table 1. DESeq2 differentially expressed genes (DEG) GFP+ and GFP- cell fractions at 24, 48 and 72 hpf and DEG in GFP+ between developmental stages. Numbers in columns are log2FC and padj corresponding to compared conditions as indicated in table headers.
geneID	ZFIN_ID	RNAseq_24-48_log2FC	RNAseq_24-48_padj	RNAseq_48-72_log2FC	RNAseq_48-72_padj	RNAseq_24_plus_minus_log2FC	RNAseq_24_plus_minus_padj	RNAseq_48_plus_minus_log2FC	RNAseq_48_plus_minus_padj	RNAseq_72_plus_minus_log2FC	RNAseq_72_plus_minus_padj
ENSDARG00000000001	slc35a5	-1.18473	0.556898	-2.99739	0.151761	1.37508	0.773222	-0.974055	#N/A	-3.64012	0.133184
ENSDARG00000000002	ccdc80	-1.54112	0.0389125	0.627285	0.671301	1.7656	0.119589	1.30942	0.251113	-0.587051	0.781198
ENSDARG00000000018	nrf1	-0.0959158	0.950131	0.32539	0.839635	-0.940398	0.420684	-1.23118	0.155479	-0.142791	0.960863
ENSDARG00000000019	ube2h	-0.131712	0.857196	-0.145273	0.906582	1.61662	0.00171781	0.88169	0.121116	0.345519	0.75504
ENSDARG00000000068	slc9a3r1a	-0.168398	0.927818	-0.0983293	0.976381	1.00063	0.622489	0.869455	0.558017	-0.424201	0.90009
ENSDARG00000000069	dap	1.02027	0.121733	0.50211	0.688466	-0.185113	0.970291	-0.170555	0.903883	-0.0329548	0.991248
ENSDARG00000000086	itsn1	0.201821	0.711495	0.102661	0.932369	-0.524556	0.477529	-0.810044	0.108422	-0.0651507	0.969536
ENSDARG00000000103	myh10	0.523589	0.229765	-0.956196	0.0349562	-0.174737	0.951896	0.712782	0.207271	-0.391137	0.675128
ENSDARG00000000142	tmem267	1.13793	0.545453	-8.3643	0.000274328	0.110151	0.987751	-0.553758	#N/A	-7.08871	0.00727051
ENSDARG00000000151	thraa	-0.227012	0.883483	0.341881	0.885224	0.839793	0.706989	1.03333	0.451805	0.129962	0.973338
ENSDARG00000000161	itsn2a	2.84422	0.000485697	0.0508001	0.984264	0.402523	0.95408	1.56542	0.228187	1.70533	0.248618
ENSDARG00000000175	hoxb2a	0.843241	0.463588	0.119839	0.973716	-2.38443	0.0652374	-1.32896	0.343068	-1.32747	0.439205
ENSDARG00000000183	ptpn4b	-1.36495	0.15847	1.07255	0.457644	-0.958701	0.663827	-2.63467	0.0198905	-0.159878	0.969311
ENSDARG00000000189	sema6e	0.974552	0.0882159	0.264406	0.859552	1.09132	0.236813	0.158417	0.900093	0.297058	0.884717
ENSDARG00000000212	krt97	3.38	0.0379037	1.90916	0.457711	-5.83992	0.00422032	-1.77776	0.50531	0.0897017	0.991125
ENSDARG00000000229	usp49	-0.905466	0.235374	0.235458	0.909557	0.010364	0.997339	-1.66339	0.0648121	-0.489001	0.810995
ENSDARG00000000241	slc40a1	0.698147	0.382031	1.2242	0.159333	0.354583	0.927115	1.02918	0.313047	1.90448	0.0403938
ENSDARG00000000324	dcaf8	0.40214	0.658536	-0.263022	0.887503	0.870888	0.52814	-0.365312	0.775532	-0.172166	0.953157
ENSDARG00000000349	cfap300	-0.0199383	#N/A	-0.668713	#N/A	-0.999683	#N/A	-5.04161	#N/A	-1.80521	#N/A
ENSDARG00000000369	prkag3b	2.19829	0.492583	-1.88073	0.724228	-1.88452	0.836618	2.02382	#N/A	-0.224421	0.986076
ENSDARG00000000370	triob	0.00799645	0.999251	-0.0960021	0.948083	-0.990991	0.0942618	-1.31162	0.00860213	-1.05366	0.0709105
ENSDARG00000000380	pde6a	-0.364233	0.979773	3.27318	0.655798	-0.887154	0.970291	-2.41579	#N/A	-0.1994	0.991248
ENSDARG00000000394	matr3l1.1	-0.139181	0.855539	0.0465174	0.977183	-0.498733	0.618618	-0.624775	0.350011	0.0794451	0.967343
ENSDARG00000000423	si:ch73-314g15.3	-0.461597	0.909698	0.235467	0.97603	0.711242	0.970291	1.12271	#N/A	0.21069	0.983784
ENSDARG00000000442	slc39a13	0.502728	0.707495	-0.386255	0.880894	-0.546197	0.904991	0.358468	0.858258	-1.5836	0.312822
ENSDARG00000000460	nitr2b	-0.0199383	#N/A	-0.668713	#N/A	-0.999734	#N/A	-0.599137	#N/A	-7.94815	#N/A
ENSDARG00000000472	cntn2	0.969553	0.427347	-1.29312	0.398317	-0.6423	0.884865	-1.78678	0.214213	-1.64633	0.353507
ENSDARG00000000476	pms1	-0.598014	0.766816	0.635635	0.854977	-0.680367	0.927148	0.514138	0.857214	-1.10755	0.742048
ENSDARG00000000489	upf3b	1.13552	0.0806688	0.56647	0.632972	-0.33029	0.931319	0.551419	0.62669	1.20624	0.251429
ENSDARG00000000503	stx1b	7.3841	2.71211e-22	0.24737	0.867415	-7.61402	2.36642e-18	-2.76341	2.88831e-06	-0.152249	0.949392
ENSDARG00000000516	ankar	4.82162	#N/A	-5.51027	#N/A	-0.999686	#N/A	-2.28748	#N/A	-1.80522	#N/A
ENSDARG00000000529	ofd1	-1.69054	0.0711359	0.76989	0.668847	0.985596	0.663195	-0.569797	0.750138	0.462635	0.897951
ENSDARG00000000540	asnsd1	-0.784192	0.459167	0.482753	0.824119	0.177221	0.970598	-0.241211	0.901333	0.0577456	0.989338
ENSDARG00000000540	asdurf	-0.784192	0.459167	0.482753	0.824119	0.177221	0.970598	-0.241211	0.901333	0.0577456	0.989338
ENSDARG00000000542	gtf2e1	-0.39737	0.61326	0.542072	0.607373	0.0785074	0.978641	0.266225	0.82749	0.535836	0.715936
ENSDARG00000000551	slc1a4	-0.6807	0.332423	0.720733	0.451091	-0.514282	0.783548	-2.08324	0.00380037	-1.4411	0.101452
ENSDARG00000000563	ttn.1	2.13363	0.00113296	0.482829	0.763119	-0.456475	0.884854	1.97517	0.0304549	2.18333	0.0226182
ENSDARG00000000567	znf281a	0.444859	0.534112	-0.802941	0.314896	-2.06151	0.00264734	-1.56562	0.0257997	-1.22388	0.148595
ENSDARG00000000568	ell	-0.296407	0.752981	-0.928456	0.287584	0.0672291	0.982621	0.012501	0.992613	-0.621614	0.674585
ENSDARG00000000588	grasp	-1.22999	0.513323	2.06405	0.337823	-0.231629	0.975534	-0.831611	0.777111	-0.0598782	0.993926
ENSDARG00000000606	dnah6	0.247957	0.965351	1.85625	0.607655	-1.47172	0.836618	-1.50155	0.68221	0.436172	0.961269
ENSDARG00000000631	ptpn4a	1.35463	0.000457903	-0.174618	0.885092	-0.458777	0.663922	0.74388	0.229188	0.645474	0.416334
ENSDARG00000000651	osgepl1	0.698588	0.893765	-7.59918	0.0493423	0.769554	0.970291	6.33135	#N/A	-5.24792	0.371421
ENSDARG00000000656	psmb9a	5.77995	#N/A	1.24548	#N/A	-0.999683	#N/A	5.2008	#N/A	5.90887	#N/A
ENSDARG00000000666	creg2	0.410912	0.798894	-0.2366	0.947752	-0.545624	0.921273	0.848435	0.641161	-0.88051	0.731906
ENSDARG00000000690	sypl2b	2.76172	3.06829e-07	-0.840184	0.361347	0.0767918	0.979679	3.78041	3.17066e-08	2.01777	0.0154546
ENSDARG00000000729	daxx	-1.04473	0.0350939	0.0730994	0.972793	-0.114883	0.970291	-0.940603	0.188834	-0.527301	0.649703
ENSDARG00000000730	slc6a22.1	-1.27555	0.382785	1.19397	0.585365	0.56176	0.947585	-0.358829	0.898218	0.660281	0.884717
ENSDARG00000000747	lcmt2	-0.519055	0.885226	-1.07753	0.826637	1.59668	0.80199	0.291731	#N/A	-1.80866	0.703088
ENSDARG00000000760	znf511	0.10293	0.981149	1.55233	0.339191	1.19348	0.704077	0.18091	0.945662	1.53023	0.494965
ENSDARG00000000767	spi1b	-3.14822	0.000336195	1.76203	0.164168	3.97888	0.000876578	1.16875	0.466635	3.17096	0.0156039
ENSDARG00000000779	scfd1	0.824066	0.0386188	-1.1304	0.00976632	-0.358661	0.771126	0.389681	0.573434	-0.691114	0.330507
ENSDARG00000000796	nr4a1	0.275815	0.88948	1.49966	0.32411	3.11146	0.0293313	1.33258	0.429026	6.35501	2.11061e-07
ENSDARG00000000804	rassf6	0.466231	0.941122	-1.32095	0.856583	0.587392	0.970291	1.05914	#N/A	-1.19156	0.912624
ENSDARG00000000830	telo2	-1.37716	0.0542192	-0.355035	0.85243	0.7363	0.684908	-0.886192	0.44162	-0.0122507	0.997898
ENSDARG00000000837	snx9a	-2.20477	3.29409e-05	0.148369	0.945062	2.98884	2.83278e-05	0.0684883	0.960895	0.200851	0.938151
ENSDARG00000000853	dstyk	1.39134	0.000283208	-0.166678	0.892357	-0.287221	0.869959	1.13426	0.0384207	1.15128	0.0562861
ENSDARG00000000857	mapk14a	-0.0789926	0.981149	-0.398308	0.865583	-0.471848	0.919493	0.00071838	0.999627	-0.0458516	0.991248
ENSDARG00000000861	scrib	0.591915	0.0298986	-0.147955	0.836143	-0.920435	0.0100842	0.336983	0.453999	0.541717	0.234689
ENSDARG00000000887	zgc:56699	0.573224	0.707973	-2.53151	0.037964	0.0268956	0.995412	3.81585	0.00406586	-0.119822	0.981758
ENSDARG00000000906	skap2	1.76462	0.149714	0.522604	0.867415	1.75234	0.479642	1.58388	0.383835	2.44876	0.182906
ENSDARG00000000935	unk	-0.779644	0.745077	0.529649	0.911784	-0.0495208	0.993654	-0.620916	0.856759	0.0463375	0.995997
ENSDARG00000000943	dzip1	-0.87012	0.550756	-0.0836323	0.979662	-0.475304	0.958029	-1.47946	0.403522	-0.44479	0.923545
ENSDARG00000000966	ncor2	0.828344	0.00745154	-0.029155	0.97834	-0.506413	0.405917	-0.0214653	0.978344	-0.0729628	0.961269
ENSDARG00000001014	myh9b	-0.708242	0.046349	-0.27796	0.704016	0.785566	0.146767	0.831081	0.0804175	0.14179	0.923545
ENSDARG00000001015	znf384l	-0.75494	0.246559	-0.0413305	0.980163	0.144891	0.970291	-1.13865	0.163791	-1.04464	0.289298
ENSDARG00000001057	bysl	-1.13124	0.0685773	-0.505012	0.67639	-0.311321	0.93273	0.876704	0.366506	-0.595981	0.689715
ENSDARG00000001127	slc17a6a	2.75087	0.0599711	0.030942	0.994676	-2.50293	0.314657	-3.12702	0.0969278	1.3844	0.692894
ENSDARG00000001129	dicer1	-0.370826	0.326078	-0.302382	0.613127	-0.254732	0.817082	-0.530776	0.270461	-0.716869	0.150711
ENSDARG00000001154	rimbp2	5.2906	0.00996648	-1.00659	0.838906	-5.34081	0.0696511	-1.99466	0.531384	-0.936645	0.900321
ENSDARG00000001162	matr3l1.1	-0.168923	0.844862	-0.0912246	0.965751	-0.431203	0.779618	-0.617993	0.444688	-0.400509	0.771044
ENSDARG00000001169	hsd17b8	-0.578636	0.784398	1.55703	0.463975	2.07388	0.449797	0.215359	#N/A	1.54308	0.60007
ENSDARG00000001210	arl14ep	-0.131856	0.958547	1.3675	0.309779	-0.714964	0.827584	-0.260257	0.90291	1.06938	0.605009
ENSDARG00000001220	mycbp2	1.24781	0.000745603	-1.15532	0.00875597	0.214097	0.926377	1.04887	0.0462551	0.623096	0.403884
ENSDARG00000001234	map4k2	-3.85809	0.021284	2.23203	0.397069	1.63624	0.728287	-1.10086	0.741897	0.423815	0.956667
ENSDARG00000001241	puf60b	-0.623273	0.318535	-0.496213	0.620406	-0.200275	0.970291	-0.428222	0.664974	-0.597623	0.621398
ENSDARG00000001244	srrm1	-0.678803	0.135727	-0.122012	0.929627	-0.334067	0.819995	-0.617246	0.355529	-0.645427	0.419821
ENSDARG00000001249	pcgf1	0.166961	0.949395	-1.36356	0.409065	-0.488655	0.947751	-0.0863568	0.972712	-1.82177	0.330135
ENSDARG00000001259	gas2a	0.128872	0.96041	1.71262	0.154271	1.84121	0.344353	0.275164	0.899987	-0.0971347	0.983213
ENSDARG00000001313	g2e3	-2.68735	3.27223e-06	1.49406	0.0569076	0.519871	0.81294	-1.82809	0.0300264	0.679188	0.66045
ENSDARG00000001354	slc6a22.2	7.54254	0.000185618	0.941278	0.729236	-6.44238	0.0154068	-2.63915	0.13331	-1.30426	0.659365
ENSDARG00000001414	mctp2a	0.8321	0.779379	0.45047	0.946566	2.57632	0.593692	1.50705	#N/A	0.654557	0.934943
ENSDARG00000001431	actn3b	4.62488	6.61236e-05	1.44456	0.479981	-4.76315	0.00292243	0.484858	0.861251	1.56917	0.551125
ENSDARG00000001437	slc2a1a	2.63769	0.299335	-2.64527	0.451201	-3.21608	0.453442	1.28074	0.767864	-1.7415	0.77685
ENSDARG00000001442	inppl1b	3.60851	0.0213917	-0.47636	0.923059	-1.30882	0.80952	0.903108	0.773035	-1.54509	0.683281
ENSDARG00000001447	mier1b	-0.595483	0.468944	0.3218	0.856218	-0.643296	0.716649	-0.781885	0.46862	0.125338	0.966799
ENSDARG00000001452	adam8a	-1.33216	0.0161157	-0.715337	0.42639	2.60111	0.000201367	2.53517	0.000223785	0.85177	0.451272
ENSDARG00000001463	tdh2	0.870831	0.900769	1.30234	0.903401	4.95105	0.599677	-1.62642	#N/A	-1.64469	0.907605
ENSDARG00000001470	mhc1zea	-0.184008	0.890506	-0.229771	0.914866	0.828565	0.614159	0.896603	0.434031	0.23544	0.93842
ENSDARG00000001498	skap1	-8.35813	0.0711058	-0.668722	0.97309	3.31086	#N/A	-7.04173	#N/A	-7.70732	0.312403
ENSDARG00000001549	sp3a	-0.869433	0.0523924	-0.070242	0.970927	0.0986514	0.970291	-0.47105	0.531384	-0.569579	0.536241
ENSDARG00000001557	tomm34	-0.187979	0.903129	-0.443619	0.825556	0.373644	0.945567	0.863605	0.517328	0.653733	0.76539
ENSDARG00000001558	kifc1	-2.72126	7.77271e-11	1.27549	0.0221363	-0.130677	0.970291	-2.0116	0.000392787	-0.0628116	0.979019
ENSDARG00000001559	csmd2	1.693	0.0104877	-0.408336	0.801115	-0.378361	0.929855	-2.35227	0.00315246	-0.570471	0.754134
ENSDARG00000001572	prf1.3	-0.0199383	#N/A	-0.668713	#N/A	-0.999683	#N/A	-0.599086	#N/A	-1.80521	#N/A
ENSDARG00000001578	echs1	1.23826	0.0447328	0.134321	0.954225	0.348992	0.919568	1.76964	0.0274548	0.781567	0.544433
ENSDARG00000001621	nfyal	0.462963	0.820748	-0.248666	0.960172	-0.545997	0.952819	-0.0113764	0.997115	-0.163604	0.977953
ENSDARG00000001634	kirrel1a	0.17857	0.842328	0.0916198	0.968155	-0.272626	0.929115	-0.414887	0.664023	-0.370501	0.812167
ENSDARG00000001656	psmb13a	-0.0199383	#N/A	-0.668713	#N/A	-0.999683	#N/A	-0.599086	#N/A	-5.83271	#N/A
ENSDARG00000001676	gpm6bb	4.47233	4.04256e-34	-0.724467	0.224395	-3.18137	1.83147e-10	1.11027	0.0535265	0.0821137	0.966799
ENSDARG00000001686	uckl1a	-0.0199386	0.999251	5.13981	0.485661	-0.999732	#N/A	-7.28966	#N/A	-0.43937	0.983213
ENSDARG00000001710	flot1a	-0.995691	0.11137	-0.455023	0.715445	0.900686	0.428988	-0.420104	0.711483	-0.0690766	0.980471
ENSDARG00000001712	si:ch211-247n2.1	-0.585871	0.956768	2.66336	0.776256	5.7775	#N/A	0.584576	#N/A	4.29546	0.661663
ENSDARG00000001721	oc90	-6.26008	0.000811474	0.0924844	0.988817	0.657639	0.970291	-1.29208	0.746489	0.35043	0.971865
ENSDARG00000001729	strn3	-0.0431831	0.980548	-0.0751462	0.969958	-0.228051	0.937405	-0.0451845	0.965786	-0.278386	0.859521
ENSDARG00000001733	gulp1a	-0.584914	0.56801	-0.267287	0.909557	0.0887876	0.981426	-0.618716	0.664023	-2.34596	0.0240948
ENSDARG00000001734	fkbp8	1.13244	0.142436	-0.236982	0.91381	-0.927856	0.554926	1.42959	0.169546	0.615093	0.753944
ENSDARG00000001754	noc2l	-1.85949	7.59637e-06	0.924839	0.1225	-0.151692	0.970291	-0.33595	0.709453	0.0949566	0.964837
ENSDARG00000001760	tnxba	1.31603	0.475932	4.77365	0.00148995	0.709129	0.952585	-3.54524	0.0606363	-0.511836	0.932815
ENSDARG00000001767	slc29a2	-1.43676	0.268067	-0.184606	0.970321	-0.519078	0.947923	-1.5826	0.377031	-1.84229	0.369949
ENSDARG00000001769	ptpra	0.406945	0.340037	-0.515681	0.332285	-0.779134	0.167123	-0.165171	0.82814	-0.53476	0.438863
ENSDARG00000001771	otol1a	-0.0199383	#N/A	-0.668713	#N/A	-6.02725	#N/A	-5.04172	#N/A	-5.24788	#N/A
ENSDARG00000001776	stim2b	-0.402849	0.901901	0.691887	0.884703	0.288306	0.974911	-0.549599	0.88288	0.228291	0.977529
ENSDARG00000001777	nup155	-1.78444	6.84808e-09	0.172168	0.859081	-0.0901522	0.970291	-0.517869	0.354714	-0.247475	0.824277
ENSDARG00000001781	tspan11	-0.33578	0.959845	0.0163789	0.997584	-0.779038	0.970291	-1.6418	#N/A	-0.577892	0.959114
ENSDARG00000001782	prkacba	-7.46801	0.025514	5.21686	0.281057	2.42073	0.807296	-3.04178	#N/A	4.08032	0.602914
ENSDARG00000001785	irx2a	0.783397	0.555107	-0.213548	0.95607	-0.198083	0.972117	-1.35321	0.397819	0.545787	0.884717
ENSDARG00000001788	atp5po	0.752675	0.0889762	-0.225505	0.839635	-0.208136	0.941188	0.757837	0.226043	0.0671153	0.973338
ENSDARG00000001803	kcnh6a	1.71224	0.283239	-1.70967	0.437804	5.66364	0.0131957	4.54852	0.0103152	1.22742	0.738455
ENSDARG00000001804	zgc:112148	5.25706	0.432682	2.88222	0.826637	-0.999765	#N/A	4.67784	#N/A	7.02264	0.54114
ENSDARG00000001807	tnfrsf21	1.62602	7.53249e-06	-0.169857	0.882849	1.91556	0.000757079	1.59399	0.00113551	1.17332	0.0446579
ENSDARG00000001817	zmp:0000000521	0.91812	0.505021	-0.0276999	0.99448	1.81232	0.421955	0.659145	0.756443	0.415939	0.928111
ENSDARG00000001818	c3b.2	6.77823	0.0817432	4.30489	0.396628	-0.999698	0.970291	-0.150464	0.984797	0.131592	0.99427
ENSDARG00000001825	cfap43	-6.04252	0.240944	7.59557	0.224685	-0.741697	0.974509	-6.6267	#N/A	-0.627441	0.974218
ENSDARG00000001829	zgc:112982	-0.300054	0.721824	0.0474667	0.97834	-0.368652	0.880853	-0.487896	0.632164	-0.633373	0.61501
ENSDARG00000001835	nalcn	1.39856	0.47067	1.04389	0.760551	-2.14932	0.490999	-3.27391	0.11788	-0.852887	0.877821
ENSDARG00000001857	aff4	0.111991	0.931592	-0.233745	0.89188	-0.0927592	0.975534	-0.515245	0.623381	-0.391025	0.832918
ENSDARG00000001859	dbx1b	2.4346	0.436255	-8.99538	0.0079397	-4.84636	0.241402	-0.387517	#N/A	-9.73976	0.010875
ENSDARG00000001870	atp1a1a.4	2.77074	0.014348	2.89706	0.0276993	-4.0227	0.00682794	-1.45176	0.434164	1.52822	0.507311
ENSDARG00000001873	phgdh	-0.222228	0.843008	0.0690821	0.977183	-1.83698	0.0377584	-0.557007	0.634909	-1.148	0.302306
ENSDARG00000001879	nav2b	-0.442368	0.659718	-0.420336	0.811383	-0.832	0.611973	0.259543	0.870138	-0.358499	0.898115
ENSDARG00000001880	stx3a	0.468532	0.742041	-0.140704	0.972194	1.06473	0.647905	0.286395	0.89215	-0.144649	0.973451
ENSDARG00000001881	cacnb3a	6.26601	0.0180288	-6.95468	0.0253281	-7.6123	0.0233704	-1.88509	#N/A	-8.49584	0.00910117
ENSDARG00000001882	kbtbd12	6.71307	0.0867864	-0.0696821	0.994676	-0.99972	0.970291	2.69124	#N/A	-0.723202	0.961695
ENSDARG00000001888	ppm1ba	-0.468775	0.586075	0.499371	0.708049	0.701774	0.659551	-0.0517054	0.973098	0.788554	0.568205
ENSDARG00000001889	tuba1a	1.82749	2.8288e-06	0.0442682	0.977347	-2.82189	1.6462e-08	-1.68418	0.0012452	-0.465636	0.649703
ENSDARG00000001890	stt3b	-0.0522071	0.942662	-0.286855	0.616316	0.0482426	0.975534	0.175434	0.775346	0.0639085	0.96445
ENSDARG00000001891	syt14b	1.47137	0.636055	0.972077	0.876014	0.121205	0.989778	-1.30879	#N/A	6.89042	0.137577
ENSDARG00000001897	man2b1	0.121712	0.86205	-0.156547	0.890359	0.765974	0.241402	1.11631	0.0287325	1.59725	0.0017443
ENSDARG00000001898	manea	1.22133	0.262111	-0.143119	0.972194	-0.03757	0.99235	0.291158	0.892426	-0.119305	0.979389
ENSDARG00000001906	si:dkey-247m21.3	5.00189	#N/A	-5.69055	#N/A	-7.0273	#N/A	-1.47933	#N/A	-4.24794	#N/A
ENSDARG00000001909	vill	6.71099	0.00260467	3.22934	0.0867447	-8.19726	0.0019994	-1.7371	0.494784	-0.0618642	0.993926
ENSDARG00000001910	rorab	5.36938	3.6697e-35	-0.0616194	0.975905	-3.26067	5.14426e-08	0.481859	0.576775	0.860415	0.325337
ENSDARG00000001912	drd4-rs	-0.0199386	0.999251	-0.668722	0.973393	-6.44235	#N/A	-7.84908	#N/A	-8.56981	0.248618
ENSDARG00000001913	palmda	3.38927	0.322037	0.0676829	0.994611	-3.31976	0.629162	-2.54807	#N/A	-0.172338	0.990398
ENSDARG00000001929	pink1	-0.112006	0.978866	0.925829	0.69153	0.82354	0.856093	0.185859	0.945662	1.70811	0.443415
ENSDARG00000001930	klhl15	-0.425621	0.733109	0.07375	0.97834	1.48938	0.30628	-0.234169	0.901333	0.32626	0.925931
ENSDARG00000001933	prkag2b	0.524802	0.790973	-0.873046	0.747288	2.2293	0.353813	8.42468	#N/A	0.664641	0.891044
ENSDARG00000001937		4.5594	0.635916	-5.24806	0.719982	-8.14271	#N/A	-0.0473819	#N/A	-1.80534	0.955907
ENSDARG00000001939	b3gat3	-0.0810215	0.977656	-0.475887	0.814582	0.00893542	0.998277	-0.480999	0.764285	-0.553433	0.828112
ENSDARG00000001940	dnajc1	0.935057	0.198518	0.0374945	0.984481	-0.0287299	0.9917	1.07176	0.281518	1.25255	0.260162
ENSDARG00000001950	ak1	9.5645	1.09893e-07	-0.263768	0.9343	-3.44239	0.442763	1.22075	0.446278	-0.165415	0.971001
ENSDARG00000001953	pfkfb3	0.184085	0.908179	0.451016	0.824803	0.867105	0.67413	0.830196	0.548841	1.81973	0.153805
ENSDARG00000001968	dock5	2.83942	0.000675035	-1.61927	0.170622	-2.95616	0.0126891	1.34208	0.336185	-2.08282	0.124989
ENSDARG00000001969	txlng	-1.48133	0.0180288	0.919926	0.329702	0.327949	0.933486	-1.0839	0.256444	0.275693	0.916478
ENSDARG00000001971	cthrc1b	-0.0199386	0.999251	8.25169	0.0614558	-0.999743	0.970291	-0.599133	#N/A	-0.68503	0.962004
ENSDARG00000001975	hsd11b2	1.20617	0.277474	0.251885	0.940067	5.65237	0.0161101	-0.320797	0.881884	-1.02324	0.644966
ENSDARG00000001976	fkbp16	5.88393	0.126852	3.14646	0.572889	-0.999739	0.970291	-2.18227	#N/A	-1.34902	0.914102
ENSDARG00000001993	myhb	1.39616	0.386451	6.11182	8.3014e-07	0.365777	0.970291	-0.402463	0.891692	1.00735	0.77685
ENSDARG00000001994	stxbp1a	3.42548	6.08942e-05	-0.678027	0.7384	-3.46751	0.00361755	-1.75694	0.189396	-0.343684	0.931551
ENSDARG00000001999	adamts18	-0.0272653	0.999251	-0.615807	0.753287	-1.53341	0.312527	-2.14783	0.0640605	-2.5521	0.0350832
ENSDARG00000002002	lmcd1	1.72318	0.592121	0.38942	0.969958	-0.577973	0.970291	-0.270738	0.960895	-1.18428	0.898829
ENSDARG00000002006	rxrbb	0.649092	0.418119	-0.151054	0.949664	0.889081	0.534754	-0.173724	0.907423	0.0734374	0.981877
ENSDARG00000002013	grb10a	-1.09359	0.187554	1.16895	0.274006	0.0333488	0.991523	-0.180955	0.918953	0.473894	0.851062
ENSDARG00000002016	ppil2	-0.762287	0.296839	0.147452	0.949179	0.206714	0.970291	-0.438318	0.718675	-0.154634	0.957167
ENSDARG00000002020	rictorb	-0.302446	0.683483	0.0133671	0.994453	0.527449	0.696832	-0.111789	0.925411	0.0623544	0.980117
ENSDARG00000002021	pygb	0.175181	0.885337	-0.779793	0.450094	3.13303	6.31e-05	3.11971	2.32212e-05	1.02966	0.387733
ENSDARG00000002026	qkib	3.34864	2.40878e-13	-0.795081	0.297822	-1.81878	0.00961973	0.790544	0.3386	0.310472	0.870005
ENSDARG00000002031	tox4a	-0.596261	0.588047	0.0567977	0.98076	-0.622168	0.830564	-0.714276	0.628443	-0.864763	0.649703
ENSDARG00000002037	pfkfb2b	8.61644	2.59404e-05	-2.76272	0.128302	-5.76431	0.0543668	0.385165	#N/A	-2.65973	0.264282
ENSDARG00000002060	brf2	-0.602453	0.79175	0.404487	0.929627	-0.619729	0.954777	-0.824713	#N/A	-0.680818	0.903484
ENSDARG00000002071	adss	10.1116	3.60031e-07	-0.430644	0.917892	-7.7643	0.00215876	0.6804	0.807896	-0.507642	0.929042
ENSDARG00000002077	mnat1	-0.135968	0.955218	-0.649958	0.751252	1.2163	0.550096	0.0858437	0.968056	3.01393	0.0530705
ENSDARG00000002082	csnk2a1	0.0182564	0.998494	0.0203712	0.983173	0.224349	0.876917	0.196571	0.768282	0.492802	0.446607
ENSDARG00000002084	lamb2	3.2982	5.46073e-22	-0.961869	0.0463909	0.166159	0.968194	3.17667	2.95397e-13	1.85353	0.000229551
ENSDARG00000002097	si:dkeyp-52c3.7	-0.0199383	#N/A	7.123	#N/A	-3.44228	#N/A	-6.36349	#N/A	5.9865	#N/A
ENSDARG00000002127	stam	0.36284	0.54395	-0.291388	0.785885	-0.150312	0.970291	-0.220117	0.81677	0.495794	0.63825
ENSDARG00000002128	cwf19l1	-0.124289	0.941439	0.35397	0.856583	-0.802099	0.647901	-0.329613	0.828968	0.0832906	0.980635
ENSDARG00000002131	celf2	1.22991	0.00771949	-0.85207	0.186137	-0.0994202	0.970944	-0.347184	0.704502	-0.337539	0.820829
ENSDARG00000002165	psme1	0.663613	0.82134	1.5004	0.658805	6.40859	0.118056	7.49276	0.0345929	2.31263	0.528796
ENSDARG00000002167	cacnb1	0.583978	0.831774	-0.998379	0.797465	-1.77198	0.653207	-1.97449	0.451695	-2.84605	0.305266
ENSDARG00000002168	tra2b	-0.595336	0.346496	0.138206	0.941067	-0.552291	0.689106	-0.715524	0.403298	0.31427	0.869067
ENSDARG00000002172	aplnra	-0.576676	0.659514	-2.39235	0.0239983	1.34515	0.462273	1.94345	0.134669	-0.498394	0.887527
ENSDARG00000002174	itfg2	-0.840422	0.725846	-2.8872	0.17956	0.347468	0.970291	1.69313	0.540869	-3.40957	0.180646
ENSDARG00000002184	igbp1	-0.114315	0.942193	0.764333	0.487222	-0.138353	0.970944	-0.219138	0.885173	1.44613	0.182031
ENSDARG00000002190	chmp2bb	3.07096	1.24209e-09	-0.379361	0.777687	0.067446	0.982298	2.30584	0.000851315	1.63232	0.0499218
ENSDARG00000002192	aspn	0.5399	0.895418	-1.06031	0.852843	1.67897	0.827123	-0.762665	0.872635	-4.62668	0.157749
ENSDARG00000002193	rho	4.26817	0.164492	8.18611	0.000186927	-0.99974	0.970291	-5.52182	0.0479375	-2.10495	0.663566
ENSDARG00000002194	rhd	-5.7782	1.65535e-05	-1.18389	0.708775	2.62175	0.312192	-4.12756	0.0336643	-1.44342	0.704032
ENSDARG00000002196	bach1b	-0.166568	0.896874	-0.0930756	0.972815	1.25719	0.263185	0.883986	0.409913	0.494485	0.800695
ENSDARG00000002197	pygl	0.149317	0.908175	4.5956	2.86523e-17	0.693706	0.72967	-0.736424	0.487426	1.7529	0.0364469
ENSDARG00000002204	hspb11	10.0217	0.0013542	-3.05665	0.527265	-0.999699	0.970291	5.41489	#N/A	1.40578	0.903484
ENSDARG00000002210	stk25a	0.281379	0.97053	-0.155764	0.98257	-0.63779	0.970291	-0.91724	#N/A	-0.835505	0.937479
ENSDARG00000002213	invs	-0.866867	0.516092	0.399206	0.896788	0.0750712	0.987751	-0.407769	0.85867	-0.599107	0.870837
ENSDARG00000002215	rtca	-0.256088	0.804752	-1.36311	0.0809239	-0.747385	0.608981	-0.102567	0.945334	-0.677088	0.647655
ENSDARG00000002216	tbx3a	-1.07934	0.134907	1.11753	0.227683	-0.900971	0.519007	-1.98542	0.019945	-1.83144	0.0507304
ENSDARG00000002217	scocb	0.381339	0.674553	-0.574388	0.630974	0.697893	0.656306	0.225163	0.873786	0.36488	0.873065
ENSDARG00000002219	si:dkey-103j14.5	-0.0199383	0.999251	7.93971	0.579257	-0.999683	#N/A	-5.62655	#N/A	1.1908	0.973709
ENSDARG00000002220	zgc:103692	0.689471	0.6726	0.140142	0.975905	-0.114435	0.98442	0.369654	0.885383	0.430352	0.928746
ENSDARG00000002230	sypb	7.27652	1.47474e-05	2.8118	1.1379e-05	-6.45914	0.00112578	-2.173	0.00690838	-0.223023	0.935535
ENSDARG00000002231	plpp2a	-5.13507	9.24308e-05	3.47182	0.0433681	2.88697	0.208073	-3.97438	0.0328619	-0.670762	0.903921
ENSDARG00000002235	mmp14a	1.01176	0.134301	0.270757	0.879638	-0.724119	0.631291	-0.355712	0.778668	-1.44006	0.13404
ENSDARG00000002240	psmb6	0.040685	0.980548	-0.746789	0.199101	0.43463	0.706829	0.889567	0.14408	0.257871	0.866773
ENSDARG00000002241	kcna2a	2.83825	0.712578	3.62382	0.727468	-0.999762	#N/A	-4.271	#N/A	5.34543	0.660691
ENSDARG00000002249	tbxas1	2.74401	0.0167717	0.300039	0.941186	2.35739	0.335622	1.12963	0.578391	0.776763	0.834535
ENSDARG00000002255	epb41l3a	0.392507	0.749769	0.201399	0.943506	0.439264	0.923529	-1.31158	0.271251	0.108936	0.977841
ENSDARG00000002259	ca15c	-0.0199383	#N/A	-0.668713	#N/A	-0.999683	#N/A	-0.599086	#N/A	-1.80521	#N/A
ENSDARG00000002264	mrpl41	0.607012	0.757185	-0.826304	0.777462	-0.215188	0.975534	-1.06209	#N/A	-1.81439	0.456127
ENSDARG00000002267	dcaf13	-0.871669	0.151287	1.15324	0.102205	-0.67591	0.598294	-0.0870601	0.948772	0.488785	0.743896
ENSDARG00000002271	zfand5b	0.756603	0.04529	-0.017461	0.988505	-0.252271	0.877271	0.305097	0.660254	0.412144	0.631701
ENSDARG00000002285	mcoln1a	1.57191	0.000243737	-0.790502	0.214827	1.19222	0.101339	2.06796	0.00017071	1.05636	0.156125
ENSDARG00000002293	si:ch211-197g15.6	-0.0199386	0.999251	-0.668721	0.975166	-0.999758	#N/A	-4.62673	#N/A	-1.8053	0.936716
ENSDARG00000002295	si:dkey-21p1.3	5.60945	#N/A	-6.2981	#N/A	-0.999798	#N/A	-0.21969	#N/A	-1.80533	#N/A
ENSDARG00000002298	ankrd22	7.07842	0.00166831	2.02868	0.412197	-0.999723	0.970291	3.05658	#N/A	7.99049	0.0257082
ENSDARG00000002299	arsh	0.631074	0.730331	1.14545	0.599513	-1.1642	0.729989	-0.795384	0.731956	-0.78019	0.838473
ENSDARG00000002300	p2rx2	-0.0199386	0.999251	7.54834	0.260217	-5.76428	#N/A	-4.04176	#N/A	0.799252	0.969034
ENSDARG00000002304	gins2	-3.43424	0.0788338	1.41777	0.725781	1.11079	0.908089	-0.00760374	0.999043	-0.390298	0.96445
ENSDARG00000002305	me3	1.01857	0.165799	0.273641	0.88938	-0.576337	0.790897	0.113333	0.942838	-0.0606636	0.986076
ENSDARG00000002311	fabp11b	-0.0199383	#N/A	-0.668713	#N/A	-0.999683	#N/A	-0.599086	#N/A	-1.80521	#N/A
ENSDARG00000002330	lhx8a	4.05195	0.50666	0.8835	0.961199	-0.999756	0.971359	-3.72473	#N/A	-4.3242	0.678252
ENSDARG00000002332	frmd6	-0.787631	0.751174	-2.113	0.398317	-0.38095	0.970291	-0.834538	0.801522	-3.96165	0.097984
ENSDARG00000002333	fam102bb	-0.494647	0.630378	0.398416	0.836713	0.0178816	0.995808	-1.05136	0.366566	0.191048	0.955468
ENSDARG00000002336	dlc	-0.434282	0.501166	0.614022	0.444957	-0.770456	0.421901	-0.919767	0.209808	0.325436	0.844043
ENSDARG00000002339	sgf29	0.126285	0.959029	-0.0580938	0.982016	-0.727654	0.809744	-0.810448	0.611612	-0.00261996	0.999774
ENSDARG00000002344	tubb4b	0.338631	0.364558	0.0299175	0.978057	-0.0621388	0.971359	0.566514	0.214213	0.753439	0.107483
ENSDARG00000002347	cyp11a1	-7.75002	#N/A	-0.668713	#N/A	6.7304	#N/A	-0.599086	#N/A	-1.80521	#N/A
ENSDARG00000002353	tagapa	0.330721	0.866753	3.76248	0.000615133	0.452696	0.967146	1.42636	0.444503	3.65141	0.0107191
ENSDARG00000002355	shpk	2.59433	0.48825	-0.460033	0.970927	0.980237	0.970291	0.673203	#N/A	0.675734	0.961036
ENSDARG00000002362	ubald1a	0.374189	0.742983	-0.449788	0.806231	1.17335	0.42317	-0.348276	0.823722	-0.0601564	0.987513
ENSDARG00000002365	cers5	2.17243	0.0133717	-0.283692	0.920457	-0.176472	0.972329	3.49286	0.00150508	1.31266	0.455928
ENSDARG00000002369	si:ch211-202a12.4	0.759635	0.063617	-0.143769	0.905554	-0.105618	0.970291	1.20768	0.0170086	1.24556	0.0215152
ENSDARG00000002377	mief2	0.122199	0.967355	-0.025927	0.994487	0.00482204	0.99921	0.623522	0.755159	0.569175	0.879175
ENSDARG00000002385	atm	-0.79835	0.109641	-0.0948833	0.961242	0.0786819	0.975534	-0.10037	0.92785	-0.369119	0.786708
ENSDARG00000002391	tlcd1	-0.0199386	0.999251	7.91227	0.0955972	-0.999698	0.970291	-5.62671	#N/A	0.0111813	0.999638
ENSDARG00000002394	ugt5d1	-0.0199384	0.999251	7.68633	0.510684	-0.999687	#N/A	-0.599087	#N/A	0.522338	0.988019
ENSDARG00000002396	cry-dash	2.85171	3.85002e-09	0.051899	0.978099	-0.0315725	0.989536	3.53807	1.26078e-08	1.18441	0.179391
ENSDARG00000002401	gale	1.0147	0.680343	1.02594	0.806548	0.431086	0.970291	0.346966	0.92938	0.722581	0.916616
ENSDARG00000002402	ercc3	-0.830224	0.0357413	0.888467	0.0632611	-0.047952	0.980252	-0.3274	0.656983	0.809994	0.217482
ENSDARG00000002403	nusap1	-1.51024	0.00528652	0.864304	0.288819	-0.254917	0.951984	-1.10983	0.172872	-0.355427	0.851806
ENSDARG00000002405	si:ch211-225b11.1	-1.37624	0.00442446	-0.45069	0.647527	2.69648	9.69298e-06	2.30676	0.000154603	1.92498	0.00558122
ENSDARG00000002406	zmynd10	-1.09107	0.8842	-5.92858	0.37021	-0.918715	0.970291	-1.78188	#N/A	-8.24789	0.236887
ENSDARG00000002411	pde4cb	-1.96747	0.169101	2.32067	0.187494	-0.104917	0.987209	-1.16355	0.623138	0.485833	0.930749
ENSDARG00000002445	prdm1a	-2.16117	0.02906	0.191242	0.964	0.758742	0.830874	-2.22004	0.103825	-0.202541	0.964837
ENSDARG00000002463	arhgef37	-0.930292	0.524609	0.236734	0.95761	0.130932	0.981205	-0.72561	0.742312	-0.0628354	0.991248
ENSDARG00000002467	rdh14b	0.122752	0.987664	0.116707	0.979662	0.0627714	0.992303	2.49916	0.303295	1.56386	0.68069
ENSDARG00000002479	ercc6l	-2.77742	2.88005e-09	-0.130966	0.947437	0.217368	0.966549	-1.53746	0.0276455	-1.2675	0.125732
ENSDARG00000002483	wnt7ab	-2.05277	0.714533	-4.26404	0.560044	-1.62155	0.9538	2.99623	#N/A	-9.10585	0.129548
ENSDARG00000002487	noc3l	-1.43493	0.0180549	0.46259	0.728496	-0.114456	0.973282	-0.346529	0.782364	0.340876	0.883544
ENSDARG00000002494	itgb6	6.96731	0.0154716	1.81224	0.709038	-8.72777	0.0171566	-2.59366	#N/A	-0.845783	0.932138
ENSDARG00000002506	zgc:92818	2.43532	0.00317058	-0.67553	0.709638	-0.296646	0.970291	2.18839	0.0617214	1.20424	0.496719
ENSDARG00000002507	itga10	-0.267048	0.919949	2.71282	0.0792461	-1.05664	0.795028	-2.68674	0.12143	-0.920391	0.800695
ENSDARG00000002508	ankrd33ab	1.36742	#N/A	-2.05607	#N/A	-0.999683	#N/A	0.788274	#N/A	-8.24766	#N/A
ENSDARG00000002509	zgc:153911	0.844704	0.788258	0.526806	0.935767	2.50993	0.589893	1.84919	0.595064	3.50153	0.326719
ENSDARG00000002510	dmbx1b	-4.81303	0.287187	8.1709	0.0910909	-5.90663	0.33244	-9.56529	#N/A	-1.08069	0.943092
ENSDARG00000002523	hsdl2	0.562619	0.373775	-0.0893202	0.968781	-0.015449	0.994568	1.36292	0.0523863	0.506866	0.698482
ENSDARG00000002533	adora2b	-2.97383	0.0787562	1.61531	0.5849	1.33896	0.803432	-1.53624	#N/A	-0.562701	0.936153
ENSDARG00000002536	tm9sf4	0.742623	0.110789	-0.662428	0.296956	0.415758	0.742271	1.20282	0.0367992	0.674528	0.418906
ENSDARG00000002538	smu1a	-0.644168	0.341834	-0.0718733	0.975716	-0.515369	0.76418	-0.36094	0.747832	-0.120423	0.96386
ENSDARG00000002546	rundc3ab	9.72434	7.36186e-07	-0.982476	0.718076	-9.44237	5.34797e-05	-1.69408	0.412084	-1.27681	0.682342
ENSDARG00000002549	eif3eb	0.766623	0.475739	-0.207991	0.94609	0.822172	0.740227	0.446928	0.798832	0.908828	0.653511
ENSDARG00000002552	mapkapk2a	-0.326921	0.575234	-0.522715	0.459366	0.077533	0.974206	0.562387	0.429434	-0.120526	0.952022
ENSDARG00000002564	syngr1a	8.7316	1.80812e-26	-1.52115	0.224796	-3.06263	0.0206764	4.69423	4.77373e-06	2.73433	0.0312174
ENSDARG00000002571	tmod2	-0.0292874	0.998494	0.041683	0.979053	0.0467646	0.985753	0.604115	0.506191	-0.115014	0.962837
ENSDARG00000002576	cabp5a	-5.11092	#N/A	-0.668713	#N/A	4.09115	#N/A	-0.599234	#N/A	-1.80536	#N/A
ENSDARG00000002582	tbx15	-0.66387	0.784932	-1.49297	0.588283	-0.826145	0.922329	-2.02993	0.401942	-4.067	0.0612613
ENSDARG00000002587	dpysl3	1.96478	2.46862e-09	0.0757298	0.960845	-1.51477	0.00145296	-1.57241	0.000304866	-0.480231	0.541953
ENSDARG00000002589	mylpfb	11.9033	1.23789e-11	0.953292	0.56592	-8.14282	0.000140989	1.57767	0.261989	2.56939	0.0574675
ENSDARG00000002591	ruvbl1	-0.690166	0.207646	-0.397164	0.695135	0.210379	0.960191	-0.908503	0.205508	-1.11721	0.141756
ENSDARG00000002593	slc45a2	4.23546	1.76454e-06	-2.42061	0.0371044	-2.61883	0.0675863	11.9145	4.30843e-06	4.51377	0.00434818
ENSDARG00000002597	pabpc1l	-0.0199383	#N/A	-0.668713	#N/A	-0.999683	#N/A	-0.599086	#N/A	-1.80521	#N/A
ENSDARG00000002600	pcsk1	-2.51939	0.401847	3.69662	0.297404	0.227766	0.985091	-5.17363	0.128339	-0.419698	0.970282
ENSDARG00000002601	irx7	-0.731593	0.719821	0.669445	0.856583	-1.57387	0.620796	-1.98829	0.348407	-0.471612	0.936098
ENSDARG00000002607	unm_sa1614	1.87891	1.06436e-05	-0.515124	0.524956	1.58602	0.0196369	0.49616	0.543555	2.02259	0.000902781
ENSDARG00000002609	rnf145a	-2.89439	0.00476476	-1.32487	0.450819	0.690962	0.886627	-2.30521	0.124374	-2.89162	0.0645226
ENSDARG00000002613	rpa3	-2.28183	0.525622	-7.17899	0.0791439	-0.193763	0.987751	-1.11644	#N/A	-8.64022	0.0529398
ENSDARG00000002632	anxa11b	1.71064	1.08729e-08	0.0593312	0.968727	0.320904	0.751075	2.73097	7.39318e-14	1.82449	5.77427e-06
ENSDARG00000002634	b4galt1	2.61545	0.129762	0.383488	0.947587	-1.04312	0.888857	0.95894	0.763009	0.983332	0.857716
ENSDARG00000002635	zgc:85722	7.60104	0.000365011	-0.871836	0.811129	-7.34926	0.0064664	-2.33964	0.284352	-2.41501	0.356308
ENSDARG00000002642	sh3gl1b	-0.812109	0.210254	1.0006	0.204608	-0.143266	0.970291	-0.0426172	0.975914	0.559107	0.698277
ENSDARG00000002644	rgs5a	9.00046	7.77672e-06	0.0399605	0.993152	-8.02733	0.00136184	1.22376	0.616598	-3.40757	0.0806154
ENSDARG00000002656	stxbp5a	2.66391	0.0112214	-0.0829761	0.979267	1.72047	0.437026	0.528814	0.814556	1.06559	0.685822
ENSDARG00000002659	mapre1b	0.221433	0.770121	-0.417746	0.652795	-0.202638	0.961131	0.353179	0.698453	0.00121281	0.999841
ENSDARG00000002663	optn	3.2067	4.80356e-06	0.455536	0.816626	0.41286	0.937191	3.08592	0.00111956	3.12533	0.00188218
ENSDARG00000002666	kcnj1b	5.48748	0.246865	-1.41898	0.902779	-8.83465	0.155356	-2.53431	#N/A	-4.44492	0.589088
ENSDARG00000002670	zgc:113944	-0.355034	0.754691	-1.40099	0.144783	0.37484	0.934132	0.217966	0.897766	-1.20589	0.373652
ENSDARG00000002682	tbcela	3.02702	0.00068456	-0.832251	0.647119	-1.41452	0.469211	0.0944542	0.96562	-0.387257	0.922157
ENSDARG00000002690	rabif	0.237937	0.872281	0.446947	0.82799	0.851485	0.69776	0.509975	0.748914	0.605902	0.799616
ENSDARG00000002696	gnb3b	-0.0199387	0.999251	12.8985	1.1275e-13	-0.999725	0.970291	-6.62672	0.000849517	-0.934504	0.470324
ENSDARG00000002701	rasl12	1.33041	0.786709	1.53312	0.850061	-1.5977	0.931242	-0.16867	#N/A	-1.37461	0.908768
ENSDARG00000002707	her11	4.77896	#N/A	-5.46761	#N/A	-6.90159	#N/A	4.19981	#N/A	-5.83271	#N/A
ENSDARG00000002710	ncl	-1.31256	0.000301496	0.367821	0.622921	-0.196178	0.938982	-0.432842	0.520149	-0.252262	0.847616
ENSDARG00000002720	utp15	-1.18038	0.169427	0.943663	0.459488	-0.955524	0.59255	-0.19598	0.915686	-0.102029	0.979019
ENSDARG00000002722	ankrd2	1.3674	#N/A	5.47685	#N/A	-0.999775	#N/A	0.788159	#N/A	5.7276	#N/A
ENSDARG00000002728	kiss1ra	-0.0199383	#N/A	-0.668713	#N/A	-6.02715	#N/A	-6.04157	#N/A	-1.80521	#N/A
ENSDARG00000002731	sdc2	0.0500301	0.972195	0.517005	0.48808	1.04167	0.136025	0.30707	0.726373	-0.393495	0.740886
ENSDARG00000002732	spon2b	1.03489	0.806847	0.519335	0.960245	5.21347	0.400002	-1.35869	#N/A	-3.59917	0.468534
ENSDARG00000002745	tdh	1.2275	0.000826235	-1.71557	1.08989e-05	1.01014	0.0808726	2.16391	8.30907e-07	1.20009	0.0293896
ENSDARG00000002748	sema6d	-1.5709	0.120253	0.180842	0.96445	1.23169	0.552853	-1.65418	0.239081	-1.56803	0.360973
ENSDARG00000002750	phf20a	1.42299	0.127902	-0.31699	0.904496	-1.06036	0.599814	-1.02252	0.477778	-0.418341	0.90433
ENSDARG00000002754	pdcd2l	-0.521245	0.798259	0.825255	0.775157	0.456047	0.970291	-0.393106	#N/A	0.117108	0.985688
ENSDARG00000002758	dedd1	0.737557	0.232835	0.170283	0.922045	1.64634	0.0329698	0.414592	0.689278	-0.0750139	0.977755
ENSDARG00000002760	gdf5	6.59336	0.00815025	0.555191	0.927727	0.41322	0.979172	-0.059901	0.988901	-2.31967	0.566695
ENSDARG00000002764	miox	3.21906	0.300265	3.03152	0.445313	2.17013	0.883292	0.559711	0.924674	1.3376	0.884717
ENSDARG00000002768	pvalb2	13.2158	7.87507e-16	0.876479	0.398317	-6.44238	0.00278984	1.47977	0.110994	3.02526	0.000237127
ENSDARG00000002771	si:ch211-48m9.1	-0.0199386	0.999251	5.02089	0.461167	-5.44236	0.534459	-0.599119	#N/A	-5.21646	0.48815
ENSDARG00000002773	htr1fa	-7.00023	#N/A	-0.668713	#N/A	5.98061	#N/A	-0.599086	#N/A	-5.83271	#N/A
ENSDARG00000002779	pdx1	-6.45567	0.0608968	9.39978	0.0117361	0.186002	0.988464	-7.04175	#N/A	3.23562	0.616146
ENSDARG00000002787	tle3a	-0.301859	0.667888	-0.225918	0.868651	-0.976662	0.219661	-0.867435	0.228187	-0.721299	0.443828
ENSDARG00000002790	ap2m1a	-1.34781	1.45969e-05	-0.271154	0.709689	1.58273	0.000165027	0.687983	0.167406	0.571887	0.368789
ENSDARG00000002791	atp1a1a.1	0.462663	0.161621	-0.0911187	0.925404	0.276365	0.762776	1.15288	0.00152033	0.763914	0.0901484
ENSDARG00000002792	arcn1a	0.327042	0.552892	0.0170668	0.990198	-0.553047	0.533137	0.293474	0.714923	0.0263015	0.990012
ENSDARG00000002795	meis3	-1.71001	0.466345	-3.05521	0.242731	-0.876755	0.946617	-1.13755	0.758016	-3.41308	0.288978
ENSDARG00000002798	cog8	-0.273523	0.875173	-0.580001	0.800994	0.856161	0.766197	0.266226	0.90276	1.29384	0.518488
ENSDARG00000002816	rasgrf2b	3.53278	0.0606905	-8.6181	0.00100875	3.39693	0.586817	-0.76481	#N/A	-10.1548	0.000235049
ENSDARG00000002826	cep57l1	-2.23562	0.0267281	-0.494693	0.859353	0.388579	0.970291	-0.432885	0.845595	-1.63352	0.384374
ENSDARG00000002830	trmt2a	-1.70174	0.041401	0.525601	0.791173	0.0693793	0.986372	-0.294267	0.876259	0.211749	0.956667
ENSDARG00000002831	col4a4	0.0322838	0.999251	0.452291	0.954433	-1.9544	0.738359	-0.490338	0.91945	-0.823405	0.92459
ENSDARG00000002840	si:dkey-28b4.8	1.25104	0.0494225	0.820187	0.393208	-1.5298	0.0994566	-2.10999	0.0057387	-0.280771	0.910886
ENSDARG00000002847	fndc1	6.51578	0.0778024	1.59725	0.844145	-6.61229	0.24257	-2.23394	#N/A	-2.6261	0.746594
ENSDARG00000002872	zgc:113210	0.417466	0.706434	0.0569723	0.979436	-0.997087	0.532205	-1.53758	0.140977	-0.562714	0.797074
ENSDARG00000002877	reps1	0.28719	0.648007	-0.682461	0.282202	0.146141	0.970291	1.08951	0.0700649	0.199323	0.912624
ENSDARG00000002880	vps50	0.606796	0.512754	-0.879617	0.44317	0.0877746	0.980252	0.26824	0.867474	-0.417405	0.871594
ENSDARG00000002894	aven	-0.719251	0.589639	-0.704075	0.749259	0.373981	0.970291	-0.540376	0.787454	-1.53396	0.407555
ENSDARG00000002897	si:ch211-160o17.2	-0.0756775	0.988396	-0.400456	0.888119	1.23635	0.577244	1.10257	0.506189	-0.126369	0.979019
ENSDARG00000002909	tjp3	-0.094718	0.98545	0.998545	0.642841	-2.602	0.121127	-1.37926	0.452983	-2.28899	0.198211
ENSDARG00000002912	adipor1a	0.479666	0.449153	-0.016131	0.992734	-0.151351	0.970291	-0.448383	0.623138	-0.180626	0.934617
ENSDARG00000002916	sec31b	0.0430977	0.980611	-0.527909	0.480618	-0.271179	0.908031	-0.156015	0.878942	-0.60826	0.512483
ENSDARG00000002917	gls2b	6.65379	0.2091	-1.71476	0.896494	-0.999695	#N/A	2.63199	#N/A	-0.205154	0.993075
ENSDARG00000002933	gbx2	-2.31943	0.244328	-1.06664	0.807442	1.44107	0.8056	-2.18096	0.448799	-1.21388	0.827436
ENSDARG00000002937	meis1a	-0.0334641	0.999251	-0.522048	0.712388	-0.747216	0.651082	-0.387609	0.773798	-1.27069	0.264282
ENSDARG00000002945	bgnb	8.04312	0.000237332	0.447979	0.929665	-0.999728	0.970291	-1.42164	0.609805	-2.74058	0.308756
ENSDARG00000002947	abcd3b	-0.338884	0.849001	1.58488	0.261079	0.775741	0.837698	-1.20148	0.468608	0.0804274	0.987513
ENSDARG00000002949	ppp6c	-0.299484	0.725498	-0.102974	0.966932	0.376009	0.878327	0.565578	0.56396	0.351435	0.854991
ENSDARG00000002952	smo	-0.728232	0.290864	-0.804288	0.376883	-0.947236	0.392795	-0.621907	0.542701	-1.64699	0.052354
ENSDARG00000002956	si:dkey-32n7.4	-2.3829	0.0163452	1.19691	0.470218	2.22782	0.161448	0.649616	0.747832	2.60678	0.0955294
ENSDARG00000002959	gpr34b	0.850367	#N/A	-7.81527	#N/A	-0.487862	#N/A	0.935043	#N/A	-1.80521	#N/A
ENSDARG00000002967	pdap1b	0.588668	0.549686	0.295222	0.892357	0.393778	0.93273	0.745887	0.567016	0.385495	0.894425
ENSDARG00000002968	a1cf	0.318999	0.924526	4.55072	0.00710991	-1.26427	0.811605	-1.82428	0.476469	1.47476	0.69508
ENSDARG00000002970	ss18	0.396527	0.559534	-0.395249	0.712281	-0.918573	0.297615	-0.797322	0.306817	-0.827213	0.376974
ENSDARG00000002971	phc1	-1.18188	0.0078894	-0.206507	0.876014	-0.119241	0.970291	-1.00609	0.117831	-0.874993	0.267829
ENSDARG00000002986	gda	-1.32318	0.911661	1.11959	0.964	5.63256	#N/A	2.28728	#N/A	5.31208	0.747492
ENSDARG00000002988	tnnt2d	7.7863	2.53494e-05	2.37481	0.0350393	-4.44238	0.164293	-0.790113	0.66188	2.7945	0.0549798
ENSDARG00000002991	cep135	-0.0492227	0.983809	-0.0701709	0.975898	0.7799	0.513095	-0.349382	0.752683	0.316661	0.879529
ENSDARG00000002994	itpkca	0.244921	0.87874	0.806235	0.615332	-0.870657	0.705379	-1.38545	0.286905	-0.0935647	0.983164
ENSDARG00000003008	prkcea	2.69055	1.25293e-09	-0.404843	0.70125	-1.01742	0.227336	1.82426	0.00334437	1.78927	0.0077375
ENSDARG00000003017	ube2al	0.987638	0.0636221	0.3963	0.714956	0.607337	0.636887	0.806075	0.315658	0.897116	0.330243
ENSDARG00000003020	lrrc4.2	6.66398	0.0394344	-7.35264	0.0588288	-6.24973	0.208812	-2.33511	#N/A	-7.05527	0.13514
ENSDARG00000003021	hdac8	-6.92011	0.149154	-0.668722	0.973074	-0.54217	#N/A	-5.8491	#N/A	-8.33534	0.245603
ENSDARG00000003022	limk1b	-1.60037	0.117092	-0.385696	0.892266	1.90199	0.232761	1.33411	0.396056	1.23201	0.562675
ENSDARG00000003027	scnm1	1.19222	0.393268	-0.313983	0.934465	-0.41429	0.970291	1.78344	0.321816	0.516991	0.911829
ENSDARG00000003032	eif4a1b	0.364024	0.375995	0.299277	0.650868	0.252387	0.843801	0.488791	0.364891	0.959511	0.0476122
ENSDARG00000003035	hspa9	-0.621267	0.0822827	0.451853	0.396362	-0.0775892	0.970291	-0.231687	0.729052	-0.171753	0.89998
ENSDARG00000003041		-0.27782	0.851186	-1.63423	0.130703	0.71578	0.790376	0.760996	0.612476	-0.475208	0.879175
ENSDARG00000003046	sorbs2a	1.06002	0.31547	-2.21553	0.036218	1.97208	0.165524	1.11549	0.451089	0.965283	0.651175
ENSDARG00000003054	tacr3l	4.55855	#N/A	3.82491	#N/A	-5.44221	#N/A	3.9794	#N/A	3.82434	#N/A
ENSDARG00000003058	fgfr1op	0.1953	0.899076	0.190575	0.94698	0.0368931	0.991167	0.878165	0.510938	1.37084	0.329549
ENSDARG00000003061	cd276	-1.40944	0.03824	0.666411	0.58776	0.117418	0.974911	-0.423347	0.751458	-0.052008	0.988123
ENSDARG00000003068	gorasp1a	-0.829799	0.388283	-0.0154777	0.994966	0.132396	0.975534	-0.0570042	0.976414	-0.473005	0.865893
ENSDARG00000003069	btbd7	-0.584831	0.335921	0.530256	0.555624	-0.883856	0.328633	-1.45081	0.028581	-0.439256	0.749596
ENSDARG00000003077	si:ch73-111m19.2	-3.64864	#N/A	-0.668713	#N/A	2.62902	#N/A	-0.599086	#N/A	-5.83271	#N/A
ENSDARG00000003081	mybphb	2.7841	1.49273e-05	0.582797	0.68697	-1.7711	0.0948335	0.830129	0.483262	1.64961	0.132826
ENSDARG00000003084	spire2	3.58208	0.427702	0.36837	0.976535	-8.83467	0.0697376	-4.43972	#N/A	-4.65317	0.427524
ENSDARG00000003085	stambpl1	0.872503	0.810436	1.36395	0.794918	-1.64028	0.837698	-1.63167	0.692454	0.120842	0.991248
ENSDARG00000003087	ubxn6	1.45985	0.0146331	0.292838	0.861329	-0.256847	0.964539	0.982452	0.293192	1.2399	0.218715
ENSDARG00000003091	oclnb	0.791073	0.78456	-0.290718	0.970437	-0.826367	0.948675	-0.822848	0.827921	-0.714194	0.924868
ENSDARG00000003098	kdm5bb	0.512646	0.172226	-0.262799	0.717927	-0.887966	0.0724363	-0.911626	0.0423813	-0.223011	0.842873
ENSDARG00000003109	rcan1a	0.849645	0.113214	-0.0904389	0.967602	0.37554	0.847976	1.08014	0.129875	0.446708	0.739564
ENSDARG00000003113	ada	3.20556	0.0126034	0.563488	0.879638	0.337683	0.970291	-0.515669	0.857942	0.442366	0.937578
ENSDARG00000003127	zgc:123105	-0.89685	0.144744	0.567561	0.580782	0.162739	0.970291	-0.0162425	0.98962	0.125777	0.961638
ENSDARG00000003132	apip	0.310555	0.753719	0.116315	0.966912	0.520857	0.810912	1.98151	0.0159305	1.18283	0.283538
ENSDARG00000003142	dachc	-0.0189759	0.999251	-2.50679	0.24915	0.360846	0.970291	-1.14941	0.695243	-3.14949	0.211956
ENSDARG00000003144	pxmp2	0.686946	0.84286	-0.629546	0.91972	2.29561	0.655606	3.4031	#N/A	1.97309	0.6995
ENSDARG00000003146	si:dkey-27m7.4	-0.0199385	#N/A	3.85893	#N/A	-4.44234	#N/A	-0.599143	#N/A	-1.30517	#N/A
ENSDARG00000003151	skp1	1.24274	0.00140384	-0.415398	0.580403	-0.64851	0.413474	0.876793	0.133526	0.689824	0.361654
ENSDARG00000003153	nudt21	0.24769	0.861507	-0.41197	0.842112	-0.566922	0.850633	-0.0463226	0.981342	-0.604811	0.789412
ENSDARG00000003157	nfkbil1	-0.97474	0.751562	-0.196086	0.977956	0.938579	0.946617	-0.615607	#N/A	1.38783	0.832564
ENSDARG00000003165	nr2f6b	-0.347352	0.743406	0.597366	0.655947	-1.56847	0.134941	0.764451	0.519663	0.824383	0.589387
ENSDARG00000003167	mlst8	-0.0132727	0.999251	0.0340571	0.98407	0.458824	0.824341	0.618666	0.538587	0.924606	0.403346
ENSDARG00000003169	magi1b	1.69067	2.52639e-07	-0.396593	0.534169	-1.92975	1.00221e-05	-0.720732	0.173895	-0.10825	0.948821
ENSDARG00000003175	stx5al	1.00711	0.215984	-0.192539	0.938846	-0.203262	0.970291	1.18963	0.281546	0.666111	0.723137
ENSDARG00000003181	sult1st4	5.8202	#N/A	-6.50885	#N/A	-0.999683	#N/A	5.24105	#N/A	-1.80521	#N/A
ENSDARG00000003189	psmd1	-0.535876	0.194646	-0.0109717	0.993266	-0.160729	0.958389	-0.107008	0.900727	0.376623	0.677129
ENSDARG00000003193	rassf7b	4.1218	0.15107	0.678892	0.940003	-4.72396	0.296289	-1.16767	0.830862	-0.529537	0.96445
ENSDARG00000003197	wdr21	1.1711	0.735787	-1.60553	0.752527	-0.910507	0.967287	0.112301	0.983923	-0.461828	0.964896
ENSDARG00000003200	foxm1	-2.23192	0.561297	-6.11232	0.180215	-2.19617	0.828	-2.76808	#N/A	-9.37718	0.0364244
ENSDARG00000003203	rhcga	7.41464	0.0477397	0.12363	0.991034	-0.999736	0.970291	6.83545	#N/A	2.39405	0.811581
ENSDARG00000003205	ngly1	0.224256	0.802148	0.0312561	0.984418	0.500618	0.764649	0.790331	0.364184	0.792495	0.466851
ENSDARG00000003206	chchd6a	-0.838782	0.700457	-0.0315615	0.994676	1.54878	0.69032	0.000150507	0.999917	-0.111638	0.988123
ENSDARG00000003207	mterf3	-0.982337	0.558174	0.0184262	0.996174	1.11428	0.779618	-0.120691	0.967134	-0.865579	0.827577
ENSDARG00000003208	pomk	1.11053	0.370067	0.26298	0.941572	-1.4309	0.501689	-0.514532	0.80964	-0.261739	0.955629
ENSDARG00000003210	si:ch73-86n2.1	7.68705	0.00115278	2.73834	0.279183	-0.999732	0.970291	-2.24166	0.439722	0.124677	0.989119
ENSDARG00000003213	naa15a	-0.916634	0.00086357	-0.0459183	0.971797	0.2713	0.759222	0.163938	0.786232	0.356926	0.584289
ENSDARG00000003216	anxa2a	3.64192	1.74621e-07	1.24115	0.245697	-0.613186	0.84332	1.62729	0.135496	0.509145	0.836086
ENSDARG00000003217	urb2	-2.9298	6.04499e-13	-0.148583	0.922045	1.40096	0.0310957	-0.174418	0.872742	-0.12863	0.9542
ENSDARG00000003219	bin2a	6.99585	0.00452105	3.46739	0.151568	-8.14281	0.00801347	-1.15526	0.751405	2.20354	0.582574
ENSDARG00000003229	gdf9	-0.0199383	#N/A	-0.668713	#N/A	-6.61209	#N/A	-0.599086	#N/A	-1.80521	#N/A
ENSDARG00000003235	nup88	-0.812366	0.295509	-0.090959	0.973393	0.0459724	0.987991	-0.317082	0.82249	-0.621124	0.716095
ENSDARG00000003244	gbp3	1.99928	0.0202178	-0.511423	0.816238	-0.0666802	0.987751	1.99407	0.0969278	0.320065	0.932138
ENSDARG00000003250	pik3cd	-2.07653	0.358246	-0.197861	0.977183	4.59957	0.128813	-0.193905	0.965013	-0.599051	0.94319
ENSDARG00000003251	zbtb22b	-0.039102	0.997826	-1.29004	0.159158	-0.5139	0.842642	-0.560722	0.66188	-1.91262	0.0541292
ENSDARG00000003257	zgc:101559	-2.02947	0.441093	1.34546	0.790574	0.855479	0.966832	-1.93032	#N/A	0.770792	0.933615
ENSDARG00000003259	loxa	2.68176	0.391252	1.33751	0.839544	3.59458	0.660606	-0.553096	#N/A	-2.30321	0.71684
ENSDARG00000003269	clcn3	0.84362	0.00935555	-0.216163	0.784183	-0.165137	0.941624	0.423538	0.442976	0.460488	0.499941
ENSDARG00000003270	dhps	-1.39887	0.0267679	-0.0894187	0.973025	0.504722	0.81795	0.255756	0.857914	0.0694768	0.983213
ENSDARG00000003281	pik3ip1	0.172115	0.925123	0.548251	0.782986	0.368765	0.958875	-0.0959008	0.961354	0.97225	0.612302
ENSDARG00000003287	wdr12	-1.18511	0.12482	-0.400789	0.831739	0.237447	0.970291	-0.281458	0.862631	-0.965259	0.516501
ENSDARG00000003290	dab1b	2.47811	0.127643	-0.616728	0.887051	-2.87866	0.255566	-2.8295	0.186303	-2.4937	0.348398
ENSDARG00000003293	sox9a	0.484988	0.50268	1.0082	0.177281	-1.16894	0.192514	-1.77872	0.0109656	-0.999084	0.301331
ENSDARG00000003303	stc1	-1.41036	#N/A	-0.668719	#N/A	0.390655	#N/A	-5.6267	#N/A	-7.4178	#N/A
ENSDARG00000003307	stx16	0.0236722	0.999251	-0.44377	0.670439	-0.0637569	0.980576	0.218946	0.849582	0.251289	0.906786
ENSDARG00000003308	emc2	0.356211	0.606201	-0.372228	0.733696	-0.308359	0.900542	0.265378	0.799357	-0.425137	0.756525
ENSDARG00000003311	pank2	0.279122	0.742823	0.434486	0.706124	0.795595	0.485404	-0.677602	0.456053	0.531597	0.699262
ENSDARG00000003313	eps8l1b	4.59587	0.243992	2.87677	0.596563	-0.999732	0.970291	-3.55522	#N/A	-0.841482	0.949203
ENSDARG00000003320	fam91a1	0.268281	0.728218	-0.367641	0.744362	0.614247	0.611167	0.534036	0.545008	0.381034	0.804591
ENSDARG00000003326	cacng5a	-0.0199383	#N/A	-0.668713	#N/A	-0.999683	#N/A	-0.599086	#N/A	-5.83271	#N/A
ENSDARG00000003328	slf2	-0.952571	0.120955	0.065529	0.976535	0.397522	0.867358	-0.0668568	0.960843	-0.0487105	0.987335
ENSDARG00000003344	trpc2b	-6.29622	#N/A	-0.668713	#N/A	5.27646	#N/A	-7.74208	#N/A	-6.56978	#N/A
ENSDARG00000003373	commd2	0.360801	0.731541	-0.903683	0.399723	0.583363	0.798137	1.47936	0.130456	0.127741	0.968637
ENSDARG00000003375	gng12a	0.351128	0.77695	-0.554763	0.746664	-0.0428202	0.989536	0.370813	0.82139	-1.49899	0.244265
ENSDARG00000003380	si:dkey-275b16.2	1.08047	0.575965	-0.463145	0.917513	2.51147	0.410033	-0.687937	0.818518	-0.11736	0.987386
ENSDARG00000003381	si:ch211-266g18.6	3.09756	0.22689	1.65305	0.720207	-3.90195	0.323656	-0.132296	#N/A	0.731782	0.938093
ENSDARG00000003382	cwc25	-0.643232	0.477555	0.447733	0.794363	0.0635561	0.985724	-0.44863	0.749391	0.369691	0.894471
ENSDARG00000003383	asb8	1.68694	0.145402	0.196857	0.965844	1.06392	0.734722	0.129099	0.959061	0.481683	0.911094
ENSDARG00000003395	col4a3	7.64792	0.00851387	-8.33658	0.0136863	-8.69029	0.0226468	-1.15526	#N/A	-9.41783	0.0119295
ENSDARG00000003398	rbpja	-0.578968	0.420426	0.399478	0.762927	-0.671643	0.625919	-0.922317	0.299839	-0.510622	0.74017
ENSDARG00000003399	fgf8a	-0.0022755	0.999679	-8.19989	0.0341032	-2.78682	0.704809	1.02999	#N/A	-7.41783	0.124223
ENSDARG00000003403	tenm1	2.0704	9.67735e-06	-0.331402	0.784356	-0.515116	0.734063	-0.979897	0.185598	0.0373627	0.988867
ENSDARG00000003411	foxa2	0.612718	0.912667	3.13738	0.480324	-3.51132	0.54833	-3.44586	0.43261	-0.165672	0.99033
ENSDARG00000003414	capslb	-0.0199383	#N/A	-0.668713	#N/A	-0.999822	#N/A	-0.599225	#N/A	-6.56977	#N/A
ENSDARG00000003420	chrna5	6.17696	0.0789857	-6.86563	0.111974	-7.76429	0.104503	-1.6522	#N/A	-8.70734	0.0594785
ENSDARG00000003421	igf2bp2a	0.971995	0.27293	0.309474	0.890949	0.0237651	0.994191	0.647638	0.648524	-0.428317	0.879181
ENSDARG00000003429	hnrnpdl	0.18327	0.790826	0.0986901	0.950059	-0.0944673	0.970291	-0.430545	0.559282	-0.167938	0.925931
ENSDARG00000003444	dhrs7	-0.352675	0.83684	-0.0860267	0.97834	0.314626	0.970291	-0.453997	0.82938	0.888326	0.74094
ENSDARG00000003446	ippk	0.425871	0.608976	0.386004	0.788737	-0.978465	0.386327	0.445797	0.702047	0.646821	0.651204
ENSDARG00000003449	pde10a	-0.652135	0.39387	0.0313195	0.98701	2.21032	0.00832118	0.728198	0.492484	0.602688	0.704032
ENSDARG00000003462	fech	-4.11982	3.37621e-28	-0.847941	0.155489	2.6943	2.02653e-07	-0.306948	0.7271	0.397762	0.747887
ENSDARG00000003469	neurod4	11.2359	5.58966e-11	-0.290933	0.905983	-12.0198	2.53963e-10	-2.31734	0.0261286	-1.26179	0.402821
ENSDARG00000003475	sult1st5	-0.182784	#N/A	-6.38574	#N/A	-1.1473	#N/A	0.0904277	#N/A	-6.24779	#N/A
ENSDARG00000003486	ppp1caa	-0.305832	0.466112	-0.177644	0.839635	0.00143181	0.99921	-0.208251	0.751095	-0.152387	0.910055
ENSDARG00000003487	nup93	-2.22335	3.41874e-08	-0.115923	0.945195	0.395127	0.787303	-0.845295	0.212263	-0.846205	0.289298
ENSDARG00000003495	madd	1.2444	0.0145072	-0.661417	0.417806	-1.2715	0.100885	-1.08675	0.134465	-1.11927	0.173525
ENSDARG00000003512	anks1b	0.25652	0.685286	-0.582358	0.380238	1.5386	0.00707179	1.02705	0.0819093	0.83968	0.255402
ENSDARG00000003517	impa1	2.94276	0.00437423	-1.5068	0.351061	0.649025	0.914673	1.01234	0.596395	0.852628	0.786708
ENSDARG00000003519	aprt	-1.28357	0.128928	0.563036	0.749459	0.0652201	0.986584	0.120776	0.949834	-0.168495	0.9634
ENSDARG00000003520	tbc1d14	0.825035	0.515536	1.67771	0.201333	0.166586	0.975534	0.331254	0.881338	1.32216	0.501366
ENSDARG00000003523	itln3	-0.0199383	#N/A	-0.668713	#N/A	-0.999683	#N/A	-0.599086	#N/A	-1.80521	#N/A
ENSDARG00000003526	psma5	-0.130479	0.916569	0.121162	0.960895	-0.248726	0.964539	0.74352	0.451962	0.142373	0.959642
ENSDARG00000003527	mak16	-0.576034	0.597451	0.196839	0.946335	0.206394	0.970291	0.246259	0.892593	-0.178399	0.961269
ENSDARG00000003531	tcea1	0.5358	0.31315	-0.251954	0.829465	-0.586884	0.552561	0.0387399	0.971075	-0.268173	0.867085
ENSDARG00000003533	col8a1b	-0.0199387	0.999251	9.4999	0.00301734	-0.999736	0.970291	-4.62673	#N/A	0.461285	0.966157
ENSDARG00000003544	adarb1b	-0.128185	0.942131	0.680953	0.63074	-0.867373	0.622448	-1.67826	0.0984809	-0.33527	0.910961
ENSDARG00000003553	gnrhr2	-0.0199383	#N/A	-0.668713	#N/A	-0.999683	#N/A	-0.599086	#N/A	-1.80521	#N/A
ENSDARG00000003564	dohh	-0.231212	0.961112	-1.78183	0.544956	0.00737872	0.99921	1.78168	0.540701	-1.91039	0.614433
ENSDARG00000003570	hsp90b1	0.0015382	0.999251	0.961708	0.224266	0.672748	0.618108	-0.788976	0.389929	-0.379957	0.836972
ENSDARG00000003573	dctn5	1.3435	0.101062	-0.709644	0.630708	0.875236	0.661699	1.54618	0.168699	0.376267	0.904349
ENSDARG00000003576	klhl32	2.61093	0.01586	-0.361638	0.914184	1.3862	0.642798	1.97711	0.226221	0.968418	0.740931
ENSDARG00000003584	pla2g7	1.13569	0.0562348	-0.193719	0.912943	0.0241115	0.992303	1.48844	0.0602763	0.830347	0.481004
ENSDARG00000003592	surf1	-0.194439	0.959491	-0.565783	0.88938	-0.00522352	0.99921	0.102245	0.975749	-0.0988192	0.989119
ENSDARG00000003599	rpl3	-0.348444	0.206603	0.247544	0.579804	0.140649	0.915783	0.789103	0.0109803	0.760207	0.0249937
ENSDARG00000003607	nr2f6a	-0.17892	0.841185	-0.103033	0.961447	-0.561148	0.660499	-0.24905	0.8171	1.12825	0.169214
ENSDARG00000003615	slc26a3.2	-1.77708	0.621913	2.1027	0.694019	2.67003	0.71233	3.31349	#N/A	3.87877	0.481311
ENSDARG00000003616	arih1	-0.503702	0.496822	0.128329	0.954225	0.285412	0.940424	-0.437426	0.689375	-0.474391	0.76736
ENSDARG00000003631	clockb	0.010884	0.999251	0.121889	0.938737	-0.233514	0.935976	-0.744168	0.285235	-1.10706	0.108344
ENSDARG00000003632	zgc:172270	6.47868	#N/A	-7.16733	#N/A	-0.999683	#N/A	5.89953	#N/A	-1.80521	#N/A
ENSDARG00000003635	mogat3b	-1.42378	0.367053	1.63075	0.435921	1.00533	0.834702	-1.29335	0.572296	0.554855	0.918908
ENSDARG00000003641	tfg	0.546251	0.327444	-0.668114	0.344026	-0.0416437	0.985753	0.866125	0.213526	0.00479352	0.998582
ENSDARG00000003642	zfyve19	0.495613	0.502811	0.583343	0.563836	0.306734	0.931426	3.46682	2.43619e-06	1.73829	0.0354158
ENSDARG00000003655	tmem59l	2.4861	3.09005e-07	-0.648234	0.456679	-0.42576	0.843386	-0.644116	0.468225	0.795657	0.466266
ENSDARG00000003675	cryl1	0.750914	0.261983	-0.577512	0.584037	1.56207	0.0779344	7.03122	2.09822e-10	1.91627	0.0224363
ENSDARG00000003680	runx1t1	0.228341	0.661796	-1.08595	0.0066469	0.676309	0.284765	-0.975863	0.040847	-0.966394	0.0699129
ENSDARG00000003681	eif5	-1.23627	9.67631e-05	0.450538	0.410087	0.888295	0.0808948	0.310466	0.623702	0.793652	0.143871
ENSDARG00000003684	obsl1a	1.31038	0.434299	-1.47139	0.522941	1.60182	0.613092	4.96502	0.00288939	2.43682	0.304465
ENSDARG00000003693	hars	-2.01317	6.09239e-05	0.717933	0.408367	1.06476	0.24919	-0.130028	0.921439	1.00895	0.30333
ENSDARG00000003695	vdac3	2.41719	2.57011e-14	-0.241768	0.782095	-0.600157	0.392085	1.3859	0.00193757	1.112	0.0313616
ENSDARG00000003697	slc5a8l	-4.447	0.324154	-0.668723	0.970927	-2.82264	0.797079	-6.04174	#N/A	-6.56983	0.304465
ENSDARG00000003699	atp7a	0.898502	0.0512707	-1.0055	0.0694955	0.601878	0.54147	1.91658	0.000337032	0.614255	0.509901
ENSDARG00000003701	cldng	-6.76638	0.480239	3.81652	0.852285	4.30036	0.914673	-4.04541	#N/A	6.2611	0.772979
ENSDARG00000003705	prnprs3	1.65093	2.08441e-09	-0.6524	0.100326	0.191013	0.911195	1.06327	0.0070075	0.92016	0.0439865
ENSDARG00000003706	ryr2b	1.16728	0.315903	-0.968991	0.592416	4.59843	0.00019266	7.18627	1.41419e-10	4.19985	0.000797549
ENSDARG00000003732	mitfa	4.28555	1.27468e-10	-2.02079	0.0212514	-0.899818	0.625919	7.3506	1.11398e-15	10.82	4.68451e-05
ENSDARG00000003749	polb	0.345158	0.791953	0.359591	0.875141	-0.854334	0.678031	-0.9043	0.50531	0.189599	0.960176
ENSDARG00000003750	pfas	4.39329	5.34669e-32	-1.40649	0.00381144	-0.263092	0.912599	6.45169	3.312e-43	4.49889	3.19959e-20
ENSDARG00000003751	lats1	-0.975351	0.206997	-0.970076	0.355727	0.123788	0.974199	-0.302854	0.839835	-0.720928	0.666115
ENSDARG00000003754	tspan2a	-2.71515	0.0120693	-0.0547757	0.987478	1.82824	0.370214	-0.942575	0.645262	-1.50888	0.501685
ENSDARG00000003757	cnpy1	0.465961	0.598383	0.996426	0.27698	-0.234681	0.970291	1.03034	0.312716	0.499679	0.78932
ENSDARG00000003769	tada2b	-0.829966	0.350543	0.386443	0.846215	0.284322	0.970291	-1.08253	0.357899	-0.0396423	0.991248
ENSDARG00000003776	pip4k2aa	-1.14229	0.0867455	-0.205913	0.918252	1.71478	0.0618492	-0.0658573	0.965013	-0.349348	0.884581
ENSDARG00000003779	ctnnd2b	2.10444	0.000657336	0.552894	0.674272	-4.07579	8.30912e-08	-2.07352	0.012013	0.176915	0.95345
ENSDARG00000003789	dennd5b	0.612859	0.362247	0.227862	0.889427	-1.84932	0.0121288	-1.22263	0.114447	-0.247318	0.912944
ENSDARG00000003795	idh2	0.548909	0.193464	0.202187	0.840767	-0.619638	0.379274	0.435166	0.496857	0.38415	0.677129
ENSDARG00000003797	asb2a.1	0.128935	0.999251	0.0919244	0.993035	2.1355	0.875689	0.100044	#N/A	1.23949	0.924035
ENSDARG00000003803		7.84084	0.000605885	0.377416	0.95347	-6.90181	0.0250189	-2.33073	0.384116	-1.84879	0.62859
ENSDARG00000003808	aqp3a	5.34103	1.75616e-18	0.857253	0.460926	-0.538852	0.845484	4.26938	6.21797e-08	2.88512	0.0012916
ENSDARG00000003811	plxnb2a	-0.718898	0.0555702	-0.1826	0.855862	-0.174696	0.94613	-0.531798	0.360794	-1.26656	0.00855619
ENSDARG00000003818	prkag1	-0.652848	0.373164	-0.030968	0.986913	1.41092	0.130571	0.218624	0.873799	0.00289408	0.999155
ENSDARG00000003820	nr1d2a	3.81534	4.73045e-22	-0.229817	0.851076	0.563917	0.69101	0.443564	0.575232	-0.229359	0.89869
ENSDARG00000003822	ankrd16	0.244249	0.925757	0.345757	0.930031	0.797423	0.883764	0.703233	0.772208	1.74859	0.470324
ENSDARG00000003827	snapc1b	-1.81874	0.153617	1.10667	0.614831	1.17935	0.708923	-0.146687	0.958485	0.232214	0.965747
ENSDARG00000003829	galnt2	0.3523	0.559279	-0.21022	0.867415	-0.618867	0.515619	0.0968743	0.927228	-0.415151	0.723062
ENSDARG00000003835	stom	2.44584	4.07262e-11	-0.283426	0.777462	0.413895	0.734821	3.02166	5.68981e-11	1.79432	0.000773305
ENSDARG00000003841	usb1	0.0612383	0.999251	0.231927	0.963602	-0.134464	0.982381	-0.180605	0.949834	-0.175771	0.975798
ENSDARG00000003845	chm	-0.701875	0.460686	0.0720062	0.978057	1.20917	0.398636	-0.34576	0.830017	0.428863	0.878653
ENSDARG00000003846	mrpl21	-0.503575	0.639167	0.316728	0.886979	1.32838	0.341141	-0.31614	0.851183	0.639004	0.765902
ENSDARG00000003854	acsl1b	-0.819862	0.297429	-0.270463	0.892357	1.28447	0.258565	0.689973	0.556964	-0.237505	0.935483
ENSDARG00000003860	cbx3a	-1.2621	0.00775842	0.559747	0.495703	0.0266689	0.989536	-0.350497	0.712582	0.216956	0.913141
ENSDARG00000003865	pard6b	-1.07626	0.620886	1.23894	0.705496	0.654537	0.964539	-0.698604	#N/A	1.10244	0.823633
ENSDARG00000003866	tm9sf2	0.399077	0.350874	0.10844	0.924621	-0.225962	0.893872	0.381779	0.534707	0.589134	0.369949
ENSDARG00000003867	cdk20	8.43775	0.0147164	-0.182257	0.983529	-7.14281	0.186603	-0.138643	#N/A	-0.161727	0.991248
ENSDARG00000003869	decr1	-0.124148	0.945191	0.745253	0.579414	-0.0117228	0.997339	0.832169	0.518653	0.216867	0.948935
ENSDARG00000003872	ccdc102a	-0.224728	0.822055	0.536357	0.637543	-0.478611	0.814091	-1.04832	0.231171	-0.647161	0.634629
ENSDARG00000003877	pbrm1	1.29473	0.17638	-0.364786	0.883834	0.11127	0.979679	-1.28993	0.339967	-0.634152	0.808371
ENSDARG00000003899	zdhhc23b	0.573209	0.727531	-0.397484	0.903884	0.29215	0.970291	0.613487	0.781556	0.493014	0.912405
ENSDARG00000003900	gpr61l	-6.888	#N/A	-0.668722	#N/A	0.840734	#N/A	-5.84911	#N/A	-1.80528	#N/A
ENSDARG00000003902	ctsl.1	10.1614	2.88681e-09	2.2354	0.00754299	-0.999718	0.970291	2.2327	0.0332335	3.62811	0.000159924
ENSDARG00000003903	hapln2	-0.0199383	#N/A	-0.668713	#N/A	-0.999754	#N/A	-0.599157	#N/A	-5.83277	#N/A
ENSDARG00000003904	sycp1	3.24543	#N/A	-3.93409	#N/A	-5.44234	#N/A	-3.94624	#N/A	-7.70728	#N/A
ENSDARG00000003909	ftr01	-0.0199383	#N/A	-0.668713	#N/A	-0.999808	#N/A	-0.599211	#N/A	-1.80534	#N/A
ENSDARG00000003910	med13b	-0.294381	0.643713	-0.154436	0.911312	-0.701981	0.413032	-0.803727	0.226074	-0.407897	0.728332
ENSDARG00000003920	setb	-1.58044	1.10188e-10	0.688465	0.0403894	0.139159	0.940685	-0.692292	0.0696838	0.340754	0.582104
ENSDARG00000003925	cx28.6	-0.0199383	#N/A	-0.668713	#N/A	-0.999683	#N/A	-5.36353	#N/A	-1.80521	#N/A
ENSDARG00000003927	cldn12	-1.21888	0.0289691	-0.0328282	0.984112	0.336408	0.905214	-0.119777	0.927309	-0.441672	0.783865
ENSDARG00000003931	cndp2	3.6915	5.26216e-17	-1.50621	0.00844568	1.63847	0.0271346	4.96392	2.09644e-19	2.64509	2.43297e-05
ENSDARG00000003934	nxnl2	-0.243946	0.946668	0.750829	0.852245	0.799797	0.928874	0.136869	#N/A	0.978295	0.842238
ENSDARG00000003938	rpa1	-3.26421	4.98672e-21	1.39319	0.00148995	0.560684	0.514989	-1.07764	0.0496703	-0.0301097	0.988759
ENSDARG00000003940	mtfr1l	-0.744479	0.299094	0.461084	0.727496	-0.395447	0.887705	-0.664489	0.526552	0.0158904	0.996509
ENSDARG00000003941	rrs1	-1.4714	0.172085	1.16383	0.468658	0.173999	0.974509	-0.492421	0.811858	-0.505025	0.895238
ENSDARG00000003944	nmur1b	6.56464	#N/A	-7.25329	#N/A	-0.999683	#N/A	5.98549	#N/A	-1.80521	#N/A
ENSDARG00000003952	pfn2	2.95211	3.49047e-14	-0.205094	0.87474	-0.545807	0.608441	2.72236	5.14172e-08	2.39125	7.91527e-06
ENSDARG00000003961	parp3	0.559656	0.658018	-0.284483	0.918296	2.25549	0.108905	1.62689	0.218469	0.487781	0.884581
ENSDARG00000003963	traf4a	-0.741903	0.481418	0.488508	0.814582	-0.216799	0.970291	-1.65181	0.161063	-0.972242	0.591712
ENSDARG00000003965	tlx1	-2.16816	0.501756	-0.847295	0.912629	2.91712	0.622662	2.20513	0.631163	0.498479	0.965697
ENSDARG00000003968	larp6b	-0.0199383	#N/A	-0.668713	#N/A	-0.999683	#N/A	-0.599086	#N/A	-1.80521	#N/A
ENSDARG00000003970	trim35-13	-0.286822	0.997155	2.66245	0.835327	-0.915256	#N/A	5.24601	#N/A	7.37104	0.48478
ENSDARG00000003971	isl2a	-1.08612	0.566369	-1.70846	0.459375	2.70949	0.257108	0.0439172	0.988905	-1.20198	0.755313
ENSDARG00000003973	chordc1a	0.601607	0.626005	-0.0596798	0.981482	1.77632	0.253448	1.89159	0.138272	1.14247	0.550345
ENSDARG00000003974	spoplb	0.10314	0.935028	-0.26745	0.859552	0.393228	0.859537	-0.130385	0.919965	-0.421645	0.794337
ENSDARG00000003977	zgc:153896	0.332268	0.967458	-7.77682	0.0460706	0.991587	0.970291	6.50898	#N/A	-7.05527	0.147057
ENSDARG00000003984	si:dkey-175g6.5	-0.734641	0.0863595	-0.0683185	0.969849	0.148528	0.970291	0.0314763	0.975076	0.198314	0.905316
ENSDARG00000003989	crhr1	0.951988	0.508969	1.48074	0.371116	0.499365	0.964539	-2.16151	0.162029	-0.594172	0.882351
ENSDARG00000003991	fhl2b	6.00224	0.50565	2.07579	0.92292	-0.999687	#N/A	5.42309	#N/A	3.51888	0.894113
ENSDARG00000003994	syt9a	4.97804	0.173012	1.66998	0.812152	-0.999736	0.970291	-4.04377	#N/A	3.08874	0.684241
ENSDARG00000003998	phyhipla	0.296129	0.970653	3.61177	0.331627	-2.1955	0.785258	-4.11624	#N/A	3.18048	0.567265
ENSDARG00000004015	adcyap1a	-0.553521	0.978153	-6.62514	0.497557	5.49022	0.751075	0.10733	#N/A	-1.80532	0.947921
ENSDARG00000004017	spag1a	0.455362	0.661065	-0.234841	0.917094	0.423195	0.915041	0.232439	0.887683	0.488361	0.837478
ENSDARG00000004018	si:ch211-236h17.3	0.680462	0.583021	-0.60564	0.776942	0.178319	0.973032	1.70997	0.212307	0.207814	0.961269
ENSDARG00000004023	isl1	2.42351	0.00015563	-0.102874	0.972431	-2.50719	0.00525913	-1.75977	0.0514012	-1.76129	0.0780446
ENSDARG00000004034	arhgdig	-1.12981	0.167658	0.903263	0.458101	1.01467	0.524235	-0.857779	0.495447	-0.164223	0.961638
ENSDARG00000004037	cog2	0.828063	0.42821	-0.120472	0.972815	-0.642884	0.833964	0.0395305	0.984749	0.769229	0.728189
ENSDARG00000004046	phf6	-0.994313	0.222556	0.569958	0.707293	-0.254932	0.970291	-0.754103	0.547145	0.0551887	0.988123
ENSDARG00000004049	marcksa	0.156432	0.955361	-1.05341	0.580782	-0.669098	0.89089	-1.26148	0.469512	-1.06262	0.677129
ENSDARG00000004051		-11.7427	7.50183e-05	7.07658	0.0817031	10.7231	0.0199812	-6.21168	0.165982	0.327473	0.98019
ENSDARG00000004055	uhrf1bp1l	-0.599537	0.351072	-0.675108	0.432651	0.838923	0.419867	-0.113673	0.928409	-0.645338	0.587369
ENSDARG00000004059	galk2	2.65234	0.127418	-0.0987348	0.983173	0.277289	0.975534	2.4173	0.346669	2.00352	0.571673
ENSDARG00000004060	bhlhe40	3.04254	5.82433e-13	0.864907	0.188091	-0.947206	0.25656	3.09239	1.23362e-08	2.81535	6.82911e-07
ENSDARG00000004074	bach2b	1.63097	2.37824e-05	-0.166838	0.893989	-2.22204	9.69298e-06	-2.13034	6.38529e-06	-0.831151	0.237873
ENSDARG00000004078	acsl4a	-0.395585	0.620187	-0.41277	0.747524	0.0256729	0.991523	-1.25579	0.115151	-0.705343	0.572766
ENSDARG00000004082	cx39.9	5.87905	#N/A	-6.5677	#N/A	-7.44214	#N/A	5.2999	#N/A	-1.80521	#N/A
ENSDARG00000004094	acsbg2	-1.38358	0.00129453	-0.0533461	0.976445	0.739491	0.38998	-1.05844	0.0921608	-0.0720382	0.973516
ENSDARG00000004105	tie1	-3.63709	1.69429e-09	0.694211	0.581944	2.45192	0.00629016	-0.183018	0.909983	1.79378	0.0885309
ENSDARG00000004111	esr1	-3.4232	0.206975	1.08729	0.875864	1.63627	0.874603	2.44095	#N/A	0.405854	0.971865
ENSDARG00000004114	tti1	-2.54528	0.00297615	0.924996	0.568648	-0.152011	0.975504	-1.78263	0.170326	-0.395068	0.914745
ENSDARG00000004115	mgat4b	1.76316	0.0557194	-0.972709	0.526622	-0.412402	0.951776	1.59073	0.235737	-0.109931	0.980117
ENSDARG00000004130	mvk	-0.384916	0.951751	0.423323	0.968984	1.21071	0.943534	0.29526	#N/A	0.717202	0.949258
ENSDARG00000004131	rttn	-3.13383	0.000255479	0.969314	0.556661	0.306856	0.970291	-1.67531	0.223947	-0.607941	0.842823
ENSDARG00000004132	usp19	0.216301	0.664542	-0.971197	0.0125421	0.134186	0.970291	-0.423209	0.460987	-0.683538	0.240233
ENSDARG00000004141	zgc:92630	-0.628179	0.830422	0.614456	0.906287	-0.216214	0.979679	-0.0912668	#N/A	-1.23663	0.810662
ENSDARG00000004150	grm2a	7.66384	0.0107325	-1.17251	0.867415	-3.4424	0.680517	-1.98732	#N/A	-1.87526	0.800695
ENSDARG00000004151	rab23	-1.02229	0.691851	-1.07031	0.805244	0.893259	0.934349	0.521003	0.897789	-0.655026	0.930859
ENSDARG00000004154	orai1b	0.478739	0.776999	0.228804	0.954944	-1.00199	0.738711	1.84072	0.256418	1.9106	0.319437
ENSDARG00000004158	tmem63c	4.16577	0.0112632	-9.01418	0.000214365	-4.08998	0.0940519	-2.00008	0.424163	-9.77148	0.00016465
ENSDARG00000004160	reep3b	-0.349017	0.73756	0.500239	0.735509	0.0366889	0.989644	0.234917	0.87872	0.691537	0.676339
ENSDARG00000004161	ik	0.22406	0.753869	0.443824	0.598331	0.0987355	0.970305	0.202174	0.838521	1.42827	0.0251923
ENSDARG00000004167	zgc:110366	2.60138	0.244656	-0.627549	0.918521	-1.03113	0.931319	1.24714	0.746551	1.25208	0.848377
ENSDARG00000004169	stmn1a	-0.00997908	0.999251	1.30228	0.0585147	-1.81959	0.0162594	-0.954915	0.26275	-0.780761	0.491682
ENSDARG00000004171	rabac1	0.63289	0.476742	0.0342265	0.987478	1.43591	0.226988	1.17288	0.26989	0.843706	0.584236
ENSDARG00000004173	copa	0.0445005	0.965609	-0.700299	0.123434	0.109801	0.970291	0.137384	0.861773	-0.739663	0.192895
ENSDARG00000004174	cnot1	-0.785465	0.022503	-0.300183	0.65958	-0.479306	0.505869	-0.805444	0.0893176	-0.83728	0.111018
ENSDARG00000004176	ulk4	-1.749	0.36018	1.22627	0.717602	-0.277915	0.974911	-1.72835	0.523801	0.200311	0.979442
ENSDARG00000004177	fam169ab	4.32211	1.06979e-09	-0.28473	0.90538	-0.641556	0.839017	3.83807	5.17e-05	0.582947	0.805223
ENSDARG00000004184	nf1b	0.947327	0.0303295	-0.454665	0.553535	-0.714048	0.379241	0.461867	0.539501	-0.209098	0.905209
ENSDARG00000004187	zgc:122979	6.84626	0.00197451	1.34195	0.644758	-5.02734	0.149758	-1.63499	0.523502	2.30702	0.468388
ENSDARG00000004189	cbx1a	-0.84189	0.0670122	0.24181	0.836143	-0.47511	0.67413	-0.542928	0.462915	-0.538783	0.577877
ENSDARG00000004196	tnfsf10l	0.464533	0.47552	-0.395025	0.713826	-1.22371	0.110779	-0.0467126	0.968802	-1.96852	0.00224393
ENSDARG00000004199	spam1	-0.0199383	#N/A	-0.668713	#N/A	-5.44221	#N/A	-5.62655	#N/A	-1.80521	#N/A
ENSDARG00000004204	efhc2	-0.989938	0.89606	-4.28168	0.573427	-2.02932	#N/A	-5.04347	#N/A	-1.80527	0.924734
ENSDARG00000004211	ccdc106a	0.791969	0.38931	0.279538	0.903134	-1.20126	0.399551	-0.441908	0.769572	0.0302091	0.994428
ENSDARG00000004218	rnd1b	1.51069	0.0844398	-0.92303	0.514047	-2.33766	0.0459393	-0.315998	0.865225	0.382736	0.911928
ENSDARG00000004219	slc6a3	-0.0199386	0.999251	4.50179	0.492927	-5.7643	0.438039	-4.04177	#N/A	-1.39932	0.925931
ENSDARG00000004227	pde3a	1.70782	0.0577571	-0.299805	0.911356	-1.32112	0.440533	0.202391	0.922258	-0.733504	0.758659
ENSDARG00000004232	dlb	4.29112	1.11851e-07	-0.780255	0.644474	-6.62572	6.65525e-11	-1.84124	0.132544	-1.44612	0.362581
ENSDARG00000004243	asic4b	-0.0199384	0.999251	-0.668714	0.97834	-7.90159	#N/A	-7.04157	#N/A	-1.80521	0.959642
ENSDARG00000004246	slit2	1.43631	0.00794916	-0.10254	0.966458	-2.14248	0.00236326	-1.01867	0.211968	-1.77683	0.0177488
ENSDARG00000004251	dhfr	-1.72118	0.200159	-0.371902	0.92292	-0.118749	0.984803	0.0482238	0.986284	-0.883479	0.810187
ENSDARG00000004256	wnt11	-0.279661	0.978433	-8.2831	0.0357138	0.183813	0.988464	-0.636819	#N/A	-7.05527	0.16385
ENSDARG00000004260	cul5b	4.83289	0.201421	-5.52155	0.24682	-6.44237	0.221938	-4.88935	#N/A	-9.05526	0.0452498
ENSDARG00000004261	tmed9	0.679547	0.225858	0.156669	0.921348	-0.0432111	0.985779	0.778016	0.311599	1.02808	0.204315
ENSDARG00000004262	cyp46a1.2	-1.74956	0.187208	0.0940689	0.979053	4.42772	0.0140469	0.61329	0.811123	0.169926	0.977224
ENSDARG00000004270	atl3	3.64299	4.7821e-19	-0.318944	0.775036	0.575656	0.636295	3.927	3.94561e-14	2.09424	0.000453671
ENSDARG00000004274	zgc:112496	-0.693492	0.80832	0.0297413	0.995446	0.574237	0.970291	0.51075	0.89848	-0.669365	0.927823
ENSDARG00000004280	seh1l	-0.719894	0.241758	0.261659	0.86043	0.0692507	0.979679	-0.369713	0.725867	0.280815	0.895288
ENSDARG00000004282	zgc:77375	1.23314	0.0620724	0.213554	0.913632	1.01396	0.434636	0.500751	0.678985	1.47178	0.145494
ENSDARG00000004291	hecw1b	4.46222	9.46676e-06	0.173499	0.968781	-4.03069	0.00402426	-2.93115	0.0246541	-1.20434	0.587369
ENSDARG00000004296	ambp	5.49456	0.0278559	5.64454	0.00223232	-4.44239	0.296595	4.91541	0.215402	1.99488	0.588324
ENSDARG00000004297	irf2bpl	0.81944	0.0788485	0.55959	0.432051	-0.90509	0.215698	-0.928294	0.140613	0.154661	0.936716
ENSDARG00000004301	rhogb	1.02113	0.104827	-0.529301	0.644862	2.17517	0.00687382	4.19004	9.39111e-10	1.40405	0.130894
ENSDARG00000004302	slc45a1	8.78546	0.000135282	-1.24239	0.753537	-8.86864	0.00214448	-2.16116	0.453999	-1.06058	0.864065
ENSDARG00000004305	vangl1	-1.44398	0.122741	1.56414	0.183153	1.99056	0.171294	-2.4554	0.0296401	0.841837	0.703371
ENSDARG00000004306	klhl18	1.50898	0.143594	-1.3965	0.316995	-0.415242	0.959204	0.875174	0.609591	0.381816	0.926523
ENSDARG00000004307	lypd6	0.749778	0.543191	-1.28264	0.366685	1.18007	0.589217	0.571167	0.759	-0.304612	0.941543
ENSDARG00000004308	fam8a1b	-1.56264	0.0549526	1.69134	0.0887991	0.354877	0.953594	-0.169079	0.9285	1.52844	0.263467
ENSDARG00000004311	ldlrap1a	1.85269	0.0961419	-1.30888	0.438727	1.38518	0.568288	2.1845	0.147953	0.839079	0.785249
ENSDARG00000004318	cbwd	2.26035	0.313142	-1.07115	0.827402	0.761346	0.970291	1.95683	0.55462	-0.367958	0.96644
ENSDARG00000004322	ush1ga	7.05168	0.0559565	-1.31984	0.883834	-0.999722	#N/A	-0.362447	#N/A	-1.82741	0.870736
ENSDARG00000004325	casp9	0.666483	0.806802	-2.44852	0.312735	-0.148924	0.985696	1.1132	0.7298	-0.503522	0.947921
ENSDARG00000004328	si:ch1073-284b18.2	-3.38725	0.296709	-6.66161	0.118178	-0.636749	0.970291	-2.00306	#N/A	-7.41783	0.125599
ENSDARG00000004336	exoc4	-0.80988	0.150002	0.156899	0.924913	0.973548	0.269121	-0.0608132	0.960405	0.138915	0.954044
ENSDARG00000004343	nelfe	-0.0470223	0.995569	0.633311	0.675935	0.480055	0.894309	0.109047	0.951684	0.793668	0.66045
ENSDARG00000004358	gnb3a	10.7557	7.76162e-11	1.78761	0.00770229	-6.24973	0.00371108	-2.42853	0.000730684	0.566181	0.715816
ENSDARG00000004363	lhfpl6	-0.012872	0.999251	-0.199483	0.960041	-0.181608	0.97327	-0.2145	0.925183	-1.34734	0.485713
ENSDARG00000004372	fmnl3	-2.85053	1.17994e-06	0.201769	0.923936	1.28826	0.23837	-1.03184	0.312716	-1.77016	0.0639282
ENSDARG00000004377	ppp1r13ba	-0.957458	0.0994182	-0.357944	0.784085	1.47062	0.0645301	2.38207	0.000336689	1.17288	0.197205
ENSDARG00000004378	yrk	-4.98471	1.09445e-22	2.17053	0.000615133	2.35197	0.00160631	-0.747777	0.46893	2.43421	0.00368527
ENSDARG00000004386	si:dkey-153k10.9	1.97144	0.122293	0.564677	0.861742	-3.36733	0.0414324	-2.96903	0.057436	-1.24292	0.652104
ENSDARG00000004392	hdr	-6.22997	2.37538e-21	-9.28957	1.30232e-06	2.92089	0.00270301	-2.78724	0.00345292	-9.73977	4.08375e-07
ENSDARG00000004396	b3gnt5b	-4.02528	0.231071	2.26222	0.722558	3.67075	0.594902	-0.781967	#N/A	-0.209173	0.989119
ENSDARG00000004402	elovl6	1.22478	0.28661	0.1337	0.973393	-0.879671	0.777263	-1.8319	0.19845	-0.375036	0.928775
ENSDARG00000004405	snx10a	1.50457	#N/A	1.2486	#N/A	3.21474	#N/A	5.13985	#N/A	5.85104	#N/A
ENSDARG00000004406	spra	0.402868	0.801127	-1.11	0.494083	-0.534419	0.923406	0.325996	0.882861	-1.49759	0.416334
ENSDARG00000004415	tcf7l2	1.92588	1.66144e-06	-0.796613	0.184311	-2.31669	1.32733e-05	-2.03181	6.45503e-05	-1.96712	0.000301155
ENSDARG00000004427	dpy30	0.522547	0.745813	-0.573483	0.832926	-0.538335	0.933604	0.262746	0.914059	0.527338	0.900321
ENSDARG00000004433	btk	-4.43785	0.000422318	2.19579	0.254008	2.92164	0.174703	0.957445	0.724783	4.6158	0.0258948
ENSDARG00000004436	fam92a1	1.52096	0.170914	-0.808561	0.700335	-1.17816	0.624317	0.708488	0.718582	0.813873	0.781198
ENSDARG00000004445	grm5a	-0.0199387	0.999251	4.85101	0.32864	-0.999725	0.970291	-7.62671	#N/A	-1.31314	0.909588
ENSDARG00000004447	aplnr2	-0.730739	0.648818	0.68184	0.808603	0.643766	0.917319	-1.35572	0.468587	1.47799	0.548522
ENSDARG00000004451	tnfrsfa	1.35412	0.00325518	0.0190344	0.990719	0.811332	0.375244	2.38897	2.0054e-05	1.7178	0.00755208
ENSDARG00000004452	tardbpl	-0.164397	0.784032	-0.433041	0.479076	-0.303652	0.808177	-0.610925	0.276016	-0.302221	0.77172
ENSDARG00000004455	p2rx5	3.58605	0.306245	-0.561784	0.962507	-3.43275	0.624999	-0.504149	#N/A	-0.814871	0.949258
ENSDARG00000004459	unc119.2	-5.79032	#N/A	-0.668713	#N/A	-1.37221	#N/A	-0.599086	#N/A	-7.83264	#N/A
ENSDARG00000004460	desi2	0.18757	0.923577	-0.165875	0.966932	-1.15851	0.564687	-0.890016	0.574283	0.228174	0.956686
ENSDARG00000004470	prkcsh	0.431628	0.290293	0.418461	0.461515	0.0579423	0.975534	0.0176285	0.983923	0.645299	0.290396
ENSDARG00000004472	atat1	-0.795973	0.568422	1.79504	0.201863	-1.27666	0.583508	-3.01773	0.0220033	0.276221	0.95345
ENSDARG00000004473	tbx21	6.93652	0.135082	1.34844	0.911109	-7.34924	0.317799	-1.21455	#N/A	1.14076	0.948901
ENSDARG00000004492	pcyt1ab	-0.0155124	0.999251	-0.280401	0.898729	0.803151	0.664196	-0.104966	0.951684	-0.0246802	0.995691
ENSDARG00000004497	tspan33a	0.518757	0.868544	1.85237	0.521949	-1.22403	0.854473	-0.436723	0.912436	0.177773	0.983488
ENSDARG00000004498	xkr8.1	-0.0199383	#N/A	-0.668713	#N/A	-0.999775	#N/A	-0.599178	#N/A	-8.15463	#N/A
ENSDARG00000004502	rcor3	0.353176	0.799608	-1.05777	0.435552	-1.1763	0.501906	-1.47486	0.239049	-0.644142	0.798011
ENSDARG00000004517	ppat	3.37368	1.21475e-07	-1.67192	0.0552045	-0.401504	0.921876	6.39273	2.19837e-15	2.83379	0.00259812
ENSDARG00000004525	zgc:63882	-0.473455	0.650877	-0.0126448	0.995446	0.695495	0.746804	0.750652	0.561841	1.02	0.50746
ENSDARG00000004527	pin4	0.107835	0.998347	-0.918454	0.865583	-0.493423	0.970291	0.29022	0.950246	-1.51525	0.786708
ENSDARG00000004529	zgc:173742	0.986135	0.928632	1.1927	0.948028	3.95111	#N/A	-0.785244	#N/A	0.570456	0.981063
ENSDARG00000004537	kmt2a	-0.339543	0.439493	-0.806217	0.0598573	-0.890198	0.0833713	-1.51324	0.000217057	-1.76589	2.28685e-05
ENSDARG00000004539	ptgs2a	1.28319	0.480102	1.67955	0.468172	-1.92551	0.522122	-0.420098	0.897789	0.261388	0.967976
ENSDARG00000004561	prkcg	5.14427	0.488036	2.83514	0.848303	-0.999732	0.975534	4.56508	#N/A	6.8628	0.595912
ENSDARG00000004574	gtf3c2	-1.88705	0.14584	-0.126534	0.977183	0.343483	0.970291	-1.73222	0.360682	-1.15227	0.6995
ENSDARG00000004576	plk4	-2.58629	0.0015771	-0.523946	0.813247	-0.498621	0.914264	-2.12695	0.069772	-2.02819	0.133069
ENSDARG00000004577	zgc:194665	1.82247	0.653949	-7.45296	0.0686288	-3.40742	0.603697	-1.30191	#N/A	-8.33537	0.0709105
ENSDARG00000004580	nmnat2	7.20851	0.00404598	0.418253	0.954944	-6.9018	0.0428856	-3.5344	0.20504	-0.932487	0.903407
ENSDARG00000004581	sel1l	0.493833	0.606694	-0.199848	0.930517	-0.119481	0.975504	0.387834	0.784812	0.376377	0.887721
ENSDARG00000004586	ntrk1	-0.194592	0.985723	-7.70457	0.0226716	-0.401792	0.97513	-1.21536	#N/A	-7.83288	0.0451759
ENSDARG00000004587	kat5a	-0.91817	0.231071	0.871242	0.412363	0.171045	0.970291	-1.31717	0.17736	0.403658	0.867085
ENSDARG00000004588	sox4a	1.75596	6.08119e-06	-0.15935	0.903884	-0.779013	0.304607	-1.4267	0.00795076	-0.56433	0.529843
ENSDARG00000004592	gpr22a	-0.263073	0.961289	1.32361	0.759839	0.0383063	0.996348	-1.13981	#N/A	0.329891	0.970947
ENSDARG00000004594	znf800a	-0.549055	0.504157	-0.0319437	0.986913	-0.401732	0.892496	-0.569763	0.620236	-0.337191	0.890345
ENSDARG00000004597	lrrc4ba	4.52133	0.00157397	-1.1912	0.675935	-3.64198	0.105134	-1.26946	0.619312	-0.832085	0.87117
ENSDARG00000004616	mtmr2	1.10851	0.195443	-0.379692	0.856653	-0.0159095	0.99634	2.24434	0.0256552	2.27063	0.0398683
ENSDARG00000004618	stx2a	2.07512	0.0584252	0.977332	0.610438	-2.07195	0.243105	1.2497	0.483066	0.341675	0.940272
ENSDARG00000004621	gpm6ab	4.54291	1.23765e-15	-0.114497	0.968781	-1.55925	0.12701	-0.148993	0.923227	0.997875	0.428029
ENSDARG00000004627	panx3	-0.0199385	0.999251	-0.668719	0.976535	-0.999781	0.975492	-8.84905	#N/A	-9.7714	0.301728
ENSDARG00000004632	egln1b	-1.65063	0.197182	0.990214	0.662219	2.55081	0.168255	0.121419	0.964234	1.39911	0.583324
ENSDARG00000004633	epn3b	6.90253	0.101868	-7.59119	0.14683	-7.69027	#N/A	-0.763108	#N/A	-6.2479	0.388396
ENSDARG00000004634	osbp	0.170236	0.797422	0.191897	0.864825	0.474655	0.624317	0.350578	0.637601	0.0756403	0.967396
ENSDARG00000004635	epha7	-0.58934	0.437648	-0.767045	0.429172	-0.328648	0.925428	0.108141	0.940264	-0.743204	0.573616
ENSDARG00000004636	ccdc9	-0.577674	0.627572	-0.18518	0.955558	0.177063	0.970944	-0.246845	0.900421	-0.205172	0.959321
ENSDARG00000004643	cdhr1a	-0.0199387	0.999251	7.07955	0.0488539	-5.44238	0.265221	-7.56532	#N/A	-3.25452	0.500352
ENSDARG00000004647	spice1	-2.94393	0.0764117	-0.720444	0.875141	1.1826	0.843008	-1.20867	0.690977	-1.13471	0.822219
ENSDARG00000004648	kctd16a	1.56986	0.803	2.29163	0.806093	3.43018	0.817771	-1.66587	#N/A	7.17479	0.352859
ENSDARG00000004658	zgc:101810	2.35618	0.443121	1.13511	0.867415	-5.23912	0.174893	-1.4168	0.771186	-2.38632	0.687726
ENSDARG00000004672	ptk2ab	-0.390595	0.622532	-0.36667	0.788129	-0.542379	0.738678	-1.43508	0.0589081	-1.23516	0.173116
ENSDARG00000004680	dnajb6a	0.366799	0.707184	-0.353112	0.838906	0.626967	0.743408	0.232711	0.875249	-0.268423	0.923289
ENSDARG00000004687	acaa1	0.575107	0.6959	1.11687	0.499207	2.33355	0.213511	0.784894	0.680616	0.427524	0.9159
ENSDARG00000004692	nabp1a	0.0460927	0.987196	-0.888616	0.276055	-0.231944	0.966832	-0.538762	0.595011	-0.749395	0.528796
ENSDARG00000004695	six4a	-1.14808	0.649651	-7.46429	0.00612374	-0.206527	0.981205	-1.20415	0.727773	-9.85954	0.000400605
ENSDARG00000004696	eefsec	-0.14027	0.962162	-0.611836	0.817784	1.1015	0.687595	0.887671	0.646834	0.192434	0.968779
ENSDARG00000004697	rxrgb	1.42264	0.329475	1.06011	0.658146	-1.09691	0.774847	-0.600877	0.814725	1.01658	0.764755
ENSDARG00000004702	irf2bp2a	0.784389	0.0109025	0.378788	0.46092	0.0731113	0.970291	0.479193	0.334207	1.69874	7.23072e-06
ENSDARG00000004706	syf2	0.587012	0.379233	-0.603094	0.520974	0.604084	0.671179	0.266738	0.81836	0.614957	0.634859
ENSDARG00000004712	tbr1b	7.94695	0.00571563	0.886742	0.903164	-10.0122	0.00554699	-2.88864	0.465586	-2.10059	0.738523
ENSDARG00000004713	mad2l1	-2.31961	0.00784737	1.35753	0.301932	0.0881384	0.984824	-0.775812	0.6411	0.876733	0.696547
ENSDARG00000004714	tcf12	1.0629	0.00570737	-0.33017	0.685436	-1.46861	0.00407289	-0.509623	0.436313	-1.91747	5.81334e-05
ENSDARG00000004721	mpp5b	-0.0214492	0.999251	-2.23471	0.888056	0.567746	#N/A	0.966842	#N/A	-8.15476	0.377942
ENSDARG00000004724	tcea3	-0.271482	0.951456	-0.446941	0.942644	1.32509	0.844994	2.05912	#N/A	-1.09517	0.853072
ENSDARG00000004726	trappc11	0.297228	0.755014	-0.690093	0.500981	0.348611	0.915843	1.16395	0.190743	0.422441	0.827436
ENSDARG00000004727	cmss1	-0.0237124	0.999251	1.18895	0.425923	-0.194798	0.970944	1.21585	0.43986	1.01322	0.646822
ENSDARG00000004735	hnrnpub	-0.543283	0.190562	-0.466116	0.437804	-0.723454	0.244341	-1.43794	0.00129292	-0.889014	0.120128
ENSDARG00000004745	lmbr1l	-2.06423	0.361796	-1.31166	0.760439	-0.207756	0.982621	-1.1366	0.762144	-3.03198	0.384606
ENSDARG00000004748	zgc:100868	4.33859	0.00928832	1.40985	0.660352	-2.60979	0.437026	0.00799545	0.998918	-1.00971	0.856076
ENSDARG00000004753	mylkb	0.992944	0.221598	2.27555	0.00231614	0.734709	0.760678	1.3117	0.240509	-1.40172	0.211003
ENSDARG00000004754	hspa4a	-0.412879	0.423112	-0.111252	0.938279	0.956955	0.136749	0.502376	0.469085	0.0699485	0.971583
ENSDARG00000004757	ybx1	0.15435	0.83309	-0.851102	0.120181	0.311386	0.848359	0.394214	0.604929	-0.295539	0.825628
ENSDARG00000004763	hhla2a.2	-0.779828	0.768419	-8.3956	0.00124043	0.722461	0.960259	-1.12224	#N/A	-10.0293	0.000220406
ENSDARG00000004771	ankrd10b	-1.30804	0.271787	1.62289	0.265805	-0.166973	0.975534	-2.00122	0.175887	0.584933	0.877982
ENSDARG00000004774	wdr36	-1.30643	0.0180368	-0.0999182	0.96821	-0.323592	0.913283	-0.172681	0.893084	-0.912759	0.378278
ENSDARG00000004782	fgfr3	0.781382	0.330558	-0.0362684	0.986197	-1.98603	0.0329698	-0.247792	0.871532	-0.794324	0.59486
ENSDARG00000004785	cops2	-0.465348	0.390077	0.512458	0.487855	0.418493	0.745739	0.252318	0.780026	1.70035	0.0032727
ENSDARG00000004789	lrp1ba	2.41082	0.158146	0.802096	0.842054	-0.985313	0.899802	-2.5185	0.268936	-1.44998	0.699262
ENSDARG00000004794	ccdc146	3.91056	0.358873	-4.59922	0.409271	-7.02733	0.185513	-3.75511	#N/A	-7.05527	0.189622
ENSDARG00000004796	mgrn1b	-0.0851637	0.943894	0.131856	0.940782	0.38335	0.83709	-0.189586	0.867459	0.204325	0.924126
ENSDARG00000004806	grwd1	-1.03515	0.0852594	-0.14589	0.944442	0.308794	0.927252	0.288807	0.813816	-0.73759	0.547864
ENSDARG00000004823	asz1	-6.85732	#N/A	6.67148	#N/A	5.83762	#N/A	-0.599157	#N/A	5.53491	#N/A
ENSDARG00000004830	flot2a	0.594423	0.330611	-0.965482	0.156585	0.378105	0.848359	1.26682	0.0683355	-0.53233	0.667097
ENSDARG00000004836	dnajc5ab	0.330247	0.605608	0.422354	0.636372	0.173208	0.970291	-0.525504	0.503592	-0.0220529	0.992669
ENSDARG00000004840	rassf1	-0.892982	0.303705	0.472941	0.790574	1.06464	0.482643	0.910067	0.464122	0.719197	0.698125
ENSDARG00000004843	foxp1a	-1.99097	0.00569938	0.384376	0.850891	-0.22076	0.970291	-1.19146	0.300743	-0.897352	0.584236
ENSDARG00000004851	hinfp	-0.850601	0.598236	0.668744	0.826979	1.04967	0.779536	-0.458377	0.863047	2.1135	0.337086
ENSDARG00000004861	esrrga	0.374488	0.622266	-0.358886	0.779644	0.185699	0.970291	-1.66457	0.0160615	-0.328804	0.864993
ENSDARG00000004866	rfx5	0.240706	0.770478	-0.174606	0.913431	0.449206	0.790897	0.623019	0.473662	0.687147	0.531302
ENSDARG00000004866	mindy1	0.240706	0.770478	-0.174606	0.913431	0.449206	0.790897	0.623019	0.473662	0.687147	0.531302
ENSDARG00000004869	penka	3.9201	0.492426	4.11341	0.573289	-0.999747	0.97039	-3.90905	#N/A	2.15233	0.888796
ENSDARG00000004870	psen1	-0.471481	0.477779	0.0950536	0.967082	-0.383746	0.84599	-0.680397	0.423874	0.323185	0.858643
ENSDARG00000004871	mst1rb	8.1693	0.00587508	-0.186627	0.979775	-0.999717	0.970291	0.340129	#N/A	3.42341	0.551858
ENSDARG00000004874	spata6l	-0.0199384	0.999251	7.63025	0.545903	-0.999787	#N/A	-0.599187	#N/A	1.7292	0.95711
ENSDARG00000004875	tmc6b	-1.37754	0.213894	0.925611	0.619686	0.138337	0.97798	-0.227901	0.922405	0.277928	0.950549
ENSDARG00000004877	rock2b	-0.146181	0.833497	0.610951	0.295244	1.31878	0.0160845	0.859137	0.13331	0.630331	0.406977
ENSDARG00000004880	acsm3	0.438218	0.746263	-0.266242	0.923936	1.1485	0.564731	1.74424	0.176037	-0.281829	0.942225
ENSDARG00000004889	aga	1.27612	0.608593	0.436968	0.9473	-1.45565	0.814476	0.0921644	0.983923	2.20469	0.58472
ENSDARG00000004891	pex19	0.348939	0.643337	0.400828	0.725696	0.174834	0.970291	0.4479	0.651753	0.76541	0.471748
ENSDARG00000004898	zp2l2	4.89036	#N/A	-5.57901	#N/A	-0.999683	#N/A	4.31122	#N/A	-1.80521	#N/A
ENSDARG00000004904	gys2	5.02554	0.117599	3.64606	0.296163	-0.999728	0.970291	-1.58124	#N/A	0.588795	0.956667
ENSDARG00000004906	stip1	-0.236781	0.700385	0.0859505	0.959692	-0.140672	0.970291	0.302798	0.705457	0.0470393	0.981877
ENSDARG00000004925	immp2l	0.202082	0.95333	0.569843	0.880894	0.440735	0.970291	1.36293	#N/A	0.572217	0.917741
ENSDARG00000004930	lmo7a	0.306628	0.75379	-0.304449	0.859825	2.81611	0.000350571	2.53555	0.00074935	1.1531	0.290769
ENSDARG00000004931	slc8a3	-0.628396	0.824151	1.91815	0.489127	-1.10292	0.880031	-1.56661	0.597643	2.32868	0.496701
ENSDARG00000004932	anos1b	0.109074	0.973177	-1.98414	0.124167	1.74845	0.330652	-0.800267	0.666302	-3.05452	0.0260753
ENSDARG00000004937	skp2	-4.4178	5.01376e-12	-0.182942	0.947752	1.17252	0.388199	-2.04876	0.0357689	-1.8461	0.100372
ENSDARG00000004939	mtdhb	-0.322825	0.746733	0.0461582	0.9803	-0.666893	0.694637	-0.802963	0.451089	-0.290447	0.912063
ENSDARG00000004948	bccip	-0.372728	0.677107	0.540001	0.652001	0.681723	0.657815	1.00217	0.289706	1.19573	0.250956
ENSDARG00000004952	rsad2	-0.0199383	#N/A	-0.668713	#N/A	-0.999683	#N/A	-0.599086	#N/A	-6.56965	#N/A
ENSDARG00000004953	mxb	4.04498	#N/A	-4.73363	#N/A	-0.999683	#N/A	3.46583	#N/A	-1.80521	#N/A
ENSDARG00000004954	grna	2.56545	0.25907	1.23394	0.796325	6.98364	0.103216	2.24159	0.503592	3.57965	0.300996
ENSDARG00000004956	zmat2	0.848369	0.397365	-0.122341	0.972496	-0.167886	0.971098	0.744645	0.615213	0.241697	0.948504
ENSDARG00000004964	cyp4t8	0.652298	0.802005	3.94461	0.0281306	-2.96132	0.25656	0.985998	0.759326	3.86266	0.103368
ENSDARG00000004979	elovl5	-3.57981	0.0137594	2.52727	0.215986	1.14851	0.824341	-2.44815	0.275337	1.24212	0.761293
ENSDARG00000004988	ppp3ca	3.96782	0.000620581	0.0127578	0.997458	-3.16954	0.0808948	-1.70777	0.371485	-0.174052	0.976255
ENSDARG00000005002	brf1b	-1.55203	0.032933	-0.404175	0.83153	0.595246	0.807563	-0.613193	0.6488	-0.389553	0.889964
ENSDARG00000005004	slc5a12	4.05788	0.390616	4.26978	0.437804	-6.44235	0.323656	1.03606	#N/A	0.680976	0.964993
ENSDARG00000005010	si:dkeyp-2e4.8	-1.47482	0.665457	1.50115	0.792194	0.188393	0.987393	2.13412	#N/A	0.682805	0.949258
ENSDARG00000005015	tspy	-0.850174	0.194921	1.05134	0.186603	-0.246398	0.964107	-0.563465	0.590245	0.772105	0.531657
ENSDARG00000005023	fkbp9	-1.05599	0.212548	0.403147	0.840389	-0.745313	0.71869	-1.04633	0.387611	-1.37326	0.291986
ENSDARG00000005026	tshz1	0.336724	0.675747	-0.493519	0.64516	-1.19985	0.168255	-1.44258	0.048459	-0.942544	0.34281
ENSDARG00000005034	ispd	0.125174	0.994075	-0.756613	0.89158	2.16726	0.637687	0.69062	0.870724	-1.05679	0.878718
ENSDARG00000005049	rab20	3.03432	0.000313146	-0.366872	0.890556	1.8775	0.275915	3.66252	0.00102971	3.08014	0.0150735
ENSDARG00000005050	wnt2ba	6.65427	0.304599	-7.34293	0.392122	-0.999767	#N/A	2.04749	#N/A	-7.83283	0.463094
ENSDARG00000005057	dimt1l	0.233034	0.963225	0.587042	0.914184	-0.95784	0.92468	0.511319	0.900394	0.53236	0.947008
ENSDARG00000005058	ncapd2	-2.49209	1.97133e-16	0.316045	0.65047	0.0388663	0.9831	-0.775446	0.121305	-0.417077	0.600755
ENSDARG00000005078	eif4e3	1.16874	0.0341318	0.268755	0.856583	-0.815215	0.457356	-0.023613	0.985319	0.15411	0.950393
ENSDARG00000005085	ggctb	0.342081	0.931219	2.08806	0.466244	-1.20164	0.872281	-0.930863	0.797809	1.52665	0.746208
ENSDARG00000005092	cep89	-1.13415	0.177407	-0.27991	0.904621	0.301916	0.968774	-1.206	0.304045	-0.797071	0.664969
ENSDARG00000005095	glcea	7.88154	0.000117999	0.639519	0.86159	-6.90181	0.00910548	-0.497834	#N/A	3.9618	0.121921
ENSDARG00000005098	zgc:86764	-2.28702	0.0396455	0.91059	0.685198	0.748624	0.872063	-0.838557	0.688143	0.452916	0.922157
ENSDARG00000005104	limk2	0.103714	0.964765	0.315116	0.895312	-1.04502	0.548417	-0.97924	0.459902	-0.679411	0.754983
ENSDARG00000005108	oclna	1.30445	0.572174	0.977389	0.824926	-3.18315	0.272793	-0.966035	0.780026	-1.22019	0.815338
ENSDARG00000005112	cdh17	0.488566	0.753723	3.67069	0.000302614	-2.19953	0.15337	-1.98556	0.159542	2.37008	0.113273
ENSDARG00000005115	calub	-0.845461	0.262314	-0.0635496	0.978057	-0.0547352	0.986548	-0.73392	0.51013	-1.23344	0.267933
ENSDARG00000005122	atp2a2b	-0.503979	0.358972	-0.578568	0.427371	-0.261783	0.91555	-0.168159	0.870973	-0.817008	0.307228
ENSDARG00000005126	large1	0.859233	0.100543	-0.183025	0.903401	-1.70543	0.00811163	-0.507778	0.55309	-0.367013	0.803661
ENSDARG00000005128	rnaseh2b	-1.72141	0.0447328	0.251333	0.926512	0.0956748	0.981661	-0.383516	0.833124	-0.59208	0.823607
ENSDARG00000005134	psmd11b	-0.840097	0.175735	0.215742	0.900323	0.945892	0.360584	-0.556793	0.57263	-0.0573587	0.984622
ENSDARG00000005139	hhatlb	-1.00255	0.820197	-0.227884	0.97834	1.28154	0.942314	1.96257	#N/A	5.96183	0.306393
ENSDARG00000005141	camkvb	-0.842753	0.830952	0.521537	0.952905	0.793296	0.970291	-1.15941	0.809924	-1.76027	0.790803
ENSDARG00000005150	tbx20	-0.0792997	0.968326	-1.90808	0.00980856	3.21122	0.000119935	1.70447	0.0560512	1.99592	0.052874
ENSDARG00000005154	aspa	1.43224	0.132108	1.42127	0.240752	0.526656	0.920069	3.79448	0.00304903	2.40531	0.0652768
ENSDARG00000005159	cyth1a	1.53936	0.00717103	0.178772	0.924362	0.283441	0.948588	0.86484	0.35861	0.719352	0.577907
ENSDARG00000005162	tpm3	0.600688	0.0743433	0.551568	0.214403	0.303621	0.74835	1.54692	3.09097e-05	1.5528	6.97228e-05
ENSDARG00000005163	efr3a	0.414842	0.592496	0.575057	0.571199	0.697994	0.607697	0.385109	0.729632	0.60107	0.657282
ENSDARG00000005172	dynll2b	1.76381	0.0953315	0.251727	0.944063	1.10113	0.697062	2.09285	0.150023	0.252554	0.956471
ENSDARG00000005176	zgc:101040	1.51544	0.556664	1.13011	0.814306	-1.07846	0.921273	-0.0355509	#N/A	1.79813	0.717675
ENSDARG00000005179	dglucy	0.165609	0.983182	0.800651	0.879931	-0.346256	0.97327	0.654941	0.876259	0.44423	0.959321
ENSDARG00000005185	cpn1	-1.26786	#N/A	-4.51178	#N/A	1.64871	#N/A	-0.783518	#N/A	-5.24777	#N/A
ENSDARG00000005186	sp4	-0.611805	0.453972	-0.40062	0.802585	0.266272	0.966444	-1.29324	0.164141	-1.50133	0.133747
ENSDARG00000005191	ahcy	-0.0600818	0.912667	0.432873	0.245697	0.253175	0.741849	0.662848	0.0653592	0.752184	0.0488514
ENSDARG00000005210	coro2a	-2.11644	0.367288	2.55141	0.400613	-0.59869	0.970291	-2.47619	0.437476	-0.132507	0.989338
ENSDARG00000005216	zgc:158328	1.10594	0.129833	-1.17313	0.206066	-1.12205	0.36956	1.02743	0.33465	-0.803628	0.591986
ENSDARG00000005218	wrnip1	-0.805585	0.70027	0.824071	0.818742	0.605839	0.96284	0.0281616	#N/A	-0.543181	0.928383
ENSDARG00000005220	pdcd6	2.29185	5.38618e-06	-0.204438	0.904621	2.9338	0.000204845	2.692	3.54373e-05	1.64883	0.0386567
ENSDARG00000005221	desmb	6.01196	0.0474106	3.08922	0.40314	-0.99973	0.970291	0.182779	#N/A	-1.64789	0.820824
ENSDARG00000005230	ssr2	0.341412	0.625161	0.388147	0.713291	0.00518921	0.998283	0.193842	0.863221	0.422806	0.757829
ENSDARG00000005232	ccdc85ca	0.694978	0.559603	-0.496519	0.830657	-1.33219	0.447257	-0.631698	0.71336	-1.1418	0.543471
ENSDARG00000005236	srcap	-0.582291	0.29952	-0.888711	0.163633	-0.34178	0.856802	-0.808441	0.261989	-1.05251	0.163921
ENSDARG00000005246	asb3	-0.504049	0.813457	-9.31438	2.40832e-05	0.880039	0.87323	-0.0965411	0.975297	-9.80251	2.32611e-05
ENSDARG00000005251	rpe	0.283915	0.808942	0.438511	0.797619	-0.301459	0.961922	1.33712	0.209036	-0.1639	0.960975
ENSDARG00000005254	kdelr2a	-0.0377564	0.988331	-0.221319	0.871412	0.479657	0.718956	0.160579	0.883864	-0.111434	0.961269
ENSDARG00000005271	zc3h12a	-1.73927	0.79875	-5.6296	0.437804	5.68045	#N/A	-2.08086	#N/A	-5.24793	0.597016
ENSDARG00000005274	rad52	-2.05142	0.459984	0.229836	0.977183	0.856359	0.970291	-0.272014	0.958906	0.0511542	0.997049
ENSDARG00000005284	fbxl15	1.73902	0.141897	-0.627047	0.820722	-1.57966	0.477248	1.32615	0.46862	-0.343565	0.943628
ENSDARG00000005315	celf1	0.0829765	0.933202	-0.314685	0.744757	-0.492315	0.642081	0.460345	0.539732	0.102042	0.960949
ENSDARG00000005318	stam2	1.42648	0.00819077	-0.800566	0.333712	-0.0728662	0.979402	2.16298	0.00131836	0.450241	0.776168
ENSDARG00000005320	nipsnap1	5.41285	0.250225	2.74716	0.733427	-0.999697	0.970291	0.806083	#N/A	1.14136	0.94537
ENSDARG00000005327	ftr66	5.6099	#N/A	-6.29856	#N/A	-0.999683	#N/A	5.03076	#N/A	-1.80521	#N/A
ENSDARG00000005332	lipib	-1.59736	0.673212	-0.547214	0.959026	-0.120779	0.991317	-0.490233	#N/A	-1.8228	0.824277
ENSDARG00000005335	slc22a4	4.04667	#N/A	3.08259	#N/A	-0.999689	#N/A	3.46752	#N/A	6.0127	#N/A
ENSDARG00000005343	ccdc85al	-1.11453	0.757281	2.63294	0.489349	-1.23121	0.925153	-3.33118	#N/A	-1.41464	0.851334
ENSDARG00000005350	dip2ba	-0.25569	0.63035	0.0104548	0.994034	0.348945	0.760678	0.218743	0.775892	0.145183	0.929131
ENSDARG00000005355	larp6a	2.0162	0.11224	0.622683	0.843257	-1.19475	0.713988	-0.291426	0.91639	0.806998	0.830674
ENSDARG00000005356	tyro3	-2.09699	0.107445	-0.978396	0.704805	0.308549	0.970291	-1.02638	0.651856	-3.1713	0.0787545
ENSDARG00000005359	sucla2	0.237753	0.780225	0.297303	0.827553	-0.0230636	0.9917	0.999569	0.195679	0.837441	0.397364
ENSDARG00000005364	grin3ba	-0.0199386	0.999251	-0.668722	0.972431	-6.61229	0.353199	-7.89972	#N/A	-9.20208	0.124745
ENSDARG00000005368	mcamb	-2.19263	6.95226e-06	0.628273	0.488661	1.7943	0.0130605	0.51928	0.593685	0.0418356	0.988123
ENSDARG00000005371	gprc6a	-0.0199383	#N/A	-0.668713	#N/A	-0.999683	#N/A	-6.74199	#N/A	-9.10561	#N/A
ENSDARG00000005372	camk4	4.76278	0.233081	-0.611252	0.962507	-1.91912	0.931506	-1.05768	#N/A	-0.206371	0.989695
ENSDARG00000005374	tubgcp4	-0.683677	0.384108	0.80235	0.437814	0.0411803	0.988717	-0.835251	0.429883	-0.0645559	0.984822
ENSDARG00000005382	prdm9	-0.960538	0.23102	-0.595401	0.677132	0.0689044	0.984879	-0.0472737	0.978643	-0.577443	0.774911
ENSDARG00000005394	dnmt3aa	0.450194	0.737897	0.0189825	0.994676	-1.38349	0.403328	-0.798983	0.611612	-0.197489	0.961269
ENSDARG00000005397	trim3b	0.710033	0.233537	-0.830291	0.265034	0.17036	0.970291	-0.238788	0.831422	-0.559819	0.654092
ENSDARG00000005414	grapa	-0.085281	0.98477	2.65864	0.016795	7.42308	0.015914	-0.465664	0.824791	3.18898	0.0222759
ENSDARG00000005416	map3k5	0.296318	0.734057	-0.159246	0.933435	0.824458	0.484892	0.753874	0.419973	0.201585	0.935483
ENSDARG00000005423	pgam1a	3.15109	9.49813e-15	0.0276755	0.983508	0.166411	0.970291	2.31851	2.0054e-05	1.4417	0.027103
ENSDARG00000005425	wdfy1	0.762228	0.307475	0.0861108	0.973501	-0.580565	0.763588	0.760688	0.474669	0.854362	0.51478
ENSDARG00000005448	mtfmt	-0.123596	0.997826	0.489305	0.953253	1.57062	0.855585	-0.325067	0.950144	2.16737	0.689309
ENSDARG00000005451	gdi2	0.248345	0.608142	-0.497894	0.34693	0.367053	0.69032	1.06631	0.01782	0.43107	0.572696
ENSDARG00000005453	foxp2	1.12723	0.153803	-0.522616	0.745536	-0.707277	0.729308	-2.16491	0.0187343	-1.93462	0.0641338
ENSDARG00000005454	tacc3	-2.62149	9.91658e-08	0.415562	0.732879	0.688436	0.588033	-1.12733	0.158387	-0.353122	0.851318
ENSDARG00000005456	katnb1	1.04528	0.0445709	0.0401432	0.979053	-1.11771	0.165204	1.07947	0.136854	0.750357	0.455313
ENSDARG00000005458	csnk1g2a	-0.144454	0.861704	-0.660256	0.331627	0.36763	0.816221	0.192831	0.848176	-0.0852203	0.968155
ENSDARG00000005462	kif4	-2.62718	0.00219913	0.776304	0.668382	0.0917274	0.98442	-1.73447	0.188965	-0.348652	0.928438
ENSDARG00000005463	slc30a1a	0.32747	0.687073	0.729263	0.394367	-0.269413	0.943534	0.133474	0.918953	1.51066	0.0637684
ENSDARG00000005464	dnase1l1	-0.767654	0.397992	-0.145154	0.96354	0.601317	0.814964	1.34732	0.237712	-0.319143	0.918101
ENSDARG00000005468	irf2bp1	-0.153632	0.900791	0.0992091	0.971134	-0.0812163	0.979288	0.178287	0.901492	0.0994652	0.973338
ENSDARG00000005476	nav3	0.577257	0.627944	0.164553	0.963984	-1.29417	0.434636	-1.5255	0.224082	-1.61063	0.263467
ENSDARG00000005479	tenm3	-0.0442573	0.985079	-0.706494	0.376185	-0.637309	0.593736	-1.41705	0.0377856	-2.08001	0.00150003
ENSDARG00000005481	nfkbiaa	1.49392	0.00550515	3.21223	3.83318e-10	1.20897	0.220761	2.62749	0.000105477	5.72609	9.19085e-20
ENSDARG00000005482	rapgef2	0.880713	0.0159429	-0.102126	0.934637	-0.41999	0.647344	-0.994466	0.0414029	-0.22153	0.866773
ENSDARG00000005485	ucmab	0.68964	0.770451	4.41348	0.00468128	-0.44749	0.970291	-0.989371	0.726811	-0.283246	0.964993
ENSDARG00000005500	dgcr6	0.280278	0.889512	-0.127116	0.976024	0.720713	0.877208	0.110343	0.96411	0.467488	0.913453
ENSDARG00000005510	gdf6b	-2.51293	0.463323	-1.05243	0.897859	7.76559	0.0860209	2.35129	#N/A	-0.440196	0.972656
ENSDARG00000005513	naca	-0.464448	0.533062	0.0751727	0.974338	0.674064	0.611555	0.520086	0.609805	0.73827	0.532677
ENSDARG00000005518	slc5a9	7.30974	0.0648724	0.776523	0.951697	-8.24969	0.149022	-0.355908	#N/A	1.94206	0.877982
ENSDARG00000005522	galr1a	-0.0199383	#N/A	-0.668713	#N/A	-0.9998	#N/A	-4.62669	#N/A	-6.56975	#N/A
ENSDARG00000005525	acy3.2	0.235076	0.890555	1.68319	0.145011	0.722207	0.814896	1.0408	0.486871	1.98145	0.154303
ENSDARG00000005526	igfn1.1	3.86287	0.0777475	-0.654419	0.921641	2.0276	0.785025	0.0536576	0.990788	0.364302	0.970498
ENSDARG00000005536	ubr7	-0.745048	0.277486	0.559499	0.614831	0.0606284	0.98442	-0.454489	0.685466	0.466342	0.78531
ENSDARG00000005540	xpo7	-2.13995	2.26439e-06	-0.32433	0.790811	0.51634	0.702316	-1.32601	0.0490005	-0.753758	0.444957
ENSDARG00000005541	wif1	-0.547159	0.63313	0.380158	0.868094	0.544944	0.880537	0.118777	0.951684	-0.234895	0.949258
ENSDARG00000005544	btbd3a	0.844847	0.370754	0.714161	0.627858	-1.07816	0.511853	0.142384	0.939161	0.867732	0.6296
ENSDARG00000005547	rint1	-0.469536	0.788258	0.122194	0.976593	0.516578	0.946044	-0.111954	0.964765	0.0202946	0.997726
ENSDARG00000005549	znf710b	1.51338	6.74423e-05	-0.423277	0.564794	-1.32407	0.0193466	-0.0543162	0.956758	-0.507914	0.572766
ENSDARG00000005551	hnrnph1l	0.194959	0.817606	-0.711807	0.346195	-1.1895	0.1167	-0.477336	0.591871	-0.751354	0.439983
ENSDARG00000005559	pou4f1	2.20282	0.2471	0.82126	0.852625	1.41476	0.849713	-2.59848	0.293753	-0.584917	0.93404
ENSDARG00000005560	ywhah	1.48927	9.29501e-05	-1.06906	0.0269732	-0.602677	0.481502	-0.268421	0.744252	-0.805151	0.251837
ENSDARG00000005561	gfm2	-0.668857	0.573925	-1.1345	0.417806	2.33149	0.0809026	-0.567866	0.744822	-1.68678	0.261909
ENSDARG00000005565	entpd8	-1.9313	0.776992	3.4569	0.69153	5.63229	#N/A	4.12153	#N/A	7.04101	0.431405
ENSDARG00000005574	vsx2	0.753685	0.833723	-0.768621	0.903884	-3.71824	0.302325	-1.79677	0.636003	-1.10283	0.89011
ENSDARG00000005576	mphosph8	-0.101025	0.868617	0.143219	0.880404	0.119157	0.970291	-0.194362	0.770885	0.400688	0.583985
ENSDARG00000005578	ugp2a	2.55983	0.0488759	2.26898	0.177671	1.38888	0.717137	2.14688	0.266227	2.73159	0.173269
ENSDARG00000005586	zbtb20	-0.278715	0.954428	2.12748	0.490717	1.65662	0.782086	-3.14724	0.255945	1.49039	0.775917
ENSDARG00000005590	mtf2	-1.73994	0.00140696	0.129669	0.954292	-0.265083	0.949567	-1.55888	0.0414659	-1.08137	0.277976
ENSDARG00000005593	rxrga	2.02855	0.0070759	-0.070826	0.97834	-1.06627	0.524329	0.341491	0.838222	2.11337	0.0727658
ENSDARG00000005595	adgb	1.11934	0.67315	-9.02549	0.000755414	2.19014	0.661869	1.73004	#N/A	-8.64023	0.00440426
ENSDARG00000005606	paxip1	-2.06141	2.82728e-05	1.07977	0.126229	-0.274914	0.935681	-1.76586	0.0097676	-0.333088	0.859916
ENSDARG00000005612	aph1b	0.26607	0.881064	-2.12919	0.0669902	0.0771308	0.987136	0.935609	0.572162	-0.910562	0.703366
ENSDARG00000005616	bfb	1.54301	0.874779	6.96976	0.350334	-0.999694	0.9731	-4.47876	#N/A	7.39619	0.455976
ENSDARG00000005619	nek2	-3.40898	0.0161538	1.49976	0.557002	0.209882	0.976374	-2.7331	0.191797	-0.849392	0.867085
ENSDARG00000005625	maco1a	-0.593453	0.468097	-0.504627	0.711967	0.828756	0.569343	-0.65008	0.562747	-0.997433	0.416334
ENSDARG00000005626	si:ch211-133l11.10	6.40483	0.0799193	0.888121	0.927614	-7.69029	0.133083	-1.47496	#N/A	0.274272	0.986076
ENSDARG00000005627	zmp:0000000527	-1.05219	0.68474	-8.06	0.00312593	-0.188777	0.983411	6.79218	#N/A	-5.83289	0.116251
ENSDARG00000005629	smyd2b	-0.341871	0.847269	0.44589	0.876272	-0.989623	0.718724	0.323523	0.887683	0.997513	0.691399
ENSDARG00000005640	adat3	-0.573058	0.874992	-0.44407	0.953253	-1.0499	0.926377	-0.777107	#N/A	-1.27318	0.844367
ENSDARG00000005643	gcat	-0.842822	0.235935	-0.366273	0.819668	0.581561	0.757144	2.54631	0.0020713	1.09512	0.366301
ENSDARG00000005645	robo3	0.836843	0.190408	-0.888744	0.281943	-1.68222	0.0340125	-1.81727	0.0119778	-1.6293	0.046021
ENSDARG00000005648	olfml2a	-0.301303	0.832556	-1.62319	0.132296	2.2823	0.0585013	0.83327	0.564856	-2.36052	0.0446579
ENSDARG00000005651	hrasb	0.782384	0.521692	0.398783	0.881399	-1.12695	0.604846	-0.804433	0.637494	0.0869108	0.98596
ENSDARG00000005652	man1a1	-2.02578	2.8369e-06	0.668555	0.367054	1.54753	0.0183566	-0.783941	0.293106	-0.719444	0.441756
ENSDARG00000005670	ttbk2a	0.797415	0.479882	0.261825	0.926134	-0.175883	0.972201	-1.54288	0.234635	-0.79912	0.724912
ENSDARG00000005673	f3b	0.55287	0.733883	-1.04918	0.588283	6.60459	4.82688e-05	1.94382	0.215661	1.82148	0.347869
ENSDARG00000005675	sec61a1l	-0.385995	0.521726	0.722512	0.270886	-0.258089	0.920406	-0.554119	0.47183	0.157642	0.937578
ENSDARG00000005679	trip10a	0.0209549	0.999251	0.855699	0.325391	1.34407	0.152732	0.905543	0.330378	0.903549	0.420787
ENSDARG00000005690	slc25a23a	1.07105	0.227634	0.77288	0.586105	-1.27239	0.386327	-0.0423719	0.983075	0.659774	0.757829
ENSDARG00000005699	ddx19	-0.671586	0.178938	0.258422	0.825999	-0.57428	0.569343	-0.158952	0.87695	-0.262646	0.873076
ENSDARG00000005704	eps8l3b	8.4472	0.000167531	-0.41956	0.944384	-6.02734	0.0673594	1.61802	#N/A	1.14646	0.834806
ENSDARG00000005713	ethe1	9.24773	3.13588e-07	0.505698	0.840817	-5.02734	0.0754267	3.2259	0.0196367	0.466251	0.903484
ENSDARG00000005716	olfml2ba	8.3305	0.000439168	0.844679	0.868305	-0.999732	0.970291	-1.64551	0.615741	-2.15225	0.588033
ENSDARG00000005738	rpf1	0.0358495	0.998494	-0.0949395	0.972815	-0.182096	0.970291	-0.0188897	0.989555	0.399363	0.864065
ENSDARG00000005739	gpm6ba	0.275038	0.935028	-0.685835	0.867415	1.09646	0.843836	-1.05781	0.708225	-0.759843	0.894814
ENSDARG00000005749	cand2	8.48011	2.00225e-05	0.654778	0.846883	-0.999701	0.970291	2.65092	#N/A	2.57562	0.261319
ENSDARG00000005754	ptprfb	-0.264	0.84484	-0.00377219	0.99823	-1.25357	0.375244	-1.4104	0.209963	-1.17142	0.419234
ENSDARG00000005762	col14a1a	-2.09584	0.0145002	-0.00759649	0.997573	-0.232686	0.970291	-0.69365	0.674099	-0.74553	0.754026
ENSDARG00000005772	tsr2	-1.44982	0.0562882	0.615144	0.683179	0.0665534	0.985696	-0.709729	0.590745	0.0654194	0.986324
ENSDARG00000005774	ddx3xb	-0.288779	0.466136	-0.687948	0.0766814	-0.416538	0.535035	-0.435015	0.386753	-0.406358	0.537605
ENSDARG00000005775	scn8aa	2.80921	0.0308898	-0.145161	0.976535	-2.56919	0.229189	-2.93333	0.0910588	-0.874796	0.827577
ENSDARG00000005776	guk1b	-0.0199387	0.999251	9.44737	0.0125847	-3.4424	0.725745	-0.599128	#N/A	-1.00217	0.935408
ENSDARG00000005780	npy8br	-8.78544	0.1927	-0.668718	0.977183	2.73827	#N/A	-0.599087	#N/A	-1.80523	0.949634
ENSDARG00000005783	ncanb	6.16445	9.23754e-11	-0.83831	0.643373	-5.80225	2.34545e-06	-2.65711	0.0281434	-1.13088	0.578115
ENSDARG00000005786	ppm1f	-0.667321	0.528264	-0.888296	0.520734	0.954621	0.617241	0.498987	0.756526	0.0858574	0.983575
ENSDARG00000005789	enpp1	-0.135808	0.94865	1.2811	0.295044	1.1004	0.560706	-0.266092	0.889865	0.489398	0.872327
ENSDARG00000005791	rpl28	-0.208042	0.7265	0.17635	0.87474	0.488646	0.582057	0.862815	0.113692	0.931175	0.119808
ENSDARG00000005799	smim14	3.83696	0.00479109	1.68162	0.411074	-2.0165	0.501906	0.808062	0.760109	3.12218	0.13738
ENSDARG00000005800	ampd3a	9.32553	0.000212292	-0.875604	0.882849	-3.44239	0.618709	-0.325634	0.94741	-1.19678	0.872227
ENSDARG00000005814	klhl10a	-0.022155	#N/A	-5.10437	#N/A	-0.00437552	#N/A	-3.12943	#N/A	-6.24774	#N/A
ENSDARG00000005821	ncf2	-2.28432	0.289983	-0.908645	0.859081	1.69242	0.762776	1.76153	0.605296	-0.22511	0.98018
ENSDARG00000005823	slc39a10	-0.639538	0.165896	0.440245	0.551629	-0.975574	0.126672	-0.721078	0.253863	0.272295	0.846996
ENSDARG00000005827	eif2s1a	-0.913873	0.0802701	0.104864	0.958966	-0.0719735	0.976968	0.0334867	0.978578	-0.243288	0.904157
ENSDARG00000005828	faima	-0.139093	0.997826	1.53984	0.794918	-2.17685	0.773584	-1.10398	#N/A	1.13943	0.908768
ENSDARG00000005834	gatad2b	1.0487	0.106313	-0.517793	0.671301	-0.363529	0.909892	-1.26914	0.140613	-1.12773	0.28165
ENSDARG00000005840	got2b	1.71893	0.00166719	-0.49675	0.665028	-0.722933	0.588315	1.02227	0.237141	0.0522155	0.986076
ENSDARG00000005841	tnni2a.2	4.97099	4.76021e-05	0.999995	0.693246	0.4059	0.970291	1.54952	0.452106	2.09009	0.353546
ENSDARG00000005842	cd9a	1.10465	0.666465	0.451912	0.943234	0.25129	0.978013	2.066	0.494961	1.56544	0.741831
ENSDARG00000005846		6.11537	0.431529	0.676138	0.976728	-7.83455	#N/A	5.53622	#N/A	0.425005	0.989119
ENSDARG00000005853	slc25a6	-0.0199386	0.999251	7.10597	0.212026	-0.99974	#N/A	-6.04175	#N/A	0.526794	0.977075
ENSDARG00000005861	ralgapa2	-1.845	1.77278e-06	0.683897	0.268304	1.59606	0.0040803	-1.28274	0.0215674	0.149887	0.937276
ENSDARG00000005867	gon4l	-0.757414	0.220265	0.392439	0.748777	-0.122441	0.970291	-0.821661	0.338802	0.227467	0.921699
ENSDARG00000005870	mmadhc	0.06733	0.995953	1.12399	0.570665	0.0664142	0.989196	0.842277	0.690855	1.51525	0.501044
ENSDARG00000005883	rfx1a	-0.262931	0.849001	-0.910426	0.479718	0.0631554	0.987209	-2.1927	0.0292031	-1.98381	0.0846945
ENSDARG00000005891	cyb5r3	2.69914	5.97587e-09	-0.655566	0.436634	0.640389	0.629603	3.00294	5.36145e-07	1.82202	0.0110229
ENSDARG00000005894	slc7a9	2.79441	0.707164	-1.47672	0.926134	2.62267	#N/A	5.83762	#N/A	-1.42646	0.949258
ENSDARG00000005897	dera	2.11077	8.4496e-07	-1.11198	0.0550607	3.49643	1.4068e-06	3.97713	3.15581e-13	2.86378	3.65188e-06
ENSDARG00000005908	clk4b	-0.0935401	0.968326	-0.311856	0.892581	-0.0987881	0.979679	-0.354435	0.832117	-0.142525	0.969107
ENSDARG00000005913	tgm1l3	-0.0199384	#N/A	6.37854	#N/A	-6.24955	#N/A	-0.599086	#N/A	-0.200461	#N/A
ENSDARG00000005915	tcf3a	-1.05602	0.0550945	-0.288723	0.83947	-0.186659	0.970291	-0.81345	0.332469	-0.493121	0.72348
ENSDARG00000005916	srpk3	-0.269411	0.900791	-0.0467714	0.989865	0.626009	0.916295	-0.558451	0.807313	-0.0871617	0.987862
ENSDARG00000005924	serpina10a	2.24199	0.00070391	0.244171	0.909112	0.670725	0.787472	0.547778	0.67969	-0.0871012	0.979656
ENSDARG00000005926	ak2	-0.105538	0.895389	-0.492191	0.461735	-0.259438	0.894671	1.39768	0.00832747	-0.210115	0.899544
ENSDARG00000005927	tbc1d17	1.79494	0.0249379	-0.708281	0.648687	-1.15442	0.482593	1.20343	0.340842	0.0233033	0.996059
ENSDARG00000005941	clul1	0.892318	0.0404711	-0.317226	0.736137	-0.557979	0.553784	0.560255	0.425988	0.0976027	0.961269
ENSDARG00000005941	yes1	0.892318	0.0404711	-0.317226	0.736137	-0.557979	0.553784	0.560255	0.425988	0.0976027	0.961269
ENSDARG00000005942	v2rl1	-0.0199383	#N/A	-0.668713	#N/A	-0.999803	#N/A	-5.84903	#N/A	-7.05516	#N/A
ENSDARG00000005943	htra4	3.76916	0.479954	0.780474	0.964	2.19813	0.946617	2.36026	#N/A	-0.856091	0.963699
ENSDARG00000005945	sart1	0.399669	0.455141	0.215073	0.852245	-0.78807	0.278332	-0.0933792	0.925411	0.00677306	0.998055
ENSDARG00000005948	ankmy2a	1.01747	0.266334	-0.263598	0.914184	-0.681975	0.790897	0.511893	0.744459	0.353099	0.912989
ENSDARG00000005972	ric8b	1.63291	0.0016454	-0.465176	0.672458	0.963091	0.346546	1.64777	0.0209289	1.02096	0.288678
ENSDARG00000005980	sfswap	0.392275	0.491395	-0.456366	0.562457	-0.18548	0.964539	-0.298763	0.729632	-0.18856	0.918908
ENSDARG00000005989	rgl1	-0.269492	0.603425	0.0567135	0.972455	-0.135503	0.970291	0.323574	0.644695	0.253284	0.838019
ENSDARG00000005993	prc1b	-2.66843	2.69966e-06	0.376189	0.817671	1.80297	0.0441216	-0.83246	0.427792	-0.326688	0.89869
ENSDARG00000006003	mycla	-0.513895	0.490439	-0.0788666	0.973497	-0.6393	0.65769	-0.981539	0.259651	0.965332	0.368536
ENSDARG00000006008	dct	0.902378	0.621658	2.44371	0.148431	-4.05905	0.0198119	-0.414194	0.888408	4.07705	0.0393009
ENSDARG00000006010	bmi1a	0.425327	0.90399	-1.95058	0.517699	-1.67819	0.738482	-0.728364	0.851183	-2.21637	0.557708
ENSDARG00000006011	klhl42	1.61822	0.167891	0.915341	0.648947	-0.452372	0.967024	1.19938	#N/A	1.07979	0.673888
ENSDARG00000006019	tktb	1.12682	0.000601023	-0.741387	0.0961119	-0.142958	0.967287	2.19157	1.83471e-08	0.993709	0.0518212
ENSDARG00000006025	tp53i11b	3.74781	0.0074292	-0.00950165	0.997584	-2.97175	0.204392	0.298489	0.928023	-0.333837	0.959642
ENSDARG00000006029	lta4h	-1.7144	0.015705	1.04441	0.331183	0.743462	0.69748	1.00216	0.395907	1.76577	0.111131
ENSDARG00000006031	abat	-0.122638	0.901894	1.50531	0.00576378	0.263667	0.93273	0.534274	0.542326	0.466523	0.713266
ENSDARG00000006038	aebp2	0.587081	0.496104	-0.240436	0.906287	-0.621002	0.754556	0.00165156	0.999235	0.317904	0.907196
ENSDARG00000006040	cyp20a1	0.0959266	0.973762	0.400966	0.872181	-0.903304	0.699428	0.153743	0.940874	0.967694	0.63996
ENSDARG00000006044	ust	-0.0865654	0.975138	0.947032	0.483502	0.560349	0.878618	-0.0316629	0.986644	-0.281027	0.937103
ENSDARG00000006052	malt2	-0.262838	0.962824	0.28493	0.972815	-1.06786	0.925104	1.6259	#N/A	0.30301	0.974041
ENSDARG00000006060	crybg1b	0.776045	0.524684	0.955303	0.560715	-1.80891	0.242027	-1.10025	0.47591	-1.38764	0.430573
ENSDARG00000006062	akap1b	-1.29987	0.0301777	0.635945	0.54391	-0.435457	0.84942	-1.19821	0.162386	-0.564452	0.708808
ENSDARG00000006065	znf385b	1.90459	0.113209	0.215861	0.963584	-0.355893	0.970291	-1.3922	0.444688	-0.658128	0.867085
ENSDARG00000006074	uck2a	-1.47669	0.035015	0.530779	0.721983	0.872139	0.581139	-1.39276	0.162275	-0.0357718	0.991726
ENSDARG00000006079	gpr37l1a	0.119359	0.999251	-8.41626	0.0258575	-0.477981	0.974911	-2.79405	#N/A	-10.4377	0.0105675
ENSDARG00000006092	rad21a	-0.657888	0.0226792	0.432569	0.310412	-0.575316	0.229552	-0.81265	0.0323781	-0.110511	0.929311
ENSDARG00000006093	cdk15	5.91688	3.95111e-10	-1.11997	0.545888	-0.374937	0.970291	6.79257	1.2109e-07	10.7477	0.000161229
ENSDARG00000006094	igf2r	0.567732	0.190147	-0.617321	0.265805	1.07592	0.0546008	1.24808	0.0114624	1.09181	0.0540041
ENSDARG00000006109	pimr185	-1.62151	#N/A	-0.668713	#N/A	0.601885	#N/A	-7.129	#N/A	-1.80521	#N/A
ENSDARG00000006110	chrd	-1.56745	0.521692	-6.79532	0.0235431	-0.938193	0.935928	-2.6156	#N/A	-10.0293	0.000584759
ENSDARG00000006112	myof	3.7688	0.0139441	1.39774	0.622557	-5.97484	0.00203359	-1.15586	0.682857	-0.871407	0.87117
ENSDARG00000006120	tbx2b	1.20726	0.13674	0.189735	0.944063	-1.59861	0.181015	-0.612821	0.660254	-1.27418	0.340987
ENSDARG00000006124	kdm5c	0.291675	0.470855	-1.12591	0.00073222	-0.507365	0.399551	-0.0649127	0.930272	-0.936781	0.0363928
ENSDARG00000006125	csnk1db	0.728403	0.115153	0.189336	0.878787	0.684928	0.410723	1.02155	0.0846573	0.796341	0.288978
ENSDARG00000006128	cep170aa	0.134483	0.860466	0.134308	0.919492	-0.640477	0.433685	-1.36423	0.00957185	-0.271085	0.845683
ENSDARG00000006137	star	-0.0199386	0.999251	6.88466	0.240459	-6.24972	0.428952	-6.8491	#N/A	-1.90396	0.899544
ENSDARG00000006151	pde11al	-0.467335	0.96141	1.72339	0.852432	0.170224	0.99075	-1.19848	#N/A	0.724442	0.963548
ENSDARG00000006169	lrrk2	0.551786	0.251467	-0.897491	0.0879141	0.0641344	0.975962	1.17098	0.0355725	-0.291865	0.827613
ENSDARG00000006174	lrrc23	6.67906	0.313515	-7.36772	0.402462	-7.02727	#N/A	6.09987	#N/A	-7.41778	0.511673
ENSDARG00000006181	hif1aa	3.0902	0.102854	-0.69618	0.894612	0.236341	0.979679	0.604139	0.879791	0.398006	0.961269
ENSDARG00000006192	gatad2ab	-1.10789	0.0052116	-0.67877	0.242945	0.318867	0.829636	-0.133723	0.887275	-0.288198	0.827577
ENSDARG00000006196	sav1	0.268518	0.755109	0.293055	0.840397	0.379523	0.873258	0.946849	0.25766	-0.180314	0.940872
ENSDARG00000006200	eif4g1a	-1.27497	9.68305e-06	-0.264398	0.687525	0.32141	0.711127	-0.150559	0.824863	-0.0546287	0.971211
ENSDARG00000006202	erbb3a	3.29489	0.0040317	0.668178	0.826895	-1.34409	0.656267	0.664399	0.781964	-0.492588	0.920435
ENSDARG00000006206	pou4f3	6.12068	0.104268	1.37152	0.875864	-0.999735	0.970291	-1.36056	#N/A	0.763022	0.956686
ENSDARG00000006207	gpx1b	-4.64403	0.362466	8.25929	0.129236	3.62439	#N/A	-7.43404	#N/A	1.87278	0.902771
ENSDARG00000006215	akr1b1	8.33751	4.6875e-17	-1.71378	0.317565	-1.71398	0.465198	8.20356	7.78334e-11	6.82682	5.19849e-07
ENSDARG00000006219	gnl3	-0.543701	0.509493	0.160056	0.945062	-0.165026	0.970291	1.04962	0.281546	0.495082	0.789412
ENSDARG00000006220	ugt1a7	3.64561	0.116007	5.69949	8.86638e-06	0.457321	0.975534	4.52348	0.206472	2.15542	0.312977
ENSDARG00000006220	ugt1a6	3.64561	0.116007	5.69949	8.86638e-06	0.457321	0.975534	4.52348	0.206472	2.15542	0.312977
ENSDARG00000006220	ugt1a2	3.64561	0.116007	5.69949	8.86638e-06	0.457321	0.975534	4.52348	0.206472	2.15542	0.312977
ENSDARG00000006220	ugt1a1	3.64561	0.116007	5.69949	8.86638e-06	0.457321	0.975534	4.52348	0.206472	2.15542	0.312977
ENSDARG00000006220	ugt1ab	3.64561	0.116007	5.69949	8.86638e-06	0.457321	0.975534	4.52348	0.206472	2.15542	0.312977
ENSDARG00000006225	ddx39aa	-0.897102	0.0303356	-0.157892	0.900482	-0.543834	0.542122	-0.551578	0.412161	-0.124833	0.947834
ENSDARG00000006235	brms1la	0.260182	0.781978	0.102155	0.96821	-0.544395	0.748741	-0.28919	0.812897	-0.415226	0.816366
ENSDARG00000006240	slc27a1a	-0.345508	0.711168	-0.325045	0.845789	0.574232	0.760896	1.05433	0.268301	-0.136034	0.96249
ENSDARG00000006242	ptp4a1	0.576681	0.2307	-0.118189	0.933976	0.3703	0.785025	0.20121	0.822738	0.447977	0.657469
ENSDARG00000006251	ell2	-2.25332	3.06292e-05	0.132642	0.95437	1.582	0.0659322	-0.491031	0.660254	0.341216	0.878653
ENSDARG00000006253	mier3a	-0.786528	0.251146	0.389831	0.783578	0.767459	0.568288	-0.752406	0.446377	0.447606	0.804302
ENSDARG00000006257	vldlr	2.64928	8.22868e-07	-0.810863	0.369675	-2.0974	0.00799699	-1.41794	0.0752137	-1.45515	0.101515
ENSDARG00000006260	tuba8l4	-1.43138	2.78784e-08	0.567838	0.139169	-0.10138	0.970291	-0.151534	0.805057	0.489898	0.357462
ENSDARG00000006266	stat1a	0.475023	0.569253	0.937834	0.295244	0.760848	0.610394	0.407511	0.740444	0.284693	0.90952
ENSDARG00000006272	mpp5a	-0.659312	0.232621	-0.940731	0.141019	-0.0101088	0.996321	0.138155	0.902802	-0.768853	0.402971
ENSDARG00000006279	rragd	5.01241	0.0213845	-1.71066	0.707094	-0.0832747	0.992426	5.93464	0.0505489	1.36463	0.854151
ENSDARG00000006283	waslb	-0.37185	0.826165	-0.156896	0.971471	-0.559494	0.919021	0.0492246	0.983923	-0.908139	0.724766
ENSDARG00000006288	prdm5	0.633974	0.602752	0.528637	0.810881	-1.5477	0.322905	-0.0475433	0.98331	-0.13651	0.973709
ENSDARG00000006290	ndufs5	1.22044	0.121563	0.586883	0.700335	-0.535574	0.854002	0.823016	0.512472	2.04239	0.0595736
ENSDARG00000006292	maats1	-0.0199386	0.999251	8.52439	0.111173	-7.24969	0.306742	-7.94861	#N/A	3.36025	0.744554
ENSDARG00000006299	arhgef7a	0.105796	0.957924	-0.0292216	0.990647	-0.852448	0.624317	-1.7213	0.0827789	-0.986621	0.508616
ENSDARG00000006300	psmd9	-0.670754	0.349424	0.620057	0.557331	0.476799	0.822022	1.05123	0.254577	1.22349	0.230766
ENSDARG00000006301	raph1a	1.60885	0.00353892	-0.291868	0.852584	-1.2343	0.181842	-0.590959	0.55462	-0.59467	0.668107
ENSDARG00000006307	shisa4	0.0403265	0.999251	-1.56804	0.623131	-0.84989	0.935928	-1.49532	0.621538	-2.7716	0.36508
ENSDARG00000006308	ptpn18	-1.36156	0.636937	3.66654	0.18078	1.14747	0.924044	-1.55906	#N/A	8.10016	0.0485295
ENSDARG00000006314	itgav	1.15163	0.00033461	0.076352	0.954559	-0.445279	0.567449	0.975205	0.0324354	-0.399092	0.608499
ENSDARG00000006316	rpl23a	0.517907	0.394263	-0.00537103	0.997352	-0.0768308	0.975737	1.09847	0.112376	0.732672	0.447271
ENSDARG00000006332	snx14	0.223674	0.833769	0.102212	0.969958	1.00228	0.389616	0.964322	0.315326	1.08529	0.322168
ENSDARG00000006341	tas1r3	4.23721	#N/A	-4.92586	#N/A	-5.02719	#N/A	3.65806	#N/A	-4.24781	#N/A
ENSDARG00000006345	med17	-0.994385	0.142538	0.292888	0.867415	-0.615506	0.719697	-1.40005	0.105213	0.216532	0.93772
ENSDARG00000006350	nkx1.2la	-0.0199383	#N/A	-0.668713	#N/A	-4.44225	#N/A	-0.599086	#N/A	-1.80521	#N/A
ENSDARG00000006353	itga5	-0.615085	0.172999	-0.484669	0.473252	1.01477	0.097014	1.01037	0.0695628	0.102069	0.95711
ENSDARG00000006356	slc18a3a	0.200197	0.994346	1.59814	0.842467	2.14129	0.87734	-1.91036	#N/A	7.26542	0.233104
ENSDARG00000006368	crlf1b	-1.38891	0.345114	-1.08479	0.652795	0.930717	0.837698	0.00244041	0.999242	-3.01693	0.103368
ENSDARG00000006370	atp6v1h	1.78143	4.82469e-06	0.0715226	0.969958	0.649254	0.487381	1.86684	0.000308144	1.84767	0.00089141
ENSDARG00000006372	ugt5c2	-0.0199383	#N/A	-0.668713	#N/A	-0.999683	#N/A	-0.599086	#N/A	-1.80521	#N/A
ENSDARG00000006383	stxbp5l	2.12566	0.213463	1.19573	0.701113	-0.889816	0.914673	-2.0301	0.3983	-0.0251551	0.997898
ENSDARG00000006385	triobpb	0.528778	0.469682	0.62271	0.528602	-0.047056	0.987209	0.955062	0.280577	1.65701	0.0474284
ENSDARG00000006389	smad2	-0.556063	0.364779	0.288814	0.826895	0.148095	0.970291	-0.685665	0.405919	-0.418996	0.767811
ENSDARG00000006392	exosc9	-1.99007	0.123682	0.515747	0.882052	0.858547	0.856949	-0.117129	0.966916	0.312292	0.955629
ENSDARG00000006395	rbm25b	-0.254749	0.688163	-0.0991957	0.951557	-0.422119	0.7254	-0.590283	0.396522	0.0229607	0.991248
ENSDARG00000006396	nrcama	10.8755	5.08232e-11	-0.0480837	0.97927	-10.7822	3.81262e-09	-2.6412	0.000260005	-1.39007	0.151069
ENSDARG00000006397	laptm4a	1.20165	0.0135997	-0.180679	0.904672	0.238791	0.946617	1.07045	0.126812	0.119677	0.959266
ENSDARG00000006399	ywhae1	0.81676	0.0101519	-0.298947	0.633222	-0.427776	0.547336	0.464457	0.371831	0.531188	0.378794
ENSDARG00000006408	hmgb3b	-0.290979	0.789446	1.43568	0.0855889	0.00541499	0.998283	0.115426	0.941594	2.00882	0.0327628
ENSDARG00000006409	mapk12b	-2.54462	0.0383446	1.68339	0.363721	-0.524337	0.958011	-0.542365	0.837668	2.48623	0.236012
ENSDARG00000006413	rpl38	0.432239	0.720644	0.184378	0.951469	-0.158181	0.972117	0.694611	0.637015	0.219993	0.952265
ENSDARG00000006420	atrnl1b	-0.535817	0.200159	-0.408844	0.52691	-0.396861	0.681104	-1.55842	0.000391548	-1.45179	0.00236795
ENSDARG00000006422	esyt3	1.78582	0.372761	0.703887	0.880987	-3.20265	0.242139	-0.681069	0.850301	-1.30752	0.777784
ENSDARG00000006427	fabp2	2.17416	0.201347	1.58968	0.546693	0.117433	0.987751	1.71215	0.511007	2.02743	0.513257
ENSDARG00000006434	polr1e	-1.53511	0.120597	-0.930714	0.580851	0.659387	0.856895	0.680482	0.705591	-1.08086	0.605083
ENSDARG00000006447	slc19a3a	-1.25376	0.875327	0.229157	0.986256	6.5633	#N/A	-0.0344396	#N/A	1.97919	0.911829
ENSDARG00000006456	pdgfrl	3.68027	8.28966e-08	-0.696469	0.625682	-1.41011	0.312527	-0.285036	0.865632	-1.64379	0.164115
ENSDARG00000006467	pcdh8	2.21325	0.233537	0.801026	0.856218	-4.98262	0.0237305	-2.61445	0.285784	-0.180939	0.982065
ENSDARG00000006468	grap2a	-2.29455	0.0265552	2.4953	0.0428447	5.14205	0.00208091	1.53109	0.400352	3.81088	0.0122747
ENSDARG00000006474	saxo2	5.40682	0.455304	-6.09548	0.544956	-4.44237	#N/A	-2.1385	#N/A	-8.15474	0.461509
ENSDARG00000006477	ddi2	-0.537119	0.28232	-0.0368201	0.97834	0.0987103	0.970291	0.034786	0.973317	0.425225	0.690943
ENSDARG00000006487	anp32a	-1.03311	0.00188377	0.452217	0.41779	0.290149	0.807161	-0.254815	0.708866	0.406727	0.608143
ENSDARG00000006491	agpat9l	1.58306	0.655307	1.84754	0.724586	0.761189	0.970291	0.594884	#N/A	0.682603	0.95096
ENSDARG00000006494	asb7	-1.13565	0.171553	0.130884	0.968781	-0.12351	0.975534	-1.18684	0.308097	-0.610108	0.774803
ENSDARG00000006497	rtn1a	2.42203	3.38344e-17	-0.148585	0.876019	-1.55571	0.00016984	-1.43269	0.00021535	-0.567508	0.342927
ENSDARG00000006501	cyp2x10.2	-0.0199383	#N/A	7.24677	#N/A	-0.999683	#N/A	-0.599086	#N/A	6.11027	#N/A
ENSDARG00000006508	pip5k1bb	-0.114214	0.937453	-0.737494	0.47154	2.48431	0.00202219	2.03518	0.0104373	2.84542	0.000559806
ENSDARG00000006514	her6	-0.234251	0.90966	-1.9444	0.144783	1.10267	0.665987	0.360308	0.874887	-0.984467	0.696006
ENSDARG00000006522	otop2	5.51516	0.402877	1.86296	0.903911	-5.44236	#N/A	-1.31398	#N/A	6.26148	0.608746
ENSDARG00000006524	supt6h	-0.255097	0.659514	-0.385141	0.609405	-0.599227	0.453598	-0.313308	0.681459	-0.4197	0.664528
ENSDARG00000006526	fn1b	3.65764	3.53528e-15	-0.704059	0.408075	-2.56851	8.96575e-05	2.70467	1.17488e-05	-1.04859	0.248467
ENSDARG00000006527	brd3a	-0.891805	0.0559092	-0.443464	0.596588	-0.945112	0.194636	-1.08603	0.0776318	-1.25341	0.0558368
ENSDARG00000006544	c1qtnf6b	-0.0199384	#N/A	-0.668716	#N/A	-0.999783	#N/A	-5.84905	#N/A	-5.83283	#N/A
ENSDARG00000006545	rgp1	1.7255	0.0206882	-0.308431	0.888276	-0.286368	0.970291	1.28967	0.254728	1.07457	0.475969
ENSDARG00000006546	ak4	1.85443	0.000398029	-0.654594	0.480857	0.280429	0.945567	3.0263	5.41771e-06	0.796803	0.489037
ENSDARG00000006553	rras	0.883692	0.0223457	-0.0839576	0.955629	-0.3578	0.764562	1.67592	0.000343282	-0.0911099	0.960975
ENSDARG00000006560	irf4a	5.19395	0.572254	-5.8826	0.662469	-0.999813	#N/A	-1.28726	#N/A	-4.24795	0.857692
ENSDARG00000006566	nlk1	0.279179	0.596366	-0.498419	0.410473	-0.975786	0.0848198	-0.864046	0.10377	-0.148335	0.929131
ENSDARG00000006567	dus4l	-0.706758	0.890456	0.344539	0.975012	0.648589	0.970291	1.19245	#N/A	0.847559	0.94319
ENSDARG00000006568	kcnmb2	-0.0199383	#N/A	6.66083	#N/A	-0.999683	#N/A	-7.04154	#N/A	5.52434	#N/A
ENSDARG00000006577	nadka	-0.885575	0.44692	0.815717	0.65135	1.54931	0.395599	-0.117345	0.958456	1.16094	0.577877
ENSDARG00000006580	cldnd	-0.0199383	#N/A	-0.668713	#N/A	-0.999683	#N/A	-0.599086	#N/A	-1.80521	#N/A
ENSDARG00000006584	phf8	-0.0735414	0.951232	-0.129938	0.934465	-0.759979	0.38811	-0.967556	0.147243	-0.522747	0.628726
ENSDARG00000006585	zmp:0000000529	0.320218	0.812528	0.120989	0.972448	-0.873359	0.669038	-0.845451	0.542227	-0.0307963	0.99451
ENSDARG00000006588	zgc:111983	6.41612	0.00915593	2.51542	0.349228	-0.999722	0.970291	5.83695	0.128853	-1.15127	0.841279
ENSDARG00000006598	sgk2b	2.13341	0.215487	1.3557	0.643949	0.150703	0.985091	2.38274	0.32568	2.40746	0.401445
ENSDARG00000006600	lsm14aa	-0.614871	0.206975	0.157025	0.905986	-0.174396	0.967971	-0.287101	0.737808	-0.171356	0.926523
ENSDARG00000006601	kaznb	1.98964	0.00666844	-0.449614	0.813764	-0.513884	0.878618	0.685739	0.61671	0.180561	0.959657
ENSDARG00000006602	chrna2a	4.55877	#N/A	-5.24742	#N/A	-6.90172	#N/A	-1.63291	#N/A	-1.80535	#N/A
ENSDARG00000006603	csrp1a	-1.81699	0.0914307	0.490827	0.863125	-0.310585	0.970291	-0.744698	0.707196	-1.41056	0.492469
ENSDARG00000006604	nectin3b	0.044363	0.999251	-2.06076	0.492461	-0.994007	0.921241	-0.0333977	0.993713	-2.32758	0.537183
ENSDARG00000006607	gpr27	1.28087	0.722072	0.448258	0.96445	-1.65874	0.864684	-2.2097	#N/A	-1.93631	0.766823
ENSDARG00000006609	map2k2a	-0.114442	0.957321	-0.364201	0.870065	0.435238	0.922646	0.444855	0.781738	-0.293965	0.931448
ENSDARG00000006615	hnf1ba	1.80943	0.294096	2.89978	0.121567	-3.14479	0.176548	-1.55224	0.533529	1.98519	0.499817
ENSDARG00000006617	napga	0.0552194	0.982049	-0.771003	0.418392	0.660965	0.66487	0.784319	0.429275	-0.279615	0.90942
ENSDARG00000006621	pspc1	0.481352	0.671845	-0.234447	0.925842	-1.77316	0.141125	-1.32921	0.255439	-0.895322	0.610664
ENSDARG00000006624	ppp2r2ab	-0.473435	0.371761	-0.197091	0.874908	-0.359561	0.808006	-0.308951	0.717697	0.192738	0.914868
ENSDARG00000006636	slitrk2	5.70225	0.0374254	1.25963	0.800681	-7.02734	0.0454994	-3.36396	#N/A	-3.22672	0.378794
ENSDARG00000006639	lnpk	0.078073	0.982049	0.831862	0.592416	-0.29533	0.970291	-0.276447	0.886228	0.774055	0.728371
ENSDARG00000006640	eomesa	8.49746	0.000238323	0.781963	0.876019	-9.55089	0.000744252	-2.25228	0.430793	-1.57445	0.729527
ENSDARG00000006642	drg2	-0.702496	0.462661	-0.393778	0.846883	0.124292	0.975534	-0.102157	0.955701	-0.798348	0.659365
ENSDARG00000006666	si:dkeyp-69c1.6	-0.45455	0.672634	-0.00237994	0.998761	-0.31731	0.960438	-0.686043	0.605816	-0.746247	0.679081
ENSDARG00000006672	fam49a	0.778787	0.406773	0.0287068	0.991089	0.491856	0.890597	0.32155	0.848176	0.0897591	0.980471
ENSDARG00000006677	ripk1l	0.768012	0.390077	-1.9049	0.024811	0.119854	0.975534	1.75873	0.0812573	-0.819811	0.630241
ENSDARG00000006678	pth2r	1.57959	#N/A	-2.26824	#N/A	-0.999807	#N/A	-4.24951	#N/A	-1.80533	#N/A
ENSDARG00000006683	arhgef6	-0.425633	0.524282	0.549576	0.534472	0.42299	0.807563	0.216027	0.848686	-0.223579	0.914571
ENSDARG00000006691	rpl12	0.568765	0.332245	0.0746195	0.972431	0.246079	0.939065	1.21952	0.0663816	1.82799	0.00411514
ENSDARG00000006712	wipf2b	0.792236	0.496373	0.0932215	0.977183	-3.06501	0.00868899	-1.23395	0.389385	-0.792932	0.737764
ENSDARG00000006719	specc1la	-1.10861	0.00151527	0.328198	0.65135	0.968758	0.0754267	-0.104214	0.903883	0.282973	0.798609
ENSDARG00000006747	tmem178b	1.13697	0.572839	0.011182	0.997581	0.259189	0.975504	-2.52314	0.259651	-1.19783	0.776168
ENSDARG00000006754	mllt3	-4.96832	2.11014e-05	0.287545	0.95437	2.02033	0.411117	-1.94086	0.3388	-1.96675	0.423117
ENSDARG00000006757	klhl41b	1.51174	0.199736	2.18849	0.0936838	-3.94401	0.0029139	-0.516954	0.813816	0.397137	0.928416
ENSDARG00000006758	fam234b	0.0419966	0.999251	-0.57429	0.840935	-1.29996	0.604547	-1.35875	0.444503	-0.0943291	0.986585
ENSDARG00000006760	slc24a3	0.610625	0.80852	1.40365	0.6196	0.481314	0.970291	-1.10221	0.701968	0.0211589	0.998309
ENSDARG00000006766	snd1	-0.0627415	0.90431	-0.117108	0.875386	-0.478678	0.286548	0.322032	0.457585	-0.0778485	0.947921
ENSDARG00000006773	elovl4a	0.118825	0.963259	-0.216316	0.948	-0.70989	0.822187	-2.92206	0.00900647	-0.432058	0.905316
ENSDARG00000006775	cass4	-3.04462	0.272327	0.96202	0.892581	-0.215944	0.985542	-1.2312	0.807075	-2.23957	0.709715
ENSDARG00000006782	rb1	-1.64273	0.000146931	0.255301	0.838906	-0.0632211	0.978923	-0.0538311	0.961354	-0.222095	0.90833
ENSDARG00000006786	copz2	1.2243	0.24666	1.16277	0.421986	-1.03762	0.651656	-0.602224	0.737808	-0.329673	0.933659
ENSDARG00000006791	arntl1a	0.714383	0.265064	-0.369132	0.775149	-0.0391893	0.987991	0.617444	0.517272	0.0653094	0.980522
ENSDARG00000006797	nt5dc1	1.82299	0.294682	-1.05485	0.752785	-0.630904	0.962285	0.693427	0.826212	0.303536	0.964896
ENSDARG00000006811	sult1st6	2.5766	0.677514	4.87254	0.427771	-0.999744	0.970291	1.99741	#N/A	-1.72479	0.907286
ENSDARG00000006812	wdr26b	0.70451	0.0900036	-0.332059	0.675935	0.106582	0.970291	0.597996	0.335246	-0.113893	0.949258
ENSDARG00000006816	gtf2f2b	-0.0199383	#N/A	-0.668713	#N/A	-0.999683	#N/A	-0.599086	#N/A	-1.80521	#N/A
ENSDARG00000006818	urod	-5.15475	1.62641e-36	-1.3282	0.0205279	2.40609	4.01055e-05	0.233143	0.826212	-0.167827	0.941202
ENSDARG00000006832	galnt9	8.45862	0.000200807	0.257609	0.972431	-0.999729	0.970291	-2.79201	0.276027	-0.597907	0.935483
ENSDARG00000006837	mycn	-1.27619	0.00374497	0.186142	0.892232	-0.729903	0.402037	-0.478406	0.552015	-0.209622	0.911294
ENSDARG00000006838	eef1a2	5.0433	#N/A	-5.73195	#N/A	-0.999683	#N/A	4.46416	#N/A	-1.80521	#N/A
ENSDARG00000006840	gnmt	4.24459	8.3269e-13	-0.775274	0.486434	-0.557196	0.829272	4.26406	4.68701e-08	2.87119	0.00127172
ENSDARG00000006848	parp9	-0.153397	0.99185	1.00678	0.867415	0.189854	0.985753	0.513592	#N/A	0.0722079	0.995691
ENSDARG00000006849	asic2	0.567921	0.938593	-2.14004	0.767827	6.06222	0.38811	0.0231035	#N/A	-0.654383	0.964704
ENSDARG00000006859	nkain1	1.73145	0.0958707	-1.38517	0.349292	-2.24157	0.139571	-0.677215	0.722069	-1.21486	0.568761
ENSDARG00000006862	kifap3b	0.841402	0.0975202	0.314099	0.779723	0.441642	0.773586	-0.75002	0.308964	0.0861214	0.969369
ENSDARG00000006863	si:ch1073-349o24.2	-0.156197	0.999251	-1.03718	0.929439	-1.04942	0.970291	-0.583436	#N/A	0.578898	0.973338
ENSDARG00000006865	glra4a	7.21094	0.0243198	1.32688	0.856132	-7.14281	0.124697	-0.810867	#N/A	0.978576	0.932815
ENSDARG00000006868	trh	5.25672	0.396905	1.80203	0.901034	-6.90174	#N/A	4.67757	#N/A	1.91458	0.924779
ENSDARG00000006869	stx17	1.07732	0.670547	1.9514	0.500913	-1.55795	0.773874	0.0602224	#N/A	1.04356	0.86283
ENSDARG00000006877	enpp4	-2.24309	0.0769486	1.29681	0.542502	2.67135	0.200606	0.526875	#N/A	1.80083	0.494965
ENSDARG00000006878	phf21aa	0.586438	0.533207	-0.889192	0.437814	-1.98785	0.0475399	-1.80491	0.057554	-2.03111	0.0448127
ENSDARG00000006889	mpped2a	1.193	0.295509	-1.30365	0.387374	-0.13375	0.978923	-0.272885	0.903295	-1.37112	0.480746
ENSDARG00000006891	kcns3a	4.70307	0.330454	-3.80233	0.614831	-0.999722	#N/A	-2.64065	#N/A	-0.215858	0.991929
ENSDARG00000006892	myo3b	-0.497193	0.897301	-0.13845	0.98053	-1.0779	0.921543	-0.961893	#N/A	-2.97337	0.417236
ENSDARG00000006894	oprk1	-0.0199384	#N/A	-0.668715	#N/A	-0.999792	#N/A	-6.36361	#N/A	-4.24792	#N/A
ENSDARG00000006896	lhx6	-2.38679	0.440624	3.38822	0.3698	1.12017	0.952047	-4.48991	0.215402	-1.90815	0.786708
ENSDARG00000006899	far1	3.43023	9.24614e-08	-0.9923	0.368792	-0.491726	0.878844	2.60233	0.003502	1.07259	0.447967
ENSDARG00000006900	impdh2	-2.16671	1.38576e-06	1.13238	0.0682178	1.07589	0.180143	-1.16633	0.0926052	0.808761	0.39839
ENSDARG00000006901	si:ch1073-459j12.1	4.74673	2.26211e-17	0.394359	0.77355	-3.39365	9.86664e-06	-1.92798	0.00872391	-1.77113	0.0292734
ENSDARG00000006911	wnt8b	-1.40962	0.827505	-4.6067	0.517699	-2.97266	0.815063	-3.56319	#N/A	-8.15478	0.209102
ENSDARG00000006915	arl8ba	0.126313	0.917609	0.260876	0.874908	1.64466	0.0537392	0.887516	0.334134	2.026	0.0112298
ENSDARG00000006921	lrp5	-0.519728	0.512836	-0.243667	0.892719	-0.513813	0.796834	-0.419882	0.724219	-1.11646	0.290396
ENSDARG00000006923	cacna1ab	8.58085	7.19256e-05	-1.72972	0.512686	-9.41965	0.000301206	-2.83328	0.209405	-2.54101	0.371404
ENSDARG00000006924	fbxo38	-0.164127	0.883009	-0.264475	0.874908	0.411478	0.866101	-0.104337	0.940386	-0.27021	0.910486
ENSDARG00000006939	tbx16l	-5.53593	0.00136641	-6.77724	0.0179378	2.26004	0.589217	-2.93733	0.298013	-7.4526	0.0172853
ENSDARG00000006944	gdpd3b	-5.9962	0.230729	8.73884	0.125121	4.97653	0.659551	-4.62672	#N/A	3.15965	0.788843
ENSDARG00000006963	cse1l	-0.26728	0.679854	0.30431	0.764464	-0.150856	0.970291	-0.110794	0.915686	0.103542	0.960975
ENSDARG00000006978	zak	0.753241	0.562604	-0.931209	0.604389	2.74735	0.0956714	1.59922	0.292017	-0.294732	0.947884
ENSDARG00000006981	ccdc113	6.34356	0.146962	-7.03223	0.200803	-6.76427	#N/A	0.321767	#N/A	-8.70731	0.150439
ENSDARG00000006983	celf3b	7.21599	0.000287582	-0.397669	0.95965	-7.13883	0.00874836	-1.90473	0.568082	-1.16933	0.860286
ENSDARG00000006990	creld1b	3.84416	0.134399	-7.26211	0.0145119	-3.64336	0.42611	-1.11868	0.821015	-7.89039	0.0229862
ENSDARG00000007009	hoxa11b	-2.8031	0.314813	3.03895	0.415736	1.9089	0.814094	-2.45345	#N/A	0.49737	0.963679
ENSDARG00000007018	ms4a17a.6	-5.73733	#N/A	-0.668721	#N/A	4.71768	#N/A	-4.04175	#N/A	-4.24791	#N/A
ENSDARG00000007024	uox	5.4928	0.00612654	6.18022	9.3955e-11	-0.999713	0.970291	-0.336391	0.898685	2.3064	0.109772
ENSDARG00000007025	ttc9c	-0.374828	0.944358	0.368882	0.969958	3.79602	0.397331	2.61935	#N/A	4.25815	0.326932
ENSDARG00000007034	hnrpkl	-0.0232165	0.997391	0.49509	0.439007	-0.658195	0.371469	-0.515973	0.429883	0.240241	0.864317
ENSDARG00000007040	tmigd1	-4.82106	#N/A	-0.668713	#N/A	3.80144	#N/A	-0.599086	#N/A	-1.80521	#N/A
ENSDARG00000007045	cnot4a	-0.177803	0.926303	-0.821762	0.622854	-0.430119	0.941624	-0.134094	0.949565	-0.576756	0.842873
ENSDARG00000007065	mrps18b	-0.51082	0.761663	0.000536766	0.9997	1.55744	0.484424	0.307973	0.901333	-0.622265	0.871594
ENSDARG00000007067	si:dkey-19a16.16	-0.0199383	#N/A	-0.668713	#N/A	-0.999683	#N/A	-0.599086	#N/A	-1.80521	#N/A
ENSDARG00000007077	ankrd50l	-0.144474	0.927132	0.257308	0.907147	-0.662105	0.757657	0.0494752	0.977754	-0.00825763	0.998582
ENSDARG00000007080	rhcgl1	4.82119	#N/A	-5.50984	#N/A	-0.999683	#N/A	4.24205	#N/A	-1.80521	#N/A
ENSDARG00000007081	pias4a	0.0922168	0.931732	-0.300891	0.794363	-1.01518	0.181015	-0.525836	0.517956	-0.140994	0.948821
ENSDARG00000007086	aqp10a	-6.23735	#N/A	-0.668713	#N/A	5.21773	#N/A	-0.599086	#N/A	-7.05506	#N/A
ENSDARG00000007092	xab2	-0.922856	0.0213176	0.522079	0.41184	-0.203066	0.937356	-0.238735	0.769795	0.917117	0.153731
ENSDARG00000007097	her13	4.38711	0.148026	-1.02266	0.903134	-6.44259	0.12648	-0.603365	0.925356	-1.29748	0.906773
ENSDARG00000007098	itm2ba	1.18123	0.000997071	0.299263	0.711416	0.41437	0.677958	0.838545	0.11883	0.856373	0.155155
ENSDARG00000007099	cx43.4	-0.909344	0.276691	0.0167195	0.994671	-1.49318	0.197873	-1.43149	0.166707	-0.391044	0.885402
ENSDARG00000007108	lipia	-0.0221287	0.999251	-6.68686	0.164377	-2.17692	0.865519	-1.11108	#N/A	-9.10588	0.0700683
ENSDARG00000007125	asb6	-2.51769	0.00681256	-0.415544	0.881796	1.63276	0.350893	-1.01186	0.545774	-0.581983	0.867085
ENSDARG00000007127	acat2	-1.09751	0.382122	0.600681	0.820863	0.925476	0.774712	-0.594379	0.776383	-0.153896	0.975231
ENSDARG00000007129	slc6a16a	-3.13904	0.000422572	0.755347	0.711653	2.47594	0.0811026	-2.32827	0.0731639	-1.06813	0.627445
ENSDARG00000007130	mrto4	-2.3264	0.284944	-0.0710308	0.991057	1.0932	0.912417	-0.485843	0.911694	-0.569216	0.946756
ENSDARG00000007135	cnot3a	-0.891758	0.0303295	-0.183801	0.876019	-0.16132	0.969973	-0.554654	0.404951	-0.476325	0.606574
ENSDARG00000007136	gtf2h4	-0.666068	0.537397	0.46255	0.827385	0.472825	0.916274	-1.9778	0.0715638	-1.21163	0.438942
ENSDARG00000007141	psmc3	-0.359114	0.434994	0.219527	0.813205	0.400719	0.670341	0.467571	0.445653	0.397592	0.649073
ENSDARG00000007149	l1cama	2.65989	0.00200025	0.171872	0.963984	-2.93971	0.0153618	-2.49447	0.0305415	-1.53536	0.328311
ENSDARG00000007151	kcnk2b	4.66074	0.282179	0.518409	0.971471	-6.24972	0.322472	-3.44852	#N/A	-1.18745	0.933659
ENSDARG00000007169	itgb1bp1	-0.173214	0.882138	0.265802	0.880917	1.07873	0.332466	1.94883	0.0150966	2.38885	0.00365103
ENSDARG00000007171	aig1	7.9992	0.00100851	1.04195	0.831739	-6.02734	0.0977919	0.517951	#N/A	1.67455	0.740886
ENSDARG00000007172	plxna3	-0.748002	0.0942306	0.103768	0.947246	-0.850683	0.219546	-2.22339	2.73183e-06	-1.16547	0.0561903
ENSDARG00000007175	recql	0.918508	0.319304	0.62236	0.700624	-2.06445	0.0649639	0.0977333	0.95818	0.199835	0.955629
ENSDARG00000007179	sash1a	-0.00296897	0.999251	0.11709	0.928119	0.285408	0.856895	0.95438	0.0798707	0.914995	0.142504
ENSDARG00000007180	slc30a4	0.926681	0.11874	0.0111076	0.994782	1.29871	0.147074	1.54251	0.0368422	1.37487	0.107483
ENSDARG00000007181	nadk2	-0.838999	0.336113	0.413869	0.827405	0.754484	0.704077	0.108627	0.951242	0.663135	0.737208
ENSDARG00000007184	zbtb16a	-3.16747	3.7365e-10	-0.209523	0.907147	-0.669715	0.628047	-1.67581	0.0266675	-0.175997	0.947884
ENSDARG00000007186	ppp1r8a	-0.393268	0.85669	-1.08626	0.642902	0.000284958	0.999808	-0.650502	#N/A	-0.804715	0.84176
ENSDARG00000007195	grm2b	0.45307	0.780569	1.02141	0.565742	-2.22325	0.152012	-2.32363	0.0860931	-1.71936	0.32521
ENSDARG00000007196	rae1	-0.564293	0.520348	-0.819341	0.455752	-0.091656	0.978923	-0.38491	0.778064	-1.28878	0.262026
ENSDARG00000007198	mta1	-0.563015	0.265355	0.0504808	0.976535	-0.379413	0.786886	-1.08353	0.0653592	-0.800241	0.29332
ENSDARG00000007199		-0.0199383	#N/A	3.37416	#N/A	-0.999683	#N/A	-0.599086	#N/A	2.23766	#N/A
ENSDARG00000007207	cnpy2	0.313785	0.850543	1.2752	0.367501	0.131661	0.978364	-1.83714	0.167213	0.83204	0.734783
ENSDARG00000007216	abce1	-1.86476	1.34322e-11	-0.0984074	0.92292	0.656611	0.204193	0.0576969	0.940028	0.0607747	0.96721
ENSDARG00000007217	wdr55	-0.517931	0.89812	-0.337614	0.97031	-0.0756825	0.992426	0.978938	#N/A	-1.09541	0.889098
ENSDARG00000007219	actn1	1.21422	0.000160727	-0.167513	0.863032	-0.8559	0.103654	1.21183	0.0054117	-0.349106	0.683162
ENSDARG00000007220	ncam1b	1.2598	0.294096	1.24036	0.447291	-5.2582	1.08887e-05	-3.16215	0.0129741	-1.13468	0.618432
ENSDARG00000007221	pbk	-1.51468	0.205918	1.30388	0.452591	-0.0242413	0.996085	-0.414572	0.863433	0.177096	0.971865
ENSDARG00000007231	ryk	0.20018	0.861895	0.273121	0.880894	-0.650354	0.699428	0.143959	0.923209	0.158578	0.956667
ENSDARG00000007241	mycb	0.411445	0.631222	0.184864	0.924992	0.291642	0.946617	1.17027	0.191343	2.04536	0.0144584
ENSDARG00000007244	acp2	0.766528	0.203206	1.15266	0.0800063	0.402264	0.860197	0.077844	0.951684	1.47376	0.0628026
ENSDARG00000007245	rundc3aa	8.77489	1.56515e-05	-1.22014	0.642218	-8.24973	0.000965498	-0.291327	0.926826	-2.27129	0.353265
ENSDARG00000007247	ric8a	2.09597	0.31175	1.52527	0.650485	-0.622604	0.970291	-1.80651	0.54415	-0.894334	0.893345
ENSDARG00000007250	use1	-1.13731	0.175368	1.02886	0.3788	0.617122	0.815063	-1.03253	0.402966	0.0611363	0.987751
ENSDARG00000007257	rab5ab	0.574094	0.33814	-0.907715	0.17919	-0.100364	0.972117	0.795273	0.311492	-0.518981	0.673709
ENSDARG00000007264		0.563932	0.461989	0.11797	0.963584	-0.548111	0.768148	0.477745	0.676956	-0.178281	0.948619
ENSDARG00000007271	mynn	-1.70437	0.00111943	0.0447129	0.978933	0.392599	0.861138	-1.02213	0.214582	-0.081894	0.976184
ENSDARG00000007275	si:ch211-251b21.1	9.41219	7.0848e-120	0.114287	0.948614	-1.87123	0.00362374	4.49989	2.73469e-19	2.8862	1.46279e-07
ENSDARG00000007276	ela3l	-0.0199383	#N/A	7.34236	#N/A	-0.999683	#N/A	-0.599086	#N/A	0.763376	#N/A
ENSDARG00000007277	myf5	-1.40837	0.637517	0.796777	0.902929	-2.54126	0.598986	-2.21457	#N/A	-2.55247	0.574279
ENSDARG00000007278	ect2	-2.96317	1.1798e-07	-0.311638	0.858775	0.802567	0.569015	-1.45723	0.0946325	-1.4386	0.146858
ENSDARG00000007279	yipf5	0.921936	0.219256	0.0484071	0.980086	-0.138812	0.970944	0.317848	0.821759	0.528555	0.783612
ENSDARG00000007285	mrpl57	-0.332436	0.940986	-1.12466	0.814992	-0.00117686	0.999611	0.302667	#N/A	-1.49269	0.785307
ENSDARG00000007289	metrnlb	-1.329	0.753591	-2.40771	0.652346	-0.265896	0.984824	0.503724	#N/A	-2.44142	0.73543
ENSDARG00000007294	aco2	-0.236611	0.688142	0.264881	0.77856	0.086852	0.970291	-0.351176	0.631752	0.034026	0.987017
ENSDARG00000007302	sh3gl3b	-0.28682	0.849393	1.1225	0.393208	1.4328	0.374371	0.874653	0.559697	2.18907	0.0919461
ENSDARG00000007315	tmpoa	-0.544357	0.565489	-1.14837	0.249411	-0.601394	0.792315	0.0532047	0.975302	-1.34839	0.262772
ENSDARG00000007320	rpl7	-0.104382	0.90966	0.357259	0.706461	-0.181733	0.967287	0.633176	0.382284	0.81188	0.303257
ENSDARG00000007323	chmp4bb	2.05	9.67574e-08	-0.0623182	0.972815	0.226618	0.933979	2.03524	5.17708e-05	1.90353	0.000451634
ENSDARG00000007329	tbx16	-6.74007	0.51128	-0.668713	0.97834	-3.29177	#N/A	-0.599086	#N/A	-1.80521	0.961269
ENSDARG00000007344	tcap	3.32547	0.285789	-2.47732	0.624426	5.0187	0.454251	3.15214	#N/A	2.3073	0.773119
ENSDARG00000007347	degs1	1.68298	4.79774e-06	-1.08928	0.0205746	0.128793	0.970291	2.26756	9.25822e-07	1.09879	0.0717459
ENSDARG00000007349	dmrt1	5.77994	#N/A	0.063858	#N/A	-3.44238	#N/A	5.20068	#N/A	-1.17476	#N/A
ENSDARG00000007356	fgf20a	5.06803	0.562351	-5.75668	0.651358	-6.90167	#N/A	4.48888	#N/A	-8.64006	0.51025
ENSDARG00000007358	cxcr3.1	5.4171	#N/A	-6.10575	#N/A	-0.999683	#N/A	4.83795	#N/A	-1.80521	#N/A
ENSDARG00000007359	zgc:56596	-0.477872	0.886483	0.797709	0.872181	0.0616343	0.992657	-0.345872	0.932971	0.818187	0.90833
ENSDARG00000007362	sft2d1	0.208559	0.852651	-0.383825	0.804568	1.77122	0.050781	2.27232	0.0037203	0.821598	0.537425
ENSDARG00000007366	si:ch73-71d17.1	6.18898	0.0501637	2.75801	0.520974	-6.7643	0.130051	5.60981	#N/A	7.83039	0.111018
ENSDARG00000007369	tcf7l1b	-0.852276	0.351201	-0.369076	0.861419	-0.736611	0.731042	-0.416985	0.789311	-1.21235	0.39473
ENSDARG00000007370	dysf	-3.5212	6.12027e-09	0.369762	0.841686	1.60685	0.125416	-0.783304	0.510537	0.210776	0.947921
ENSDARG00000007371	slc26a3.1	-0.0199383	#N/A	-0.668713	#N/A	-6.02715	#N/A	-6.36349	#N/A	-1.80521	#N/A
ENSDARG00000007377	odc1	-2.46946	4.1099e-11	1.13635	0.0229858	0.321313	0.842117	-0.474293	0.522927	1.14808	0.0722825
ENSDARG00000007382	ubtd1a	0.433731	0.935369	1.46705	0.792194	5.87614	0.261779	-0.235778	#N/A	0.310515	0.977953
ENSDARG00000007383	kcnk6	-3.19641	0.213368	-0.174206	0.979775	0.95231	0.963102	-1.06456	#N/A	-3.36116	0.443996
ENSDARG00000007385	cct7	-0.963279	0.0215456	-0.00349071	0.997581	0.0562346	0.978923	0.150182	0.874941	0.0200191	0.992669
ENSDARG00000007387	irf2a	-0.620086	0.741274	-0.650482	0.840389	0.434443	0.970291	-0.371038	0.893747	-0.854602	0.823275
ENSDARG00000007396	rnd3b	0.565218	0.602293	0.599985	0.721472	0.669955	0.803018	0.447618	0.781118	0.0293643	0.99451
ENSDARG00000007398	lrrk1	2.00159	0.307562	0.699676	0.885092	-0.644628	0.970291	0.953364	0.777419	0.804406	0.904157
ENSDARG00000007405	strap	0.108263	0.929208	0.0132219	0.994611	-0.311978	0.917319	0.022399	0.985997	0.134224	0.958278
ENSDARG00000007406	phox2a	1.926	0.10791	0.60278	0.831952	-2.43817	0.167524	-2.05991	0.191914	-1.57952	0.453783
ENSDARG00000007407	barx1	-1.69154	0.134907	1.69129	0.252167	0.177727	0.975504	-3.21758	0.0147873	-2.75907	0.0633046
ENSDARG00000007409	ppifa	0.251208	0.952467	-2.76862	0.228847	-0.151253	0.985413	1.42097	#N/A	-1.78555	0.652318
ENSDARG00000007412	slc2a1b	2.67353	0.000171051	-1.46984	0.147157	1.35563	0.356619	1.79678	0.0904389	-0.890833	0.607147
ENSDARG00000007413	arid2	-0.851941	0.12215	-0.451075	0.653426	-0.645005	0.578277	-1.53691	0.0198419	-0.95707	0.278408
ENSDARG00000007418	chmp4c	7.25913	0.0372607	1.02635	0.909698	-6.9018	0.194636	-0.762676	#N/A	0.141281	0.992548
ENSDARG00000007421	ftcd	7.22694	7.32889e-05	4.88999	8.60449e-10	-5.02734	0.0640907	-1.37984	0.300743	2.77632	0.0139435
ENSDARG00000007425	apol1	4.83946	1.24978e-13	-0.649631	0.652346	6.99269	0.0194463	7.00268	1.09561e-12	3.45305	0.000291574
ENSDARG00000007429	ndor1	-0.772204	0.358556	0.594607	0.670435	0.546789	0.827584	-0.265279	0.866896	1.13767	0.392364
ENSDARG00000007430	prdm12b	1.29438	0.53139	-0.522441	0.914184	-4.42241	0.0428856	-2.04696	0.420277	-1.57411	0.677861
ENSDARG00000007436	avpr2aa	-0.0199387	0.999251	9.44529	0.00288496	-0.999732	0.970291	-7.21168	#N/A	-0.491439	0.963628
ENSDARG00000007438	ube2ib	-0.386494	0.508259	0.246101	0.835327	-0.319073	0.859537	-0.246392	0.789314	-0.353046	0.786337
ENSDARG00000007443	fbxl18	-1.11973	0.231325	-0.124816	0.972431	0.560739	0.875793	-0.298901	0.873799	1.36078	0.415053
ENSDARG00000007444	ift81	-0.389211	0.927253	-0.15351	0.979053	-0.471345	0.970291	-1.44	0.697414	-0.740158	0.929042
ENSDARG00000007449	slc25a39	-1.63213	0.0811972	-1.19935	0.389721	1.14457	0.565839	-0.818154	0.61239	-0.633865	0.823607
ENSDARG00000007461	srgap1a	0.615221	0.230996	-0.543525	0.461476	-1.60119	0.00629016	0.686375	0.334574	-0.513762	0.617349
ENSDARG00000007465	tdrd1	3.60657	#N/A	-4.29522	#N/A	-7.90155	#N/A	3.02742	#N/A	-5.83271	#N/A
ENSDARG00000007467	ifit10	-0.0199383	#N/A	-0.668713	#N/A	-0.999683	#N/A	-0.599086	#N/A	-1.80521	#N/A
ENSDARG00000007477	fbxo8	0.997092	0.41816	1.18756	0.459606	0.454545	0.955284	-0.270766	0.905635	1.55269	0.409231
ENSDARG00000007480	rpe65a	5.05247	0.000782006	-1.70907	0.535835	-0.477607	0.970291	4.44793	0.0366669	4.44935	0.0861049
ENSDARG00000007485	epc2	-1.0119	0.0151393	-0.184147	0.880146	0.331234	0.826771	-0.792813	0.203735	-0.319746	0.803661
ENSDARG00000007490	adrb1	1.89865	0.605933	-0.928347	0.910012	6.5008	0.251767	1.98505	#N/A	0.326631	0.980117
ENSDARG00000007494	st3gal8	-0.217459	0.77358	0.0309922	0.982016	1.0391	0.168644	0.888312	0.204631	0.932379	0.246302
ENSDARG00000007496	ufl1	-0.0906094	0.937992	-0.239138	0.861622	0.738698	0.4642	0.557388	0.513731	-0.0331715	0.989695
ENSDARG00000007523	kmt2e	-0.193542	0.861704	-0.0403385	0.982016	-0.615618	0.708818	-1.11333	0.21615	-0.436668	0.817064
ENSDARG00000007526	ndufs2	0.136189	0.874992	0.485656	0.552203	0.183781	0.969749	0.608817	0.425065	1.325	0.0471529
ENSDARG00000007531	zcchc9	-0.279616	0.905232	-0.806209	0.764046	-0.521104	0.95408	1.04982	0.627997	-0.647459	0.884581
ENSDARG00000007534	itln1	-4.73349	#N/A	1.01237	#N/A	3.71374	#N/A	-0.599218	#N/A	-0.124257	#N/A
ENSDARG00000007553	opn4.1	5.00444	0.281033	1.86056	0.846569	-0.999743	0.970291	-1.1873	#N/A	-3.53971	0.68019
ENSDARG00000007560	sema3bl	0.395943	0.700457	0.807325	0.479351	-1.15846	0.360668	-2.09685	0.0170096	-1.96349	0.043267
ENSDARG00000007561	cdh23	-1.55037	0.324483	1.96723	0.313141	-0.0863828	0.988464	-1.15848	0.635707	0.979139	0.807201
ENSDARG00000007566	appbp2	-0.0461753	0.97477	-0.24956	0.823083	-0.21937	0.936732	-0.186944	0.843166	-0.0118338	0.996411
ENSDARG00000007576	crybb1l1	0.853966	0.8058	2.9796	0.335749	-1.74539	0.800527	-1.51526	0.704226	1.88383	0.727622
ENSDARG00000007582	si:ch1073-155h21.1	-7.64722	#N/A	-0.668714	#N/A	0.185121	#N/A	-5.04163	#N/A	-1.80521	#N/A
ENSDARG00000007597	bloc1s4	3.12108	0.0003338	-1.03111	0.517015	-0.20203	0.970924	2.16968	0.0929787	1.80758	0.267662
ENSDARG00000007601	zmynd8	1.38083	0.0449544	1.45191	0.0800744	-1.18971	0.323524	-1.0621	0.300329	0.614689	0.721284
ENSDARG00000007603	stxbp2	1.19764	0.00112326	-0.268799	0.763637	0.846724	0.192473	2.48812	1.6904e-08	1.44509	0.00556992
ENSDARG00000007614	wwox	1.94156	0.109284	-0.231386	0.96032	2.61162	0.245356	1.48189	0.429026	1.68136	0.462025
ENSDARG00000007624	gins1	-3.82984	0.111732	0.911505	0.892266	1.39304	0.898334	0.113021	0.983923	-1.18533	0.891687
ENSDARG00000007630	mkrn2	-0.666394	0.604929	-0.125683	0.973716	-0.214133	0.970291	-0.975251	0.547145	-1.10182	0.59486
ENSDARG00000007639	cnot4b	-0.135957	0.914847	-0.436551	0.750658	0.0573113	0.985303	0.0234596	0.986677	-0.485857	0.783317
ENSDARG00000007654	nsfa	5.54648	2.18552e-08	0.784	0.69641	-4.74396	0.000381621	-2.51943	0.0499057	-0.130046	0.978116
ENSDARG00000007655	crybb1l3	-5.90012	#N/A	-0.668713	#N/A	4.8805	#N/A	-4.62659	#N/A	-8.33512	#N/A
ENSDARG00000007657	ccnh	-0.873473	0.636642	0.201669	0.972102	1.23645	0.749595	-0.165245	0.95818	0.350469	0.9542
ENSDARG00000007663	amph	4.05105	0.00145883	1.22946	0.608402	-3.78831	0.0435452	-2.52993	0.171779	-0.497039	0.928383
ENSDARG00000007671	ghrb	-0.321203	0.862052	1.80869	0.187917	1.61735	0.423944	0.564697	0.78786	0.420919	0.921453
ENSDARG00000007678	ttyh3b	1.19532	0.147933	-0.535968	0.753537	-1.46562	0.248131	-2.08818	0.0347612	-1.77115	0.12754
ENSDARG00000007682	ppdpfa	1.56758	0.081224	1.09238	0.417676	0.319188	0.970291	0.629253	0.703395	0.835474	0.692622
ENSDARG00000007691	cul1b	-0.311457	0.630057	-0.436976	0.614831	0.390581	0.798076	-0.549743	0.475322	-0.356338	0.793668
ENSDARG00000007693	nfkbiab	2.24362	9.70633e-11	1.04255	0.022944	-0.60929	0.440493	1.75676	0.000167017	2.46485	6.17074e-08
ENSDARG00000007697	fabp7a	10.9194	9.02974e-11	1.29335	0.174728	-10.3612	3.89057e-08	-1.91942	0.0401066	-0.79773	0.620787
ENSDARG00000007708	nsa2	-0.0922329	0.929152	0.591786	0.427442	0.0947224	0.971231	0.352069	0.693874	0.56316	0.581694
ENSDARG00000007709	adamts8a	0.271745	0.935982	0.459842	0.921354	1.29081	0.794579	-0.218519	0.950251	-0.198813	0.977953
ENSDARG00000007711	rab3il1	3.85906	2.85737e-09	-1.09177	0.317648	0.773937	0.702316	5.33595	5.92262e-11	3.36162	0.000286032
ENSDARG00000007715	lgsn	1.5797	#N/A	-2.26835	#N/A	-0.999683	#N/A	1.00055	#N/A	-1.80521	#N/A
ENSDARG00000007720	sub1b	1.09715	0.659758	-0.0968582	0.985296	-1.05818	0.902364	0.770728	0.837668	-1.07446	0.856101
ENSDARG00000007722	nudt8	0.0659862	0.997826	-0.699088	0.810881	0.255972	0.970291	0.695205	0.767718	0.283596	0.959321
ENSDARG00000007723	efnb1	0.2943	0.700457	0.537299	0.551629	-1.53278	0.0299793	-1.13203	0.113025	-0.231323	0.911928
ENSDARG00000007727	rgl2	-1.5671	0.0015392	-0.803772	0.294975	2.15753	0.0011925	1.67632	0.0146336	0.892173	0.376185
ENSDARG00000007734	stn1	-0.599417	0.67652	1.19076	0.458397	0.512033	0.933979	1.33317	0.425598	1.71348	0.345971
ENSDARG00000007737	zyg11	-0.752985	0.581875	0.0887497	0.97834	0.532689	0.931242	0.134168	0.956198	-0.825855	0.769616
ENSDARG00000007739	atp1a1a.2	7.88812	8.54708e-05	-0.0879044	0.982016	-11.3248	5.88845e-07	-4.1249	0.0143119	-5.45401	0.000984604
ENSDARG00000007743	il15l	8.65728	0.0108473	-6.08495	0.137336	-5.02734	0.462687	3.63546	#N/A	-5.7418	0.278145
ENSDARG00000007744	tsr1	-2.29108	6.01478e-10	1.03658	0.0407687	0.417278	0.720947	-0.139391	0.887275	1.00038	0.137671
ENSDARG00000007745	uqcrfs1	0.808926	0.102244	-0.0788694	0.969072	-0.237861	0.935976	1.00135	0.128429	0.884702	0.268767
ENSDARG00000007751	lmnl3	2.87386	0.00614699	-0.561913	0.837703	-0.649187	0.919568	2.64523	#N/A	4.8678	0.0614153
ENSDARG00000007753	cpne2	0.237779	0.968364	1.38976	0.746805	-1.51541	0.829939	-2.71505	0.371568	-1.58971	0.756224
ENSDARG00000007755	wdr61	-0.126112	0.966337	-0.556365	0.834916	-0.598471	0.910164	-0.231881	0.922723	-0.0552291	0.991248
ENSDARG00000007760	spg21	1.71015	0.00649119	-0.94429	0.326949	0.698317	0.689106	2.73173	0.000490819	1.2344	0.278359
ENSDARG00000007764	klhdc10	0.589179	0.477409	-0.383781	0.814845	0.239502	0.970291	-0.0933671	0.951817	-0.261892	0.924666
ENSDARG00000007769	sult5a1	-4.00932	0.488884	-4.25814	0.652795	6.57907	#N/A	2.99029	#N/A	-5.83286	0.569055
ENSDARG00000007774	vash2	0.240234	0.699436	0.0560825	0.973716	-0.643732	0.430822	0.610951	0.364315	0.553626	0.53433
ENSDARG00000007783	blk	-3.25472	0.431054	3.1604	0.60924	6.82359	0.314794	0.546749	#N/A	6.61239	0.338915
ENSDARG00000007786	tmx2b	0.0629025	0.971535	0.0215513	0.991034	0.854255	0.438208	-0.701565	0.443524	-0.705801	0.550345
ENSDARG00000007787	zgc:112965	-0.0199383	#N/A	5.70014	#N/A	-4.44225	#N/A	-5.84894	#N/A	1.12108	#N/A
ENSDARG00000007788	atp2b1b	1.06843	0.521134	3.78028	0.00571422	-0.618646	0.946464	-2.8606	0.0943416	-0.263787	0.963189
ENSDARG00000007791	ppp2r1ba	0.640784	0.175363	-0.00542584	0.996633	-0.381248	0.775557	0.863752	0.160603	0.588186	0.498952
ENSDARG00000007795	cst3	2.44668	2.84838e-06	0.250663	0.879638	0.707322	0.634879	1.48003	0.0583814	1.20741	0.202757
ENSDARG00000007804	gas6	-0.960582	0.741692	-1.22829	0.784183	-0.53134	0.970291	-0.377703	0.932026	-2.47785	0.526547
ENSDARG00000007807	cyth3a	-0.648578	0.709407	0.348076	0.926134	2.16607	0.302427	-0.383881	0.885395	0.137254	0.980471
ENSDARG00000007808	zdhhc16a	1.83862	0.24489	0.7081	0.848505	-1.48408	0.675985	-1.06621	0.681042	0.852644	0.857141
ENSDARG00000007812	sp3b	-0.688959	0.2069	-0.0226171	0.98865	-0.128781	0.970291	-0.647667	0.414484	-0.504958	0.667106
ENSDARG00000007813	rnpepl1	-0.110859	0.962776	-1.33499	0.256382	1.01439	0.602135	1.09506	0.423109	-0.594147	0.819987
ENSDARG00000007818	palm1b	1.49497	0.00198695	-0.783958	0.288385	1.22047	0.126339	1.54487	0.0191001	1.35853	0.0741881
ENSDARG00000007823	atf3	0.507004	0.741274	-1.31404	0.396467	2.64023	0.0729589	2.39786	0.0775989	2.36839	0.13738
ENSDARG00000007824	camta1b	2.56039	0.0669888	0.193835	0.972815	-0.400815	0.970291	-2.10679	0.306426	0.374034	0.951344
ENSDARG00000007825	map2k1	0.244014	0.880254	0.236156	0.934665	-0.668048	0.829303	-0.777714	0.616173	-0.517488	0.864065
ENSDARG00000007836	ctsla	2.62191	3.18204e-09	-0.604989	0.466493	0.405672	0.817701	3.02084	6.08537e-08	2.42544	7.47578e-05
ENSDARG00000007842	si:dkey-165n16.5	-0.0199383	#N/A	-0.668713	#N/A	-0.999683	#N/A	-0.599086	#N/A	-1.80521	#N/A
ENSDARG00000007856	rtn4rl1a	-0.0199384	#N/A	-0.668715	#N/A	-0.999686	#N/A	-3.0417	#N/A	-1.80522	#N/A
ENSDARG00000007863	tra2a	-0.231981	0.699436	0.24007	0.814942	-0.39699	0.725327	-0.667268	0.277965	0.445138	0.637527
ENSDARG00000007864	pimr195	-2.45548	0.681745	-5.75336	0.414781	0.492885	#N/A	2.04288	#N/A	-1.80525	0.930417
ENSDARG00000007867	dazap2	1.06317	0.044089	-0.00625455	0.996953	0.819395	0.417847	0.569762	0.520318	0.457841	0.740501
ENSDARG00000007869	ehd3	0.793959	0.262589	0.861457	0.349978	-1.23915	0.218674	-1.0981	0.223947	-0.0939553	0.973946
ENSDARG00000007885	fancl	-3.8985	0.286119	-5.87571	0.249547	0.598802	0.973032	-1.29419	#N/A	-7.2479	0.196518
ENSDARG00000007886	slc35b2	-0.815225	0.772579	-1.18685	0.773386	0.383097	0.970291	-0.811276	0.829508	-1.99592	0.619242
ENSDARG00000007891	meox1	-0.972237	0.380112	-0.330183	0.906287	-1.92302	0.179403	-1.59103	0.239838	-3.23963	0.0058197
ENSDARG00000007892	pdcd2	-1.03621	0.43983	0.642177	0.811466	-0.604049	0.917319	0.660712	0.765371	-0.418967	0.927254
ENSDARG00000007901	crnkl1	-0.12846	0.938753	0.756877	0.537336	-0.96709	0.517154	-1.39689	0.168699	-0.00894631	0.998488
ENSDARG00000007906	lrp2b	4.55854	#N/A	-5.24719	#N/A	-0.999808	#N/A	3.97927	#N/A	-1.80534	#N/A
ENSDARG00000007912	si:ch211-196i2.1	-0.103784	0.952838	-1.48042	0.0809239	1.33932	0.258382	-0.409498	0.762144	-2.76839	0.00111709
ENSDARG00000007916	xpnpep3	0.0423599	0.999251	0.608195	0.82799	0.0364033	0.993382	0.0842785	0.97472	-0.429922	0.925599
ENSDARG00000007918	ttc27	-2.46647	3.33565e-06	1.55274	0.0236881	0.434314	0.847069	-0.76732	0.433173	0.924945	0.412265
ENSDARG00000007923	ptpn1	-1.01985	0.061511	0.314617	0.814041	0.0723846	0.978761	-0.113264	0.927526	-0.0539816	0.984596
ENSDARG00000007941	hmx4	0.271437	0.949794	0.291258	0.968911	-0.666028	0.970291	-1.90365	0.510537	0.0428201	0.996795
ENSDARG00000007943	gabpb2a	-1.35043	0.0645512	0.681363	0.60257	0.500747	0.859953	-0.31951	0.834765	0.201981	0.949975
ENSDARG00000007944	lhx1b	6.72334	0.0445781	1.071	0.897279	-8.86862	0.0409923	-3.91316	#N/A	0.14764	0.991248
ENSDARG00000007950	itga11b	0.68163	0.764859	0.321222	0.954127	4.04362	0.137891	0.719546	0.813148	-0.199682	0.977458
ENSDARG00000007955	iars	-1.64864	3.35227e-05	0.155401	0.90844	0.646225	0.459738	0.40271	0.612213	0.211518	0.904923
ENSDARG00000007959	hibadhb	0.0676455	0.93909	-0.569641	0.298536	0.251772	0.88224	0.585999	0.324429	0.30409	0.785768
ENSDARG00000007960	hnrnpaba	-0.185358	0.778422	-0.123847	0.924913	-0.950929	0.126339	-1.17963	0.0259148	-0.783384	0.255954
ENSDARG00000007971	cks1b	-1.38921	0.220908	0.494146	0.858137	-0.0959019	0.985091	-0.0645605	0.979883	-1.26313	0.554664
ENSDARG00000007975	fth1b	1.65194	0.120265	2.30361	0.0457656	-0.17171	0.975534	-0.123067	0.95818	2.52945	0.0823949
ENSDARG00000007976	si:ch211-220f16.2	0.0446661	0.99332	0.211347	0.918186	-0.0323068	0.990833	-0.410202	0.751452	-0.05876	0.986076
ENSDARG00000007982	onecut1	1.25722	0.692245	-9.61088	0.00119115	-3.44978	0.391291	-1.87438	0.632482	-9.73976	0.00363441
ENSDARG00000007988	masp2	5.23949	0.322109	2.28809	0.830682	-0.999696	#N/A	-1.68918	#N/A	0.646442	0.973424
ENSDARG00000007989	nedd8	1.42955	0.0838801	-0.0161958	0.994676	-0.310397	0.970291	0.239044	0.894751	1.0957	0.493334
ENSDARG00000007990	wt1b	2.42119	0.24675	-0.847639	0.867415	2.06489	0.697765	2.58471	#N/A	0.582968	0.943092
ENSDARG00000007996	pou2f1b	0.0179659	0.999251	-0.113796	0.962507	-2.00557	0.0068502	-2.0383	0.00352052	-1.39527	0.10584
ENSDARG00000008010	zgc:194189	-0.495587	#N/A	-5.73195	#N/A	4.5391	#N/A	-0.978422	#N/A	-4.2479	#N/A
ENSDARG00000008014	nudt17	0.404744	0.891781	-3.42294	0.0781893	0.717011	0.948671	-0.143581	0.968056	-2.98196	0.260807
ENSDARG00000008019	mxg	-4.26487	#N/A	-3.2909	#N/A	5.86744	#N/A	2.0231	#N/A	-1.80521	#N/A
ENSDARG00000008020	med31	0.132243	0.948986	-0.301687	0.904621	-0.739848	0.772165	-0.244385	0.898218	-0.276151	0.939891
ENSDARG00000008022	kif18a	-2.72727	0.000203908	0.717925	0.643953	0.142828	0.974198	-1.23635	0.320773	-0.574327	0.815547
ENSDARG00000008026	fam129bb	0.524448	0.371837	-0.868123	0.185811	0.63909	0.546928	2.2403	7.35037e-05	0.436332	0.733977
ENSDARG00000008030	myl9b	0.470182	0.537934	-0.708132	0.448786	1.0911	0.275539	1.28954	0.111463	-0.483608	0.762231
ENSDARG00000008032	sart3	-1.55974	0.000765278	0.403248	0.695831	-0.184713	0.970291	-1.4044	0.0304443	-0.459615	0.72063
ENSDARG00000008034	skib	0.0402299	0.987084	0.0765491	0.97186	-1.16887	0.11914	-0.850847	0.251593	-0.911504	0.285013
ENSDARG00000008049	si:dkey-42i9.4	0.944643	0.545369	-0.409949	0.909698	-1.84878	0.408633	-0.0786609	0.978362	-0.59751	0.89869
ENSDARG00000008060	scara3	7.4449	0.00591178	1.78871	0.684525	-4.44238	0.40222	-0.706198	0.885867	-1.68318	0.785304
ENSDARG00000008068	tma16	-1.95245	0.0808814	1.33713	0.436962	0.766712	0.855585	-0.0469589	0.985319	0.280674	0.95478
ENSDARG00000008075	illr4	0.784763	0.873063	-6.79515	0.0872731	-0.442575	0.975534	-2.37475	#N/A	-9.41783	0.0203942
ENSDARG00000008097	srsf9	0.188658	0.784829	-1.55068	0.000510089	-0.768011	0.301949	-0.444852	0.546599	-1.55357	0.0056997
ENSDARG00000008098	ifit9	-0.0199383	#N/A	-0.668713	#N/A	-7.34903	#N/A	-0.599086	#N/A	-5.83271	#N/A
ENSDARG00000008100	slc7a10a	2.02092	0.305383	1.20669	0.73456	-1.93235	0.633744	-0.532693	0.886094	-2.10047	0.53429
ENSDARG00000008105	mettl2a	-1.4474	0.167367	0.709715	0.73361	-0.418482	0.956221	-0.594599	0.75519	-0.266198	0.951574
ENSDARG00000008107	src	-0.699307	0.519856	0.0439193	0.986346	0.0514889	0.989196	-1.18062	0.372531	-0.864233	0.66416
ENSDARG00000008119	si:ch211-195d17.2	0.0850969	0.972721	0.439818	0.824287	-0.0324085	0.992022	1.15837	0.350807	0.074966	0.985394
ENSDARG00000008127	pcdh15b	-3.11454	0.0164939	3.54042	0.0188391	2.11745	0.397331	-2.44161	0.206772	-0.599081	0.909239
ENSDARG00000008131	sox1b	-0.513663	0.891513	0.642875	0.91491	-2.49823	0.552858	-3.09467	0.294465	-1.68205	0.743896
ENSDARG00000008133	foxl1	6.54798	0.0219261	0.556482	0.946177	-4.44239	0.417974	-1.33182	0.767741	-3.87263	0.325426
ENSDARG00000008140	kcnab1a	2.79984	0.578646	-1.29939	0.908344	-3.58915	#N/A	-0.275655	#N/A	-1.52751	0.921373
ENSDARG00000008141	rbl1	-1.74527	0.000200807	0.0369055	0.980163	0.232467	0.950993	0.170197	0.884528	-0.208027	0.923888
ENSDARG00000008142	stxbp3	0.0602227	0.96396	0.201689	0.877993	0.534102	0.632521	1.14763	0.0671818	1.0784	0.134847
ENSDARG00000008153	serinc5	0.0209774	0.999251	-1.37376	0.0403876	-0.395512	0.861858	0.307376	0.789848	-1.24305	0.163372
ENSDARG00000008155	sms	-1.97869	0.000303032	1.14067	0.143878	1.70862	0.0401371	-0.703014	0.479547	1.37949	0.138752
ENSDARG00000008164	btr33	5.99036	#N/A	-6.67901	#N/A	-3.44231	#N/A	2.96859	#N/A	-8.3352	#N/A
ENSDARG00000008165	caspa	-1.81834	0.108278	2.63601	0.0345506	3.73219	0.0466367	0.59744	0.801522	2.11105	0.248618
ENSDARG00000008170	dbnla	7.072	0.0234817	1.67578	0.782986	-3.44239	0.689473	-0.037279	#N/A	1.38117	0.888271
ENSDARG00000008174	hoxb1a	-2.15556	0.678376	-5.83711	0.322845	-2.72327	0.829327	-2.26565	#N/A	-6.83285	0.313658
ENSDARG00000008182	si:ch73-111e15.1	-0.0199383	#N/A	-0.668713	#N/A	-0.999683	#N/A	-5.04161	#N/A	-1.80521	#N/A
ENSDARG00000008184	mia3	-0.891215	0.0455781	-0.236465	0.838906	0.45733	0.69032	-0.463528	0.539646	-0.742515	0.346726
ENSDARG00000008186	syk	-2.34576	0.00052565	0.207957	0.931831	3.40757	0.000300034	-0.880215	0.472079	0.127343	0.971001
ENSDARG00000008188	sf1	-0.207726	0.690414	-0.418368	0.471938	-0.654456	0.278321	-0.537307	0.330572	-0.295892	0.76331
ENSDARG00000008191	tmeff1a	5.73795	0.274966	2.33316	0.829424	-0.999722	#N/A	-1.09119	#N/A	1.92692	0.909336
ENSDARG00000008192	pank1a	5.57429	8.2712e-17	-1.21215	0.237676	-3.13373	0.00143398	1.25907	0.254709	0.845629	0.616327
ENSDARG00000008200	ugp2b	0.912703	0.029127	-0.308405	0.734294	0.560796	0.545405	1.08047	0.054235	0.439166	0.662359
ENSDARG00000008203	pax1a	1.47262	0.756026	-7.36965	0.0942762	-3.27839	0.66399	-0.984679	#N/A	-10.4178	0.0217878
ENSDARG00000008209	myt1la	2.49552	0.0614618	1.03699	0.690875	-0.0592627	0.9917	-3.19847	0.0586219	-0.37155	0.948701
ENSDARG00000008212	kcnk13a	-0.0199383	#N/A	-0.668713	#N/A	-0.999683	#N/A	-5.36353	#N/A	-6.56965	#N/A
ENSDARG00000008218	znf410	-0.25989	0.772874	0.499664	0.647573	-0.342441	0.904049	-0.951481	0.260742	0.6451	0.618229
ENSDARG00000008219	crygm4	-0.0199383	#N/A	-0.668713	#N/A	-0.999683	#N/A	-6.04157	#N/A	-1.80521	#N/A
ENSDARG00000008224	vps35	0.184706	0.793694	-0.375077	0.658805	0.869335	0.223919	1.02108	0.0845235	0.851348	0.243065
ENSDARG00000008235	cog5	0.498554	0.79684	-0.56515	0.863125	-0.31903	0.970291	-0.240445	0.930272	-0.184767	0.973516
ENSDARG00000008237	sars	-0.556517	0.216191	0.292706	0.739642	-0.449486	0.647261	-0.0634222	0.94734	0.0215555	0.991248
ENSDARG00000008238	manba	-0.320202	0.850977	-0.405722	0.882818	2.55638	0.0731388	1.86823	0.184889	0.950614	0.691842
ENSDARG00000008239	mocs3	2.26979	0.397155	-1.92194	0.651358	-1.39439	0.891384	1.11761	#N/A	-1.27305	0.871561
ENSDARG00000008243	cct8	-0.606078	0.167593	0.440294	0.520341	-0.0506498	0.979679	-0.0807608	0.931415	0.42424	0.65474
ENSDARG00000008247	vezf1a	-0.0475636	0.986972	-1.30792	0.0694073	-2.5137	0.000364417	-2.16209	0.0018421	-2.58673	0.000291574
ENSDARG00000008249	ptchd4	7.3787	0.0118377	-0.0344437	0.996174	-7.02733	0.0942274	-2.45046	0.55598	-0.462918	0.966799
ENSDARG00000008255	cnot6a	-0.483566	0.233081	0.274693	0.718548	-0.64784	0.294135	-1.03957	0.024425	-0.206731	0.873718
ENSDARG00000008263	mfsd4ab	5.99654	0.0787031	-6.6852	0.109918	-0.999726	0.970291	5.41736	#N/A	-5.83288	0.290163
ENSDARG00000008275	klhl24b	0.765787	0.316936	0.480083	0.730884	1.10093	0.394036	0.0502329	0.97472	-1.16043	0.297241
ENSDARG00000008278	rcor2	-0.921869	0.301427	-0.482283	0.793842	-0.774069	0.703313	-1.2678	0.269904	-0.798136	0.66045
ENSDARG00000008279	map2k7	1.33178	0.105808	-1.22931	0.262187	-1.32143	0.345119	-0.101109	0.956914	0.319026	0.92459
ENSDARG00000008287	fam114a1	0.25848	0.839189	-0.896734	0.448954	0.607085	0.809525	0.656301	0.623138	-1.16316	0.396623
ENSDARG00000008292	eif2s3	-0.579719	0.0774908	0.267741	0.670439	0.388892	0.589808	0.108053	0.879805	0.645175	0.213361
ENSDARG00000008305	hand2	0.470706	0.80111	-1.25332	0.516921	2.89102	0.0845373	2.08184	0.212526	-0.0488892	0.993775
ENSDARG00000008306	rdh5	-0.0199383	#N/A	7.20498	#N/A	-5.44221	#N/A	-4.04165	#N/A	6.06848	#N/A
ENSDARG00000008310	ip6k2a	-0.50358	0.377351	1.27424	0.0170724	0.967458	0.209894	-0.745974	0.301751	1.18614	0.0912354
ENSDARG00000008322	ambra1a	-0.842638	0.221993	0.310445	0.85243	0.412	0.877208	-0.546657	0.622324	-0.266821	0.914868
ENSDARG00000008329	asic1a	3.75821	0.279977	-0.0781944	0.993717	-3.44999	0.622622	-2.17811	#N/A	-1.76132	0.846549
ENSDARG00000008333	znfl2a	-6.56145	0.0054111	-2.16752	0.654876	2.9079	0.612255	-1.89081	0.684068	-1.55138	0.855943
ENSDARG00000008363	mcl1b	2.54972	1.90803e-11	1.0292	0.0492558	0.757204	0.362208	2.00116	8.14471e-05	2.83503	1.10007e-08
ENSDARG00000008370	csnk1da	0.400604	0.258667	-0.232723	0.725889	-0.51564	0.360421	-0.212214	0.723574	-0.279353	0.729419
ENSDARG00000008372	spred2b	1.08009	0.00471564	-1.01996	0.0274425	-0.582264	0.474308	0.403066	0.561773	-0.852369	0.18411
ENSDARG00000008377	epn2	-1.15197	0.000165312	-0.523298	0.273698	0.498287	0.450505	-0.260253	0.681001	-1.38663	0.000898481
ENSDARG00000008380	brd7	0.136865	0.884947	0.184605	0.903134	-1.08493	0.163658	-1.06819	0.124086	-0.333259	0.834955
ENSDARG00000008383	arpc1a	1.87027	3.11629e-06	-1.45989	0.0023634	0.147787	0.970291	1.76741	0.00100412	0.342789	0.796929
ENSDARG00000008384	hdac6	-0.0633662	0.96396	0.369138	0.720207	-0.368526	0.835217	0.274965	0.781466	0.334938	0.827613
ENSDARG00000008388	mmp14b	-0.371723	0.485864	0.310094	0.731679	0.570902	0.516692	-0.113771	0.905828	-0.660957	0.393473
ENSDARG00000008395	snupn	-0.408604	0.736026	-0.737855	0.624122	-0.149138	0.9731	-0.186517	0.920715	-1.07478	0.508814
ENSDARG00000008396	ftr24	-0.119998	0.959707	-0.679954	0.70464	-0.177874	0.970944	0.0494322	0.982243	-1.49843	0.320492
ENSDARG00000008398	cacna1c	0.236369	0.906412	-0.788513	0.70838	2.85629	0.0448587	1.07099	0.534465	-0.0261404	0.996509
ENSDARG00000008403	phospho1	3.00917	0.220265	-0.919084	0.882332	0.297604	0.979144	-0.147126	0.977769	-1.07495	0.900321
ENSDARG00000008407	tspan7b	-1.6931	0.0914307	0.197072	0.960041	1.45971	0.434115	-1.53386	0.29323	-0.503383	0.891579
ENSDARG00000008413	atp11a	4.47558	1.71817e-38	-2.0501	3.2771e-07	-0.291329	0.86788	4.38559	3.51014e-24	2.37193	1.20369e-06
ENSDARG00000008414	exoc3l2a	-3.15896	0.0844357	2.03478	0.484309	1.45993	0.799392	-2.39095	0.396522	-0.659134	0.929333
ENSDARG00000008433	unc45b	0.593312	0.645954	-1.33781	0.318328	-1.34066	0.458218	2.61494	0.0302652	-0.295926	0.941543
ENSDARG00000008434	bcl2l1	-0.297702	0.739788	0.648909	0.510092	0.759679	0.556683	-0.839402	0.362869	1.05694	0.302737
ENSDARG00000008439	atxn10	-1.82964	0.454209	1.43887	0.734294	-0.0752925	0.99235	-1.91119	#N/A	1.64735	0.759859
ENSDARG00000008447	fkbp4	0.454228	0.449452	0.0395035	0.97834	-1.32894	0.0480064	0.1211	0.913666	2.38059e-05	0.999996
ENSDARG00000008450	pcolce2a	-1.16005	0.815634	3.9117	0.39447	1.78874	0.909892	-1.95065	#N/A	1.33617	0.910875
ENSDARG00000008454	cpeb1b	2.26721	0.768108	-1.49899	0.922727	4.43763	#N/A	7.12539	#N/A	5.08897	0.695949
ENSDARG00000008457	faah2a	-0.67125	0.89318	3.01858	0.472861	6.43797	0.238244	0.574679	0.925174	1.05584	0.921564
ENSDARG00000008461	anapc5	-1.62147	0.0718961	-0.23879	0.935256	0.583065	0.877271	0.406811	0.828683	-1.34432	0.413335
ENSDARG00000008472	apex2	-0.951915	0.48665	0.673053	0.794278	0.535515	0.939178	-0.821817	0.68474	-0.667581	0.852924
ENSDARG00000008473	asb14a	-0.0199383	#N/A	-0.668713	#N/A	-0.999683	#N/A	-0.599086	#N/A	-1.80521	#N/A
ENSDARG00000008480	trmt61a	-1.89963	0.0932359	0.272355	0.944814	0.561172	0.931683	-0.0863044	0.973738	0.776372	0.822219
ENSDARG00000008485	lrp3	0.0195806	0.999251	-0.49461	0.790792	0.304342	0.970291	-1.38033	0.226811	-0.0418111	0.991248
ENSDARG00000008487	dmd	0.106311	0.974423	1.93062	0.13186	-0.835656	0.79526	-0.528238	0.795355	0.506322	0.896378
ENSDARG00000008490	ltv1	-0.843737	0.0780672	0.997744	0.0803908	1.02089	0.157698	0.798469	0.252007	0.989913	0.179966
ENSDARG00000008491	si:ch211-107o10.3	7.75128	4.75877e-05	1.73534	0.24915	-6.24974	0.0127537	0.270019	0.917014	3.34239	0.0541461
ENSDARG00000008494	myl6	0.526028	0.580329	0.263275	0.902779	0.314391	0.955259	1.42075	0.164399	0.674223	0.703706
ENSDARG00000008502	pno1	-0.453712	0.503457	0.529024	0.574918	-0.10017	0.973056	1.00825	0.190206	0.647915	0.569889
ENSDARG00000008503	glcci1a	-4.12457	0.0120261	0.289978	0.968781	1.92676	0.633048	-1.19597	0.713941	-0.819397	0.903484
ENSDARG00000008540	sox21b	3.16098	0.115511	-0.389816	0.956951	-5.72474	0.0232126	-1.93398	0.538125	-1.83599	0.678846
ENSDARG00000008541	chia.4	1.45397	#N/A	-6.09415	#N/A	2.95184	#N/A	4.82635	#N/A	-1.80521	#N/A
ENSDARG00000008542	yod1	-0.349012	0.568747	-0.702142	0.286058	-0.505395	0.655034	-1.04097	0.095748	-0.806241	0.319437
ENSDARG00000008548	arhgap12a	-0.447879	0.719137	1.43039	0.202094	-0.0604369	0.987751	-0.231354	0.903883	0.39857	0.9037
ENSDARG00000008551	pole3	-1.00067	0.284257	0.114117	0.972815	-0.045884	0.989421	-1.14538	0.371127	-0.127325	0.973451
ENSDARG00000008553	zgc:136872	4.23954	#N/A	-4.9282	#N/A	-0.999764	#N/A	-0.782261	#N/A	-7.24786	#N/A
ENSDARG00000008560	brap	-0.749274	0.396872	0.324834	0.874908	0.71272	0.723773	0.576644	0.674243	0.849471	0.602304
ENSDARG00000008568	slc25a24	2.04821	3.33731e-05	0.0993467	0.966485	-0.0836671	0.976224	2.38509	0.000248499	1.24074	0.145722
ENSDARG00000008573	fam20b	0.946546	0.318325	0.395318	0.856583	-0.124671	0.975791	0.543182	0.729632	2.88458	0.00964783
ENSDARG00000008575	lyst	2.67283	9.73315e-21	-0.996059	0.00779732	-0.330816	0.729747	2.36233	1.02549e-10	2.22021	8.14347e-09
ENSDARG00000008592	mtmr8	-2.08045	0.194298	-0.200542	0.973156	1.23172	0.791362	-0.299852	0.928921	-0.781488	0.886261
ENSDARG00000008593	nbas	-0.419117	0.627944	-0.584888	0.615332	0.824241	0.537521	-0.339382	0.787899	-0.775812	0.559297
ENSDARG00000008623	cops3	-0.167171	0.894968	-0.530712	0.69006	0.674328	0.697555	-0.0133966	0.992613	-0.185879	0.949836
ENSDARG00000008637	mttp	6.18796	0.00175161	5.88538	4.44214e-09	-8.34927	0.000135047	-1.92133	0.228515	2.22868	0.168201
ENSDARG00000008639	kifap3a	-0.0118535	0.999251	-0.133116	0.923172	0.152705	0.970291	-0.605135	0.38623	-0.209086	0.90589
ENSDARG00000008660	coro1b	2.46983	0.00173835	0.373232	0.873897	-2.12669	0.0838047	-1.94597	0.0823273	-0.903016	0.634766
ENSDARG00000008662	fign	-1.55778	0.240927	0.661618	0.827381	-0.869505	0.837698	-1.72962	0.345285	-1.63899	0.474559
ENSDARG00000008674	chrnb2a	4.24515	0.434186	0.624613	0.971471	-4.44235	#N/A	3.666	#N/A	-0.689459	0.970842
ENSDARG00000008678	snx3	-0.697347	0.359662	-0.485822	0.719774	2.12031	0.012447	2.0054	0.0138029	0.911759	0.473082
ENSDARG00000008697	epas1a	2.59247	0.178286	-0.534767	0.92292	-2.35594	0.524953	0.3601	0.928921	-0.976996	0.879175
ENSDARG00000008703	apeh	0.2715	0.701733	-0.276057	0.822417	0.243092	0.938068	1.29665	0.0447104	1.24583	0.0934744
ENSDARG00000008706	paip2b	0.2549	0.66474	0.192852	0.8654	-0.700943	0.336712	0.094586	0.922279	0.596912	0.457247
ENSDARG00000008720	lmo3	4.58913	0.000579725	-0.458317	0.91491	-4.36933	0.0237269	-1.69463	0.459377	-0.88692	0.847265
ENSDARG00000008723	prkcba	-0.17821	0.931443	1.437	0.273204	-0.906062	0.720889	-1.22443	0.411862	-0.188177	0.964732
ENSDARG00000008727	ranbp3a	-1.36983	0.0126046	-0.0905636	0.970927	1.21063	0.177207	-0.466236	0.65699	-0.139376	0.957292
ENSDARG00000008732	zgc:66479	0.373372	0.729724	1.32152	0.15457	-0.688907	0.730343	-1.08464	0.321446	-0.992936	0.47305
ENSDARG00000008735	atp6ap2	1.11897	0.0639508	-0.680665	0.480857	0.84344	0.487644	1.37356	0.0867557	1.33479	0.150312
ENSDARG00000008740	esf1	-1.46467	0.0508915	-0.307221	0.886384	0.808764	0.660827	-0.143936	0.934398	0.395325	0.89426
ENSDARG00000008748	ube2na	0.516341	0.208784	-0.130939	0.907279	0.210463	0.915595	1.20612	0.0089477	1.04737	0.046021
ENSDARG00000008757	entpd6	0.00748331	0.999251	-0.397816	0.821215	-0.107836	0.975534	0.681838	0.572504	-0.0366006	0.991248
ENSDARG00000008765	tmed5	1.05112	0.0797235	0.386182	0.768704	-0.623233	0.673527	0.198941	0.87801	0.588258	0.672572
ENSDARG00000008767	tle2b	0.170449	0.912902	-0.968942	0.417806	0.134055	0.974911	-1.09618	0.35935	-2.13118	0.0474284
ENSDARG00000008772	cacng1a	6.01811	0.113083	1.60388	0.845831	-8.02731	0.118471	-1.396	#N/A	-0.522196	0.971001
ENSDARG00000008784	prpf4ba	-0.326624	0.726311	-0.29464	0.862735	-0.397756	0.886638	-1.01407	0.275286	-0.479578	0.787488
ENSDARG00000008785	dldh	0.700927	0.0519944	0.0630341	0.967964	0.152275	0.960902	0.827214	0.0877091	0.820164	0.136425
ENSDARG00000008788	camk1gb	-0.691011	0.865909	1.44864	0.782414	-0.351266	0.975534	-2.20668	#N/A	-3.61739	0.358807
ENSDARG00000008790	actr3b	5.40841	0.3281	-6.09707	0.40314	-0.999737	#N/A	4.82922	#N/A	-5.83287	0.551036
ENSDARG00000008796	her5	-0.0199383	#N/A	-0.668713	#N/A	-6.44217	#N/A	-0.599086	#N/A	-1.80521	#N/A
ENSDARG00000008803	marcksb	0.550024	0.167167	-0.292251	0.698149	-2.00126	2.34545e-06	-1.45161	0.000716847	-0.437316	0.58063
ENSDARG00000008805	orc3	-0.967353	0.410106	-0.0405246	0.98993	-0.533977	0.919257	0.480725	0.811606	-0.794087	0.762753
ENSDARG00000008807	bokb	-6.29572	0.387014	7.51333	0.430165	5.27609	#N/A	-5.04169	#N/A	0.349292	0.990398
ENSDARG00000008808	eml2	2.12133	0.0224167	0.480791	0.846883	-0.363583	0.970291	0.185676	0.932026	1.37881	0.447345
ENSDARG00000008811	cmtm3	3.17865	6.55476e-09	-1.2555	0.113577	0.402121	0.899802	4.82235	2.01925e-11	2.23586	0.00900592
ENSDARG00000008816	glud1a	1.63509	0.000173475	0.856257	0.176794	1.23639	0.0874002	2.40854	9.83656e-06	1.47165	0.0239713
ENSDARG00000008818	hsf1	-0.752744	0.436503	0.095677	0.976024	-0.408451	0.930692	-0.390456	0.810999	-0.105778	0.977953
ENSDARG00000008829	chga	6.07844	0.0338284	0.681375	0.92292	-8.02733	0.0253978	-3.28322	#N/A	-1.04736	0.905735
ENSDARG00000008832	neu1	1.15299	0.114919	-0.97861	0.339341	1.93375	0.0566925	2.45284	0.00412237	1.31665	0.27015
ENSDARG00000008835	si:dkey-46g23.5	4.82118	#N/A	-3.82876	#N/A	-5.76422	#N/A	4.24192	#N/A	-0.124256	#N/A
ENSDARG00000008840	hmbsa	-4.76539	1.47021e-11	-0.364732	0.876815	2.45562	0.0271346	0.536597	0.744459	-0.563015	0.831115
ENSDARG00000008849	ptprq	1.47213	0.753719	6.10293	0.0331724	0.409174	0.980229	-5.81322	#N/A	0.617351	0.950549
ENSDARG00000008852	elp4	-1.2561	0.442004	-0.112641	0.97834	0.433084	0.970291	-0.0718174	0.98288	-0.103763	0.988004
ENSDARG00000008858	cyp7b1	-0.361908	0.821051	1.13538	0.460519	0.227268	0.970291	-0.426805	0.835251	-0.701103	0.800695
ENSDARG00000008859	mylipa	-0.557282	0.495034	-0.419009	0.779083	0.838935	0.544042	0.152977	0.919002	1.03821	0.389836
ENSDARG00000008861	tfap2e	6.94364	3.0618e-39	-1.39398	0.0278721	-3.40452	4.63029e-06	1.1885	0.119954	2.44973	0.000624275
ENSDARG00000008866	cabp4	-0.0199383	#N/A	-0.668713	#N/A	-0.999683	#N/A	-0.599086	#N/A	-1.80521	#N/A
ENSDARG00000008867	rap1b	0.525301	0.213435	0.0164052	0.989509	0.969051	0.0809026	2.21812	1.2233e-07	0.849476	0.149241
ENSDARG00000008880	usp28	2.03282	0.00564329	-1.39464	0.170479	1.02171	0.556158	3.60632	7.61345e-05	2.36613	0.0381251
ENSDARG00000008884	hprt1	1.35159	0.0315242	-0.829817	0.393118	1.17348	0.283099	3.11135	1.81591e-05	0.782239	0.565817
ENSDARG00000008886	msx1b	1.26439	0.130037	-1.56617	0.115837	-1.12525	0.474355	2.11521	0.0423813	-0.30155	0.928525
ENSDARG00000008890	ctns	-0.649584	0.697052	0.946895	0.675261	0.822058	0.854401	0.436907	0.864642	1.96185	0.350716
ENSDARG00000008904	smarca2	1.76142	7.22013e-06	0.207907	0.863355	-0.0695578	0.975534	1.25694	0.0273487	0.658166	0.431181
ENSDARG00000008906	si:ch211-241e1.5	0.629183	0.590314	0.397153	0.867415	-0.390863	0.952819	0.819337	0.596859	1.65104	0.278535
ENSDARG00000008912	slc8a2a	4.56656	0.346354	0.857592	0.949664	-0.999718	#N/A	0.544736	#N/A	-1.94243	0.887527
ENSDARG00000008920	mrpl53	-3.57205	0.199956	-0.102847	0.990583	0.121963	0.990609	-3.57385	#N/A	3.35782	0.66144
ENSDARG00000008931	renbp	-0.0531478	0.999251	0.737446	0.763812	0.217406	0.971359	3.78121	0.0153199	2.98122	0.0767704
ENSDARG00000008936	sec11a	1.00899	0.316887	-0.465817	0.835507	0.15706	0.973996	1.25253	0.356851	0.125768	0.975844
ENSDARG00000008946	ccdc127b	-0.896399	0.66811	1.40775	0.595002	-0.102065	0.987835	-1.24088	#N/A	0.417939	0.949258
ENSDARG00000008947	rtf1	-0.784828	0.186351	-0.0449181	0.97834	-0.211328	0.969129	-0.551854	0.553303	-0.414431	0.790813
ENSDARG00000008948	pla2g3	-0.0199383	#N/A	-0.668713	#N/A	-0.999683	#N/A	-0.599086	#N/A	-7.94811	#N/A
ENSDARG00000008953	pofut1	-0.395001	0.868334	0.109048	0.97834	-0.981878	0.834016	-0.366611	0.9026	-0.403571	0.944834
ENSDARG00000008966	tbl1xr1b	0.162659	0.805748	0.0776071	0.963584	-0.60371	0.43893	-0.521368	0.423075	-0.129881	0.941541
ENSDARG00000008969	fgb	7.49815	3.76849e-05	4.13796	1.05935e-06	-0.999715	0.970291	1.89136	0.223176	1.20648	0.475712
ENSDARG00000008976	mdn1	-1.40327	0.000614356	-0.358039	0.695274	0.156608	0.970291	-0.309891	0.718582	-0.852011	0.251429
ENSDARG00000008979	golga1	0.863227	0.301976	0.418641	0.817555	0.39999	0.921273	0.461377	0.744077	0.626378	0.741717
ENSDARG00000008982	casq2	1.39562	0.210371	0.00423042	0.998576	0.951831	0.742005	2.66109	0.0452102	4.1697	0.00170123
ENSDARG00000008983	sh3glb2a	1.5141	0.277177	-0.655311	0.835327	0.687426	0.919511	1.25124	0.54899	0.26495	0.961848
ENSDARG00000008986	e2f7	-2.33267	0.181359	0.328686	0.959525	-0.265747	0.975534	-1.06497	0.7298	-0.558949	0.935107
ENSDARG00000009001	pdia6	-0.643222	0.326188	-0.0255787	0.98865	-0.168602	0.970291	-0.513515	0.604929	-0.994977	0.302101
ENSDARG00000009014	col11a1b	1.16221	0.0221425	0.293201	0.824926	-1.40041	0.0537879	-1.3749	0.0409347	-2.0438	0.0014955
ENSDARG00000009018	rhbg	9.60267	1.00913e-07	1.99226	0.0983622	-5.02734	0.0763227	-1.2709	0.412751	-1.96572	0.200591
ENSDARG00000009020	cnr1	-0.0793793	0.999251	0.509556	0.968667	0.459493	0.975534	-0.614365	#N/A	-2.34267	0.773092
ENSDARG00000009021	chrna1	2.72882	0.198781	0.694525	0.902519	-1.94897	0.704077	-0.854041	#N/A	0.0135433	0.998652
ENSDARG00000009023	ankrd28b	-1.03252	0.00949707	0.153603	0.903134	0.275555	0.877604	-0.321589	0.67984	0.224759	0.886444
ENSDARG00000009026	ank2a	0.787301	0.211929	1.01592	0.167925	-2.69349	4.97287e-05	-2.51345	7.17624e-05	-0.905357	0.366836
ENSDARG00000009031	tnikb	-1.13964	0.0240487	-0.0282379	0.985544	-0.139004	0.970291	-1.18002	0.0892699	-0.749341	0.447271
ENSDARG00000009040	si:ch73-141c7.1	1.79078	0.279595	-0.770588	0.837013	0.317087	0.970291	0.767611	0.793447	2.80536	0.29109
ENSDARG00000009046	nphp1	-0.993596	0.760024	-9.13136	0.00181442	0.212572	0.984413	-1.6452	#N/A	-9.45736	0.00383481
ENSDARG00000009074	cbr4	2.42048	0.323567	-9.19042	0.00154231	-1.88465	0.764562	2.31001	#N/A	-9.77147	0.00231556
ENSDARG00000009079		0.729397	0.891306	-0.357494	0.975012	3.10006	0.663827	8.69266	#N/A	7.79773	0.14653
ENSDARG00000009087	cd74a	4.2462	0.410136	5.97822	0.265034	-0.999697	0.970291	1.22438	#N/A	3.85784	0.668203
ENSDARG00000009094	gata2b	-0.0199384	#N/A	-0.668713	#N/A	-3.4424	#N/A	-6.3636	#N/A	-1.80534	#N/A
ENSDARG00000009106	serinc1	1.97503	0.00023643	-0.201265	0.910561	-0.655805	0.650823	0.578667	0.569575	0.699054	0.58472
ENSDARG00000009113	pigc	2.65555	0.392961	-0.32844	0.975012	5.53487	0.350954	0.102235	#N/A	0.54756	0.96261
ENSDARG00000009123	sele	-5.69592	0.00022646	3.47965	0.10324	2.84366	0.338349	-2.20141	0.423075	8.8839	0.0123709
ENSDARG00000009131	slc10a4	-4.64613	0.0613309	-7.58536	0.0313623	2.81506	0.620346	-2.83935	0.478614	-1.80524	0.895727
ENSDARG00000009133	myo1eb	-0.606745	0.621913	2.24846	0.02772	-2.21262	0.0845373	-1.74414	0.167415	-0.809527	0.716428
ENSDARG00000009134	hlx1	-2.68973	0.00525209	2.068	0.105801	1.85078	0.288154	-1.58398	0.30756	-0.51127	0.895952
ENSDARG00000009136	tp53bp2a	0.114749	0.883318	-0.173907	0.883834	-0.361958	0.781074	0.582768	0.379329	-0.290069	0.823275
ENSDARG00000009142	ppp1r13bb	-0.0533186	0.963634	0.198226	0.858582	-0.430005	0.681104	-0.136352	0.882258	0.246209	0.86294
ENSDARG00000009153	pla2g1b	-0.0199383	#N/A	0.693247	#N/A	-0.999683	#N/A	-0.599086	#N/A	-0.44325	#N/A
ENSDARG00000009160	kmo	8.81893	2.27621e-06	2.67751	0.0280314	-0.999722	0.970291	0.511706	0.821243	3.76726	0.00895866
ENSDARG00000009161	ftr55	-0.0199383	#N/A	7.06063	#N/A	-0.999683	#N/A	-0.599086	#N/A	5.92413	#N/A
ENSDARG00000009169	mob1ba	1.14428	0.0958081	0.208804	0.918296	-0.693699	0.681705	0.529135	0.663381	1.41087	0.182906
ENSDARG00000009170	ctr9	-0.67888	0.167658	0.408135	0.636489	-0.469091	0.687759	-0.639746	0.370857	0.0449718	0.984822
ENSDARG00000009178	zfand1	1.30156	0.732903	-0.796162	0.918987	-0.385246	0.975791	0.715378	#N/A	-1.10364	0.912927
ENSDARG00000009194	col16a1	0.642732	0.357102	-0.255179	0.877993	-1.15852	0.2258	-1.1053	0.189152	-1.94304	0.011568
ENSDARG00000009196	anxa3a	8.12056	0.0104486	1.54771	0.825999	-8.02733	0.0732081	-0.327512	#N/A	0.899577	0.939891
ENSDARG00000009208	prkcda	-3.07508	0.00135266	1.59148	0.279157	1.80743	0.314657	-0.959571	0.605912	-0.941142	0.715816
ENSDARG00000009209	slc9a6a	-0.35484	0.733109	-0.356455	0.844111	0.605677	0.776912	-0.0899993	0.956375	-0.291212	0.918101
ENSDARG00000009212	ppiaa	1.41014	0.000181934	-0.169347	0.888276	-0.624806	0.433918	1.36947	0.00747778	0.943688	0.13742
ENSDARG00000009214	mfsd13a	0.456026	0.539207	-0.741629	0.397069	0.564387	0.718644	1.27548	0.10433	-0.446776	0.783612
ENSDARG00000009215	zgc:112437	4.24016	0.585144	-0.62639	0.976535	-0.999764	#N/A	3.66094	#N/A	-4.46897	0.767022
ENSDARG00000009217	tom1l2	-0.749096	0.270847	-0.328052	0.831438	-0.123868	0.970598	-0.892984	0.331441	-1.37404	0.130024
ENSDARG00000009218	mars2	-1.64602	0.364246	-0.161242	0.977183	-0.012946	0.998283	-0.598594	0.858889	-1.62589	0.643619
ENSDARG00000009242	fev	-1.886	0.458906	-6.75032	0.033781	0.183355	0.985457	-1.13009	#N/A	-7.56985	0.0293896
ENSDARG00000009250	etfb	1.57701	0.00143809	0.150499	0.930629	-0.630196	0.611973	1.78101	0.00702585	1.02287	0.248618
ENSDARG00000009252	napepld	0.766579	0.501522	0.571998	0.782327	1.92807	0.222923	4.49371	0.000475646	1.49265	0.360069
ENSDARG00000009253	rtraf	0.222875	0.847269	-0.113518	0.968727	-0.158358	0.970291	0.397252	0.761964	0.0696489	0.983227
ENSDARG00000009262	si:dkey-97m3.1	-1.84046	0.109116	1.2953	0.461906	2.82172	0.115696	-2.53229	0.082581	-1.29974	0.572259
ENSDARG00000009266	uevld	0.487638	0.770549	0.0468836	0.989072	2.78258	0.0995467	2.10581	0.174591	2.20022	0.219342
ENSDARG00000009267	zgc:136439	-0.517501	0.820529	1.60748	0.464898	-0.201332	0.976246	-0.0252624	#N/A	4.04478	0.0819458
ENSDARG00000009273	ppm1da	-0.0726662	0.966621	-0.260999	0.876279	-1.07239	0.287311	-1.02562	0.23894	-0.0109018	0.997875
ENSDARG00000009280	smyd1a	8.80537	6.1235e-06	1.2272	0.570405	-5.44238	0.0618492	0.0831088	0.977769	2.15138	0.327396
ENSDARG00000009281	dnm1b	2.19183	0.106938	1.46544	0.478085	-2.847	0.14956	-3.25135	0.0496235	-0.0664804	0.991248
ENSDARG00000009285	rpl15	0.185231	0.74914	-0.346813	0.624762	-0.149518	0.967781	0.780968	0.13893	0.127109	0.937578
ENSDARG00000009299	dusp8a	1.77551	0.00224903	-1.16182	0.150345	-0.903979	0.46283	0.466027	0.68972	-0.643235	0.66045
ENSDARG00000009311	pvalb6	7.57371	0.000687462	1.3431	0.670103	-5.02734	0.166691	-1.67693	0.536805	-0.197025	0.979656
ENSDARG00000009313	zgc:63831	0.868458	0.112273	-0.698167	0.374268	2.4262	0.000238532	4.69383	5.31151e-15	3.79081	7.10913e-09
ENSDARG00000009315	clgn	-2.6056	3.20045e-27	0.458886	0.266623	1.72639	2.75002e-07	-1.20897	0.000392787	0.54483	0.28545
ENSDARG00000009336	aif1l	0.166672	0.891512	-0.277534	0.877728	-0.890982	0.490833	-0.792304	0.445007	-0.785826	0.562742
ENSDARG00000009341	nrap	10.3537	1.24454e-08	0.092384	0.97834	-7.14282	0.00200296	1.7773	0.252715	1.63891	0.399321
ENSDARG00000009342	txndc5	-0.855298	0.0779932	0.478526	0.564079	0.322761	0.866101	-0.0419372	0.969461	-0.0360072	0.988123
ENSDARG00000009346	caprin1a	-0.662451	0.101933	-0.146136	0.900482	-0.709043	0.275993	-0.855677	0.106061	-0.0511241	0.978579
ENSDARG00000009350	atg3	0.703533	0.418119	-1.28997	0.168527	1.17367	0.367207	1.89194	0.0423813	1.02351	0.46713
ENSDARG00000009351	fgf6a	-6.40422	0.100471	8.26577	0.0671339	5.38459	0.492667	-5.36368	#N/A	3.10162	0.712002
ENSDARG00000009372	diras1b	7.01655	0.277553	-7.70521	0.364571	-0.99979	0.975504	-1.88785	#N/A	-1.80533	0.94537
ENSDARG00000009386	si:ch211-222n4.6	1.86926	0.68916	1.70532	0.827829	2.18335	0.911138	-3.6699	#N/A	-1.80157	0.86283
ENSDARG00000009387	robo4	-1.94851	0.00945793	-0.492689	0.792327	-1.35034	0.318336	-2.19347	0.0290582	-0.895405	0.608746
ENSDARG00000009390	npl	-1.27932	0.052066	1.70896	0.0204487	2.24356	0.0109064	1.14152	0.253829	2.88563	0.000572758
ENSDARG00000009401	vcanb	-1.61815	0.000591934	1.21451	0.0451071	-0.162879	0.970291	-1.69208	0.0074129	-2.29936	0.000181793
ENSDARG00000009402	si:ch211-210b2.2	-2.45443	0.330522	1.01428	0.864337	0.999704	0.946633	0.0299578	#N/A	-0.121226	0.991125
ENSDARG00000009418	mef2cb	-1.11996	0.000439004	-0.310762	0.642218	1.8756	8.2515e-06	0.168155	0.819793	-0.368097	0.659365
ENSDARG00000009430	tmem30c	2.43369	0.432726	2.0442	0.675469	0.431966	0.975534	-0.106098	#N/A	0.985631	0.923508
ENSDARG00000009436	ubxn7	-0.900539	0.161446	-0.967402	0.242346	-0.0710279	0.980805	-0.85809	0.357673	-1.58127	0.0656312
ENSDARG00000009438	myog	7.00104	0.0719623	-0.381592	0.976445	-8.76428	0.101433	-0.108235	#N/A	-2.58364	0.783904
ENSDARG00000009443	zgc:92137	-4.45792	#N/A	2.65721	#N/A	3.4383	#N/A	-0.599086	#N/A	1.52071	#N/A
ENSDARG00000009447	atp5mc3b	0.601324	0.317093	-0.355877	0.757913	0.313993	0.90011	1.13586	0.109732	0.247972	0.903484
ENSDARG00000009459	slc35e4	1.94989	0.51153	-1.28583	0.826637	-2.82497	0.584748	-0.14641	#N/A	-2.93491	0.530614
ENSDARG00000009466	rgs9bp	-0.0199383	#N/A	-0.668713	#N/A	-0.999683	#N/A	-0.599086	#N/A	-7.70711	#N/A
ENSDARG00000009470	hnf1a	-8.45548	0.000733522	9.43802	0.000793691	7.43582	0.0761106	-7.50119	#N/A	2.6889	0.52501
ENSDARG00000009471	nid2b	-0.0199383	#N/A	-0.668713	#N/A	-0.999683	#N/A	-0.599086	#N/A	-1.80521	#N/A
ENSDARG00000009472	med19b	-0.751466	0.620399	0.426679	0.896287	0.658764	0.906589	0.0615698	0.982521	0.256624	0.960949
ENSDARG00000009473	ppardb	0.181856	0.861507	0.504776	0.650656	-0.142728	0.970291	-0.508454	0.625461	0.268034	0.90833
ENSDARG00000009477	prkar2ab	2.22762	0.450566	-7.85202	0.0182675	-1.82855	0.827961	-2.0082	#N/A	-9.45736	0.00805479
ENSDARG00000009480	pdcl	1.48569	0.0016779	-0.197192	0.89503	-0.983819	0.242139	-0.325504	0.740665	-0.24219	0.904157
ENSDARG00000009482	slc38a8a	-0.0199383	#N/A	-0.668713	#N/A	-6.24953	#N/A	-0.599086	#N/A	-1.80521	#N/A
ENSDARG00000009484	arf1	0.0602722	0.922526	-0.47598	0.239713	-0.024983	0.985938	0.607013	0.140631	0.0513	0.970282
ENSDARG00000009488	gipc2	9.09653	2.8369e-06	1.23016	0.571199	-8.39657	0.000357524	0.61528	0.811123	-0.0399185	0.995845
ENSDARG00000009493	si:ch211-45c16.2	3.29415	3.35227e-05	-0.533611	0.797619	-3.75889	0.000436564	-2.21281	0.0503207	-1.61566	0.264499
ENSDARG00000009494	xrcc1	-1.0521	0.017391	0.0427098	0.978057	-0.723345	0.385302	-0.0947068	0.928921	-0.519326	0.610164
ENSDARG00000009499	syne1a	0.183959	0.741728	-0.0383797	0.977183	0.0378433	0.984354	-1.35625	0.00179023	-0.855999	0.120994
ENSDARG00000009505	prelid3b	0.525055	0.145455	-0.345923	0.554817	1.85858	2.67455e-06	1.88018	3.94634e-07	2.54572	8.84804e-12
ENSDARG00000009511	tnfa	-0.0199383	#N/A	-0.668713	#N/A	-0.999683	#N/A	-0.599086	#N/A	-1.80521	#N/A
ENSDARG00000009524	rnf150b	-0.256309	0.846051	0.391588	0.843563	-0.266027	0.970291	-0.782605	0.54415	-0.948914	0.547781
ENSDARG00000009525	tial1	1.42406	0.0326348	-0.149624	0.953253	-0.723927	0.66487	0.00319292	0.998918	0.148899	0.961269
ENSDARG00000009534	wls	-0.0750395	0.967678	0.162381	0.940782	-1.2907	0.192853	0.0805708	0.957066	-0.536928	0.745723
ENSDARG00000009544	cldnb	9.33115	3.72018e-06	1.30386	0.60006	-8.93423	0.000260101	-0.229827	0.942517	0.616331	0.910423
ENSDARG00000009549	ubr4	0.341479	0.468944	-1.0651	0.0102097	0.0209587	0.989463	0.241794	0.741064	-0.409701	0.631609
ENSDARG00000009550	foxi3b	0.785913	0.834396	2.10727	0.596114	-3.09578	0.481732	-2.55674	0.477049	-1.44147	0.834806
ENSDARG00000009553	gng3	9.26103	7.4336e-07	1.03204	0.608267	-8.30035	0.000219845	-2.36441	0.115413	-0.277402	0.955629
ENSDARG00000009557	wrap73	-0.958898	0.764085	0.609662	0.925408	-1.18564	0.91085	-1.24945	0.755738	0.144702	0.989119
ENSDARG00000009567	spegb	3.52161	1.2138e-10	0.229881	0.900482	-2.3716	0.00321532	-1.47962	0.0675664	-0.174199	0.949258
ENSDARG00000009568	ca10b	0.343163	0.981045	2.55704	0.752621	0.624635	0.975534	-2.36651	#N/A	0.0860551	0.996907
ENSDARG00000009585	papola	0.379503	0.580329	-0.412335	0.693724	-0.210742	0.964802	-0.0639547	0.95818	-0.315497	0.855707
ENSDARG00000009594	nr1d2b	1.0943	0.0028665	0.258811	0.773317	0.693445	0.312548	1.09586	0.0301952	0.47084	0.57499
ENSDARG00000009607	ccnc	-0.0610229	0.974208	-0.505064	0.644811	-0.106043	0.973378	0.30934	0.791378	-1.04747	0.283053
ENSDARG00000009610	rgs12a	0.097995	0.930085	-0.664745	0.393427	-0.0269849	0.989778	0.0657024	0.956918	0.227019	0.912168
ENSDARG00000009624		0.181374	0.999251	0.338201	0.983197	5.0089	#N/A	5.61082	#N/A	5.4116	0.723137
ENSDARG00000009626	nrbp2b	-2.16003	0.568798	-5.11148	0.289228	-0.666875	0.970291	-4.24284	#N/A	-9.49583	0.027103
ENSDARG00000009629	unc119.1	-1.36219	0.0339887	0.517186	0.695662	-0.710482	0.65037	-1.45473	0.0972135	-0.681792	0.649703
ENSDARG00000009637	rcvrn3	7.07306	0.000702262	4.84263	0.000437587	-0.999723	0.970291	-0.118688	0.970229	-1.87598	0.463459
ENSDARG00000009640	psmb1	0.99601	0.0112214	-0.610638	0.295244	-0.552918	0.515874	0.754787	0.201888	0.566505	0.487282
ENSDARG00000009653	lhfpl2a	0.0375175	0.999251	-0.577175	0.821563	-0.154033	0.975791	-0.257841	0.911626	-0.477148	0.905316
ENSDARG00000009657	fgfr1op2	-0.612294	0.676819	0.881987	0.653667	0.347026	0.970291	0.259307	0.912705	0.902384	0.735635
ENSDARG00000009673	si:ch211-197g15.6	3.82312	#N/A	-4.51177	#N/A	-0.999831	#N/A	-1.19868	#N/A	-1.80536	#N/A
ENSDARG00000009677	dlg1	2.08726	3.29515e-08	-0.560015	0.400741	-1.0935	0.085112	1.46702	0.00602116	0.31041	0.813327
ENSDARG00000009681	med27	0.615281	0.556663	-1.07722	0.367684	-0.14207	0.974198	0.593369	0.692453	-0.408944	0.895881
ENSDARG00000009685	ppa2	0.76696	0.591674	0.56608	0.836748	-0.72069	0.871246	-0.337452	0.887127	-0.460809	0.912989
ENSDARG00000009689	daam1b	-0.319965	0.714798	-0.682852	0.477951	-0.221127	0.970291	-0.534063	0.609805	-0.465347	0.779538
ENSDARG00000009693	llgl1	0.524894	0.487409	-0.269609	0.871545	-1.12348	0.256012	0.240129	0.854154	-0.261322	0.912989
ENSDARG00000009702	ascl1b	7.45364	0.0114423	-1.47033	0.8099	-3.44239	0.670149	6.87447	#N/A	-1.57593	0.845701
ENSDARG00000009724	rpn2	-0.494514	0.149701	-0.17943	0.826895	0.265054	0.799392	-0.1657	0.801229	-0.666573	0.190183
ENSDARG00000009727	twf2b	9.1387	6.17716e-06	-0.852884	0.794562	-5.02734	0.128742	1.79495	#N/A	1.1416	0.772979
ENSDARG00000009733	kif21b	-0.38931	0.648179	-0.332585	0.831739	0.307792	0.933979	-0.755109	0.444688	0.57864	0.700928
ENSDARG00000009735	gigyf2	-0.23202	0.737836	-0.483825	0.537217	0.0036178	0.998283	-0.30781	0.726427	0.0121941	0.996411
ENSDARG00000009738	cacnb4a	1.23905	0.328444	-0.927146	0.65724	1.19573	0.66964	1.3345	0.452742	0.27046	0.956667
ENSDARG00000009740	ppp1r7	0.0140398	0.999251	-0.391211	0.763637	-0.189433	0.970291	-0.0888783	0.948266	-0.277631	0.904051
ENSDARG00000009743	efhc1	-5.13859	0.156885	-3.54493	0.619933	-0.202385	0.988464	-1.16556	#N/A	-7.70734	0.159026
ENSDARG00000009745	fbxw2	-0.697252	0.675906	-0.881606	0.7189	1.14068	0.718455	-0.44183	0.863549	-1.2348	0.645591
ENSDARG00000009748	dffb	1.27587	0.418442	-0.889844	0.756444	-0.740033	0.914416	0.526701	0.851183	0.751499	0.873587
ENSDARG00000009753	sf3b6	0.944351	0.0298344	0.201748	0.867415	-0.360481	0.805362	0.303984	0.718675	0.538034	0.567122
ENSDARG00000009754	zc3h11a	-0.135288	0.872941	-0.566871	0.438811	0.0416972	0.985457	-0.264987	0.772585	-0.718376	0.401007
ENSDARG00000009764	srek1	-0.745144	0.181792	0.490618	0.597308	0.519109	0.705007	-0.917956	0.217356	0.881423	0.346047
ENSDARG00000009771	ppme1	1.46905	0.00144178	0.0859873	0.96821	-0.142385	0.970291	0.342658	0.718675	1.02642	0.200561
ENSDARG00000009779	mcl1a	0.503672	0.438393	0.672324	0.410473	2.28597	0.000500632	0.999561	0.187145	2.54399	5.54384e-05
ENSDARG00000009782	myh11a	-1.58672	0.0344861	0.600334	0.699301	3.63325	8.81238e-05	2.5248	0.00911011	-1.86905	0.0908351
ENSDARG00000009783	dirc2	1.52878	0.0112372	0.115693	0.964812	0.259754	0.966127	1.7737	0.0295907	2.05695	0.0161414
ENSDARG00000009796	klc1a	1.61997	0.00280855	-0.563676	0.585426	-0.43973	0.835278	-0.0174111	0.989008	0.364935	0.849978
ENSDARG00000009806	smfn	-1.20306	0.386451	1.37674	0.458861	0.203205	0.974509	-0.774852	0.728411	0.260003	0.961269
ENSDARG00000009822	her4.4	3.77919	1.05194e-12	-1.72445	0.0121629	-2.40034	0.0020186	-0.754487	0.456053	-0.645763	0.657941
ENSDARG00000009823	pou3f1	4.16023	0.000458456	-0.331272	0.940782	-6.05631	7.53468e-05	-2.26535	0.223242	-1.93025	0.418207
ENSDARG00000009825	mmp23bb	5.2447	6.41656e-05	-1.11548	0.650656	-3.54879	0.0893869	0.609504	0.82	-1.53645	0.576163
ENSDARG00000009830	hdlbpa	0.476542	0.0459286	-0.118467	0.852843	0.0778999	0.970291	1.31951	3.88425e-07	0.463366	0.236397
ENSDARG00000009837	agk	-0.634398	0.437923	-0.28029	0.881796	0.383972	0.912417	0.0905599	0.954017	-0.0363682	0.991248
ENSDARG00000009839	fam117bb	1.24428	0.555784	0.872408	0.831774	-2.59331	0.372712	-0.588056	0.868756	-0.468809	0.947921
ENSDARG00000009844	dusp23a	-2.21182	0.671943	2.46879	0.76424	-0.765205	0.970305	-2.34497	#N/A	-0.487612	0.977879
ENSDARG00000009851	wdr41	-0.0720703	0.988869	0.0577572	0.983148	0.600177	0.894615	-0.828947	0.625594	0.106414	0.982065
ENSDARG00000009862	dcps	-2.37323	0.00930231	1.96801	0.0975016	-0.318503	0.970291	-2.28194	0.0715638	0.451909	0.90433
ENSDARG00000009864	ddx55	-0.8144	0.611344	-2.01467	0.209969	0.270074	0.970291	0.0331958	0.98962	-2.89614	0.0980874
ENSDARG00000009868	dcaf11	1.11928	0.140203	0.130418	0.965044	0.754581	0.689066	-0.144866	0.928921	-0.142843	0.964837
ENSDARG00000009870	mapk8b	-0.264633	0.852051	-0.145293	0.966932	0.157334	0.972117	-0.578039	0.704502	-0.273257	0.937479
ENSDARG00000009871	snrpc	-0.502997	0.65468	-0.223293	0.931831	-1.14608	0.465846	-1.45503	0.206743	-0.989248	0.557484
ENSDARG00000009874	cyp2k6	-0.0199383	#N/A	-0.668713	#N/A	-0.999775	#N/A	-0.599178	#N/A	-1.8053	#N/A
ENSDARG00000009881	ier5	0.425012	0.444206	0.530053	0.461735	-0.0405086	0.985671	0.010085	0.991686	1.21958	0.0595736
ENSDARG00000009885	sult3st1	5.14272	#N/A	-5.83138	#N/A	-0.999683	#N/A	4.56358	#N/A	-5.24777	#N/A
ENSDARG00000009886	rnf114	2.19016	0.0105257	-0.742737	0.660057	-0.390098	0.961131	1.83729	0.146374	-0.120952	0.977669
ENSDARG00000009899	znf385a	0.324645	0.924375	-0.890157	0.8283	-1.85562	0.617825	-0.683	0.842238	-3.14742	0.22648
ENSDARG00000009901	slc38a5a	-1.96123	0.000624975	-0.220021	0.907899	2.66206	0.000495666	1.58217	0.0584398	0.745144	0.586049
ENSDARG00000009922	dmbx1a	2.95552	0.0900594	1.8694	0.480587	-4.37078	0.0626191	-3.19922	0.162498	-1.45341	0.724912
ENSDARG00000009930	cadm2a	7.74153	9.03264e-05	-0.0558935	0.98865	-8.30036	0.00038321	-2.4602	0.146188	-0.91801	0.796532
ENSDARG00000009939	micu2	-0.169688	0.915388	0.383807	0.854677	1.41835	0.295309	0.680026	0.629492	0.232953	0.946766
ENSDARG00000009941	erc1a	8.34236	2.30195e-05	0.782803	0.789339	-8.19726	0.000552584	-2.21084	0.217849	1.10647	0.737208
ENSDARG00000009942	cdc6	-2.28535	0.000157579	-0.136831	0.960041	-0.33862	0.933486	-0.513481	0.682399	-0.886089	0.515737
ENSDARG00000009949	fndc4b	5.50842	0.114311	2.01855	0.736013	-6.02734	0.247911	-1.90571	#N/A	1.16036	0.919698
ENSDARG00000009950	edf1	1.2361	0.0304409	0.105781	0.965044	0.782139	0.541225	1.21338	0.134062	2.57104	0.000559806
ENSDARG00000009953	med14	-0.576525	0.165799	-0.148496	0.896287	-0.66557	0.318172	-0.414155	0.523502	0.0811299	0.963679
ENSDARG00000009958	cbl	-0.863719	0.0626364	-0.471877	0.551629	0.624567	0.507277	-0.611003	0.40107	-0.466401	0.669882
ENSDARG00000009961	rundc3b	4.41588	0.361803	-5.10454	0.424713	-6.02733	#N/A	-2.41328	#N/A	-6.24791	0.387685
ENSDARG00000009978	icn	2.40113	0.135928	0.678649	0.871412	-1.18653	0.820959	-0.0493431	0.988726	-0.323164	0.961972
ENSDARG00000009982	fam199x	0.213697	0.84924	-0.233032	0.903884	-0.5527	0.782086	-0.129702	0.929421	0.272756	0.916512
ENSDARG00000010002	gna11a	0.578286	0.293776	0.127326	0.936548	-0.830875	0.31879	-0.207964	0.838222	0.0507218	0.983213
ENSDARG00000010008	vim	2.16993	0.00346467	0.512765	0.761261	-4.17224	2.9239e-06	-0.960775	0.42935	-1.8279	0.0956735
ENSDARG00000010010	trim13	0.899166	0.432362	1.93186	0.0841516	0.70177	0.861858	-0.0736669	0.973317	0.399619	0.912405
ENSDARG00000010018	qki2	1.9971	1.74532e-07	-0.9718	0.0656782	-0.00711521	0.997339	1.6685	0.00132974	-0.484226	0.623674
ENSDARG00000010021	grpel1	-0.588175	0.415101	0.338102	0.821813	0.902451	0.431476	0.448115	0.68972	0.257196	0.914571
ENSDARG00000010023		-0.556138	0.833723	1.88145	0.444187	-0.701003	0.950363	-2.47704	0.28532	-0.237993	0.973451
ENSDARG00000010029	spon1a	5.35264	0.16864	3.4585	0.499585	-5.7643	0.350054	-4.61167	#N/A	0.444548	0.975662
ENSDARG00000010031	ssh1b	0.486046	0.794093	-0.253361	0.954225	-1.33738	0.619584	-2.00489	0.231427	-0.676578	0.867085
ENSDARG00000010032	cmtm7	3.28117	1.96607e-05	-0.909748	0.534064	1.20634	0.535016	5.97845	1.21965e-08	2.64375	0.029214
ENSDARG00000010035	engase	-1.06038	0.165202	-0.384699	0.833655	1.58393	0.15313	0.551785	0.680868	-0.562992	0.779897
ENSDARG00000010042	dnm1a	1.62715	0.074762	1.67091	0.136582	-2.58793	0.0309005	-2.31863	0.0400907	0.0834547	0.985394
ENSDARG00000010047	neu3.2	-0.484587	0.914609	-8.3105	0.00774349	-0.762208	0.970291	-0.399981	#N/A	-11.2021	0.000538525
ENSDARG00000010051	ufd1l	0.228429	0.833954	0.113576	0.96769	0.578677	0.76418	0.780678	0.457507	0.641071	0.677129
ENSDARG00000010052	ndrg3b	-0.479561	0.61326	0.568174	0.684422	0.72544	0.687308	-0.0278293	0.985997	-0.0457919	0.989563
ENSDARG00000010059	itpkb	1.42797	0.0101137	-0.960834	0.223103	1.27226	0.166691	4.331	2.01925e-11	1.18323	0.211994
ENSDARG00000010070	adam9	0.734975	0.179608	-0.132997	0.93765	-0.102758	0.970944	0.808266	0.289261	0.629861	0.557708
ENSDARG00000010075		6.25321	0.316936	-6.94187	0.402167	-4.44233	#N/A	-0.85599	#N/A	-8.94825	0.331251
ENSDARG00000010078	nup133	-1.46183	0.000140895	0.829487	0.127381	0.0653596	0.975534	-0.665781	0.305378	0.493551	0.601165
ENSDARG00000010083	rbfox3a	4.67147	1.11735e-06	-1.24476	0.458101	-3.7115	0.00766097	-1.2712	0.452974	-1.20685	0.59678
ENSDARG00000010085	p4ha2	0.538678	0.52563	-0.2942	0.872181	-1.48895	0.133083	0.139855	0.926826	-1.33059	0.204224
ENSDARG00000010096	slc1a6	4.06803	0.270563	-4.75669	0.310032	-6.02734	0.216965	-4.23918	#N/A	-9.67417	0.0138539
ENSDARG00000010097	f9a	4.77896	#N/A	-5.46761	#N/A	-0.999683	#N/A	4.19981	#N/A	-1.80521	#N/A
ENSDARG00000010098	pank1b	0.657491	0.151188	-0.103197	0.946478	0.0291209	0.987991	-0.0641537	0.949552	0.387211	0.726069
ENSDARG00000010108	bri3bp	1.28981	0.0749969	-0.461026	0.772615	-0.665711	0.745991	-0.563032	0.660254	-0.663029	0.702375
ENSDARG00000010113	ndufb8	1.26299	0.00156703	-0.0629972	0.972578	0.0619285	0.977107	1.07305	0.0606443	0.641216	0.433392
ENSDARG00000010130	smpdl3b	1.51	0.803888	-3.29795	0.644474	1.06724	0.970291	8.61036	#N/A	-1.91559	0.894046
ENSDARG00000010132	dacha	0.436245	0.667989	0.283711	0.89158	-0.748745	0.679195	-0.824105	0.481775	-0.476746	0.831115
ENSDARG00000010137	ldb1a	0.486209	0.351946	-0.60755	0.359028	-0.883632	0.214379	-1.02401	0.084082	-0.974606	0.152543
ENSDARG00000010144	plppr3a	0.171606	0.847501	-0.0749333	0.972578	-1.4097	0.0453141	-2.44592	1.5656e-05	-0.902391	0.303592
ENSDARG00000010145	tor4aa	-1.54835	0.42099	0.229296	0.972815	1.00798	0.886511	-0.912582	0.769778	-0.600133	0.928383
ENSDARG00000010146	cpa2	-0.0199383	#N/A	-0.668713	#N/A	-0.999683	#N/A	-0.599086	#N/A	-1.80521	#N/A
ENSDARG00000010149	atp5fa1	0.211984	0.61901	0.316662	0.560444	-0.074501	0.970291	0.587479	0.187533	0.528133	0.333738
ENSDARG00000010154	vstm4a	-2.05439	0.0411194	1.23374	0.438919	2.50345	0.107824	-1.66954	0.26394	-1.81778	0.277671
ENSDARG00000010155	abi1a	-0.880238	0.163309	-0.0303978	0.986374	0.259546	0.952964	-0.300506	0.803437	-0.632959	0.635352
ENSDARG00000010160	rps15a	0.179468	0.861895	-0.399359	0.755874	0.382056	0.877858	1.32374	0.0906452	-0.73676	0.536667
ENSDARG00000010169	myd88	-0.233677	0.876345	0.865651	0.53687	1.29483	0.402628	0.337312	0.84988	1.39109	0.338874
ENSDARG00000010181	asap2a	-0.981507	0.153211	0.393953	0.797624	-0.330101	0.931381	-1.64639	0.0487041	-0.342283	0.885279
ENSDARG00000010183	si:ch73-265h17.1	0.382539	0.925207	-7.95107	0.00410925	1.51319	0.822929	1.2459	#N/A	-8.20784	0.00768186
ENSDARG00000010186	myo3a	10.1748	2.88005e-09	0.175841	0.951735	-9.59212	7.67026e-07	-1.13244	0.34774	-0.873963	0.612754
ENSDARG00000010192	pax3a	0.353438	0.815519	-1.05287	0.480576	-3.28351	0.00420419	-1.50065	0.26777	-2.01789	0.15128
ENSDARG00000010194	eif4bb	-1.12411	0.00111626	-0.0222197	0.983522	0.357686	0.729394	0.233021	0.750546	0.467523	0.557304
ENSDARG00000010207	smad3b	2.26505	0.0235986	0.283681	0.930652	-3.04733	0.0253978	-0.499998	0.809924	-0.00900757	0.99859
ENSDARG00000010231	ppm1na	-0.0199386	0.999251	9.63908	0.07014	-0.99975	0.970305	-6.21167	#N/A	0.889999	0.961269
ENSDARG00000010238	rbm22	-0.64767	0.446226	0.331521	0.858705	-0.154009	0.970291	-0.316758	0.826212	0.0164022	0.996907
ENSDARG00000010244	rpl22l1	0.492624	0.556664	-0.878613	0.356189	-0.360299	0.91533	1.12482	0.226254	-0.430145	0.828913
ENSDARG00000010246	prmt1	-1.40892	0.00034705	0.0579209	0.973527	-0.340361	0.8167	-0.235373	0.787136	-0.358703	0.759043
ENSDARG00000010248	wdr54	1.89812	0.565294	1.5469	0.793244	-1.65199	0.877604	0.555644	#N/A	1.11055	0.910886
ENSDARG00000010250	nqo1	1.65127	0.0113595	0.85339	0.404897	-1.93376	0.0372148	0.394975	0.766927	0.00861304	0.998474
ENSDARG00000010252	jak3	4.56521	0.0106898	2.1587	0.258623	-2.93681	0.389604	-0.272972	0.932642	4.08526	0.0768614
ENSDARG00000010255	bin2b	-1.76088	0.0228315	0.946616	0.455254	0.73715	0.741941	1.40628	0.244531	1.67107	0.19947
ENSDARG00000010266	igf2bp3	-0.168135	0.677582	-0.845508	0.00542021	-0.530024	0.255787	0.196664	0.716271	-0.773124	0.0534738
ENSDARG00000010267	dpydb	1.52873	0.279505	2.82458	0.0485756	-1.4987	0.594672	-0.384348	0.887777	2.3926	0.23143
ENSDARG00000010270	fezf1	6.12038	0.0255177	0.241711	0.976445	-9.30035	0.00386976	-3.80833	#N/A	-2.81187	0.499817
ENSDARG00000010276	ptgs2b	1.96506	0.382533	2.90807	0.234421	-3.15321	0.330483	-0.0306279	#N/A	2.92497	0.377881
ENSDARG00000010279	scamp2	0.877987	0.0363164	0.142252	0.91141	0.810949	0.254859	1.6105	0.00138548	1.77519	0.000741872
ENSDARG00000010280	clasp1a	-0.744965	0.153449	-0.620774	0.410159	0.689924	0.478597	-0.775788	0.288448	-0.860095	0.304708
ENSDARG00000010281	xpo4	-0.890887	0.117092	-0.315123	0.816111	-0.269004	0.936292	0.160497	0.897174	-0.0804612	0.975213
ENSDARG00000010294	fmodb	6.91067	0.0313004	0.516472	0.963584	-6.24973	0.209287	-1.96912	#N/A	-3.27164	0.562761
ENSDARG00000010296	kcnh6b	4.15487	0.172702	-9.59595	0.00766988	-1.68995	0.90422	8.32813	#N/A	-6.24791	0.236887
ENSDARG00000010300	traf3ip1	0.537652	0.69406	-0.466524	0.852432	-0.580125	0.897028	0.119346	0.957327	-1.22791	0.516501
ENSDARG00000010301	b4galt6	-0.79793	0.160887	-0.0526236	0.977477	0.253778	0.942234	-0.820552	0.3059	-0.0574153	0.983164
ENSDARG00000010312	cp	1.85795	0.0448052	1.85418	0.0938364	1.20166	0.65037	0.283775	0.889014	2.2526	0.0948036
ENSDARG00000010316	qars	-0.229379	0.679055	-0.202321	0.840817	0.280236	0.848551	0.440563	0.494732	0.267849	0.825628
ENSDARG00000010317	gpr183a	-0.607956	0.80727	1.47313	0.590365	3.0124	0.277697	7.58961	0.0215814	2.91271	0.275399
ENSDARG00000010318	srpx	-2.38313	0.00158942	2.75854	0.00108276	-0.448827	0.915595	-1.72758	0.125893	-1.10163	0.476512
ENSDARG00000010331	si:ch211-26b3.2	-1.78419	0.0616553	0.124049	0.973805	0.361422	0.970291	0.42405	0.833612	-1.17916	0.549177
ENSDARG00000010332	zgc:56231	-0.188331	0.965614	3.15296	0.0869711	-0.975609	0.884057	5.94719	#N/A	4.12006	0.0846497
ENSDARG00000010347	acer1	-0.0199383	#N/A	-0.668713	#N/A	-0.999683	#N/A	-0.599086	#N/A	-6.24774	#N/A
ENSDARG00000010350	c1ql3a	1.48165	0.742782	-8.91787	0.024381	0.983252	0.970291	-0.0780042	#N/A	-7.94835	0.109233
ENSDARG00000010376	slc5a3a	-0.0199383	#N/A	-0.668713	#N/A	-5.76413	#N/A	-0.599086	#N/A	-1.80521	#N/A
ENSDARG00000010381	rnf2	0.37017	0.668562	-0.25693	0.880894	-0.559387	0.751075	-0.491955	0.658095	-0.412536	0.827613
ENSDARG00000010384	lpar5a	-2.94021	0.314969	2.27121	0.633677	3.10025	0.595555	5.34517	#N/A	1.6363	0.842638
ENSDARG00000010385	sept4a	9.21823	2.3362e-06	0.871714	0.753537	-6.90181	0.00687079	-1.64908	0.408774	-0.0238978	0.997726
ENSDARG00000010400	lrrfip2	0.263681	0.822786	0.172604	0.945999	0.360527	0.933979	0.191987	0.905465	1.03177	0.453783
ENSDARG00000010407	ppp4r4	5.19011	0.299943	0.532319	0.973393	-0.999749	0.970291	-1.8317	#N/A	-0.15875	0.994241
ENSDARG00000010408	igsf9b	0.193229	0.898004	-0.374165	0.858926	-1.57107	0.205444	-2.52576	0.00808759	-1.31683	0.333738
ENSDARG00000010411	epn1	-1.59784	0.000328052	-0.252575	0.844726	1.60197	0.012447	-0.0423979	0.970001	0.636837	0.530761
ENSDARG00000010415	sirt4	2.35027	0.491559	-0.785239	0.926576	1.76946	0.897028	-0.044665	#N/A	-0.869837	0.940647
ENSDARG00000010420	ndrg1b	8.98776	0.000106434	-0.783725	0.878497	-0.999736	0.970291	-2.27245	0.437654	-1.96992	0.630709
ENSDARG00000010423	npsn	-6.71081	9.24502e-14	2.23745	0.09208	6.07761	1.21425e-06	-4.21739	0.000636909	-1.38365	0.509878
ENSDARG00000010425	scara5	-0.792008	0.746924	1.00079	0.793588	2.03071	0.58829	-1.34074	0.646312	-1.16689	0.80378
ENSDARG00000010432	eaf2	0.273821	0.836159	-0.127358	0.969849	-0.295513	0.970291	0.559325	0.704396	0.0993535	0.979019
ENSDARG00000010434	clu	6.8773	0.00241253	3.18527	0.114626	-7.44237	0.00868899	-1.72948	0.520296	-0.562771	0.933659
ENSDARG00000010437	tent5c	-3.48301	0.0872365	1.0599	0.836143	2.0481	0.68267	-2.22776	0.496096	1.44671	0.806126
ENSDARG00000010442	rnf11a	0.638871	0.594968	0.896227	0.560977	0.29486	0.970291	0.571875	0.744822	0.656494	0.801324
ENSDARG00000010445	trabd	-0.000110988	0.999945	0.0525193	0.97834	0.10309	0.974509	1.22202	0.140977	0.471967	0.772979
ENSDARG00000010454	guca1a	-3.69036	#N/A	-4.29499	#N/A	-0.537755	#N/A	3.02719	#N/A	-6.56966	#N/A
ENSDARG00000010472	atp1a2a	3.48285	0.0403217	0.931519	0.826637	-3.56413	0.178395	0.424164	0.911965	1.08128	0.84069
ENSDARG00000010477	p2rx3a	3.5659	0.65671	0.909683	0.968984	-3.44234	#N/A	0.544103	#N/A	-4.03775	0.792254
ENSDARG00000010478	hsp90aa1.1	-0.597019	0.786051	0.845634	0.797994	-1.25937	0.751075	0.714407	0.800796	-0.73878	0.884639
ENSDARG00000010481	bzw1a	-0.344335	0.553063	-0.259893	0.81306	-0.0739105	0.975504	0.282758	0.742168	0.167013	0.928525
ENSDARG00000010482	prg4a	5.71718	0.219485	0.743935	0.961993	-7.52981	0.262858	-1.62655	#N/A	-1.09812	0.948126
ENSDARG00000010487	sae1	-1.2161	0.0960425	-0.262297	0.901784	-0.441022	0.890502	-1.2174	0.237141	-0.75195	0.642411
ENSDARG00000010514	cxcr5	6.82678	0.0345808	1.74055	0.780771	-4.44238	0.502454	-0.949923	#N/A	2.20072	0.769716
ENSDARG00000010515	dvl1a	0.3419	0.861072	0.12978	0.976024	0.794705	0.852842	-0.0822522	0.975037	0.680018	0.853348
ENSDARG00000010516	rpl21	0.0522787	0.977842	-0.278496	0.839635	0.620767	0.611973	0.937635	0.224023	-0.30016	0.874316
ENSDARG00000010519	per3	0.25965	0.609623	0.466822	0.425923	0.35845	0.729404	0.526235	0.370746	0.652485	0.313658
ENSDARG00000010524	si:ch211-282j22.3	-0.0682897	0.939558	-0.174012	0.872541	0.0855583	0.970291	0.622772	0.29402	-0.0930515	0.959266
ENSDARG00000010531	scamp4	-0.18581	0.836747	-0.128768	0.945999	1.23937	0.116742	2.50355	3.38488e-05	1.17048	0.152896
ENSDARG00000010553	mmgt1	0.14153	0.886996	-0.57432	0.517146	0.301372	0.915128	0.0954369	0.938972	0.0676054	0.979019
ENSDARG00000010555	pdha1b	-0.0199385	#N/A	-0.668717	#N/A	-0.999689	#N/A	-5.849	#N/A	-8.64006	#N/A
ENSDARG00000010556	mmp25b	-1.89027	0.48665	-0.799288	0.902554	0.39358	0.973378	0.745855	0.87695	-1.10544	0.893626
ENSDARG00000010563	spoplb	0.792768	0.255989	-0.995227	0.242157	-0.34327	0.919257	1.04953	0.252105	0.0743546	0.980117
ENSDARG00000010563	spopla	0.792768	0.255989	-0.995227	0.242157	-0.34327	0.919257	1.04953	0.252105	0.0743546	0.980117
ENSDARG00000010565	aqp4	5.43359	0.107445	1.92851	0.73739	-6.24973	0.1986	-0.588232	#N/A	-1.15134	0.912752
ENSDARG00000010571	ezh2	-1.372	0.00279089	-0.532839	0.520974	0.21646	0.95354	-0.999103	0.14571	-0.91845	0.265943
ENSDARG00000010572	slc25a25a	-0.691298	0.517192	0.251343	0.923017	1.88085	0.140307	1.5612	0.195698	2.53814	0.0296214
ENSDARG00000010583	pard3ab	0.0637826	0.968364	-0.529314	0.586105	-0.712425	0.532489	-0.39108	0.702618	-1.0193	0.259043
ENSDARG00000010586	tex9	7.48773	0.125618	-0.329466	0.979053	-0.999755	0.971037	-0.392038	#N/A	-1.15584	0.952103
ENSDARG00000010591	foxn4	1.22311	0.588139	0.534187	0.918296	-1.72637	0.69201	-2.65708	0.293388	-0.574991	0.936418
ENSDARG00000010596	slc7a6os	-0.493425	0.897301	-0.798667	0.88938	-0.0243008	0.997867	-1.14371	0.769437	-2.18904	0.620577
ENSDARG00000010601	mtmr10	1.05098	0.528859	-0.0398697	0.992846	-0.377226	0.970291	0.127096	0.965786	-0.522963	0.922157
ENSDARG00000010602	zgc:112294	-0.0199386	0.999251	-0.668722	0.973074	-0.999757	#N/A	-8.68558	#N/A	-7.56983	0.322001
ENSDARG00000010603	kctd9b	0.726237	0.680555	-0.172297	0.972815	-0.493824	0.966549	-0.0412261	0.988512	0.190149	0.973451
ENSDARG00000010610	sarm1	1.84201	0.444696	0.1456	0.979662	-1.47743	0.831559	-2.4779	0.42729	-0.9572	0.899994
ENSDARG00000010619	themis	-2.0788	0.639549	-5.61087	0.280915	1.97367	0.899802	-3.59145	#N/A	-5.83288	0.364359
ENSDARG00000010625	clic2	-0.527285	0.598462	-0.242098	0.91497	3.32103	0.000367479	1.17477	0.298949	0.91539	0.56715
ENSDARG00000010630	hoxb6a	0.502923	0.762566	0.88466	0.672912	-0.749204	0.859605	-0.629586	0.764148	0.381773	0.933659
ENSDARG00000010641	slc20a1b	-0.707812	0.00803971	-0.101369	0.90418	0.268389	0.729308	0.596033	0.127329	0.57924	0.202485
ENSDARG00000010654	arhgap42b	0.404602	0.865909	-2.5395	0.141686	2.14222	0.4146	1.10488	#N/A	-3.25004	0.0993869
ENSDARG00000010655	ppm1k	-0.361469	0.708748	0.819435	0.42639	1.15462	0.318089	0.360749	0.786025	0.752049	0.606211
ENSDARG00000010658	insig1	-0.602926	0.505021	0.543431	0.712073	2.34694	0.0199372	-0.642786	0.609591	0.661552	0.715786
ENSDARG00000010662	fbxo36a	-0.331622	#N/A	-7.25329	#N/A	-0.00532993	#N/A	5.98549	#N/A	-1.80521	#N/A
ENSDARG00000010673	trim16	1.28103	0.256193	0.447358	0.871412	0.637718	0.89637	1.52372	0.32568	1.7638	0.315238
ENSDARG00000010680	gngt2a	5.62583	0.0318045	3.46342	0.168495	-0.999727	0.970291	-3.25397	#N/A	-2.15649	0.595276
ENSDARG00000010681	tjap1	0.425368	0.547223	-0.269608	0.85227	-1.33106	0.0892553	-0.0631571	0.960063	-0.956678	0.301973
ENSDARG00000010700	il17d	-1.91189	0.798179	-4.93127	0.576914	-1.53576	#N/A	-2.58653	#N/A	-1.80529	0.936098
ENSDARG00000010710	msi1	1.16243	0.280937	0.962417	0.551629	-4.02815	0.000354581	-1.99034	0.121095	-1.02249	0.62541
ENSDARG00000010712	npffr1l3	1.36834	#N/A	-2.05699	#N/A	-6.44222	#N/A	-4.4607	#N/A	-1.80522	#N/A
ENSDARG00000010717	chchd10	0.0718793	0.964402	0.808974	0.316713	0.787545	0.506523	1.33583	0.0861669	0.778484	0.484148
ENSDARG00000010721	sept6	-0.459152	0.399329	-0.0807849	0.967214	0.567357	0.567844	0.258306	0.773035	0.198578	0.9128
ENSDARG00000010727	ttyh2l	2.01823	0.000190276	-0.0327227	0.985167	1.23023	0.24577	2.21732	0.0022345	2.27943	0.00358569
ENSDARG00000010728	scin	-1.44829	0.719424	2.33898	0.652795	2.2208	0.81277	-0.614281	#N/A	-0.00536788	0.999978
ENSDARG00000010729		2.24543	#N/A	-2.93408	#N/A	-6.02715	#N/A	-4.47662	#N/A	-1.80521	#N/A
ENSDARG00000010732	xrcc4	0.365349	0.890555	0.238766	0.968727	0.00206291	0.999474	0.191862	0.953439	1.21512	0.743988
ENSDARG00000010738	zgc:101716	-0.492619	0.93749	-1.4493	0.839485	-0.421101	0.975534	0.277345	#N/A	-0.621929	0.961269
ENSDARG00000010745	dnaja2l	1.69638	0.0041623	-0.267398	0.88002	-1.5717	0.0839308	-0.338866	0.787708	0.0217775	0.995156
ENSDARG00000010752	acsl4b	-1.18862	0.214255	2.05273	0.0421462	1.51043	0.328633	0.524773	0.762391	1.90257	0.160209
ENSDARG00000010756	nod2	-0.890946	0.577899	1.41963	0.461548	1.36772	0.644084	3.83592	0.0458794	0.876817	0.806126
ENSDARG00000010758	capn12	-1.5732	0.415404	0.427498	0.935454	0.847401	0.925153	-1.70328	0.522692	-3.41706	0.16385
ENSDARG00000010764	flj13639	0.704854	0.919983	0.702247	0.956748	5.08848	0.546963	1.44929	#N/A	1.35108	0.92349
ENSDARG00000010767	epha4l	-1.69785	0.0235292	-1.58532	0.0977913	0.558278	0.84388	-0.236661	0.890621	-1.55027	0.212303
ENSDARG00000010770	sox19a	0.867128	0.380534	0.807461	0.5824	-4.67143	6.60167e-07	-2.09474	0.0505986	-1.37231	0.342221
ENSDARG00000010773	pnpla6	0.909704	0.122141	-1.0756	0.131883	0.771386	0.506523	0.537859	0.57728	0.56968	0.672572
ENSDARG00000010779	tlk2	-0.51419	0.375953	-0.946764	0.128966	-0.352781	0.846749	-0.474283	0.572058	-1.19677	0.0966794
ENSDARG00000010782	zgc:55621	-0.0199383	#N/A	-0.668713	#N/A	-0.999683	#N/A	-0.599086	#N/A	-1.80521	#N/A
ENSDARG00000010784	ppp1r12a	0.0689872	0.95647	-0.461878	0.59221	0.160544	0.970291	0.464117	0.573725	0.053002	0.982065
ENSDARG00000010785	thbs1b	0.201536	0.871734	1.19745	0.189146	-0.536773	0.817771	-0.451314	0.731631	-0.298946	0.912874
ENSDARG00000010789	homer3b	1.19955	0.0271207	0.296012	0.834993	-0.638368	0.622622	0.46612	0.640696	1.1467	0.194152
ENSDARG00000010791	dla	2.24146	0.000329969	-0.63864	0.607173	-4.2864	2.53826e-08	-1.71324	0.0528973	-1.41275	0.18745
ENSDARG00000010792	cdc25b	-2.127	2.33087e-07	0.301335	0.785835	-0.282355	0.901858	-1.30545	0.0317612	-0.767528	0.367695
ENSDARG00000010794	tfeb	1.98881	0.0524282	-0.283404	0.931831	0.642623	0.894615	2.8434	0.0319978	0.207302	0.96445
ENSDARG00000010816	slc7a14a	8.48219	0.00122365	0.997736	0.867541	-9.70915	0.00326915	-2.76362	0.429297	-1.23919	0.871901
ENSDARG00000010823	memo1	0.37181	0.726805	-0.744763	0.542235	0.0828487	0.981205	0.150176	0.927228	-0.745787	0.652357
ENSDARG00000010831	churc1	0.887912	0.583502	-0.0192394	0.995674	-0.11627	0.984976	1.15193	0.586106	1.31905	0.634243
ENSDARG00000010844	kras	1.45388	0.000399045	-0.649042	0.320131	-0.14761	0.970291	0.827815	0.204122	0.0724479	0.972626
ENSDARG00000010862	amt	-0.421638	0.725281	1.29174	0.239348	-0.0620702	0.987751	0.165664	0.928921	-0.0342218	0.99359
ENSDARG00000010873	si:dkey-156n14.5	0.416448	0.345114	-0.317559	0.662219	-0.485008	0.545342	0.026719	0.976341	0.123836	0.939204
ENSDARG00000010878	cdkn1ca	1.0021	0.294096	-0.432581	0.841766	-2.10733	0.0758923	-0.832351	0.556917	-0.486922	0.866962
ENSDARG00000010905	mettl13	-2.24002	0.00806725	1.24201	0.344741	0.564995	0.886441	0.0553781	0.98034	0.759959	0.750912
ENSDARG00000010918	nprl3	-1.40211	0.153603	-0.133794	0.972815	1.05565	0.623369	-1.21541	0.404966	-0.117526	0.979019
ENSDARG00000010925		-0.862836	0.807839	1.83964	0.6549	4.61778	0.40354	-3.55254	#N/A	-3.07345	0.426338
ENSDARG00000010933	cacna1fa	1.23878	0.62257	1.40517	0.707094	-0.443399	0.970291	-1.78406	0.564149	-2.69242	0.421059
ENSDARG00000010934	syt14a	-1.12748	0.588773	-0.0543518	0.992216	0.519296	0.970291	-0.723684	#N/A	0.083079	0.991248
ENSDARG00000010936	abcb4	1.20919	0.553239	2.61904	0.192054	-1.10132	0.858765	-1.40445	0.595304	0.982003	0.837147
ENSDARG00000010940		7.70091	0.000941053	1.37036	0.703505	-5.76431	0.0986388	0.772196	#N/A	2.19008	0.565817
ENSDARG00000010941	pomgnt2	-0.660705	0.732903	-0.64809	0.851076	-0.0286254	0.996085	-1.26878	0.56396	-0.66703	0.892011
ENSDARG00000010945	rapgef6	1.49227	0.0274673	-1.06581	0.267334	-0.495703	0.850429	1.50555	0.111881	0.106847	0.973451
ENSDARG00000010946	cbsb	0.182881	0.921657	-0.5467	0.795538	-0.822692	0.742397	0.817037	0.601724	-0.294403	0.938429
ENSDARG00000010948	kif11	-2.53704	4.84808e-16	0.0182017	0.987478	-0.0339004	0.985376	-1.53969	0.000366805	-1.06914	0.0398683
ENSDARG00000010953	ndel1a	1.27414	0.521895	0.942679	0.798814	0.620067	0.968454	-0.866564	0.777106	0.298547	0.96593
ENSDARG00000010956	sh3glb1b	-0.619712	0.532932	0.112444	0.972578	0.612103	0.813068	0.391411	0.804954	0.248821	0.940872
ENSDARG00000010957	mpp2b	1.65164	0.558778	0.933079	0.876019	-1.32172	0.897028	-2.41945	0.488173	-0.521304	0.956667
ENSDARG00000010958	glmnb	7.01813	0.0577648	2.66953	0.665351	-6.61229	0.255787	-1.55826	#N/A	0.151151	0.992148
ENSDARG00000010962	fkbp7	-0.265592	0.896874	1.22156	0.474261	0.240128	0.970291	-1.1468	0.517361	-0.276263	0.954114
ENSDARG00000010965	psma8	-0.173547	0.819336	-0.225263	0.855247	0.242261	0.927115	0.403307	0.622324	0.151292	0.93896
ENSDARG00000010977	rab34b	7.15064	5.69048e-07	-0.851972	0.839686	-0.596559	0.970291	6.38967	0.000878301	5.17019	0.0182085
ENSDARG00000010978	trmt1	-1.51654	0.0345512	0.056237	0.979053	0.764211	0.67609	0.83261	0.501938	-0.558789	0.788276
ENSDARG00000010981	zdhhc3a	0.628617	0.700652	-0.812772	0.737433	0.206299	0.973378	0.829204	0.69524	-0.840691	0.795789
ENSDARG00000011000	gtf2a1	0.135283	0.877467	-0.180323	0.899219	-0.446395	0.740478	-0.54819	0.484661	0.0103088	0.997288
ENSDARG00000011020	hnrnpa1a	0.114637	0.94736	-0.606001	0.662219	-0.593545	0.796224	-0.608311	0.636997	-0.404282	0.876237
ENSDARG00000011023	pdlim3a	6.11549	#N/A	-6.80414	#N/A	-0.999683	#N/A	0.771903	#N/A	-1.80521	#N/A
ENSDARG00000011026	zgc:92907	-0.646165	0.803888	-7.67634	0.00291693	-0.896	0.915595	1.38088	#N/A	-7.83288	0.00546528
ENSDARG00000011027	fgfr1a	-1.57656	0.0120254	-1.00966	0.274262	-0.68463	0.676023	-0.95167	0.348082	-3.36446	8.32993e-06
ENSDARG00000011042	pgbd5	6.91438	0.00383021	1.44783	0.682473	-0.999721	0.970291	-2.15183	#N/A	-0.326331	0.96721
ENSDARG00000011049	slc17a9b	-0.29426	0.843391	0.664247	0.709689	0.0113845	0.997867	0.287703	0.881727	-0.116758	0.977755
ENSDARG00000011055	fbxo9	0.73976	0.257156	-0.358529	0.792327	-0.271707	0.946633	-0.328871	0.772585	-0.881826	0.408881
ENSDARG00000011065	camk2b1	1.76996	1.03488e-05	-1.00944	0.0647863	1.32269	0.0356961	2.39463	1.81442e-06	1.85572	0.00107658
ENSDARG00000011066	glra3	5.25048	0.0834979	3.16417	0.359124	-6.24973	0.133287	-3.05673	#N/A	-0.0025757	0.999978
ENSDARG00000011072	ddx11	-2.27856	0.334813	1.3093	0.779723	-0.518894	0.970291	-0.724829	0.872742	-0.764518	0.928383
ENSDARG00000011076	zgc:91968	10.7536	8.9794e-06	-2.29295	0.493695	-8.79992	0.00647904	5.73181	0.040968	2.31647	0.628553
ENSDARG00000011079	wdr3	-1.23923	0.00661468	0.317385	0.773805	0.232917	0.941083	0.24185	0.809924	0.377355	0.784598
ENSDARG00000011083	si:dkey-42l23.2	6.65422	0.291729	0.426702	0.97834	-0.999764	#N/A	6.075	#N/A	1.52168	0.948126
ENSDARG00000011088	si:ch211-288d18.1	3.30782	0.00963726	-2.00457	0.271345	-2.26568	0.336555	-2.3411	0.206216	-3.85069	0.0283249
ENSDARG00000011091	drd2b	8.24976	0.00602999	-8.93842	0.0103571	-6.44237	0.171677	0.980016	#N/A	-1.80527	0.90009
ENSDARG00000011094	ccna2	-2.18483	3.25769e-05	-0.310089	0.840935	-0.70949	0.593283	-1.19395	0.149012	-1.34621	0.135084
ENSDARG00000011113	chrna10a	-0.0199385	0.999251	-0.668718	0.977183	-0.999787	#N/A	-0.599184	#N/A	-6.83284	0.616629
ENSDARG00000011122	pptc7a	0.486734	0.650107	0.440591	0.817698	0.462842	0.904537	0.0670602	0.96974	0.758713	0.680415
ENSDARG00000011125	snrpb	-1.52448	0.0138872	-0.442931	0.758348	-0.14863	0.970291	-0.507972	0.668769	-1.06585	0.352403
ENSDARG00000011141	dpysl5a	3.69568	0.00298145	0.403658	0.922045	-4.81045	0.00385145	-2.12273	0.279406	0.180807	0.977187
ENSDARG00000011146	uqcrb	1.65772	0.490439	-1.08297	0.820138	5.83771	0.19306	5.47331	#N/A	-0.317006	0.97142
ENSDARG00000011152	rpp14	-0.998011	0.277245	1.11134	0.352474	0.985687	0.593283	0.304393	0.866355	1.76282	0.174394
ENSDARG00000011157	arhgef18a	0.268171	0.822276	0.175457	0.945999	-1.01618	0.479101	0.853988	0.474573	-0.317466	0.911928
ENSDARG00000011163	sema3fa	0.893263	0.333072	0.435671	0.827385	-2.80458	0.00456218	-1.7498	0.0973708	-1.2311	0.387018
ENSDARG00000011166	cahz	-3.29989	1.3436e-11	-0.881828	0.277881	2.64329	0.000107712	-3.249	1.75616e-07	-0.812033	0.471274
ENSDARG00000011170	ndrg2	0.23808	0.79723	1.47875	0.0233606	1.16806	0.208322	-1.08509	0.185	0.577494	0.671056
ENSDARG00000011171	si:ch211-12m10.1	4.09984	7.50183e-05	0.404893	0.901368	-2.58653	0.141241	-2.18072	0.150027	-1.22748	0.606773
ENSDARG00000011175	atp6v1d	1.61751	0.0025783	-0.589319	0.55439	0.764717	0.537109	2.23764	0.00103072	1.2359	0.174133
ENSDARG00000011188	acvr2aa	1.94974	2.51567e-08	-0.261649	0.778602	-0.469354	0.623694	0.575264	0.361367	0.103728	0.954917
ENSDARG00000011190	fgfr1b	-1.24913	0.409497	0.078	0.982604	-0.787166	0.888857	-1.32545	0.528627	-1.63384	0.516396
ENSDARG00000011196	dnajc11a	-0.580751	0.287187	-0.0333498	0.98044	0.0362598	0.987751	0.216036	0.830862	0.0237644	0.991922
ENSDARG00000011201	rplp2l	-0.27013	0.680941	-0.861945	0.144896	0.0653947	0.976557	0.824251	0.214326	-0.88325	0.240968
ENSDARG00000011219	akt2	-0.399415	0.317183	-0.0832541	0.946574	-0.00714377	0.99629	-0.175658	0.804303	-0.149935	0.913141
ENSDARG00000011222	ccdc28b	-0.543589	0.861704	-0.90844	0.843257	-0.5934	0.970291	-2.38983	0.384502	-0.474257	0.952796
ENSDARG00000011233	pcyt1aa	-1.12038	0.321647	-0.0955912	0.97779	1.57218	0.375151	0.572337	0.76567	0.864722	0.731868
ENSDARG00000011235	otx2b	10.3918	5.14093e-10	-1.30688	0.127271	-10.5613	1.15967e-08	-2.33046	0.00350871	-2.78267	0.00064141
ENSDARG00000011239	ppp1r14aa	-1.19399	0.458101	-0.120119	0.978199	0.998063	0.826405	3.24699	0.0823177	-0.364758	0.949822
ENSDARG00000011240	ift46	1.56734	0.0114659	-0.387273	0.803343	-1.17554	0.284247	0.109338	0.941347	0.359718	0.879175
ENSDARG00000011245	esrp1	-0.36325	0.868165	1.60914	0.373079	-2.35884	0.218599	-2.5753	0.115173	-1.67154	0.466172
ENSDARG00000011246	krr1	-0.389874	0.69754	-0.412921	0.807011	-0.768283	0.640745	-0.351782	0.804444	-0.661678	0.695949
ENSDARG00000011247	rnpc3	0.446343	0.851798	-0.877493	0.780503	-0.382921	0.970291	0.1514	0.961354	-0.790774	0.868114
ENSDARG00000011257	enpp2	-1.14062	0.595998	1.15357	0.738598	0.707963	0.9538	-0.886575	0.782325	-2.35532	0.425983
ENSDARG00000011259	trpm1a	7.19957	0.00414258	2.74693	0.334248	-7.02734	0.0375388	-0.822252	0.844363	1.38725	0.811111
ENSDARG00000011262	traip	-2.70259	0.0499009	1.54779	0.492461	0.881862	0.883442	-1.92527	0.370128	0.797805	0.868718
ENSDARG00000011272	uqcc2	-0.0157401	0.999251	0.322655	0.867415	1.62564	0.14274	0.80806	0.492306	0.846047	0.579199
ENSDARG00000011273	tlx2	-3.50154	4.10116e-05	-0.0931615	0.977956	2.68418	0.0435072	-1.09982	0.490768	-1.53187	0.382339
ENSDARG00000011283	si:dkey-110k5.10	-5.90012	#N/A	-0.668713	#N/A	-0.369354	#N/A	-0.599086	#N/A	-1.80521	#N/A
ENSDARG00000011298	atf7a	-0.647039	0.303297	1.25587	0.050293	-0.243598	0.951984	0.323464	0.768363	0.381112	0.818478
ENSDARG00000011299	blzf1	-0.413677	0.541891	-0.383346	0.730884	1.09516	0.188221	0.118435	0.922414	0.637639	0.576163
ENSDARG00000011301	nae1	1.49238	0.00796435	-0.015043	0.994487	-0.707203	0.603697	0.847679	0.358403	0.758603	0.534407
ENSDARG00000011312	stk3	0.0942142	0.903061	-0.0176026	0.988919	0.53329	0.517301	0.40626	0.546612	0.715005	0.291502
ENSDARG00000011317	adra1ba	-1.6112	0.871847	-4.87853	0.664072	-4.01623	#N/A	3.61067	#N/A	-7.70728	0.488152
ENSDARG00000011326	ankrd45	4.41582	#N/A	-5.10448	#N/A	-0.999683	#N/A	3.83668	#N/A	-8.05503	#N/A
ENSDARG00000011333	arhgap33	-0.171274	0.820283	-0.322629	0.746581	-1.46833	0.0127807	-1.95566	0.000150002	-1.74134	0.00207455
ENSDARG00000011334	ncaldb	-9.95921	0.000102102	9.03168	0.00288496	4.91193	0.18098	-8.36368	0.0109919	-1.84212	0.750912
ENSDARG00000011360	nfatc2ip	-0.374639	0.819864	0.92576	0.609371	-0.0801325	0.98707	-0.865619	0.624403	0.949718	0.698277
ENSDARG00000011370	fyna	2.50776	0.000616238	-0.0366215	0.988159	-3.37007	0.000433492	-2.33235	0.0154937	-1.24052	0.374187
ENSDARG00000011371	zgc:64106	-0.0209911	0.999251	1.16477	0.779644	2.5144	0.558929	-0.144927	#N/A	1.0388	0.871594
ENSDARG00000011373	mknk2a	-3.16401	0.00682033	1.34581	0.518777	0.275295	0.970291	-1.94092	#N/A	-1.40263	0.591518
ENSDARG00000011376	dnase1l4.2	-6.40888	4.58973e-05	2.63955	0.295018	1.98792	0.622897	-2.68725	0.316585	1.13733	0.841423
ENSDARG00000011400	tnnc1a	2.02086	0.511084	-1.47485	0.798577	6.69626	0.0629712	13.1653	0.000383799	11.153	0.00676086
ENSDARG00000011404	fen1	-1.23985	0.0536548	0.797726	0.42298	-0.74434	0.610656	-0.154071	0.917288	-0.590851	0.708756
ENSDARG00000011405	rps9	0.0909707	0.951472	-0.551522	0.616046	0.0783393	0.978923	1.07712	0.210165	0.177415	0.946756
ENSDARG00000011407	col2a1b	0.619393	0.527087	1.41474	0.150226	-1.58149	0.183989	-1.56679	0.136836	-1.18623	0.393452
ENSDARG00000011410	aadat	0.665255	0.875359	-3.4474	0.308585	1.71913	0.847489	0.364374	#N/A	-3.54245	0.416839
ENSDARG00000011418	sigmar1	3.58344	3.98012e-07	-1.83907	0.0547599	0.293139	0.970291	3.82764	3.38488e-05	1.29914	0.384204
ENSDARG00000011422	ryr1a	2.85426	0.0541259	2.4056	0.221083	-3.18393	0.156124	-0.024593	0.994338	2.46601	0.330507
ENSDARG00000011434	ptger2a	-2.85031	0.0301183	2.04867	0.275222	2.48305	0.266943	-0.94671	0.710183	0.201955	0.973709
ENSDARG00000011445	elmsan1a	0.965322	0.0967562	-0.356991	0.781669	0.161271	0.970291	1.68465	0.0221149	-0.268668	0.903484
ENSDARG00000011449	fes	-2.27806	0.279625	-0.488976	0.93828	1.09938	0.904218	-0.303563	0.944261	-1.74501	0.702179
ENSDARG00000011459	gsna	2.88423	9.00927e-15	-0.518968	0.461906	-0.349497	0.820929	2.59219	6.94697e-08	1.58839	0.0051177
ENSDARG00000011462	otub1b	-0.277677	0.76233	1.07974	0.160535	0.160989	0.970291	-0.276719	0.82267	1.54007	0.0741571
ENSDARG00000011463		5.74545	#N/A	-6.43411	#N/A	-0.999693	#N/A	5.16631	#N/A	-7.24784	#N/A
ENSDARG00000011466	afg1la	-0.733104	0.626623	0.0408753	0.991057	1.70148	0.42085	0.209602	0.934689	0.335974	0.94537
ENSDARG00000011473	calcrla	-3.75621	0.000165312	1.64022	0.301466	3.5748	0.0154503	-1.5071	0.39059	-0.303783	0.95096
ENSDARG00000011487	gnaq	5.11699	2.51667e-05	-1.05227	0.645557	-3.24764	0.101129	0.351309	0.897789	1.7002	0.511673
ENSDARG00000011488	sirt2	1.08476	0.0204382	-0.449184	0.606892	0.146026	0.970291	1.76068	0.00277747	0.762749	0.398033
ENSDARG00000011490	scube3	-2.12214	0.142875	0.72859	0.836143	-0.243318	0.973986	-1.78714	0.409866	-1.97696	0.441756
ENSDARG00000011493	dcun1d3	-0.606847	0.651871	-0.90606	0.606234	-0.147839	0.975534	-0.592286	0.75101	-0.871955	0.723137
ENSDARG00000011496	ppm1bb	0.508076	0.280937	-0.570146	0.352444	-0.0486179	0.980805	0.377875	0.604365	-0.290173	0.817694
ENSDARG00000011498	si:ch211-212o1.2	0.22258	0.862482	0.239326	0.912778	1.00728	0.4985	2.63464	0.00342258	1.97746	0.0602049
ENSDARG00000011506	lpcat1	-0.301793	0.849757	-0.240818	0.93765	0.744578	0.804353	0.710092	0.675585	0.313711	0.93636
ENSDARG00000011510	rcc2	0.0192926	0.999251	-0.0560597	0.97603	-1.0311	0.166907	-1.15391	0.0708415	-0.813698	0.336511
ENSDARG00000011515	orai1a	-2.43518	0.0300049	0.917219	0.69153	2.60879	0.143523	-0.235911	0.928921	-0.282389	0.956667
ENSDARG00000011519	myl4	5.1857	0.169975	4.14167	0.347682	-6.44236	0.235381	-2.29554	#N/A	5.76811	0.308339
ENSDARG00000011521	upb1	0.0727131	0.999251	3.28238	0.106324	-1.46568	0.760896	2.11504	0.451459	1.86	0.599378
ENSDARG00000011533	sema6dl	-0.807507	0.403352	-0.421172	0.84022	-1.53641	0.238148	-1.4908	0.19287	-1.52961	0.245603
ENSDARG00000011537	ugt2a5	1.81196	0.244437	2.4396	0.158199	0.316556	0.970944	-0.405127	#N/A	2.36377	0.312016
ENSDARG00000011545	arrb2b	-0.573986	0.243478	0.605286	0.353606	0.585079	0.524953	0.820372	0.195698	1.41777	0.0158028
ENSDARG00000011549	c1ql4a	6.01314	0.228133	1.60811	0.892581	-8.0862	0.261381	-2.6525	#N/A	6.50463	0.463817
ENSDARG00000011553	atp5pb	0.577975	0.0758907	0.198754	0.790792	0.150485	0.946248	1.04412	0.00791302	0.699383	0.155443
ENSDARG00000011555	spag7	0.225736	0.798762	0.192052	0.907411	0.27577	0.93548	0.383083	0.714462	0.893311	0.367916
ENSDARG00000011564	sfpq	0.640819	0.00334346	-0.518069	0.0652307	-1.36083	3.05647e-07	-0.886041	0.00122285	-0.630775	0.0570435
ENSDARG00000011570	pou6f1	-0.0822347	0.965059	0.245383	0.899631	-0.827527	0.556754	-1.34373	0.135437	-0.651977	0.674165
ENSDARG00000011571	calcrlb	-2.74694	0.304439	-1.13414	0.856583	2.25539	0.719697	-0.345171	0.949834	-1.3607	0.867085
ENSDARG00000011573	abcb11a	0.887442	0.851463	3.22209	0.445961	4.62385	0.508227	-1.93706	#N/A	3.58889	0.509269
ENSDARG00000011579	hoxb10a	-1.72701	0.599238	-1.43645	0.816383	-0.538263	0.970291	-2.28951	#N/A	-4.45604	0.278628
ENSDARG00000011581	si:dkey-23k10.5	-1.19136	0.829345	-6.16612	0.224796	2.6053	0.820929	-0.0723928	#N/A	-2.86909	0.798288
ENSDARG00000011582	sox5	2.37853	4.58283e-15	-0.250105	0.754052	-1.07858	0.0268846	0.583543	0.278104	0.3267	0.721125
ENSDARG00000011583	cry1ab	1.79921	0.00617422	-0.0215641	0.992784	0.288375	0.966127	2.41794	0.00496297	0.984473	0.46713
ENSDARG00000011594	smarcb1b	0.118262	0.901766	-0.326417	0.769085	-0.902381	0.270455	-1.22308	0.0565287	-0.194319	0.925078
ENSDARG00000011597	atxn2l	-0.653193	0.170061	-0.211708	0.859081	-0.258694	0.908031	-0.928698	0.126712	-0.0388425	0.986076
ENSDARG00000011600	epha4b	1.93041	0.442506	-0.748168	0.903134	-3.49698	0.324135	-1.93767	0.583087	-1.55343	0.788968
ENSDARG00000011602	si:dkeyp-117h8.2	4.65508	6.63537e-12	0.309513	0.870829	-2.6515	0.0109222	-1.79826	0.0413395	0.232732	0.937479
ENSDARG00000011605	dennd6b	-2.07044	0.0987789	0.0639066	0.986215	0.877582	0.844927	-2.3684	0.162386	-1.24583	0.66045
ENSDARG00000011609	si:ch211-262e15.1	-0.22181	0.75128	0.0310196	0.981056	-0.857169	0.255787	-1.19524	0.0437323	-0.508573	0.618703
ENSDARG00000011611	actr1	1.16373	8.27858e-05	-0.716557	0.0727782	-0.457052	0.497158	0.986475	0.0175904	0.481737	0.44814
ENSDARG00000011613	rbm39a	-0.563977	0.201822	0.518016	0.402462	-0.0472181	0.980805	-0.428235	0.528043	-0.283799	0.815786
ENSDARG00000011615	mybpc3	1.71901	0.147992	-1.50359	0.367667	4.95101	0.000469223	5.41814	1.79336e-05	4.87962	0.000579854
ENSDARG00000011618	slc26a2	3.55657	5.42841e-15	-1.61708	0.00497751	0.79657	0.490999	2.96634	5.97836e-07	0.708979	0.520024
ENSDARG00000011635	scxb	6.84705	0.304736	-7.53571	0.394367	-0.999692	#N/A	-1.60091	#N/A	-8.05516	0.463986
ENSDARG00000011640	syt5b	1.91359	0.0348907	1.86019	0.0865813	6.19387	0.0542039	-1.92585	0.109732	-1.28883	0.43402
ENSDARG00000011648	snrpd1	-0.612383	0.527795	-0.0713065	0.978057	-0.249236	0.970291	-0.241758	0.885855	-0.424734	0.876136
ENSDARG00000011652	si:zfos-979f1.2	3.54627	0.287582	-1.29811	0.871602	-0.333057	0.981661	1.78578	#N/A	0.0326995	0.998582
ENSDARG00000011652	ftr52p	3.54627	0.287582	-1.29811	0.871602	-0.333057	0.981661	1.78578	#N/A	0.0326995	0.998582
ENSDARG00000011661	twf1b	-0.0412662	0.999251	0.212692	0.938463	0.0594209	0.987751	-0.512383	0.744822	-0.543928	0.829596
ENSDARG00000011662	chuk	1.24574	0.00462561	-0.324275	0.753537	-0.235318	0.935681	1.64001	0.00383127	0.912319	0.238371
ENSDARG00000011665	aldoaa	0.696075	0.0294626	-0.629972	0.127904	-0.120734	0.970291	1.71677	1.72716e-06	0.848927	0.0708861
ENSDARG00000011671	pde6b	-1.14624	0.742312	1.42045	0.794448	1.34162	0.912417	-0.384067	#N/A	-2.36611	0.652547
ENSDARG00000011672	sema3b	1.35498	0.180053	0.125187	0.973304	-2.85938	0.0201245	-1.63421	0.223242	-1.82484	0.222662
ENSDARG00000011673	si:ch211-246m6.5	0.41367	0.95446	-0.820391	0.926377	-2.21174	0.814094	-1.61315	#N/A	-1.95107	0.81896
ENSDARG00000011683	prtfdc1	4.11137	8.35482e-10	-0.795943	0.555197	0.0368418	0.991167	5.17882	1.23314e-09	4.18648	7.03982e-06
ENSDARG00000011693	ttc36	5.57761	0.0261727	4.49592	0.0264936	-5.02734	0.191511	-0.903645	0.809509	0.732915	0.916478
ENSDARG00000011696	esrrgb	-0.0199383	#N/A	7.44488	#N/A	-7.44214	#N/A	-5.36353	#N/A	1.86585	#N/A
ENSDARG00000011701	ctsll	5.88794	#N/A	-6.57659	#N/A	-5.44221	#N/A	5.30879	#N/A	-1.80521	#N/A
ENSDARG00000011703	clocka	1.17952	0.0198574	0.377135	0.729236	-0.332293	0.893429	-0.806421	0.296581	-0.762609	0.426346
ENSDARG00000011723	zgc:56556	0.280108	0.923894	-1.05239	0.715173	-0.668922	0.941083	-0.0691904	0.983923	-0.0934173	0.989563
ENSDARG00000011724	marveld1	-0.874424	0.343006	0.778221	0.576914	1.31732	0.357402	0.381295	0.816929	1.38107	0.322001
ENSDARG00000011727	b9d1	-2.44792	0.00305447	1.37579	0.26783	0.44008	0.93427	-2.5029	0.0259002	-0.73244	0.75504
ENSDARG00000011740	u2af2b	-0.945576	0.0218561	0.279013	0.773189	-0.258451	0.897028	-0.713036	0.253101	0.331784	0.781696
ENSDARG00000011743	pigo	-0.586837	0.710472	-0.527169	0.855937	-0.0531072	0.990603	-0.676864	0.745907	-0.78269	0.805281
ENSDARG00000011764	ints13	-0.477882	0.57524	-0.979161	0.282202	0.899932	0.491578	0.216535	0.880657	-0.109728	0.971001
ENSDARG00000011769	cpm	0.0418869	0.999251	2.11917	0.355228	-1.40322	0.754556	-2.16317	0.367592	-0.742366	0.901658
ENSDARG00000011770	dhrs12	1.80601	0.00704387	-0.696557	0.578849	0.71918	0.704885	3.7999	2.40858e-06	1.65164	0.127702
ENSDARG00000011777	cttn	0.770114	0.305273	-1.33125	0.10046	0.497752	0.832598	0.410566	0.745907	-0.50983	0.784438
ENSDARG00000011783	stag2a	0.427149	0.285261	-0.118732	0.910511	0.519268	0.453289	0.487862	0.375934	-0.091488	0.9542
ENSDARG00000011785	tbx6	-1.78379	0.612391	-7.39005	0.0485001	-2.92872	0.627332	-0.407888	#N/A	-1.80524	0.89972
ENSDARG00000011797	tent5bb	1.20611	0.590163	1.8815	0.486434	5.93482	0.148411	-2.14794	0.415883	-0.912122	0.878807
ENSDARG00000011801	wars2	2.33449	0.373141	0.528512	0.945999	-4.03363	0.266724	-0.519599	#N/A	-0.857826	0.923833
ENSDARG00000011809	mical1	-1.55649	0.455304	1.25109	0.725781	-0.0371923	0.996085	-1.76807	0.53341	-1.15063	0.824277
ENSDARG00000011818	batf	-0.0199383	#N/A	-0.668713	#N/A	-3.44228	#N/A	-0.599086	#N/A	-1.80521	#N/A
ENSDARG00000011819	pcnx1	-0.332385	0.623392	0.245376	0.852641	-0.719935	0.453919	-1.08945	0.103907	-0.651785	0.510993
ENSDARG00000011821	plod2	2.3115	7.39166e-05	-0.535521	0.673943	-0.415905	0.890039	0.869543	0.398248	-0.945054	0.439837
ENSDARG00000011824	pbxip1b	1.28987	0.294214	0.0971293	0.97834	-1.13012	0.676471	0.779615	0.700199	-0.647268	0.85639
ENSDARG00000011825	cetn3	-0.806704	0.816176	-1.07049	0.847948	-0.00557057	0.999368	0.449577	#N/A	-0.480279	0.961269
ENSDARG00000011837	zgc:100846	1.3702	0.113209	0.226322	0.933071	1.53748	0.312063	1.02011	0.448176	3.32197	0.00310781
ENSDARG00000011841	atp5l	0.434028	0.674795	-0.0636397	0.97834	1.54317	0.188178	1.10136	0.324325	0.178358	0.956667
ENSDARG00000011845	chn2	4.99973	2.55308e-06	-0.847595	0.726386	-1.00134	0.817082	2.88289	0.0616083	0.522953	0.909349
ENSDARG00000011851	map2k5	0.545679	0.615868	0.243389	0.922045	0.0130463	0.997339	0.117557	0.950202	0.815001	0.668358
[truncated: 23,939 more rows]
