# Supplementary material for: Dynamics of cardiomyocyte transcriptome and chromatin landscape demarcates key events of heart development
Source: HighWire-hosted journal article supplement (doi:10.1101/gr.244491.118), 2019-02-13
Supplement: Supplement_Table_3.xlsx [file Supplement_Table_3.xlsx]

## Sheet: Sheet1
Supplement Table 3. List of WGCNA modules and genes.
module	ENSEMBL_ID	ZFIN_ID
black	ENSDARG00000000001	slc35a5
black	ENSDARG00000001906	si:dkey-247m21.3
black	ENSDARG00000002077	mnat1
black	ENSDARG00000002347	cyp11a1
black	ENSDARG00000002508	ankrd33ab
black	ENSDARG00000002670	zgc:113944
black	ENSDARG00000002959	gpr34b
black	ENSDARG00000003054	tacr3l
black	ENSDARG00000003257	zgc:101559
black	ENSDARG00000003475	sult1st5
black	ENSDARG00000003701	cldng
black	ENSDARG00000003903	hapln2
black	ENSDARG00000004015	adcyap1a
black	ENSDARG00000004459	unc119.2
black	ENSDARG00000004498	xkr8.1
black	ENSDARG00000004577	zgc:194665
black	ENSDARG00000004721	mpp5b
black	ENSDARG00000004932	anos1b
black	ENSDARG00000005185	cpn1
black	ENSDARG00000005814	klhl10a
black	ENSDARG00000005846
black	ENSDARG00000006109	pimr185
black	ENSDARG00000006501	cyp2x10.2
black	ENSDARG00000006602	chrna2a
black	ENSDARG00000006678	pth2r
black	ENSDARG00000006924	fbxo38
black	ENSDARG00000007097	her13
black	ENSDARG00000007250	use1
black	ENSDARG00000007349	dmrt1
black	ENSDARG00000007465	tdrd1
black	ENSDARG00000007906	lrp2b
black	ENSDARG00000008019	mxg
black	ENSDARG00000008098	ifit9
black	ENSDARG00000008164	btr33
black	ENSDARG00000008835	si:dkey-46g23.5
black	ENSDARG00000009242	fev
black	ENSDARG00000009402	si:ch211-210b2.2
black	ENSDARG00000009653	lhfpl2a
black	ENSDARG00000009673	si:ch211-197g15.6
black	ENSDARG00000009693	llgl1
black	ENSDARG00000010145	tor4aa
black	ENSDARG00000011701	ctsll
black	ENSDARG00000012138	sgce
black	ENSDARG00000012355	galnt8a.1
black	ENSDARG00000012539	dnase1
black	ENSDARG00000014366	luc7l3
black	ENSDARG00000014373	ddx4
black	ENSDARG00000014402	smc1b
black	ENSDARG00000014657	zgc:171731
black	ENSDARG00000014722	her1
black	ENSDARG00000014805	fhl5
black	ENSDARG00000014916	slc10a2
black	ENSDARG00000015076	gja8b
black	ENSDARG00000015158	slc50a1
black	ENSDARG00000015445	lim2.4
black	ENSDARG00000015657	zgc:77112
black	ENSDARG00000015860	mtmr9
black	ENSDARG00000016084	spsb4a
black	ENSDARG00000016494	ddc
black	ENSDARG00000017108	kcna1b
black	ENSDARG00000017234	npy8ar
black	ENSDARG00000017314	zgc:92041
black	ENSDARG00000017340	uts2b
black	ENSDARG00000017437	adcy3b
black	ENSDARG00000017880	kcnip3b
black	ENSDARG00000017917	her7
black	ENSDARG00000018530	mapkapk2b
black	ENSDARG00000018619	cers4b
black	ENSDARG00000019338	adprhl2
black	ENSDARG00000019396	rergla
black	ENSDARG00000019585	gstk2
black	ENSDARG00000019686	fgl2b
black	ENSDARG00000020354	lmx1a
black	ENSDARG00000020483	lta
black	ENSDARG00000020749	caprin2
black	ENSDARG00000021055	isl1l
black	ENSDARG00000021557	wdr45b
black	ENSDARG00000023858	ccdc174
black	ENSDARG00000024139	p2rx8
black	ENSDARG00000024844	max
black	ENSDARG00000025013	gna14a
black	ENSDARG00000025386	lsm14b
black	ENSDARG00000025518	zgc:101679
black	ENSDARG00000026183	polr2eb
black	ENSDARG00000026338	styxl1
black	ENSDARG00000026904	cbln13
black	ENSDARG00000027192	hcn3
black	ENSDARG00000027599	fam221a
black	ENSDARG00000027620	bco2l
black	ENSDARG00000027639	zgc:165539
black	ENSDARG00000028541	si:ch211-121a2.4
black	ENSDARG00000028894	mrgbp
black	ENSDARG00000028973	tekt2
black	ENSDARG00000029057	tm6sf2
black	ENSDARG00000029556	kansl3
black	ENSDARG00000029581	tbc1d7
black	ENSDARG00000029635	si:dkey-47k20.3
black	ENSDARG00000030621	th
black	ENSDARG00000030867	opn7c
black	ENSDARG00000030964	pde12
black	ENSDARG00000031161	nr1d4a
black	ENSDARG00000031293	dnajc9
black	ENSDARG00000032808	tdrd7a
black	ENSDARG00000032885	si:ch211-226m7.4
black	ENSDARG00000033071	trim35-10
black	ENSDARG00000033596	polr2c
black	ENSDARG00000034138	shisa2a
black	ENSDARG00000034207	cx44.2
black	ENSDARG00000035028	lpcat4
black	ENSDARG00000035169	layna
black	ENSDARG00000035377	fgf5
black	ENSDARG00000035601	dao.3
black	ENSDARG00000035606	aldh3b2
black	ENSDARG00000035861	si:rp71-39b20.4
black	ENSDARG00000035942	hrh3
black	ENSDARG00000036152	gas2b
black	ENSDARG00000036222	npy
black	ENSDARG00000036567	aanat1
black	ENSDARG00000036748	nitr8
black	ENSDARG00000036974	ripply3
black	ENSDARG00000037002	zgc:152968
black	ENSDARG00000037033	ptger2b
black	ENSDARG00000037359	si:ch1073-272o11.3
black	ENSDARG00000037402	lim2.3
black	ENSDARG00000037427	si:ch211-39a7.1
black	ENSDARG00000037514	hdac3
black	ENSDARG00000037537	ccnq
black	ENSDARG00000037843	tor4aa
black	ENSDARG00000037929	strada
black	ENSDARG00000037946	prl
black	ENSDARG00000038186	zgc:103564
black	ENSDARG00000038248	ggact.2
black	ENSDARG00000038321	zgc:172053
black	ENSDARG00000038728	ch25hl2
black	ENSDARG00000038891
black	ENSDARG00000038956	fdx1b
black	ENSDARG00000039063
black	ENSDARG00000039726	zgc:123321
black	ENSDARG00000039806	tbxtb
black	ENSDARG00000039937	ccdc172
black	ENSDARG00000039989	snrnp48
black	ENSDARG00000040004	si:ch211-244a23.1
black	ENSDARG00000040246	rap2ab
black	ENSDARG00000040258	si:ch73-340m8.2
black	ENSDARG00000040280	zgc:110182
black	ENSDARG00000040443	polr2i
black	ENSDARG00000040703
black	ENSDARG00000040799	sst1.1
black	ENSDARG00000040921	zmp:0000000606
black	ENSDARG00000040925	wnt10b
black	ENSDARG00000040948	olig1
black	ENSDARG00000040965	zgc:101731
black	ENSDARG00000041141	cryba1a
black	ENSDARG00000041145	paqr5a
black	ENSDARG00000041358	lgi3
black	ENSDARG00000041375	si:ch211-57i17.5
black	ENSDARG00000041462	pimr183
black	ENSDARG00000041515	rasal1b
black	ENSDARG00000041550	pimr138
black	ENSDARG00000041554	unc93a
black	ENSDARG00000041617	nme5
black	ENSDARG00000041689	usf1
black	ENSDARG00000041791	mgat4c
black	ENSDARG00000041853	rbm39b
black	ENSDARG00000041873	si:dkey-221h15.4
black	ENSDARG00000042577	batf3
black	ENSDARG00000042643	si:ch1073-440p11.2
black	ENSDARG00000042803	rab3c
black	ENSDARG00000042825	rnf169
black	ENSDARG00000042983	has1
black	ENSDARG00000043011	chst14
black	ENSDARG00000043196	rnasel2
black	ENSDARG00000043271	morc3b
black	ENSDARG00000043396	fndc4a
black	ENSDARG00000043442	zgc:153665
black	ENSDARG00000043485	si:ch211-22i13.2
black	ENSDARG00000043518	si:dkey-239i20.2
black	ENSDARG00000043912	mei4
black	ENSDARG00000043918
black	ENSDARG00000044204	endou
black	ENSDARG00000044280	opn1mw2
black	ENSDARG00000044357	tbc1d23
black	ENSDARG00000044524	def6b
black	ENSDARG00000044672	parapinopsinb
black	ENSDARG00000044797	cd8a
black	ENSDARG00000044899	tmem183a
black	ENSDARG00000044900	prlhr2a
black	ENSDARG00000044973	zgc:171226
black	ENSDARG00000045137
black	ENSDARG00000045156	rgs9b
black	ENSDARG00000045360	flj11011l
black	ENSDARG00000045549	bik
black	ENSDARG00000045589	kcnj8
black	ENSDARG00000045737	guca1g
black	ENSDARG00000045755	ccdc59
black	ENSDARG00000045951	kat5b
black	ENSDARG00000046140	zgc:112038
black	ENSDARG00000051851	ctu2
black	ENSDARG00000052188	znf541
black	ENSDARG00000052351	si:dkey-156n14.3
black	ENSDARG00000052626
black	ENSDARG00000052876
black	ENSDARG00000052881	dnajb5
black	ENSDARG00000052900	zgc:153642
black	ENSDARG00000053240	kif6
black	ENSDARG00000053345	si:dkey-56i24.1
black	ENSDARG00000053366	ftr12
black	ENSDARG00000053449	pyya
black	ENSDARG00000053450	ftr06
black	ENSDARG00000053460	si:dkey-283b1.7
black	ENSDARG00000053644	got1l1
black	ENSDARG00000053648	or135-1
black	ENSDARG00000053779	si:ch211-218m3.13
black	ENSDARG00000053938	si:ch211-137j23.8
black	ENSDARG00000053966	cyp17a2
black	ENSDARG00000054152	nmbr
black	ENSDARG00000054181	valopb
black	ENSDARG00000054196	slc38a8b
black	ENSDARG00000054734	or116-1
black	ENSDARG00000054946	mc5rb
black	ENSDARG00000055123	kcnk2a
black	ENSDARG00000055177	pxdc1a
black	ENSDARG00000055445	slc22a15
black	ENSDARG00000055525	lgalslb
black	ENSDARG00000055712	sdhda
black	ENSDARG00000055994	v2rh1
black	ENSDARG00000056400	helt
black	ENSDARG00000056506	si:ch73-113g13.2
black	ENSDARG00000056917	si:rp71-45g20.4
black	ENSDARG00000056954	si:dkeyp-38g8.5
black	ENSDARG00000057025	chrna2b
black	ENSDARG00000057334	cmasa
black	ENSDARG00000057635	wdr34
black	ENSDARG00000057660	dhx57
black	ENSDARG00000057661	aldoca
black	ENSDARG00000057677	neu4
black	ENSDARG00000057887	nts
black	ENSDARG00000057939	ythdf3
black	ENSDARG00000058306	prpf18
black	ENSDARG00000058370	ropn1l
black	ENSDARG00000058503	flt3
black	ENSDARG00000058578	ccdc106b
black	ENSDARG00000058685	si:dkey-204a24.11
black	ENSDARG00000058736	gabra6b
black	ENSDARG00000058800	rab25a
black	ENSDARG00000058880	cldnj
black	ENSDARG00000058937	cldn10a
black	ENSDARG00000058944	si:dkey-8e10.3
black	ENSDARG00000058978	zgc:113423
black	ENSDARG00000058995	jmjd4
black	ENSDARG00000059056	ft1
black	ENSDARG00000059081
black	ENSDARG00000059121
black	ENSDARG00000059629	asphd2
black	ENSDARG00000059695	dusp28
black	ENSDARG00000059899
black	ENSDARG00000059903	hs3st3l
black	ENSDARG00000059917	ccnj
black	ENSDARG00000059948	si:dkey-121b10.7
black	ENSDARG00000060264	si:dkey-37g12.1
black	ENSDARG00000060400	gpr185a
black	ENSDARG00000060498	tnfrsf9a
black	ENSDARG00000060529	nkx6.3
black	ENSDARG00000060748	tsfm
black	ENSDARG00000060829	car15
black	ENSDARG00000060884	nmur1a
black	ENSDARG00000061185	nat15
black	ENSDARG00000061357	chst6
black	ENSDARG00000061541	unc5db
black	ENSDARG00000061697	ca14
black	ENSDARG00000062057	zgc:174945
black	ENSDARG00000062142	stoml1
black	ENSDARG00000062377
black	ENSDARG00000062502	si:ch73-196l6.5
black	ENSDARG00000062712	tmem264
black	ENSDARG00000062897	tnksb
black	ENSDARG00000062924	si:ch211-243o19.4
black	ENSDARG00000063169	ubn1
black	ENSDARG00000063293	neto2b
black	ENSDARG00000067592
black	ENSDARG00000067806	zgc:158432
black	ENSDARG00000068122	cfap77
black	ENSDARG00000068122	si:ch211-215c18.3
black	ENSDARG00000068126	nppc
black	ENSDARG00000068138	ch25hl1.2
black	ENSDARG00000068145	pimr180
black	ENSDARG00000068193	tmem44
black	ENSDARG00000068232	cbln12
black	ENSDARG00000068240	trim110
black	ENSDARG00000068283	cyp2x10.2
black	ENSDARG00000068465	zgc:136254
black	ENSDARG00000068542
black	ENSDARG00000068742
black	ENSDARG00000068846	zgc:66024
black	ENSDARG00000068856	f2rl1.1
black	ENSDARG00000068923	umodl1
black	ENSDARG00000068976	bsx
black	ENSDARG00000069082	mrm3b
black	ENSDARG00000069129	fhdc3
black	ENSDARG00000069143	map3k7cl
black	ENSDARG00000069252	mixl1
black	ENSDARG00000069321	fam169b
black	ENSDARG00000069382	mxtx1
black	ENSDARG00000069589	tmem222a
black	ENSDARG00000069598	chrm5b
black	ENSDARG00000069607	zgc:162331
black	ENSDARG00000069698	lrguk
black	ENSDARG00000069745	slc35f2
black	ENSDARG00000069801	crygm2d12
black	ENSDARG00000069852	lipt2
black	ENSDARG00000070013	dmrt2b
black	ENSDARG00000070015	pimr173
black	ENSDARG00000070041	zgc:153920
black	ENSDARG00000070056	adora1a
black	ENSDARG00000070059	si:ch211-262i1.5
black	ENSDARG00000070467	lactbl1b
black	ENSDARG00000070624	cacng7b
black	ENSDARG00000070658	zbtb12.2
black	ENSDARG00000070676	ifnphi3
black	ENSDARG00000070746	sft2d2a
black	ENSDARG00000070810	ccka
black	ENSDARG00000070890
black	ENSDARG00000070950	styk1a
black	ENSDARG00000070966	insl5a
black	ENSDARG00000070986	sergef
black	ENSDARG00000071091	chrm3a
black	ENSDARG00000071261	zmp:0000001139
black	ENSDARG00000071272	ncoa6
black	ENSDARG00000071306	gip
black	ENSDARG00000071409	arl3
black	ENSDARG00000071492	fbxo45
black	ENSDARG00000071553	zgc:171500
black	ENSDARG00000071868	znf711
black	ENSDARG00000073723	zgc:194679
black	ENSDARG00000073821	znf1177
black	ENSDARG00000073913	pimr213
black	ENSDARG00000073947	si:dkeyp-67e1.6
black	ENSDARG00000074160	paqr4b
black	ENSDARG00000074253	olig3
black	ENSDARG00000074265	dzip1l
black	ENSDARG00000074298	znf1015
black	ENSDARG00000074387	alkal1
black	ENSDARG00000074456	setd9
black	ENSDARG00000074571	gpaa1
black	ENSDARG00000074653	si:ch211-233m11.1
black	ENSDARG00000074773	si:dkey-110g7.8
black	ENSDARG00000075090
black	ENSDARG00000075123	trafd1
black	ENSDARG00000075203	zgc:195212
black	ENSDARG00000075248	zgc:172133
black	ENSDARG00000075332	si:ch211-119d14.3
black	ENSDARG00000075345	si:ch211-76l23.7
black	ENSDARG00000075515	cd37
black	ENSDARG00000075599	cdc25d
black	ENSDARG00000075932	si:ch73-211l2.3
black	ENSDARG00000076013	mab21l3
black	ENSDARG00000076040	arl15a
black	ENSDARG00000076238	gramd1c
black	ENSDARG00000076277
black	ENSDARG00000076476	zgc:173770
black	ENSDARG00000076530	jac6
black	ENSDARG00000076634	capn10
black	ENSDARG00000076959	si:ch211-38m6.6
black	ENSDARG00000077078	zgc:173726
black	ENSDARG00000077161	ccdc153
black	ENSDARG00000077290	mmp25a
black	ENSDARG00000077382	si:rp71-68n21.12
black	ENSDARG00000077427	gpr20
black	ENSDARG00000077487	spsb3b
black	ENSDARG00000077637	mal2
black	ENSDARG00000077643	lypd6b
black	ENSDARG00000077858	asip1
black	ENSDARG00000077899	si:dkey-28d5.11
black	ENSDARG00000077900	si:ch211-141o9.10
black	ENSDARG00000077998	nitr3c
black	ENSDARG00000078034	zgc:112001
black	ENSDARG00000078068	abcg4b
black	ENSDARG00000078138	si:ch211-202h22.8
black	ENSDARG00000078247	vip
black	ENSDARG00000078254	ftr14l
black	ENSDARG00000078283	si:zfos-323e3.4
black	ENSDARG00000078394
black	ENSDARG00000078451	gzm3
black	ENSDARG00000078504	si:ch73-60h1.1
black	ENSDARG00000078738	si:dkey-145c18.3
black	ENSDARG00000078761	rmdn2
black	ENSDARG00000078767	yeats2
black	ENSDARG00000078828	npb
black	ENSDARG00000078854	tusc3
black	ENSDARG00000078922
black	ENSDARG00000078929	abhd16a
black	ENSDARG00000078994	muc2.2
black	ENSDARG00000079035	zgc:174573
black	ENSDARG00000079183	sod3b
black	ENSDARG00000079221	si:ch211-162k9.6
black	ENSDARG00000079234	si:ch211-285c6.2
black	ENSDARG00000079391	mrpl42
black	ENSDARG00000079519	eys
black	ENSDARG00000079532	zgc:194242
black	ENSDARG00000079589	si:dkeyp-73d8.6
black	ENSDARG00000079614	ftr34
black	ENSDARG00000079957	eloal
black	ENSDARG00000080032
black	ENSDARG00000080075
black	ENSDARG00000080129
black	ENSDARG00000080276
black	ENSDARG00000080351
black	ENSDARG00000080384
black	ENSDARG00000080450
black	ENSDARG00000080647
black	ENSDARG00000080744
black	ENSDARG00000080855
black	ENSDARG00000080902
black	ENSDARG00000081103
black	ENSDARG00000081163
black	ENSDARG00000081232
black	ENSDARG00000081369
black	ENSDARG00000081399
black	ENSDARG00000081445
black	ENSDARG00000081745
black	ENSDARG00000081875
black	ENSDARG00000081915
black	ENSDARG00000082031
black	ENSDARG00000082394
black	ENSDARG00000082493
black	ENSDARG00000082511
black	ENSDARG00000082598
black	ENSDARG00000082628
black	ENSDARG00000082646
black	ENSDARG00000082652
black	ENSDARG00000082823
black	ENSDARG00000082850
black	ENSDARG00000083179
black	ENSDARG00000083268
black	ENSDARG00000083326
black	ENSDARG00000083421
black	ENSDARG00000083528
black	ENSDARG00000083541
black	ENSDARG00000083807
black	ENSDARG00000083826
black	ENSDARG00000083966
black	ENSDARG00000084040
black	ENSDARG00000084075
black	ENSDARG00000084398
black	ENSDARG00000084449
black	ENSDARG00000084543
black	ENSDARG00000084670
black	ENSDARG00000084789
black	ENSDARG00000084828
black	ENSDARG00000084957
black	ENSDARG00000084959
black	ENSDARG00000085584
black	ENSDARG00000086055	si:dkey-7e14.3
black	ENSDARG00000086056	plekhg6
black	ENSDARG00000086204	gsg1l2a
black	ENSDARG00000086245	si:dkeyp-121d2.7
black	ENSDARG00000086419
black	ENSDARG00000086460	si:dkey-83f18.10
black	ENSDARG00000086522	zp2.5
black	ENSDARG00000086584
black	ENSDARG00000086603	zgc:136963
black	ENSDARG00000086712	si:dkeyp-97b10.3
black	ENSDARG00000086720	znf1023
black	ENSDARG00000086877	mhc1zda
black	ENSDARG00000086888
black	ENSDARG00000087016	micall1b.2
black	ENSDARG00000087046	si:ch211-222k6.2
black	ENSDARG00000087059	selenou1b
black	ENSDARG00000087176	sgk494a
black	ENSDARG00000087324	crygm2d1
black	ENSDARG00000087741	asb14b
black	ENSDARG00000087798	pdyn
black	ENSDARG00000087920	nitr10a
black	ENSDARG00000088002	wu:fc23c09
black	ENSDARG00000088167	si:ch211-112g6.4
black	ENSDARG00000088198
black	ENSDARG00000088204	shisa8b
black	ENSDARG00000088601	si:dkey-175m17.6
black	ENSDARG00000088680	hhla2b.1
black	ENSDARG00000088713	si:ch211-226h8.14
black	ENSDARG00000088844	deaf1
black	ENSDARG00000088891	slc23a3
black	ENSDARG00000088906
black	ENSDARG00000088937	si:dkey-259j3.5
black	ENSDARG00000089067	si:dkey-83f18.5
black	ENSDARG00000089235	tspearb
black	ENSDARG00000089255
black	ENSDARG00000089312	si:ch73-106l15.4
black	ENSDARG00000089320	ccdc175
black	ENSDARG00000089331	urahb
black	ENSDARG00000089485	tecrl2a
black	ENSDARG00000089511	si:ch73-78o10.1
black	ENSDARG00000089553	si:dkey-221l4.11
black	ENSDARG00000089627	si:ch211-160d20.5
black	ENSDARG00000089634
black	ENSDARG00000089689	tex26
black	ENSDARG00000089824	lpar4
black	ENSDARG00000089891
black	ENSDARG00000089903
black	ENSDARG00000089959
black	ENSDARG00000090167
black	ENSDARG00000090292	ralyl
black	ENSDARG00000090319	rnf212
black	ENSDARG00000090499	tmem121ab
black	ENSDARG00000090547
black	ENSDARG00000091212	si:dkey-192p21.6
black	ENSDARG00000091576	si:rp71-1d10.5
black	ENSDARG00000091667	si:dkey-234i14.3
black	ENSDARG00000091723	si:ch211-202f3.4
black	ENSDARG00000091841	si:cabz01071909.2
black	ENSDARG00000091877	or137-7
black	ENSDARG00000091901
black	ENSDARG00000091961	pth1b
black	ENSDARG00000091994	znf1048
black	ENSDARG00000092007
black	ENSDARG00000092085
black	ENSDARG00000092094	si:dkey-112g5.11
black	ENSDARG00000092137	si:dkey-4i23.5
black	ENSDARG00000092217
black	ENSDARG00000092247
black	ENSDARG00000092279
black	ENSDARG00000092398
black	ENSDARG00000092404	si:dkey-79p17.3
black	ENSDARG00000092472
black	ENSDARG00000092480	vegfbb
black	ENSDARG00000092512	si:dkey-93l1.6
black	ENSDARG00000092561	pimr201
black	ENSDARG00000092574	si:ch211-198d23.1
black	ENSDARG00000092600	si:dkey-256e7.5
black	ENSDARG00000092615
black	ENSDARG00000092658
black	ENSDARG00000092695
black	ENSDARG00000092705
black	ENSDARG00000092707	or124-1
black	ENSDARG00000092719
black	ENSDARG00000092723	si:ch73-381f5.2
black	ENSDARG00000092778	si:ch73-338o16.4
black	ENSDARG00000092788	si:dkey-21e2.15
black	ENSDARG00000092847
black	ENSDARG00000092855	si:ch211-117n7.8
black	ENSDARG00000092880
black	ENSDARG00000092916	mlnl
black	ENSDARG00000092925
black	ENSDARG00000092963
black	ENSDARG00000093001
black	ENSDARG00000093006	rarres3
black	ENSDARG00000093059	lgals9l6
black	ENSDARG00000093099
black	ENSDARG00000093136
black	ENSDARG00000093180
black	ENSDARG00000093244
black	ENSDARG00000093286
black	ENSDARG00000093289	si:dkey-9i23.14
black	ENSDARG00000093393
black	ENSDARG00000093408	pimr49
black	ENSDARG00000093428
black	ENSDARG00000093473
black	ENSDARG00000093518
black	ENSDARG00000093537
black	ENSDARG00000093560
black	ENSDARG00000093576
black	ENSDARG00000093583
black	ENSDARG00000093594
black	ENSDARG00000093600	omd
black	ENSDARG00000093610
black	ENSDARG00000093672	zgc:171435
black	ENSDARG00000093688
black	ENSDARG00000093732
black	ENSDARG00000093741
black	ENSDARG00000093808	pimr113
black	ENSDARG00000093836	si:dkey-83f18.14
black	ENSDARG00000093875	zgc:174224
black	ENSDARG00000093876	si:dkey-28d5.10
black	ENSDARG00000093878	pimr69
black	ENSDARG00000093901	trhr2
black	ENSDARG00000093960	si:dkey-111e8.5
black	ENSDARG00000093988
black	ENSDARG00000094009
black	ENSDARG00000094038	si:ch211-226f6.1
black	ENSDARG00000094051
black	ENSDARG00000094124
black	ENSDARG00000094186
black	ENSDARG00000094214	si:dkeyp-117b8.4
black	ENSDARG00000094236	si:dkey-112g5.15
black	ENSDARG00000094244
black	ENSDARG00000094254
black	ENSDARG00000094280	usp21
black	ENSDARG00000094291	si:rp71-45g20.11
black	ENSDARG00000094310	si:ch211-255g12.6
black	ENSDARG00000094347
black	ENSDARG00000094447
black	ENSDARG00000094566
black	ENSDARG00000094571
black	ENSDARG00000094586
black	ENSDARG00000094597
black	ENSDARG00000094764	fyba
black	ENSDARG00000094770
black	ENSDARG00000094811	si:dkey-111i23.1
black	ENSDARG00000094821	si:ch73-44m9.2
black	ENSDARG00000094824	si:dkey-23a23.1
black	ENSDARG00000094837
black	ENSDARG00000094840	si:dkey-21e2.13
black	ENSDARG00000094894	tyrobp
black	ENSDARG00000094896	rbm33b
black	ENSDARG00000094899	si:ch1073-143l10.2
black	ENSDARG00000094908	lingo4a
black	ENSDARG00000094927	si:dkey-93l1.4
black	ENSDARG00000094990	si:dkey-91f15.1
black	ENSDARG00000095040	cbln7
black	ENSDARG00000095054	pimr148
black	ENSDARG00000095057	si:dkey-103d23.3
black	ENSDARG00000095080
black	ENSDARG00000095081
black	ENSDARG00000095083	ftr10
black	ENSDARG00000095083	ftr05
black	ENSDARG00000095159
black	ENSDARG00000095179	si:ch211-235f1.3
black	ENSDARG00000095214
black	ENSDARG00000095301
black	ENSDARG00000095394	si:ch1073-75f15.2
black	ENSDARG00000095461	pimr171
black	ENSDARG00000095581
black	ENSDARG00000095649	si:dkey-97a13.12
black	ENSDARG00000095674	tmem123
black	ENSDARG00000095772	si:dkey-11o1.2
black	ENSDARG00000095793	si:dkey-85n7.8
black	ENSDARG00000095883
black	ENSDARG00000095884	si:ch211-57m13.9
black	ENSDARG00000095939	si:ch73-226l13.2
black	ENSDARG00000095965
black	ENSDARG00000096063	si:dkey-191j3.1
black	ENSDARG00000096100
black	ENSDARG00000096135
black	ENSDARG00000096191	si:ch211-112b1.2
black	ENSDARG00000096215
black	ENSDARG00000096239	si:dkey-3d18.5
black	ENSDARG00000096264	or124-4
black	ENSDARG00000096356
black	ENSDARG00000096368	neu3.5
black	ENSDARG00000096382	neu3.1
black	ENSDARG00000096429
black	ENSDARG00000096458	si:dkey-26h11.2
black	ENSDARG00000096463	si:dkeyp-82h4.1
black	ENSDARG00000096502
black	ENSDARG00000096540
black	ENSDARG00000096550
black	ENSDARG00000096574	si:ch211-152f2.4
black	ENSDARG00000096580
black	ENSDARG00000096583
black	ENSDARG00000096584
black	ENSDARG00000096597	si:ch1073-228b5.2
black	ENSDARG00000096620	tube1
black	ENSDARG00000096645	si:ch211-131k2.2
black	ENSDARG00000096649	adgre19
black	ENSDARG00000096688
black	ENSDARG00000096738	si:zfos-911d5.4
black	ENSDARG00000096756	si:ch211-196c10.13
black	ENSDARG00000096773	pimr128
black	ENSDARG00000096784
black	ENSDARG00000096786	si:ch211-28p3.3
black	ENSDARG00000096832
black	ENSDARG00000096833
black	ENSDARG00000096845
black	ENSDARG00000096875
black	ENSDARG00000096889
black	ENSDARG00000096900
black	ENSDARG00000096901	si:dkey-7i4.10
black	ENSDARG00000096915	si:ch211-107e6.6
black	ENSDARG00000096922
black	ENSDARG00000096964
black	ENSDARG00000096967
black	ENSDARG00000096973
black	ENSDARG00000097007
black	ENSDARG00000097022
black	ENSDARG00000097039
black	ENSDARG00000097063	sparcl2
black	ENSDARG00000097071	si:ch211-66i15.4
black	ENSDARG00000097073
black	ENSDARG00000097098	znf1004
black	ENSDARG00000097119
black	ENSDARG00000097130
black	ENSDARG00000097153
black	ENSDARG00000097181	defbl3
black	ENSDARG00000097185
black	ENSDARG00000097212	si:dkey-24p1.6
black	ENSDARG00000097214
black	ENSDARG00000097215	si:dkey-172k15.3
black	ENSDARG00000097229	si:ch211-226h8.15
black	ENSDARG00000097245	soga3a
black	ENSDARG00000097259
black	ENSDARG00000097262
black	ENSDARG00000097279
black	ENSDARG00000097313
black	ENSDARG00000097314	si:zfos-1714f5.3
black	ENSDARG00000097317	si:dkey-276j7.3
black	ENSDARG00000097336
black	ENSDARG00000097352	si:ch211-147g22.7
black	ENSDARG00000097386
black	ENSDARG00000097392
black	ENSDARG00000097416	si:ch73-306e8.2
black	ENSDARG00000097434
black	ENSDARG00000097458	si:dkey-208m12.3
black	ENSDARG00000097468	si:ch73-1f23.1
black	ENSDARG00000097473	zgc:113340
black	ENSDARG00000097481	si:dkey-77f5.11
black	ENSDARG00000097494
black	ENSDARG00000097519
black	ENSDARG00000097524
black	ENSDARG00000097540	pimr62
black	ENSDARG00000097541
black	ENSDARG00000097551	si:dkey-7i4.15
black	ENSDARG00000097552
black	ENSDARG00000097563	si:ch211-151m7.6
black	ENSDARG00000097593
black	ENSDARG00000097624
black	ENSDARG00000097651	tgm8
black	ENSDARG00000097677
black	ENSDARG00000097678
black	ENSDARG00000097701
black	ENSDARG00000097733
black	ENSDARG00000097740	elob
black	ENSDARG00000097748
black	ENSDARG00000097752	si:rp71-77l1.2
black	ENSDARG00000097758
black	ENSDARG00000097762
black	ENSDARG00000097764
black	ENSDARG00000097808	si:dkey-77f5.4
black	ENSDARG00000097810
black	ENSDARG00000097820
black	ENSDARG00000097853
black	ENSDARG00000097868
black	ENSDARG00000097872	si:ch211-137j23.6
black	ENSDARG00000097873
black	ENSDARG00000097916
black	ENSDARG00000097918
black	ENSDARG00000097929
black	ENSDARG00000097938	asb5a
black	ENSDARG00000097947	mespbb
black	ENSDARG00000097956
black	ENSDARG00000098067
black	ENSDARG00000098076	zmp:0000000932
black	ENSDARG00000098095
black	ENSDARG00000098127
black	ENSDARG00000098131
black	ENSDARG00000098133	si:ch211-281k19.2
black	ENSDARG00000098157
black	ENSDARG00000098160
black	ENSDARG00000098178	or109-4
black	ENSDARG00000098199
black	ENSDARG00000098277
black	ENSDARG00000098324	si:cabz01054394.6
black	ENSDARG00000098326
black	ENSDARG00000098353
black	ENSDARG00000098395
black	ENSDARG00000098407
black	ENSDARG00000098410	si:dkey-19b23.10
black	ENSDARG00000098463	gig2g
black	ENSDARG00000098603
black	ENSDARG00000098634
black	ENSDARG00000098636
black	ENSDARG00000098668
black	ENSDARG00000098710
black	ENSDARG00000098739
black	ENSDARG00000098841
black	ENSDARG00000098894
black	ENSDARG00000098912
black	ENSDARG00000098951
black	ENSDARG00000098977
black	ENSDARG00000098988	si:ch211-193i15.1
black	ENSDARG00000098998
black	ENSDARG00000099032
black	ENSDARG00000099057	zgc:112966
black	ENSDARG00000099070
black	ENSDARG00000099075
black	ENSDARG00000099076
black	ENSDARG00000099152	si:dkey-190j3.2
black	ENSDARG00000099215
black	ENSDARG00000099216	atp8b2
black	ENSDARG00000099247	si:dkey-68o6.5
black	ENSDARG00000099284	si:dkey-228b2.6
black	ENSDARG00000099347	si:dkey-220o21.4
black	ENSDARG00000099373	zgc:158320
black	ENSDARG00000099386	lrrtm4l2
black	ENSDARG00000099397	cfap410
black	ENSDARG00000099461	asb10
black	ENSDARG00000099464
black	ENSDARG00000099542
black	ENSDARG00000099586
black	ENSDARG00000099615
black	ENSDARG00000099643	si:ch211-76m11.9
black	ENSDARG00000099693
black	ENSDARG00000099733	si:ch73-167c12.2
black	ENSDARG00000099757	wdr47b
black	ENSDARG00000099859
black	ENSDARG00000099864	si:ch73-170d6.2
black	ENSDARG00000099867	si:ch73-103b2.1
black	ENSDARG00000099875
black	ENSDARG00000099892
black	ENSDARG00000099896
black	ENSDARG00000099910	si:ch211-208f21.3
black	ENSDARG00000099925
black	ENSDARG00000099928	chrm5a
black	ENSDARG00000099938	pigrl3.5
black	ENSDARG00000100021	hrasls
black	ENSDARG00000100039
black	ENSDARG00000100052	cckb
black	ENSDARG00000100087	evx1
black	ENSDARG00000100256	si:dkey-88e18.8
black	ENSDARG00000100284	cd247
black	ENSDARG00000100332
black	ENSDARG00000100401
black	ENSDARG00000100440	fastkd3
black	ENSDARG00000100509	si:dkey-82i20.2
black	ENSDARG00000100519	spop
black	ENSDARG00000100591	sox32
black	ENSDARG00000100593	gnrhr1
black	ENSDARG00000100594	sez6l
black	ENSDARG00000100663	or120-1
black	ENSDARG00000100686	si:ch211-241b2.4
black	ENSDARG00000100707	si:dkey-48g21.7
black	ENSDARG00000100737	epob
black	ENSDARG00000100738	osmr
black	ENSDARG00000100745
black	ENSDARG00000100761
black	ENSDARG00000100780	slco1e1
black	ENSDARG00000100795	timp4.3
black	ENSDARG00000100809	g6fl
black	ENSDARG00000100904
black	ENSDARG00000100915	si:ch211-255f4.7
black	ENSDARG00000100960
black	ENSDARG00000100979
black	ENSDARG00000100987
black	ENSDARG00000101039	zdhhc15a
black	ENSDARG00000101067	si:ch73-194c23.1
black	ENSDARG00000101093	zgc:162971
black	ENSDARG00000101146
black	ENSDARG00000101165	si:dkey-157e10.8
black	ENSDARG00000101166
black	ENSDARG00000101174
black	ENSDARG00000101301	si:dkey-261o4.1
black	ENSDARG00000101318	pcdh2ab9
black	ENSDARG00000101318	pcdh2ac
black	ENSDARG00000101331	tekt1
black	ENSDARG00000101336
black	ENSDARG00000101339
black	ENSDARG00000101360	si:ch211-215e19.6
black	ENSDARG00000101522
black	ENSDARG00000101567	guca1e
black	ENSDARG00000101647
black	ENSDARG00000101727
black	ENSDARG00000101763
black	ENSDARG00000101767	si:dkey-183i3.6
black	ENSDARG00000101776	syt12
black	ENSDARG00000101845
black	ENSDARG00000101906	zgc:113442
black	ENSDARG00000101924	si:dkey-65b13.13
black	ENSDARG00000101925	si:ch1073-204b8.1
black	ENSDARG00000101928	gorasp1b
black	ENSDARG00000101935
black	ENSDARG00000101985	socs9
black	ENSDARG00000101990
black	ENSDARG00000101995	gabrg1
black	ENSDARG00000102009	ppp2r2d
black	ENSDARG00000102085
black	ENSDARG00000102098
black	ENSDARG00000102144	eef1akmt2
black	ENSDARG00000102174
black	ENSDARG00000102219	si:ch211-12p12.2
black	ENSDARG00000102266	isg20l2
black	ENSDARG00000102297
black	ENSDARG00000102299	cxcl8b.1
black	ENSDARG00000102336
black	ENSDARG00000102339	si:dkey-5n7.2
black	ENSDARG00000102450
black	ENSDARG00000102520
black	ENSDARG00000102529	pimr182
black	ENSDARG00000102580
black	ENSDARG00000102611	stmnd1
black	ENSDARG00000102635	znf1037
black	ENSDARG00000102669	or129-1
black	ENSDARG00000102689
black	ENSDARG00000102698
black	ENSDARG00000102710
black	ENSDARG00000102803
black	ENSDARG00000102836
black	ENSDARG00000102848
black	ENSDARG00000102909
black	ENSDARG00000102946	si:ch73-167f10.1
black	ENSDARG00000102968	cnga2a
black	ENSDARG00000103006	si:ch1073-303d10.1
black	ENSDARG00000103050	mrap2b
black	ENSDARG00000103091	si:dkey-19h16.8
black	ENSDARG00000103098	si:ch211-280a23.2
black	ENSDARG00000103139
black	ENSDARG00000103215	pimr169
black	ENSDARG00000103223
black	ENSDARG00000103245
black	ENSDARG00000103248
black	ENSDARG00000103293
black	ENSDARG00000103365	pimr214
black	ENSDARG00000103500
black	ENSDARG00000103507	n4bp2l2
black	ENSDARG00000103509	si:ch73-106n3.2
black	ENSDARG00000103536
black	ENSDARG00000103564	si:dkeyp-30d6.2
black	ENSDARG00000103575	si:dkeyp-104b3.1
black	ENSDARG00000103666	dapk2b
black	ENSDARG00000103765	stpg1
black	ENSDARG00000103852	pigrl4.2
black	ENSDARG00000103927
black	ENSDARG00000103981	bhlha9
black	ENSDARG00000104058	si:dkey-31c13.1
black	ENSDARG00000104186	fbxo43
black	ENSDARG00000104190
black	ENSDARG00000104205	cfhl3
black	ENSDARG00000104211
black	ENSDARG00000104243	eomesb
black	ENSDARG00000104326	si:dkey-183i3.9
black	ENSDARG00000104389	kcnj2b
black	ENSDARG00000104445
black	ENSDARG00000104512
black	ENSDARG00000104543
black	ENSDARG00000104548
black	ENSDARG00000104566	foxi1
black	ENSDARG00000104577
black	ENSDARG00000104597
black	ENSDARG00000104642	si:dkey-31i7.2
black	ENSDARG00000104653	btbd2b
black	ENSDARG00000104662
black	ENSDARG00000104679
black	ENSDARG00000104717	tbxa2r
black	ENSDARG00000104752	si:ch211-93i7.4
black	ENSDARG00000104815	lmx1ba
black	ENSDARG00000104829	zgc:112146
black	ENSDARG00000104932	si:ch211-261d9.1
black	ENSDARG00000104973	wnt5a
black	ENSDARG00000104979
black	ENSDARG00000105034	zdhhc18b
black	ENSDARG00000105037	snrpf
black	ENSDARG00000105055
black	ENSDARG00000105057
black	ENSDARG00000105086
black	ENSDARG00000105099	golga7bb
black	ENSDARG00000105119	si:ch211-258f1.3
black	ENSDARG00000105273
black	ENSDARG00000105282
black	ENSDARG00000105311
black	ENSDARG00000105314	hist1h2a4
black	ENSDARG00000105346	zp2.2
black	ENSDARG00000105461	si:dkey-11o1.6
black	ENSDARG00000105486	si:cabz01040626.2
black	ENSDARG00000105493	si:ch73-223f5.2
black	ENSDARG00000105504
black	ENSDARG00000105524
black	ENSDARG00000105530	si:dkey-19b23.14
black	ENSDARG00000105547
black	ENSDARG00000105607	si:dkey-183c6.9
black	ENSDARG00000105683	si:ch1073-22e3.1
black	ENSDARG00000105694
black	ENSDARG00000105707	or121-1
black	ENSDARG00000105712
black	ENSDARG00000105738
black	ENSDARG00000105740
black	ENSDARG00000105744	ptprr
black	ENSDARG00000105771
blue	ENSDARG00000000086	itsn1
blue	ENSDARG00000000503	stx1b
blue	ENSDARG00000000551	slc1a4
blue	ENSDARG00000000606	dnah6
blue	ENSDARG00000001154	rimbp2
blue	ENSDARG00000001463	tdh2
blue	ENSDARG00000001621	nfyal
blue	ENSDARG00000001634	kirrel1a
blue	ENSDARG00000001686	uckl1a
blue	ENSDARG00000001835	nalcn
blue	ENSDARG00000001889	tuba1a
blue	ENSDARG00000001975	hsd11b2
blue	ENSDARG00000002167	cacnb1
blue	ENSDARG00000002184	igbp1
blue	ENSDARG00000002235	mmp14a
blue	ENSDARG00000002255	epb41l3a
blue	ENSDARG00000002271	zfand5b
blue	ENSDARG00000002300	p2rx2
blue	ENSDARG00000002330	lhx8a
blue	ENSDARG00000002494	itgb6
blue	ENSDARG00000002587	dpysl3
blue	ENSDARG00000002600	pcsk1
blue	ENSDARG00000002644	rgs5a
blue	ENSDARG00000002701	rasl12
blue	ENSDARG00000002732	spon2b
blue	ENSDARG00000002750	phf20a
blue	ENSDARG00000002760	gdf5
blue	ENSDARG00000002771	si:ch211-48m9.1
blue	ENSDARG00000002840	si:dkey-28b4.8
blue	ENSDARG00000002847	fndc1
blue	ENSDARG00000002912	adipor1a
blue	ENSDARG00000002994	itpkca
blue	ENSDARG00000003020	lrrc4.2
blue	ENSDARG00000003084	spire2
blue	ENSDARG00000003085	stambpl1
blue	ENSDARG00000003210	si:ch73-86n2.1
blue	ENSDARG00000003290	dab1b
blue	ENSDARG00000003293	sox9a
blue	ENSDARG00000003311	pank2
blue	ENSDARG00000003382	cwc25
blue	ENSDARG00000003420	chrna5
blue	ENSDARG00000003469	neurod4
blue	ENSDARG00000003495	madd
blue	ENSDARG00000003544	adarb1b
blue	ENSDARG00000003631	clockb
blue	ENSDARG00000003803
blue	ENSDARG00000003877	pbrm1
blue	ENSDARG00000003998	phyhipla
blue	ENSDARG00000004023	isl1
blue	ENSDARG00000004037	cog2
blue	ENSDARG00000004074	bach2b
blue	ENSDARG00000004078	acsl4a
blue	ENSDARG00000004187	zgc:122979
blue	ENSDARG00000004211	ccdc106a
blue	ENSDARG00000004227	pde3a
blue	ENSDARG00000004260	cul5b
blue	ENSDARG00000004291	hecw1b
blue	ENSDARG00000004297	irf2bpl
blue	ENSDARG00000004302	slc45a1
blue	ENSDARG00000004305	vangl1
blue	ENSDARG00000004358	gnb3a
blue	ENSDARG00000004386	si:dkey-153k10.9
blue	ENSDARG00000004402	elovl6
blue	ENSDARG00000004415	tcf7l2
blue	ENSDARG00000004447	aplnr2
blue	ENSDARG00000004473	tbx21
blue	ENSDARG00000004492	pcyt1ab
blue	ENSDARG00000004529	zgc:173742
blue	ENSDARG00000004588	sox4a
blue	ENSDARG00000004597	lrrc4ba
blue	ENSDARG00000004648	kctd16a
blue	ENSDARG00000004712	tbr1b
blue	ENSDARG00000004789	lrp1ba
blue	ENSDARG00000004836	dnajc5ab
blue	ENSDARG00000004861	esrrga
blue	ENSDARG00000004869	penka
blue	ENSDARG00000004931	slc8a3
blue	ENSDARG00000004988	ppp3ca
blue	ENSDARG00000005095	glcea
blue	ENSDARG00000005141	camkvb
blue	ENSDARG00000005271	zc3h12a
blue	ENSDARG00000005364	grin3ba
blue	ENSDARG00000005372	camk4
blue	ENSDARG00000005453	foxp2
blue	ENSDARG00000005476	nav3
blue	ENSDARG00000005482	rapgef2
blue	ENSDARG00000005549	znf710b
blue	ENSDARG00000005559	pou4f1
blue	ENSDARG00000005560	ywhah
blue	ENSDARG00000005586	zbtb20
blue	ENSDARG00000005651	hrasb
blue	ENSDARG00000005739	gpm6ba
blue	ENSDARG00000005775	scn8aa
blue	ENSDARG00000005783	ncanb
blue	ENSDARG00000005800	ampd3a
blue	ENSDARG00000005834	gatad2b
blue	ENSDARG00000005853	slc25a6
blue	ENSDARG00000005916	srpk3
blue	ENSDARG00000005945	sart1
blue	ENSDARG00000006065	znf385b
blue	ENSDARG00000006128	cep170aa
blue	ENSDARG00000006151	pde11al
blue	ENSDARG00000006181	hif1aa
blue	ENSDARG00000006206	pou4f3
blue	ENSDARG00000006257	vldlr
blue	ENSDARG00000006288	prdm5
blue	ENSDARG00000006356	slc18a3a
blue	ENSDARG00000006383	stxbp5l
blue	ENSDARG00000006396	nrcama
blue	ENSDARG00000006456	pdgfrl
blue	ENSDARG00000006497	rtn1a
blue	ENSDARG00000006607	gpr27
blue	ENSDARG00000006640	eomesa
blue	ENSDARG00000006747	tmem178b
blue	ENSDARG00000006791	arntl1a
blue	ENSDARG00000006832	galnt9
blue	ENSDARG00000006862	kifap3b
blue	ENSDARG00000006865	glra4a
blue	ENSDARG00000006896	lhx6
blue	ENSDARG00000006901	si:ch1073-459j12.1
blue	ENSDARG00000006944	gdpd3b
blue	ENSDARG00000007136	gtf2h4
blue	ENSDARG00000007149	l1cama
blue	ENSDARG00000007151	kcnk2b
blue	ENSDARG00000007171	aig1
blue	ENSDARG00000007207	cnpy2
blue	ENSDARG00000007245	rundc3aa
blue	ENSDARG00000007247	ric8a
blue	ENSDARG00000007396	rnd3b
blue	ENSDARG00000007406	phox2a
blue	ENSDARG00000007553	opn4.1
blue	ENSDARG00000007560	sema3bl
blue	ENSDARG00000007561	cdh23
blue	ENSDARG00000007576	crybb1l1
blue	ENSDARG00000007601	zmynd8
blue	ENSDARG00000007654	nsfa
blue	ENSDARG00000007663	amph
blue	ENSDARG00000007697	fabp7a
blue	ENSDARG00000007743	il15l
blue	ENSDARG00000007753	cpne2
blue	ENSDARG00000007764	klhdc10
blue	ENSDARG00000007786	tmx2b
blue	ENSDARG00000007807	cyth3a
blue	ENSDARG00000007808	zdhhc16a
blue	ENSDARG00000007824	camta1b
blue	ENSDARG00000007825	map2k1
blue	ENSDARG00000007869	ehd3
blue	ENSDARG00000007941	hmx4
blue	ENSDARG00000007944	lhx1b
blue	ENSDARG00000007950	itga11b
blue	ENSDARG00000008060	scara3
blue	ENSDARG00000008191	tmeff1a
blue	ENSDARG00000008209	myt1la
blue	ENSDARG00000008249	ptchd4
blue	ENSDARG00000008329	asic1a
blue	ENSDARG00000008434	bcl2l1
blue	ENSDARG00000008553	zgc:136872
blue	ENSDARG00000008660	coro1b
blue	ENSDARG00000008720	lmo3
blue	ENSDARG00000008723	prkcba
blue	ENSDARG00000008732	zgc:66479
blue	ENSDARG00000008788	camk1gb
blue	ENSDARG00000008829	chga
blue	ENSDARG00000009014	col11a1b
blue	ENSDARG00000009026	ank2a
blue	ENSDARG00000009215	zgc:112437
blue	ENSDARG00000009262	si:dkey-97m3.1
blue	ENSDARG00000009281	dnm1b
blue	ENSDARG00000009299	dusp8a
blue	ENSDARG00000009386	si:ch211-222n4.6
blue	ENSDARG00000009480	pdcl
blue	ENSDARG00000009499	syne1a
blue	ENSDARG00000009525	tial1
blue	ENSDARG00000009553	gng3
blue	ENSDARG00000009567	spegb
blue	ENSDARG00000009568	ca10b
blue	ENSDARG00000009745	fbxw2
blue	ENSDARG00000009771	ppme1
blue	ENSDARG00000009796	klc1a
blue	ENSDARG00000009825	mmp23bb
blue	ENSDARG00000009870	mapk8b
blue	ENSDARG00000009922	dmbx1a
blue	ENSDARG00000009930	cadm2a
blue	ENSDARG00000009941	erc1a
blue	ENSDARG00000009961	rundc3b
blue	ENSDARG00000010002	gna11a
blue	ENSDARG00000010029	spon1a
blue	ENSDARG00000010031	ssh1b
blue	ENSDARG00000010042	dnm1a
blue	ENSDARG00000010075
blue	ENSDARG00000010083	rbfox3a
blue	ENSDARG00000010096	slc1a6
blue	ENSDARG00000010098	pank1b
blue	ENSDARG00000010108	bri3bp
blue	ENSDARG00000010186	myo3a
blue	ENSDARG00000010248	wdr54
blue	ENSDARG00000010385	sept4a
blue	ENSDARG00000010407	ppp4r4
blue	ENSDARG00000010425	scara5
blue	ENSDARG00000010514	cxcr5
blue	ENSDARG00000010565	aqp4
blue	ENSDARG00000010586	tex9
blue	ENSDARG00000010630	hoxb6a
blue	ENSDARG00000010728	scin
blue	ENSDARG00000010785	thbs1b
blue	ENSDARG00000010816	slc7a14a
blue	ENSDARG00000010953	ndel1a
blue	ENSDARG00000010957	mpp2b
blue	ENSDARG00000010958	glmnb
blue	ENSDARG00000011042	pgbd5
blue	ENSDARG00000011055	fbxo9
blue	ENSDARG00000011066	glra3
blue	ENSDARG00000011171	si:ch211-12m10.1
blue	ENSDARG00000011235	otx2b
blue	ENSDARG00000011240	ift46
blue	ENSDARG00000011370	fyna
blue	ENSDARG00000011407	col2a1b
blue	ENSDARG00000011602	si:dkeyp-117h8.2
blue	ENSDARG00000011703	clocka
blue	ENSDARG00000011821	plod2
blue	ENSDARG00000011862	inaa
blue	ENSDARG00000011941	bmpr2a
blue	ENSDARG00000011956	dlx4a
blue	ENSDARG00000011989	crx
blue	ENSDARG00000011998	bfsp2
blue	ENSDARG00000012016	hpgd
blue	ENSDARG00000012019	glra1
blue	ENSDARG00000012126	zgc:109965
blue	ENSDARG00000012297	cnga3b
blue	ENSDARG00000012347	nacad
blue	ENSDARG00000012390	kcnk5b
blue	ENSDARG00000012397	eya4
blue	ENSDARG00000012405	col1a1a
blue	ENSDARG00000012460	rassf4
blue	ENSDARG00000012534	slc6a6a
blue	ENSDARG00000012555	ak5
blue	ENSDARG00000012667	tfap2b
blue	ENSDARG00000012671	inhbaa
blue	ENSDARG00000012763	arl13b
blue	ENSDARG00000012801	pfkpb
blue	ENSDARG00000012823	dlgap4b
blue	ENSDARG00000012833	foxn3
blue	ENSDARG00000012840	alg9
blue	ENSDARG00000012866	picalma
blue	ENSDARG00000012896	anos1a
blue	ENSDARG00000012927	tcea2
blue	ENSDARG00000012945	tnfsf13b
blue	ENSDARG00000013009	ubiad1
blue	ENSDARG00000013020	dtnbb
blue	ENSDARG00000013117	hiat1a
blue	ENSDARG00000013224	phc2b
blue	ENSDARG00000013293	crispld1b
blue	ENSDARG00000013360	sh3gl3a
blue	ENSDARG00000013414	lin7a
blue	ENSDARG00000013453	tdrd9
blue	ENSDARG00000013460	wfikkn2a
blue	ENSDARG00000013491	map3k9
blue	ENSDARG00000013526	svep1
blue	ENSDARG00000013615	pbx3b
blue	ENSDARG00000013741	lancl1
blue	ENSDARG00000013813	fam219ab
blue	ENSDARG00000013838	sulf2b
blue	ENSDARG00000014005	lrrc45
blue	ENSDARG00000014053	olfm1b
blue	ENSDARG00000014081	fam184a
blue	ENSDARG00000014098	pkd2
blue	ENSDARG00000014169
blue	ENSDARG00000014201	otpa
blue	ENSDARG00000014215	cdh13
blue	ENSDARG00000014273	camk2d2
blue	ENSDARG00000014280	dlgap1a
blue	ENSDARG00000014287	eno2
blue	ENSDARG00000014302	brinp2
blue	ENSDARG00000014321	en1a
blue	ENSDARG00000014357	amh
blue	ENSDARG00000014479	ptf1a
blue	ENSDARG00000014670	colgalt2
blue	ENSDARG00000014675	efna3a
blue	ENSDARG00000014746	rbfox1
blue	ENSDARG00000014790	g3bp2
blue	ENSDARG00000014792	lrrc4bb
blue	ENSDARG00000014825	si:dkeyp-69b9.6
blue	ENSDARG00000014871	syngr3a
blue	ENSDARG00000014910	panx1b
blue	ENSDARG00000014953	cnih3
blue	ENSDARG00000014962	ppp3cca
blue	ENSDARG00000014966	ccdc82
blue	ENSDARG00000014973	ntng1a
blue	ENSDARG00000015002	cdh4
blue	ENSDARG00000015010	ccdc114
blue	ENSDARG00000015025	l1camb
blue	ENSDARG00000015053	grip1
blue	ENSDARG00000015057	ube2d4
blue	ENSDARG00000015174	atp6v0a1b
blue	ENSDARG00000015184	mpp3a
blue	ENSDARG00000015221	nsrp1
blue	ENSDARG00000015266	mab21l2
blue	ENSDARG00000015273	alpi.1
blue	ENSDARG00000015312	klf12a
blue	ENSDARG00000015314	zc4h2
blue	ENSDARG00000015474	ppp2r5ea
blue	ENSDARG00000015482	zgc:113518
blue	ENSDARG00000015502	adam10b
blue	ENSDARG00000015531	slc4a8
blue	ENSDARG00000015536	sox6
blue	ENSDARG00000015566	dnmt3ab
blue	ENSDARG00000015611	rasl11b
blue	ENSDARG00000015793	creb3l1
blue	ENSDARG00000015854	chata
blue	ENSDARG00000015931	si:ch211-214j24.9
blue	ENSDARG00000015947	matn4
blue	ENSDARG00000015966	yaf2
blue	ENSDARG00000016038	hacd3
blue	ENSDARG00000016141	slc6a2
blue	ENSDARG00000016301	zgc:65894
blue	ENSDARG00000016348	dip2bb
blue	ENSDARG00000016460	fut9a
blue	ENSDARG00000016480	slc17a7a
blue	ENSDARG00000016483	baiap2l2a
blue	ENSDARG00000016598	ckmt1
blue	ENSDARG00000016667	gabbr1b
blue	ENSDARG00000016724	zgc:162339
blue	ENSDARG00000016793	crybb1l2
blue	ENSDARG00000016854	neurod2
blue	ENSDARG00000016977	snx27b
blue	ENSDARG00000017007	nr4a2a
blue	ENSDARG00000017047	slc27a4
blue	ENSDARG00000017141	pla2g4ab
blue	ENSDARG00000017162	kif3ca
blue	ENSDARG00000017195	foxf2a
blue	ENSDARG00000017254	kcnk1b
blue	ENSDARG00000017266	scml4
blue	ENSDARG00000017338	kidins220b
blue	ENSDARG00000017366	prdm4
blue	ENSDARG00000017369	sema3d
blue	ENSDARG00000017386	sobpb
blue	ENSDARG00000017425	crocc2
blue	ENSDARG00000017429	sphkap
blue	ENSDARG00000017431	mindy2
blue	ENSDARG00000017466	ncam2
blue	ENSDARG00000017602	ccng2
blue	ENSDARG00000017681	mapk4
blue	ENSDARG00000017739	ak5l
blue	ENSDARG00000017843	srsf1b
blue	ENSDARG00000018040	msantd4
blue	ENSDARG00000018065	ntm
blue	ENSDARG00000018066	ptchd1
blue	ENSDARG00000018109	mafga
blue	ENSDARG00000018228	htr2cl1
blue	ENSDARG00000018259	atp1a3a
blue	ENSDARG00000018270	olfm1a
blue	ENSDARG00000018397	hpca
blue	ENSDARG00000018691	phf2
blue	ENSDARG00000018743	scamp5a
blue	ENSDARG00000018765	pknox1.1
blue	ENSDARG00000018809	abhd3
blue	ENSDARG00000018817	bdnf
blue	ENSDARG00000018896	mmp24
blue	ENSDARG00000018921	fam84a
blue	ENSDARG00000018967	gabbr1a
blue	ENSDARG00000018997	cplx2l
blue	ENSDARG00000019001	ak7a
blue	ENSDARG00000019013	barhl1b
blue	ENSDARG00000019103	kdm4ab
blue	ENSDARG00000019185	slain1a
blue	ENSDARG00000019208	camsap1a
blue	ENSDARG00000019213	zgc:136929
blue	ENSDARG00000019223	arglu1a
blue	ENSDARG00000019233	nln
blue	ENSDARG00000019304	phactr3b
blue	ENSDARG00000019341	gpc1a
blue	ENSDARG00000019342	chrnd
blue	ENSDARG00000019353	sparc
blue	ENSDARG00000019426	trioa
blue	ENSDARG00000019451	pcsk2
blue	ENSDARG00000019525	tbcelb
blue	ENSDARG00000019566	neurod1
blue	ENSDARG00000019658	pou2f2a
blue	ENSDARG00000019753	kcnn3
blue	ENSDARG00000019782	impg2a
blue	ENSDARG00000019856	atp1a1b
blue	ENSDARG00000019945	ptprdb
blue	ENSDARG00000019962	dop1a
blue	ENSDARG00000020007	col1a2
blue	ENSDARG00000020031	cldn11a
blue	ENSDARG00000020057	bmpr2b
blue	ENSDARG00000020072	thbs4b
blue	ENSDARG00000020107	usp2a
blue	ENSDARG00000020212	slc1a1
blue	ENSDARG00000020231	mapre3a
blue	ENSDARG00000020279	efcab7
blue	ENSDARG00000020284	si:ch211-278j3.3
blue	ENSDARG00000020443	xkr6a
blue	ENSDARG00000020450	cacng8a
blue	ENSDARG00000020475	znrf1
blue	ENSDARG00000020541	ism1
blue	ENSDARG00000020544	rem1
blue	ENSDARG00000020609	snap25a
blue	ENSDARG00000020655
blue	ENSDARG00000020708	mdkb
blue	ENSDARG00000020771	tnr
blue	ENSDARG00000020777	cep85l
blue	ENSDARG00000020794	neurod6b
blue	ENSDARG00000020798	necap1
blue	ENSDARG00000020814	faimb
blue	ENSDARG00000020857	ccdc149b
blue	ENSDARG00000020871	ptprz1b
blue	ENSDARG00000020957	pth1ra
blue	ENSDARG00000020982	prickle2a
blue	ENSDARG00000021022	ift57
blue	ENSDARG00000021113	ptmaa
blue	ENSDARG00000021150	valopa
blue	ENSDARG00000021151	ptpreb
blue	ENSDARG00000021163	thrb
blue	ENSDARG00000021305	slc30a2
blue	ENSDARG00000021352	gria1a
blue	ENSDARG00000021480	olfml2bb
blue	ENSDARG00000021556	ubl3b
blue	ENSDARG00000021584	cntn5
blue	ENSDARG00000021595	lhfpl3
blue	ENSDARG00000021607	negr1
blue	ENSDARG00000021735	cacna1ba
blue	ENSDARG00000021869	rcan2
blue	ENSDARG00000021959	zgc:101100
blue	ENSDARG00000021979	mical3a
blue	ENSDARG00000022045	map1ab
blue	ENSDARG00000022176	zgc:110372
blue	ENSDARG00000022378	mtmr1b
blue	ENSDARG00000022518	pex5la
blue	ENSDARG00000022531	ntn1b
blue	ENSDARG00000022569	nkx6.1
blue	ENSDARG00000022763	hpcal1
blue	ENSDARG00000022768	gid8a
blue	ENSDARG00000022891	zgc:175214
blue	ENSDARG00000022905	znf1163
blue	ENSDARG00000023110	mapk7
blue	ENSDARG00000023174	fez1
blue	ENSDARG00000023228	vsnl1a
blue	ENSDARG00000023267	atad1a
blue	ENSDARG00000023443	tjp2b
blue	ENSDARG00000023445	atp2b3b
blue	ENSDARG00000023448	galnt14
blue	ENSDARG00000023508	ankrd49
blue	ENSDARG00000023537	ahr1b
blue	ENSDARG00000023591	nrbf2b
blue	ENSDARG00000023600	sh3gl2a
blue	ENSDARG00000023683	cacna1fb
blue	ENSDARG00000023886	cacna2d4b
blue	ENSDARG00000023903	atf2
blue	ENSDARG00000023914	mark4a
blue	ENSDARG00000023916	phactr1
blue	ENSDARG00000023940	si:ch73-362m14.4
blue	ENSDARG00000024017	mdga2a
blue	ENSDARG00000024141	cav3
blue	ENSDARG00000024299	c1qtnf4
blue	ENSDARG00000024537	emilin1a
blue	ENSDARG00000024744	dpp6b
blue	ENSDARG00000024759	inhbab
blue	ENSDARG00000024785	ctnna2
blue	ENSDARG00000024829	tnn
blue	ENSDARG00000024847	col5a2b
blue	ENSDARG00000024865	dscama
blue	ENSDARG00000024954	tmed4
blue	ENSDARG00000025034	syngr3b
blue	ENSDARG00000025106	ppp3cb
blue	ENSDARG00000025206	syt2a
blue	ENSDARG00000025299	tspan9a
blue	ENSDARG00000025309	dpf3
blue	ENSDARG00000025320	col21a1
blue	ENSDARG00000025325	ccsapa
blue	ENSDARG00000025340	tusc2b
blue	ENSDARG00000025465	spon2a
blue	ENSDARG00000025495	nhlh2
blue	ENSDARG00000025513	dip2cb
blue	ENSDARG00000025615	prr15la
blue	ENSDARG00000025671	grm6b
blue	ENSDARG00000025728	grin1b
blue	ENSDARG00000025847	sox12
blue	ENSDARG00000025855	camk2n1a
blue	ENSDARG00000025891	shox
blue	ENSDARG00000025974	magi3b
blue	ENSDARG00000026185	yju2
blue	ENSDARG00000026198	enoph1
blue	ENSDARG00000026247	insyn1
blue	ENSDARG00000026325	mmp11a
blue	ENSDARG00000026499	ppm1e
blue	ENSDARG00000026759	ldlrb
blue	ENSDARG00000026796	grm1a
blue	ENSDARG00000026840	arhgap23b
blue	ENSDARG00000026855	cacna2d4a
blue	ENSDARG00000027041	pcdh17
blue	ENSDARG00000027065	slc38a3a
blue	ENSDARG00000027079	znf804a
blue	ENSDARG00000027087	tgfb2
blue	ENSDARG00000027153	gabrr3a
blue	ENSDARG00000027169	kpna7
blue	ENSDARG00000027187	kat8
blue	ENSDARG00000027196	si:dkey-16l2.17
blue	ENSDARG00000027234	ift88
blue	ENSDARG00000027316	tcp11l2
blue	ENSDARG00000027419	gad1b
blue	ENSDARG00000027495	elovl4b
blue	ENSDARG00000027497	mast1a
blue	ENSDARG00000027501	usp20
blue	ENSDARG00000027564	pak6a
blue	ENSDARG00000027740	adcyap1b
blue	ENSDARG00000027828	grin1a
blue	ENSDARG00000027867	paplna
blue	ENSDARG00000027903	adamtsl3
blue	ENSDARG00000027933	glis1b
blue	ENSDARG00000027963	camkva
blue	ENSDARG00000028017	tp53inp1
blue	ENSDARG00000028066	diras1a
blue	ENSDARG00000028071	bmp1a
blue	ENSDARG00000028118	dscamb
blue	ENSDARG00000028192	cradd
blue	ENSDARG00000028306	prph
blue	ENSDARG00000028354	stxbp6l
blue	ENSDARG00000028396	fkbp5
blue	ENSDARG00000028469	rps6ka2
blue	ENSDARG00000028478	si:ch211-173n18.3
blue	ENSDARG00000028552	plppr3b
blue	ENSDARG00000028586	gpr135
blue	ENSDARG00000028628	gdap1l1
blue	ENSDARG00000028725	adra1aa
blue	ENSDARG00000028845	calcr
blue	ENSDARG00000028857	sgsm1a
blue	ENSDARG00000029018	cdkn1ba
blue	ENSDARG00000029112	gem
blue	ENSDARG00000029114	si:dkey-40m6.8
blue	ENSDARG00000029124	adamts15a
blue	ENSDARG00000029177	lnx2a
blue	ENSDARG00000029219	avpr2ab
blue	ENSDARG00000029239	syt9b
blue	ENSDARG00000029331	atxn7l3
blue	ENSDARG00000029482	ush2a
blue	ENSDARG00000029546	grem1a
blue	ENSDARG00000029689	tkta
blue	ENSDARG00000029692	rufy3
blue	ENSDARG00000029866	slc6a14
blue	ENSDARG00000029885	rab41
blue	ENSDARG00000029952	ampd2b
blue	ENSDARG00000030107	si:ch211-207i1.2
blue	ENSDARG00000030154	pak7
blue	ENSDARG00000030157	mybpc2a
blue	ENSDARG00000030448	sppl2
blue	ENSDARG00000030598	nampta
blue	ENSDARG00000030614	syt1a
blue	ENSDARG00000030632	ccdc3b
blue	ENSDARG00000030656	sept3
blue	ENSDARG00000030687	phka2
blue	ENSDARG00000030716	ing4
blue	ENSDARG00000030733	b3gat2
blue	ENSDARG00000030750	gabrr3b
blue	ENSDARG00000030975	ccdc80l1
blue	ENSDARG00000031049	igsf21a
blue	ENSDARG00000031240	kidins220a
blue	ENSDARG00000031283	vamp1
blue	ENSDARG00000031316	six6b
blue	ENSDARG00000031343	rab6bb
blue	ENSDARG00000031346	rbm17
blue	ENSDARG00000031387	cers4a
blue	ENSDARG00000031463	syt6b
blue	ENSDARG00000031483	col9a1b
blue	ENSDARG00000031562	tada2a
blue	ENSDARG00000031587	flvcr1
blue	ENSDARG00000031720	clstn1
blue	ENSDARG00000031737	pthlha
blue	ENSDARG00000031768	roraa
blue	ENSDARG00000031783	adcy8
blue	ENSDARG00000031796	ache
blue	ENSDARG00000031894	lef1
blue	ENSDARG00000032039	mxd1
blue	ENSDARG00000032056	arl6
blue	ENSDARG00000032072	cdk16
blue	ENSDARG00000032126	scg5
blue	ENSDARG00000032155	ppm1aa
blue	ENSDARG00000032246	tmtopsb
blue	ENSDARG00000032344	pde4a
blue	ENSDARG00000032369	btbd6b
blue	ENSDARG00000032458	mark2b
blue	ENSDARG00000032614	msi2b
blue	ENSDARG00000032623	rcan3
blue	ENSDARG00000032651	ppp1r10
blue	ENSDARG00000032714	gria1b
blue	ENSDARG00000032737	gria3a
blue	ENSDARG00000032795	tmem8a
blue	ENSDARG00000032838	si:dkey-206f10.1
blue	ENSDARG00000032865	pacsin1a
blue	ENSDARG00000032868	pde4ba
blue	ENSDARG00000032929	cryba1l1
blue	ENSDARG00000033447	nxph1
blue	ENSDARG00000033498	rorb
blue	ENSDARG00000033516	efr3ba
blue	ENSDARG00000033537	p4ha1a
blue	ENSDARG00000033599	zgc:100906
blue	ENSDARG00000033635
blue	ENSDARG00000033655	stmn1b
blue	ENSDARG00000033901	msi2a
blue	ENSDARG00000033916	si:ch211-243j20.2
blue	ENSDARG00000034011
blue	ENSDARG00000034076	lrp11
blue	ENSDARG00000034086	zgc:65895
blue	ENSDARG00000034168	serpini1
blue	ENSDARG00000034187	calm3a
blue	ENSDARG00000034187	calm1b
blue	ENSDARG00000034215	rab42a
blue	ENSDARG00000034300	sema3c
blue	ENSDARG00000034420	irx6a
blue	ENSDARG00000034493	grin2aa
blue	ENSDARG00000034616	mlf2
blue	ENSDARG00000034668	celf3a
blue	ENSDARG00000034871	mid2
blue	ENSDARG00000034883	acbd5a
blue	ENSDARG00000034907	paqr7b
blue	ENSDARG00000034988	asb4
blue	ENSDARG00000035056	fgf13a
blue	ENSDARG00000035127	rxrab
blue	ENSDARG00000035131	surf4l
blue	ENSDARG00000035188	rab14l
blue	ENSDARG00000035273	tmtc2b
blue	ENSDARG00000035352	pafah1b2
blue	ENSDARG00000035422	cyr61l1
blue	ENSDARG00000035471	si:dkey-220k22.1
blue	ENSDARG00000035508	barhl1a
blue	ENSDARG00000035515	tm2d2
blue	ENSDARG00000035538	atp6v0a2a
blue	ENSDARG00000035578	hs3st1l2
blue	ENSDARG00000035579	si:dkey-174n20.1
blue	ENSDARG00000035648	irx4a
blue	ENSDARG00000035649	ext1c
blue	ENSDARG00000035695	scxa
blue	ENSDARG00000035765
blue	ENSDARG00000035809	col1a1b
blue	ENSDARG00000035837	mosmob
blue	ENSDARG00000035859	angptl4
blue	ENSDARG00000035870	laptm4b
blue	ENSDARG00000035883	nt5c1aa
blue	ENSDARG00000035899	lingo1b
blue	ENSDARG00000035952	cdr2a
blue	ENSDARG00000035984	mnx1
blue	ENSDARG00000036008	caly
blue	ENSDARG00000036086	itga11a
blue	ENSDARG00000036155	gla
blue	ENSDARG00000036156	fnbp1a
blue	ENSDARG00000036168	nfatc1
blue	ENSDARG00000036179	myo1ea
blue	ENSDARG00000036194	pitx2
blue	ENSDARG00000036272	gcgrb
blue	ENSDARG00000036295	golga7ba
blue	ENSDARG00000036383	si:ch73-335m24.5
blue	ENSDARG00000036424
blue	ENSDARG00000036446	si:ch211-272n13.7
blue	ENSDARG00000036493	si:ch73-174h16.4
blue	ENSDARG00000036577	atp6v0cb
blue	ENSDARG00000036809	si:ch211-106j24.1
blue	ENSDARG00000036816	pou2f2a
blue	ENSDARG00000036846	anks4b
blue	ENSDARG00000036863	si:ch211-94l19.4
blue	ENSDARG00000036897	sgms2b
blue	ENSDARG00000036952	zgc:198371
blue	ENSDARG00000036998	arf3b
blue	ENSDARG00000036999	si:dkey-32e23.6
blue	ENSDARG00000037042	ddhd1b
blue	ENSDARG00000037059	slc44a2
blue	ENSDARG00000037062	dhh
blue	ENSDARG00000037069	zdhhc14
blue	ENSDARG00000037101	mtmr7a
blue	ENSDARG00000037154	hivep3b
blue	ENSDARG00000037196	arid5b
blue	ENSDARG00000037284	ptges3a
blue	ENSDARG00000037324	klhl17
blue	ENSDARG00000037337	cnrip1b
blue	ENSDARG00000037373	ephb2a
blue	ENSDARG00000037415	dlgap1b
blue	ENSDARG00000037433	fmr1
blue	ENSDARG00000037498	gria3b
blue	ENSDARG00000037507	kctd12b
blue	ENSDARG00000037588	bhlhe23
blue	ENSDARG00000037603	zgc:162144
blue	ENSDARG00000037677	fgf24
blue	ENSDARG00000037695	pcdh2aa1
blue	ENSDARG00000037747	fscn1b
blue	ENSDARG00000037773	rybpa
blue	ENSDARG00000037905	cacna1aa
blue	ENSDARG00000037916	cdk5r1a
blue	ENSDARG00000037921	gng13b
blue	ENSDARG00000037932	lin7b
blue	ENSDARG00000037961	rcn3
blue	ENSDARG00000038052	si:ch211-149k23.9
blue	ENSDARG00000038235	pkdccb
blue	ENSDARG00000038237	tbc1d12a
blue	ENSDARG00000038302	ccar2
blue	ENSDARG00000038306	tsc22d1
blue	ENSDARG00000038445	spire1b
blue	ENSDARG00000038574	scg2b
blue	ENSDARG00000038655	ajap1
blue	ENSDARG00000038731	slc25a36a
blue	ENSDARG00000038786	smarcd3a
blue	ENSDARG00000038789	tmem53
blue	ENSDARG00000038855	chmp5a
blue	ENSDARG00000038862	kcnb2
blue	ENSDARG00000038894	tmx3a
blue	ENSDARG00000038954	ctnnbip1
blue	ENSDARG00000038981	zgc:153615
blue	ENSDARG00000039052	klhl40a
blue	ENSDARG00000039181	trpm3
blue	ENSDARG00000039256	spega
blue	ENSDARG00000039266	rbm25a
blue	ENSDARG00000039335	st6gal2a
blue	ENSDARG00000039385	dlg4b
blue	ENSDARG00000039456	acbd6
blue	ENSDARG00000039458	lhx4
blue	ENSDARG00000039482	calhm2
blue	ENSDARG00000039483	si:dkey-51a16.9
blue	ENSDARG00000039500	zmp:0000001073
blue	ENSDARG00000039521	ssx2ipa
blue	ENSDARG00000039576	fstl1b
blue	ENSDARG00000039647	slc6a1b
blue	ENSDARG00000039650	itm2cb
blue	ENSDARG00000039661	slc36a4
blue	ENSDARG00000039730	zgc:112160
blue	ENSDARG00000039827	bbs5
blue	ENSDARG00000039901	sh3gl2b
blue	ENSDARG00000039935
blue	ENSDARG00000039951	si:ch211-87j1.4
blue	ENSDARG00000039960	st7
blue	ENSDARG00000040008	neurod6a
blue	ENSDARG00000040059	gbp
blue	ENSDARG00000040123	zfpm2a
blue	ENSDARG00000040133	ackr4b
blue	ENSDARG00000040159	wnt4b
blue	ENSDARG00000040161	zgc:92287
blue	ENSDARG00000040162	zgc:165461
blue	ENSDARG00000040214	scrt1b
blue	ENSDARG00000040277	fbxo32
blue	ENSDARG00000040291	cadm4
blue	ENSDARG00000040358	spred3
blue	ENSDARG00000040430	nptxra
blue	ENSDARG00000040432	klf2b
blue	ENSDARG00000040469	enpp6
blue	ENSDARG00000040547	b3gat1a
blue	ENSDARG00000040606	tfap2c
blue	ENSDARG00000040614	sestd1
blue	ENSDARG00000040627	grik1b
blue	ENSDARG00000040635	rnf11b
blue	ENSDARG00000040700	nab1b
blue	ENSDARG00000040864	si:dkey-286j15.1
blue	ENSDARG00000040884	mxi1
blue	ENSDARG00000040898	gpa33b
blue	ENSDARG00000040911	meox2a
blue	ENSDARG00000040966	zgc:113149
blue	ENSDARG00000040985	itgbl1
blue	ENSDARG00000040991	cttnbp2
blue	ENSDARG00000041071	jagn1a
blue	ENSDARG00000041133	rapsn
blue	ENSDARG00000041150	slc17a6b
blue	ENSDARG00000041237	med18
blue	ENSDARG00000041323	csdc2a
blue	ENSDARG00000041492	si:ch211-196f5.2
blue	ENSDARG00000041609	adarb1a
blue	ENSDARG00000041735	tmem237a
blue	ENSDARG00000041926	dlg4a
blue	ENSDARG00000041960	si:ch211-173a9.6
blue	ENSDARG00000042041	tal2
blue	ENSDARG00000042090	si:ch73-55i23.1
blue	ENSDARG00000042123	nudt3b
blue	ENSDARG00000042128	pacsin1b
blue	ENSDARG00000042249	si:ch211-220f12.1
blue	ENSDARG00000042336	impdh1a
blue	ENSDARG00000042383	zbtb25
blue	ENSDARG00000042410	rab40b
blue	ENSDARG00000042477	nr2c2
blue	ENSDARG00000042534	rsrc2
blue	ENSDARG00000042557	rnf144ab
blue	ENSDARG00000042608	ica1
blue	ENSDARG00000042677	cadm1b
blue	ENSDARG00000042723	gfra2a
blue	ENSDARG00000042784	gdf7
blue	ENSDARG00000042796	yy1a
blue	ENSDARG00000042837	atp1b3b
blue	ENSDARG00000042846	disp2
blue	ENSDARG00000042861	ltk
blue	ENSDARG00000042872	zdhhc8a
blue	ENSDARG00000042922	gpr173
blue	ENSDARG00000042934	ctgfa
blue	ENSDARG00000042946	hook1
blue	ENSDARG00000042948	dnajc5aa
blue	ENSDARG00000042961	zgc:100920
blue	ENSDARG00000042962	dgcr2
blue	ENSDARG00000042974	sypa
blue	ENSDARG00000043135	pomca
blue	ENSDARG00000043148	slc1a3b
blue	ENSDARG00000043179	bag4
blue	ENSDARG00000043220	kcnh5a
blue	ENSDARG00000043226	nfixa
blue	ENSDARG00000043241	arrb1
blue	ENSDARG00000043257	ckbb
blue	ENSDARG00000043323	lnx1
blue	ENSDARG00000043394	si:dkey-71h2.2
blue	ENSDARG00000043406	slc8a1b
blue	ENSDARG00000043410	xkr6b
blue	ENSDARG00000043448	itm2ca
blue	ENSDARG00000043474	atp2b3a
blue	ENSDARG00000043483	otx5
blue	ENSDARG00000043643	ehbp1
blue	ENSDARG00000043661	cadpsa
blue	ENSDARG00000043662	cnih2
blue	ENSDARG00000043673	si:dkey-174m14.3
blue	ENSDARG00000043697	nefmb
blue	ENSDARG00000043746	nrxn3a
blue	ENSDARG00000043799	zmp:0000000619
blue	ENSDARG00000043818	si:ch211-119c20.2
blue	ENSDARG00000043858	cdk19
blue	ENSDARG00000043907	fgf11b
blue	ENSDARG00000043932	stmn4l
blue	ENSDARG00000044010	loxl2a
blue	ENSDARG00000044015	gfra2b
blue	ENSDARG00000044053	vsnl1b
blue	ENSDARG00000044062	ctbp2a
blue	ENSDARG00000044091	pitpnab
blue	ENSDARG00000044161	grid1b
blue	ENSDARG00000044183	prkab1a
blue	ENSDARG00000044216	fto
blue	ENSDARG00000044319	fstl4
blue	ENSDARG00000044328	ankrd46a
blue	ENSDARG00000044362	unc119b
blue	ENSDARG00000044375	zgc:158291
blue	ENSDARG00000044381	siah2l
blue	ENSDARG00000044433	sned1
blue	ENSDARG00000044532	nr4a2b
blue	ENSDARG00000044541	ppp1r14ba
blue	ENSDARG00000044544	zgc:110782
blue	ENSDARG00000044569	cldn19
blue	ENSDARG00000044574	rbms3
blue	ENSDARG00000044600	plppr2b
blue	ENSDARG00000044632	myo7ab
blue	ENSDARG00000044769	kctd13
blue	ENSDARG00000044815	serinc4
blue	ENSDARG00000044827	wnt7aa
blue	ENSDARG00000044847	zgc:171599
blue	ENSDARG00000044894	zgc:113307
blue	ENSDARG00000045014	tuba2
blue	ENSDARG00000045051	slc16a3
blue	ENSDARG00000045087	cdk5r1b
blue	ENSDARG00000045131	id4
blue	ENSDARG00000045164	nptx2b
blue	ENSDARG00000045296	cops9
blue	ENSDARG00000045301	st8sia3
blue	ENSDARG00000045343	usp46
blue	ENSDARG00000045367	tuba1b
blue	ENSDARG00000045378	pi15a
blue	ENSDARG00000045408	tagln
blue	ENSDARG00000045447	slc35g2b
blue	ENSDARG00000045463	ralaa
blue	ENSDARG00000045482	stk38l
blue	ENSDARG00000045483	lrtm2a
blue	ENSDARG00000045556	si:dkey-37f18.2
blue	ENSDARG00000045594	shisal1a
blue	ENSDARG00000045633	asb15a
blue	ENSDARG00000045639	elavl4
blue	ENSDARG00000045675	mdm1
blue	ENSDARG00000045685	cntn1b
blue	ENSDARG00000045695	myca
blue	ENSDARG00000045708	adm2a
blue	ENSDARG00000045747	cped1
blue	ENSDARG00000045750	syt10
blue	ENSDARG00000045760	prmt8b
blue	ENSDARG00000045808	rlbp1b
blue	ENSDARG00000045904	nr2e3
blue	ENSDARG00000045936	pax6b
blue	ENSDARG00000045945	syn2a
blue	ENSDARG00000046012	slc47a1
blue	ENSDARG00000046107	caskin1
blue	ENSDARG00000046150	b4galnt4a
blue	ENSDARG00000051824	tmeff2a
blue	ENSDARG00000051852	kcnc1a
blue	ENSDARG00000051875	islr2
blue	ENSDARG00000051879	abcc8
blue	ENSDARG00000051896	fbn2a
blue	ENSDARG00000051915	pde5ab
blue	ENSDARG00000052072	dnajb9a
blue	ENSDARG00000052122	rag1
blue	ENSDARG00000052164	znf507
blue	ENSDARG00000052247	alkbh4
blue	ENSDARG00000052343	spata18
blue	ENSDARG00000052411	si:dkey-71l1.1
blue	ENSDARG00000052428	si:dkey-43k4.3
blue	ENSDARG00000052450	hspb2
blue	ENSDARG00000052468	si:dkeyp-80c12.7
blue	ENSDARG00000052482	arhgef11
blue	ENSDARG00000052558	porcn
blue	ENSDARG00000052644	ca10a
blue	ENSDARG00000052648	hs3st4
blue	ENSDARG00000052700	si:dkey-162b23.4
blue	ENSDARG00000052739	egf
blue	ENSDARG00000052747	gpatch3
blue	ENSDARG00000052764	chrnb3a
blue	ENSDARG00000052766	si:ch211-239f4.1
blue	ENSDARG00000052769	glrbb
blue	ENSDARG00000052893	rx3
blue	ENSDARG00000052905	zgc:165423
blue	ENSDARG00000052923	zgc:113162
blue	ENSDARG00000052948	zgc:195023
blue	ENSDARG00000052982	gabrr2a
blue	ENSDARG00000053026	kif19
blue	ENSDARG00000053130	pcp4a
blue	ENSDARG00000053133	b3gnt7l
blue	ENSDARG00000053190	galnt16
blue	ENSDARG00000053205	ppfia4
blue	ENSDARG00000053272	si:dkey-166d12.2
blue	ENSDARG00000053279	apln
blue	ENSDARG00000053358	basp1
blue	ENSDARG00000053362	cilp
blue	ENSDARG00000053364	pax10
blue	ENSDARG00000053375	nptxrb
blue	ENSDARG00000053431	si:ch211-257p13.3
blue	ENSDARG00000053453	mpp2a
blue	ENSDARG00000053454	cntn3b
blue	ENSDARG00000053459	rybpb
blue	ENSDARG00000053487	osbp2
blue	ENSDARG00000053493	aldh1a2
blue	ENSDARG00000053517	si:dkey-1f12.3
blue	ENSDARG00000053520
blue	ENSDARG00000053528	nog3
blue	ENSDARG00000053544	hspa4l
blue	ENSDARG00000053547	jakmip2
blue	ENSDARG00000053559	tspan3b
blue	ENSDARG00000053583	cers6
blue	ENSDARG00000053617	camk2a
blue	ENSDARG00000053665	gabrg2
blue	ENSDARG00000053695	zgc:162948
blue	ENSDARG00000053724
blue	ENSDARG00000053728	ttll3
blue	ENSDARG00000053771	apbb3
blue	ENSDARG00000053890	tmem62
blue	ENSDARG00000053896	slc30a1b
blue	ENSDARG00000053987	htr1b
blue	ENSDARG00000054036	rnf34b
blue	ENSDARG00000054055	ostn
blue	ENSDARG00000054137	adgrg6
blue	ENSDARG00000054253	sobpa
blue	ENSDARG00000054271	cdkn1bb
blue	ENSDARG00000054321	ngs
blue	ENSDARG00000054324	rerglb
blue	ENSDARG00000054332	trim66
blue	ENSDARG00000054378	pcbp3
blue	ENSDARG00000054442	cbx1b
blue	ENSDARG00000054456	clip3
blue	ENSDARG00000054575	waif2
blue	ENSDARG00000054588	cox6a2
blue	ENSDARG00000054683	prdm8b
blue	ENSDARG00000054723	si:ch211-242b18.1
blue	ENSDARG00000054749	lmo4b
blue	ENSDARG00000054754	hs6st1a
blue	ENSDARG00000054794	plcxd3
blue	ENSDARG00000054797	zgc:153441
blue	ENSDARG00000054879	six3b
blue	ENSDARG00000054906	ier5l
blue	ENSDARG00000054931	ppp2r5b
blue	ENSDARG00000054963	alg1
blue	ENSDARG00000054978	kifc3
blue	ENSDARG00000055009	col4a1
blue	ENSDARG00000055099	fam184b
blue	ENSDARG00000055106	znf148
blue	ENSDARG00000055129	pim3
blue	ENSDARG00000055132	lrfn4a
blue	ENSDARG00000055206	dtnbp1b
blue	ENSDARG00000055216	tuba1c
blue	ENSDARG00000055223	ablim2
blue	ENSDARG00000055288	prelid3a
blue	ENSDARG00000055398	foxc1b
blue	ENSDARG00000055400	si:dkey-56f14.7
blue	ENSDARG00000055429	kat6b
blue	ENSDARG00000055455	gpm6aa
blue	ENSDARG00000055493	hic1
blue	ENSDARG00000055502	cicb
blue	ENSDARG00000055543	appb
blue	ENSDARG00000055552	dvl1b
blue	ENSDARG00000055570	gpr61
blue	ENSDARG00000055585	c1galt1a
blue	ENSDARG00000055642	si:ch211-217a12.1
blue	ENSDARG00000055644	prss60.2
blue	ENSDARG00000055672	map3k10
blue	ENSDARG00000055752	npas4a
blue	ENSDARG00000055754	smc1a
blue	ENSDARG00000055798	heyl
blue	ENSDARG00000055825	celsr3
blue	ENSDARG00000055843	cdh10a
blue	ENSDARG00000055855	kcnc3a
blue	ENSDARG00000055874	cpe
blue	ENSDARG00000056004	sprn
blue	ENSDARG00000056019	ttbk1a
blue	ENSDARG00000056021	sostdc1b
blue	ENSDARG00000056045	si:ch73-139e5.4
blue	ENSDARG00000056080	si:dkey-191g9.5
blue	ENSDARG00000056084	igsf21b
blue	ENSDARG00000056092	si:dkey-12h9.6
blue	ENSDARG00000056108	ndufa4
blue	ENSDARG00000056181	ncam1a
blue	ENSDARG00000056226	creb3l3a
blue	ENSDARG00000056244	zgc:171740
blue	ENSDARG00000056262	slc35g2a
blue	ENSDARG00000056292	vsx1
blue	ENSDARG00000056294	si:ch211-183d21.3
blue	ENSDARG00000056347	rab3aa
blue	ENSDARG00000056478	si:ch211-168b3.1
blue	ENSDARG00000056499	ca6
blue	ENSDARG00000056519	si:dkey-280e21.3
blue	ENSDARG00000056541	nr0b1
blue	ENSDARG00000056554	rap1gap
blue	ENSDARG00000056566	necab1
blue	ENSDARG00000056590	calca
blue	ENSDARG00000056623	ptenb
blue	ENSDARG00000056625	trpc6a
blue	ENSDARG00000056630	angptl5
blue	ENSDARG00000056633	fgf13b
blue	ENSDARG00000056639	carmil2
blue	ENSDARG00000056664	arfip2b
blue	ENSDARG00000056677
blue	ENSDARG00000056678	trim47
blue	ENSDARG00000056683	cdk5
blue	ENSDARG00000056690	mtmr1a
blue	ENSDARG00000056725	hmgb3a
blue	ENSDARG00000056742	crmp1
blue	ENSDARG00000056753	dctn1b
blue	ENSDARG00000056774	gpr37l1b
blue	ENSDARG00000056797	ppp2r2ca
blue	ENSDARG00000056805	plch2b
blue	ENSDARG00000056833	svopa
blue	ENSDARG00000056840	otud5b
blue	ENSDARG00000056871	ap4m1
blue	ENSDARG00000056873	and3
[truncated: 22,965 more rows]
