# Supplementary material for: Dynamics of cardiomyocyte transcriptome and chromatin landscape demarcates key events of heart development
Source: HighWire-hosted journal article supplement (doi:10.1101/gr.244491.118), 2019-02-13
Supplement: Supplement_Table_5.xlsx [file Supplement_Table_5.xlsx]

## Sheet: Sheet1
Supplement Table 5. Differentially accessible gene-associated NFRs from proximal TSS regions (+/- 3kb) at different stages of heart development. Numbers in columns are log2FC and padj corresponding to compared conditions as indicated in table headers.
geneID	ZFIN_ID	ATACseq_24-48_log2FC	ATACseq_24-48_padj	ATACseq_48-72_log2FC	ATACseq_48-72_padj
ENSDARG00000000001	slc35a5	-0.342533	0.829471	0.408151	0.999799
ENSDARG00000000002	ccdc80	-0.479995	0.715138	-0.187133	0.999799
ENSDARG00000000018	nrf1	-0.714262	0.0543978	0.653028	0.999799
ENSDARG00000000019	ube2h	-0.555431	0.332473	0.574812	0.999799
ENSDARG00000000068	slc9a3r1a	0.150646	0.89472	0.0156011	0.999799
ENSDARG00000000069	dap	-0.251352	0.754237	0.341339	0.999799
ENSDARG00000000086	itsn1	-0.627764	0.360544	1.03399	0.999799
ENSDARG00000000103	myh10	0.285539	0.640839	-0.132225	0.999799
ENSDARG00000000142	tmem267	0.0082861	0.994453	0.0976849	0.999799
ENSDARG00000000151	thraa	-0.170237	0.749339	-0.0558898	0.999799
ENSDARG00000000161	itsn2a	-0.293433	0.628926	-0.0783484	0.999799
ENSDARG00000000175	hoxb2a	-0.46396	0.631721	0.282632	0.999799
ENSDARG00000000183	ptpn4b	-2.28357	#N/A	0.997986	0.999799
ENSDARG00000000189	sema6e	1.54257	0.0437027	-0.544487	0.999799
ENSDARG00000000229	usp49	-0.678073	0.0562662	0.134889	0.999799
ENSDARG00000000241	slc40a1	-0.165589	0.871754	0.128435	0.999799
ENSDARG00000000324	dcaf8	0.432696	#N/A	-0.379509	0.999799
ENSDARG00000000369	prkag3b	0.855395	0.425861	-0.21327	0.999799
ENSDARG00000000370	triob	0.48561	0.631459	-0.261757	0.999799
ENSDARG00000000380	pde6a	0.695403	0.545475	0.132305	0.999799
ENSDARG00000000394	matr3l1.1	-0.0537319	0.966823	0.42998	0.999799
ENSDARG00000000423	si:ch73-314g15.3	0.788349	0.589457	-0.510497	0.999799
ENSDARG00000000442	slc39a13	-0.266637	0.818425	0.238161	0.999799
ENSDARG00000000460	nitr2b	1.16461	#N/A	-0.366848	0.999799
ENSDARG00000000472	cntn2	1.00515	#N/A	-0.772934	0.999799
ENSDARG00000000474	tnni1a	0.424148	#N/A	-0.146277	0.999799
ENSDARG00000000476	pms1	0.722786	0.462924	-0.639402	0.999799
ENSDARG00000000489	upf3b	-1.35595	0.0138655	0.308003	0.999799
ENSDARG00000000503	stx1b	-0.0536204	0.976012	0.0068911	0.999799
ENSDARG00000000516	ankar	0.128947	0.928091	-0.199352	0.999799
ENSDARG00000000529	ofd1	0.508527	0.70319	-0.058714	0.999799
ENSDARG00000000540	asnsd1	0.244969	0.873264	-0.022361	0.999799
ENSDARG00000000540	asdurf	0.244969	0.873264	-0.022361	0.999799
ENSDARG00000000542	gtf2e1	-0.340784	0.776227	0.542718	0.999799
ENSDARG00000000551	slc1a4	-0.752818	0.325659	0.781917	0.999799
ENSDARG00000000563	ttn.1	0.623332	#N/A	-0.690064	0.999799
ENSDARG00000000567	znf281a	-0.0325464	0.966823	-0.216068	0.999799
ENSDARG00000000568	ell	-0.286916	0.551955	0.212294	0.999799
ENSDARG00000000588	grasp	-0.923927	0.0631808	0.403298	0.999799
ENSDARG00000000606	dnah6	0.715919	0.457075	-0.279428	0.999799
ENSDARG00000000631	ptpn4a	-0.0204461	0.980136	-0.647362	0.999799
ENSDARG00000000638	opn1mw4	0.680951	#N/A	-0.109677	0.999799
ENSDARG00000000666	creg2	0.265967	0.76741	-0.129613	0.999799
ENSDARG00000000690	sypl2b	1.05648	0.120761	0.0731422	0.999799
ENSDARG00000000729	daxx	0.167473	0.829455	0.147753	0.999799
ENSDARG00000000730	slc6a22.1	-0.183791	0.811288	-0.109134	0.999799
ENSDARG00000000747	lcmt2	0.65941	0.698622	0.121296	0.999799
ENSDARG00000000760	znf511	-0.233637	0.867232	0.0223063	0.999799
ENSDARG00000000767	spi1b	-0.952788	0.0924781	-0.0713435	0.999799
ENSDARG00000000779	scfd1	-0.23501	0.860273	-0.218399	0.999799
ENSDARG00000000796	nr4a1	-0.906436	0.00140173	0.294191	0.999799
ENSDARG00000000804	rassf6	0.0834093	0.96924	-0.612404	0.999799
ENSDARG00000000830	telo2	0.307822	0.779687	0.0829722	0.999799
ENSDARG00000000837	snx9a	-0.754575	0.646109	0.485924	0.999799
ENSDARG00000000853	dstyk	-0.890954	0.205181	0.217267	0.999799
ENSDARG00000000857	mapk14a	0.517346	0.229349	-0.272294	0.999799
ENSDARG00000000861	scrib	-0.514209	0.114789	0.397761	0.999799
ENSDARG00000000887	zgc:56699	0.333309	#N/A	0.243832	0.999799
ENSDARG00000000935	unk	0.307303	0.473824	0.214615	0.999799
ENSDARG00000000943	dzip1	-0.359978	0.654878	-0.316087	0.999799
ENSDARG00000000966	ncor2	1.61782	0.0272526	-0.125532	0.999799
ENSDARG00000001014	myh9b	-0.429487	0.785418	-0.598476	0.999799
ENSDARG00000001015	znf384l	0.649444	0.620597	0.345111	0.999799
ENSDARG00000001127	slc17a6a	-0.124739	0.944521	0.179704	0.999799
ENSDARG00000001129	dicer1	-1.34621	0.040942	-0.410461	0.999799
ENSDARG00000001154	rimbp2	0.556894	#N/A	0.758053	0.999799
ENSDARG00000001162	matr3l1.1	0.751042	#N/A	1.06868	0.999799
ENSDARG00000001169	hsd17b8	-0.653572	0.281206	-0.126197	0.999799
ENSDARG00000001210	arl14ep	-0.263987	#N/A	0.847372	0.999799
ENSDARG00000001220	mycbp2	-0.0302627	0.955605	0.197728	0.999799
ENSDARG00000001234	map4k2	-0.492068	0.76007	-0.363089	0.999799
ENSDARG00000001241	puf60b	0.0687645	0.944776	0.217654	0.999799
ENSDARG00000001244	srrm1	0.0787367	0.951804	-0.108444	0.999799
ENSDARG00000001249	pcgf1	-0.0223949	0.979046	-0.0650808	0.999799
ENSDARG00000001259	gas2a	0.372068	#N/A	0.718563	0.999799
ENSDARG00000001303	psmb8a	0.306624	#N/A	-1.42444	0.999799
ENSDARG00000001313	g2e3	-0.071694	0.928444	0.133245	0.999799
ENSDARG00000001354	slc6a22.2	-0.584464	0.699444	-0.259335	0.999799
ENSDARG00000001414	mctp2a	-1.48669	0.29789	1.32754	0.999799
ENSDARG00000001431	actn3b	-0.0762906	0.955983	-0.127835	0.999799
ENSDARG00000001437	slc2a1a	-0.0834893	0.967985	-0.355664	0.999799
ENSDARG00000001442	inppl1b	1.10543	#N/A	0.558038	0.999799
ENSDARG00000001452	adam8a	0.0853684	0.949367	-0.00529548	0.999799
ENSDARG00000001463	tdh2	-1.1336	0.00938059	0.0765907	0.999799
ENSDARG00000001470	mhc1zea	-0.333736	#N/A	0.261824	0.999799
ENSDARG00000001549	sp3a	-0.11753	0.866757	-0.130595	0.999799
ENSDARG00000001557	tomm34	0.336943	0.556031	-0.201167	0.999799
ENSDARG00000001558	kifc1	-0.992415	0.084131	0.226308	0.999799
ENSDARG00000001559	csmd2	0.829993	0.446547	-0.50665	0.999799
ENSDARG00000001572	prf1.3	0.394764	#N/A	-0.215436	0.999799
ENSDARG00000001578	echs1	-0.269208	0.808156	-0.211794	0.999799
ENSDARG00000001621	nfyal	0.414047	0.221088	0.387405	0.999799
ENSDARG00000001634	kirrel1a	0.395914	0.517922	-0.123093	0.999799
ENSDARG00000001656	psmb13a	0.853176	#N/A	-0.301622	0.999799
ENSDARG00000001676	gpm6bb	-0.614137	0.252022	-0.0368726	0.999799
ENSDARG00000001686	uckl1a	0.706947	0.490915	-0.0439997	0.999799
ENSDARG00000001712	si:ch211-247n2.1	0.773164	#N/A	-0.981557	0.999799
ENSDARG00000001721	oc90	-1.18686	#N/A	-0.0428805	0.999799
ENSDARG00000001729	strn3	-0.473896	#N/A	-0.0775322	0.999799
ENSDARG00000001733	gulp1a	0.809059	0.496224	-0.533797	0.999799
ENSDARG00000001734	fkbp8	0.266588	0.850681	0.240397	0.999799
ENSDARG00000001754	noc2l	-1.69712	0.020309	0.918503	0.999799
ENSDARG00000001760	tnxba	0.167318	0.927352	-0.390518	0.999799
ENSDARG00000001767	slc29a2	-0.315471	0.775364	0.040229	0.999799
ENSDARG00000001769	ptpra	-0.0898913	0.902664	0.152995	0.999799
ENSDARG00000001771	otol1a	-1.03306	#N/A	-0.166494	0.999799
ENSDARG00000001776	stim2b	-0.074471	0.931862	-0.198172	0.999799
ENSDARG00000001777	nup155	-0.189494	0.891094	0.115749	0.999799
ENSDARG00000001781	tspan11	-1.05008	#N/A	1.21017	0.999799
ENSDARG00000001782	prkacba	-2.35277	5.05855e-05	0.415764	0.999799
ENSDARG00000001785	irx2a	0.701522	0.413694	-0.500078	0.999799
ENSDARG00000001788	atp5po	-0.832948	0.148643	0.570792	0.999799
ENSDARG00000001803	kcnh6a	-0.783501	0.465788	0.34267	0.999799
ENSDARG00000001804	zgc:112148	1.08251	0.463735	-1.11177	0.999799
ENSDARG00000001807	tnfrsf21	-1.02691	0.0156391	0.500589	0.999799
ENSDARG00000001817	zmp:0000000521	-0.361765	0.523463	-0.208811	0.999799
ENSDARG00000001825	cfap43	-0.490472	0.724675	0.992882	0.999799
ENSDARG00000001829	zgc:112982	0.373307	0.808598	0.0602075	0.999799
ENSDARG00000001835	nalcn	0.852283	0.393841	0.163426	0.999799
ENSDARG00000001857	aff4	-0.525529	0.124261	0.160112	0.999799
ENSDARG00000001859	dbx1b	1.42813	0.0204927	-0.146878	0.999799
ENSDARG00000001873	phgdh	0.628998	#N/A	-0.943823	0.999799
ENSDARG00000001879	nav2b	0.810968	0.571	0.605203	0.999799
ENSDARG00000001880	stx3a	-0.537843	0.451893	-0.220738	0.999799
ENSDARG00000001881	cacnb3a	0.524495	#N/A	-0.831509	0.999799
ENSDARG00000001882	kbtbd12	1.36476	0.187441	-0.869668	0.999799
ENSDARG00000001888	ppm1ba	-0.373166	0.610533	0.200414	0.999799
ENSDARG00000001889	tuba1a	0.357224	0.706507	0.00880006	0.999799
ENSDARG00000001890	stt3b	-0.0736766	0.968204	0.228932	0.999799
ENSDARG00000001891	syt14b	0.68594	0.505024	-0.166977	0.999799
ENSDARG00000001897	man2b1	0.0711787	0.963248	-0.737418	0.999799
ENSDARG00000001898	manea	-0.253435	0.53567	-0.0786694	0.999799
ENSDARG00000001906	si:dkey-247m21.3	0.536887	0.555004	-0.467551	0.999799
ENSDARG00000001909	vill	-0.275342	#N/A	-0.412431	0.999799
ENSDARG00000001910	rorab	-0.232694	0.536405	0.623736	0.999799
ENSDARG00000001912	drd4-rs	0.249353	#N/A	0.5946	0.999799
ENSDARG00000001913	palmda	-0.159468	0.938364	0.0647118	0.999799
ENSDARG00000001929	pink1	0.171812	0.914863	-0.374746	0.999799
ENSDARG00000001930	klhl15	-0.707113	0.209132	0.264703	0.999799
ENSDARG00000001933	prkag2b	0.547296	0.502333	0.0714588	0.999799
ENSDARG00000001939	b3gat3	-0.659143	0.481369	0.0935675	0.999799
ENSDARG00000001940	dnajc1	0.0280498	0.979785	-0.499055	0.999799
ENSDARG00000001953	pfkfb3	0.376832	0.589441	0.292363	0.999799
ENSDARG00000001968	dock5	-0.0587278	0.962517	-0.0110437	0.999799
ENSDARG00000001969	txlng	0.0624818	0.979046	0.225083	0.999799
ENSDARG00000001971	cthrc1b	1.53567	#N/A	0.649159	0.999799
ENSDARG00000001975	hsd11b2	0.339189	0.730985	-0.199938	0.999799
ENSDARG00000001976	fkbp16	-2.38152	0.00912978	0.788413	0.999799
ENSDARG00000001993	myhb	-0.775763	#N/A	1.32346	0.999799
ENSDARG00000001994	stxbp1a	1.22407	0.128751	0.373994	0.999799
ENSDARG00000001999	adamts18	-0.00465466	#N/A	-0.856231	0.999799
ENSDARG00000002002	lmcd1	0.587702	0.579276	-0.421315	0.999799
ENSDARG00000002006	rxrbb	0.661277	0.389953	-0.454221	0.999799
ENSDARG00000002013	grb10a	0.0460504	0.949212	-0.289288	0.999799
ENSDARG00000002016	ppil2	-0.507841	0.742146	0.710171	0.999799
ENSDARG00000002020	rictorb	0.622107	0.361946	-0.60586	0.999799
ENSDARG00000002021	pygb	-0.487034	0.193034	0.0062125	0.999799
ENSDARG00000002026	qkib	0.293941	0.838266	0.123762	0.999799
ENSDARG00000002031	tox4a	-0.13436	0.904337	0.229386	0.999799
ENSDARG00000002037	pfkfb2b	0.185045	0.825298	0.0336585	0.999799
ENSDARG00000002060	brf2	0.185833	0.917828	-0.44848	0.999799
ENSDARG00000002071	adss	1.25904	0.377271	0.542561	0.999799
ENSDARG00000002082	csnk2a1	-0.449635	0.326091	0.268961	0.999799
ENSDARG00000002084	lamb2	-0.462713	0.521658	0.106788	0.999799
ENSDARG00000002127	stam	0.249606	0.830684	-0.227608	0.999799
ENSDARG00000002128	cwf19l1	1.17625	#N/A	-0.577544	0.999799
ENSDARG00000002131	celf2	1.20902	0.0226408	0.354513	0.999799
ENSDARG00000002165	psme1	-1.65111	0.023604	0.041062	0.999799
ENSDARG00000002167	cacnb1	-0.470544	0.279431	0.313867	0.999799
ENSDARG00000002168	tra2b	-0.0878534	0.983346	0.766263	0.999799
ENSDARG00000002172	aplnra	-0.231993	0.841965	-0.240693	0.999799
ENSDARG00000002174	itfg2	-0.189438	0.881516	-0.318906	0.999799
ENSDARG00000002190	chmp2bb	0.460348	0.238994	-0.192931	0.999799
ENSDARG00000002192	aspn	-0.751715	#N/A	0.517901	0.999799
ENSDARG00000002193	rho	-0.169805	#N/A	1.46359	0.999799
ENSDARG00000002194	rhd	-0.853679	0.000121489	0.149076	0.999799
ENSDARG00000002196	bach1b	0.344279	0.509782	0.147411	0.999799
ENSDARG00000002197	pygl	0.156217	0.933875	0.291441	0.999799
ENSDARG00000002210	stk25a	0.714316	0.677788	0.0194339	0.999799
ENSDARG00000002215	rtca	0.722203	#N/A	-0.088943	0.999799
ENSDARG00000002216	tbx3a	-2.22393	0.0637765	0.061817	0.999799
ENSDARG00000002217	scocb	-0.511496	0.581923	-0.52399	0.999799
ENSDARG00000002220	zgc:103692	-0.711772	0.174351	0.482285	0.999799
ENSDARG00000002230	sypb	-0.606926	0.541235	0.842058	0.999799
ENSDARG00000002235	mmp14a	0.101456	#N/A	0.123531	0.999799
ENSDARG00000002240	psmb6	0.0875308	0.959622	-0.0106861	0.999799
ENSDARG00000002241	kcna2a	1.91884	0.0229383	0.460832	0.999799
ENSDARG00000002249	tbxas1	-1.10989	0.215436	0.418255	0.999799
ENSDARG00000002255	epb41l3a	0.583269	0.529788	0.00801765	0.999799
ENSDARG00000002264	mrpl41	-0.0311595	0.973367	0.0308739	0.999799
ENSDARG00000002267	dcaf13	0.058094	0.966823	-0.110166	0.999799
ENSDARG00000002271	zfand5b	0.529823	0.247906	0.0556442	0.999799
ENSDARG00000002285	mcoln1a	-0.630978	0.320274	0.0552907	0.999799
ENSDARG00000002293	si:ch211-197g15.6	0.316629	#N/A	-0.163411	0.999799
ENSDARG00000002295	si:dkey-21p1.3	1.65878	#N/A	-1.198	0.999799
ENSDARG00000002298	ankrd22	1.28361	#N/A	-0.724761	0.999799
ENSDARG00000002299	arsh	0.54264	0.540946	0.0276842	0.999799
ENSDARG00000002300	p2rx2	-0.561326	#N/A	1.00377	0.999799
ENSDARG00000002304	gins2	-0.642206	0.282844	-0.149669	0.999799
ENSDARG00000002305	me3	-0.0864286	0.937758	0.602609	0.999799
ENSDARG00000002330	lhx8a	-0.0978783	0.936296	-0.270978	0.999799
ENSDARG00000002332	frmd6	0.325779	0.499115	0.102777	0.999799
ENSDARG00000002333	fam102bb	-1.40064	0.0501846	0.35676	0.999799
ENSDARG00000002336	dlc	0.487463	0.458109	-0.177595	0.999799
ENSDARG00000002339	sgf29	0.282054	0.896538	-0.866685	0.999799
ENSDARG00000002344	tubb4b	-0.3928	0.188872	0.306176	0.999799
ENSDARG00000002347	cyp11a1	-0.796775	#N/A	1.22237	0.999799
ENSDARG00000002353	tagapa	-0.196162	0.813784	0.00644048	0.999799
ENSDARG00000002355	shpk	-0.0268629	#N/A	0.279445	0.999799
ENSDARG00000002362	ubald1a	0.173665	0.800089	-0.0614446	0.999799
ENSDARG00000002365	cers5	0.392331	0.61217	-0.060123	0.999799
ENSDARG00000002369	si:ch211-202a12.4	-0.382293	0.758275	0.126489	0.999799
ENSDARG00000002377	mief2	-0.268975	0.712196	0.175048	0.999799
ENSDARG00000002385	atm	0.534636	0.721897	-0.676707	0.999799
ENSDARG00000002391	tlcd1	2.0829	#N/A	-0.0924594	0.999799
ENSDARG00000002394	ugt5d1	0.276499	#N/A	-0.0116138	0.999799
ENSDARG00000002396	cry-dash	-1.26321	8.08555e-05	0.0876885	0.999799
ENSDARG00000002401	gale	0.741988	0.424374	0.0692494	0.999799
ENSDARG00000002402	ercc3	-0.0272743	0.977185	0.147083	0.999799
ENSDARG00000002403	nusap1	-0.499716	0.195817	0.0857237	0.999799
ENSDARG00000002405	si:ch211-225b11.1	-0.899373	0.024929	-0.115407	0.999799
ENSDARG00000002445	prdm1a	-2.34148	0.0209207	1.07774	0.999799
ENSDARG00000002463	arhgef37	-0.177378	0.901245	0.397671	0.999799
ENSDARG00000002467	rdh14b	-0.321562	0.691862	0.0934959	0.999799
ENSDARG00000002479	ercc6l	0.224559	0.840023	-0.269448	0.999799
ENSDARG00000002483	wnt7ab	0.820523	0.628926	-0.165657	0.999799
ENSDARG00000002487	noc3l	1.00807	#N/A	0.790284	0.999799
ENSDARG00000002494	itgb6	2.03693	#N/A	-1.09784	0.999799
ENSDARG00000002506	zgc:92818	-0.347028	0.699025	0.0604071	0.999799
ENSDARG00000002507	itga10	0.224064	#N/A	-0.502477	0.999799
ENSDARG00000002508	ankrd33ab	-0.10356	#N/A	-0.437133	0.999799
ENSDARG00000002509	zgc:153911	-0.563202	0.456903	-0.423224	0.999799
ENSDARG00000002510	dmbx1b	0.219347	0.881988	-1.67415	0.999799
ENSDARG00000002523	hsdl2	0.72826	0.104159	0.155454	0.999799
ENSDARG00000002533	adora2b	-0.167879	0.894593	0.219901	0.999799
ENSDARG00000002536	tm9sf4	-0.179149	0.839601	0.208235	0.999799
ENSDARG00000002538	smu1a	1.29023	#N/A	-0.640521	0.999799
ENSDARG00000002546	rundc3ab	0.304914	0.817735	-0.039763	0.999799
ENSDARG00000002549	eif3eb	0.195006	#N/A	0.240684	0.999799
ENSDARG00000002552	mapkapk2a	-1.32994	0.00630002	0.472703	0.999799
ENSDARG00000002564	syngr1a	0.246226	0.811288	0.141784	0.999799
ENSDARG00000002571	tmod2	-0.215043	0.705271	-0.0940679	0.999799
ENSDARG00000002576	cabp5a	-0.865034	#N/A	0.00362728	0.999799
ENSDARG00000002582	tbx15	0.00245695	0.998373	-0.623299	0.999799
ENSDARG00000002587	dpysl3	0.0789681	0.92886	-0.247097	0.999799
ENSDARG00000002589	mylpfb	-0.197066	0.878736	-0.261519	0.999799
ENSDARG00000002591	ruvbl1	0.125015	0.863781	-0.0860864	0.999799
ENSDARG00000002593	slc45a2	1.42442	0.0655415	-0.613517	0.999799
ENSDARG00000002597	pabpc1l	0.431507	#N/A	0.885041	0.999799
ENSDARG00000002600	pcsk1	1.23171	0.0868859	0.389789	0.999799
ENSDARG00000002601	irx7	-0.803895	0.426884	-0.616664	0.999799
ENSDARG00000002607	unm_sa1614	-0.0976154	0.94352	0.0372846	0.999799
ENSDARG00000002609	rnf145a	-1.24192	0.0170757	0.777838	0.999799
ENSDARG00000002634	b4galt1	-0.338908	#N/A	-0.184345	0.999799
ENSDARG00000002635	zgc:85722	1.01949	0.479571	0.316122	0.999799
ENSDARG00000002642	sh3gl1b	0.0292675	0.982137	0.0654064	0.999799
ENSDARG00000002644	rgs5a	1.78211	0.0453367	-0.758583	0.999799
ENSDARG00000002656	stxbp5a	0.531672	0.50439	0.295627	0.999799
ENSDARG00000002659	mapre1b	-0.181264	0.887521	0.0243016	0.999799
ENSDARG00000002663	optn	1.1777	0.000794991	0.422589	0.999799
ENSDARG00000002666	kcnj1b	0.396715	#N/A	0.100703	0.999799
ENSDARG00000002670	zgc:113944	-0.0185676	0.987407	-0.0487932	0.999799
ENSDARG00000002682	tbcela	-0.533201	0.256512	-0.0291363	0.999799
ENSDARG00000002690	rabif	-0.574442	#N/A	0.740395	0.999799
ENSDARG00000002696	gnb3b	-0.273476	0.879396	0.0465919	0.999799
ENSDARG00000002701	rasl12	0.151698	#N/A	0.492678	0.999799
ENSDARG00000002707	her11	0.106415	#N/A	-1.16634	0.999799
ENSDARG00000002710	ncl	0.494907	0.766826	-0.201372	0.999799
ENSDARG00000002720	utp15	-0.769938	#N/A	0.0530254	0.999799
ENSDARG00000002728	kiss1ra	2.27001	0.0235564	-0.058671	0.999799
ENSDARG00000002731	sdc2	-0.0878532	#N/A	0.15951	0.999799
ENSDARG00000002732	spon2b	0.750882	#N/A	0.074057	0.999799
ENSDARG00000002745	tdh	-0.32789	0.4462	0.00130679	0.999799
ENSDARG00000002748	sema6d	-0.807127	0.0142488	0.241509	0.999799
ENSDARG00000002750	phf20a	0.233325	0.857506	-0.0834482	0.999799
ENSDARG00000002754	pdcd2l	-0.122116	0.892201	0.432166	0.999799
ENSDARG00000002758	dedd1	0.0150496	0.983346	0.174114	0.999799
ENSDARG00000002760	gdf5	0.286272	0.850638	0.0640756	0.999799
ENSDARG00000002764	miox	-0.139327	#N/A	0.37827	0.999799
ENSDARG00000002768	pvalb2	-0.444853	#N/A	-0.00953567	0.999799
ENSDARG00000002771	si:ch211-48m9.1	0.222551	0.902529	0.196482	0.999799
ENSDARG00000002773	htr1fa	1.56415	#N/A	0.368175	0.999799
ENSDARG00000002779	pdx1	1.14748	0.154697	-0.380408	0.999799
ENSDARG00000002787	tle3a	-0.549388	0.0226222	0.347595	0.999799
ENSDARG00000002790	ap2m1a	-0.395146	0.585464	-0.0994073	0.999799
ENSDARG00000002791	atp1a1a.1	-0.564347	0.117212	-0.031171	0.999799
ENSDARG00000002792	arcn1a	-0.74092	0.452016	-0.181741	0.999799
ENSDARG00000002795	meis3	-0.438041	0.647084	-0.362402	0.999799
ENSDARG00000002798	cog8	0.774944	#N/A	-0.386192	0.999799
ENSDARG00000002816	rasgrf2b	1.66222	#N/A	0.807452	0.999799
ENSDARG00000002826	cep57l1	-0.297629	0.772456	0.0429415	0.999799
ENSDARG00000002830	trmt2a	0.294477	#N/A	-0.819102	0.999799
ENSDARG00000002831	col4a4	-0.601736	0.772077	0.140133	0.999799
ENSDARG00000002840	si:dkey-28b4.8	0.30828	0.459674	0.496714	0.999799
ENSDARG00000002847	fndc1	-0.137519	0.900959	-0.357998	0.999799
ENSDARG00000002872	zgc:113210	0.26581	#N/A	-0.0542062	0.999799
ENSDARG00000002877	reps1	-0.335965	0.592259	-0.166358	0.999799
ENSDARG00000002880	vps50	-1.611	0.0652579	-1.0362	0.999799
ENSDARG00000002894	aven	-0.881023	0.611673	0.505614	0.999799
ENSDARG00000002897	si:ch211-160o17.2	0.923152	#N/A	0.459849	0.999799
ENSDARG00000002909	tjp3	0.221878	0.841406	0.616666	0.999799
ENSDARG00000002912	adipor1a	0.00985636	#N/A	-0.632045	0.999799
ENSDARG00000002916	sec31b	0.50161	0.739745	0.104168	0.999799
ENSDARG00000002917	gls2b	0.918082	#N/A	-0.39072	0.999799
ENSDARG00000002933	gbx2	-0.0214656	0.98333	-0.776094	0.999799
ENSDARG00000002937	meis1a	0.883056	0.425613	0.391231	0.999799
ENSDARG00000002945	bgnb	-0.258157	#N/A	-0.204129	0.999799
ENSDARG00000002947	abcd3b	-0.192863	0.894156	0.163498	0.999799
ENSDARG00000002949	ppp6c	0.00435157	0.99661	-0.18778	0.999799
ENSDARG00000002952	smo	0.118362	0.952006	0.531123	0.999799
ENSDARG00000002956	si:dkey-32n7.4	0.197505	#N/A	-0.349395	0.999799
ENSDARG00000002959	gpr34b	2.24217	#N/A	0.740809	0.999799
ENSDARG00000002967	pdap1b	-0.781189	0.591318	0.620313	0.999799
ENSDARG00000002968	a1cf	-2.07093	0.126803	1.34316	0.999799
ENSDARG00000002970	ss18	-0.528859	0.309507	0.302656	0.999799
ENSDARG00000002971	phc1	0.342905	0.645549	-0.015315	0.999799
ENSDARG00000002986	gda	-1.37992	#N/A	1.6176	0.999799
ENSDARG00000002988	tnnt2d	1.07114	#N/A	-1.22006	0.999799
ENSDARG00000002991	cep135	-0.475379	0.507005	-0.105088	0.999799
ENSDARG00000002994	itpkca	0.291398	0.637142	-0.183939	0.999799
ENSDARG00000003008	prkcea	-0.318021	#N/A	0.573521	0.999799
ENSDARG00000003017	ube2al	-0.441612	0.341594	0.0808611	0.999799
ENSDARG00000003021	hdac8	0.960387	0.0838461	-0.0568275	0.999799
ENSDARG00000003022	limk1b	-0.490896	0.555703	-0.868332	0.999799
ENSDARG00000003027	scnm1	-1.21419	0.22306	0.0210518	0.999799
ENSDARG00000003032	eif4a1b	-0.22919	0.635166	0.439744	0.999799
ENSDARG00000003035	hspa9	2.3371	0.026134	-1.41861	0.999799
ENSDARG00000003041		-1.59877	#N/A	0.339004	0.999799
ENSDARG00000003046	sorbs2a	0.237078	#N/A	0.272516	0.999799
ENSDARG00000003054	tacr3l	-0.585055	#N/A	0.195224	0.999799
ENSDARG00000003058	fgfr1op	-0.291273	0.74462	0.560773	0.999799
ENSDARG00000003068	gorasp1a	0.517149	0.657385	-0.268678	0.999799
ENSDARG00000003069	btbd7	0.149999	0.917548	0.306368	0.999799
ENSDARG00000003077	si:ch73-111m19.2	0.183389	#N/A	0.180159	0.999799
ENSDARG00000003081	mybphb	1.83122	#N/A	-0.244646	0.999799
ENSDARG00000003084	spire2	-0.389921	0.737381	-0.148621	0.999799
ENSDARG00000003085	stambpl1	0.346193	0.709374	0.15575	0.999799
ENSDARG00000003087	ubxn6	-0.0440381	0.974998	0.113966	0.999799
ENSDARG00000003091	oclnb	-0.958778	0.410872	-0.441167	0.999799
ENSDARG00000003098	kdm5bb	-0.846433	0.0159767	0.102573	0.999799
ENSDARG00000003109	rcan1a	0.0055409	0.994295	0.00065955	0.999799
ENSDARG00000003113	ada	1.18633	0.134457	-0.0809189	0.999799
ENSDARG00000003127	zgc:123105	-0.401456	0.397763	0.3074	0.999799
ENSDARG00000003132	apip	0.714428	0.517142	-0.0345095	0.999799
ENSDARG00000003142	dachc	-0.48128	0.590132	-0.242024	0.999799
ENSDARG00000003146	si:dkey-27m7.4	0.237345	0.91669	-0.51578	0.999799
ENSDARG00000003151	skp1	0.849383	#N/A	0.0407078	0.999799
ENSDARG00000003153	nudt21	-0.177273	0.905201	0.344705	0.999799
ENSDARG00000003157	nfkbil1	0.0926602	#N/A	-0.542474	0.999799
ENSDARG00000003165	nr2f6b	0.0388008	0.977335	-0.228972	0.999799
ENSDARG00000003167	mlst8	0.361526	0.844342	0.0133531	0.999799
ENSDARG00000003169	magi1b	0.552715	0.35646	-0.0435188	0.999799
ENSDARG00000003175	stx5al	-0.1823	0.830832	0.0123203	0.999799
ENSDARG00000003181	sult1st4	-0.723264	#N/A	0.775345	0.999799
ENSDARG00000003189	psmd1	-0.0479337	0.969464	-0.0538548	0.999799
ENSDARG00000003193	rassf7b	0.567993	0.645549	0.0645421	0.999799
ENSDARG00000003197	wdr21	0.0891924	0.944776	0.0876936	0.999799
ENSDARG00000003200	foxm1	-0.280811	0.714214	0.0422987	0.999799
ENSDARG00000003203	rhcga	0.456996	0.825728	0.149393	0.999799
ENSDARG00000003205	ngly1	0.718043	0.606552	-0.486816	0.999799
ENSDARG00000003206	chchd6a	-1.10147	0.043332	0.412731	0.999799
ENSDARG00000003207	mterf3	-0.332303	0.669778	-0.470455	0.999799
ENSDARG00000003208	pomk	0.710507	0.435715	0.0632982	0.999799
ENSDARG00000003210	si:ch73-86n2.1	0.22625	#N/A	0.868753	0.999799
ENSDARG00000003213	naa15a	0.0563714	0.964917	-0.340509	0.999799
ENSDARG00000003216	anxa2a	1.72862	#N/A	-0.493816	0.999799
ENSDARG00000003217	urb2	-1.24662	0.175601	0.934275	0.999799
ENSDARG00000003219	bin2a	-0.768168	0.0537961	0.660656	0.999799
ENSDARG00000003229	gdf9	-0.0234006	#N/A	-0.511181	0.999799
ENSDARG00000003235	nup88	-0.534347	0.71687	0.466871	0.999799
ENSDARG00000003244	gbp3	0.106372	#N/A	0.45365	0.999799
ENSDARG00000003250	pik3cd	-0.569626	0.754025	0.448581	0.999799
ENSDARG00000003251	zbtb22b	-0.445407	0.726803	0.0197055	0.999799
ENSDARG00000003257	zgc:101559	0.775771	0.173085	-0.125344	0.999799
ENSDARG00000003259	loxa	-0.103265	#N/A	0.0227987	0.999799
ENSDARG00000003269	clcn3	0.818629	#N/A	0.486953	0.999799
ENSDARG00000003270	dhps	0.870887	0.553008	-0.684885	0.999799
ENSDARG00000003281	pik3ip1	-0.990074	0.0184172	-0.188417	0.999799
ENSDARG00000003287	wdr12	-0.0960029	0.94658	0.218435	0.999799
ENSDARG00000003290	dab1b	0.989967	#N/A	0.339273	0.999799
ENSDARG00000003293	sox9a	0.105433	0.907655	-0.0414443	0.999799
ENSDARG00000003303	stc1	0.199273	0.947148	-0.124015	0.999799
ENSDARG00000003307	stx16	-0.388093	0.742987	-0.191208	0.999799
ENSDARG00000003308	emc2	-0.665959	0.328205	-0.143229	0.999799
ENSDARG00000003311	pank2	-0.0150193	0.983346	0.450355	0.999799
ENSDARG00000003313	eps8l1b	1.77225	#N/A	1.83727	0.999799
ENSDARG00000003320	fam91a1	-0.323278	0.7207	0.77325	0.999799
ENSDARG00000003326	cacng5a	1.57842	#N/A	-0.897406	0.999799
ENSDARG00000003328	slf2	0.700445	0.692935	0.260134	0.999799
ENSDARG00000003344	trpc2b	1.65848	#N/A	-0.448624	0.999799
ENSDARG00000003373	commd2	-0.312289	#N/A	0.304179	0.999799
ENSDARG00000003375	gng12a	0.0793892	0.913911	0.245381	0.999799
ENSDARG00000003380	si:dkey-275b16.2	0.473905	0.533576	0.528238	0.999799
ENSDARG00000003381	si:ch211-266g18.6	0.69667	0.658747	-0.352353	0.999799
ENSDARG00000003382	cwc25	0.45791	0.744591	-0.62921	0.999799
ENSDARG00000003383	asb8	-0.295301	0.857076	-0.528883	0.999799
ENSDARG00000003395	col4a3	1.70121	#N/A	0.972765	0.999799
ENSDARG00000003398	rbpja	-0.153911	0.687956	0.0717662	0.999799
ENSDARG00000003399	fgf8a	-0.42189	0.772199	0.296364	0.999799
ENSDARG00000003403	tenm1	0.220434	0.861285	0.171578	0.999799
ENSDARG00000003411	foxa2	0.930055	0.624874	0.055575	0.999799
ENSDARG00000003414	capslb	0.507583	#N/A	0.270304	0.999799
ENSDARG00000003420	chrna5	0.688303	#N/A	0.258375	0.999799
ENSDARG00000003421	igf2bp2a	0.0867447	0.941869	-0.193653	0.999799
ENSDARG00000003429	hnrnpdl	-0.0114886	0.99289	-0.272723	0.999799
ENSDARG00000003444	dhrs7	0.427967	0.50944	0.482984	0.999799
ENSDARG00000003446	ippk	-0.0714712	0.904337	0.482739	0.999799
ENSDARG00000003449	pde10a	-0.121736	0.886432	0.258258	0.999799
ENSDARG00000003462	fech	-0.883285	0.552136	1.15838	0.999799
ENSDARG00000003469	neurod4	-0.274481	0.821035	-0.629643	0.999799
ENSDARG00000003475	sult1st5	0.789871	#N/A	-0.0414075	0.999799
ENSDARG00000003486	ppp1caa	-0.321294	0.562113	0.281207	0.999799
ENSDARG00000003487	nup93	-0.197919	0.870413	0.260567	0.999799
ENSDARG00000003495	madd	0.500579	0.434887	-0.670322	0.999799
ENSDARG00000003512	anks1b	-1.43444	0.0156145	0.168367	0.999799
ENSDARG00000003517	impa1	0.359882	#N/A	-0.19543	0.999799
ENSDARG00000003519	aprt	0.0269228	0.9881	-0.0961263	0.999799
ENSDARG00000003520	tbc1d14	0.730306	0.0821449	0.312903	0.999799
ENSDARG00000003526	psma5	-0.795426	0.0338102	0.272551	0.999799
ENSDARG00000003527	mak16	-0.0714289	0.921418	-0.174982	0.999799
ENSDARG00000003531	tcea1	0.520785	0.443754	0.0101307	0.999799
ENSDARG00000003533	col8a1b	1.20148	#N/A	0.260963	0.999799
ENSDARG00000003544	adarb1b	3.06267	#N/A	-0.511546	0.999799
ENSDARG00000003553	gnrhr2	-0.67178	0.715834	-0.138567	0.999799
ENSDARG00000003564	dohh	0.2946	0.891094	-0.230436	0.999799
ENSDARG00000003573	dctn5	-0.543969	0.362442	0.139168	0.999799
ENSDARG00000003576	klhl32	0.633587	0.309945	-0.218169	0.999799
ENSDARG00000003584	pla2g7	0.0359183	0.968624	0.10342	0.999799
ENSDARG00000003592	surf1	-0.583821	0.550776	0.17116	0.999799
ENSDARG00000003599	rpl3	-0.568578	0.0785035	0.0832535	0.999799
ENSDARG00000003607	nr2f6a	-0.45301	0.229229	0.0989381	0.999799
ENSDARG00000003616	arih1	0.467655	0.522478	-0.145337	0.999799
ENSDARG00000003631	clockb	0.144761	0.87773	0.341674	0.999799
ENSDARG00000003632	zgc:172270	0.501708	#N/A	0.753604	0.999799
ENSDARG00000003635	mogat3b	-1.18283	0.201864	1.01333	0.999799
ENSDARG00000003641	tfg	0.625334	0.340877	-0.289325	0.999799
ENSDARG00000003642	zfyve19	-0.202726	0.864402	0.229244	0.999799
ENSDARG00000003655	tmem59l	-0.0614232	0.967434	0.4548	0.999799
ENSDARG00000003675	cryl1	-1.77173	#N/A	0.713743	0.999799
ENSDARG00000003680	runx1t1	-0.414246	0.569105	-0.22759	0.999799
ENSDARG00000003681	eif5	-0.304152	0.566755	0.209609	0.999799
ENSDARG00000003684	obsl1a	0.679648	0.643625	-0.80346	0.999799
ENSDARG00000003693	hars	0.542438	0.630544	0.133733	0.999799
ENSDARG00000003695	vdac3	-0.0789805	0.933685	0.309236	0.999799
ENSDARG00000003697	slc5a8l	-0.167039	#N/A	0.848596	0.999799
ENSDARG00000003699	atp7a	-0.399326	0.391124	0.161389	0.999799
ENSDARG00000003701	cldng	-0.401838	0.742146	-0.203038	0.999799
ENSDARG00000003705	prnprs3	-0.869438	0.429216	-0.0458665	0.999799
ENSDARG00000003706	ryr2b	-0.017542	#N/A	-0.229366	0.999799
ENSDARG00000003732	mitfa	1.2693	0.0168667	-0.00724016	0.999799
ENSDARG00000003749	polb	-0.459745	0.309507	-0.26401	0.999799
ENSDARG00000003750	pfas	-0.392587	0.505024	-0.145357	0.999799
ENSDARG00000003751	lats1	-0.36133	0.674416	-0.153907	0.999799
ENSDARG00000003754	tspan2a	2.99779	1.72739e-10	-0.377979	0.999799
ENSDARG00000003757	cnpy1	0.193578	0.742913	0.0914905	0.999799
ENSDARG00000003769	tada2b	-1.35849	0.269437	-0.441719	0.999799
ENSDARG00000003776	pip4k2aa	-1.49607	0.00131438	0.703925	0.999799
ENSDARG00000003779	ctnnd2b	0.603159	0.377271	0.454502	0.999799
ENSDARG00000003789	dennd5b	0.420934	0.610108	0.0193608	0.999799
ENSDARG00000003795	idh2	0.165181	0.873184	-0.0982787	0.999799
ENSDARG00000003797	asb2a.1	0.70606	#N/A	-0.246814	0.999799
ENSDARG00000003803		1.30226	#N/A	0.0659978	0.999799
ENSDARG00000003811	plxnb2a	1.17552	0.00367393	-0.021357	0.999799
ENSDARG00000003818	prkag1	-0.689002	0.403371	-0.313881	0.999799
ENSDARG00000003820	nr1d2a	0.673598	0.235613	-0.113727	0.999799
ENSDARG00000003822	ankrd16	0.456716	0.636851	0.0075418	0.999799
ENSDARG00000003827	snapc1b	-0.509133	0.600498	-0.238138	0.999799
ENSDARG00000003829	galnt2	0.00579049	0.99387	0.21699	0.999799
ENSDARG00000003835	stom	0.311258	0.786377	0.269857	0.999799
ENSDARG00000003841	usb1	-0.769755	#N/A	1.3237	0.999799
ENSDARG00000003845	chm	-2.66774	#N/A	5.87948	0.999799
ENSDARG00000003846	mrpl21	-0.391833	0.802337	-0.358195	0.999799
ENSDARG00000003854	acsl1b	-0.796436	0.104304	0.29187	0.999799
ENSDARG00000003860	cbx3a	-0.419729	0.596666	0.106296	0.999799
ENSDARG00000003865	pard6b	-0.407065	0.467669	-0.0528504	0.999799
ENSDARG00000003866	tm9sf2	0.260496	0.77461	-0.194071	0.999799
ENSDARG00000003867	cdk20	0.454437	0.804187	0.0700211	0.999799
ENSDARG00000003869	decr1	0.767537	0.496558	-0.233558	0.999799
ENSDARG00000003872	ccdc102a	-1.0548	0.113563	0.374864	0.999799
ENSDARG00000003899	zdhhc23b	1.30722	0.467365	-0.928139	0.999799
ENSDARG00000003900	gpr61l	2.52467	0.00049933	-0.396978	0.999799
ENSDARG00000003902	ctsl.1	1.24057	0.179948	0.274544	0.999799
ENSDARG00000003903	hapln2	0.75527	0.517142	-0.51473	0.999799
ENSDARG00000003904	sycp1	-0.675711	#N/A	-0.820848	0.999799
ENSDARG00000003909	ftr01	-0.89844	#N/A	0.63198	0.999799
ENSDARG00000003910	med13b	-0.570322	0.121261	0.313872	0.999799
ENSDARG00000003920	setb	-0.687535	0.115788	0.420688	0.999799
ENSDARG00000003925	cx28.6	-1.71704	#N/A	2.0347	0.999799
ENSDARG00000003927	cldn12	0.130042	0.924864	-0.705239	0.999799
ENSDARG00000003931	cndp2	0.581393	0.550855	-0.0245105	0.999799
ENSDARG00000003934	nxnl2	-0.0812206	0.954451	-0.241368	0.999799
ENSDARG00000003938	rpa1	-0.867466	0.223418	0.0233732	0.999799
ENSDARG00000003940	mtfr1l	-0.329769	0.699714	0.188381	0.999799
ENSDARG00000003941	rrs1	0.376864	#N/A	0.220496	0.999799
ENSDARG00000003944	nmur1b	1.22908	#N/A	-0.125183	0.999799
ENSDARG00000003952	pfn2	-0.481061	0.365053	0.297369	0.999799
ENSDARG00000003961	parp3	0.573932	0.167973	-0.24892	0.999799
ENSDARG00000003963	traf4a	0.127169	0.845296	0.380971	0.999799
ENSDARG00000003965	tlx1	-0.172225	0.885687	-0.331348	0.999799
ENSDARG00000003970	trim35-13	1.28729	#N/A	-2.21295	0.999799
ENSDARG00000003971	isl2a	-0.604556	0.236347	-0.333148	0.999799
ENSDARG00000003973	chordc1a	0.213619	0.857076	-0.336682	0.999799
ENSDARG00000003974	spoplb	-0.699356	0.394812	-0.0564687	0.999799
ENSDARG00000003984	si:dkey-175g6.5	0.888001	#N/A	0.697899	0.999799
ENSDARG00000003989	crhr1	0.803664	0.399201	0.189339	0.999799
ENSDARG00000003991	fhl2b	1.23088	#N/A	-1.14594	0.999799
ENSDARG00000003994	syt9a	0.486453	#N/A	-0.293332	0.999799
ENSDARG00000003998	phyhipla	0.328501	0.764348	-0.000494056	0.999799
ENSDARG00000004015	adcyap1a	0.455815	#N/A	-0.485807	0.999799
ENSDARG00000004017	spag1a	0.316631	0.423095	0.431432	0.999799
ENSDARG00000004018	si:ch211-236h17.3	-0.828643	0.0241903	0.0258028	0.999799
ENSDARG00000004023	isl1	-0.673633	0.722837	0.0477513	0.999799
ENSDARG00000004034	arhgdig	0.316504	0.763298	0.400282	0.999799
ENSDARG00000004037	cog2	-0.642773	0.414428	-0.0190561	0.999799
ENSDARG00000004046	phf6	-0.689476	0.118822	0.0828246	0.999799
ENSDARG00000004049	marcksa	-0.485503	0.467365	0.290462	0.999799
ENSDARG00000004051		1.62495	#N/A	0.879345	0.999799
ENSDARG00000004055	uhrf1bp1l	0.527484	0.72719	-0.316521	0.999799
ENSDARG00000004059	galk2	1.25079	#N/A	-0.322623	0.999799
ENSDARG00000004060	bhlhe40	0.401525	0.360753	0.117227	0.999799
ENSDARG00000004074	bach2b	-0.640594	0.082251	0.432859	0.999799
ENSDARG00000004078	acsl4a	-0.653514	0.0615006	-0.17784	0.999799
ENSDARG00000004082	cx39.9	0.460005	0.793802	-0.0702344	0.999799
ENSDARG00000004094	acsbg2	-1.04279	1.13074e-05	0.280633	0.999799
ENSDARG00000004105	tie1	-0.348853	#N/A	0.64254	0.999799
ENSDARG00000004111	esr1	0.517148	0.659448	-0.0354837	0.999799
ENSDARG00000004115	mgat4b	0.708194	0.71687	0.364504	0.999799
ENSDARG00000004131	rttn	-0.258163	0.758307	-0.003304	0.999799
ENSDARG00000004132	usp19	-0.0919201	0.941616	0.177823	0.999799
ENSDARG00000004141	zgc:92630	0.105876	#N/A	-0.23871	0.999799
ENSDARG00000004150	grm2a	0.882288	0.486588	0.219787	0.999799
ENSDARG00000004158	tmem63c	0.57277	#N/A	-1.27831	0.999799
ENSDARG00000004160	reep3b	-0.439936	#N/A	0.147903	0.999799
ENSDARG00000004167	zgc:110366	-0.305651	0.745013	0.0649922	0.999799
ENSDARG00000004169	stmn1a	-0.427434	0.37405	-0.414145	0.999799
ENSDARG00000004171	rabac1	0.345545	#N/A	1.20584	0.999799
ENSDARG00000004173	copa	-1.13723	0.028255	0.692133	0.999799
ENSDARG00000004174	cnot1	0.0274194	0.980136	0.381422	0.999799
ENSDARG00000004176	ulk4	-0.370113	0.63857	-0.259046	0.999799
ENSDARG00000004184	nf1b	1.43931	3.58347e-08	-0.116537	0.999799
ENSDARG00000004187	zgc:122979	-0.315801	0.697123	0.694337	0.999799
ENSDARG00000004189	cbx1a	-0.943838	0.084131	0.0432856	0.999799
ENSDARG00000004196	tnfsf10l	0.124742	0.944776	0.00852605	0.999799
ENSDARG00000004199	spam1	0.689993	#N/A	-0.332109	0.999799
ENSDARG00000004204	efhc2	-0.64574	#N/A	0.57607	0.999799
ENSDARG00000004211	ccdc106a	0.0102823	0.9939	0.342915	0.999799
ENSDARG00000004218	rnd1b	-0.418233	0.606552	0.211998	0.999799
ENSDARG00000004219	slc6a3	1.35564	#N/A	-1.52261	0.999799
ENSDARG00000004227	pde3a	0.0907872	0.934107	0.064928	0.999799
ENSDARG00000004232	dlb	-0.682057	#N/A	1.05933	0.999799
ENSDARG00000004243	asic4b	1.54742	0.0817603	-0.529672	0.999799
ENSDARG00000004246	slit2	0.266662	0.857963	0.0960758	0.999799
ENSDARG00000004251	dhfr	-0.634906	0.284268	0.197212	0.999799
ENSDARG00000004256	wnt11	-0.813625	0.033408	0.430475	0.999799
ENSDARG00000004260	cul5b	-0.0971195	0.95633	-0.567088	0.999799
ENSDARG00000004261	tmed9	-0.637263	0.360617	0.520343	0.999799
ENSDARG00000004262	cyp46a1.2	-0.214073	0.852328	-0.35267	0.999799
ENSDARG00000004270	atl3	0.276485	0.697123	0.274465	0.999799
ENSDARG00000004280	seh1l	1.8304	#N/A	-0.443311	0.999799
ENSDARG00000004282	zgc:77375	0.0208935	0.981663	0.102759	0.999799
ENSDARG00000004291	hecw1b	0.0490877	#N/A	0.515212	0.999799
ENSDARG00000004296	ambp	-0.54272	0.529788	-0.284256	0.999799
ENSDARG00000004297	irf2bpl	-0.332751	0.436486	0.358712	0.999799
ENSDARG00000004301	rhogb	0.348998	0.637729	0.39362	0.999799
ENSDARG00000004302	slc45a1	-0.456226	0.811206	0.152931	0.999799
ENSDARG00000004305	vangl1	0.827054	0.555004	0.000351178	0.999799
ENSDARG00000004306	klhl18	0.594222	0.598404	0.24409	0.999799
ENSDARG00000004307	lypd6	0.582624	#N/A	-0.244583	0.999799
ENSDARG00000004308	fam8a1b	-0.18184	0.924705	-0.511383	0.999799
ENSDARG00000004311	ldlrap1a	0.369731	0.821265	-0.385642	0.999799
ENSDARG00000004318	cbwd	-0.186697	#N/A	0.224827	0.999799
ENSDARG00000004322	ush1ga	0.126475	0.942907	-0.422534	0.999799
ENSDARG00000004325	casp9	-0.260904	0.887354	-0.125141	0.999799
ENSDARG00000004328	si:ch1073-284b18.2	-0.696259	0.328205	-1.08168	0.999799
ENSDARG00000004336	exoc4	-0.852932	0.160997	1.10478	0.999799
ENSDARG00000004343	nelfe	0.608666	0.679434	0.254856	0.999799
ENSDARG00000004358	gnb3a	-0.340926	#N/A	1.48139	0.999799
ENSDARG00000004363	lhfpl6	-0.273342	0.803967	-0.375223	0.999799
ENSDARG00000004372	fmnl3	0.0695237	0.9524	-0.0200069	0.999799
ENSDARG00000004377	ppp1r13ba	-0.143674	0.867584	0.00481818	0.999799
ENSDARG00000004378	yrk	-0.706346	0.400322	-0.149357	0.999799
ENSDARG00000004386	si:dkey-153k10.9	0.209374	0.892511	0.278613	0.999799
ENSDARG00000004392	hdr	-2.41172	7.73457e-10	-0.189322	0.999799
ENSDARG00000004396	b3gnt5b	-0.412673	#N/A	-0.0610963	0.999799
ENSDARG00000004402	elovl6	-0.173573	0.756102	-0.138124	0.999799
ENSDARG00000004405	snx10a	0.97006	0.621939	0.127177	0.999799
ENSDARG00000004406	spra	-0.354954	0.803145	0.238692	0.999799
ENSDARG00000004415	tcf7l2	-0.385161	0.503452	0.0290885	0.999799
ENSDARG00000004427	dpy30	-0.695908	0.3599	-0.372898	0.999799
ENSDARG00000004433	btk	-0.447086	0.593522	0.132018	0.999799
ENSDARG00000004436	fam92a1	0.920792	0.132195	0.058615	0.999799
ENSDARG00000004445	grm5a	0.103309	#N/A	-0.269641	0.999799
ENSDARG00000004447	aplnr2	0.983357	0.242289	0.637081	0.999799
ENSDARG00000004451	tnfrsfa	0.332636	0.658798	0.267044	0.999799
ENSDARG00000004452	tardbpl	-0.570021	0.772548	-0.00886798	0.999799
ENSDARG00000004455	p2rx5	0.76006	0.331028	0.0646905	0.999799
ENSDARG00000004459	unc119.2	-2.72666	0.0030289	0.308024	0.999799
ENSDARG00000004460	desi2	1.0707	0.0444601	-0.784762	0.999799
ENSDARG00000004470	prkcsh	-0.172984	0.818425	0.272539	0.999799
ENSDARG00000004472	atat1	0.0335112	0.979785	-0.398268	0.999799
ENSDARG00000004492	pcyt1ab	0.0479375	0.958035	-0.51494	0.999799
ENSDARG00000004497	tspan33a	-1.42544	#N/A	0.737162	0.999799
ENSDARG00000004502	rcor3	0.131771	0.942401	0.125198	0.999799
ENSDARG00000004517	ppat	3.03202	9.1177e-05	-0.14766	0.999799
ENSDARG00000004525	zgc:63882	-0.0672318	0.949939	-0.423261	0.999799
ENSDARG00000004527	pin4	0.101274	#N/A	0.156163	0.999799
ENSDARG00000004529	zgc:173742	-0.109842	0.929694	0.400167	0.999799
ENSDARG00000004537	kmt2a	-0.278321	0.608219	0.439943	0.999799
ENSDARG00000004539	ptgs2a	1.82827	#N/A	0.8411	0.999799
ENSDARG00000004561	prkcg	0.579913	#N/A	-0.119215	0.999799
ENSDARG00000004574	gtf3c2	-0.277232	0.710396	0.0373297	0.999799
ENSDARG00000004576	plk4	-0.109613	0.955605	0.163774	0.999799
ENSDARG00000004577	zgc:194665	-0.0492742	0.979046	0.0367864	0.999799
ENSDARG00000004580	nmnat2	0.334954	0.817379	-0.123117	0.999799
ENSDARG00000004587	kat5a	-0.207592	0.914863	0.6817	0.999799
ENSDARG00000004588	sox4a	0.759992	0.101121	0.360007	0.999799
ENSDARG00000004592	gpr22a	0.718899	#N/A	-0.302612	0.999799
ENSDARG00000004594	znf800a	-0.263908	0.843371	0.122548	0.999799
ENSDARG00000004597	lrrc4ba	0.76829	0.600401	-0.782637	0.999799
ENSDARG00000004616	mtmr2	-0.595937	0.616442	0.138889	0.999799
ENSDARG00000004618	stx2a	0.278434	0.712196	-0.152446	0.999799
ENSDARG00000004621	gpm6ab	1.74605	7.7627e-10	0.203377	0.999799
ENSDARG00000004627	panx3	0.248229	0.876117	-0.374842	0.999799
ENSDARG00000004632	egln1b	-0.221118	0.924697	-0.258282	0.999799
ENSDARG00000004633	epn3b	0.527365	#N/A	0.259461	0.999799
ENSDARG00000004634	osbp	0.0363951	0.976014	-0.356051	0.999799
ENSDARG00000004635	epha7	-0.977531	0.0196783	-0.0105525	0.999799
ENSDARG00000004636	ccdc9	0.521436	0.696584	0.357501	0.999799
ENSDARG00000004643	cdhr1a	0.712218	#N/A	0.204917	0.999799
ENSDARG00000004647	spice1	0.111788	#N/A	-0.780338	0.999799
ENSDARG00000004648	kctd16a	0.414157	0.811288	0.283104	0.999799
ENSDARG00000004672	ptk2ab	-0.210569	0.751776	-0.0781079	0.999799
ENSDARG00000004680	dnajb6a	-0.434154	0.49241	-0.426462	0.999799
ENSDARG00000004687	acaa1	0.65399	0.60233	-0.293197	0.999799
ENSDARG00000004692	nabp1a	0.403692	0.264439	0.130583	0.999799
ENSDARG00000004695	six4a	-0.368106	0.67111	-0.165198	0.999799
ENSDARG00000004696	eefsec	0.328268	0.803967	0.660042	0.999799
ENSDARG00000004697	rxrgb	-1.14383	0.00836661	0.0602008	0.999799
ENSDARG00000004702	irf2bp2a	-0.680565	0.00368425	0.531131	0.999799
ENSDARG00000004706	syf2	-0.34257	0.834178	-0.0561752	0.999799
ENSDARG00000004712	tbr1b	0.405461	0.758275	-0.371789	0.999799
ENSDARG00000004714	tcf12	0.330185	0.259746	0.0925505	0.999799
ENSDARG00000004721	mpp5b	-1.03402	#N/A	-0.188264	0.999799
ENSDARG00000004724	tcea3	-0.211171	0.893818	0.0416129	0.999799
ENSDARG00000004726	trappc11	-0.185977	0.885132	0.0508867	0.999799
ENSDARG00000004727	cmss1	-0.283366	0.869787	0.691485	0.999799
ENSDARG00000004735	hnrnpub	-0.363779	0.65145	-0.209085	0.999799
ENSDARG00000004745	lmbr1l	0.610798	0.65039	0.173567	0.999799
ENSDARG00000004748	zgc:100868	-0.314095	#N/A	-0.00286845	0.999799
ENSDARG00000004753	mylkb	0.425336	0.834385	-0.961922	0.999799
ENSDARG00000004754	hspa4a	-0.592216	0.374533	0.0104076	0.999799
ENSDARG00000004757	ybx1	0.0138888	0.983346	0.187934	0.999799
ENSDARG00000004771	ankrd10b	-0.331232	0.406792	0.186978	0.999799
ENSDARG00000004774	wdr36	0.31458	0.83292	-0.208414	0.999799
ENSDARG00000004782	fgfr3	0.358373	#N/A	-0.353688	0.999799
ENSDARG00000004785	cops2	0.787872	#N/A	-0.15455	0.999799
ENSDARG00000004794	ccdc146	0.923427	0.598739	-0.617329	0.999799
ENSDARG00000004796	mgrn1b	-0.259526	0.796063	0.285774	0.999799
ENSDARG00000004823	asz1	0.300033	#N/A	0.13015	0.999799
ENSDARG00000004830	flot2a	0.179257	0.7852	0.18218	0.999799
ENSDARG00000004836	dnajc5ab	0.100998	0.915157	-0.0691168	0.999799
ENSDARG00000004840	rassf1	-1.0227	0.00267407	0.155371	0.999799
ENSDARG00000004843	foxp1a	-0.377235	0.534838	-0.119408	0.999799
ENSDARG00000004851	hinfp	0.171306	0.893269	0.180918	0.999799
ENSDARG00000004861	esrrga	0.00849404	#N/A	-0.371835	0.999799
ENSDARG00000004866	rfx5	0.456427	#N/A	-0.442909	0.999799
ENSDARG00000004866	mindy1	0.456427	#N/A	-0.442909	0.999799
ENSDARG00000004869	penka	0.348064	0.741931	-0.425109	0.999799
ENSDARG00000004870	psen1	0.418079	0.698559	-0.132151	0.999799
ENSDARG00000004871	mst1rb	0.820359	0.590776	-0.0321715	0.999799
ENSDARG00000004874	spata6l	-0.0119812	#N/A	-0.041966	0.999799
ENSDARG00000004875	tmc6b	-0.369971	0.616626	0.299153	0.999799
ENSDARG00000004877	rock2b	0.658297	0.586719	0.338613	0.999799
ENSDARG00000004880	acsm3	0.342821	#N/A	0.0896602	0.999799
ENSDARG00000004889	aga	0.232551	0.862675	0.0574504	0.999799
ENSDARG00000004891	pex19	0.43601	#N/A	0.220646	0.999799
ENSDARG00000004898	zp2l2	0.312128	0.876493	-0.317529	0.999799
ENSDARG00000004904	gys2	-2.72282	#N/A	1.99652	0.999799
ENSDARG00000004906	stip1	-0.0552001	0.949939	0.135843	0.999799
ENSDARG00000004925	immp2l	-0.27467	#N/A	0.303122	0.999799
ENSDARG00000004930	lmo7a	1.02494	0.00279776	0.086177	0.999799
ENSDARG00000004931	slc8a3	0.301691	0.718252	0.559954	0.999799
ENSDARG00000004932	anos1b	-0.91841	#N/A	1.15932	0.999799
ENSDARG00000004937	skp2	-0.646503	0.094736	0.594084	0.999799
ENSDARG00000004939	mtdhb	-0.542675	0.499115	0.0226417	0.999799
ENSDARG00000004948	bccip	0.10977	0.904095	0.0377032	0.999799
ENSDARG00000004952	rsad2	-1.47089	#N/A	0.647232	0.999799
ENSDARG00000004953	mxb	0.667475	0.493215	-0.0290665	0.999799
ENSDARG00000004954	grna	0.683505	#N/A	0.451672	0.999799
ENSDARG00000004964	cyp4t8	-0.181818	#N/A	-0.13636	0.999799
ENSDARG00000004979	elovl5	0.175296	#N/A	-0.224786	0.999799
ENSDARG00000004988	ppp3ca	0.720026	0.655246	0.468126	0.999799
ENSDARG00000005002	brf1b	0.16362	0.894156	0.93442	0.999799
ENSDARG00000005004	slc5a12	0.657884	#N/A	0.220002	0.999799
ENSDARG00000005010	si:dkeyp-2e4.8	1.60648	#N/A	0.0971388	0.999799
ENSDARG00000005015	tspy	-0.439387	0.417619	0.416773	0.999799
ENSDARG00000005023	fkbp9	-0.116956	0.954451	-0.494286	0.999799
ENSDARG00000005026	tshz1	0.363968	0.764348	-0.0440236	0.999799
ENSDARG00000005034	ispd	0.410531	0.728029	0.207641	0.999799
ENSDARG00000005049	rab20	0.876956	#N/A	0.395162	0.999799
ENSDARG00000005050	wnt2ba	0.675043	0.541131	-0.763587	0.999799
ENSDARG00000005058	ncapd2	-0.664563	0.532027	-0.0801525	0.999799
ENSDARG00000005078	eif4e3	0.23456	0.857848	0.373356	0.999799
ENSDARG00000005085	ggctb	0.517527	0.65145	-0.497171	0.999799
ENSDARG00000005092	cep89	0.380117	0.855597	0.431563	0.999799
ENSDARG00000005095	glcea	0.0794424	0.956229	0.828798	0.999799
ENSDARG00000005098	zgc:86764	-0.217691	0.857076	0.0279626	0.999799
ENSDARG00000005104	limk2	-0.542917	0.613268	0.0255812	0.999799
ENSDARG00000005112	cdh17	0.265453	#N/A	0.138319	0.999799
ENSDARG00000005115	calub	-0.446925	0.201864	0.33553	0.999799
ENSDARG00000005122	atp2a2b	-0.239259	0.665505	0.493883	0.999799
ENSDARG00000005126	large1	0.455245	0.456769	-0.119898	0.999799
ENSDARG00000005128	rnaseh2b	0.0735137	0.955114	-0.602612	0.999799
ENSDARG00000005134	psmd11b	-0.741562	0.0577014	0.402979	0.999799
ENSDARG00000005141	camkvb	0.454802	0.742146	-0.597172	0.999799
ENSDARG00000005150	tbx20	0.149712	0.893374	-0.217218	0.999799
ENSDARG00000005154	aspa	0.799611	0.0833991	-0.0581124	0.999799
ENSDARG00000005162	tpm3	0.987392	0.533129	-0.502655	0.999799
ENSDARG00000005172	dynll2b	-0.126919	0.856337	-0.0674438	0.999799
ENSDARG00000005176	zgc:101040	0.529167	0.738799	0.0423098	0.999799
ENSDARG00000005179	dglucy	0.311806	0.811288	0.152056	0.999799
ENSDARG00000005185	cpn1	-0.400973	0.555044	-0.272311	0.999799
ENSDARG00000005186	sp4	-0.884108	0.000100425	0.320613	0.999799
ENSDARG00000005191	ahcy	-0.781859	0.0151762	0.385829	0.999799
ENSDARG00000005210	coro2a	-0.245162	0.674114	0.234519	0.999799
ENSDARG00000005216	zgc:158328	-0.312042	0.817379	-0.23555	0.999799
ENSDARG00000005218	wrnip1	-0.00512019	0.996969	-0.34656	0.999799
ENSDARG00000005220	pdcd6	0.750648	0.00881294	-0.162121	0.999799
ENSDARG00000005221	desmb	0.998129	0.811222	-0.364351	0.999799
ENSDARG00000005230	ssr2	0.150986	0.899065	-0.300075	0.999799
ENSDARG00000005232	ccdc85ca	0.871462	0.594326	-0.0297999	0.999799
ENSDARG00000005236	srcap	-0.365417	0.587753	0.167402	0.999799
ENSDARG00000005246	asb3	0.220005	0.898208	-0.272584	0.999799
ENSDARG00000005251	rpe	0.482915	0.437362	-0.14769	0.999799
ENSDARG00000005254	kdelr2a	-0.584163	0.495074	-0.192515	0.999799
ENSDARG00000005271	zc3h12a	1.07611	0.413901	-0.5175	0.999799
ENSDARG00000005274	rad52	0.778651	#N/A	-0.672281	0.999799
ENSDARG00000005284	fbxl15	0.88437	#N/A	-0.374826	0.999799
ENSDARG00000005314	si:dkeyp-80c12.5	-2.35866	#N/A	3.04866	0.999799
ENSDARG00000005315	celf1	-0.665934	0.112182	0.319038	0.999799
ENSDARG00000005318	stam2	0.581544	#N/A	0.217369	0.999799
ENSDARG00000005320	nipsnap1	-0.130039	0.954451	-0.718107	0.999799
ENSDARG00000005327	ftr66	-0.258746	#N/A	1.34794	0.999799
ENSDARG00000005332	lipib	-0.776217	0.674416	-0.255802	0.999799
ENSDARG00000005335	slc22a4	0.823587	#N/A	0.434509	0.999799
ENSDARG00000005343	ccdc85al	0.518734	#N/A	-0.162223	0.999799
ENSDARG00000005350	dip2ba	0.186002	0.872144	0.467225	0.999799
ENSDARG00000005355	larp6a	0.492523	0.240916	-0.0786088	0.999799
ENSDARG00000005359	sucla2	-0.37277	0.628926	0.292601	0.999799
ENSDARG00000005364	grin3ba	0.547375	0.722837	0.114021	0.999799
ENSDARG00000005368	mcamb	-1.20021	0.0794637	0.390062	0.999799
ENSDARG00000005371	gprc6a	-0.106622	#N/A	0.25252	0.999799
ENSDARG00000005372	camk4	0.682328	#N/A	-0.315326	0.999799
ENSDARG00000005374	tubgcp4	0.66194	#N/A	0.128624	0.999799
ENSDARG00000005382	prdm9	0.595763	0.668286	-0.733569	0.999799
ENSDARG00000005394	dnmt3aa	2.61081	#N/A	-1.16168	0.999799
ENSDARG00000005397	trim3b	0.0891048	0.856018	-0.0451569	0.999799
ENSDARG00000005414	grapa	-0.545558	0.555044	0.132253	0.999799
ENSDARG00000005416	map3k5	0.017944	0.978509	-0.266656	0.999799
ENSDARG00000005423	pgam1a	-0.25971	0.622487	0.214346	0.999799
ENSDARG00000005425	wdfy1	0.224884	0.828477	-0.106622	0.999799
ENSDARG00000005448	mtfmt	-0.171514	0.893239	0.16224	0.999799
ENSDARG00000005451	gdi2	-0.187305	0.669059	0.316359	0.999799
ENSDARG00000005453	foxp2	0.704504	0.166788	-0.511977	0.999799
ENSDARG00000005454	tacc3	-1.01426	0.302368	0.352387	0.999799
ENSDARG00000005456	katnb1	-0.765213	0.196676	-0.256459	0.999799
ENSDARG00000005458	csnk1g2a	0.195143	0.818498	-0.0982574	0.999799
ENSDARG00000005462	kif4	-0.187977	0.888907	-0.0297439	0.999799
ENSDARG00000005463	slc30a1a	0.280409	0.606552	0.0568748	0.999799
ENSDARG00000005464	dnase1l1	0.620785	0.322351	0.230874	0.999799
ENSDARG00000005468	irf2bp1	0.149988	0.848482	0.0113531	0.999799
ENSDARG00000005476	nav3	0.515654	0.472421	0.208213	0.999799
ENSDARG00000005479	tenm3	0.382507	0.885743	-0.782411	0.999799
ENSDARG00000005481	nfkbiaa	0.212842	0.755322	0.473761	0.999799
ENSDARG00000005482	rapgef2	1.74569	2.05785e-06	-0.0586248	0.999799
ENSDARG00000005485	ucmab	1.07923	0.47413	-0.241363	0.999799
ENSDARG00000005500	dgcr6	0.705786	#N/A	0.400845	0.999799
ENSDARG00000005510	gdf6b	-0.145253	0.942138	-0.422471	0.999799
ENSDARG00000005513	naca	-0.708664	0.235613	-0.0077496	0.999799
ENSDARG00000005518	slc5a9	-0.542112	#N/A	1.00845	0.999799
ENSDARG00000005522	galr1a	1.6399	0.178085	-0.129644	0.999799
ENSDARG00000005525	acy3.2	1.21432	0.0456562	0.0352638	0.999799
ENSDARG00000005526	igfn1.1	4.50956	#N/A	-0.0402052	0.999799
ENSDARG00000005536	ubr7	0.218763	0.901591	-0.340792	0.999799
ENSDARG00000005540	xpo7	-0.195879	0.796166	-0.271892	0.999799
ENSDARG00000005541	wif1	-0.606211	0.528866	-0.414154	0.999799
ENSDARG00000005544	btbd3a	0.512934	0.689453	0.289159	0.999799
ENSDARG00000005547	rint1	-0.762946	0.663922	-0.0840866	0.999799
ENSDARG00000005549	znf710b	0.180638	0.854898	0.131477	0.999799
ENSDARG00000005551	hnrnph1l	0.0959243	0.963747	0.382978	0.999799
ENSDARG00000005559	pou4f1	0.468406	0.825359	0.207501	0.999799
ENSDARG00000005560	ywhah	-0.011747	0.988533	0.146234	0.999799
ENSDARG00000005561	gfm2	-0.0438214	0.963248	-0.0570469	0.999799
ENSDARG00000005574	vsx2	0.922415	0.452457	-1.64869	0.999799
ENSDARG00000005576	mphosph8	-0.200121	0.724325	0.048295	0.999799
ENSDARG00000005586	zbtb20	0.373992	0.4359	0.359934	0.999799
ENSDARG00000005590	mtf2	-0.421197	0.610108	-0.152143	0.999799
ENSDARG00000005593	rxrga	-0.412423	0.631349	-0.338641	0.999799
ENSDARG00000005595	adgb	0.708386	0.610533	-0.0809607	0.999799
ENSDARG00000005606	paxip1	-0.49692	0.593522	-0.253556	0.999799
ENSDARG00000005612	aph1b	0.458089	0.701598	-0.0958237	0.999799
ENSDARG00000005619	nek2	-0.52165	0.262733	0.0142984	0.999799
ENSDARG00000005626	si:ch211-133l11.10	-0.502778	0.665047	-0.471277	0.999799
ENSDARG00000005627	zmp:0000000527	-0.0821568	0.966823	0.0452495	0.999799
ENSDARG00000005640	adat3	-0.507131	0.664154	-0.10067	0.999799
ENSDARG00000005643	gcat	-0.624805	0.328559	-0.250565	0.999799
ENSDARG00000005645	robo3	-0.219701	0.773481	-0.181125	0.999799
ENSDARG00000005648	olfml2a	0.0107511	#N/A	0.0754581	0.999799
ENSDARG00000005651	hrasb	-0.222545	0.866757	-0.597393	0.999799
ENSDARG00000005652	man1a1	-0.202834	0.671897	-0.107374	0.999799
ENSDARG00000005670	ttbk2a	0.333467	#N/A	-0.756498	0.999799
ENSDARG00000005673	f3b	-0.214044	0.758391	0.107749	0.999799
ENSDARG00000005675	sec61a1l	-0.273965	0.59701	0.20997	0.999799
ENSDARG00000005679	trip10a	1.15351	0.487005	-0.213953	0.999799
ENSDARG00000005699	ddx19	-0.142454	0.918963	0.133202	0.999799
ENSDARG00000005704	eps8l3b	1.80727	#N/A	-0.448639	0.999799
ENSDARG00000005713	ethe1	0.277658	0.750367	-0.0662376	0.999799
ENSDARG00000005716	olfml2ba	-0.595302	#N/A	0.558203	0.999799
ENSDARG00000005739	gpm6ba	-0.679327	#N/A	1.38208	0.999799
ENSDARG00000005754	ptprfb	-0.623814	0.125975	-0.0998276	0.999799
ENSDARG00000005762	col14a1a	-0.00860361	0.991664	-0.903414	0.999799
ENSDARG00000005772	tsr2	-1.29795	#N/A	-0.697307	0.999799
ENSDARG00000005774	ddx3xb	0.240517	0.690802	-0.00914223	0.999799
ENSDARG00000005775	scn8aa	-0.0847768	#N/A	0.303578	0.999799
ENSDARG00000005776	guk1b	1.23726	0.268416	-0.420376	0.999799
ENSDARG00000005780	npy8br	0.774376	0.697165	-0.389303	0.999799
ENSDARG00000005783	ncanb	0.199247	#N/A	0.450572	0.999799
ENSDARG00000005786	ppm1f	-0.301474	0.421192	0.155903	0.999799
ENSDARG00000005789	enpp1	0.274002	0.703687	-0.293446	0.999799
ENSDARG00000005791	rpl28	-0.232903	0.922866	-0.324914	0.999799
ENSDARG00000005799	smim14	1.08162	0.048447	0.596634	0.999799
ENSDARG00000005800	ampd3a	0.65511	0.414428	0.742206	0.999799
ENSDARG00000005814	klhl10a	1.27689	#N/A	-0.134084	0.999799
ENSDARG00000005821	ncf2	0.477596	0.781818	0.141646	0.999799
ENSDARG00000005823	slc39a10	0.209681	0.712338	0.394614	0.999799
ENSDARG00000005827	eif2s1a	-0.24431	0.859343	0.385786	0.999799
ENSDARG00000005828	faima	-0.280697	#N/A	1.23049	0.999799
ENSDARG00000005834	gatad2b	0.0119779	0.983346	0.45561	0.999799
ENSDARG00000005840	got2b	1.03196	#N/A	-0.502154	0.999799
ENSDARG00000005842	cd9a	0.973226	0.303912	0.2509	0.999799
ENSDARG00000005846		-1.01144	#N/A	0.808513	0.999799
ENSDARG00000005853	slc25a6	0.669023	#N/A	-0.655487	0.999799
ENSDARG00000005861	ralgapa2	-0.136415	0.861285	-0.00618732	0.999799
ENSDARG00000005867	gon4l	0.188231	0.869025	0.0005042	0.999799
ENSDARG00000005870	mmadhc	0.258103	0.901245	0.0110507	0.999799
ENSDARG00000005883	rfx1a	-0.644257	0.0623325	0.100499	0.999799
ENSDARG00000005891	cyb5r3	0.100528	0.929119	-0.142905	0.999799
ENSDARG00000005894	slc7a9	-0.21908	0.885687	-0.10447	0.999799
ENSDARG00000005897	dera	3.45065	0.000434735	-1.30187	0.999799
ENSDARG00000005908	clk4b	0.247938	0.823149	-0.225317	0.999799
ENSDARG00000005915	tcf3a	-0.429157	0.120844	0.122613	0.999799
ENSDARG00000005916	srpk3	-1.25339	0.0606838	-0.343936	0.999799
ENSDARG00000005924	serpina10a	0.726082	0.381193	-0.0754356	0.999799
ENSDARG00000005927	tbc1d17	0.272771	0.712196	-0.11955	0.999799
ENSDARG00000005941	clul1	0.892685	0.000811039	-0.126635	0.999799
ENSDARG00000005941	yes1	0.892685	0.000811039	-0.126635	0.999799
ENSDARG00000005942	v2rl1	-0.777677	0.574371	-0.175443	0.999799
ENSDARG00000005945	sart1	0.0636016	0.958696	0.289128	0.999799
ENSDARG00000005948	ankmy2a	0.131925	#N/A	-0.244323	0.999799
ENSDARG00000005972	ric8b	0.124954	0.934972	-0.164633	0.999799
ENSDARG00000005980	sfswap	-0.178149	0.912162	0.184876	0.999799
ENSDARG00000005989	rgl1	-0.194464	0.809496	0.12462	0.999799
ENSDARG00000005993	prc1b	-0.444212	0.592171	-0.039041	0.999799
ENSDARG00000006003	mycla	-0.673552	0.0594897	0.219862	0.999799
ENSDARG00000006008	dct	0.963761	#N/A	0.203001	0.999799
ENSDARG00000006010	bmi1a	-0.0400185	0.97003	-0.296344	0.999799
ENSDARG00000006011	klhl42	0.628961	0.60861	0.269386	0.999799
ENSDARG00000006019	tktb	-0.760061	0.0328922	0.240172	0.999799
ENSDARG00000006025	tp53i11b	0.950901	0.269603	-0.22435	0.999799
ENSDARG00000006029	lta4h	-0.790109	0.0765945	0.349482	0.999799
ENSDARG00000006031	abat	0.0382791	0.973038	-0.0527405	0.999799
ENSDARG00000006038	aebp2	-0.385614	0.587409	0.112376	0.999799
ENSDARG00000006040	cyp20a1	0.95526	0.318803	-0.122233	0.999799
ENSDARG00000006044	ust	0.737576	0.212298	-0.199324	0.999799
ENSDARG00000006052	malt2	0.0872494	0.966823	0.323607	0.999799
ENSDARG00000006060	crybg1b	-0.917287	0.590921	-0.0448576	0.999799
ENSDARG00000006062	akap1b	0.455597	0.667872	-0.056054	0.999799
ENSDARG00000006065	znf385b	0.555524	0.131003	0.17526	0.999799
ENSDARG00000006074	uck2a	-0.914535	0.0444563	0.252171	0.999799
ENSDARG00000006079	gpr37l1a	-0.207344	0.895408	1.00712	0.999799
ENSDARG00000006092	rad21a	0.988589	#N/A	-1.66415	0.999799
ENSDARG00000006093	cdk15	0.624847	0.657266	-0.21016	0.999799
ENSDARG00000006094	igf2r	-0.48284	0.288623	0.23565	0.999799
ENSDARG00000006109	pimr185	-0.103237	#N/A	-0.0848879	0.999799
ENSDARG00000006110	chrd	1.05508	0.363014	-0.420333	0.999799
ENSDARG00000006112	myof	1.17322	0.278751	0.312516	0.999799
ENSDARG00000006120	tbx2b	0.32762	#N/A	-0.129201	0.999799
ENSDARG00000006124	kdm5c	-0.0773163	0.942386	-0.0614349	0.999799
ENSDARG00000006125	csnk1db	-0.54951	0.0369006	0.358272	0.999799
ENSDARG00000006128	cep170aa	0.587391	0.139168	0.213035	0.999799
ENSDARG00000006137	star	-0.881164	#N/A	-1.32722	0.999799
ENSDARG00000006151	pde11al	-0.76336	0.0709176	-0.316921	0.999799
ENSDARG00000006169	lrrk2	1.30192	0.112182	-0.714938	0.999799
ENSDARG00000006174	lrrc23	0.957769	#N/A	-1.35004	0.999799
ENSDARG00000006181	hif1aa	0.279457	0.783655	0.040784	0.999799
ENSDARG00000006192	gatad2ab	-0.474421	0.526247	0.113113	0.999799
ENSDARG00000006196	sav1	-0.668119	0.365053	0.346331	0.999799
ENSDARG00000006200	eif4g1a	-0.222566	0.783655	0.0957004	0.999799
ENSDARG00000006202	erbb3a	1.11306	0.210959	-0.027532	0.999799
ENSDARG00000006206	pou4f3	0.0360828	0.980699	0.31078	0.999799
ENSDARG00000006207	gpx1b	-0.643713	0.413059	-0.402605	0.999799
ENSDARG00000006215	akr1b1	1.48925	0.000180386	-0.136832	0.999799
ENSDARG00000006219	gnl3	0.194821	#N/A	-0.154768	0.999799
ENSDARG00000006220	ugt1a7	1.48933	0.00537148	0.0411349	0.999799
ENSDARG00000006220	ugt1a6	1.48933	0.00537148	0.0411349	0.999799
ENSDARG00000006220	ugt1a2	1.48933	0.00537148	0.0411349	0.999799
ENSDARG00000006220	ugt1a1	1.48933	0.00537148	0.0411349	0.999799
ENSDARG00000006220	ugt1ab	1.48933	0.00537148	0.0411349	0.999799
ENSDARG00000006225	ddx39aa	-0.147627	0.798869	0.0796227	0.999799
ENSDARG00000006235	brms1la	-0.292971	0.653883	0.0853339	0.999799
ENSDARG00000006240	slc27a1a	-0.520464	0.783332	-0.566862	0.999799
ENSDARG00000006242	ptp4a1	1.38827	0.0505528	-0.365926	0.999799
ENSDARG00000006251	ell2	1.95639	#N/A	-0.575355	0.999799
ENSDARG00000006253	mier3a	-0.0969688	0.876493	0.0852375	0.999799
ENSDARG00000006257	vldlr	1.73757	0.0451038	0.534693	0.999799
ENSDARG00000006260	tuba8l4	-0.843969	0.022825	0.205504	0.999799
ENSDARG00000006266	stat1a	-0.294602	0.513386	0.352949	0.999799
ENSDARG00000006272	mpp5a	-0.524287	0.585458	-0.251255	0.999799
ENSDARG00000006279	rragd	0.114579	0.920549	-0.0676189	0.999799
ENSDARG00000006283	waslb	-0.344444	0.24224	0.31902	0.999799
ENSDARG00000006288	prdm5	0.490296	0.309766	-0.225208	0.999799
ENSDARG00000006290	ndufs5	-0.488277	0.537422	0.301004	0.999799
ENSDARG00000006292	maats1	0.351137	0.797057	0.490704	0.999799
ENSDARG00000006299	arhgef7a	-0.577691	0.285053	0.0113799	0.999799
ENSDARG00000006300	psmd9	-0.477254	#N/A	0.656387	0.999799
ENSDARG00000006301	raph1a	0.554468	0.334011	0.368311	0.999799
ENSDARG00000006307	shisa4	0.229153	0.871259	0.0331598	0.999799
ENSDARG00000006308	ptpn18	0.584845	0.493941	-0.200453	0.999799
ENSDARG00000006314	itgav	-0.152197	0.850326	0.476246	0.999799
ENSDARG00000006332	snx14	0.122036	0.926504	-0.240158	0.999799
ENSDARG00000006341	tas1r3	0.142123	#N/A	-0.742168	0.999799
ENSDARG00000006345	med17	-0.252137	#N/A	-0.47969	0.999799
ENSDARG00000006350	nkx1.2la	-0.269602	0.808963	0.203295	0.999799
ENSDARG00000006353	itga5	-0.642144	0.207674	-0.332374	0.999799
ENSDARG00000006356	slc18a3a	0.86716	0.165332	0.0808263	0.999799
ENSDARG00000006368	crlf1b	0.872957	0.303901	0.116508	0.999799
ENSDARG00000006370	atp6v1h	0.145472	0.924864	0.310612	0.999799
ENSDARG00000006372	ugt5c2	-0.319689	0.817039	-0.0453752	0.999799
ENSDARG00000006383	stxbp5l	-0.0360116	0.968224	0.475031	0.999799
ENSDARG00000006385	triobpb	-0.650625	0.0136523	0.119508	0.999799
ENSDARG00000006389	smad2	0.55705	0.0598892	0.149615	0.999799
ENSDARG00000006392	exosc9	-0.659671	0.28176	0.381933	0.999799
ENSDARG00000006395	rbm25b	-0.438818	0.798523	0.316261	0.999799
ENSDARG00000006396	nrcama	1.70081	0.193034	-0.648129	0.999799
ENSDARG00000006397	laptm4a	-0.162792	0.809081	-0.262717	0.999799
ENSDARG00000006399	ywhae1	-0.30243	0.599376	0.199913	0.999799
ENSDARG00000006408	hmgb3b	-0.0749626	0.879634	-0.115388	0.999799
ENSDARG00000006409	mapk12b	0.90413	#N/A	-0.216497	0.999799
ENSDARG00000006413	rpl38	0.527802	#N/A	-0.0799731	0.999799
ENSDARG00000006420	atrnl1b	-0.516543	0.470169	0.0369642	0.999799
ENSDARG00000006422	esyt3	-0.196425	0.869652	0.784603	0.999799
ENSDARG00000006427	fabp2	2.32276	1.69025e-08	-0.36124	0.999799
ENSDARG00000006434	polr1e	-0.570733	0.70258	0.173888	0.999799
ENSDARG00000006447	slc19a3a	-0.0957371	#N/A	0.470603	0.999799
ENSDARG00000006456	pdgfrl	1.0905	0.1617	-0.22342	0.999799
ENSDARG00000006467	pcdh8	0.211926	0.864402	-0.675276	0.999799
ENSDARG00000006468	grap2a	0.466961	0.69113	-0.545203	0.999799
ENSDARG00000006474	saxo2	-0.692487	0.100414	-0.146327	0.999799
ENSDARG00000006487	anp32a	-0.693015	0.00988571	0.55915	0.999799
ENSDARG00000006491	agpat9l	0.796384	0.315968	-0.468928	0.999799
ENSDARG00000006494	asb7	-0.451379	0.353306	-0.121147	0.999799
ENSDARG00000006497	rtn1a	0.0539407	0.941288	0.404257	0.999799
ENSDARG00000006514	her6	-0.930584	0.00522695	0.194343	0.999799
ENSDARG00000006522	otop2	1.79096	#N/A	-0.350457	0.999799
ENSDARG00000006524	supt6h	0.844537	0.590921	-0.54791	0.999799
ENSDARG00000006526	fn1b	0.236349	0.841964	-0.578484	0.999799
ENSDARG00000006527	brd3a	-0.589813	0.46062	0.0413227	0.999799
ENSDARG00000006544	c1qtnf6b	-0.0225375	0.988284	0.728356	0.999799
ENSDARG00000006545	rgp1	-0.525422	0.419713	0.566136	0.999799
ENSDARG00000006546	ak4	-0.413076	0.496982	0.537589	0.999799
ENSDARG00000006553	rras	0.19931	0.925437	-0.0886381	0.999799
ENSDARG00000006560	irf4a	-1.25003	#N/A	-0.244887	0.999799
ENSDARG00000006566	nlk1	-0.522508	0.48001	-0.191407	0.999799
ENSDARG00000006567	dus4l	-1.6086	#N/A	0.17332	0.999799
ENSDARG00000006568	kcnmb2	0.609086	#N/A	-0.581099	0.999799
ENSDARG00000006580	cldnd	-0.152361	0.947358	-0.480148	0.999799
ENSDARG00000006584	phf8	-0.634882	0.598769	0.126931	0.999799
ENSDARG00000006585	zmp:0000000529	2.60986	#N/A	-0.724088	0.999799
ENSDARG00000006598	sgk2b	1.68862	0.136246	0.00410176	0.999799
ENSDARG00000006600	lsm14aa	-0.679644	0.328998	0.215049	0.999799
ENSDARG00000006601	kaznb	0.638686	0.210998	-0.306635	0.999799
ENSDARG00000006602	chrna2a	-0.531265	0.393823	-0.424969	0.999799
ENSDARG00000006604	nectin3b	-0.258032	0.730461	-0.359404	0.999799
ENSDARG00000006607	gpr27	0.476933	0.577432	-0.00842385	0.999799
ENSDARG00000006615	hnf1ba	-0.30506	0.82311	0.139358	0.999799
ENSDARG00000006617	napga	-0.735826	0.317659	0.0144415	0.999799
ENSDARG00000006621	pspc1	-0.00826427	#N/A	-0.639997	0.999799
ENSDARG00000006624	ppp2r2ab	0.0805855	0.961564	-0.345409	0.999799
ENSDARG00000006636	slitrk2	0.64742	#N/A	-0.382634	0.999799
ENSDARG00000006639	lnpk	0.364876	0.729401	-0.00139868	0.999799
ENSDARG00000006640	eomesa	0.344541	0.88137	-0.223309	0.999799
ENSDARG00000006642	drg2	-0.315948	#N/A	0.223109	0.999799
ENSDARG00000006666	si:dkeyp-69c1.6	0.316838	0.811288	-0.0796798	0.999799
ENSDARG00000006672	fam49a	-0.815969	0.0124885	0.061307	0.999799
ENSDARG00000006677	ripk1l	0.599107	0.526247	0.398038	0.999799
ENSDARG00000006678	pth2r	1.20015	0.233148	0.0399142	0.999799
ENSDARG00000006683	arhgef6	-0.994047	0.0515342	0.770429	0.999799
ENSDARG00000006691	rpl12	-1.09983	#N/A	1.59313	0.999799
ENSDARG00000006712	wipf2b	-0.483167	#N/A	0.222322	0.999799
ENSDARG00000006719	specc1la	0.306337	0.775707	-0.285201	0.999799
ENSDARG00000006747	tmem178b	-0.183163	0.898109	0.12997	0.999799
ENSDARG00000006754	mllt3	-1.51625	0.000446719	-0.456682	0.999799
ENSDARG00000006757	klhl41b	-0.00537682	0.997661	0.620275	0.999799
ENSDARG00000006758	fam234b	-0.914402	0.212298	-0.133052	0.999799
ENSDARG00000006760	slc24a3	1.38424	#N/A	0.406119	0.999799
ENSDARG00000006766	snd1	0.011858	0.985843	0.23428	0.999799
ENSDARG00000006773	elovl4a	0.0909022	0.94658	-0.210882	0.999799
ENSDARG00000006775	cass4	-0.354609	0.803967	-0.177863	0.999799
ENSDARG00000006782	rb1	-1.30485	0.054457	0.085344	0.999799
ENSDARG00000006786	copz2	-0.270132	0.608549	0.431155	0.999799
ENSDARG00000006791	arntl1a	0.0295225	0.971806	0.310397	0.999799
ENSDARG00000006811	sult1st6	-0.244974	#N/A	0.025265	0.999799
ENSDARG00000006812	wdr26b	-0.392601	0.560332	0.0948861	0.999799
ENSDARG00000006816	gtf2f2b	0.2381	#N/A	0.929126	0.999799
ENSDARG00000006818	urod	-1.83231	0.00066814	0.360393	0.999799
ENSDARG00000006832	galnt9	0.155501	0.909392	-0.417153	0.999799
ENSDARG00000006837	mycn	-0.747077	0.131421	0.347912	0.999799
ENSDARG00000006838	eef1a2	0.353059	#N/A	0.0320716	0.999799
ENSDARG00000006840	gnmt	-0.0223768	0.974998	-0.226746	0.999799
ENSDARG00000006848	parp9	1.2004	#N/A	-0.56268	0.999799
ENSDARG00000006849	asic2	0.88483	#N/A	0.0285628	0.999799
ENSDARG00000006859	nkain1	0.518737	0.748476	-0.0408542	0.999799
ENSDARG00000006862	kifap3b	0.205773	0.873184	0.148572	0.999799
ENSDARG00000006863	si:ch1073-349o24.2	0.746319	0.624196	-0.145152	0.999799
ENSDARG00000006865	glra4a	0.427124	0.753658	0.590676	0.999799
ENSDARG00000006868	trh	1.73946	#N/A	-0.490833	0.999799
ENSDARG00000006869	stx17	0.90937	0.437362	0.46911	0.999799
ENSDARG00000006877	enpp4	-0.821534	0.219624	-0.369803	0.999799
ENSDARG00000006878	phf21aa	-0.487216	0.513759	0.554428	0.999799
ENSDARG00000006891	kcns3a	-0.161775	0.927763	0.265998	0.999799
ENSDARG00000006892	myo3b	2.00638	#N/A	-1.40217	0.999799
ENSDARG00000006894	oprk1	0.269221	#N/A	-0.411061	0.999799
ENSDARG00000006896	lhx6	0.034338	0.980782	-0.314908	0.999799
ENSDARG00000006899	far1	0.636572	0.306102	0.17388	0.999799
ENSDARG00000006900	impdh2	-1.76577	5.86096e-06	-0.0565684	0.999799
ENSDARG00000006911	wnt8b	-1.23697	0.332473	0.731057	0.999799
ENSDARG00000006915	arl8ba	-1.08238	0.0188892	0.493988	0.999799
ENSDARG00000006921	lrp5	-0.219451	0.816342	0.0526586	0.999799
ENSDARG00000006923	cacna1ab	0.249355	0.777181	0.0961098	0.999799
ENSDARG00000006924	fbxo38	0.00961956	0.993609	-0.694645	0.999799
ENSDARG00000006939	tbx16l	-3.30103	3.88299e-05	0.333628	0.999799
ENSDARG00000006944	gdpd3b	0.592857	0.76741	0.173829	0.999799
ENSDARG00000006963	cse1l	-0.317379	0.504625	0.116724	0.999799
ENSDARG00000006978	zak	0.56343	0.771688	1.03958	0.999799
ENSDARG00000006983	celf3b	0.332236	#N/A	0.288911	0.999799
ENSDARG00000007009	hoxa11b	-0.0266941	0.983689	-0.264588	0.999799
ENSDARG00000007024	uox	0.570574	#N/A	-0.752376	0.999799
ENSDARG00000007025	ttc9c	-1.07029	0.0269193	0.419064	0.999799
ENSDARG00000007034	hnrpkl	0.688123	0.00987484	-0.178393	0.999799
ENSDARG00000007040	tmigd1	-0.81587	0.544169	0.0349839	0.999799
ENSDARG00000007045	cnot4a	0.659694	0.457077	-0.613829	0.999799
ENSDARG00000007065	mrps18b	0.0745294	#N/A	-0.298648	0.999799
ENSDARG00000007077	ankrd50l	0.0857901	0.946114	0.0298376	0.999799
ENSDARG00000007081	pias4a	-0.32207	0.451581	0.337651	0.999799
ENSDARG00000007086	aqp10a	-0.0606539	0.97108	-0.62811	0.999799
ENSDARG00000007092	xab2	-0.118537	0.909754	0.0895276	0.999799
ENSDARG00000007097	her13	1.22146	0.224039	-0.449445	0.999799
ENSDARG00000007098	itm2ba	0.267104	#N/A	0.335804	0.999799
ENSDARG00000007099	cx43.4	-0.530354	0.478967	-0.19968	0.999799
ENSDARG00000007108	lipia	-1.12043	0.290801	0.749976	0.999799
ENSDARG00000007125	asb6	-0.351358	0.859343	0.363289	0.999799
ENSDARG00000007127	acat2	-0.268592	0.648874	-0.000246682	0.999799
ENSDARG00000007129	slc6a16a	-0.706687	0.229048	0.00333417	0.999799
ENSDARG00000007135	cnot3a	-0.136659	0.941869	0.064281	0.999799
ENSDARG00000007136	gtf2h4	0.165964	0.944165	0.202741	0.999799
ENSDARG00000007141	psmc3	-1.52011	0.000999439	0.299483	0.999799
ENSDARG00000007149	l1cama	0.314844	0.857076	0.676573	0.999799
ENSDARG00000007151	kcnk2b	-0.0693518	0.965478	0.19375	0.999799
ENSDARG00000007169	itgb1bp1	-0.767938	0.11307	-0.107831	0.999799
ENSDARG00000007171	aig1	-1.28993	0.179557	2.0114	0.999799
ENSDARG00000007172	plxna3	-0.107814	0.932643	-0.312594	0.999799
ENSDARG00000007175	recql	0.366593	0.729099	-0.32105	0.999799
ENSDARG00000007179	sash1a	-0.386213	0.422898	0.427782	0.999799
ENSDARG00000007180	slc30a4	-0.838298	0.339846	0.193887	0.999799
ENSDARG00000007181	nadk2	-0.511114	0.330651	0.137096	0.999799
ENSDARG00000007184	zbtb16a	-1.12954	0.0124165	0.458052	0.999799
ENSDARG00000007186	ppp1r8a	-0.807558	0.3061	0.0796899	0.999799
ENSDARG00000007195	grm2b	0.823301	#N/A	-0.407707	0.999799
ENSDARG00000007196	rae1	1.07728	0.125871	-0.249586	0.999799
ENSDARG00000007198	mta1	-0.565144	0.244487	0.156217	0.999799
ENSDARG00000007199		1.13434	#N/A	-0.483597	0.999799
ENSDARG00000007216	abce1	-0.0598046	0.958843	-0.0503989	0.999799
ENSDARG00000007217	wdr55	-0.357171	0.761137	0.034958	0.999799
ENSDARG00000007219	actn1	1.50126	0.000110099	0.159357	0.999799
ENSDARG00000007220	ncam1b	0.139455	0.940555	0.338143	0.999799
ENSDARG00000007221	pbk	-0.47604	0.748184	0.18752	0.999799
ENSDARG00000007231	ryk	0.266069	0.724987	-0.194557	0.999799
ENSDARG00000007241	mycb	-0.480732	0.262733	0.426274	0.999799
ENSDARG00000007244	acp2	-0.339761	0.65145	0.499141	0.999799
ENSDARG00000007245	rundc3aa	0.274236	0.921418	-0.0721794	0.999799
ENSDARG00000007247	ric8a	0.149078	0.830684	-0.0195325	0.999799
ENSDARG00000007250	use1	-0.0691231	0.97108	0.0897671	0.999799
ENSDARG00000007257	rab5ab	-0.209287	0.786377	-0.150352	0.999799
ENSDARG00000007264		1.25835	0.418468	-0.0862984	0.999799
ENSDARG00000007271	mynn	0.939787	0.473362	-0.12989	0.999799
ENSDARG00000007275	si:ch211-251b21.1	2.63244	8.85628e-10	0.0348008	0.999799
ENSDARG00000007277	myf5	-0.384308	#N/A	0.183317	0.999799
ENSDARG00000007278	ect2	-0.221183	0.697123	-0.204165	0.999799
ENSDARG00000007285	mrpl57	-0.628337	0.359185	0.341418	0.999799
ENSDARG00000007289	metrnlb	0.727621	0.578174	-0.849789	0.999799
ENSDARG00000007294	aco2	0.136058	0.946965	0.505429	0.999799
ENSDARG00000007302	sh3gl3b	0.683972	0.363014	-0.229268	0.999799
ENSDARG00000007315	tmpoa	0.0438372	0.972032	0.294145	0.999799
ENSDARG00000007320	rpl7	-0.147039	0.898241	0.270903	0.999799
ENSDARG00000007323	chmp4bb	0.651436	#N/A	-0.8327	0.999799
ENSDARG00000007329	tbx16	-0.230279	#N/A	-1.4333	0.999799
ENSDARG00000007344	tcap	-1.09779	0.026134	0.0304796	0.999799
ENSDARG00000007347	degs1	-0.136029	0.859782	-0.0732822	0.999799
ENSDARG00000007349	dmrt1	0.798082	#N/A	-0.859889	0.999799
ENSDARG00000007356	fgf20a	-2.00622	#N/A	2.77704	0.999799
ENSDARG00000007358	cxcr3.1	0.554644	#N/A	-1.26825	0.999799
ENSDARG00000007359	zgc:56596	-0.0719412	#N/A	-0.169579	0.999799
ENSDARG00000007362	sft2d1	0.255694	#N/A	-0.541307	0.999799
ENSDARG00000007366	si:ch73-71d17.1	0.558435	0.68642	-0.108342	0.999799
ENSDARG00000007369	tcf7l1b	-0.12951	#N/A	-0.268319	0.999799
ENSDARG00000007370	dysf	0.206197	0.907793	-0.25517	0.999799
ENSDARG00000007371	slc26a3.1	0.384815	#N/A	-0.493374	0.999799
ENSDARG00000007377	odc1	-0.847653	0.000291462	0.125238	0.999799
ENSDARG00000007382	ubtd1a	1.56503	0.0264876	0.630191	0.999799
ENSDARG00000007383	kcnk6	0.0378888	0.98245	-0.513437	0.999799
ENSDARG00000007387	irf2a	0.0648353	0.947358	0.0357549	0.999799
ENSDARG00000007396	rnd3b	0.380775	0.732497	-0.200176	0.999799
ENSDARG00000007398	lrrk1	0.307499	0.829549	-0.138277	0.999799
ENSDARG00000007405	strap	0.180009	#N/A	-0.16728	0.999799
ENSDARG00000007406	phox2a	-0.268928	0.8369	-0.053615	0.999799
ENSDARG00000007407	barx1	-0.0319275	0.982164	-0.118416	0.999799
ENSDARG00000007409	ppifa	0.190786	0.859343	-0.289054	0.999799
ENSDARG00000007412	slc2a1b	-0.181149	0.724325	-0.131989	0.999799
ENSDARG00000007413	arid2	-0.741449	0.0680451	0.497757	0.999799
ENSDARG00000007418	chmp4c	0.189856	#N/A	0.0548232	0.999799
ENSDARG00000007421	ftcd	2.04735	#N/A	-0.732692	0.999799
ENSDARG00000007425	apol1	0.688197	0.173197	-0.120309	0.999799
ENSDARG00000007429	ndor1	0.546344	0.640329	0.0836368	0.999799
ENSDARG00000007430	prdm12b	0.298568	#N/A	0.269996	0.999799
ENSDARG00000007436	avpr2aa	-0.244405	0.858452	-0.060835	0.999799
ENSDARG00000007438	ube2ib	8.45993e-05	0.999916	0.283195	0.999799
ENSDARG00000007443	fbxl18	-0.266651	0.858452	0.0322436	0.999799
ENSDARG00000007444	ift81	-0.0198104	0.987376	-0.0401149	0.999799
ENSDARG00000007449	slc25a39	-1.14361	0.0455968	0.0846879	0.999799
ENSDARG00000007461	srgap1a	0.47582	0.661592	-0.270727	0.999799
ENSDARG00000007465	tdrd1	-0.0827363	#N/A	1.78189	0.999799
ENSDARG00000007467	ifit10	0.00311903	#N/A	0.968805	0.999799
ENSDARG00000007480	rpe65a	2.23618	0.00806755	-0.233889	0.999799
ENSDARG00000007485	epc2	-0.0281073	0.97614	0.157801	0.999799
ENSDARG00000007490	adrb1	0.120543	0.927711	-0.335314	0.999799
ENSDARG00000007494	st3gal8	0.013252	0.99035	-0.0641509	0.999799
ENSDARG00000007496	ufl1	1.33256	0.288259	-0.0893803	0.999799
ENSDARG00000007523	kmt2e	-0.418803	0.589441	0.244232	0.999799
ENSDARG00000007526	ndufs2	-0.779078	0.0358608	0.563121	0.999799
ENSDARG00000007531	zcchc9	-0.0757794	0.965924	-0.0480891	0.999799
ENSDARG00000007534	itln1	-0.253108	0.877203	-0.182087	0.999799
ENSDARG00000007553	opn4.1	0.872976	0.603911	-0.161141	0.999799
ENSDARG00000007560	sema3bl	-0.0064422	0.996507	0.30052	0.999799
ENSDARG00000007566	appbp2	-0.753171	0.104304	0.349075	0.999799
ENSDARG00000007576	crybb1l1	3.16476	#N/A	-0.373821	0.999799
ENSDARG00000007582	si:ch1073-155h21.1	-0.030482	0.986416	-0.046802	0.999799
ENSDARG00000007597	bloc1s4	0.083232	0.924697	0.0867782	0.999799
ENSDARG00000007601	zmynd8	1.43201	0.00350379	0.459787	0.999799
ENSDARG00000007603	stxbp2	-0.266573	0.758307	0.303789	0.999799
ENSDARG00000007614	wwox	0.0410433	0.985333	0.236879	0.999799
ENSDARG00000007624	gins1	0.317303	0.773481	-0.0490877	0.999799
ENSDARG00000007630	mkrn2	-0.109454	0.963248	0.268045	0.999799
ENSDARG00000007639	cnot4b	-0.409073	0.634894	-0.188411	0.999799
ENSDARG00000007654	nsfa	0.50028	0.602296	-0.464737	0.999799
ENSDARG00000007655	crybb1l3	-1.00991	0.589987	0.399114	0.999799
ENSDARG00000007657	ccnh	-0.24944	0.862641	0.178777	0.999799
ENSDARG00000007663	amph	1.00619	0.242188	-0.286873	0.999799
ENSDARG00000007671	ghrb	0.185732	0.905201	0.118349	0.999799
ENSDARG00000007678	ttyh3b	0.69073	0.201864	-0.65214	0.999799
ENSDARG00000007682	ppdpfa	-1.00536	0.0055145	0.288403	0.999799
ENSDARG00000007691	cul1b	-0.478523	0.377191	0.402976	0.999799
ENSDARG00000007693	nfkbiab	-0.451117	0.240709	0.128904	0.999799
ENSDARG00000007697	fabp7a	0.851954	0.391318	-0.622466	0.999799
ENSDARG00000007708	nsa2	-1.40184	#N/A	0.726332	0.999799
ENSDARG00000007709	adamts8a	0.146069	0.917671	0.512719	0.999799
ENSDARG00000007711	rab3il1	0.4349	0.83798	0.0692605	0.999799
ENSDARG00000007720	sub1b	0.291054	0.783332	-0.534552	0.999799
ENSDARG00000007722	nudt8	1.03086	#N/A	0.826444	0.999799
ENSDARG00000007723	efnb1	-0.362589	0.575717	0.276059	0.999799
ENSDARG00000007727	rgl2	-1.7001	1.03009e-11	-0.10649	0.999799
ENSDARG00000007734	stn1	-0.154097	0.909616	0.632274	0.999799
ENSDARG00000007737	zyg11	0.191993	0.829245	-0.165379	0.999799
ENSDARG00000007739	atp1a1a.2	-0.306236	0.415313	0.104203	0.999799
ENSDARG00000007743	il15l	0.403014	0.710766	-0.210527	0.999799
ENSDARG00000007744	tsr1	-1.0487	0.0765945	0.903486	0.999799
ENSDARG00000007745	uqcrfs1	0.0777758	0.914378	0.0614716	0.999799
ENSDARG00000007751	lmnl3	-0.737752	0.26476	0.323888	0.999799
ENSDARG00000007753	cpne2	0.973559	0.415313	0.382719	0.999799
ENSDARG00000007760	spg21	0.0885843	0.958035	-0.213706	0.999799
ENSDARG00000007764	klhdc10	1.18412	#N/A	0.281177	0.999799
ENSDARG00000007769	sult5a1	0.285466	#N/A	0.343673	0.999799
ENSDARG00000007774	vash2	0.00853066	0.987407	0.239965	0.999799
ENSDARG00000007783	blk	0.278864	0.894861	-0.0467888	0.999799
ENSDARG00000007786	tmx2b	-0.174098	0.77266	0.420343	0.999799
ENSDARG00000007787	zgc:112965	-0.148653	#N/A	-0.37221	0.999799
ENSDARG00000007788	atp2b1b	0.208234	0.794136	-0.311127	0.999799
ENSDARG00000007791	ppp2r1ba	-0.350626	0.697971	0.311429	0.999799
ENSDARG00000007795	cst3	-0.0862717	0.942138	0.664449	0.999799
ENSDARG00000007804	gas6	0.439912	0.793802	-0.456556	0.999799
ENSDARG00000007807	cyth3a	-0.655691	0.612413	0.99452	0.999799
ENSDARG00000007808	zdhhc16a	-1.07055	#N/A	0.830707	0.999799
ENSDARG00000007812	sp3b	-0.430996	0.67376	-0.0037049	0.999799
ENSDARG00000007813	rnpepl1	-1.07101	0.0140483	-0.31125	0.999799
ENSDARG00000007818	palm1b	-0.184473	0.83292	-0.132958	0.999799
ENSDARG00000007823	atf3	-0.542012	0.124879	-0.299218	0.999799
ENSDARG00000007824	camta1b	0.783604	0.186131	-0.242059	0.999799
ENSDARG00000007825	map2k1	0.195173	#N/A	-0.778986	0.999799
ENSDARG00000007836	ctsla	0.0940764	0.915118	0.19332	0.999799
ENSDARG00000007856	rtn4rl1a	0.915643	0.647511	-0.635121	0.999799
ENSDARG00000007863	tra2a	-0.116939	#N/A	-0.242668	0.999799
ENSDARG00000007867	dazap2	-0.721181	0.242289	0.364958	0.999799
ENSDARG00000007869	ehd3	-0.395016	0.493298	0.30942	0.999799
ENSDARG00000007886	slc35b2	-0.464762	0.603911	-0.07502	0.999799
ENSDARG00000007891	meox1	-0.0580661	0.976835	0.245828	0.999799
ENSDARG00000007892	pdcd2	-0.676554	#N/A	-0.688534	0.999799
ENSDARG00000007901	crnkl1	-0.661906	0.26845	-0.104701	0.999799
ENSDARG00000007906	lrp2b	2.64279	#N/A	1.00533	0.999799
ENSDARG00000007912	si:ch211-196i2.1	2.69643	0.00095324	-0.785347	0.999799
ENSDARG00000007916	xpnpep3	-0.545935	0.272327	0.433845	0.999799
ENSDARG00000007918	ttc27	-0.283651	0.709476	0.206554	0.999799
ENSDARG00000007923	ptpn1	-0.56302	0.0139064	0.237409	0.999799
ENSDARG00000007941	hmx4	0.438997	0.734028	-0.436084	0.999799
ENSDARG00000007943	gabpb2a	-0.400042	0.773698	0.157798	0.999799
ENSDARG00000007944	lhx1b	-1.3376	0.129012	0.418759	0.999799
ENSDARG00000007950	itga11b	0.214387	0.883931	-0.262757	0.999799
ENSDARG00000007959	hibadhb	-0.220606	0.724745	0.186631	0.999799
ENSDARG00000007960	hnrnpaba	0.268724	0.624684	0.0551584	0.999799
ENSDARG00000007976	si:ch211-220f16.2	1.08138	#N/A	-0.18419	0.999799
ENSDARG00000007982	onecut1	-0.103378	0.936225	-0.109196	0.999799
ENSDARG00000007988	masp2	-1.47535	#N/A	-0.617557	0.999799
ENSDARG00000007989	nedd8	-0.132361	#N/A	0.329402	0.999799
ENSDARG00000007990	wt1b	-0.164447	0.932643	0.655254	0.999799
ENSDARG00000007996	pou2f1b	0.0352475	0.971282	0.181508	0.999799
ENSDARG00000008010	zgc:194189	0.628535	0.684505	0.405438	0.999799
ENSDARG00000008014	nudt17	-0.238769	0.866874	0.115416	0.999799
ENSDARG00000008020	med31	2.81842	#N/A	-0.879997	0.999799
ENSDARG00000008022	kif18a	-0.33973	0.671975	-0.361483	0.999799
ENSDARG00000008026	fam129bb	-0.367027	0.612413	-0.430529	0.999799
ENSDARG00000008029	mep1a.2	1.75229	#N/A	1.13315	0.999799
ENSDARG00000008032	sart3	0.0814972	#N/A	0.309133	0.999799
ENSDARG00000008034	skib	0.0646745	0.963248	0.0686447	0.999799
ENSDARG00000008049	si:dkey-42i9.4	-0.736841	0.809496	0.114727	0.999799
ENSDARG00000008060	scara3	0.907398	0.399189	0.235109	0.999799
ENSDARG00000008068	tma16	0.393672	#N/A	-0.512453	0.999799
ENSDARG00000008095	olfcd1	1.53092	#N/A	-0.257885	0.999799
ENSDARG00000008097	srsf9	0.365865	0.717455	-0.127636	0.999799
ENSDARG00000008098	ifit9	0.493159	0.783655	0.359199	0.999799
ENSDARG00000008100	slc7a10a	-0.111097	0.948587	0.455692	0.999799
ENSDARG00000008107	src	0.231196	0.864382	-0.156895	0.999799
ENSDARG00000008119	si:ch211-195d17.2	-0.307957	0.724987	0.16853	0.999799
ENSDARG00000008127	pcdh15b	0.915959	0.317213	-0.71128	0.999799
ENSDARG00000008131	sox1b	0.692016	0.569161	-0.777724	0.999799
ENSDARG00000008133	foxl1	0.257101	0.886168	-0.437852	0.999799
ENSDARG00000008140	kcnab1a	-0.48661	#N/A	0.704394	0.999799
ENSDARG00000008141	rbl1	-0.687243	0.0828547	0.0194197	0.999799
ENSDARG00000008142	stxbp3	0.613825	0.436561	-0.5753	0.999799
ENSDARG00000008153	serinc5	-0.686718	0.350635	-0.343367	0.999799
ENSDARG00000008155	sms	1.54391	#N/A	-1.1769	0.999799
ENSDARG00000008164	btr33	5.20102	#N/A	-2.36566	0.999799
ENSDARG00000008165	caspa	0.232859	0.914863	0.493655	0.999799
ENSDARG00000008170	dbnla	-0.421594	#N/A	0.226179	0.999799
ENSDARG00000008174	hoxb1a	-0.548333	0.545114	-0.161939	0.999799
ENSDARG00000008184	mia3	-1.01578	5.60495e-06	0.016308	0.999799
ENSDARG00000008186	syk	0.259032	0.881901	0.527294	0.999799
ENSDARG00000008188	sf1	-0.504327	0.7093	0.374427	0.999799
ENSDARG00000008191	tmeff1a	-0.436756	0.737879	0.235631	0.999799
ENSDARG00000008192	pank1a	-0.327192	0.570163	-0.0651118	0.999799
ENSDARG00000008200	ugp2b	-0.186668	0.902529	0.539828	0.999799
ENSDARG00000008203	pax1a	0.351339	0.828968	-0.479944	0.999799
ENSDARG00000008209	myt1la	1.75362	#N/A	1.42935	0.999799
ENSDARG00000008212	kcnk13a	-1.59268	#N/A	0.942373	0.999799
ENSDARG00000008218	znf410	-1.08748	0.0639742	0.171932	0.999799
ENSDARG00000008219	crygm4	0.88675	#N/A	0.331559	0.999799
ENSDARG00000008224	vps35	-0.192703	0.888419	0.288442	0.999799
ENSDARG00000008235	cog5	-0.219235	0.903445	0.422789	0.999799
ENSDARG00000008237	sars	-0.300019	0.794136	-0.212865	0.999799
ENSDARG00000008238	manba	0.310742	0.871046	0.730074	0.999799
ENSDARG00000008239	mocs3	0.422261	0.608219	-0.730394	0.999799
ENSDARG00000008243	cct8	-0.717166	0.225423	0.45085	0.999799
ENSDARG00000008247	vezf1a	-0.475286	0.657474	0.105643	0.999799
ENSDARG00000008249	ptchd4	0.0998631	0.949367	0.142007	0.999799
ENSDARG00000008255	cnot6a	-0.239436	0.614437	0.297695	0.999799
ENSDARG00000008275	klhl24b	-0.347987	0.556031	0.110689	0.999799
ENSDARG00000008278	rcor2	-0.643613	0.192831	-0.0328457	0.999799
ENSDARG00000008279	map2k7	-0.359106	0.672269	0.198808	0.999799
ENSDARG00000008287	fam114a1	-0.528554	0.222234	-0.0401241	0.999799
ENSDARG00000008292	eif2s3	-0.440066	0.824543	0.20602	0.999799
ENSDARG00000008305	hand2	0.441031	0.699214	-0.122328	0.999799
ENSDARG00000008306	rdh5	1.52636	#N/A	0.752697	0.999799
ENSDARG00000008310	ip6k2a	-0.400482	0.236134	0.0546675	0.999799
ENSDARG00000008322	ambra1a	0.422725	0.793802	0.0205362	0.999799
ENSDARG00000008329	asic1a	1.49476	#N/A	-1.13653	0.999799
ENSDARG00000008333	znfl2a	-2.07652	7.28712e-07	-0.0113876	0.999799
ENSDARG00000008363	mcl1b	0.123065	0.857498	0.0201579	0.999799
ENSDARG00000008370	csnk1da	-0.578643	0.304988	0.0790458	0.999799
ENSDARG00000008372	spred2b	-0.979147	0.414017	0.476327	0.999799
ENSDARG00000008377	epn2	-1.10699	0.00134027	-0.202843	0.999799
ENSDARG00000008380	brd7	-0.875459	0.225926	0.555388	0.999799
ENSDARG00000008383	arpc1a	-0.279935	0.772548	0.210878	0.999799
ENSDARG00000008384	hdac6	-0.159901	0.839601	-0.128829	0.999799
ENSDARG00000008388	mmp14b	-0.178735	0.880996	-0.178449	0.999799
ENSDARG00000008395	snupn	-0.980224	0.0438812	-0.0280013	0.999799
ENSDARG00000008398	cacna1c	0.231643	0.859343	0.130369	0.999799
ENSDARG00000008403	phospho1	0.0168325	#N/A	2.51178	0.999799
ENSDARG00000008407	tspan7b	-0.360112	0.271765	0.531362	0.999799
ENSDARG00000008413	atp11a	0.788597	0.0403606	-0.132929	0.999799
ENSDARG00000008433	unc45b	-0.506988	0.63093	-0.333949	0.999799
ENSDARG00000008434	bcl2l1	-0.0503307	0.949939	0.18354	0.999799
ENSDARG00000008439	atxn10	-0.410335	#N/A	-0.292895	0.999799
ENSDARG00000008447	fkbp4	0.198492	0.805204	0.284897	0.999799
ENSDARG00000008450	pcolce2a	1.31746	0.00556453	-0.566205	0.999799
ENSDARG00000008454	cpeb1b	0.148404	0.94352	0.0749553	0.999799
ENSDARG00000008457	faah2a	0.305508	0.766416	-0.579051	0.999799
ENSDARG00000008461	anapc5	0.310431	0.724325	-0.217646	0.999799
ENSDARG00000008472	apex2	0.0992071	0.944897	-0.0167743	0.999799
ENSDARG00000008480	trmt61a	0.491763	0.350541	0.127978	0.999799
ENSDARG00000008485	lrp3	-1.75709	2.87311e-06	0.0854486	0.999799
ENSDARG00000008487	dmd	0.47548	0.190345	-0.312342	0.999799
ENSDARG00000008490	ltv1	0.660289	0.485959	-0.636193	0.999799
ENSDARG00000008491	si:ch211-107o10.3	0.490042	0.585831	-0.205999	0.999799
ENSDARG00000008502	pno1	-0.413258	0.692912	0.0506041	0.999799
ENSDARG00000008503	glcci1a	-0.561899	0.0854006	0.202912	0.999799
ENSDARG00000008540	sox21b	0.389406	0.766826	-0.723622	0.999799
ENSDARG00000008542	yod1	-0.564899	0.488016	-0.121873	0.999799
ENSDARG00000008548	arhgap12a	0.0462988	0.980521	0.345264	0.999799
ENSDARG00000008551	pole3	-0.350649	0.768619	0.614773	0.999799
ENSDARG00000008553	zgc:136872	-0.0480473	#N/A	0.708034	0.999799
ENSDARG00000008568	slc25a24	1.07247	#N/A	-0.031634	0.999799
ENSDARG00000008573	fam20b	1.20611	0.0737775	0.405733	0.999799
ENSDARG00000008575	lyst	-0.800882	5.05855e-05	0.127286	0.999799
ENSDARG00000008592	mtmr8	-0.431838	0.698391	-0.468023	0.999799
ENSDARG00000008593	nbas	0.181256	0.862874	0.324532	0.999799
ENSDARG00000008623	cops3	-0.265371	0.776784	0.146521	0.999799
ENSDARG00000008637	mttp	0.718184	0.511256	-0.128225	0.999799
ENSDARG00000008660	coro1b	-0.186869	0.875651	-0.0453538	0.999799
ENSDARG00000008662	fign	-0.834294	0.48001	0.19662	0.999799
ENSDARG00000008678	snx3	-1.04215	0.409037	0.267137	0.999799
ENSDARG00000008697	epas1a	0.140612	0.893818	-0.00512905	0.999799
ENSDARG00000008706	paip2b	0.369393	0.762291	0.109011	0.999799
ENSDARG00000008720	lmo3	1.12847	#N/A	-0.697927	0.999799
ENSDARG00000008723	prkcba	-0.200204	0.850737	-0.0135503	0.999799
ENSDARG00000008727	ranbp3a	0.0351599	0.979046	-0.0316767	0.999799
ENSDARG00000008732	zgc:66479	0.323299	0.844399	-0.0676907	0.999799
ENSDARG00000008735	atp6ap2	-0.236151	0.804539	0.187551	0.999799
ENSDARG00000008748	ube2na	-0.673828	0.490689	0.11966	0.999799
ENSDARG00000008757	entpd6	-0.472402	0.538955	-0.369386	0.999799
ENSDARG00000008765	tmed5	-0.000625506	0.999601	-0.182846	0.999799
ENSDARG00000008767	tle2b	0.159636	0.909392	-0.208138	0.999799
ENSDARG00000008772	cacng1a	0.984265	#N/A	-0.653707	0.999799
ENSDARG00000008784	prpf4ba	0.189629	#N/A	0.05896	0.999799
ENSDARG00000008785	dldh	0.107849	0.949939	0.575055	0.999799
ENSDARG00000008788	camk1gb	0.281317	0.876117	-0.312054	0.999799
ENSDARG00000008790	actr3b	1.16407	0.0127755	0.485726	0.999799
ENSDARG00000008796	her5	-0.122779	#N/A	-0.0606898	0.999799
ENSDARG00000008803	marcksb	-0.123248	0.871873	0.00416235	0.999799
ENSDARG00000008805	orc3	0.902825	#N/A	-1.3305	0.999799
ENSDARG00000008807	bokb	0.124746	#N/A	-0.52988	0.999799
ENSDARG00000008808	eml2	0.588037	0.105497	0.122527	0.999799
ENSDARG00000008811	cmtm3	-0.185423	0.854517	-0.169704	0.999799
ENSDARG00000008816	glud1a	0.439736	0.785685	-0.40515	0.999799
ENSDARG00000008818	hsf1	0.350388	0.814711	0.430366	0.999799
ENSDARG00000008832	neu1	-0.283129	0.784317	-0.0666821	0.999799
ENSDARG00000008835	si:dkey-46g23.5	1.20928	#N/A	-0.960854	0.999799
ENSDARG00000008840	hmbsa	-1.06939	0.000110099	0.0590499	0.999799
ENSDARG00000008849	ptprq	0.662935	#N/A	0.843797	0.999799
ENSDARG00000008852	elp4	-0.0842681	0.884638	0.00921388	0.999799
ENSDARG00000008858	cyp7b1	-1.00471	0.5022	0.292934	0.999799
ENSDARG00000008859	mylipa	-0.0646915	0.944776	-0.232571	0.999799
ENSDARG00000008861	tfap2e	1.83841	1.06841e-07	0.270679	0.999799
ENSDARG00000008866	cabp4	-1.05179	#N/A	0.832222	0.999799
ENSDARG00000008867	rap1b	-0.341223	0.480961	0.338512	0.999799
ENSDARG00000008880	usp28	0.946834	#N/A	-1.5627	0.999799
ENSDARG00000008884	hprt1	-0.433816	0.588133	0.0860676	0.999799
ENSDARG00000008886	msx1b	-0.168357	0.756193	-0.33126	0.999799
ENSDARG00000008890	ctns	0.83695	0.416534	-0.391212	0.999799
ENSDARG00000008904	smarca2	-0.288589	0.455537	0.0879218	0.999799
ENSDARG00000008906	si:ch211-241e1.5	0.522537	0.807356	-0.620683	0.999799
ENSDARG00000008912	slc8a2a	1.31709	#N/A	-0.761257	0.999799
ENSDARG00000008920	mrpl53	-1.26646	0.319912	0.247744	0.999799
ENSDARG00000008931	renbp	1.37989	0.000100425	0.00824884	0.999799
ENSDARG00000008936	sec11a	1.11905	#N/A	-0.483899	0.999799
ENSDARG00000008946	ccdc127b	-1.4266	#N/A	0.871877	0.999799
ENSDARG00000008947	rtf1	-0.615988	0.397898	0.37806	0.999799
ENSDARG00000008948	pla2g3	1.11326	#N/A	-0.170668	0.999799
ENSDARG00000008953	pofut1	-0.762528	0.341728	0.699353	0.999799
ENSDARG00000008966	tbl1xr1b	-0.293178	0.467009	-0.202961	0.999799
ENSDARG00000008969	fgb	0.194908	#N/A	0.0692446	0.999799
ENSDARG00000008976	mdn1	1.60173	0.104587	0.417815	0.999799
ENSDARG00000008979	golga1	0.167453	0.783532	0.0289994	0.999799
ENSDARG00000008982	casq2	-0.305436	#N/A	0.328597	0.999799
ENSDARG00000008983	sh3glb2a	1.07508	#N/A	-0.395835	0.999799
ENSDARG00000008986	e2f7	-1.21214	2.59795e-05	0.198528	0.999799
ENSDARG00000009001	pdia6	-0.633936	0.0990597	0.463006	0.999799
ENSDARG00000009014	col11a1b	0.142405	#N/A	0.232829	0.999799
ENSDARG00000009018	rhbg	0.523156	#N/A	0.0469774	0.999799
ENSDARG00000009020	cnr1	0.303226	#N/A	-0.0199809	0.999799
ENSDARG00000009021	chrna1	0.536725	0.670395	-0.0701139	0.999799
ENSDARG00000009023	ankrd28b	0.426247	#N/A	-0.0524632	0.999799
ENSDARG00000009026	ank2a	1.23387	#N/A	0.0654535	0.999799
ENSDARG00000009031	tnikb	-0.268155	0.766846	-0.0168929	0.999799
ENSDARG00000009040	si:ch73-141c7.1	-0.0878972	0.94352	0.0209984	0.999799
ENSDARG00000009074	cbr4	-0.0647949	0.972032	0.7066	0.999799
ENSDARG00000009079		0.0630554	#N/A	0.0570258	0.999799
ENSDARG00000009087	cd74a	-0.382493	0.802829	0.0769376	0.999799
ENSDARG00000009094	gata2b	-0.344667	0.85416	-0.369277	0.999799
ENSDARG00000009106	serinc1	-0.197599	0.836312	0.217556	0.999799
ENSDARG00000009123	sele	-0.973064	#N/A	-0.000418824	0.999799
ENSDARG00000009131	slc10a4	-1.05302	0.416534	-0.25123	0.999799
ENSDARG00000009133	myo1eb	1.18219	#N/A	-0.00939687	0.999799
ENSDARG00000009134	hlx1	0.00500201	0.996673	0.0479437	0.999799
ENSDARG00000009136	tp53bp2a	0.935954	#N/A	-0.533582	0.999799
ENSDARG00000009142	ppp1r13bb	0.125424	0.925209	0.293232	0.999799
ENSDARG00000009160	kmo	0.699248	0.652616	0.763844	0.999799
ENSDARG00000009161	ftr55	0.751776	#N/A	-0.285674	0.999799
ENSDARG00000009169	mob1ba	0.577835	0.297831	-0.315058	0.999799
ENSDARG00000009170	ctr9	-0.235594	0.780391	-0.098596	0.999799
ENSDARG00000009178	zfand1	0.852997	#N/A	1.65377	0.999799
ENSDARG00000009194	col16a1	1.25068	3.07398e-05	-0.177187	0.999799
ENSDARG00000009208	prkcda	-0.317072	0.886747	-0.226852	0.999799
ENSDARG00000009209	slc9a6a	-1.00912	0.0888742	0.465642	0.999799
ENSDARG00000009212	ppiaa	0.846441	0.000871976	-0.0414687	0.999799
ENSDARG00000009214	mfsd13a	-0.521422	0.436561	0.410582	0.999799
ENSDARG00000009215	zgc:112437	-0.0167194	0.991878	-0.847374	0.999799
ENSDARG00000009217	tom1l2	-0.150921	0.829755	0.00184472	0.999799
ENSDARG00000009218	mars2	0.249899	0.846644	0.226734	0.999799
ENSDARG00000009242	fev	-0.521447	0.739899	-0.193694	0.999799
ENSDARG00000009250	etfb	0.0285401	0.960765	0.119935	0.999799
ENSDARG00000009252	napepld	-0.435883	0.618828	0.308854	0.999799
ENSDARG00000009253	rtraf	1.19354	0.391866	0.249988	0.999799
ENSDARG00000009262	si:dkey-97m3.1	0.0463115	0.97739	-0.665969	0.999799
ENSDARG00000009266	uevld	1.7297	#N/A	0.356965	0.999799
ENSDARG00000009267	zgc:136439	-0.635484	0.213598	0.305832	0.999799
ENSDARG00000009273	ppm1da	0.257798	0.859134	-0.145738	0.999799
ENSDARG00000009280	smyd1a	0.620715	#N/A	-0.714704	0.999799
ENSDARG00000009281	dnm1b	0.941846	#N/A	0.458816	0.999799
ENSDARG00000009285	rpl15	-0.000746482	0.999601	0.240321	0.999799
ENSDARG00000009311	pvalb6	1.30381	#N/A	-0.882024	0.999799
ENSDARG00000009313	zgc:63831	-0.583581	0.653695	0.306437	0.999799
ENSDARG00000009336	aif1l	-0.273694	0.773698	-0.289941	0.999799
ENSDARG00000009341	nrap	1.45154	#N/A	-0.187348	0.999799
ENSDARG00000009342	txndc5	-0.0129554	0.988437	0.285915	0.999799
ENSDARG00000009346	caprin1a	-1.33436	0.16258	1.10514	0.999799
ENSDARG00000009350	atg3	0.229897	0.816194	0.0131963	0.999799
ENSDARG00000009351	fgf6a	0.419999	0.65101	-0.116022	0.999799
ENSDARG00000009372	diras1b	0.0321639	#N/A	1.362	0.999799
ENSDARG00000009387	robo4	0.886078	#N/A	-0.666308	0.999799
ENSDARG00000009390	npl	-0.958504	0.00260783	0.555885	0.999799
ENSDARG00000009401	vcanb	0.278206	0.810746	-0.464775	0.999799
ENSDARG00000009418	mef2cb	0.30939	0.741512	0.510638	0.999799
ENSDARG00000009430	tmem30c	0.0303689	0.989962	0.0821841	0.999799
ENSDARG00000009436	ubxn7	-0.204729	0.89342	0.668995	0.999799
ENSDARG00000009443	zgc:92137	-0.0848285	#N/A	-0.413522	0.999799
ENSDARG00000009447	atp5mc3b	-0.119815	0.894156	-0.292178	0.999799
ENSDARG00000009459	slc35e4	0.0995582	0.895744	0.275221	0.999799
ENSDARG00000009466	rgs9bp	0.30989	#N/A	-0.447763	0.999799
ENSDARG00000009470	hnf1a	0.252104	#N/A	-0.367368	0.999799
ENSDARG00000009471	nid2b	0.282584	0.817379	0.0917121	0.999799
ENSDARG00000009472	med19b	-0.302657	0.828427	0.718261	0.999799
ENSDARG00000009473	ppardb	-0.221356	0.857848	-0.160394	0.999799
ENSDARG00000009477	prkar2ab	-0.161475	#N/A	1.25654	0.999799
ENSDARG00000009482	slc38a8a	0.697421	0.699296	-0.262293	0.999799
ENSDARG00000009488	gipc2	0.496089	0.613909	-0.0153144	0.999799
ENSDARG00000009493	si:ch211-45c16.2	0.0985293	0.946425	0.163878	0.999799
ENSDARG00000009494	xrcc1	-0.809997	0.205181	-0.0759212	0.999799
ENSDARG00000009499	syne1a	-0.726861	0.209409	-0.272184	0.999799
ENSDARG00000009505	prelid3b	0.502355	0.139304	0.197632	0.999799
ENSDARG00000009511	tnfa	2.04142	#N/A	-0.767573	0.999799
ENSDARG00000009524	rnf150b	-0.331223	0.660211	0.109825	0.999799
ENSDARG00000009525	tial1	-0.157305	0.887521	0.0523977	0.999799
ENSDARG00000009534	wls	-0.0320309	0.974889	-0.188405	0.999799
ENSDARG00000009544	cldnb	0.400375	0.777887	0.645131	0.999799
ENSDARG00000009549	ubr4	-0.456676	0.419358	0.229186	0.999799
ENSDARG00000009550	foxi3b	0.134679	0.935176	-0.36563	0.999799
ENSDARG00000009553	gng3	-0.471931	#N/A	1.83707	0.999799
ENSDARG00000009557	wrap73	0.263196	0.754741	-0.207036	0.999799
ENSDARG00000009567	spegb	-0.242429	#N/A	0.105148	0.999799
ENSDARG00000009568	ca10b	-0.945127	#N/A	0.42239	0.999799
ENSDARG00000009585	papola	1.26222	0.216599	-0.178081	0.999799
ENSDARG00000009594	nr1d2b	-0.381061	0.256512	-0.24097	0.999799
ENSDARG00000009607	ccnc	-0.0574044	0.979046	-0.330991	0.999799
ENSDARG00000009610	rgs12a	-0.985239	0.00354287	-0.00188664	0.999799
ENSDARG00000009612	chia.3	1.40582	#N/A	-0.135761	0.999799
ENSDARG00000009624		0.474279	#N/A	-0.547402	0.999799
ENSDARG00000009626	nrbp2b	0.614932	#N/A	-0.596812	0.999799
ENSDARG00000009629	unc119.1	0.0845774	0.935176	-0.155563	0.999799
ENSDARG00000009637	rcvrn3	0.428354	#N/A	0.00449062	0.999799
ENSDARG00000009640	psmb1	-0.911803	0.129701	0.346366	0.999799
ENSDARG00000009653	lhfpl2a	-0.891012	0.0128714	-0.221009	0.999799
ENSDARG00000009657	fgfr1op2	-1.27541	0.0178604	0.182758	0.999799
ENSDARG00000009677	dlg1	0.399437	0.658221	-0.126057	0.999799
ENSDARG00000009681	med27	-1.33117	0.341594	0.625996	0.999799
ENSDARG00000009685	ppa2	0.330519	0.783152	0.0783853	0.999799
ENSDARG00000009689	daam1b	-0.0677016	0.958696	0.105242	0.999799
ENSDARG00000009693	llgl1	-0.254062	0.689502	0.0829043	0.999799
ENSDARG00000009702	ascl1b	0.60723	0.614437	0.253343	0.999799
ENSDARG00000009724	rpn2	0.0333404	0.979046	-0.156869	0.999799
ENSDARG00000009733	kif21b	-0.303109	0.586106	0.150144	0.999799
ENSDARG00000009735	gigyf2	-0.316478	0.584049	0.247953	0.999799
ENSDARG00000009738	cacnb4a	-1.15284	0.164383	0.0103721	0.999799
ENSDARG00000009740	ppp1r7	-0.187817	0.920549	0.120876	0.999799
ENSDARG00000009743	efhc1	-0.257206	0.817009	0.27034	0.999799
ENSDARG00000009745	fbxw2	-1.4222	0.00116015	0.0608435	0.999799
ENSDARG00000009748	dffb	-0.717141	0.60233	-0.0835637	0.999799
ENSDARG00000009753	sf3b6	-0.569937	0.488623	0.478992	0.999799
ENSDARG00000009754	zc3h11a	-0.810551	0.0846294	0.698605	0.999799
ENSDARG00000009764	srek1	-0.28035	0.870187	-0.275815	0.999799
ENSDARG00000009771	ppme1	-0.394263	0.296012	0.253129	0.999799
ENSDARG00000009779	mcl1a	-1.1245	0.10403	0.0159823	0.999799
ENSDARG00000009782	myh11a	0.450486	0.809891	-0.143913	0.999799
ENSDARG00000009796	klc1a	0.193693	0.809853	0.28556	0.999799
ENSDARG00000009806	smfn	-0.0657757	0.93898	0.144492	0.999799
ENSDARG00000009822	her4.4	0.749925	0.62051	0.544634	0.999799
ENSDARG00000009823	pou3f1	0.153123	0.879376	-0.00251045	0.999799
ENSDARG00000009825	mmp23bb	-0.656784	0.687956	0.646376	0.999799
ENSDARG00000009830	hdlbpa	0.339461	0.529788	-0.0857646	0.999799
ENSDARG00000009837	agk	0.77863	#N/A	-1.69777	0.999799
ENSDARG00000009839	fam117bb	0.170496	0.796033	0.356075	0.999799
ENSDARG00000009844	dusp23a	0.303143	#N/A	-0.646999	0.999799
ENSDARG00000009851	wdr41	-0.101209	0.948447	0.335347	0.999799
ENSDARG00000009864	ddx55	0.244149	0.883944	-0.298359	0.999799
ENSDARG00000009868	dcaf11	-0.114452	0.938698	0.334222	0.999799
ENSDARG00000009870	mapk8b	-0.573166	0.236365	-0.507474	0.999799
ENSDARG00000009871	snrpc	-0.637849	0.152695	0.200377	0.999799
ENSDARG00000009881	ier5	-0.34668	0.358746	0.224406	0.999799
ENSDARG00000009885	sult3st1	0.557055	0.592646	-0.147287	0.999799
ENSDARG00000009886	rnf114	0.0022974	0.998373	-0.0160057	0.999799
ENSDARG00000009899	znf385a	0.227386	0.829471	0.219442	0.999799
ENSDARG00000009901	slc38a5a	0.283505	0.789739	0.174616	0.999799
ENSDARG00000009922	dmbx1a	-0.46487	0.740568	-0.797078	0.999799
ENSDARG00000009930	cadm2a	0.694213	0.612413	-0.843702	0.999799
ENSDARG00000009939	micu2	-0.813411	0.0943429	-0.070145	0.999799
ENSDARG00000009941	erc1a	0.317315	0.876211	0.567143	0.999799
ENSDARG00000009942	cdc6	-0.182175	0.703443	-0.334385	0.999799
ENSDARG00000009949	fndc4b	0.0292466	0.987686	-0.0206525	0.999799
ENSDARG00000009950	edf1	-0.0900659	0.941906	-0.625902	0.999799
ENSDARG00000009953	med14	0.439293	0.66891	-0.179243	0.999799
ENSDARG00000009958	cbl	-0.233856	0.82809	-0.240575	0.999799
ENSDARG00000009961	rundc3b	-0.158549	#N/A	0.62423	0.999799
ENSDARG00000009978	icn	0.493103	#N/A	-1.35223	0.999799
ENSDARG00000009982	fam199x	0.209639	0.821168	-0.070409	0.999799
ENSDARG00000010002	gna11a	1.60833	0.000664803	-0.297047	0.999799
ENSDARG00000010008	vim	0.480598	0.603911	-0.617409	0.999799
ENSDARG00000010010	trim13	-0.224416	0.796872	0.0195187	0.999799
ENSDARG00000010018	qki2	0.821111	0.0617615	0.0209728	0.999799
ENSDARG00000010021	grpel1	-0.62881	0.0348167	0.416195	0.999799
ENSDARG00000010023		0.161023	0.883143	-0.0171063	0.999799
ENSDARG00000010029	spon1a	0.214856	0.873184	-0.279316	0.999799
ENSDARG00000010031	ssh1b	0.368149	0.493941	-0.162131	0.999799
ENSDARG00000010032	cmtm7	0.600371	0.411127	-0.238886	0.999799
ENSDARG00000010035	engase	-0.146076	0.907808	0.378596	0.999799
ENSDARG00000010042	dnm1a	0.631365	#N/A	-0.278708	0.999799
ENSDARG00000010047	neu3.2	1.4892	0.185728	-0.202223	0.999799
ENSDARG00000010051	ufd1l	-1.04661	0.265459	0.0924196	0.999799
ENSDARG00000010052	ndrg3b	-0.267744	0.739125	-0.0758205	0.999799
ENSDARG00000010059	itpkb	-0.386841	#N/A	-0.37905	0.999799
ENSDARG00000010070	adam9	1.8158	0.0143172	-0.525539	0.999799
ENSDARG00000010075		-0.340361	#N/A	1.03013	0.999799
ENSDARG00000010078	nup133	0.787516	0.337198	0.278847	0.999799
ENSDARG00000010083	rbfox3a	1.67467	0.084131	-1.04613	0.999799
ENSDARG00000010085	p4ha2	0.69294	0.391318	-0.402985	0.999799
ENSDARG00000010096	slc1a6	-1.03816	#N/A	1.7972	0.999799
ENSDARG00000010097	f9a	0.903384	0.518269	0.660667	0.999799
ENSDARG00000010098	pank1b	0.0579688	0.949939	-0.306145	0.999799
ENSDARG00000010108	bri3bp	1.98947	#N/A	-0.346156	0.999799
ENSDARG00000010113	ndufb8	-0.487753	0.367884	0.227176	0.999799
ENSDARG00000010130	smpdl3b	1.50756	#N/A	0.122682	0.999799
ENSDARG00000010132	dacha	-0.134809	0.787774	-0.179064	0.999799
ENSDARG00000010137	ldb1a	0.324151	0.408977	0.174326	0.999799
ENSDARG00000010144	plppr3a	-0.352011	0.593365	-0.304474	0.999799
ENSDARG00000010149	atp5fa1	0.0329625	0.974998	-0.449569	0.999799
ENSDARG00000010154	vstm4a	-0.380849	#N/A	0.320834	0.999799
ENSDARG00000010160	rps15a	-0.185452	0.816259	0.151747	0.999799
ENSDARG00000010169	myd88	1.01466	#N/A	-0.206506	0.999799
ENSDARG00000010181	asap2a	-0.626205	0.297257	0.372838	0.999799
ENSDARG00000010183	si:ch73-265h17.1	0.530255	#N/A	-0.732902	0.999799
ENSDARG00000010186	myo3a	0.947055	#N/A	-2.25295	0.999799
ENSDARG00000010192	pax3a	0.84573	0.114789	-0.772796	0.999799
ENSDARG00000010194	eif4bb	-0.355907	0.50439	0.145375	0.999799
ENSDARG00000010207	smad3b	0.852083	0.258712	-0.085461	0.999799
ENSDARG00000010238	rbm22	-0.48585	0.409656	0.0849634	0.999799
ENSDARG00000010244	rpl22l1	-0.776376	0.0680451	0.387592	0.999799
ENSDARG00000010246	prmt1	-0.255201	0.614437	0.125231	0.999799
ENSDARG00000010248	wdr54	-0.267409	0.771329	0.42423	0.999799
ENSDARG00000010250	nqo1	-0.818566	0.522267	1.10014	0.999799
ENSDARG00000010252	jak3	-0.0428433	0.983191	-0.329275	0.999799
ENSDARG00000010255	bin2b	-0.256688	0.881767	0.0901948	0.999799
ENSDARG00000010266	igf2bp3	-0.178532	0.859343	0.125816	0.999799
ENSDARG00000010267	dpydb	0.229251	0.872144	-0.310757	0.999799
ENSDARG00000010270	fezf1	1.05697	0.272007	-0.231612	0.999799
ENSDARG00000010276	ptgs2b	0.999936	0.22474	0.305312	0.999799
ENSDARG00000010279	scamp2	-0.0925174	0.941869	-0.665141	0.999799
ENSDARG00000010280	clasp1a	-0.14687	0.897344	-0.0207232	0.999799
ENSDARG00000010281	xpo4	-0.52307	0.481854	0.0936625	0.999799
ENSDARG00000010294	fmodb	0.708372	#N/A	1.13141	0.999799
ENSDARG00000010296	kcnh6b	1.01063	#N/A	-0.986912	0.999799
ENSDARG00000010312	cp	0.668311	#N/A	-0.713213	0.999799
ENSDARG00000010316	qars	0.0111927	0.986551	0.0730515	0.999799
ENSDARG00000010317	gpr183a	0.482355	0.639993	0.563388	0.999799
ENSDARG00000010318	srpx	-0.632417	0.726803	0.0758099	0.999799
ENSDARG00000010331	si:ch211-26b3.2	-0.287912	0.718786	-0.27067	0.999799
ENSDARG00000010332	zgc:56231	0.570786	#N/A	-1.2654	0.999799
ENSDARG00000010347	acer1	0.38595	0.827612	-0.631455	0.999799
ENSDARG00000010350	c1ql3a	0.286591	0.854134	-0.0813225	0.999799
ENSDARG00000010376	slc5a3a	0.550997	0.760518	-0.293008	0.999799
ENSDARG00000010381	rnf2	-0.67599	0.663955	1.27377	0.999799
ENSDARG00000010384	lpar5a	0.406274	0.755901	-0.0325012	0.999799
ENSDARG00000010385	sept4a	-0.455435	0.713545	0.684293	0.999799
ENSDARG00000010400	lrrfip2	-0.679208	0.340765	0.0135101	0.999799
ENSDARG00000010407	ppp4r4	0.0294042	0.985628	0.501786	0.999799
ENSDARG00000010408	igsf9b	-0.31297	0.808697	0.329156	0.999799
ENSDARG00000010411	epn1	-0.577875	0.225656	-0.0269376	0.999799
ENSDARG00000010415	sirt4	-0.576667	0.495445	0.196488	0.999799
ENSDARG00000010420	ndrg1b	1.14927	0.247154	-0.175444	0.999799
ENSDARG00000010423	npsn	-1.43422	0.378596	1.0207	0.999799
ENSDARG00000010432	eaf2	-0.527687	0.0672052	0.155203	0.999799
ENSDARG00000010434	clu	0.715016	#N/A	-0.00891143	0.999799
ENSDARG00000010437	tent5c	-1.15116	0.143615	-0.253893	0.999799
ENSDARG00000010442	rnf11a	-0.691988	0.306634	0.283693	0.999799
ENSDARG00000010445	trabd	-0.301624	0.769619	-0.132675	0.999799
ENSDARG00000010454	guca1a	1.09531	#N/A	0.822834	0.999799
ENSDARG00000010472	atp1a2a	1.5489	0.210329	0.257455	0.999799
ENSDARG00000010478	hsp90aa1.1	0.722588	0.436486	-0.439078	0.999799
ENSDARG00000010481	bzw1a	0.258877	0.83877	-0.31531	0.999799
ENSDARG00000010482	prg4a	1.07174	0.204018	-0.10183	0.999799
ENSDARG00000010487	sae1	0.216707	0.925734	-0.347565	0.999799
ENSDARG00000010514	cxcr5	0.751617	#N/A	0.332593	0.999799
ENSDARG00000010515	dvl1a	0.180381	0.841104	0.0998533	0.999799
ENSDARG00000010516	rpl21	-0.004582	0.99661	-0.30475	0.999799
ENSDARG00000010519	per3	-0.694416	0.0078286	-0.110412	0.999799
ENSDARG00000010524	si:ch211-282j22.3	1.06869	#N/A	-0.633087	0.999799
ENSDARG00000010531	scamp4	-0.33515	0.569105	-0.216235	0.999799
ENSDARG00000010553	mmgt1	0.0671361	0.953718	0.0111317	0.999799
ENSDARG00000010555	pdha1b	1.32174	#N/A	0.000845842	0.999799
ENSDARG00000010556	mmp25b	0.668085	#N/A	-0.245455	0.999799
ENSDARG00000010563	spoplb	0.403981	0.546763	0.139828	0.999799
ENSDARG00000010563	spopla	0.403981	0.546763	0.139828	0.999799
ENSDARG00000010571	ezh2	0.199853	0.720484	0.179972	0.999799
ENSDARG00000010572	slc25a25a	-0.429307	0.237755	0.102614	0.999799
ENSDARG00000010583	pard3ab	-0.552917	0.492171	0.196002	0.999799
ENSDARG00000010586	tex9	-0.792475	0.557415	-0.340323	0.999799
ENSDARG00000010591	foxn4	-0.592479	0.363014	-0.227967	0.999799
ENSDARG00000010601	mtmr10	-0.668228	0.474931	0.647075	0.999799
ENSDARG00000010602	zgc:112294	0.548623	#N/A	-0.25649	0.999799
ENSDARG00000010603	kctd9b	0.38946	0.805051	0.0606453	0.999799
ENSDARG00000010610	sarm1	-0.0835412	0.946965	0.0198804	0.999799
ENSDARG00000010625	clic2	-0.790335	0.0348686	0.458762	0.999799
ENSDARG00000010630	hoxb6a	0.361261	0.830954	-0.0449346	0.999799
ENSDARG00000010641	slc20a1b	0.499901	0.501801	0.119169	0.999799
ENSDARG00000010655	ppm1k	0.302767	0.65303	-0.379996	0.999799
ENSDARG00000010658	insig1	-0.314434	0.635166	0.276597	0.999799
ENSDARG00000010662	fbxo36a	1.59858	#N/A	0.686163	0.999799
ENSDARG00000010673	trim16	-0.80885	0.0278881	-0.326164	0.999799
ENSDARG00000010680	gngt2a	1.11161	#N/A	-0.320355	0.999799
ENSDARG00000010681	tjap1	-0.038787	0.976672	-0.106055	0.999799
ENSDARG00000010700	il17d	-0.00796044	0.996868	-0.323949	0.999799
ENSDARG00000010701	crygs4	0.901213	0.465537	-0.371918	0.999799
ENSDARG00000010710	msi1	0.645395	0.244781	-0.491434	0.999799
ENSDARG00000010712	npffr1l3	-0.507487	#N/A	-0.127996	0.999799
ENSDARG00000010717	chchd10	-0.48139	0.658681	-0.283075	0.999799
ENSDARG00000010721	sept6	0.453465	0.300466	-0.0358651	0.999799
ENSDARG00000010727	ttyh2l	0.32199	0.731893	-0.076193	0.999799
ENSDARG00000010738	zgc:101716	-0.883147	0.242289	0.500518	0.999799
ENSDARG00000010745	dnaja2l	-0.674271	0.347598	0.0233159	0.999799
ENSDARG00000010752	acsl4b	-0.109177	0.895744	0.334638	0.999799
ENSDARG00000010756	nod2	-0.566894	0.592259	0.656541	0.999799
ENSDARG00000010758	capn12	0.493721	0.77228	0.205699	0.999799
ENSDARG00000010764	flj13639	-0.388968	0.736124	-0.136363	0.999799
ENSDARG00000010767	epha4l	-0.512019	0.44572	-0.324259	0.999799
ENSDARG00000010770	sox19a	-0.111765	#N/A	-0.147175	0.999799
ENSDARG00000010773	pnpla6	-0.00889844	0.990105	-0.0691108	0.999799
ENSDARG00000010779	tlk2	0.584059	0.400322	-0.134774	0.999799
ENSDARG00000010782	zgc:55621	0.108403	0.969703	1.41748	0.999799
ENSDARG00000010784	ppp1r12a	-0.407259	0.281198	0.151291	0.999799
ENSDARG00000010785	thbs1b	0.382005	0.618968	-0.289152	0.999799
ENSDARG00000010789	homer3b	0.742181	0.601335	-0.626511	0.999799
ENSDARG00000010791	dla	-0.191047	0.91638	-1.00393	0.999799
ENSDARG00000010792	cdc25b	-0.22979	0.501511	0.0874829	0.999799
ENSDARG00000010794	tfeb	0.380519	0.496862	0.536221	0.999799
ENSDARG00000010816	slc7a14a	0.826077	0.339421	0.260139	0.999799
ENSDARG00000010823	memo1	-0.10276	0.859343	0.238649	0.999799
ENSDARG00000010831	churc1	0.166542	0.929472	-0.237744	0.999799
ENSDARG00000010844	kras	-0.0508708	0.934972	-0.0656877	0.999799
ENSDARG00000010862	amt	-0.0717335	0.963358	0.362903	0.999799
ENSDARG00000010873	si:dkey-156n14.5	0.0426855	0.9801	-0.335534	0.999799
ENSDARG00000010878	cdkn1ca	0.00143756	0.998373	-0.450688	0.999799
ENSDARG00000010905	mettl13	0.0479294	0.934441	0.133018	0.999799
ENSDARG00000010918	nprl3	0.153173	0.949939	-0.0381551	0.999799
ENSDARG00000010925		1.35073	#N/A	0.0691225	0.999799
ENSDARG00000010933	cacna1fa	-0.00814586	0.9947	-0.563538	0.999799
ENSDARG00000010934	syt14a	-0.332655	0.709652	0.486295	0.999799
ENSDARG00000010936	abcb4	0.116077	0.956192	-0.537312	0.999799
ENSDARG00000010940		2.60765	#N/A	-1.18687	0.999799
ENSDARG00000010941	pomgnt2	0.084882	0.919551	0.21527	0.999799
ENSDARG00000010945	rapgef6	0.826674	0.579849	0.655246	0.999799
ENSDARG00000010946	cbsb	-0.638561	0.10811	0.310439	0.999799
ENSDARG00000010948	kif11	-0.6997	0.111663	0.245129	0.999799
ENSDARG00000010953	ndel1a	-0.144677	0.903638	0.515013	0.999799
ENSDARG00000010956	sh3glb1b	0.286309	0.731834	0.2497	0.999799
ENSDARG00000010957	mpp2b	1.00577	0.541857	-1.04568	0.999799
ENSDARG00000010958	glmnb	0.66323	#N/A	-0.238423	0.999799
ENSDARG00000010962	fkbp7	0.377777	0.833454	-0.852157	0.999799
ENSDARG00000010965	psma8	0.1331	0.881145	-0.293974	0.999799
ENSDARG00000010977	rab34b	0.431539	0.325094	-0.161976	0.999799
ENSDARG00000010978	trmt1	0.0612151	0.963571	0.256146	0.999799
ENSDARG00000010981	zdhhc3a	-0.538498	0.694282	0.442484	0.999799
ENSDARG00000011000	gtf2a1	0.201886	0.635166	0.0574287	0.999799
ENSDARG00000011020	hnrnpa1a	-0.651432	0.146132	-0.191665	0.999799
ENSDARG00000011023	pdlim3a	0.818096	0.661592	0.157792	0.999799
ENSDARG00000011026	zgc:92907	-0.264488	0.92793	-0.423711	0.999799
ENSDARG00000011027	fgfr1a	0.384358	#N/A	-0.226858	0.999799
ENSDARG00000011042	pgbd5	0.170519	0.907563	0.323839	0.999799
ENSDARG00000011049	slc17a9b	1.26602	0.24556	-0.187963	0.999799
ENSDARG00000011055	fbxo9	-0.27039	0.707951	0.106661	0.999799
ENSDARG00000011065	camk2b1	-0.953536	0.0017592	0.29994	0.999799
ENSDARG00000011066	glra3	0.713545	0.413694	0.249692	0.999799
ENSDARG00000011072	ddx11	0.528336	0.619349	-0.419573	0.999799
ENSDARG00000011076	zgc:91968	0.986711	0.159757	-0.437801	0.999799
ENSDARG00000011079	wdr3	0.902975	0.317463	0.0571842	0.999799
ENSDARG00000011083	si:dkey-42l23.2	1.23007	0.386383	0.766887	0.999799
ENSDARG00000011088	si:ch211-288d18.1	-0.0547177	0.965478	0.0112657	0.999799
ENSDARG00000011091	drd2b	2.43631	4.09135e-11	0.0381856	0.999799
ENSDARG00000011094	ccna2	-1.28518	2.48398e-05	0.0840468	0.999799
ENSDARG00000011113	chrna10a	1.64173	0.0140866	0.452726	0.999799
ENSDARG00000011125	snrpb	0.963763	0.411403	-0.170658	0.999799
ENSDARG00000011141	dpysl5a	0.383491	0.407532	0.410905	0.999799
ENSDARG00000011146	uqcrb	-0.753231	#N/A	2.18153	0.999799
ENSDARG00000011152	rpp14	-0.300748	0.881988	-0.00877899	0.999799
ENSDARG00000011157	arhgef18a	-1.83649	0.0231493	0.426811	0.999799
ENSDARG00000011163	sema3fa	1.16353	0.274373	-0.842022	0.999799
ENSDARG00000011166	cahz	-1.67279	0.000577418	-0.0463437	0.999799
ENSDARG00000011170	ndrg2	-0.285197	0.844519	0.513195	0.999799
ENSDARG00000011171	si:ch211-12m10.1	0.673082	0.434004	-0.105292	0.999799
ENSDARG00000011188	acvr2aa	0.797955	0.637614	0.130105	0.999799
ENSDARG00000011201	rplp2l	-0.706293	0.137383	-0.273371	0.999799
ENSDARG00000011219	akt2	-0.291081	0.742394	0.407016	0.999799
ENSDARG00000011222	ccdc28b	0.507149	0.526247	0.74065	0.999799
ENSDARG00000011233	pcyt1aa	0.131297	0.901245	-0.686775	0.999799
ENSDARG00000011235	otx2b	0.147215	0.91669	-0.295541	0.999799
ENSDARG00000011239	ppp1r14aa	-0.00416753	0.997919	-0.226952	0.999799
ENSDARG00000011240	ift46	0.824832	0.150946	0.413649	0.999799
ENSDARG00000011245	esrp1	0.987905	#N/A	-0.342587	0.999799
ENSDARG00000011246	krr1	-1.0879	0.0982958	0.889817	0.999799
ENSDARG00000011247	rnpc3	-0.458008	0.781978	0.612902	0.999799
ENSDARG00000011257	enpp2	-0.212947	0.890084	-0.274387	0.999799
ENSDARG00000011259	trpm1a	0.935016	#N/A	0.45079	0.999799
ENSDARG00000011262	traip	-0.0346462	0.986634	-0.142407	0.999799
ENSDARG00000011273	tlx2	-0.851673	#N/A	-0.187694	0.999799
ENSDARG00000011298	atf7a	-0.271064	0.592171	0.304765	0.999799
ENSDARG00000011299	blzf1	0.664965	#N/A	-0.319723	0.999799
ENSDARG00000011301	nae1	-0.476131	0.483614	-0.288615	0.999799
ENSDARG00000011312	stk3	-0.56795	0.711332	0.264042	0.999799
ENSDARG00000011317	adra1ba	0.506858	0.629643	-1.01514	0.999799
ENSDARG00000011326	ankrd45	2.34849	0.000180386	0.182466	0.999799
ENSDARG00000011333	arhgap33	-0.209424	0.820051	0.364634	0.999799
ENSDARG00000011334	ncaldb	-0.214343	0.870176	-0.139467	0.999799
ENSDARG00000011360	nfatc2ip	-0.407711	#N/A	0.318385	0.999799
ENSDARG00000011370	fyna	0.0327511	0.971806	-0.127283	0.999799
ENSDARG00000011371	zgc:64106	-0.0948422	0.968204	0.225656	0.999799
ENSDARG00000011373	mknk2a	-0.0544987	0.951804	0.189547	0.999799
ENSDARG00000011376	dnase1l4.2	-2.75923	0.146117	0.296495	0.999799
ENSDARG00000011400	tnnc1a	1.07268	0.480324	-0.447638	0.999799
ENSDARG00000011404	fen1	0.0994725	0.909392	0.27911	0.999799
ENSDARG00000011405	rps9	-0.669279	0.0917722	0.442834	0.999799
ENSDARG00000011407	col2a1b	-0.0612539	0.961476	-0.116025	0.999799
ENSDARG00000011410	aadat	-0.856533	0.157304	0.179723	0.999799
ENSDARG00000011418	sigmar1	1.41918	#N/A	-0.183539	0.999799
ENSDARG00000011422	ryr1a	0.531412	#N/A	-0.520914	0.999799
ENSDARG00000011445	elmsan1a	0.633453	0.292616	-0.222148	0.999799
ENSDARG00000011449	fes	0.495881	0.581728	-0.0261622	0.999799
ENSDARG00000011459	gsna	0.647481	#N/A	0.162166	0.999799
ENSDARG00000011462	otub1b	-0.600306	0.684484	0.424134	0.999799
ENSDARG00000011463		-0.013288	#N/A	2.98178	0.999799
ENSDARG00000011466	afg1la	0.183315	#N/A	1.86872	0.999799
ENSDARG00000011473	calcrla	-0.872897	0.0682551	-0.231859	0.999799
ENSDARG00000011487	gnaq	0.330972	0.811288	-0.198947	0.999799
ENSDARG00000011488	sirt2	0.274326	0.83593	-0.216301	0.999799
ENSDARG00000011490	scube3	-0.26924	#N/A	-1.02268	0.999799
ENSDARG00000011493	dcun1d3	1.59621	0.133971	-0.695203	0.999799
ENSDARG00000011496	ppm1bb	-0.693167	0.0346395	0.420366	0.999799
ENSDARG00000011498	si:ch211-212o1.2	-0.68856	0.501801	0.0881233	0.999799
ENSDARG00000011506	lpcat1	-0.31283	0.758967	0.079175	0.999799
ENSDARG00000011510	rcc2	0.227306	0.831071	0.103606	0.999799
ENSDARG00000011515	orai1a	0.808487	0.584541	-0.723486	0.999799
ENSDARG00000011519	myl4	0.523958	#N/A	2.14902	0.999799
ENSDARG00000011521	upb1	-0.778165	0.540365	-0.470652	0.999799
ENSDARG00000011533	sema6dl	0.164311	0.885132	-0.037384	0.999799
ENSDARG00000011537	ugt2a5	-0.284007	0.808963	-0.308696	0.999799
ENSDARG00000011545	arrb2b	-0.416415	0.578563	0.447224	0.999799
ENSDARG00000011549	c1ql4a	-0.0757521	0.968624	-0.520164	0.999799
ENSDARG00000011553	atp5pb	-0.657351	0.418076	0.180328	0.999799
ENSDARG00000011555	spag7	-0.191809	0.811818	-0.289756	0.999799
ENSDARG00000011564	sfpq	0.0492035	0.979943	-0.200418	0.999799
ENSDARG00000011570	pou6f1	-0.487824	0.65101	-0.107734	0.999799
ENSDARG00000011571	calcrlb	-0.371091	0.709592	-0.203921	0.999799
ENSDARG00000011573	abcb11a	1.75239	#N/A	0.246282	0.999799
ENSDARG00000011579	hoxb10a	-0.272014	0.876211	-0.115551	0.999799
ENSDARG00000011581	si:dkey-23k10.5	0.590566	0.75823	0.0790424	0.999799
ENSDARG00000011582	sox5	0.126851	0.946965	0.255292	0.999799
ENSDARG00000011583	cry1ab	-0.414332	0.442353	0.188694	0.999799
ENSDARG00000011594	smarcb1b	-0.215277	0.776784	0.106745	0.999799
ENSDARG00000011597	atxn2l	-0.203266	0.624038	0.372926	0.999799
ENSDARG00000011600	epha4b	0.255579	0.825298	0.115379	0.999799
ENSDARG00000011602	si:dkeyp-117h8.2	1.11263	0.589928	-0.255933	0.999799
ENSDARG00000011605	dennd6b	-0.0819681	0.967655	-0.223437	0.999799
ENSDARG00000011609	si:ch211-262e15.1	-0.469654	0.0558026	0.185874	0.999799
ENSDARG00000011611	actr1	-0.549899	0.2867	0.00231995	0.999799
ENSDARG00000011613	rbm39a	0.241849	#N/A	-0.467862	0.999799
ENSDARG00000011615	mybpc3	0.502284	0.56114	0.0301167	0.999799
ENSDARG00000011618	slc26a2	0.881707	0.203145	-0.250734	0.999799
ENSDARG00000011635	scxb	0.289556	#N/A	0.252716	0.999799
ENSDARG00000011640	syt5b	0.54117	0.744591	0.236076	0.999799
ENSDARG00000011648	snrpd1	-0.941885	0.320982	0.389532	0.999799
ENSDARG00000011652	si:zfos-979f1.2	-0.0421367	#N/A	-0.539729	0.999799
ENSDARG00000011652	ftr52p	-0.0421367	#N/A	-0.539729	0.999799
ENSDARG00000011661	twf1b	0.583775	#N/A	1.24386	0.999799
ENSDARG00000011662	chuk	-0.117183	0.909754	-0.343302	0.999799
ENSDARG00000011672	sema3b	0.44781	#N/A	-0.518985	0.999799
ENSDARG00000011673	si:ch211-246m6.5	0.0880137	#N/A	0.976711	0.999799
ENSDARG00000011683	prtfdc1	0.71408	0.173085	-0.46102	0.999799
ENSDARG00000011693	ttc36	-0.144641	#N/A	0.754028	0.999799
ENSDARG00000011696	esrrgb	-1.51851	0.0920189	0.220765	0.999799
ENSDARG00000011701	ctsll	0.125046	0.95626	0.790578	0.999799
ENSDARG00000011703	clocka	-0.0374461	0.960879	0.136977	0.999799
ENSDARG00000011723	zgc:56556	-0.0344822	0.974998	0.290084	0.999799
ENSDARG00000011724	marveld1	0.59357	0.20716	0.233474	0.999799
ENSDARG00000011727	b9d1	-0.00426011	0.996797	0.142525	0.999799
ENSDARG00000011740	u2af2b	0.0203993	0.98245	-0.268831	0.999799
ENSDARG00000011743	pigo	-0.163363	0.870827	0.266943	0.999799
ENSDARG00000011764	ints13	0.0787275	#N/A	-1.5363	0.999799
ENSDARG00000011769	cpm	0.108302	#N/A	0.570339	0.999799
ENSDARG00000011770	dhrs12	-0.394302	0.391318	0.449261	0.999799
ENSDARG00000011777	cttn	0.946227	#N/A	0.189939	0.999799
ENSDARG00000011783	stag2a	-0.241813	#N/A	-0.089629	0.999799
ENSDARG00000011797	tent5bb	0.0892234	0.944408	-0.263056	0.999799
ENSDARG00000011801	wars2	0.85424	0.320136	0.235279	0.999799
ENSDARG00000011809	mical1	-0.605371	#N/A	-0.688103	0.999799
ENSDARG00000011818	batf	0.22465	0.897456	-0.119386	0.999799
ENSDARG00000011819	pcnx1	0.598924	0.707104	0.255145	0.999799
ENSDARG00000011821	plod2	-0.672324	0.611673	-0.251628	0.999799
ENSDARG00000011824	pbxip1b	-0.583476	0.522174	-0.257805	0.999799
ENSDARG00000011825	cetn3	-0.78198	0.488016	-0.0916768	0.999799
ENSDARG00000011837	zgc:100846	0.0690086	0.950245	0.399286	0.999799
ENSDARG00000011841	atp5l	-0.164782	0.858785	-0.360268	0.999799
ENSDARG00000011845	chn2	1.14265	0.000805769	0.0853643	0.999799
ENSDARG00000011851	map2k5	-0.689561	#N/A	0.251931	0.999799
ENSDARG00000011855	aak1a	-0.351945	0.781818	-0.188549	0.999799
ENSDARG00000011862	inaa	-0.000642842	0.999735	0.0115576	0.999799
ENSDARG00000011863	ptk7a	-0.262605	0.742394	0.163701	0.999799
ENSDARG00000011870	sp8a	-0.879878	0.292903	-0.774108	0.999799
ENSDARG00000011876	ednraa	-0.0707158	#N/A	-0.640417	0.999799
ENSDARG00000011879	foxn1	1.10065	#N/A	-0.702503	0.999799
ENSDARG00000011885	mrpl19	-0.718004	0.353442	-0.0504888	0.999799
ENSDARG00000011886	pdca	1.15002	#N/A	0.620991	0.999799
ENSDARG00000011890	cry4	-0.408337	0.257888	0.122472	0.999799
ENSDARG00000011897	tsg101b	0.870978	#N/A	-1.48814	0.999799
ENSDARG00000011909	itpr2	-0.428598	0.731782	0.256259	0.999799
ENSDARG00000011925	spns1	0.0603546	#N/A	0.846214	0.999799
ENSDARG00000011926	tpgs2	-0.0327292	0.960879	0.0128399	0.999799
ENSDARG00000011929	plp1b	0.435934	#N/A	-0.246205	0.999799
ENSDARG00000011932	prkcbp1l	-0.84716	0.000270146	0.477525	0.999799
ENSDARG00000011934	gyg1a	-0.17272	0.903445	0.107416	0.999799
ENSDARG00000011941	bmpr2a	0.173433	0.870362	-0.448973	0.999799
ENSDARG00000011945	slc35e1	0.444205	#N/A	-0.0995039	0.999799
ENSDARG00000011948	insra	-0.63021	0.379917	0.367574	0.999799
ENSDARG00000011956	dlx4a	-0.0053703	0.997476	-0.868864	0.999799
ENSDARG00000011958	ctnnbl1	-0.431091	0.567302	-0.273481	0.999799
ENSDARG00000011961	csrp2	0.802665	#N/A	0.420011	0.999799
ENSDARG00000011975	fmn1	-0.492364	#N/A	0.00742766	0.999799
ENSDARG00000011983	zgc:136908	1.93862	0.0634767	-0.297806	0.999799
ENSDARG00000011989	crx	-0.492127	0.743515	0.0267337	0.999799
ENSDARG00000011998	bfsp2	0.162336	0.949367	0.115224	0.999799
ENSDARG00000011999	ybey	-0.111388	#N/A	-1.40547	0.999799
ENSDARG00000012002	slc38a7	-0.335429	0.679752	-0.328961	0.999799
ENSDARG00000012005	mob2b	-0.75383	0.014093	-0.235968	0.999799
ENSDARG00000012013	cpa6	0.0202257	0.99113	-0.448129	0.999799
ENSDARG00000012016	hpgd	0.891138	0.413651	0.00226064	0.999799
ENSDARG00000012019	glra1	0.768196	0.311661	0.0443649	0.999799
ENSDARG00000012021	kdsr	0.664426	0.244477	-0.0714896	0.999799
ENSDARG00000012025	hs6st2	0.261189	0.834775	0.407202	0.999799
ENSDARG00000012030	dnaaf1	0.0883058	0.962219	-0.370969	0.999799
ENSDARG00000012035	zgc:100832	1.00731	#N/A	-0.116448	0.999799
ENSDARG00000012039	ttc26	0.383072	0.656397	-0.00192429	0.999799
ENSDARG00000012040	rnf19a	-0.133759	0.873184	0.456659	0.999799
ENSDARG00000012044	polr3gla	0.536293	0.66891	0.462195	0.999799
ENSDARG00000012051	mettl21a	0.00925421	0.994674	-0.130033	0.999799
ENSDARG00000012057	mtnr1al	-0.200926	#N/A	-0.360209	0.999799
ENSDARG00000012060	thbs3b	-0.66737	0.493941	-0.605243	0.999799
ENSDARG00000012066	dcn	0.378344	#N/A	-0.136436	0.999799
ENSDARG00000012072	atp5s	0.0102612	#N/A	0.479402	0.999799
ENSDARG00000012073	kif15	0.0242604	0.991727	0.153685	0.999799
ENSDARG00000012076	apoa1a	0.31352	0.868659	0.541793	0.999799
ENSDARG00000012078	meis1b	-0.0149705	0.985333	0.0267235	0.999799
ENSDARG00000012113	c19h1orf109	-0.623241	0.0447363	-0.0870416	0.999799
ENSDARG00000012126	zgc:109965	0.0148102	#N/A	0.0348449	0.999799
ENSDARG00000012135	fbxl2	-0.157871	0.874576	-0.5263	0.999799
ENSDARG00000012138	sgce	0.133521	0.928664	0.0497891	0.999799
ENSDARG00000012140	ccnl1b	-0.472644	0.522281	0.269789	0.999799
ENSDARG00000012141	papolg	0.312306	0.835573	-0.422627	0.999799
ENSDARG00000012144	emc7	-0.158367	0.862397	-0.0515283	0.999799
ENSDARG00000012177	rab4b	-2.40332	#N/A	1.96856	0.999799
ENSDARG00000012184	zgc:162872	0.147084	0.909392	-0.595064	0.999799
ENSDARG00000012192	cant1a	0.996274	#N/A	-0.285157	0.999799
ENSDARG00000012194	scp2a	0.532558	0.468018	-0.35953	0.999799
ENSDARG00000012196	fer	-0.000173892	0.999872	-0.0871268	0.999799
ENSDARG00000012199	gpt2	-0.768148	0.00978415	0.243375	0.999799
ENSDARG00000012204	si:dkey-166c18.1	1.49152	#N/A	-1.26781	0.999799
ENSDARG00000012215	umps	1.37761	0.2867	-0.336186	0.999799
ENSDARG00000012219	dpf2	0.369438	0.397168	0.278189	0.999799
ENSDARG00000012222	nup35	0.0156186	0.988698	-0.365289	0.999799
ENSDARG00000012234	psme3	-0.432072	0.75434	-0.0955292	0.999799
ENSDARG00000012244	ube2e3	-0.0972749	0.904312	-0.0498585	0.999799
ENSDARG00000012247	def6a	0.560323	0.528752	0.60812	0.999799
ENSDARG00000012248	rgma	-0.372612	0.615631	0.133603	0.999799
ENSDARG00000012269	clcn1b	3.0944	#N/A	-0.20364	0.999799
ENSDARG00000012271	tmem206	0.169753	0.772456	-0.0151042	0.999799
ENSDARG00000012275	katnal2	0.262199	0.866874	0.566839	0.999799
ENSDARG00000012281	zgc:65851	0.0978522	0.946768	-0.351749	0.999799
ENSDARG00000012295	bcs1l	1.01432	#N/A	-0.0649672	0.999799
ENSDARG00000012311	myoz2a	2.00036	#N/A	0.161711	0.999799
ENSDARG00000012314	usp25	-0.619703	0.139105	0.29331	0.999799
ENSDARG00000012340	ptpn11b	-0.485544	0.618541	0.513403	0.999799
ENSDARG00000012341	capn9	0.696852	#N/A	-0.30568	0.999799
ENSDARG00000012347	nacad	0.510047	#N/A	0.557196	0.999799
ENSDARG00000012353	vipr2	-0.143959	#N/A	-0.321704	0.999799
ENSDARG00000012366	fbp2	0.662781	0.473884	-0.0825702	0.999799
ENSDARG00000012367	trim46a	-0.738264	#N/A	0.517261	0.999799
ENSDARG00000012368	ttc21b	0.0936336	0.960765	-0.071832	0.999799
ENSDARG00000012369	rdh10b	-0.839007	0.48675	0.560372	0.999799
ENSDARG00000012378	naa35	-0.371014	0.799439	-0.476801	0.999799
ENSDARG00000012381	hsc70	-1.22687	#N/A	0.385804	0.999799
ENSDARG00000012387	pdha1a	-0.514947	0.582319	0.0213324	0.999799
ENSDARG00000012388	cox4i1l	-1.13437	0.0636454	-0.0533605	0.999799
ENSDARG00000012389	adar	-0.123377	0.909754	0.0459927	0.999799
ENSDARG00000012390	kcnk5b	-0.590166	0.481474	-0.512999	0.999799
ENSDARG00000012395	mmp13a	-0.333192	#N/A	0.0441952	0.999799
ENSDARG00000012397	eya4	0.497838	0.65145	-0.273137	0.999799
ENSDARG00000012399	adssl	0.0231218	0.983455	-0.25242	0.999799
ENSDARG00000012403	ercc6l2	0.44201	0.742007	0.0641245	0.999799
ENSDARG00000012405	col1a1a	0.591455	0.375471	0.12499	0.999799
ENSDARG00000012407	mgat1a	-0.538159	0.448409	-0.215352	0.999799
ENSDARG00000012409	rnf207b	0.27719	0.858452	0.45662	0.999799
ENSDARG00000012422	col11a2	-0.088108	0.950144	-0.105982	0.999799
ENSDARG00000012426	neflb	0.688062	0.350541	0.357292	0.999799
ENSDARG00000012432	fam76b	0.0718287	0.925368	0.339458	0.999799
ENSDARG00000012446	zgc:113057	1.16411	0.388285	-0.501124	0.999799
ENSDARG00000012449	si:ch211-169p10.1	-0.221538	0.698559	-0.050756	0.999799
ENSDARG00000012450	vmp1	0.0445276	0.965924	0.466789	0.999799
ENSDARG00000012453	rnls	0.272857	0.857076	0.195751	0.999799
ENSDARG00000012458	zgc:77849	-0.328816	0.325292	0.288845	0.999799
ENSDARG00000012460	rassf4	-1.0986	0.0138655	0.414882	0.999799
ENSDARG00000012467	spint1b	-0.402563	0.750196	0.237311	0.999799
ENSDARG00000012468	aacs	-0.730934	0.000891484	0.192769	0.999799
ENSDARG00000012485	aurka	-0.605506	0.0380329	0.170639	0.999799
ENSDARG00000012495	mphosph10	-0.185557	0.9102	0.493206	0.999799
ENSDARG00000012496	si:ch211-213o11.11	1.53177	0.100853	0.170595	0.999799
ENSDARG00000012499	per1b	-0.589438	0.0130008	0.516511	0.999799
ENSDARG00000012504	rlbp1a	0.61996	0.724745	0.420177	0.999799
ENSDARG00000012505	u2af2a	-0.779654	0.614437	1.11348	0.999799
ENSDARG00000012506	rnpep	-0.353302	0.467365	0.357048	0.999799
ENSDARG00000012513	sdcbp2	0.554048	0.218632	-0.323123	0.999799
ENSDARG00000012519	hcfc1b	-0.495167	0.567302	0.0588181	0.999799
ENSDARG00000012534	slc6a6a	-0.405763	0.781454	-0.173844	0.999799
ENSDARG00000012539	dnase1	-0.227053	#N/A	0.15246	0.999799
ENSDARG00000012553	rap1aa	-0.5915	0.33294	-0.324843	0.999799
ENSDARG00000012555	ak5	-1.01104	#N/A	1.1245	0.999799
ENSDARG00000012563	pdss2	0.0480504	#N/A	-0.631475	0.999799
ENSDARG00000012572	polr3f	0.659495	0.526401	-0.290544	0.999799
ENSDARG00000012574	slkb	-0.71518	0.425754	0.445573	0.999799
ENSDARG00000012577	waca	-0.552311	0.184939	0.500378	0.999799
ENSDARG00000012581		-0.405199	0.773481	0.28351	0.999799
ENSDARG00000012586	fmnl2a	0.0618776	0.92793	-0.115023	0.999799
ENSDARG00000012591	pdcd10b	-0.182191	0.921418	-0.126824	0.999799
ENSDARG00000012600	si:dkey-97a13.6	0.295674	0.841084	0.776182	0.999799
ENSDARG00000012609	hpx	0.60231	0.410872	-0.273639	0.999799
ENSDARG00000012610	saga	0.893513	0.592667	0.428796	0.999799
ENSDARG00000012625	prkag2a	-0.115455	0.905201	-0.0426711	0.999799
ENSDARG00000012627	cdc34b	0.465849	0.357876	-0.0730667	0.999799
ENSDARG00000012632	zgc:92749	-0.829464	0.0835587	-0.230356	0.999799
ENSDARG00000012642	si:ch211-266d19.4	-0.212363	0.887354	-0.117159	0.999799
ENSDARG00000012649	gb:cr929477	-0.450946	0.618494	-0.323057	0.999799
ENSDARG00000012656	atf6	-0.731925	0.177618	0.509444	0.999799
ENSDARG00000012667	tfap2b	-0.200518	0.851653	-0.378526	0.999799
ENSDARG00000012671	inhbaa	0.722293	0.208999	0.437117	0.999799
ENSDARG00000012672	gtf2e2	-0.0347317	0.982414	0.0217714	0.999799
ENSDARG00000012674	rpusd4	-0.152928	0.913857	-0.0233103	0.999799
ENSDARG00000012682	pfn2l	0.155044	0.846033	0.541507	0.999799
ENSDARG00000012684	atp2b1a	-0.649917	0.0492416	0.467278	0.999799
ENSDARG00000012688	eif1b	-0.0925125	0.911001	-0.0286789	0.999799
ENSDARG00000012699	bbx	0.172398	0.911228	-0.717223	0.999799
ENSDARG00000012718	wee2	0.225924	#N/A	0.0871569	0.999799
ENSDARG00000012723	rbm14a	-0.412381	0.721143	0.373327	0.999799
ENSDARG00000012726	calhm5.2	-1.11462	#N/A	-0.659022	0.999799
ENSDARG00000012729	hcls1	-0.507269	0.670577	0.3118	0.999799
ENSDARG00000012747	rer1	0.388037	0.346308	0.0298948	0.999799
ENSDARG00000012763	arl13b	-1.10016	0.000798364	0.109348	0.999799
ENSDARG00000012776	smarca1	0.11978	0.859343	-0.0566132	0.999799
ENSDARG00000012777	nucks1b	0.16954	0.909392	0.0466593	0.999799
ENSDARG00000012788	foxa3	-0.366661	0.728364	0.158496	0.999799
[truncated: 19,158 more rows]
