# Supplementary material for: Dynamics of cardiomyocyte transcriptome and chromatin landscape demarcates key events of heart development
Source: HighWire-hosted journal article supplement (doi:10.1101/gr.244491.118), 2019-02-13
Supplement: Supplement_Table_8.xlsx [file Supplement_Table_8.xlsx]

## Sheet: brown_module_edge
toAltName (ZFIN_ID_or_ENSEMBL_ID)	EdgeBetweenness	fromAltName	interaction	name	selected	shared interaction	shared name	weight	TF motif match
ENSDARG00000079036	1	rest	directed	ENSDARG00000103046 (directed) ENSDARG00000079036	false	directed	ENSDARG00000103046 (directed) ENSDARG00000079036	0.0197003	exact
rin3	1	rest	directed	ENSDARG00000103046 (directed) ENSDARG00000077618	false	directed	ENSDARG00000103046 (directed) ENSDARG00000077618	0.0276792	exact
irx5a	1	rest	directed	ENSDARG00000103046 (directed) ENSDARG00000034043	false	directed	ENSDARG00000103046 (directed) ENSDARG00000034043	0.0590239	exact
efnb2a	1	rest	directed	ENSDARG00000103046 (directed) ENSDARG00000020164	false	directed	ENSDARG00000103046 (directed) ENSDARG00000020164	0.0970991	exact
ccnt1	1	rest	directed	ENSDARG00000103046 (directed) ENSDARG00000017525	false	directed	ENSDARG00000103046 (directed) ENSDARG00000017525	0.0580267	exact
kat2a	3.12127	nfe2	directed	ENSDARG00000020606 (directed) ENSDARG00000104734	false	directed	ENSDARG00000020606 (directed) ENSDARG00000104734	0.108333	exact
ENSDARG00000104657	2.52097	nfe2	directed	ENSDARG00000020606 (directed) ENSDARG00000104657	false	directed	ENSDARG00000020606 (directed) ENSDARG00000104657	0.0472142	exact
ENSDARG00000102428	1.53254	nfe2	directed	ENSDARG00000020606 (directed) ENSDARG00000102428	false	directed	ENSDARG00000020606 (directed) ENSDARG00000102428	0.0466786	exact
psma1	1.12692	nfe2	directed	ENSDARG00000020606 (directed) ENSDARG00000101560	false	directed	ENSDARG00000020606 (directed) ENSDARG00000101560	0.0634861	exact
trrap	1.30202	nfe2	directed	ENSDARG00000020606 (directed) ENSDARG00000100623	true	directed	ENSDARG00000020606 (directed) ENSDARG00000100623	0.175851	exact
si:ch211-255a21.1	4.32857	nfe2	directed	ENSDARG00000020606 (directed) ENSDARG00000100573	false	directed	ENSDARG00000020606 (directed) ENSDARG00000100573	0.129447	exact
nploc4	2.52146	nfe2	directed	ENSDARG00000020606 (directed) ENSDARG00000100487	false	directed	ENSDARG00000020606 (directed) ENSDARG00000100487	0.0894912	exact
ENSDARG00000100031	1.76558	nfe2	directed	ENSDARG00000020606 (directed) ENSDARG00000100031	false	directed	ENSDARG00000020606 (directed) ENSDARG00000100031	0.0732168	exact
rbpms	2.26591	nfe2	directed	ENSDARG00000020606 (directed) ENSDARG00000099396	false	directed	ENSDARG00000020606 (directed) ENSDARG00000099396	0.0522851	exact
ENSDARG00000099091	2.28773	nfe2	directed	ENSDARG00000020606 (directed) ENSDARG00000099091	false	directed	ENSDARG00000020606 (directed) ENSDARG00000099091	0.0946504	exact
pdgfab	1.47273	nfe2	directed	ENSDARG00000020606 (directed) ENSDARG00000098578	false	directed	ENSDARG00000020606 (directed) ENSDARG00000098578	0.0952577	exact
ENSDARG00000097600	1.09091	nfe2	directed	ENSDARG00000020606 (directed) ENSDARG00000097600	false	directed	ENSDARG00000020606 (directed) ENSDARG00000097600	0.0361479	exact
blvrb	1.6968	nfe2	directed	ENSDARG00000020606 (directed) ENSDARG00000096829	false	directed	ENSDARG00000020606 (directed) ENSDARG00000096829	0.0964099	exact
ENSDARG00000094734	6.13553	nfe2	directed	ENSDARG00000020606 (directed) ENSDARG00000094734	false	directed	ENSDARG00000020606 (directed) ENSDARG00000094734	0.08447	exact
swsap1	2.70119	nfe2	directed	ENSDARG00000020606 (directed) ENSDARG00000093423	false	directed	ENSDARG00000020606 (directed) ENSDARG00000093423	0.0400874	exact
si:dkeyp-115e12.6	1.17424	nfe2	directed	ENSDARG00000020606 (directed) ENSDARG00000090986	false	directed	ENSDARG00000020606 (directed) ENSDARG00000090986	0.129027	exact
si:dkey-246i14.3	1.58393	nfe2	directed	ENSDARG00000020606 (directed) ENSDARG00000090427	false	directed	ENSDARG00000020606 (directed) ENSDARG00000090427	0.0679524	exact
gapvd1	1.51783	nfe2	directed	ENSDARG00000020606 (directed) ENSDARG00000090183	false	directed	ENSDARG00000020606 (directed) ENSDARG00000090183	0.106957	exact
notum2	1.60788	nfe2	directed	ENSDARG00000020606 (directed) ENSDARG00000088411	false	directed	ENSDARG00000020606 (directed) ENSDARG00000088411	0.0347086	exact
si:ch211-5k11.2	1.68634	nfe2	directed	ENSDARG00000020606 (directed) ENSDARG00000088330	true	directed	ENSDARG00000020606 (directed) ENSDARG00000088330	0.157892	exact
pik3c2b	1.19091	nfe2	directed	ENSDARG00000020606 (directed) ENSDARG00000086927	false	directed	ENSDARG00000020606 (directed) ENSDARG00000086927	0.132799	exact
si:ch211-266i6.3	3.12424	nfe2	directed	ENSDARG00000020606 (directed) ENSDARG00000086112	false	directed	ENSDARG00000020606 (directed) ENSDARG00000086112	0.0913599	exact
ENSDARG00000086052	2.42468	nfe2	directed	ENSDARG00000020606 (directed) ENSDARG00000086052	false	directed	ENSDARG00000020606 (directed) ENSDARG00000086052	0.0955222	exact
arhgap19	2.03734	nfe2	directed	ENSDARG00000020606 (directed) ENSDARG00000083189	true	directed	ENSDARG00000020606 (directed) ENSDARG00000083189	0.151686	exact
ppp1r16b	5.72063	nfe2	directed	ENSDARG00000020606 (directed) ENSDARG00000079860	false	directed	ENSDARG00000020606 (directed) ENSDARG00000079860	0.10202	exact
herc1	2.61091	nfe2	directed	ENSDARG00000020606 (directed) ENSDARG00000077901	false	directed	ENSDARG00000020606 (directed) ENSDARG00000077901	0.0704501	exact
hmgxb3	3.99405	nfe2	directed	ENSDARG00000020606 (directed) ENSDARG00000077823	false	directed	ENSDARG00000020606 (directed) ENSDARG00000077823	0.102972	exact
esama	1.78377	nfe2	directed	ENSDARG00000020606 (directed) ENSDARG00000077039	false	directed	ENSDARG00000020606 (directed) ENSDARG00000077039	0.109709	exact
dusp12	1	nfe2	directed	ENSDARG00000020606 (directed) ENSDARG00000076330	false	directed	ENSDARG00000020606 (directed) ENSDARG00000076330	0.0377691	exact
dlk2	1.53611	nfe2	directed	ENSDARG00000020606 (directed) ENSDARG00000076247	false	directed	ENSDARG00000020606 (directed) ENSDARG00000076247	0.0408359	exact
si:dkey-219c3.2	1.57702	nfe2	directed	ENSDARG00000020606 (directed) ENSDARG00000075805	false	directed	ENSDARG00000020606 (directed) ENSDARG00000075805	0.111267	exact
larp4ab	2.9017	nfe2	directed	ENSDARG00000020606 (directed) ENSDARG00000074979	false	directed	ENSDARG00000020606 (directed) ENSDARG00000074979	0.103205	exact
ccar1	1.70245	nfe2	directed	ENSDARG00000020606 (directed) ENSDARG00000074759	false	directed	ENSDARG00000020606 (directed) ENSDARG00000074759	0.112355	exact
si:dkey-85p17.3	1.75441	nfe2	directed	ENSDARG00000020606 (directed) ENSDARG00000070601	false	directed	ENSDARG00000020606 (directed) ENSDARG00000070601	0.13746	exact
tmem160	1.41071	nfe2	directed	ENSDARG00000020606 (directed) ENSDARG00000069649	false	directed	ENSDARG00000020606 (directed) ENSDARG00000069649	0.10628	exact
emp1	1.38952	nfe2	directed	ENSDARG00000020606 (directed) ENSDARG00000069632	false	directed	ENSDARG00000020606 (directed) ENSDARG00000069632	0.040067	exact
cdk12	1	nfe2	directed	ENSDARG00000020606 (directed) ENSDARG00000063726	true	directed	ENSDARG00000020606 (directed) ENSDARG00000063726	0.166717	exact
sgk2a	1.09091	nfe2	directed	ENSDARG00000020606 (directed) ENSDARG00000063370	false	directed	ENSDARG00000020606 (directed) ENSDARG00000063370	0.0877088	exact
tyw1	1	nfe2	directed	ENSDARG00000020606 (directed) ENSDARG00000062987	false	directed	ENSDARG00000020606 (directed) ENSDARG00000062987	0.0952015	exact
las1l	3.65833	nfe2	directed	ENSDARG00000020606 (directed) ENSDARG00000062457	false	directed	ENSDARG00000020606 (directed) ENSDARG00000062457	0.13226	exact
abtb2b	1.29444	nfe2	directed	ENSDARG00000020606 (directed) ENSDARG00000062000	false	directed	ENSDARG00000020606 (directed) ENSDARG00000062000	0.0559519	exact
dis3	5.56787	nfe2	directed	ENSDARG00000020606 (directed) ENSDARG00000060559	false	directed	ENSDARG00000020606 (directed) ENSDARG00000060559	0.0724963	exact
btaf1	1.05882	nfe2	directed	ENSDARG00000020606 (directed) ENSDARG00000060089	false	directed	ENSDARG00000020606 (directed) ENSDARG00000060089	0.0949633	exact
si:dkey-119f1.1	2.39881	nfe2	directed	ENSDARG00000020606 (directed) ENSDARG00000058719	false	directed	ENSDARG00000020606 (directed) ENSDARG00000058719	0.0372681	exact
dnmt3bb.2	1.26074	nfe2	directed	ENSDARG00000020606 (directed) ENSDARG00000057830	false	directed	ENSDARG00000020606 (directed) ENSDARG00000057830	0.117682	exact
mastl	2.02345	nfe2	directed	ENSDARG00000020606 (directed) ENSDARG00000055566	false	directed	ENSDARG00000020606 (directed) ENSDARG00000055566	0.107735	exact
plekhh1	1.09091	nfe2	directed	ENSDARG00000020606 (directed) ENSDARG00000053835	false	directed	ENSDARG00000020606 (directed) ENSDARG00000053835	0.132037	exact
gtpbp1	1	nfe2	directed	ENSDARG00000020606 (directed) ENSDARG00000053467	false	directed	ENSDARG00000020606 (directed) ENSDARG00000053467	0.122919	exact
fhod1	1.09091	nfe2	directed	ENSDARG00000020606 (directed) ENSDARG00000051768	false	directed	ENSDARG00000020606 (directed) ENSDARG00000051768	0.0760666	exact
mllt10	2.28889	nfe2	directed	ENSDARG00000020606 (directed) ENSDARG00000045401	true	directed	ENSDARG00000020606 (directed) ENSDARG00000045401	0.177816	exact
lmnb1	2.01145	nfe2	directed	ENSDARG00000020606 (directed) ENSDARG00000044299	true	directed	ENSDARG00000020606 (directed) ENSDARG00000044299	0.195512	exact
elmo3	1.3631	nfe2	directed	ENSDARG00000020606 (directed) ENSDARG00000042126	false	directed	ENSDARG00000020606 (directed) ENSDARG00000042126	0.0159763	exact
dhx40	3.57302	nfe2	directed	ENSDARG00000020606 (directed) ENSDARG00000041586	false	directed	ENSDARG00000020606 (directed) ENSDARG00000041586	0.091061	exact
nrp2b	1.23611	nfe2	directed	ENSDARG00000020606 (directed) ENSDARG00000038446	false	directed	ENSDARG00000020606 (directed) ENSDARG00000038446	0.133439	exact
has2	1	nfe2	directed	ENSDARG00000020606 (directed) ENSDARG00000036987	false	directed	ENSDARG00000020606 (directed) ENSDARG00000036987	0.0921716	exact
trmt10a	3.81349	nfe2	directed	ENSDARG00000020606 (directed) ENSDARG00000036678	false	directed	ENSDARG00000020606 (directed) ENSDARG00000036678	0.0311258	exact
slit3	1.39286	nfe2	directed	ENSDARG00000020606 (directed) ENSDARG00000034268	false	directed	ENSDARG00000020606 (directed) ENSDARG00000034268	0.143789	exact
npr1a	1.07692	nfe2	directed	ENSDARG00000020606 (directed) ENSDARG00000031751	false	directed	ENSDARG00000020606 (directed) ENSDARG00000031751	0.111814	exact
grtp1a	1.85209	nfe2	directed	ENSDARG00000020606 (directed) ENSDARG00000029936	false	directed	ENSDARG00000020606 (directed) ENSDARG00000029936	0.099461	exact
gmds	2.37302	nfe2	directed	ENSDARG00000020606 (directed) ENSDARG00000026629	false	directed	ENSDARG00000020606 (directed) ENSDARG00000026629	0.0610331	exact
ENSDARG00000025699	1.94643	nfe2	directed	ENSDARG00000020606 (directed) ENSDARG00000025699	false	directed	ENSDARG00000020606 (directed) ENSDARG00000025699	0.0556581	exact
ntmt1	1.2	nfe2	directed	ENSDARG00000020606 (directed) ENSDARG00000022399	false	directed	ENSDARG00000020606 (directed) ENSDARG00000022399	0.0637333	exact
tab2	1.35819	nfe2	directed	ENSDARG00000020606 (directed) ENSDARG00000021509	false	directed	ENSDARG00000020606 (directed) ENSDARG00000021509	0.104964	exact
smpd4	2.18373	nfe2	directed	ENSDARG00000020606 (directed) ENSDARG00000020730	false	directed	ENSDARG00000020606 (directed) ENSDARG00000020730	0.108298	exact
nkd1	1.52778	nfe2	directed	ENSDARG00000020606 (directed) ENSDARG00000020053	false	directed	ENSDARG00000020606 (directed) ENSDARG00000020053	0.13806	exact
bmpr1aa	2.42821	nfe2	directed	ENSDARG00000020606 (directed) ENSDARG00000019728	false	directed	ENSDARG00000020606 (directed) ENSDARG00000019728	0.145167	exact
senp8	8.09825	nfe2	directed	ENSDARG00000020606 (directed) ENSDARG00000019595	false	directed	ENSDARG00000020606 (directed) ENSDARG00000019595	0.0374856	exact
elk3	862.839	nfe2	directed	ENSDARG00000020606 (directed) ENSDARG00000018688	false	directed	ENSDARG00000020606 (directed) ENSDARG00000018688	0.0510702	exact
cenpj	1.29167	nfe2	directed	ENSDARG00000020606 (directed) ENSDARG00000018121	false	directed	ENSDARG00000020606 (directed) ENSDARG00000018121	0.089562	exact
kdr	1.24835	nfe2	directed	ENSDARG00000020606 (directed) ENSDARG00000017321	false	directed	ENSDARG00000020606 (directed) ENSDARG00000017321	0.117404	exact
huwe1	1.39005	nfe2	directed	ENSDARG00000020606 (directed) ENSDARG00000016782	false	directed	ENSDARG00000020606 (directed) ENSDARG00000016782	0.106422	exact
tmem110	1.34722	nfe2	directed	ENSDARG00000020606 (directed) ENSDARG00000013694	false	directed	ENSDARG00000020606 (directed) ENSDARG00000013694	0.105341	exact
waca	1.7298	nfe2	directed	ENSDARG00000020606 (directed) ENSDARG00000012577	true	directed	ENSDARG00000020606 (directed) ENSDARG00000012577	0.165617	exact
aak1a	2.17153	nfe2	directed	ENSDARG00000020606 (directed) ENSDARG00000011855	false	directed	ENSDARG00000020606 (directed) ENSDARG00000011855	0.0702754	exact
ENSDARG00000010934	4.17063	nfe2	directed	ENSDARG00000020606 (directed) ENSDARG00000010934	false	directed	ENSDARG00000020606 (directed) ENSDARG00000010934	0.0918565	exact
tlk2	1.3875	nfe2	directed	ENSDARG00000020606 (directed) ENSDARG00000010779	false	directed	ENSDARG00000020606 (directed) ENSDARG00000010779	0.116491	exact
tbx6l	1019.01	nfe2	directed	ENSDARG00000020606 (directed) ENSDARG00000006939	false	directed	ENSDARG00000020606 (directed) ENSDARG00000006939	0.112617	exact
impdh2	1.25	nfe2	directed	ENSDARG00000020606 (directed) ENSDARG00000006900	false	directed	ENSDARG00000020606 (directed) ENSDARG00000006900	0.0987903	exact
urod	1.54237	nfe2	directed	ENSDARG00000020606 (directed) ENSDARG00000006818	false	directed	ENSDARG00000020606 (directed) ENSDARG00000006818	0.0250436	exact
ppp2r2ab	3.04167	nfe2	directed	ENSDARG00000020606 (directed) ENSDARG00000006624	false	directed	ENSDARG00000020606 (directed) ENSDARG00000006624	0.0956416	exact
ell2	2.29386	nfe2	directed	ENSDARG00000020606 (directed) ENSDARG00000006251	false	directed	ENSDARG00000020606 (directed) ENSDARG00000006251	0.0719895	exact
xpo7	2.72348	nfe2	directed	ENSDARG00000020606 (directed) ENSDARG00000005540	false	directed	ENSDARG00000020606 (directed) ENSDARG00000005540	0.142651	exact
psmd11b	1.48025	nfe2	directed	ENSDARG00000020606 (directed) ENSDARG00000005134	false	directed	ENSDARG00000020606 (directed) ENSDARG00000005134	0.0451032	exact
cep89	2.79815	nfe2	directed	ENSDARG00000020606 (directed) ENSDARG00000005092	true	directed	ENSDARG00000020606 (directed) ENSDARG00000005092	0.171764	exact
cnot1	1.18333	nfe2	directed	ENSDARG00000020606 (directed) ENSDARG00000004174	true	directed	ENSDARG00000020606 (directed) ENSDARG00000004174	0.165109	exact
psmd1	1.94118	nfe2	directed	ENSDARG00000020606 (directed) ENSDARG00000003189	false	directed	ENSDARG00000020606 (directed) ENSDARG00000003189	0.0632774	exact
rnf145a	1.45	nfe2	directed	ENSDARG00000020606 (directed) ENSDARG00000002609	true	directed	ENSDARG00000020606 (directed) ENSDARG00000002609	0.183477	exact
arhgef37	1.63912	nfe2	directed	ENSDARG00000020606 (directed) ENSDARG00000002463	false	directed	ENSDARG00000020606 (directed) ENSDARG00000002463	0.0922614	exact
LOC100535210	1.97339	ctcf	directed	ENSDARG00000056621 (directed) ENSDARG00000103711	false	directed	ENSDARG00000056621 (directed) ENSDARG00000103711	0.0974321	exact
ENSDARG00000102428	1.32143	ctcf	directed	ENSDARG00000056621 (directed) ENSDARG00000102428	false	directed	ENSDARG00000056621 (directed) ENSDARG00000102428	0.0809512	exact
ENSDARG00000102117	1.38889	ctcf	directed	ENSDARG00000056621 (directed) ENSDARG00000102117	false	directed	ENSDARG00000056621 (directed) ENSDARG00000102117	0.0544889	exact
trrap	1.30428	ctcf	directed	ENSDARG00000056621 (directed) ENSDARG00000100623	true	directed	ENSDARG00000056621 (directed) ENSDARG00000100623	0.197024	exact
tubgcp6	2.71869	ctcf	directed	ENSDARG00000056621 (directed) ENSDARG00000100151	true	directed	ENSDARG00000056621 (directed) ENSDARG00000100151	0.155832	exact
ENSDARG00000100031	1.55265	ctcf	directed	ENSDARG00000056621 (directed) ENSDARG00000100031	false	directed	ENSDARG00000056621 (directed) ENSDARG00000100031	0.0775291	exact
ENSDARG00000098503	1.46348	ctcf	directed	ENSDARG00000056621 (directed) ENSDARG00000098503	false	directed	ENSDARG00000056621 (directed) ENSDARG00000098503	0.114749	exact
ENSDARG00000093469	1.4	ctcf	directed	ENSDARG00000056621 (directed) ENSDARG00000093469	false	directed	ENSDARG00000056621 (directed) ENSDARG00000093469	0.0920202	exact
gapvd1	1.13942	ctcf	directed	ENSDARG00000056621 (directed) ENSDARG00000090183	false	directed	ENSDARG00000056621 (directed) ENSDARG00000090183	0.120885	exact
si:ch211-168f7.5	1.16059	ctcf	directed	ENSDARG00000056621 (directed) ENSDARG00000088195	true	directed	ENSDARG00000056621 (directed) ENSDARG00000088195	0.174676	exact
arhgap19	1.98575	ctcf	directed	ENSDARG00000056621 (directed) ENSDARG00000083189	true	directed	ENSDARG00000056621 (directed) ENSDARG00000083189	0.175394	exact
gfi1b	1886.04	ctcf	directed	ENSDARG00000056621 (directed) ENSDARG00000079947	false	directed	ENSDARG00000056621 (directed) ENSDARG00000079947	0.106763	exact
ENSDARG00000079688	1.24286	ctcf	directed	ENSDARG00000056621 (directed) ENSDARG00000079688	false	directed	ENSDARG00000056621 (directed) ENSDARG00000079688	0.141593	exact
tjp1b	1.70311	ctcf	directed	ENSDARG00000056621 (directed) ENSDARG00000079374	false	directed	ENSDARG00000056621 (directed) ENSDARG00000079374	0.114034	exact
trip11	2.28813	ctcf	directed	ENSDARG00000056621 (directed) ENSDARG00000078381	false	directed	ENSDARG00000056621 (directed) ENSDARG00000078381	0.0899259	exact
rin3	1.25556	ctcf	directed	ENSDARG00000056621 (directed) ENSDARG00000077618	false	directed	ENSDARG00000056621 (directed) ENSDARG00000077618	0.0459047	exact
blm	1.10263	ctcf	directed	ENSDARG00000056621 (directed) ENSDARG00000077089	false	directed	ENSDARG00000056621 (directed) ENSDARG00000077089	0.138109	exact
palb2	1.29286	ctcf	directed	ENSDARG00000056621 (directed) ENSDARG00000076716	false	directed	ENSDARG00000056621 (directed) ENSDARG00000076716	0.111857	exact
LOC108180085	1	ctcf	directed	ENSDARG00000056621 (directed) ENSDARG00000076609	false	directed	ENSDARG00000056621 (directed) ENSDARG00000076609	0.0553745	exact
kif20ba	1.57778	ctcf	directed	ENSDARG00000056621 (directed) ENSDARG00000071009	true	directed	ENSDARG00000056621 (directed) ENSDARG00000071009	0.164526	exact
si:ch211-107n13.1	1.1	ctcf	directed	ENSDARG00000056621 (directed) ENSDARG00000062517	false	directed	ENSDARG00000056621 (directed) ENSDARG00000062517	0.135944	exact
pcm1	1.89841	ctcf	directed	ENSDARG00000056621 (directed) ENSDARG00000062198	false	directed	ENSDARG00000056621 (directed) ENSDARG00000062198	0.12395	exact
kmt2bb	1.15476	ctcf	directed	ENSDARG00000056621 (directed) ENSDARG00000060697	true	directed	ENSDARG00000056621 (directed) ENSDARG00000060697	0.175759	exact
alkbh8	1.46502	ctcf	directed	ENSDARG00000056621 (directed) ENSDARG00000060256	false	directed	ENSDARG00000056621 (directed) ENSDARG00000060256	0.0632936	exact
dnajc8	2.58899	ctcf	directed	ENSDARG00000056621 (directed) ENSDARG00000059373	false	directed	ENSDARG00000056621 (directed) ENSDARG00000059373	0.0940108	exact
si:ch211-248e11.2	1.66234	ctcf	directed	ENSDARG00000056621 (directed) ENSDARG00000058940	false	directed	ENSDARG00000056621 (directed) ENSDARG00000058940	0.103053	exact
ncl1	1.25833	ctcf	directed	ENSDARG00000056621 (directed) ENSDARG00000058861	false	directed	ENSDARG00000056621 (directed) ENSDARG00000058861	0.0821308	exact
cep350	1.95	ctcf	directed	ENSDARG00000056621 (directed) ENSDARG00000058000	false	directed	ENSDARG00000056621 (directed) ENSDARG00000058000	0.0977379	exact
si:ch73-61d6.3	1.12238	ctcf	directed	ENSDARG00000056621 (directed) ENSDARG00000057826	false	directed	ENSDARG00000056621 (directed) ENSDARG00000057826	0.113263	exact
lyz	2.40516	ctcf	directed	ENSDARG00000056621 (directed) ENSDARG00000057789	false	directed	ENSDARG00000056621 (directed) ENSDARG00000057789	0.11496	exact
prrc2c	1.125	ctcf	directed	ENSDARG00000056621 (directed) ENSDARG00000057583	false	directed	ENSDARG00000056621 (directed) ENSDARG00000057583	0.129909	exact
rnasen	3.67063	ctcf	directed	ENSDARG00000056621 (directed) ENSDARG00000055563	true	directed	ENSDARG00000056621 (directed) ENSDARG00000055563	0.163141	exact
ccnl1a	1.58734	ctcf	directed	ENSDARG00000056621 (directed) ENSDARG00000055124	false	directed	ENSDARG00000056621 (directed) ENSDARG00000055124	0.0877996	exact
pds5a	1.21267	ctcf	directed	ENSDARG00000056621 (directed) ENSDARG00000055022	false	directed	ENSDARG00000056621 (directed) ENSDARG00000055022	0.12686	exact
sec13	1.775	ctcf	directed	ENSDARG00000056621 (directed) ENSDARG00000054807	false	directed	ENSDARG00000056621 (directed) ENSDARG00000054807	0.117733	exact
aplnrb	1	ctcf	directed	ENSDARG00000056621 (directed) ENSDARG00000036670	false	directed	ENSDARG00000056621 (directed) ENSDARG00000036670	0.147518	exact
polr2j	2.69167	ctcf	directed	ENSDARG00000056621 (directed) ENSDARG00000035146	false	directed	ENSDARG00000056621 (directed) ENSDARG00000035146	0.043807	exact
slit3	1.32143	ctcf	directed	ENSDARG00000056621 (directed) ENSDARG00000034268	true	directed	ENSDARG00000056621 (directed) ENSDARG00000034268	0.160918	exact
ube2j1	2.31869	ctcf	directed	ENSDARG00000056621 (directed) ENSDARG00000033489	false	directed	ENSDARG00000056621 (directed) ENSDARG00000033489	0.0952723	exact
melk	1.33333	ctcf	directed	ENSDARG00000056621 (directed) ENSDARG00000030759	false	directed	ENSDARG00000056621 (directed) ENSDARG00000030759	0.149508	exact
rexo1	1.18393	ctcf	directed	ENSDARG00000056621 (directed) ENSDARG00000026986	false	directed	ENSDARG00000056621 (directed) ENSDARG00000026986	0.139991	exact
adra1d	2.19518	ctcf	directed	ENSDARG00000056621 (directed) ENSDARG00000024101	false	directed	ENSDARG00000056621 (directed) ENSDARG00000024101	0.140325	exact
ewsr1a	1.68254	ctcf	directed	ENSDARG00000056621 (directed) ENSDARG00000020258	false	directed	ENSDARG00000056621 (directed) ENSDARG00000020258	0.128714	exact
tlr4ba	1.5718	ctcf	directed	ENSDARG00000056621 (directed) ENSDARG00000019742	false	directed	ENSDARG00000056621 (directed) ENSDARG00000019742	0.12034	exact
smarcc1a	1.37778	ctcf	directed	ENSDARG00000056621 (directed) ENSDARG00000017397	true	directed	ENSDARG00000056621 (directed) ENSDARG00000017397	0.185092	exact
smcr8b	1	ctcf	directed	ENSDARG00000056621 (directed) ENSDARG00000015803	false	directed	ENSDARG00000056621 (directed) ENSDARG00000015803	0.0833308	exact
lims2	2.14286	ctcf	directed	ENSDARG00000056621 (directed) ENSDARG00000014976	false	directed	ENSDARG00000056621 (directed) ENSDARG00000014976	0.111426	exact
znf76	1.11688	ctcf	directed	ENSDARG00000056621 (directed) ENSDARG00000013279	false	directed	ENSDARG00000056621 (directed) ENSDARG00000013279	0.0858258	exact
kif11	2.03333	ctcf	directed	ENSDARG00000056621 (directed) ENSDARG00000010948	true	directed	ENSDARG00000056621 (directed) ENSDARG00000010948	0.173511	exact
chrm1b	2.08651	ctcf	directed	ENSDARG00000056621 (directed) ENSDARG00000009121	false	directed	ENSDARG00000056621 (directed) ENSDARG00000009121	0.0548191	exact
rcor2	1	ctcf	directed	ENSDARG00000056621 (directed) ENSDARG00000008278	false	directed	ENSDARG00000056621 (directed) ENSDARG00000008278	0.11864	exact
slc25a39	1.85758	ctcf	directed	ENSDARG00000056621 (directed) ENSDARG00000007449	false	directed	ENSDARG00000056621 (directed) ENSDARG00000007449	0.0913785	exact
arid2	2.10278	ctcf	directed	ENSDARG00000056621 (directed) ENSDARG00000007413	true	directed	ENSDARG00000056621 (directed) ENSDARG00000007413	0.233346	exact
brd3a	5.21786	ctcf	directed	ENSDARG00000056621 (directed) ENSDARG00000006527	true	directed	ENSDARG00000056621 (directed) ENSDARG00000006527	0.19222	exact
mpp5a	8.26905	ctcf	directed	ENSDARG00000056621 (directed) ENSDARG00000006272	false	directed	ENSDARG00000056621 (directed) ENSDARG00000006272	0.101222	exact
cnot1	1	ctcf	directed	ENSDARG00000056621 (directed) ENSDARG00000004174	true	directed	ENSDARG00000056621 (directed) ENSDARG00000004174	0.184179	exact
arhgef37	1.83509	ctcf	directed	ENSDARG00000056621 (directed) ENSDARG00000002463	false	directed	ENSDARG00000056621 (directed) ENSDARG00000002463	0.101333	exact
rhd	1.05	ctcf	directed	ENSDARG00000056621 (directed) ENSDARG00000002194	false	directed	ENSDARG00000056621 (directed) ENSDARG00000002194	0.126207	exact
ENSDARG00000105496	2.40043	gfi1b	directed	ENSDARG00000079947 (directed) ENSDARG00000105496	false	directed	ENSDARG00000079947 (directed) ENSDARG00000105496	0.0745531	exact
ENSDARG00000105484	2.44551	gfi1b	directed	ENSDARG00000079947 (directed) ENSDARG00000105484	true	directed	ENSDARG00000079947 (directed) ENSDARG00000105484	0.158978	exact
si:ch73-368j24.11	8.27273	gfi1b	directed	ENSDARG00000079947 (directed) ENSDARG00000105430	false	directed	ENSDARG00000079947 (directed) ENSDARG00000105430	0.102373	exact
zgc:112234	3.1504	gfi1b	directed	ENSDARG00000079947 (directed) ENSDARG00000105393	false	directed	ENSDARG00000079947 (directed) ENSDARG00000105393	0.113475	exact
ENSDARG00000105359	2.82107	gfi1b	directed	ENSDARG00000079947 (directed) ENSDARG00000105359	false	directed	ENSDARG00000079947 (directed) ENSDARG00000105359	0.133723	exact
ENSDARG00000105294	2.4006	gfi1b	directed	ENSDARG00000079947 (directed) ENSDARG00000105294	false	directed	ENSDARG00000079947 (directed) ENSDARG00000105294	0.0691362	exact
kdrl	2.12692	gfi1b	directed	ENSDARG00000079947 (directed) ENSDARG00000105215	false	directed	ENSDARG00000079947 (directed) ENSDARG00000105215	0.0879728	exact
creg1	2.95833	gfi1b	directed	ENSDARG00000079947 (directed) ENSDARG00000105154	false	directed	ENSDARG00000079947 (directed) ENSDARG00000105154	0.0680327	exact
trim35-7	2.76577	gfi1b	directed	ENSDARG00000079947 (directed) ENSDARG00000104825	false	directed	ENSDARG00000079947 (directed) ENSDARG00000104825	0.116694	exact
abcc1	2.62812	gfi1b	directed	ENSDARG00000079947 (directed) ENSDARG00000104719	false	directed	ENSDARG00000079947 (directed) ENSDARG00000104719	0.0400713	exact
kirrel3l	2.41154	gfi1b	directed	ENSDARG00000079947 (directed) ENSDARG00000104665	false	directed	ENSDARG00000079947 (directed) ENSDARG00000104665	0.098166	exact
LOC100329290	2.37876	gfi1b	directed	ENSDARG00000079947 (directed) ENSDARG00000104554	false	directed	ENSDARG00000079947 (directed) ENSDARG00000104554	0.134995	exact
LOC100329560	2.59771	gfi1b	directed	ENSDARG00000079947 (directed) ENSDARG00000104501	false	directed	ENSDARG00000079947 (directed) ENSDARG00000104501	0.119892	exact
smchd1	2.71429	gfi1b	directed	ENSDARG00000079947 (directed) ENSDARG00000104374	false	directed	ENSDARG00000079947 (directed) ENSDARG00000104374	0.136546	exact
zgc:154064	2.72736	gfi1b	directed	ENSDARG00000079947 (directed) ENSDARG00000104316	false	directed	ENSDARG00000079947 (directed) ENSDARG00000104316	0.0698882	exact
zgc:63733	3.04207	gfi1b	directed	ENSDARG00000079947 (directed) ENSDARG00000104285	false	directed	ENSDARG00000079947 (directed) ENSDARG00000104285	0.0591741	exact
si:dkey-43p13.5	2.67778	gfi1b	directed	ENSDARG00000079947 (directed) ENSDARG00000104199	false	directed	ENSDARG00000079947 (directed) ENSDARG00000104199	0.0957403	exact
si:ch211-212k18.4	2.27361	gfi1b	directed	ENSDARG00000079947 (directed) ENSDARG00000104169	false	directed	ENSDARG00000079947 (directed) ENSDARG00000104169	0.0980281	exact
fzd4	2.05882	gfi1b	directed	ENSDARG00000079947 (directed) ENSDARG00000104117	false	directed	ENSDARG00000079947 (directed) ENSDARG00000104117	0.0798864	exact
ttf2	3.86071	gfi1b	directed	ENSDARG00000079947 (directed) ENSDARG00000104105	false	directed	ENSDARG00000079947 (directed) ENSDARG00000104105	0.098042	exact
spry1	4.57662	gfi1b	directed	ENSDARG00000079947 (directed) ENSDARG00000103985	false	directed	ENSDARG00000079947 (directed) ENSDARG00000103985	0.098686	exact
sgol1	2.6	gfi1b	directed	ENSDARG00000079947 (directed) ENSDARG00000103907	false	directed	ENSDARG00000079947 (directed) ENSDARG00000103907	0.138328	exact
ENSDARG00000103841	14.3901	gfi1b	directed	ENSDARG00000079947 (directed) ENSDARG00000103841	false	directed	ENSDARG00000079947 (directed) ENSDARG00000103841	0.0582845	exact
aspm	3.38004	gfi1b	directed	ENSDARG00000079947 (directed) ENSDARG00000103754	true	directed	ENSDARG00000079947 (directed) ENSDARG00000103754	0.169673	exact
cirbpa	2.81647	gfi1b	directed	ENSDARG00000079947 (directed) ENSDARG00000103672	false	directed	ENSDARG00000079947 (directed) ENSDARG00000103672	0.0960036	exact
gtf2b	2.61587	gfi1b	directed	ENSDARG00000079947 (directed) ENSDARG00000103578	false	directed	ENSDARG00000079947 (directed) ENSDARG00000103578	0.0844963	exact
sec24c	2.23377	gfi1b	directed	ENSDARG00000079947 (directed) ENSDARG00000103516	false	directed	ENSDARG00000079947 (directed) ENSDARG00000103516	0.036826	exact
si:ch211-212k18.5	2.27778	gfi1b	directed	ENSDARG00000079947 (directed) ENSDARG00000103316	false	directed	ENSDARG00000079947 (directed) ENSDARG00000103316	0.12608	exact
si:ch211-221j21.3	2.17778	gfi1b	directed	ENSDARG00000079947 (directed) ENSDARG00000103294	false	directed	ENSDARG00000079947 (directed) ENSDARG00000103294	0.0680083	exact
stoml2	2.56264	gfi1b	directed	ENSDARG00000079947 (directed) ENSDARG00000103135	false	directed	ENSDARG00000079947 (directed) ENSDARG00000103135	0.0548633	exact
LOC100331938	2.375	gfi1b	directed	ENSDARG00000079947 (directed) ENSDARG00000103108	false	directed	ENSDARG00000079947 (directed) ENSDARG00000103108	0.146104	exact
si:dkey-237i9.8	2.86111	gfi1b	directed	ENSDARG00000079947 (directed) ENSDARG00000103020	false	directed	ENSDARG00000079947 (directed) ENSDARG00000103020	0.0729108	exact
zgc:110434	2.40498	gfi1b	directed	ENSDARG00000079947 (directed) ENSDARG00000103015	false	directed	ENSDARG00000079947 (directed) ENSDARG00000103015	0.105343	exact
2015-09-01	2.37319	gfi1b	directed	ENSDARG00000079947 (directed) ENSDARG00000102889	false	directed	ENSDARG00000079947 (directed) ENSDARG00000102889	0.115075	exact
dut	3.20758	gfi1b	directed	ENSDARG00000079947 (directed) ENSDARG00000102748	false	directed	ENSDARG00000079947 (directed) ENSDARG00000102748	0.107461	exact
sb:cb449	17.6952	gfi1b	directed	ENSDARG00000079947 (directed) ENSDARG00000102540	false	directed	ENSDARG00000079947 (directed) ENSDARG00000102540	0.0774954	exact
si:ch211-71n6.4	2.30999	gfi1b	directed	ENSDARG00000079947 (directed) ENSDARG00000102234	false	directed	ENSDARG00000079947 (directed) ENSDARG00000102234	0.0763705	exact
ppox	2.47095	gfi1b	directed	ENSDARG00000079947 (directed) ENSDARG00000102167	false	directed	ENSDARG00000079947 (directed) ENSDARG00000102167	0.0805909	exact
ENSDARG00000102033	4.59444	gfi1b	directed	ENSDARG00000079947 (directed) ENSDARG00000102033	false	directed	ENSDARG00000079947 (directed) ENSDARG00000102033	0.0838334	exact
LOC103911748	2.98761	gfi1b	directed	ENSDARG00000079947 (directed) ENSDARG00000101876	false	directed	ENSDARG00000079947 (directed) ENSDARG00000101876	0.101446	exact
si:ch211-243p7.3	3.35708	gfi1b	directed	ENSDARG00000079947 (directed) ENSDARG00000101823	false	directed	ENSDARG00000079947 (directed) ENSDARG00000101823	0.106959	exact
ENSDARG00000101572	2.125	gfi1b	directed	ENSDARG00000079947 (directed) ENSDARG00000101572	false	directed	ENSDARG00000079947 (directed) ENSDARG00000101572	0.115507	exact
irx3a	2.35	gfi1b	directed	ENSDARG00000079947 (directed) ENSDARG00000101076	false	directed	ENSDARG00000079947 (directed) ENSDARG00000101076	0.125502	exact
prc1a	2.59286	gfi1b	directed	ENSDARG00000079947 (directed) ENSDARG00000100918	false	directed	ENSDARG00000079947 (directed) ENSDARG00000100918	0.130919	exact
cdc20	2.59134	gfi1b	directed	ENSDARG00000079947 (directed) ENSDARG00000100741	false	directed	ENSDARG00000079947 (directed) ENSDARG00000100741	0.116639	exact
egfl7	2.11111	gfi1b	directed	ENSDARG00000079947 (directed) ENSDARG00000100657	false	directed	ENSDARG00000079947 (directed) ENSDARG00000100657	0.117667	exact
ENSDARG00000100641	2.08333	gfi1b	directed	ENSDARG00000079947 (directed) ENSDARG00000100641	false	directed	ENSDARG00000079947 (directed) ENSDARG00000100641	0.0169473	exact
trrap	1.24714	gfi1b	directed	ENSDARG00000079947 (directed) ENSDARG00000100623	false	directed	ENSDARG00000079947 (directed) ENSDARG00000100623	0.146062	exact
ahsa1b	2.72917	gfi1b	directed	ENSDARG00000079947 (directed) ENSDARG00000100317	false	directed	ENSDARG00000079947 (directed) ENSDARG00000100317	0.0560373	exact
slc15a1a	4.28582	gfi1b	directed	ENSDARG00000079947 (directed) ENSDARG00000100315	false	directed	ENSDARG00000079947 (directed) ENSDARG00000100315	0.070026	exact
thumpd1	3.03535	gfi1b	directed	ENSDARG00000079947 (directed) ENSDARG00000100264	false	directed	ENSDARG00000079947 (directed) ENSDARG00000100264	0.0847601	exact
cyr61l2	2.20882	gfi1b	directed	ENSDARG00000079947 (directed) ENSDARG00000099985	false	directed	ENSDARG00000079947 (directed) ENSDARG00000099985	0.0936001	exact
tbce	2.37202	gfi1b	directed	ENSDARG00000079947 (directed) ENSDARG00000099921	false	directed	ENSDARG00000079947 (directed) ENSDARG00000099921	0.0745848	exact
arl4aa	2.40117	gfi1b	directed	ENSDARG00000079947 (directed) ENSDARG00000099918	false	directed	ENSDARG00000079947 (directed) ENSDARG00000099918	0.12028	exact
hnrnpabb	2.65609	gfi1b	directed	ENSDARG00000079947 (directed) ENSDARG00000099865	false	directed	ENSDARG00000079947 (directed) ENSDARG00000099865	0.115562	exact
foxred1	2.26085	gfi1b	directed	ENSDARG00000079947 (directed) ENSDARG00000099705	false	directed	ENSDARG00000079947 (directed) ENSDARG00000099705	0.0998859	exact
ENSDARG00000099619	10.1537	gfi1b	directed	ENSDARG00000079947 (directed) ENSDARG00000099619	false	directed	ENSDARG00000079947 (directed) ENSDARG00000099619	0.0947441	exact
zgc:66483	4.95	gfi1b	directed	ENSDARG00000079947 (directed) ENSDARG00000099612	false	directed	ENSDARG00000079947 (directed) ENSDARG00000099612	0.0817051	exact
cnn3a	2	gfi1b	directed	ENSDARG00000079947 (directed) ENSDARG00000099510	false	directed	ENSDARG00000079947 (directed) ENSDARG00000099510	0.0985472	exact
si:	2.0625	gfi1b	directed	ENSDARG00000079947 (directed) ENSDARG00000099385	false	directed	ENSDARG00000079947 (directed) ENSDARG00000099385	0.119925	exact
utp20	3.01178	gfi1b	directed	ENSDARG00000079947 (directed) ENSDARG00000099280	false	directed	ENSDARG00000079947 (directed) ENSDARG00000099280	0.0942638	exact
si:dkey-23a13.14	5.30287	gfi1b	directed	ENSDARG00000079947 (directed) ENSDARG00000099123	false	directed	ENSDARG00000079947 (directed) ENSDARG00000099123	0.127105	exact
sbno1	2.52202	gfi1b	directed	ENSDARG00000079947 (directed) ENSDARG00000099080	false	directed	ENSDARG00000079947 (directed) ENSDARG00000099080	0.0979372	exact
si:ch73-157i16.3	2.36337	gfi1b	directed	ENSDARG00000079947 (directed) ENSDARG00000098871	false	directed	ENSDARG00000079947 (directed) ENSDARG00000098871	0.106857	exact
tubb2b	2.56763	gfi1b	directed	ENSDARG00000079947 (directed) ENSDARG00000098591	false	directed	ENSDARG00000079947 (directed) ENSDARG00000098591	0.107835	exact
ENSDARG00000098503	1.26348	gfi1b	directed	ENSDARG00000079947 (directed) ENSDARG00000098503	false	directed	ENSDARG00000079947 (directed) ENSDARG00000098503	0.0988974	exact
LOC563292	2.6381	gfi1b	directed	ENSDARG00000079947 (directed) ENSDARG00000098424	false	directed	ENSDARG00000079947 (directed) ENSDARG00000098424	0.101943	exact
actr5	2.88254	gfi1b	directed	ENSDARG00000079947 (directed) ENSDARG00000098235	false	directed	ENSDARG00000079947 (directed) ENSDARG00000098235	0.0632303	exact
LOC101886482	4.20996	gfi1b	directed	ENSDARG00000079947 (directed) ENSDARG00000098233	false	directed	ENSDARG00000079947 (directed) ENSDARG00000098233	0.149433	exact
si:dkeyp-97a10.2	4.64167	gfi1b	directed	ENSDARG00000079947 (directed) ENSDARG00000098129	false	directed	ENSDARG00000079947 (directed) ENSDARG00000098129	0.0969326	exact
ugt1b1	2.72339	gfi1b	directed	ENSDARG00000079947 (directed) ENSDARG00000097491	false	directed	ENSDARG00000079947 (directed) ENSDARG00000097491	0.0697968	exact
si:dkey-108k21.25	2.61543	gfi1b	directed	ENSDARG00000079947 (directed) ENSDARG00000097258	false	directed	ENSDARG00000079947 (directed) ENSDARG00000097258	0.129359	exact
ENSDARG00000096855	2.74727	gfi1b	directed	ENSDARG00000079947 (directed) ENSDARG00000096855	false	directed	ENSDARG00000079947 (directed) ENSDARG00000096855	0.0958495	exact
blvrb	2.64482	gfi1b	directed	ENSDARG00000079947 (directed) ENSDARG00000096829	false	directed	ENSDARG00000079947 (directed) ENSDARG00000096829	0.101824	exact
dyrk2	2.27882	gfi1b	directed	ENSDARG00000079947 (directed) ENSDARG00000094646	false	directed	ENSDARG00000079947 (directed) ENSDARG00000094646	0.0941512	exact
si:ch1073-296i8.2	2.98016	gfi1b	directed	ENSDARG00000079947 (directed) ENSDARG00000093773	false	directed	ENSDARG00000079947 (directed) ENSDARG00000093773	0.102546	exact
si:ch73-209l12.1	6.17579	gfi1b	directed	ENSDARG00000079947 (directed) ENSDARG00000092776	false	directed	ENSDARG00000079947 (directed) ENSDARG00000092776	0.135403	exact
si:dkey-108k21.17	2.56968	gfi1b	directed	ENSDARG00000079947 (directed) ENSDARG00000092743	false	directed	ENSDARG00000079947 (directed) ENSDARG00000092743	0.137385	exact
thbd	2.11111	gfi1b	directed	ENSDARG00000079947 (directed) ENSDARG00000092470	false	directed	ENSDARG00000079947 (directed) ENSDARG00000092470	0.0831158	exact
zgc:153352	3.53611	gfi1b	directed	ENSDARG00000079947 (directed) ENSDARG00000092445	false	directed	ENSDARG00000079947 (directed) ENSDARG00000092445	0.0893572	exact
LOC100535981	2.4272	gfi1b	directed	ENSDARG00000079947 (directed) ENSDARG00000092199	false	directed	ENSDARG00000079947 (directed) ENSDARG00000092199	0.0560275	exact
si:ch211-156j16.1	2.49583	gfi1b	directed	ENSDARG00000079947 (directed) ENSDARG00000092035	false	directed	ENSDARG00000079947 (directed) ENSDARG00000092035	0.0557316	exact
si:dkey-239h2.3	2.225	gfi1b	directed	ENSDARG00000079947 (directed) ENSDARG00000092033	false	directed	ENSDARG00000079947 (directed) ENSDARG00000092033	0.0821849	exact
si:dkey-151m15.5	2.125	gfi1b	directed	ENSDARG00000079947 (directed) ENSDARG00000091962	false	directed	ENSDARG00000079947 (directed) ENSDARG00000091962	0.0601483	exact
znf106b	5.5119	gfi1b	directed	ENSDARG00000079947 (directed) ENSDARG00000091947	false	directed	ENSDARG00000079947 (directed) ENSDARG00000091947	0.0917032	exact
ENSDARG00000091896	6.06667	gfi1b	directed	ENSDARG00000079947 (directed) ENSDARG00000091896	false	directed	ENSDARG00000079947 (directed) ENSDARG00000091896	0.0382624	exact
ucp3	2.41111	gfi1b	directed	ENSDARG00000079947 (directed) ENSDARG00000091209	false	directed	ENSDARG00000079947 (directed) ENSDARG00000091209	0.0787759	exact
slc38a3b	3.0845	gfi1b	directed	ENSDARG00000079947 (directed) ENSDARG00000091061	false	directed	ENSDARG00000079947 (directed) ENSDARG00000091061	0.0834595	exact
parm1	2.94643	gfi1b	directed	ENSDARG00000079947 (directed) ENSDARG00000090996	false	directed	ENSDARG00000079947 (directed) ENSDARG00000090996	0.117473	exact
si:dkey-75b17.1	2.51069	gfi1b	directed	ENSDARG00000079947 (directed) ENSDARG00000090935	false	directed	ENSDARG00000079947 (directed) ENSDARG00000090935	0.073672	exact
zp3.1	3.91786	gfi1b	directed	ENSDARG00000079947 (directed) ENSDARG00000090768	false	directed	ENSDARG00000079947 (directed) ENSDARG00000090768	0.0405724	exact
plk2a	2.40873	gfi1b	directed	ENSDARG00000079947 (directed) ENSDARG00000090752	false	directed	ENSDARG00000079947 (directed) ENSDARG00000090752	0.0972964	exact
si:dkey-246i14.3	2.53307	gfi1b	directed	ENSDARG00000079947 (directed) ENSDARG00000090427	false	directed	ENSDARG00000079947 (directed) ENSDARG00000090427	0.0756682	exact
usp44	2.49756	gfi1b	directed	ENSDARG00000079947 (directed) ENSDARG00000089861	false	directed	ENSDARG00000079947 (directed) ENSDARG00000089861	0.0839946	exact
akap1a	4.20714	gfi1b	directed	ENSDARG00000079947 (directed) ENSDARG00000089802	false	directed	ENSDARG00000079947 (directed) ENSDARG00000089802	0.0346583	exact
si:dkey-108k21.11	3.81519	gfi1b	directed	ENSDARG00000079947 (directed) ENSDARG00000089719	false	directed	ENSDARG00000079947 (directed) ENSDARG00000089719	0.115473	exact
si:cabz01054394.7	2.75113	gfi1b	directed	ENSDARG00000079947 (directed) ENSDARG00000089715	false	directed	ENSDARG00000079947 (directed) ENSDARG00000089715	0.0549674	exact
bod1l1	2.2798	gfi1b	directed	ENSDARG00000079947 (directed) ENSDARG00000089505	false	directed	ENSDARG00000079947 (directed) ENSDARG00000089505	0.100181	exact
zgc:113119	2.40609	gfi1b	directed	ENSDARG00000079947 (directed) ENSDARG00000089142	false	directed	ENSDARG00000079947 (directed) ENSDARG00000089142	0.0975467	exact
cep131	2.48004	gfi1b	directed	ENSDARG00000079947 (directed) ENSDARG00000088984	false	directed	ENSDARG00000079947 (directed) ENSDARG00000088984	0.138989	exact
notum2	2.29835	gfi1b	directed	ENSDARG00000079947 (directed) ENSDARG00000088411	false	directed	ENSDARG00000079947 (directed) ENSDARG00000088411	0.0423101	exact
foxj1b	3.58552	gfi1b	directed	ENSDARG00000079947 (directed) ENSDARG00000088290	false	directed	ENSDARG00000079947 (directed) ENSDARG00000088290	0.0831986	exact
si:ch211-168f7.5	1.3342	gfi1b	directed	ENSDARG00000079947 (directed) ENSDARG00000088195	false	directed	ENSDARG00000079947 (directed) ENSDARG00000088195	0.126881	exact
zgc:85936	3.20556	gfi1b	directed	ENSDARG00000079947 (directed) ENSDARG00000087529	false	directed	ENSDARG00000079947 (directed) ENSDARG00000087529	0.108191	exact
si:dkey-226l10.6	4.24754	gfi1b	directed	ENSDARG00000079947 (directed) ENSDARG00000087483	false	directed	ENSDARG00000079947 (directed) ENSDARG00000087483	0.114557	exact
znf574	2.57465	gfi1b	directed	ENSDARG00000079947 (directed) ENSDARG00000087074	false	directed	ENSDARG00000079947 (directed) ENSDARG00000087074	0.109683	exact
atxn1l	2.39924	gfi1b	directed	ENSDARG00000079947 (directed) ENSDARG00000086977	false	directed	ENSDARG00000079947 (directed) ENSDARG00000086977	0.0844622	exact
si:dkeyp-67a8.2	3.05311	gfi1b	directed	ENSDARG00000079947 (directed) ENSDARG00000086815	false	directed	ENSDARG00000079947 (directed) ENSDARG00000086815	0.0577926	exact
ENSDARG00000086708	2.41438	gfi1b	directed	ENSDARG00000079947 (directed) ENSDARG00000086708	false	directed	ENSDARG00000079947 (directed) ENSDARG00000086708	0.118991	exact
si:ch211-113a14.11	2.72736	gfi1b	directed	ENSDARG00000079947 (directed) ENSDARG00000086591	false	directed	ENSDARG00000079947 (directed) ENSDARG00000086591	0.146817	exact
gpr156	2.25	gfi1b	directed	ENSDARG00000079947 (directed) ENSDARG00000086215	false	directed	ENSDARG00000079947 (directed) ENSDARG00000086215	0.0715593	exact
pot1	3.06859	gfi1b	directed	ENSDARG00000079947 (directed) ENSDARG00000079915	false	directed	ENSDARG00000079947 (directed) ENSDARG00000079915	0.0933292	exact
peak1	3.04646	gfi1b	directed	ENSDARG00000079947 (directed) ENSDARG00000079756	false	directed	ENSDARG00000079947 (directed) ENSDARG00000079756	0.0825181	exact
ENSDARG00000079688	1.47897	gfi1b	directed	ENSDARG00000079947 (directed) ENSDARG00000079688	false	directed	ENSDARG00000079947 (directed) ENSDARG00000079688	0.118557	exact
naa30	2.125	gfi1b	directed	ENSDARG00000079947 (directed) ENSDARG00000079686	false	directed	ENSDARG00000079947 (directed) ENSDARG00000079686	0.105248	exact
LOC100333265	3.03182	gfi1b	directed	ENSDARG00000079947 (directed) ENSDARG00000079472	false	directed	ENSDARG00000079947 (directed) ENSDARG00000079472	0.0720851	exact
si:dkey-57h18.1	12.2592	gfi1b	directed	ENSDARG00000079947 (directed) ENSDARG00000079457	false	directed	ENSDARG00000079947 (directed) ENSDARG00000079457	0.049393	exact
pkp3b	2.50043	gfi1b	directed	ENSDARG00000079947 (directed) ENSDARG00000079438	false	directed	ENSDARG00000079947 (directed) ENSDARG00000079438	0.0519219	exact
znf654	2.5538	gfi1b	directed	ENSDARG00000079947 (directed) ENSDARG00000079350	false	directed	ENSDARG00000079947 (directed) ENSDARG00000079350	0.12241	exact
rfwd2	2.19643	gfi1b	directed	ENSDARG00000079947 (directed) ENSDARG00000079329	false	directed	ENSDARG00000079947 (directed) ENSDARG00000079329	0.0658936	exact
kmt2ca	2	gfi1b	directed	ENSDARG00000079947 (directed) ENSDARG00000079312	false	directed	ENSDARG00000079947 (directed) ENSDARG00000079312	0.0895045	exact
si:dkeyp-2e4.2	3.27778	gfi1b	directed	ENSDARG00000079947 (directed) ENSDARG00000079263	false	directed	ENSDARG00000079947 (directed) ENSDARG00000079263	0.0948458	exact
gemin5	2.39692	gfi1b	directed	ENSDARG00000079947 (directed) ENSDARG00000079257	false	directed	ENSDARG00000079947 (directed) ENSDARG00000079257	0.050643	exact
trim59	2.50952	gfi1b	directed	ENSDARG00000079947 (directed) ENSDARG00000079238	false	directed	ENSDARG00000079947 (directed) ENSDARG00000079238	0.0736066	exact
si:dkey-85a20.4	2.80999	gfi1b	directed	ENSDARG00000079947 (directed) ENSDARG00000079055	false	directed	ENSDARG00000079947 (directed) ENSDARG00000079055	0.0758213	exact
brd4	2.1381	gfi1b	directed	ENSDARG00000079947 (directed) ENSDARG00000078904	false	directed	ENSDARG00000079947 (directed) ENSDARG00000078904	0.0935046	exact
gigyf1	3.04915	gfi1b	directed	ENSDARG00000079947 (directed) ENSDARG00000078691	false	directed	ENSDARG00000079947 (directed) ENSDARG00000078691	0.103875	exact
supt20	2.70604	gfi1b	directed	ENSDARG00000079947 (directed) ENSDARG00000078658	false	directed	ENSDARG00000079947 (directed) ENSDARG00000078658	0.0971413	exact
tpx2	2.76783	gfi1b	directed	ENSDARG00000079947 (directed) ENSDARG00000078654	false	directed	ENSDARG00000079947 (directed) ENSDARG00000078654	0.149714	exact
arhgef9b	2.19643	gfi1b	directed	ENSDARG00000079947 (directed) ENSDARG00000078624	false	directed	ENSDARG00000079947 (directed) ENSDARG00000078624	0.110738	exact
zgc:195081	3.58291	gfi1b	directed	ENSDARG00000079947 (directed) ENSDARG00000078481	false	directed	ENSDARG00000079947 (directed) ENSDARG00000078481	0.0896213	exact
oat	2.27778	gfi1b	directed	ENSDARG00000079947 (directed) ENSDARG00000078425	false	directed	ENSDARG00000079947 (directed) ENSDARG00000078425	0.0612142	exact
zc3h4	3.0127	gfi1b	directed	ENSDARG00000079947 (directed) ENSDARG00000078355	false	directed	ENSDARG00000079947 (directed) ENSDARG00000078355	0.100204	exact
limd2	2.6625	gfi1b	directed	ENSDARG00000079947 (directed) ENSDARG00000078092	false	directed	ENSDARG00000079947 (directed) ENSDARG00000078092	0.116359	exact
armc5	2.4084	gfi1b	directed	ENSDARG00000079947 (directed) ENSDARG00000078083	false	directed	ENSDARG00000079947 (directed) ENSDARG00000078083	0.079578	exact
usp54a	2.654	gfi1b	directed	ENSDARG00000079947 (directed) ENSDARG00000077948	false	directed	ENSDARG00000079947 (directed) ENSDARG00000077948	0.126132	exact
ints5	2.5961	gfi1b	directed	ENSDARG00000079947 (directed) ENSDARG00000077943	false	directed	ENSDARG00000079947 (directed) ENSDARG00000077943	0.102757	exact
hgsnat	2.47345	gfi1b	directed	ENSDARG00000079947 (directed) ENSDARG00000077804	false	directed	ENSDARG00000079947 (directed) ENSDARG00000077804	0.0931899	exact
rin3	1.42222	gfi1b	directed	ENSDARG00000079947 (directed) ENSDARG00000077618	false	directed	ENSDARG00000079947 (directed) ENSDARG00000077618	0.0409156	exact
tmem201	2	gfi1b	directed	ENSDARG00000079947 (directed) ENSDARG00000077307	false	directed	ENSDARG00000079947 (directed) ENSDARG00000077307	0.0873973	exact
si:ch211-160o17.4	2.64286	gfi1b	directed	ENSDARG00000079947 (directed) ENSDARG00000077095	false	directed	ENSDARG00000079947 (directed) ENSDARG00000077095	0.0873841	exact
ankrd34ba	2.7381	gfi1b	directed	ENSDARG00000079947 (directed) ENSDARG00000077086	false	directed	ENSDARG00000079947 (directed) ENSDARG00000077086	0.0862567	exact
esco1	3.09924	gfi1b	directed	ENSDARG00000079947 (directed) ENSDARG00000077057	false	directed	ENSDARG00000079947 (directed) ENSDARG00000077057	0.0864334	exact
igdcc4	2.82369	gfi1b	directed	ENSDARG00000079947 (directed) ENSDARG00000076919	false	directed	ENSDARG00000079947 (directed) ENSDARG00000076919	0.11304	exact
zgc:171967	2.16111	gfi1b	directed	ENSDARG00000079947 (directed) ENSDARG00000076888	false	directed	ENSDARG00000079947 (directed) ENSDARG00000076888	0.0921412	exact
arap3	2.13095	gfi1b	directed	ENSDARG00000079947 (directed) ENSDARG00000076801	false	directed	ENSDARG00000079947 (directed) ENSDARG00000076801	0.0830053	exact
cdca7b	5.34841	gfi1b	directed	ENSDARG00000079947 (directed) ENSDARG00000076659	false	directed	ENSDARG00000079947 (directed) ENSDARG00000076659	0.0710151	exact
plagl2	3.41502	gfi1b	directed	ENSDARG00000079947 (directed) ENSDARG00000076657	false	directed	ENSDARG00000079947 (directed) ENSDARG00000076657	0.115939	exact
ptprb	2.125	gfi1b	directed	ENSDARG00000079947 (directed) ENSDARG00000076624	false	directed	ENSDARG00000079947 (directed) ENSDARG00000076624	0.0961753	exact
abhd8b	2.96032	gfi1b	directed	ENSDARG00000079947 (directed) ENSDARG00000076620	false	directed	ENSDARG00000079947 (directed) ENSDARG00000076620	0.0459557	exact
pcdh12	2.85189	gfi1b	directed	ENSDARG00000079947 (directed) ENSDARG00000076594	false	directed	ENSDARG00000079947 (directed) ENSDARG00000076594	0.107222	exact
dlk2	2.13889	gfi1b	directed	ENSDARG00000079947 (directed) ENSDARG00000076247	false	directed	ENSDARG00000079947 (directed) ENSDARG00000076247	0.0421893	exact
kif2c	3.08013	gfi1b	directed	ENSDARG00000079947 (directed) ENSDARG00000076228	false	directed	ENSDARG00000079947 (directed) ENSDARG00000076228	0.0937851	exact
si:ch73-36p18.3	2.24498	gfi1b	directed	ENSDARG00000079947 (directed) ENSDARG00000076129	false	directed	ENSDARG00000079947 (directed) ENSDARG00000076129	0.13488	exact
zfyve16	6.60913	gfi1b	directed	ENSDARG00000079947 (directed) ENSDARG00000075747	false	directed	ENSDARG00000079947 (directed) ENSDARG00000075747	0.0752473	exact
si:ch1073-429i10.1	9.66201	gfi1b	directed	ENSDARG00000079947 (directed) ENSDARG00000075664	false	directed	ENSDARG00000079947 (directed) ENSDARG00000075664	0.141784	exact
zgc:173587	2.73631	gfi1b	directed	ENSDARG00000079947 (directed) ENSDARG00000075482	false	directed	ENSDARG00000079947 (directed) ENSDARG00000075482	0.120341	exact
znf989	4.80238	gfi1b	directed	ENSDARG00000079947 (directed) ENSDARG00000075470	false	directed	ENSDARG00000079947 (directed) ENSDARG00000075470	0.073539	exact
dguok	2.11513	gfi1b	directed	ENSDARG00000079947 (directed) ENSDARG00000075395	false	directed	ENSDARG00000079947 (directed) ENSDARG00000075395	0.0480947	exact
rpap1	2.5881	gfi1b	directed	ENSDARG00000079947 (directed) ENSDARG00000075072	false	directed	ENSDARG00000079947 (directed) ENSDARG00000075072	0.074812	exact
rasip1	2.20536	gfi1b	directed	ENSDARG00000079947 (directed) ENSDARG00000074829	false	directed	ENSDARG00000079947 (directed) ENSDARG00000074829	0.106711	exact
frem3	2.41621	gfi1b	directed	ENSDARG00000079947 (directed) ENSDARG00000074677	false	directed	ENSDARG00000079947 (directed) ENSDARG00000074677	0.0927638	exact
si:ch211-198a12.6	2.20952	gfi1b	directed	ENSDARG00000079947 (directed) ENSDARG00000074624	false	directed	ENSDARG00000079947 (directed) ENSDARG00000074624	0.113304	exact
lzts2a	2.19841	gfi1b	directed	ENSDARG00000079947 (directed) ENSDARG00000074597	false	directed	ENSDARG00000079947 (directed) ENSDARG00000074597	0.131412	exact
si:ch211-214e3.5	2.63393	gfi1b	directed	ENSDARG00000079947 (directed) ENSDARG00000074270	false	directed	ENSDARG00000079947 (directed) ENSDARG00000074270	0.0810295	exact
flna	3.1671	gfi1b	directed	ENSDARG00000079947 (directed) ENSDARG00000074201	false	directed	ENSDARG00000079947 (directed) ENSDARG00000074201	0.0951441	exact
birc6	2.57619	gfi1b	directed	ENSDARG00000079947 (directed) ENSDARG00000074166	false	directed	ENSDARG00000079947 (directed) ENSDARG00000074166	0.070717	exact
c2cd3	3.14359	gfi1b	directed	ENSDARG00000079947 (directed) ENSDARG00000074137	false	directed	ENSDARG00000079947 (directed) ENSDARG00000074137	0.0988009	exact
rbms1a	2.19643	gfi1b	directed	ENSDARG00000079947 (directed) ENSDARG00000074023	false	directed	ENSDARG00000079947 (directed) ENSDARG00000074023	0.0659305	exact
si:ch1073-159d7.7	13.5849	gfi1b	directed	ENSDARG00000079947 (directed) ENSDARG00000074012	false	directed	ENSDARG00000079947 (directed) ENSDARG00000074012	0.111561	exact
usp7	2.125	gfi1b	directed	ENSDARG00000079947 (directed) ENSDARG00000073710	false	directed	ENSDARG00000079947 (directed) ENSDARG00000073710	0.123197	exact
sec24b	2.375	gfi1b	directed	ENSDARG00000079947 (directed) ENSDARG00000071906	false	directed	ENSDARG00000079947 (directed) ENSDARG00000071906	0.0475506	exact
slc25a18	2.67063	gfi1b	directed	ENSDARG00000079947 (directed) ENSDARG00000070717	false	directed	ENSDARG00000079947 (directed) ENSDARG00000070717	0.0986771	exact
zgc:64022	2.61122	gfi1b	directed	ENSDARG00000079947 (directed) ENSDARG00000070705	false	directed	ENSDARG00000079947 (directed) ENSDARG00000070705	0.0651404	exact
si:ch211-69g19.2	3.83622	gfi1b	directed	ENSDARG00000079947 (directed) ENSDARG00000070656	false	directed	ENSDARG00000079947 (directed) ENSDARG00000070656	0.120363	exact
top1l	2.18056	gfi1b	directed	ENSDARG00000079947 (directed) ENSDARG00000070545	false	directed	ENSDARG00000079947 (directed) ENSDARG00000070545	0.0953114	exact
si:dkey-13n23.3	12.055	gfi1b	directed	ENSDARG00000079947 (directed) ENSDARG00000070465	false	directed	ENSDARG00000079947 (directed) ENSDARG00000070465	0.0767987	exact
fip1l1b	2.63456	gfi1b	directed	ENSDARG00000079947 (directed) ENSDARG00000070431	false	directed	ENSDARG00000079947 (directed) ENSDARG00000070431	0.0861919	exact
hoxc11a	5.2746	gfi1b	directed	ENSDARG00000079947 (directed) ENSDARG00000070351	false	directed	ENSDARG00000079947 (directed) ENSDARG00000070351	0.0799693	exact
si:ch211-113a14.19	4.59683	gfi1b	directed	ENSDARG00000079947 (directed) ENSDARG00000070286	false	directed	ENSDARG00000079947 (directed) ENSDARG00000070286	0.0820927	exact
zgc:110434	3.25668	gfi1b	directed	ENSDARG00000079947 (directed) ENSDARG00000070280	false	directed	ENSDARG00000079947 (directed) ENSDARG00000070280	0.0962482	exact
aldh1l2	2.11111	gfi1b	directed	ENSDARG00000079947 (directed) ENSDARG00000070230	false	directed	ENSDARG00000079947 (directed) ENSDARG00000070230	0.117339	exact
rpp25l	2.625	gfi1b	directed	ENSDARG00000079947 (directed) ENSDARG00000070131	false	directed	ENSDARG00000079947 (directed) ENSDARG00000070131	0.081964	exact
dchs1a	3.26234	gfi1b	directed	ENSDARG00000079947 (directed) ENSDARG00000070025	false	directed	ENSDARG00000079947 (directed) ENSDARG00000070025	0.115672	exact
si:ch211-145b13.6	2.93452	gfi1b	directed	ENSDARG00000079947 (directed) ENSDARG00000069998	false	directed	ENSDARG00000079947 (directed) ENSDARG00000069998	0.103029	exact
sphk2	3.1529	gfi1b	directed	ENSDARG00000079947 (directed) ENSDARG00000069893	false	directed	ENSDARG00000079947 (directed) ENSDARG00000069893	0.0972772	exact
pcgf6	3.04293	gfi1b	directed	ENSDARG00000079947 (directed) ENSDARG00000069681	false	directed	ENSDARG00000079947 (directed) ENSDARG00000069681	0.0989746	exact
emp1	2.0625	gfi1b	directed	ENSDARG00000079947 (directed) ENSDARG00000069632	false	directed	ENSDARG00000079947 (directed) ENSDARG00000069632	0.0467306	exact
mex3c	2.73724	gfi1b	directed	ENSDARG00000079947 (directed) ENSDARG00000068971	false	directed	ENSDARG00000079947 (directed) ENSDARG00000068971	0.0619322	exact
mettl5	6.27202	gfi1b	directed	ENSDARG00000079947 (directed) ENSDARG00000068893	false	directed	ENSDARG00000079947 (directed) ENSDARG00000068893	0.0411699	exact
gucd1	2.22008	gfi1b	directed	ENSDARG00000079947 (directed) ENSDARG00000068438	false	directed	ENSDARG00000079947 (directed) ENSDARG00000068438	0.0792281	exact
h3f3b.1	3.19924	gfi1b	directed	ENSDARG00000079947 (directed) ENSDARG00000068434	false	directed	ENSDARG00000079947 (directed) ENSDARG00000068434	0.114232	exact
LOC100149117	2.77143	gfi1b	directed	ENSDARG00000079947 (directed) ENSDARG00000068417	false	directed	ENSDARG00000079947 (directed) ENSDARG00000068417	0.130719	exact
arid3c	2.61111	gfi1b	directed	ENSDARG00000079947 (directed) ENSDARG00000067729	false	directed	ENSDARG00000079947 (directed) ENSDARG00000067729	0.105263	exact
adam19b	3.41948	gfi1b	directed	ENSDARG00000079947 (directed) ENSDARG00000067545	false	directed	ENSDARG00000079947 (directed) ENSDARG00000067545	0.11203	exact
cdk12	2	gfi1b	directed	ENSDARG00000079947 (directed) ENSDARG00000063726	true	directed	ENSDARG00000079947 (directed) ENSDARG00000063726	0.154648	exact
antxr1c	2.07143	gfi1b	directed	ENSDARG00000079947 (directed) ENSDARG00000063612	false	directed	ENSDARG00000079947 (directed) ENSDARG00000063612	0.102143	exact
adpgk	2.779	gfi1b	directed	ENSDARG00000079947 (directed) ENSDARG00000063525	false	directed	ENSDARG00000079947 (directed) ENSDARG00000063525	0.0559049	exact
isy1	2.08333	gfi1b	directed	ENSDARG00000079947 (directed) ENSDARG00000063466	false	directed	ENSDARG00000079947 (directed) ENSDARG00000063466	0.0774483	exact
sgk2a	2.19286	gfi1b	directed	ENSDARG00000079947 (directed) ENSDARG00000063370	false	directed	ENSDARG00000079947 (directed) ENSDARG00000063370	0.091512	exact
abcb6a	9.44667	gfi1b	directed	ENSDARG00000079947 (directed) ENSDARG00000063297	false	directed	ENSDARG00000079947 (directed) ENSDARG00000063297	0.106272	exact
bmp7b	2.29167	gfi1b	directed	ENSDARG00000079947 (directed) ENSDARG00000063230	false	directed	ENSDARG00000079947 (directed) ENSDARG00000063230	0.0333438	exact
ppwd1	2.90952	gfi1b	directed	ENSDARG00000079947 (directed) ENSDARG00000063161	false	directed	ENSDARG00000079947 (directed) ENSDARG00000063161	0.0382346	exact
erfl3	4.33849	gfi1b	directed	ENSDARG00000079947 (directed) ENSDARG00000062801	false	directed	ENSDARG00000079947 (directed) ENSDARG00000062801	0.110441	exact
adpgk2	2.57692	gfi1b	directed	ENSDARG00000079947 (directed) ENSDARG00000062785	false	directed	ENSDARG00000079947 (directed) ENSDARG00000062785	0.0964619	exact
bcl2l13	2.65113	gfi1b	directed	ENSDARG00000079947 (directed) ENSDARG00000062370	false	directed	ENSDARG00000079947 (directed) ENSDARG00000062370	0.0630011	exact
kif14	3.01515	gfi1b	directed	ENSDARG00000079947 (directed) ENSDARG00000062187	false	directed	ENSDARG00000079947 (directed) ENSDARG00000062187	0.146185	exact
gse1	2.1875	gfi1b	directed	ENSDARG00000079947 (directed) ENSDARG00000062020	false	directed	ENSDARG00000079947 (directed) ENSDARG00000062020	0.114546	exact
acacb	2.63645	gfi1b	directed	ENSDARG00000079947 (directed) ENSDARG00000061994	false	directed	ENSDARG00000079947 (directed) ENSDARG00000061994	0.0742874	exact
vrtn	2.51481	gfi1b	directed	ENSDARG00000079947 (directed) ENSDARG00000061963	false	directed	ENSDARG00000079947 (directed) ENSDARG00000061963	0.0834782	exact
kdm6a	2.18254	gfi1b	directed	ENSDARG00000079947 (directed) ENSDARG00000061759	false	directed	ENSDARG00000079947 (directed) ENSDARG00000061759	0.125082	exact
ctdspl2a	2.36944	gfi1b	directed	ENSDARG00000079947 (directed) ENSDARG00000061587	false	directed	ENSDARG00000079947 (directed) ENSDARG00000061587	0.100828	exact
u2surp	3.66032	gfi1b	directed	ENSDARG00000079947 (directed) ENSDARG00000061490	false	directed	ENSDARG00000079947 (directed) ENSDARG00000061490	0.0916318	exact
gltscr1	2.74286	gfi1b	directed	ENSDARG00000079947 (directed) ENSDARG00000061159	false	directed	ENSDARG00000079947 (directed) ENSDARG00000061159	0.0990044	exact
gfod2	2.4375	gfi1b	directed	ENSDARG00000079947 (directed) ENSDARG00000061145	false	directed	ENSDARG00000079947 (directed) ENSDARG00000061145	0.0514574	exact
nipblb	2	gfi1b	directed	ENSDARG00000079947 (directed) ENSDARG00000061052	false	directed	ENSDARG00000079947 (directed) ENSDARG00000061052	0.105986	exact
spns2	3.75789	gfi1b	directed	ENSDARG00000079947 (directed) ENSDARG00000061017	false	directed	ENSDARG00000079947 (directed) ENSDARG00000061017	0.103154	exact
rpusd2	2	gfi1b	directed	ENSDARG00000079947 (directed) ENSDARG00000060992	false	directed	ENSDARG00000079947 (directed) ENSDARG00000060992	0.0325629	exact
polg	2.50947	gfi1b	directed	ENSDARG00000079947 (directed) ENSDARG00000060951	false	directed	ENSDARG00000079947 (directed) ENSDARG00000060951	0.0921478	exact
ctdspl2b	2.59259	gfi1b	directed	ENSDARG00000079947 (directed) ENSDARG00000060586	false	directed	ENSDARG00000079947 (directed) ENSDARG00000060586	0.100453	exact
atad2b	2	gfi1b	directed	ENSDARG00000079947 (directed) ENSDARG00000060537	false	directed	ENSDARG00000079947 (directed) ENSDARG00000060537	0.105315	exact
nin	2.11111	gfi1b	directed	ENSDARG00000079947 (directed) ENSDARG00000060298	false	directed	ENSDARG00000079947 (directed) ENSDARG00000060298	0.131131	exact
btaf1	2.18382	gfi1b	directed	ENSDARG00000079947 (directed) ENSDARG00000060089	false	directed	ENSDARG00000079947 (directed) ENSDARG00000060089	0.0801618	exact
fam222ba	2.51452	gfi1b	directed	ENSDARG00000079947 (directed) ENSDARG00000059886	false	directed	ENSDARG00000079947 (directed) ENSDARG00000059886	0.126947	exact
sin3ab	2.83245	gfi1b	directed	ENSDARG00000079947 (directed) ENSDARG00000059812	false	directed	ENSDARG00000079947 (directed) ENSDARG00000059812	0.135256	exact
sympk	4.55119	gfi1b	directed	ENSDARG00000079947 (directed) ENSDARG00000059553	false	directed	ENSDARG00000079947 (directed) ENSDARG00000059553	0.100606	exact
dnajc8	2.91018	gfi1b	directed	ENSDARG00000079947 (directed) ENSDARG00000059373	false	directed	ENSDARG00000079947 (directed) ENSDARG00000059373	0.0616965	exact
hnrnpl2	3.19478	gfi1b	directed	ENSDARG00000079947 (directed) ENSDARG00000059303	false	directed	ENSDARG00000079947 (directed) ENSDARG00000059303	0.101646	exact
si:ch211-237c6.4	3.16439	gfi1b	directed	ENSDARG00000079947 (directed) ENSDARG00000058903	false	directed	ENSDARG00000079947 (directed) ENSDARG00000058903	0.0714438	exact
sox18	2.64286	gfi1b	directed	ENSDARG00000079947 (directed) ENSDARG00000058598	false	directed	ENSDARG00000079947 (directed) ENSDARG00000058598	0.109381	exact
lama5	4.96884	gfi1b	directed	ENSDARG00000079947 (directed) ENSDARG00000058543	false	directed	ENSDARG00000079947 (directed) ENSDARG00000058543	0.0536606	exact
pole	2.5961	gfi1b	directed	ENSDARG00000079947 (directed) ENSDARG00000058533	false	directed	ENSDARG00000079947 (directed) ENSDARG00000058533	0.0778616	exact
hcfc2	2.67421	gfi1b	directed	ENSDARG00000079947 (directed) ENSDARG00000058127	false	directed	ENSDARG00000079947 (directed) ENSDARG00000058127	0.10228	exact
smyd3	5.0369	gfi1b	directed	ENSDARG00000079947 (directed) ENSDARG00000058050	false	directed	ENSDARG00000079947 (directed) ENSDARG00000058050	0.0512788	exact
hells	2.33175	gfi1b	directed	ENSDARG00000079947 (directed) ENSDARG00000057738	false	directed	ENSDARG00000079947 (directed) ENSDARG00000057738	0.110267	exact
prrc2c	1.19444	gfi1b	directed	ENSDARG00000079947 (directed) ENSDARG00000057583	false	directed	ENSDARG00000079947 (directed) ENSDARG00000057583	0.0924377	exact
polr3c	3.10034	gfi1b	directed	ENSDARG00000079947 (directed) ENSDARG00000057562	false	directed	ENSDARG00000079947 (directed) ENSDARG00000057562	0.0748478	exact
e2f8	459.892	gfi1b	directed	ENSDARG00000079947 (directed) ENSDARG00000057323	false	directed	ENSDARG00000079947 (directed) ENSDARG00000057323	0.0958585	exact
tut1	4.63678	gfi1b	directed	ENSDARG00000079947 (directed) ENSDARG00000057321	false	directed	ENSDARG00000079947 (directed) ENSDARG00000057321	0.0782405	exact
pdik1l	2.375	gfi1b	directed	ENSDARG00000079947 (directed) ENSDARG00000056509	false	directed	ENSDARG00000079947 (directed) ENSDARG00000056509	0.11396	exact
nipa2	2	gfi1b	directed	ENSDARG00000079947 (directed) ENSDARG00000055912	false	directed	ENSDARG00000079947 (directed) ENSDARG00000055912	0.0427753	exact
ptger3	2.77244	gfi1b	directed	ENSDARG00000079947 (directed) ENSDARG00000055781	false	directed	ENSDARG00000079947 (directed) ENSDARG00000055781	0.111099	exact
foxn2a	2.44167	gfi1b	directed	ENSDARG00000079947 (directed) ENSDARG00000055574	false	directed	ENSDARG00000079947 (directed) ENSDARG00000055574	0.0921555	exact
zcchc7	2.43813	gfi1b	directed	ENSDARG00000079947 (directed) ENSDARG00000055443	false	directed	ENSDARG00000079947 (directed) ENSDARG00000055443	0.0912135	exact
sema3fb	3.48771	gfi1b	directed	ENSDARG00000079947 (directed) ENSDARG00000055373	false	directed	ENSDARG00000079947 (directed) ENSDARG00000055373	0.0823318	exact
fancc	2.40952	gfi1b	directed	ENSDARG00000079947 (directed) ENSDARG00000055232	false	directed	ENSDARG00000079947 (directed) ENSDARG00000055232	0.0785211	exact
nxf1	2.14835	gfi1b	directed	ENSDARG00000079947 (directed) ENSDARG00000055076	false	directed	ENSDARG00000079947 (directed) ENSDARG00000055076	0.134382	exact
zgc:110540	2.45589	gfi1b	directed	ENSDARG00000079947 (directed) ENSDARG00000054929	false	directed	ENSDARG00000079947 (directed) ENSDARG00000054929	0.115627	exact
pogza	2.09091	gfi1b	directed	ENSDARG00000079947 (directed) ENSDARG00000054778	false	directed	ENSDARG00000079947 (directed) ENSDARG00000054778	0.110768	exact
uggt1	3.12617	gfi1b	directed	ENSDARG00000079947 (directed) ENSDARG00000054746	false	directed	ENSDARG00000079947 (directed) ENSDARG00000054746	0.0737434	exact
smg1	2.43516	gfi1b	directed	ENSDARG00000079947 (directed) ENSDARG00000054570	false	directed	ENSDARG00000079947 (directed) ENSDARG00000054570	0.112116	exact
acin1a	2.20833	gfi1b	directed	ENSDARG00000079947 (directed) ENSDARG00000054290	false	directed	ENSDARG00000079947 (directed) ENSDARG00000054290	0.0968091	exact
ripply1	2	gfi1b	directed	ENSDARG00000079947 (directed) ENSDARG00000054103	false	directed	ENSDARG00000079947 (directed) ENSDARG00000054103	0.0714658	exact
angpt2b	2.67361	gfi1b	directed	ENSDARG00000079947 (directed) ENSDARG00000053906	false	directed	ENSDARG00000079947 (directed) ENSDARG00000053906	0.0817187	exact
gtpbp1	2	gfi1b	directed	ENSDARG00000079947 (directed) ENSDARG00000053467	false	directed	ENSDARG00000079947 (directed) ENSDARG00000053467	0.127684	exact
khdrbs1a	2.11111	gfi1b	directed	ENSDARG00000079947 (directed) ENSDARG00000052856	false	directed	ENSDARG00000079947 (directed) ENSDARG00000052856	0.0983539	exact
tia1	2	gfi1b	directed	ENSDARG00000079947 (directed) ENSDARG00000052536	false	directed	ENSDARG00000079947 (directed) ENSDARG00000052536	0.083107	exact
notch1b	3.24759	gfi1b	directed	ENSDARG00000079947 (directed) ENSDARG00000052094	false	directed	ENSDARG00000079947 (directed) ENSDARG00000052094	0.129102	exact
cabp2a	2.33333	gfi1b	directed	ENSDARG00000079947 (directed) ENSDARG00000052016	false	directed	ENSDARG00000079947 (directed) ENSDARG00000052016	0.0671341	exact
ccnb1	4.46893	gfi1b	directed	ENSDARG00000079947 (directed) ENSDARG00000051923	false	directed	ENSDARG00000079947 (directed) ENSDARG00000051923	0.11022	exact
zgc:114037	5.50556	gfi1b	directed	ENSDARG00000079947 (directed) ENSDARG00000051736	false	directed	ENSDARG00000079947 (directed) ENSDARG00000051736	0.103116	exact
zgc:110434	2.93571	gfi1b	directed	ENSDARG00000079947 (directed) ENSDARG00000051732	false	directed	ENSDARG00000079947 (directed) ENSDARG00000051732	0.0829441	exact
si:dkey-108k21.27	3.25548	gfi1b	directed	ENSDARG00000079947 (directed) ENSDARG00000051726	false	directed	ENSDARG00000079947 (directed) ENSDARG00000051726	0.112052	exact
rasl11a	2.73612	gfi1b	directed	ENSDARG00000079947 (directed) ENSDARG00000046013	false	directed	ENSDARG00000079947 (directed) ENSDARG00000046013	0.0664908	exact
rad51ap1	3.1421	gfi1b	directed	ENSDARG00000079947 (directed) ENSDARG00000045853	false	directed	ENSDARG00000079947 (directed) ENSDARG00000045853	0.0843352	exact
bmp10l	3.27335	gfi1b	directed	ENSDARG00000079947 (directed) ENSDARG00000045632	false	directed	ENSDARG00000079947 (directed) ENSDARG00000045632	0.0639497	exact
ENSDARG00000045605	2.65394	gfi1b	directed	ENSDARG00000079947 (directed) ENSDARG00000045605	false	directed	ENSDARG00000079947 (directed) ENSDARG00000045605	0.0957028	exact
pde7a	3.81948	gfi1b	directed	ENSDARG00000079947 (directed) ENSDARG00000045305	false	directed	ENSDARG00000079947 (directed) ENSDARG00000045305	0.120093	exact
si:dkey-222b8.1	496.749	gfi1b	directed	ENSDARG00000079947 (directed) ENSDARG00000045094	false	directed	ENSDARG00000079947 (directed) ENSDARG00000045094	0.110491	exact
dhrs3b	2.20192	gfi1b	directed	ENSDARG00000079947 (directed) ENSDARG00000044803	false	directed	ENSDARG00000079947 (directed) ENSDARG00000044803	0.0646802	exact
pcf11	2.65833	gfi1b	directed	ENSDARG00000079947 (directed) ENSDARG00000044625	false	directed	ENSDARG00000079947 (directed) ENSDARG00000044625	0.0880699	exact
polq	4.73154	gfi1b	directed	ENSDARG00000079947 (directed) ENSDARG00000044622	false	directed	ENSDARG00000079947 (directed) ENSDARG00000044622	0.113322	exact
tex261	2.475	gfi1b	directed	ENSDARG00000079947 (directed) ENSDARG00000044584	false	directed	ENSDARG00000079947 (directed) ENSDARG00000044584	0.0668755	exact
sall4	3.68849	gfi1b	directed	ENSDARG00000079947 (directed) ENSDARG00000044485	false	directed	ENSDARG00000079947 (directed) ENSDARG00000044485	0.116241	exact
gxylt2	5.05238	gfi1b	directed	ENSDARG00000079947 (directed) ENSDARG00000044191	false	directed	ENSDARG00000079947 (directed) ENSDARG00000044191	0.118915	exact
cyp2x7	3.18095	gfi1b	directed	ENSDARG00000079947 (directed) ENSDARG00000044002	false	directed	ENSDARG00000079947 (directed) ENSDARG00000044002	0.0776069	exact
setd6	3.05238	gfi1b	directed	ENSDARG00000079947 (directed) ENSDARG00000043986	false	directed	ENSDARG00000079947 (directed) ENSDARG00000043986	0.061338	exact
arid4a	3.27392	gfi1b	directed	ENSDARG00000079947 (directed) ENSDARG00000043873	false	directed	ENSDARG00000079947 (directed) ENSDARG00000043873	0.143461	exact
asf1bb	2.4036	gfi1b	directed	ENSDARG00000079947 (directed) ENSDARG00000043713	false	directed	ENSDARG00000079947 (directed) ENSDARG00000043713	0.103501	exact
si:dkey-86e18.1	2.17778	gfi1b	directed	ENSDARG00000079947 (directed) ENSDARG00000043536	false	directed	ENSDARG00000079947 (directed) ENSDARG00000043536	0.0637989	exact
fip1l1a	3.33853	gfi1b	directed	ENSDARG00000079947 (directed) ENSDARG00000043328	false	directed	ENSDARG00000079947 (directed) ENSDARG00000043328	0.067136	exact
gtf3c3	5.58095	gfi1b	directed	ENSDARG00000079947 (directed) ENSDARG00000043247	false	directed	ENSDARG00000079947 (directed) ENSDARG00000043247	0.0768138	exact
LOC100005536	5.50801	gfi1b	directed	ENSDARG00000079947 (directed) ENSDARG00000042887	false	directed	ENSDARG00000079947 (directed) ENSDARG00000042887	0.0703475	exact
nup205	2.34815	gfi1b	directed	ENSDARG00000079947 (directed) ENSDARG00000042530	false	directed	ENSDARG00000079947 (directed) ENSDARG00000042530	0.11733	exact
unga	2.51667	gfi1b	directed	ENSDARG00000079947 (directed) ENSDARG00000042527	false	directed	ENSDARG00000079947 (directed) ENSDARG00000042527	0.102265	exact
ENSDARG00000042492	2.27976	gfi1b	directed	ENSDARG00000079947 (directed) ENSDARG00000042492	false	directed	ENSDARG00000079947 (directed) ENSDARG00000042492	0.111829	exact
prkrira	3.88373	gfi1b	directed	ENSDARG00000079947 (directed) ENSDARG00000042489	false	directed	ENSDARG00000079947 (directed) ENSDARG00000042489	0.133838	exact
smek1	2.125	gfi1b	directed	ENSDARG00000079947 (directed) ENSDARG00000042187	true	directed	ENSDARG00000079947 (directed) ENSDARG00000042187	0.175754	exact
elmo3	2.24921	gfi1b	directed	ENSDARG00000079947 (directed) ENSDARG00000042126	false	directed	ENSDARG00000079947 (directed) ENSDARG00000042126	0.0128261	exact
trim35-40	2.59964	gfi1b	directed	ENSDARG00000079947 (directed) ENSDARG00000042116	false	directed	ENSDARG00000079947 (directed) ENSDARG00000042116	0.0395759	exact
kpna5	3.00754	gfi1b	directed	ENSDARG00000079947 (directed) ENSDARG00000042030	false	directed	ENSDARG00000079947 (directed) ENSDARG00000042030	0.0553495	exact
yrdc	3.38452	gfi1b	directed	ENSDARG00000079947 (directed) ENSDARG00000041428	false	directed	ENSDARG00000079947 (directed) ENSDARG00000041428	0.0512281	exact
zc3h14	2.42244	gfi1b	directed	ENSDARG00000079947 (directed) ENSDARG00000041402	false	directed	ENSDARG00000079947 (directed) ENSDARG00000041402	0.0548129	exact
setdb1a	2.34286	gfi1b	directed	ENSDARG00000079947 (directed) ENSDARG00000041243	true	directed	ENSDARG00000079947 (directed) ENSDARG00000041243	0.161978	exact
st3gal4	2.46228	gfi1b	directed	ENSDARG00000079947 (directed) ENSDARG00000041006	false	directed	ENSDARG00000079947 (directed) ENSDARG00000041006	0.0413821	exact
prickle1a	3.03813	gfi1b	directed	ENSDARG00000079947 (directed) ENSDARG00000040649	false	directed	ENSDARG00000079947 (directed) ENSDARG00000040649	0.0933736	exact
hvcn1	2.75833	gfi1b	directed	ENSDARG00000079947 (directed) ENSDARG00000040338	false	directed	ENSDARG00000079947 (directed) ENSDARG00000040338	0.0304741	exact
krcp	4.4246	gfi1b	directed	ENSDARG00000079947 (directed) ENSDARG00000040224	false	directed	ENSDARG00000079947 (directed) ENSDARG00000040224	0.125733	exact
cuedc2	4.16829	gfi1b	directed	ENSDARG00000079947 (directed) ENSDARG00000039365	false	directed	ENSDARG00000079947 (directed) ENSDARG00000039365	0.0875886	exact
tmem209	2.49091	gfi1b	directed	ENSDARG00000079947 (directed) ENSDARG00000039340	false	directed	ENSDARG00000079947 (directed) ENSDARG00000039340	0.0949265	exact
vps13a	2.55952	gfi1b	directed	ENSDARG00000079947 (directed) ENSDARG00000039225	false	directed	ENSDARG00000079947 (directed) ENSDARG00000039225	0.0668001	exact
slx4ip	2.8631	gfi1b	directed	ENSDARG00000079947 (directed) ENSDARG00000039069	false	directed	ENSDARG00000079947 (directed) ENSDARG00000039069	0.0817702	exact
fbxo5	3.21111	gfi1b	directed	ENSDARG00000079947 (directed) ENSDARG00000039020	false	directed	ENSDARG00000079947 (directed) ENSDARG00000039020	0.142655	exact
msl2a	2.31209	gfi1b	directed	ENSDARG00000079947 (directed) ENSDARG00000038909	false	directed	ENSDARG00000079947 (directed) ENSDARG00000038909	0.116718	exact
smc4	2.66313	gfi1b	directed	ENSDARG00000079947 (directed) ENSDARG00000038882	false	directed	ENSDARG00000079947 (directed) ENSDARG00000038882	0.145356	exact
gins3	2.5711	gfi1b	directed	ENSDARG00000079947 (directed) ENSDARG00000038847	false	directed	ENSDARG00000079947 (directed) ENSDARG00000038847	0.0906417	exact
plcg1	2.92302	gfi1b	directed	ENSDARG00000079947 (directed) ENSDARG00000038442	false	directed	ENSDARG00000079947 (directed) ENSDARG00000038442	0.111275	exact
hbbe3	2.0625	gfi1b	directed	ENSDARG00000079947 (directed) ENSDARG00000038147	false	directed	ENSDARG00000079947 (directed) ENSDARG00000038147	0.119305	exact
pdgfbb	2.59081	gfi1b	directed	ENSDARG00000079947 (directed) ENSDARG00000038139	false	directed	ENSDARG00000079947 (directed) ENSDARG00000038139	0.119145	exact
rbbp6	2.50404	gfi1b	directed	ENSDARG00000079947 (directed) ENSDARG00000037919	false	directed	ENSDARG00000079947 (directed) ENSDARG00000037919	0.115833	exact
plrg1	4.27778	gfi1b	directed	ENSDARG00000079947 (directed) ENSDARG00000037283	false	directed	ENSDARG00000079947 (directed) ENSDARG00000037283	0.0607323	exact
trmo	2.5131	gfi1b	directed	ENSDARG00000079947 (directed) ENSDARG00000037245	false	directed	ENSDARG00000079947 (directed) ENSDARG00000037245	0.0246283	exact
tpbgb	2.52132	gfi1b	directed	ENSDARG00000079947 (directed) ENSDARG00000037186	false	directed	ENSDARG00000079947 (directed) ENSDARG00000037186	0.078217	exact
asxl1	4.6873	gfi1b	directed	ENSDARG00000079947 (directed) ENSDARG00000036956	true	directed	ENSDARG00000079947 (directed) ENSDARG00000036956	0.152696	exact
dolpp1	2.35025	gfi1b	directed	ENSDARG00000079947 (directed) ENSDARG00000036915	false	directed	ENSDARG00000079947 (directed) ENSDARG00000036915	0.0668196	exact
bcl9	2.64835	gfi1b	directed	ENSDARG00000079947 (directed) ENSDARG00000036687	false	directed	ENSDARG00000079947 (directed) ENSDARG00000036687	0.14164	exact
aplnrb	1	gfi1b	directed	ENSDARG00000079947 (directed) ENSDARG00000036670	false	directed	ENSDARG00000079947 (directed) ENSDARG00000036670	0.101987	exact
gpr182	2.89167	gfi1b	directed	ENSDARG00000079947 (directed) ENSDARG00000036616	false	directed	ENSDARG00000079947 (directed) ENSDARG00000036616	0.111751	exact
cmtr2	2.11111	gfi1b	directed	ENSDARG00000079947 (directed) ENSDARG00000036345	false	directed	ENSDARG00000079947 (directed) ENSDARG00000036345	0.0767197	exact
ccnb2	3.56944	gfi1b	directed	ENSDARG00000079947 (directed) ENSDARG00000036180	false	directed	ENSDARG00000079947 (directed) ENSDARG00000036180	0.140586	exact
tdp2b	2.98016	gfi1b	directed	ENSDARG00000079947 (directed) ENSDARG00000035954	false	directed	ENSDARG00000079947 (directed) ENSDARG00000035954	0.0575465	exact
ube2c	2.98922	gfi1b	directed	ENSDARG00000079947 (directed) ENSDARG00000035770	false	directed	ENSDARG00000079947 (directed) ENSDARG00000035770	0.0829498	exact
pgam5	3.2548	gfi1b	directed	ENSDARG00000079947 (directed) ENSDARG00000035608	false	directed	ENSDARG00000079947 (directed) ENSDARG00000035608	0.0587916	exact
brwd3	3.03345	gfi1b	directed	ENSDARG00000079947 (directed) ENSDARG00000035540	true	directed	ENSDARG00000079947 (directed) ENSDARG00000035540	0.152811	exact
ubtf	2.96555	gfi1b	directed	ENSDARG00000079947 (directed) ENSDARG00000035066	false	directed	ENSDARG00000079947 (directed) ENSDARG00000035066	0.109739	exact
ncapd3	2.6345	gfi1b	directed	ENSDARG00000079947 (directed) ENSDARG00000034773	false	directed	ENSDARG00000079947 (directed) ENSDARG00000034773	0.122458	exact
slc4a1ap	2.25	gfi1b	directed	ENSDARG00000079947 (directed) ENSDARG00000034160	false	directed	ENSDARG00000079947 (directed) ENSDARG00000034160	0.0309544	exact
irx5a	5.0852	gfi1b	directed	ENSDARG00000079947 (directed) ENSDARG00000034043	false	directed	ENSDARG00000079947 (directed) ENSDARG00000034043	0.0968507	exact
jade1	2.20833	gfi1b	directed	ENSDARG00000079947 (directed) ENSDARG00000033707	false	directed	ENSDARG00000079947 (directed) ENSDARG00000033707	0.105027	exact
gpatch1	3.11667	gfi1b	directed	ENSDARG00000079947 (directed) ENSDARG00000033418	false	directed	ENSDARG00000079947 (directed) ENSDARG00000033418	0.0965091	exact
kif7	3.0428	gfi1b	directed	ENSDARG00000079947 (directed) ENSDARG00000033099	false	directed	ENSDARG00000079947 (directed) ENSDARG00000033099	0.0392892	exact
dtx2	2	gfi1b	directed	ENSDARG00000079947 (directed) ENSDARG00000032933	false	directed	ENSDARG00000079947 (directed) ENSDARG00000032933	0.143478	exact
si:ch211-244b2.1	2.13853	gfi1b	directed	ENSDARG00000079947 (directed) ENSDARG00000032627	false	directed	ENSDARG00000079947 (directed) ENSDARG00000032627	0.0479764	exact
epb41l5	2.17778	gfi1b	directed	ENSDARG00000079947 (directed) ENSDARG00000032324	false	directed	ENSDARG00000079947 (directed) ENSDARG00000032324	0.0875004	exact
anapc4	2.44762	gfi1b	directed	ENSDARG00000079947 (directed) ENSDARG00000032237	false	directed	ENSDARG00000079947 (directed) ENSDARG00000032237	0.0746331	exact
phactr4b	2.73377	gfi1b	directed	ENSDARG00000079947 (directed) ENSDARG00000032221	false	directed	ENSDARG00000079947 (directed) ENSDARG00000032221	0.121266	exact
tbx1	407.755	gfi1b	directed	ENSDARG00000079947 (directed) ENSDARG00000031891	false	directed	ENSDARG00000079947 (directed) ENSDARG00000031891	0.107797	exact
smad6b	466.143	gfi1b	directed	ENSDARG00000079947 (directed) ENSDARG00000031763	false	directed	ENSDARG00000079947 (directed) ENSDARG00000031763	0.0517199	exact
npr1a	2	gfi1b	directed	ENSDARG00000079947 (directed) ENSDARG00000031751	false	directed	ENSDARG00000079947 (directed) ENSDARG00000031751	0.0987265	exact
znhit2	2.96869	gfi1b	directed	ENSDARG00000079947 (directed) ENSDARG00000030805	false	directed	ENSDARG00000079947 (directed) ENSDARG00000030805	0.0859087	exact
lrrc42	3.40043	gfi1b	directed	ENSDARG00000079947 (directed) ENSDARG00000030591	false	directed	ENSDARG00000079947 (directed) ENSDARG00000030591	0.0894947	exact
gpkow	3.79238	gfi1b	directed	ENSDARG00000079947 (directed) ENSDARG00000029612	false	directed	ENSDARG00000079947 (directed) ENSDARG00000029612	0.0953628	exact
fbxo3	2.38452	gfi1b	directed	ENSDARG00000079947 (directed) ENSDARG00000029242	false	directed	ENSDARG00000079947 (directed) ENSDARG00000029242	0.0898723	exact
pus3	3.93344	gfi1b	directed	ENSDARG00000079947 (directed) ENSDARG00000028976	false	directed	ENSDARG00000079947 (directed) ENSDARG00000028976	0.099814	exact
hmga1a	2	gfi1b	directed	ENSDARG00000079947 (directed) ENSDARG00000028335	true	directed	ENSDARG00000079947 (directed) ENSDARG00000028335	0.161462	exact
sh2d3ca	4.51053	gfi1b	directed	ENSDARG00000079947 (directed) ENSDARG00000028099	false	directed	ENSDARG00000079947 (directed) ENSDARG00000028099	0.117212	exact
nus1	2.28258	gfi1b	directed	ENSDARG00000079947 (directed) ENSDARG00000027813	false	directed	ENSDARG00000079947 (directed) ENSDARG00000027813	0.06663	exact
nrp1b	2.38678	gfi1b	directed	ENSDARG00000079947 (directed) ENSDARG00000027290	false	directed	ENSDARG00000079947 (directed) ENSDARG00000027290	0.100219	exact
tbc1d22b	2.74167	gfi1b	directed	ENSDARG00000079947 (directed) ENSDARG00000026988	false	directed	ENSDARG00000079947 (directed) ENSDARG00000026988	0.0992971	exact
rexo1	1.37143	gfi1b	directed	ENSDARG00000079947 (directed) ENSDARG00000026986	false	directed	ENSDARG00000079947 (directed) ENSDARG00000026986	0.0833439	exact
gmds	3.74766	gfi1b	directed	ENSDARG00000079947 (directed) ENSDARG00000026629	false	directed	ENSDARG00000079947 (directed) ENSDARG00000026629	0.0664476	exact
mis12	4.63333	gfi1b	directed	ENSDARG00000079947 (directed) ENSDARG00000026454	false	directed	ENSDARG00000079947 (directed) ENSDARG00000026454	0.0913167	exact
rad51d	2.74275	gfi1b	directed	ENSDARG00000079947 (directed) ENSDARG00000026400	false	directed	ENSDARG00000079947 (directed) ENSDARG00000026400	0.0445225	exact
prpf8	2.72619	gfi1b	directed	ENSDARG00000079947 (directed) ENSDARG00000026180	false	directed	ENSDARG00000079947 (directed) ENSDARG00000026180	0.13923	exact
top2a	2.77778	gfi1b	directed	ENSDARG00000079947 (directed) ENSDARG00000024488	true	directed	ENSDARG00000079947 (directed) ENSDARG00000024488	0.167427	exact
uvrag	2.45525	gfi1b	directed	ENSDARG00000079947 (directed) ENSDARG00000023815	false	directed	ENSDARG00000079947 (directed) ENSDARG00000023815	0.0329323	exact
ntmt1	2.325	gfi1b	directed	ENSDARG00000079947 (directed) ENSDARG00000022399	false	directed	ENSDARG00000079947 (directed) ENSDARG00000022399	0.0702144	exact
tab2	2.41374	gfi1b	directed	ENSDARG00000079947 (directed) ENSDARG00000021509	false	directed	ENSDARG00000079947 (directed) ENSDARG00000021509	0.105193	exact
mcm3ap	2	gfi1b	directed	ENSDARG00000079947 (directed) ENSDARG00000021402	false	directed	ENSDARG00000079947 (directed) ENSDARG00000021402	0.116387	exact
ndc1	2.32613	gfi1b	directed	ENSDARG00000079947 (directed) ENSDARG00000021120	false	directed	ENSDARG00000079947 (directed) ENSDARG00000021120	0.116532	exact
rhbdd1	2.50758	gfi1b	directed	ENSDARG00000079947 (directed) ENSDARG00000021046	false	directed	ENSDARG00000079947 (directed) ENSDARG00000021046	0.0432259	exact
prkrirb	2.85378	gfi1b	directed	ENSDARG00000079947 (directed) ENSDARG00000020964	false	directed	ENSDARG00000079947 (directed) ENSDARG00000020964	0.106785	exact
mcrs1	3.1671	gfi1b	directed	ENSDARG00000079947 (directed) ENSDARG00000020840	false	directed	ENSDARG00000079947 (directed) ENSDARG00000020840	0.100038	exact
odf2b	2.77855	gfi1b	directed	ENSDARG00000079947 (directed) ENSDARG00000020702	false	directed	ENSDARG00000079947 (directed) ENSDARG00000020702	0.0966015	exact
nfe2l3	2.42444	gfi1b	directed	ENSDARG00000079947 (directed) ENSDARG00000019810	false	directed	ENSDARG00000079947 (directed) ENSDARG00000019810	0.110636	exact
bmpr1aa	2.93182	gfi1b	directed	ENSDARG00000079947 (directed) ENSDARG00000019728	false	directed	ENSDARG00000079947 (directed) ENSDARG00000019728	0.119311	exact
jade3	2.375	gfi1b	directed	ENSDARG00000079947 (directed) ENSDARG00000019614	false	directed	ENSDARG00000079947 (directed) ENSDARG00000019614	0.106351	exact
nrarpb	2.12222	gfi1b	directed	ENSDARG00000079947 (directed) ENSDARG00000018958	false	directed	ENSDARG00000079947 (directed) ENSDARG00000018958	0.0928226	exact
elk3	461.381	gfi1b	directed	ENSDARG00000079947 (directed) ENSDARG00000018688	false	directed	ENSDARG00000079947 (directed) ENSDARG00000018688	0.0422577	exact
rad54l	2.36234	gfi1b	directed	ENSDARG00000079947 (directed) ENSDARG00000018623	false	directed	ENSDARG00000079947 (directed) ENSDARG00000018623	0.101401	exact
ddx61	2.22222	gfi1b	directed	ENSDARG00000079947 (directed) ENSDARG00000018425	false	directed	ENSDARG00000079947 (directed) ENSDARG00000018425	0.13729	exact
pth1rb	2.82051	gfi1b	directed	ENSDARG00000079947 (directed) ENSDARG00000018418	false	directed	ENSDARG00000079947 (directed) ENSDARG00000018418	0.0949915	exact
arglu1b	2.11111	gfi1b	directed	ENSDARG00000079947 (directed) ENSDARG00000018319	false	directed	ENSDARG00000079947 (directed) ENSDARG00000018319	0.0940332	exact
srrt	2.84286	gfi1b	directed	ENSDARG00000079947 (directed) ENSDARG00000017762	false	directed	ENSDARG00000079947 (directed) ENSDARG00000017762	0.0849187	exact
arhgap29b	2.88971	gfi1b	directed	ENSDARG00000079947 (directed) ENSDARG00000017748	false	directed	ENSDARG00000079947 (directed) ENSDARG00000017748	0.0513032	exact
ccdc6b	2.09091	gfi1b	directed	ENSDARG00000079947 (directed) ENSDARG00000017595	false	directed	ENSDARG00000079947 (directed) ENSDARG00000017595	0.0938236	exact
ctdp1	2	gfi1b	directed	ENSDARG00000079947 (directed) ENSDARG00000017522	false	directed	ENSDARG00000079947 (directed) ENSDARG00000017522	0.105992	exact
klf1	228.32	gfi1b	directed	ENSDARG00000079947 (directed) ENSDARG00000017400	false	directed	ENSDARG00000079947 (directed) ENSDARG00000017400	0.123205	exact
mettl8	3.66706	gfi1b	directed	ENSDARG00000079947 (directed) ENSDARG00000017359	false	directed	ENSDARG00000079947 (directed) ENSDARG00000017359	0.0869048	exact
epha2a	2.37262	gfi1b	directed	ENSDARG00000079947 (directed) ENSDARG00000017354	false	directed	ENSDARG00000079947 (directed) ENSDARG00000017354	0.120335	exact
gpsm2	2.41313	gfi1b	directed	ENSDARG00000079947 (directed) ENSDARG00000017311	false	directed	ENSDARG00000079947 (directed) ENSDARG00000017311	0.0633427	exact
lin28a	2.27534	gfi1b	directed	ENSDARG00000079947 (directed) ENSDARG00000016999	false	directed	ENSDARG00000079947 (directed) ENSDARG00000016999	0.120839	exact
wdr5	4.98571	gfi1b	directed	ENSDARG00000079947 (directed) ENSDARG00000016903	false	directed	ENSDARG00000079947 (directed) ENSDARG00000016903	0.123884	exact
srsf6b	2.07143	gfi1b	directed	ENSDARG00000079947 (directed) ENSDARG00000016783	false	directed	ENSDARG00000079947 (directed) ENSDARG00000016783	0.118157	exact
trim33	2.17778	gfi1b	directed	ENSDARG00000079947 (directed) ENSDARG00000016181	true	directed	ENSDARG00000079947 (directed) ENSDARG00000016181	0.161875	exact
gins4	2.94697	gfi1b	directed	ENSDARG00000079947 (directed) ENSDARG00000016044	false	directed	ENSDARG00000079947 (directed) ENSDARG00000016044	0.0860515	exact
rabgef1l	2.33333	gfi1b	directed	ENSDARG00000079947 (directed) ENSDARG00000015968	false	directed	ENSDARG00000079947 (directed) ENSDARG00000015968	0.0662147	exact
lemd3	2.04762	gfi1b	directed	ENSDARG00000079947 (directed) ENSDARG00000015824	false	directed	ENSDARG00000079947 (directed) ENSDARG00000015824	0.105591	exact
smcr8b	1.11111	gfi1b	directed	ENSDARG00000079947 (directed) ENSDARG00000015803	false	directed	ENSDARG00000079947 (directed) ENSDARG00000015803	0.0777446	exact
znf207a	2.79692	gfi1b	directed	ENSDARG00000079947 (directed) ENSDARG00000015538	false	directed	ENSDARG00000079947 (directed) ENSDARG00000015538	0.0947748	exact
hdac1	4.10043	gfi1b	directed	ENSDARG00000079947 (directed) ENSDARG00000015427	false	directed	ENSDARG00000079947 (directed) ENSDARG00000015427	0.0927189	exact
st3gal3b	2.07692	gfi1b	directed	ENSDARG00000079947 (directed) ENSDARG00000015252	false	directed	ENSDARG00000079947 (directed) ENSDARG00000015252	0.0952856	exact
hnrnpua	2.20536	gfi1b	directed	ENSDARG00000079947 (directed) ENSDARG00000015206	false	directed	ENSDARG00000079947 (directed) ENSDARG00000015206	0.120203	exact
ankhb	2.25946	gfi1b	directed	ENSDARG00000079947 (directed) ENSDARG00000014969	false	directed	ENSDARG00000079947 (directed) ENSDARG00000014969	0.140944	exact
kif23	3.30758	gfi1b	directed	ENSDARG00000079947 (directed) ENSDARG00000014943	false	directed	ENSDARG00000079947 (directed) ENSDARG00000014943	0.119462	exact
esco2	2.19841	gfi1b	directed	ENSDARG00000079947 (directed) ENSDARG00000014685	false	directed	ENSDARG00000079947 (directed) ENSDARG00000014685	0.111218	exact
znf710a	2.22619	gfi1b	directed	ENSDARG00000079947 (directed) ENSDARG00000014680	false	directed	ENSDARG00000079947 (directed) ENSDARG00000014680	0.0696018	exact
si:dkey-14d8.2	2.32534	gfi1b	directed	ENSDARG00000079947 (directed) ENSDARG00000014395	false	directed	ENSDARG00000079947 (directed) ENSDARG00000014395	0.047864	exact
ildr2	2.47619	gfi1b	directed	ENSDARG00000079947 (directed) ENSDARG00000014180	false	directed	ENSDARG00000079947 (directed) ENSDARG00000014180	0.106221	exact
cldn5b	2.59583	gfi1b	directed	ENSDARG00000079947 (directed) ENSDARG00000014059	false	directed	ENSDARG00000079947 (directed) ENSDARG00000014059	0.101344	exact
rrm1	2.24286	gfi1b	directed	ENSDARG00000079947 (directed) ENSDARG00000014017	false	directed	ENSDARG00000079947 (directed) ENSDARG00000014017	0.101502	exact
zgc:77086	3.01273	gfi1b	directed	ENSDARG00000079947 (directed) ENSDARG00000014015	false	directed	ENSDARG00000079947 (directed) ENSDARG00000014015	0.0695053	exact
lbr	2.66908	gfi1b	directed	ENSDARG00000079947 (directed) ENSDARG00000014013	true	directed	ENSDARG00000079947 (directed) ENSDARG00000014013	0.160205	exact
cwc22	2.19167	gfi1b	directed	ENSDARG00000079947 (directed) ENSDARG00000014008	false	directed	ENSDARG00000079947 (directed) ENSDARG00000014008	0.118669	exact
gtse1	2.66577	gfi1b	directed	ENSDARG00000079947 (directed) ENSDARG00000013719	false	directed	ENSDARG00000079947 (directed) ENSDARG00000013719	0.0683367	exact
ppp6r3	2.22143	gfi1b	directed	ENSDARG00000079947 (directed) ENSDARG00000013379	false	directed	ENSDARG00000079947 (directed) ENSDARG00000013379	0.105488	exact
znf76	1.32224	gfi1b	directed	ENSDARG00000079947 (directed) ENSDARG00000013279	false	directed	ENSDARG00000079947 (directed) ENSDARG00000013279	0.064752	exact
ints6	4.79841	gfi1b	directed	ENSDARG00000079947 (directed) ENSDARG00000013025	false	directed	ENSDARG00000079947 (directed) ENSDARG00000013025	0.097745	exact
ammecr1	2.23377	gfi1b	directed	ENSDARG00000079947 (directed) ENSDARG00000012892	false	directed	ENSDARG00000079947 (directed) ENSDARG00000012892	0.106406	exact
mettl3	2.57692	gfi1b	directed	ENSDARG00000079947 (directed) ENSDARG00000012827	false	directed	ENSDARG00000079947 (directed) ENSDARG00000012827	0.0955465	exact
csnk2a2a	2	gfi1b	directed	ENSDARG00000079947 (directed) ENSDARG00000012818	false	directed	ENSDARG00000079947 (directed) ENSDARG00000012818	0.0655214	exact
rbm14a	2.6	gfi1b	directed	ENSDARG00000079947 (directed) ENSDARG00000012723	false	directed	ENSDARG00000079947 (directed) ENSDARG00000012723	0.11459	exact
waca	2.71313	gfi1b	directed	ENSDARG00000079947 (directed) ENSDARG00000012577	false	directed	ENSDARG00000079947 (directed) ENSDARG00000012577	0.141382	exact
kif15	2.11111	gfi1b	directed	ENSDARG00000079947 (directed) ENSDARG00000012073	false	directed	ENSDARG00000079947 (directed) ENSDARG00000012073	0.1212	exact
mob2b	2.28175	gfi1b	directed	ENSDARG00000079947 (directed) ENSDARG00000012005	false	directed	ENSDARG00000079947 (directed) ENSDARG00000012005	0.0901117	exact
pigo	2.13248	gfi1b	directed	ENSDARG00000079947 (directed) ENSDARG00000011743	false	directed	ENSDARG00000079947 (directed) ENSDARG00000011743	0.0814749	exact
atxn2l	2.44317	gfi1b	directed	ENSDARG00000079947 (directed) ENSDARG00000011597	false	directed	ENSDARG00000079947 (directed) ENSDARG00000011597	0.0907303	exact
calcrlb	2.39643	gfi1b	directed	ENSDARG00000079947 (directed) ENSDARG00000011571	false	directed	ENSDARG00000079947 (directed) ENSDARG00000011571	0.0969571	exact
cahz	2.46581	gfi1b	directed	ENSDARG00000079947 (directed) ENSDARG00000011166	false	directed	ENSDARG00000079947 (directed) ENSDARG00000011166	0.126297	exact
kif11	1.78333	gfi1b	directed	ENSDARG00000079947 (directed) ENSDARG00000010948	false	directed	ENSDARG00000079947 (directed) ENSDARG00000010948	0.132185	exact
tlk2	2.26418	gfi1b	directed	ENSDARG00000079947 (directed) ENSDARG00000010779	false	directed	ENSDARG00000079947 (directed) ENSDARG00000010779	0.108933	exact
sae1	3.31948	gfi1b	directed	ENSDARG00000079947 (directed) ENSDARG00000010487	false	directed	ENSDARG00000079947 (directed) ENSDARG00000010487	0.111581	exact
npsnl	2.34722	gfi1b	directed	ENSDARG00000079947 (directed) ENSDARG00000010423	false	directed	ENSDARG00000079947 (directed) ENSDARG00000010423	0.0866959	exact
si:ch211-26b3.2	2.22619	gfi1b	directed	ENSDARG00000079947 (directed) ENSDARG00000010331	false	directed	ENSDARG00000079947 (directed) ENSDARG00000010331	0.0891161	exact
gigfy2	2.29167	gfi1b	directed	ENSDARG00000079947 (directed) ENSDARG00000009735	false	directed	ENSDARG00000079947 (directed) ENSDARG00000009735	0.064748	exact
kif21b	2.11429	gfi1b	directed	ENSDARG00000079947 (directed) ENSDARG00000009733	false	directed	ENSDARG00000079947 (directed) ENSDARG00000009733	0.04425	exact
rpn2	3.27143	gfi1b	directed	ENSDARG00000079947 (directed) ENSDARG00000009724	false	directed	ENSDARG00000079947 (directed) ENSDARG00000009724	0.100548	exact
unc119.1	3.28737	gfi1b	directed	ENSDARG00000079947 (directed) ENSDARG00000009629	false	directed	ENSDARG00000079947 (directed) ENSDARG00000009629	0.0999991	exact
prkcda	2.60317	gfi1b	directed	ENSDARG00000079947 (directed) ENSDARG00000009208	false	directed	ENSDARG00000079947 (directed) ENSDARG00000009208	0.082749	exact
tnikb	2.35942	gfi1b	directed	ENSDARG00000079947 (directed) ENSDARG00000009031	false	directed	ENSDARG00000079947 (directed) ENSDARG00000009031	0.133295	exact
rtf1	2.23168	gfi1b	directed	ENSDARG00000079947 (directed) ENSDARG00000008947	false	directed	ENSDARG00000079947 (directed) ENSDARG00000008947	0.108294	exact
elp4	2.95117	gfi1b	directed	ENSDARG00000079947 (directed) ENSDARG00000008852	false	directed	ENSDARG00000079947 (directed) ENSDARG00000008852	0.05488	exact
znfl2a	3.10278	gfi1b	directed	ENSDARG00000079947 (directed) ENSDARG00000008333	false	directed	ENSDARG00000079947 (directed) ENSDARG00000008333	0.130808	exact
rcor2	1.11111	gfi1b	directed	ENSDARG00000079947 (directed) ENSDARG00000008278	false	directed	ENSDARG00000079947 (directed) ENSDARG00000008278	0.091898	exact
mia3	2.16667	gfi1b	directed	ENSDARG00000079947 (directed) ENSDARG00000008184	false	directed	ENSDARG00000079947 (directed) ENSDARG00000008184	0.109789	exact
sp3b	2.25	gfi1b	directed	ENSDARG00000079947 (directed) ENSDARG00000007812	false	directed	ENSDARG00000079947 (directed) ENSDARG00000007812	0.104516	exact
tmpoa	2.15	gfi1b	directed	ENSDARG00000079947 (directed) ENSDARG00000007315	false	directed	ENSDARG00000079947 (directed) ENSDARG00000007315	0.0997976	exact
si:ch211-195b21.5	5.64802	gfi1b	directed	ENSDARG00000079947 (directed) ENSDARG00000007204	false	directed	ENSDARG00000079947 (directed) ENSDARG00000007204	0.0891769	exact
nadk2	2.50232	gfi1b	directed	ENSDARG00000079947 (directed) ENSDARG00000007181	false	directed	ENSDARG00000079947 (directed) ENSDARG00000007181	0.078665	exact
tbx6l	435.939	gfi1b	directed	ENSDARG00000079947 (directed) ENSDARG00000006939	false	directed	ENSDARG00000079947 (directed) ENSDARG00000006939	0.121008	exact
impdh2	2.45536	gfi1b	directed	ENSDARG00000079947 (directed) ENSDARG00000006900	false	directed	ENSDARG00000079947 (directed) ENSDARG00000006900	0.0947818	exact
urod	2.5265	gfi1b	directed	ENSDARG00000079947 (directed) ENSDARG00000006818	false	directed	ENSDARG00000079947 (directed) ENSDARG00000006818	0.0245412	exact
mllt3	2.2881	gfi1b	directed	ENSDARG00000079947 (directed) ENSDARG00000006754	false	directed	ENSDARG00000079947 (directed) ENSDARG00000006754	0.134471	exact
ppp2r2ab	2.93258	gfi1b	directed	ENSDARG00000079947 (directed) ENSDARG00000006624	false	directed	ENSDARG00000079947 (directed) ENSDARG00000006624	0.0973688	exact
brd3a	4.42619	gfi1b	directed	ENSDARG00000079947 (directed) ENSDARG00000006527	true	directed	ENSDARG00000079947 (directed) ENSDARG00000006527	0.162555	exact
supt6h	3.68333	gfi1b	directed	ENSDARG00000079947 (directed) ENSDARG00000006524	false	directed	ENSDARG00000079947 (directed) ENSDARG00000006524	0.0888128	exact
crlf1b	2.86991	gfi1b	directed	ENSDARG00000079947 (directed) ENSDARG00000006368	false	directed	ENSDARG00000079947 (directed) ENSDARG00000006368	0.0985098	exact
uck2a	2.8547	gfi1b	directed	ENSDARG00000079947 (directed) ENSDARG00000006074	false	directed	ENSDARG00000079947 (directed) ENSDARG00000006074	0.103935	exact
mycla	2.375	gfi1b	directed	ENSDARG00000079947 (directed) ENSDARG00000006003	false	directed	ENSDARG00000079947 (directed) ENSDARG00000006003	0.0941846	exact
gon4l	2.15873	gfi1b	directed	ENSDARG00000079947 (directed) ENSDARG00000005867	false	directed	ENSDARG00000079947 (directed) ENSDARG00000005867	0.0887115	exact
tsr2	3.91475	gfi1b	directed	ENSDARG00000079947 (directed) ENSDARG00000005772	false	directed	ENSDARG00000079947 (directed) ENSDARG00000005772	0.0862251	exact
man1a1	2.05556	gfi1b	directed	ENSDARG00000079947 (directed) ENSDARG00000005652	false	directed	ENSDARG00000079947 (directed) ENSDARG00000005652	0.0633024	exact
tacc3	2.40556	gfi1b	directed	ENSDARG00000079947 (directed) ENSDARG00000005454	false	directed	ENSDARG00000079947 (directed) ENSDARG00000005454	0.113462	exact
mcamb	2.6125	gfi1b	directed	ENSDARG00000079947 (directed) ENSDARG00000005368	false	directed	ENSDARG00000079947 (directed) ENSDARG00000005368	0.0697835	exact
cep89	3.82294	gfi1b	directed	ENSDARG00000079947 (directed) ENSDARG00000005092	false	directed	ENSDARG00000079947 (directed) ENSDARG00000005092	0.133553	exact
gtf3c2	2.26716	gfi1b	directed	ENSDARG00000079947 (directed) ENSDARG00000004574	false	directed	ENSDARG00000079947 (directed) ENSDARG00000004574	0.0990051	exact
fmnl3	2.24632	gfi1b	directed	ENSDARG00000079947 (directed) ENSDARG00000004372	false	directed	ENSDARG00000079947 (directed) ENSDARG00000004372	0.14233	exact
acsbg2	2.83952	gfi1b	directed	ENSDARG00000079947 (directed) ENSDARG00000004094	false	directed	ENSDARG00000079947 (directed) ENSDARG00000004094	0.0936228	exact
gorasp1a	2.42741	gfi1b	directed	ENSDARG00000079947 (directed) ENSDARG00000003068	false	directed	ENSDARG00000079947 (directed) ENSDARG00000003068	0.0626011	exact
gbx2	2.50694	gfi1b	directed	ENSDARG00000079947 (directed) ENSDARG00000002933	false	directed	ENSDARG00000079947 (directed) ENSDARG00000002933	0.0983884	exact
mief2	2.20833	gfi1b	directed	ENSDARG00000079947 (directed) ENSDARG00000002377	false	directed	ENSDARG00000079947 (directed) ENSDARG00000002377	0.0233421	exact
rhd	1.40877	gfi1b	directed	ENSDARG00000079947 (directed) ENSDARG00000002194	false	directed	ENSDARG00000079947 (directed) ENSDARG00000002194	0.130196	exact
sp3a	2.15873	gfi1b	directed	ENSDARG00000079947 (directed) ENSDARG00000001549	false	directed	ENSDARG00000079947 (directed) ENSDARG00000001549	0.127113	exact
g2e3	2.44915	gfi1b	directed	ENSDARG00000079947 (directed) ENSDARG00000001313	false	directed	ENSDARG00000079947 (directed) ENSDARG00000001313	0.102941	exact
zgc:112234	3.98492	pou5f3	directed	ENSDARG00000044774 (directed) ENSDARG00000105393	false	directed	ENSDARG00000044774 (directed) ENSDARG00000105393	0.0525989	exact
ENSDARG00000105174	23.0714	pou5f3	directed	ENSDARG00000044774 (directed) ENSDARG00000105174	false	directed	ENSDARG00000044774 (directed) ENSDARG00000105174	0.0210145	exact
shkbp1	1.43182	pou5f3	directed	ENSDARG00000044774 (directed) ENSDARG00000105050	false	directed	ENSDARG00000044774 (directed) ENSDARG00000105050	0.0434783	exact
chek1	6.39692	pou5f3	directed	ENSDARG00000044774 (directed) ENSDARG00000104765	false	directed	ENSDARG00000044774 (directed) ENSDARG00000104765	0.0447209	exact
zgc:112234	2.47855	pou5f3	directed	ENSDARG00000044774 (directed) ENSDARG00000104588	false	directed	ENSDARG00000044774 (directed) ENSDARG00000104588	0.0359451	exact
LOC100329290	2.10059	pou5f3	directed	ENSDARG00000044774 (directed) ENSDARG00000104554	false	directed	ENSDARG00000044774 (directed) ENSDARG00000104554	0.0679697	exact
LOC100329560	2.18545	pou5f3	directed	ENSDARG00000044774 (directed) ENSDARG00000104501	false	directed	ENSDARG00000044774 (directed) ENSDARG00000104501	0.0795662	exact
smchd1	1.76825	pou5f3	directed	ENSDARG00000044774 (directed) ENSDARG00000104374	false	directed	ENSDARG00000044774 (directed) ENSDARG00000104374	0.0807768	exact
cdc42bpaa	2.18486	pou5f3	directed	ENSDARG00000044774 (directed) ENSDARG00000104283	false	directed	ENSDARG00000044774 (directed) ENSDARG00000104283	0.018623	exact
si:ch73-152o7.1	6.44683	pou5f3	directed	ENSDARG00000044774 (directed) ENSDARG00000104178	false	directed	ENSDARG00000044774 (directed) ENSDARG00000104178	0.0214611	exact
si:ch211-212k18.4	2.29147	pou5f3	directed	ENSDARG00000044774 (directed) ENSDARG00000104169	false	directed	ENSDARG00000044774 (directed) ENSDARG00000104169	0.0459916	exact
fzd4	1.35175	pou5f3	directed	ENSDARG00000044774 (directed) ENSDARG00000104117	false	directed	ENSDARG00000044774 (directed) ENSDARG00000104117	0.0187795	exact
chd1	1.60394	pou5f3	directed	ENSDARG00000044774 (directed) ENSDARG00000103787	false	directed	ENSDARG00000044774 (directed) ENSDARG00000103787	0.087679	exact
cirbpa	1.99071	pou5f3	directed	ENSDARG00000044774 (directed) ENSDARG00000103672	false	directed	ENSDARG00000044774 (directed) ENSDARG00000103672	0.0580947	exact
ENSDARG00000103525	2.50311	pou5f3	directed	ENSDARG00000044774 (directed) ENSDARG00000103525	false	directed	ENSDARG00000044774 (directed) ENSDARG00000103525	0.0520678	exact
rrp1	19.6683	pou5f3	directed	ENSDARG00000044774 (directed) ENSDARG00000103337	false	directed	ENSDARG00000044774 (directed) ENSDARG00000103337	0.0465376	exact
gpr107	1.94444	pou5f3	directed	ENSDARG00000044774 (directed) ENSDARG00000103200	false	directed	ENSDARG00000044774 (directed) ENSDARG00000103200	0.0118986	exact
LOC101882667	5.97345	pou5f3	directed	ENSDARG00000044774 (directed) ENSDARG00000103157	false	directed	ENSDARG00000044774 (directed) ENSDARG00000103157	0.032186	exact
si:dkey-237i9.8	2.1373	pou5f3	directed	ENSDARG00000044774 (directed) ENSDARG00000103020	false	directed	ENSDARG00000044774 (directed) ENSDARG00000103020	0.0288156	exact
2015-09-01	2.17438	pou5f3	directed	ENSDARG00000044774 (directed) ENSDARG00000102889	false	directed	ENSDARG00000044774 (directed) ENSDARG00000102889	0.0670607	exact
baz1b	1.28254	pou5f3	directed	ENSDARG00000044774 (directed) ENSDARG00000102832	false	directed	ENSDARG00000044774 (directed) ENSDARG00000102832	0.0820998	exact
zgc:112234	2.96452	pou5f3	directed	ENSDARG00000044774 (directed) ENSDARG00000102806	false	directed	ENSDARG00000044774 (directed) ENSDARG00000102806	0.0790899	exact
tmem39a	1.86436	pou5f3	directed	ENSDARG00000044774 (directed) ENSDARG00000102746	false	directed	ENSDARG00000044774 (directed) ENSDARG00000102746	0.0580511	exact
ENSDARG00000102428	1.36587	pou5f3	directed	ENSDARG00000044774 (directed) ENSDARG00000102428	false	directed	ENSDARG00000044774 (directed) ENSDARG00000102428	0.0156537	exact
xrn2	1.77004	pou5f3	directed	ENSDARG00000044774 (directed) ENSDARG00000101900	false	directed	ENSDARG00000044774 (directed) ENSDARG00000101900	0.0867857	exact
si:ch211-243p7.3	3.0178	pou5f3	directed	ENSDARG00000044774 (directed) ENSDARG00000101823	false	directed	ENSDARG00000044774 (directed) ENSDARG00000101823	0.0476807	exact
zgc:152816	2.5428	pou5f3	directed	ENSDARG00000044774 (directed) ENSDARG00000101808	false	directed	ENSDARG00000044774 (directed) ENSDARG00000101808	0.0452754	exact
ENSDARG00000101720	26.3929	pou5f3	directed	ENSDARG00000044774 (directed) ENSDARG00000101720	false	directed	ENSDARG00000044774 (directed) ENSDARG00000101720	0.0831786	exact
ENSDARG00000101477	2.34286	pou5f3	directed	ENSDARG00000044774 (directed) ENSDARG00000101477	false	directed	ENSDARG00000044774 (directed) ENSDARG00000101477	0.0251985	exact
acrc	1.97543	pou5f3	directed	ENSDARG00000044774 (directed) ENSDARG00000101060	false	directed	ENSDARG00000044774 (directed) ENSDARG00000101060	0.0926684	exact
ep300a	3.39448	pou5f3	directed	ENSDARG00000044774 (directed) ENSDARG00000100666	false	directed	ENSDARG00000044774 (directed) ENSDARG00000100666	0.0633552	exact
egfl7	1.34835	pou5f3	directed	ENSDARG00000044774 (directed) ENSDARG00000100657	false	directed	ENSDARG00000044774 (directed) ENSDARG00000100657	0.0533168	exact
trrap	1.93963	pou5f3	directed	ENSDARG00000044774 (directed) ENSDARG00000100623	false	directed	ENSDARG00000044774 (directed) ENSDARG00000100623	0.0823525	exact
sos1	3.99802	pou5f3	directed	ENSDARG00000044774 (directed) ENSDARG00000100503	false	directed	ENSDARG00000044774 (directed) ENSDARG00000100503	0.0221211	exact
nploc4	2.51035	pou5f3	directed	ENSDARG00000044774 (directed) ENSDARG00000100487	false	directed	ENSDARG00000044774 (directed) ENSDARG00000100487	0.0435407	exact
zgc:63694	1.56502	pou5f3	directed	ENSDARG00000044774 (directed) ENSDARG00000100227	false	directed	ENSDARG00000044774 (directed) ENSDARG00000100227	0.0506604	exact
tbce	1.83162	pou5f3	directed	ENSDARG00000044774 (directed) ENSDARG00000099921	false	directed	ENSDARG00000044774 (directed) ENSDARG00000099921	0.0313727	exact
ebf1a	3.69081	pou5f3	directed	ENSDARG00000044774 (directed) ENSDARG00000099849	false	directed	ENSDARG00000044774 (directed) ENSDARG00000099849	0.0458497	exact
si:dkey-93h22.7	3.51948	pou5f3	directed	ENSDARG00000044774 (directed) ENSDARG00000099600	false	directed	ENSDARG00000044774 (directed) ENSDARG00000099600	0.0556455	exact
zgc:112234	5.4373	pou5f3	directed	ENSDARG00000044774 (directed) ENSDARG00000099514	false	directed	ENSDARG00000044774 (directed) ENSDARG00000099514	0.0461219	exact
cnn3a	1	pou5f3	directed	ENSDARG00000044774 (directed) ENSDARG00000099510	false	directed	ENSDARG00000044774 (directed) ENSDARG00000099510	0.0424867	exact
fbxw5	2.61849	pou5f3	directed	ENSDARG00000044774 (directed) ENSDARG00000099139	false	directed	ENSDARG00000044774 (directed) ENSDARG00000099139	0.0215796	exact
sbno1	1.93313	pou5f3	directed	ENSDARG00000044774 (directed) ENSDARG00000099080	false	directed	ENSDARG00000044774 (directed) ENSDARG00000099080	0.0682241	exact
LOC100334018	3.44683	pou5f3	directed	ENSDARG00000044774 (directed) ENSDARG00000099078	false	directed	ENSDARG00000044774 (directed) ENSDARG00000099078	0.0443226	exact
setdb1b	4.34372	pou5f3	directed	ENSDARG00000044774 (directed) ENSDARG00000099021	false	directed	ENSDARG00000044774 (directed) ENSDARG00000099021	0.0860471	exact
wnk4a	3.29071	pou5f3	directed	ENSDARG00000044774 (directed) ENSDARG00000098550	false	directed	ENSDARG00000044774 (directed) ENSDARG00000098550	0.045989	exact
ENSDARG00000098503	2.04682	pou5f3	directed	ENSDARG00000044774 (directed) ENSDARG00000098503	false	directed	ENSDARG00000044774 (directed) ENSDARG00000098503	0.0282421	exact
bola3	4.49607	pou5f3	directed	ENSDARG00000044774 (directed) ENSDARG00000098130	false	directed	ENSDARG00000044774 (directed) ENSDARG00000098130	0.0264931	exact
si:ch211-129o18.4	2.75642	pou5f3	directed	ENSDARG00000044774 (directed) ENSDARG00000098029	false	directed	ENSDARG00000044774 (directed) ENSDARG00000098029	0.0247532	exact
ENSDARG00000097600	1.36783	pou5f3	directed	ENSDARG00000044774 (directed) ENSDARG00000097600	false	directed	ENSDARG00000044774 (directed) ENSDARG00000097600	0.0199008	exact
si:dkey-6e2.2	3.04253	pou5f3	directed	ENSDARG00000044774 (directed) ENSDARG00000097496	false	directed	ENSDARG00000044774 (directed) ENSDARG00000097496	0.0263969	exact
si:ch211-40k21.5	5.92226	pou5f3	directed	ENSDARG00000044774 (directed) ENSDARG00000097264	false	directed	ENSDARG00000044774 (directed) ENSDARG00000097264	0.0483022	exact
ENSDARG00000096855	2.7556	pou5f3	directed	ENSDARG00000044774 (directed) ENSDARG00000096855	false	directed	ENSDARG00000044774 (directed) ENSDARG00000096855	0.0373239	exact
blvrb	2.19878	pou5f3	directed	ENSDARG00000044774 (directed) ENSDARG00000096829	false	directed	ENSDARG00000044774 (directed) ENSDARG00000096829	0.0189091	exact
si:dkey-66i24.9	5.15833	pou5f3	directed	ENSDARG00000044774 (directed) ENSDARG00000096689	false	directed	ENSDARG00000044774 (directed) ENSDARG00000096689	0.0431775	exact
spp2	6.16786	pou5f3	directed	ENSDARG00000044774 (directed) ENSDARG00000095590	false	directed	ENSDARG00000044774 (directed) ENSDARG00000095590	0.026085	exact
ENSDARG00000095304	2.0334	pou5f3	directed	ENSDARG00000044774 (directed) ENSDARG00000095304	false	directed	ENSDARG00000044774 (directed) ENSDARG00000095304	0.022872	exact
si:ch211-113a14.15	2.67222	pou5f3	directed	ENSDARG00000044774 (directed) ENSDARG00000094744	false	directed	ENSDARG00000044774 (directed) ENSDARG00000094744	0.0799842	exact
ENSDARG00000094193	2.28501	pou5f3	directed	ENSDARG00000044774 (directed) ENSDARG00000094193	false	directed	ENSDARG00000044774 (directed) ENSDARG00000094193	0.0151049	exact
si:ch73-376l24.6	2.49521	pou5f3	directed	ENSDARG00000044774 (directed) ENSDARG00000093999	false	directed	ENSDARG00000044774 (directed) ENSDARG00000093999	0.0300186	exact
ENSDARG00000093469	1.60595	pou5f3	directed	ENSDARG00000044774 (directed) ENSDARG00000093469	false	directed	ENSDARG00000044774 (directed) ENSDARG00000093469	0.0365756	exact
swsap1	2.71786	pou5f3	directed	ENSDARG00000044774 (directed) ENSDARG00000093423	false	directed	ENSDARG00000044774 (directed) ENSDARG00000093423	0.0384897	exact
ENSDARG00000093422	6.11429	pou5f3	directed	ENSDARG00000044774 (directed) ENSDARG00000093422	false	directed	ENSDARG00000044774 (directed) ENSDARG00000093422	0.0156784	exact
si:dkey-261m9.6	4.33452	pou5f3	directed	ENSDARG00000044774 (directed) ENSDARG00000093195	false	directed	ENSDARG00000044774 (directed) ENSDARG00000093195	0.0676277	exact
LOC101883115	1.94478	pou5f3	directed	ENSDARG00000044774 (directed) ENSDARG00000092949	false	directed	ENSDARG00000044774 (directed) ENSDARG00000092949	0.0155717	exact
si:dkey-108k21.17	2.34587	pou5f3	directed	ENSDARG00000044774 (directed) ENSDARG00000092743	false	directed	ENSDARG00000044774 (directed) ENSDARG00000092743	0.0686266	exact
thbd	1.2	pou5f3	directed	ENSDARG00000044774 (directed) ENSDARG00000092470	false	directed	ENSDARG00000044774 (directed) ENSDARG00000092470	0.0288531	exact
rhbdd2	5.09246	pou5f3	directed	ENSDARG00000044774 (directed) ENSDARG00000092463	false	directed	ENSDARG00000044774 (directed) ENSDARG00000092463	0.0351639	exact
zgc:153352	4.15278	pou5f3	directed	ENSDARG00000044774 (directed) ENSDARG00000092445	false	directed	ENSDARG00000044774 (directed) ENSDARG00000092445	0.0326451	exact
gas5	3.77341	pou5f3	directed	ENSDARG00000044774 (directed) ENSDARG00000092337	false	directed	ENSDARG00000044774 (directed) ENSDARG00000092337	0.0317564	exact
znf106b	7.12857	pou5f3	directed	ENSDARG00000044774 (directed) ENSDARG00000091947	false	directed	ENSDARG00000044774 (directed) ENSDARG00000091947	0.0492503	exact
mapkap1	2.43168	pou5f3	directed	ENSDARG00000044774 (directed) ENSDARG00000091777	false	directed	ENSDARG00000044774 (directed) ENSDARG00000091777	0.0453981	exact
zbtb40	2.43017	pou5f3	directed	ENSDARG00000044774 (directed) ENSDARG00000091762	false	directed	ENSDARG00000044774 (directed) ENSDARG00000091762	0.0158101	exact
zgc:114046	1.99924	pou5f3	directed	ENSDARG00000044774 (directed) ENSDARG00000091728	false	directed	ENSDARG00000044774 (directed) ENSDARG00000091728	0.0566341	exact
suox	4.93254	pou5f3	directed	ENSDARG00000044774 (directed) ENSDARG00000091574	false	directed	ENSDARG00000044774 (directed) ENSDARG00000091574	0.022593	exact
nfrkb	2.13492	pou5f3	directed	ENSDARG00000044774 (directed) ENSDARG00000091512	false	directed	ENSDARG00000044774 (directed) ENSDARG00000091512	0.0581839	exact
ENSDARG00000091321	5.52341	pou5f3	directed	ENSDARG00000044774 (directed) ENSDARG00000091321	false	directed	ENSDARG00000044774 (directed) ENSDARG00000091321	0.0632486	exact
si:dkeyp-115e12.6	1.37424	pou5f3	directed	ENSDARG00000044774 (directed) ENSDARG00000090986	false	directed	ENSDARG00000044774 (directed) ENSDARG00000090986	0.0666761	exact
rnf219	1.9632	pou5f3	directed	ENSDARG00000044774 (directed) ENSDARG00000090904	false	directed	ENSDARG00000044774 (directed) ENSDARG00000090904	0.0596972	exact
zp3.1	4.50119	pou5f3	directed	ENSDARG00000044774 (directed) ENSDARG00000090768	false	directed	ENSDARG00000044774 (directed) ENSDARG00000090768	0.0123755	exact
gapvd1	1.86783	pou5f3	directed	ENSDARG00000044774 (directed) ENSDARG00000090183	false	directed	ENSDARG00000044774 (directed) ENSDARG00000090183	0.0428122	exact
zgc:163040	6.15476	pou5f3	directed	ENSDARG00000044774 (directed) ENSDARG00000090149	false	directed	ENSDARG00000044774 (directed) ENSDARG00000090149	0.0450239	exact
ENSDARG00000089963	2.08261	pou5f3	directed	ENSDARG00000044774 (directed) ENSDARG00000089963	false	directed	ENSDARG00000044774 (directed) ENSDARG00000089963	0.0535989	exact
si:dkey-108k21.11	4.04522	pou5f3	directed	ENSDARG00000044774 (directed) ENSDARG00000089719	false	directed	ENSDARG00000044774 (directed) ENSDARG00000089719	0.0572732	exact
trabd2a	1.76632	pou5f3	directed	ENSDARG00000044774 (directed) ENSDARG00000089701	false	directed	ENSDARG00000044774 (directed) ENSDARG00000089701	0.0462693	exact
bod1l1	1.70404	pou5f3	directed	ENSDARG00000044774 (directed) ENSDARG00000089505	false	directed	ENSDARG00000044774 (directed) ENSDARG00000089505	0.0678549	exact
si:ch211-168f7.5	1.42309	pou5f3	directed	ENSDARG00000044774 (directed) ENSDARG00000088195	false	directed	ENSDARG00000044774 (directed) ENSDARG00000088195	0.0543055	exact
zgc:112234	2.45187	pou5f3	directed	ENSDARG00000044774 (directed) ENSDARG00000087854	false	directed	ENSDARG00000044774 (directed) ENSDARG00000087854	0.0741303	exact
plekhn1	2.79915	pou5f3	directed	ENSDARG00000044774 (directed) ENSDARG00000087844	false	directed	ENSDARG00000044774 (directed) ENSDARG00000087844	0.0399293	exact
gfra3	4.06234	pou5f3	directed	ENSDARG00000044774 (directed) ENSDARG00000087704	false	directed	ENSDARG00000044774 (directed) ENSDARG00000087704	0.0180864	exact
zgc:85936	4.03889	pou5f3	directed	ENSDARG00000044774 (directed) ENSDARG00000087529	false	directed	ENSDARG00000044774 (directed) ENSDARG00000087529	0.0883135	exact
hbbe1.3	13.3834	pou5f3	directed	ENSDARG00000044774 (directed) ENSDARG00000087390	false	directed	ENSDARG00000044774 (directed) ENSDARG00000087390	0.0450773	exact
pik3c2b	1.46234	pou5f3	directed	ENSDARG00000044774 (directed) ENSDARG00000086927	false	directed	ENSDARG00000044774 (directed) ENSDARG00000086927	0.0844524	exact
gpr156	1.34091	pou5f3	directed	ENSDARG00000044774 (directed) ENSDARG00000086215	false	directed	ENSDARG00000044774 (directed) ENSDARG00000086215	0.0139275	exact
arhgap19	2.46158	pou5f3	directed	ENSDARG00000044774 (directed) ENSDARG00000083189	false	directed	ENSDARG00000044774 (directed) ENSDARG00000083189	0.0781315	exact
mir301b	1.37334	pou5f3	directed	ENSDARG00000044774 (directed) ENSDARG00000082169	false	directed	ENSDARG00000044774 (directed) ENSDARG00000082169	0.0449705	exact
pot1	2.68526	pou5f3	directed	ENSDARG00000044774 (directed) ENSDARG00000079915	false	directed	ENSDARG00000044774 (directed) ENSDARG00000079915	0.0713157	exact
man2c1	2.2623	pou5f3	directed	ENSDARG00000044774 (directed) ENSDARG00000079835	false	directed	ENSDARG00000044774 (directed) ENSDARG00000079835	0.0199598	exact
taf6l	2.11237	pou5f3	directed	ENSDARG00000044774 (directed) ENSDARG00000079684	false	directed	ENSDARG00000044774 (directed) ENSDARG00000079684	0.0306274	exact
pkn3	1.61026	pou5f3	directed	ENSDARG00000044774 (directed) ENSDARG00000079585	false	directed	ENSDARG00000044774 (directed) ENSDARG00000079585	0.0325404	exact
si:ch211-132p1.2	2.23095	pou5f3	directed	ENSDARG00000044774 (directed) ENSDARG00000079399	false	directed	ENSDARG00000044774 (directed) ENSDARG00000079399	0.0306623	exact
rfwd2	1.82976	pou5f3	directed	ENSDARG00000044774 (directed) ENSDARG00000079329	false	directed	ENSDARG00000044774 (directed) ENSDARG00000079329	0.0212808	exact
kmt2ca	1.2	pou5f3	directed	ENSDARG00000044774 (directed) ENSDARG00000079312	false	directed	ENSDARG00000044774 (directed) ENSDARG00000079312	0.0400803	exact
rlim	1.43182	pou5f3	directed	ENSDARG00000044774 (directed) ENSDARG00000079306	false	directed	ENSDARG00000044774 (directed) ENSDARG00000079306	0.0161188	exact
wnk1a	1.83248	pou5f3	directed	ENSDARG00000044774 (directed) ENSDARG00000078992	false	directed	ENSDARG00000044774 (directed) ENSDARG00000078992	0.0643412	exact
fam118b	1.8849	pou5f3	directed	ENSDARG00000044774 (directed) ENSDARG00000078983	false	directed	ENSDARG00000044774 (directed) ENSDARG00000078983	0.0249986	exact
brd4	1.75476	pou5f3	directed	ENSDARG00000044774 (directed) ENSDARG00000078904	false	directed	ENSDARG00000044774 (directed) ENSDARG00000078904	0.0517508	exact
supt20	1.38786	pou5f3	directed	ENSDARG00000044774 (directed) ENSDARG00000078658	false	directed	ENSDARG00000044774 (directed) ENSDARG00000078658	0.0437198	exact
tpx2	2.9718	pou5f3	directed	ENSDARG00000044774 (directed) ENSDARG00000078654	false	directed	ENSDARG00000044774 (directed) ENSDARG00000078654	0.103098	exact
arhgef9b	1.91825	pou5f3	directed	ENSDARG00000044774 (directed) ENSDARG00000078624	false	directed	ENSDARG00000044774 (directed) ENSDARG00000078624	0.0527083	exact
dap3	3.53168	pou5f3	directed	ENSDARG00000044774 (directed) ENSDARG00000078500	false	directed	ENSDARG00000044774 (directed) ENSDARG00000078500	0.022542	exact
oat	2.00952	pou5f3	directed	ENSDARG00000044774 (directed) ENSDARG00000078425	false	directed	ENSDARG00000044774 (directed) ENSDARG00000078425	0.0210688	exact
sec22a	3.3592	pou5f3	directed	ENSDARG00000044774 (directed) ENSDARG00000078328	false	directed	ENSDARG00000044774 (directed) ENSDARG00000078328	0.0196458	exact
cecr2	1.47763	pou5f3	directed	ENSDARG00000044774 (directed) ENSDARG00000078310	false	directed	ENSDARG00000044774 (directed) ENSDARG00000078310	0.0882901	exact
ENSDARG00000078191	3.34525	pou5f3	directed	ENSDARG00000044774 (directed) ENSDARG00000078191	false	directed	ENSDARG00000044774 (directed) ENSDARG00000078191	0.0339565	exact
kdm2ab	2.04359	pou5f3	directed	ENSDARG00000044774 (directed) ENSDARG00000078133	false	directed	ENSDARG00000044774 (directed) ENSDARG00000078133	0.0700125	exact
arhgef10	2.71378	pou5f3	directed	ENSDARG00000044774 (directed) ENSDARG00000077788	false	directed	ENSDARG00000044774 (directed) ENSDARG00000077788	0.0271135	exact
supv3l1	2.28099	pou5f3	directed	ENSDARG00000044774 (directed) ENSDARG00000077728	false	directed	ENSDARG00000044774 (directed) ENSDARG00000077728	0.0255941	exact
pign	3.92821	pou5f3	directed	ENSDARG00000044774 (directed) ENSDARG00000077532	false	directed	ENSDARG00000044774 (directed) ENSDARG00000077532	0.0475034	exact
ahctf1	2.21456	pou5f3	directed	ENSDARG00000044774 (directed) ENSDARG00000077530	false	directed	ENSDARG00000044774 (directed) ENSDARG00000077530	0.0959207	exact
rassf10a	1.15758	pou5f3	directed	ENSDARG00000044774 (directed) ENSDARG00000077424	false	directed	ENSDARG00000044774 (directed) ENSDARG00000077424	0.0136455	exact
tmem201	1.53182	pou5f3	directed	ENSDARG00000044774 (directed) ENSDARG00000077307	false	directed	ENSDARG00000044774 (directed) ENSDARG00000077307	0.0555415	exact
cep70	2.15476	pou5f3	directed	ENSDARG00000044774 (directed) ENSDARG00000076965	false	directed	ENSDARG00000044774 (directed) ENSDARG00000076965	0.0158481	exact
igdcc4	1.89194	pou5f3	directed	ENSDARG00000044774 (directed) ENSDARG00000076919	false	directed	ENSDARG00000044774 (directed) ENSDARG00000076919	0.0663517	exact
prkra	1.6841	pou5f3	directed	ENSDARG00000044774 (directed) ENSDARG00000076718	false	directed	ENSDARG00000044774 (directed) ENSDARG00000076718	0.0567692	exact
palb2	1.97937	pou5f3	directed	ENSDARG00000044774 (directed) ENSDARG00000076716	false	directed	ENSDARG00000044774 (directed) ENSDARG00000076716	0.0681988	exact
LOC108180085	1.82178	pou5f3	directed	ENSDARG00000044774 (directed) ENSDARG00000076609	false	directed	ENSDARG00000044774 (directed) ENSDARG00000076609	0.0180052	exact
dusp12	1.25882	pou5f3	directed	ENSDARG00000044774 (directed) ENSDARG00000076330	false	directed	ENSDARG00000044774 (directed) ENSDARG00000076330	0.0265627	exact
lmtk2	1.50311	pou5f3	directed	ENSDARG00000044774 (directed) ENSDARG00000076324	false	directed	ENSDARG00000044774 (directed) ENSDARG00000076324	0.0401326	exact
dlk2	2.25833	pou5f3	directed	ENSDARG00000044774 (directed) ENSDARG00000076247	false	directed	ENSDARG00000044774 (directed) ENSDARG00000076247	0.00925955	exact
si:ch73-36p18.3	2.09776	pou5f3	directed	ENSDARG00000044774 (directed) ENSDARG00000076129	false	directed	ENSDARG00000044774 (directed) ENSDARG00000076129	0.0673842	exact
zgc:173587	2.46611	pou5f3	directed	ENSDARG00000044774 (directed) ENSDARG00000075482	false	directed	ENSDARG00000044774 (directed) ENSDARG00000075482	0.0783145	exact
naa25	5.89372	pou5f3	directed	ENSDARG00000044774 (directed) ENSDARG00000075446	false	directed	ENSDARG00000044774 (directed) ENSDARG00000075446	0.0671001	exact
pttg1	1.92815	pou5f3	directed	ENSDARG00000044774 (directed) ENSDARG00000075421	false	directed	ENSDARG00000044774 (directed) ENSDARG00000075421	0.0123844	exact
espl1	1.93168	pou5f3	directed	ENSDARG00000044774 (directed) ENSDARG00000075354	false	directed	ENSDARG00000044774 (directed) ENSDARG00000075354	0.0551568	exact
chd7	1.46978	pou5f3	directed	ENSDARG00000044774 (directed) ENSDARG00000075211	false	directed	ENSDARG00000044774 (directed) ENSDARG00000075211	0.0734778	exact
dcaf17	1.75916	pou5f3	directed	ENSDARG00000044774 (directed) ENSDARG00000074909	false	directed	ENSDARG00000044774 (directed) ENSDARG00000074909	0.0158426	exact
rasip1	1.49432	pou5f3	directed	ENSDARG00000044774 (directed) ENSDARG00000074829	false	directed	ENSDARG00000044774 (directed) ENSDARG00000074829	0.0486405	exact
dbf4	3.68059	pou5f3	directed	ENSDARG00000044774 (directed) ENSDARG00000074796	false	directed	ENSDARG00000044774 (directed) ENSDARG00000074796	0.0567392	exact
ccar1	2.95225	pou5f3	directed	ENSDARG00000044774 (directed) ENSDARG00000074759	false	directed	ENSDARG00000044774 (directed) ENSDARG00000074759	0.0467112	exact
ENSDARG00000074645	1.54091	pou5f3	directed	ENSDARG00000044774 (directed) ENSDARG00000074645	false	directed	ENSDARG00000044774 (directed) ENSDARG00000074645	0.0521624	exact
si:ch211-198a12.6	1.7346	pou5f3	directed	ENSDARG00000044774 (directed) ENSDARG00000074624	false	directed	ENSDARG00000044774 (directed) ENSDARG00000074624	0.0743513	exact
gpr78a	1.4881	pou5f3	directed	ENSDARG00000044774 (directed) ENSDARG00000074600	false	directed	ENSDARG00000044774 (directed) ENSDARG00000074600	0.064436	exact
add2	8.33333	pou5f3	directed	ENSDARG00000044774 (directed) ENSDARG00000074581	false	directed	ENSDARG00000044774 (directed) ENSDARG00000074581	0.0608811	exact
ibtk	2.18159	pou5f3	directed	ENSDARG00000044774 (directed) ENSDARG00000074424	false	directed	ENSDARG00000044774 (directed) ENSDARG00000074424	0.0341768	exact
mcm8	1.79769	pou5f3	directed	ENSDARG00000044774 (directed) ENSDARG00000074326	false	directed	ENSDARG00000044774 (directed) ENSDARG00000074326	0.0574021	exact
flna	3.80758	pou5f3	directed	ENSDARG00000044774 (directed) ENSDARG00000074201	false	directed	ENSDARG00000044774 (directed) ENSDARG00000074201	0.0430723	exact
rbms1a	1.27143	pou5f3	directed	ENSDARG00000044774 (directed) ENSDARG00000074023	false	directed	ENSDARG00000044774 (directed) ENSDARG00000074023	0.0141316	exact
mctp2b	5.66944	pou5f3	directed	ENSDARG00000044774 (directed) ENSDARG00000073970	false	directed	ENSDARG00000044774 (directed) ENSDARG00000073970	0.0264348	exact
arhgef7b	1.90604	pou5f3	directed	ENSDARG00000044774 (directed) ENSDARG00000073848	false	directed	ENSDARG00000044774 (directed) ENSDARG00000073848	0.0201331	exact
ndc80	2.8171	pou5f3	directed	ENSDARG00000044774 (directed) ENSDARG00000071694	false	directed	ENSDARG00000044774 (directed) ENSDARG00000071694	0.0583237	exact
ppp1r3ca	2.22433	pou5f3	directed	ENSDARG00000044774 (directed) ENSDARG00000071005	false	directed	ENSDARG00000044774 (directed) ENSDARG00000071005	0.0237816	exact
si:dkey-85p17.3	1.81394	pou5f3	directed	ENSDARG00000044774 (directed) ENSDARG00000070601	false	directed	ENSDARG00000044774 (directed) ENSDARG00000070601	0.0625277	exact
si:ch211-113a14.28	2.99478	pou5f3	directed	ENSDARG00000044774 (directed) ENSDARG00000070297	false	directed	ENSDARG00000044774 (directed) ENSDARG00000070297	0.0730506	exact
casc5	5.32883	pou5f3	directed	ENSDARG00000044774 (directed) ENSDARG00000070239	false	directed	ENSDARG00000044774 (directed) ENSDARG00000070239	0.0960717	exact
aldh1l2	1.40202	pou5f3	directed	ENSDARG00000044774 (directed) ENSDARG00000070230	false	directed	ENSDARG00000044774 (directed) ENSDARG00000070230	0.078822	exact
nfyc	3.62897	pou5f3	directed	ENSDARG00000044774 (directed) ENSDARG00000070151	false	directed	ENSDARG00000044774 (directed) ENSDARG00000070151	0.0701612	exact
taf15	2.88654	pou5f3	directed	ENSDARG00000044774 (directed) ENSDARG00000070019	false	directed	ENSDARG00000044774 (directed) ENSDARG00000070019	0.0958015	exact
si:ch211-145b13.6	2.5119	pou5f3	directed	ENSDARG00000044774 (directed) ENSDARG00000069998	false	directed	ENSDARG00000044774 (directed) ENSDARG00000069998	0.0264134	exact
dpy19l1l	2.73453	pou5f3	directed	ENSDARG00000044774 (directed) ENSDARG00000069995	false	directed	ENSDARG00000044774 (directed) ENSDARG00000069995	0.0279007	exact
vegfc	1.3	pou5f3	directed	ENSDARG00000044774 (directed) ENSDARG00000069640	false	directed	ENSDARG00000044774 (directed) ENSDARG00000069640	0.0110899	exact
alox12	2.50476	pou5f3	directed	ENSDARG00000044774 (directed) ENSDARG00000069463	false	directed	ENSDARG00000044774 (directed) ENSDARG00000069463	0.0250299	exact
tsen15	2.32003	pou5f3	directed	ENSDARG00000044774 (directed) ENSDARG00000069280	false	directed	ENSDARG00000044774 (directed) ENSDARG00000069280	0.0617567	exact
zgc:162898	4.20952	pou5f3	directed	ENSDARG00000044774 (directed) ENSDARG00000069240	false	directed	ENSDARG00000044774 (directed) ENSDARG00000069240	0.00863926	exact
celsr1a	6.10595	pou5f3	directed	ENSDARG00000044774 (directed) ENSDARG00000069185	false	directed	ENSDARG00000044774 (directed) ENSDARG00000069185	0.0211643	exact
frmd7	4.34412	pou5f3	directed	ENSDARG00000044774 (directed) ENSDARG00000068958	false	directed	ENSDARG00000044774 (directed) ENSDARG00000068958	0.033564	exact
zgc:113983	2.70682	pou5f3	directed	ENSDARG00000044774 (directed) ENSDARG00000068941	false	directed	ENSDARG00000044774 (directed) ENSDARG00000068941	0.079077	exact
ENSDARG00000068400	1.93136	pou5f3	directed	ENSDARG00000044774 (directed) ENSDARG00000068400	false	directed	ENSDARG00000044774 (directed) ENSDARG00000068400	0.0228501	exact
ENSDARG00000068082	1.48168	pou5f3	directed	ENSDARG00000044774 (directed) ENSDARG00000068082	false	directed	ENSDARG00000044774 (directed) ENSDARG00000068082	0.0318769	exact
tgs1	2.08452	pou5f3	directed	ENSDARG00000044774 (directed) ENSDARG00000067916	false	directed	ENSDARG00000044774 (directed) ENSDARG00000067916	0.0262095	exact
antxr1c	1.58017	pou5f3	directed	ENSDARG00000044774 (directed) ENSDARG00000063612	false	directed	ENSDARG00000044774 (directed) ENSDARG00000063612	0.0513957	exact
rlf	1.87732	pou5f3	directed	ENSDARG00000044774 (directed) ENSDARG00000063553	false	directed	ENSDARG00000044774 (directed) ENSDARG00000063553	0.0516951	exact
isy1	1.50833	pou5f3	directed	ENSDARG00000044774 (directed) ENSDARG00000063466	false	directed	ENSDARG00000044774 (directed) ENSDARG00000063466	0.018441	exact
nup210	1.60278	pou5f3	directed	ENSDARG00000044774 (directed) ENSDARG00000063333	false	directed	ENSDARG00000044774 (directed) ENSDARG00000063333	0.0647018	exact
rc3h1b	1.79785	pou5f3	directed	ENSDARG00000044774 (directed) ENSDARG00000063182	false	directed	ENSDARG00000044774 (directed) ENSDARG00000063182	0.0293816	exact
ubn2a	1.38439	pou5f3	directed	ENSDARG00000044774 (directed) ENSDARG00000063062	false	directed	ENSDARG00000044774 (directed) ENSDARG00000063062	0.0645304	exact
tyw1	1.27143	pou5f3	directed	ENSDARG00000044774 (directed) ENSDARG00000062987	false	directed	ENSDARG00000044774 (directed) ENSDARG00000062987	0.0275728	exact
wasf3b	1.29293	pou5f3	directed	ENSDARG00000044774 (directed) ENSDARG00000062948	false	directed	ENSDARG00000044774 (directed) ENSDARG00000062948	0.0418256	exact
plekhg7	12.8301	pou5f3	directed	ENSDARG00000044774 (directed) ENSDARG00000062855	false	directed	ENSDARG00000044774 (directed) ENSDARG00000062855	0.0286064	exact
si:dkey-100n23.3	3.10285	pou5f3	directed	ENSDARG00000044774 (directed) ENSDARG00000062148	false	directed	ENSDARG00000044774 (directed) ENSDARG00000062148	0.0570667	exact
gmeb1	1.94551	pou5f3	directed	ENSDARG00000044774 (directed) ENSDARG00000062060	false	directed	ENSDARG00000044774 (directed) ENSDARG00000062060	0.083276	exact
rnf38	3.23294	pou5f3	directed	ENSDARG00000044774 (directed) ENSDARG00000062055	false	directed	ENSDARG00000044774 (directed) ENSDARG00000062055	0.0571051	exact
vrtn	2.05251	pou5f3	directed	ENSDARG00000044774 (directed) ENSDARG00000061963	false	directed	ENSDARG00000044774 (directed) ENSDARG00000061963	0.0330395	exact
ctdspl2a	1.87341	pou5f3	directed	ENSDARG00000044774 (directed) ENSDARG00000061587	false	directed	ENSDARG00000044774 (directed) ENSDARG00000061587	0.0346523	exact
rap1gap2a	3.69386	pou5f3	directed	ENSDARG00000044774 (directed) ENSDARG00000061551	false	directed	ENSDARG00000044774 (directed) ENSDARG00000061551	0.0544603	exact
u2surp	4.72698	pou5f3	directed	ENSDARG00000044774 (directed) ENSDARG00000061490	false	directed	ENSDARG00000044774 (directed) ENSDARG00000061490	0.0562012	exact
trip12	1.8669	pou5f3	directed	ENSDARG00000044774 (directed) ENSDARG00000061397	false	directed	ENSDARG00000044774 (directed) ENSDARG00000061397	0.0472954	exact
si:dkey-202e22.2	2.41026	pou5f3	directed	ENSDARG00000044774 (directed) ENSDARG00000061260	false	directed	ENSDARG00000044774 (directed) ENSDARG00000061260	0.04868	exact
nipblb	1.62626	pou5f3	directed	ENSDARG00000044774 (directed) ENSDARG00000061052	false	directed	ENSDARG00000044774 (directed) ENSDARG00000061052	0.0633611	exact
rabggta	1.39643	pou5f3	directed	ENSDARG00000044774 (directed) ENSDARG00000061024	false	directed	ENSDARG00000044774 (directed) ENSDARG00000061024	0.0232929	exact
polg	2.78566	pou5f3	directed	ENSDARG00000044774 (directed) ENSDARG00000060951	false	directed	ENSDARG00000044774 (directed) ENSDARG00000060951	0.0422057	exact
tmem229b	3.94167	pou5f3	directed	ENSDARG00000044774 (directed) ENSDARG00000060569	false	directed	ENSDARG00000044774 (directed) ENSDARG00000060569	0.0259622	exact
dcaf5	1.79924	pou5f3	directed	ENSDARG00000044774 (directed) ENSDARG00000060320	false	directed	ENSDARG00000044774 (directed) ENSDARG00000060320	0.0489621	exact
atp2c1	1.28382	pou5f3	directed	ENSDARG00000044774 (directed) ENSDARG00000060197	false	directed	ENSDARG00000044774 (directed) ENSDARG00000060197	0.0148245	exact
crb2a	1.65358	pou5f3	directed	ENSDARG00000044774 (directed) ENSDARG00000060106	false	directed	ENSDARG00000044774 (directed) ENSDARG00000060106	0.0360288	exact
terf1	2.60357	pou5f3	directed	ENSDARG00000044774 (directed) ENSDARG00000058710	false	directed	ENSDARG00000044774 (directed) ENSDARG00000058710	0.0372461	exact
alcamb	1.93734	pou5f3	directed	ENSDARG00000044774 (directed) ENSDARG00000058538	false	directed	ENSDARG00000044774 (directed) ENSDARG00000058538	0.0563276	exact
sephs1	2.94841	pou5f3	directed	ENSDARG00000044774 (directed) ENSDARG00000058292	false	directed	ENSDARG00000044774 (directed) ENSDARG00000058292	0.0347795	exact
hcfc2	2.77937	pou5f3	directed	ENSDARG00000044774 (directed) ENSDARG00000058127	false	directed	ENSDARG00000044774 (directed) ENSDARG00000058127	0.059744	exact
rprd2a	4.46472	pou5f3	directed	ENSDARG00000044774 (directed) ENSDARG00000058089	false	directed	ENSDARG00000044774 (directed) ENSDARG00000058089	0.0709688	exact
cep350	2.08889	pou5f3	directed	ENSDARG00000044774 (directed) ENSDARG00000058000	false	directed	ENSDARG00000044774 (directed) ENSDARG00000058000	0.0330448	exact
si:ch73-181d5.4	1.48095	pou5f3	directed	ENSDARG00000044774 (directed) ENSDARG00000057907	false	directed	ENSDARG00000044774 (directed) ENSDARG00000057907	0.0644173	exact
dnmt3bb.2	1.26074	pou5f3	directed	ENSDARG00000044774 (directed) ENSDARG00000057830	false	directed	ENSDARG00000044774 (directed) ENSDARG00000057830	0.0563576	exact
si:ch73-61d6.3	1.50132	pou5f3	directed	ENSDARG00000044774 (directed) ENSDARG00000057826	false	directed	ENSDARG00000044774 (directed) ENSDARG00000057826	0.0336016	exact
hells	1.66111	pou5f3	directed	ENSDARG00000044774 (directed) ENSDARG00000057738	false	directed	ENSDARG00000044774 (directed) ENSDARG00000057738	0.0836593	exact
chtopa	3.79958	pou5f3	directed	ENSDARG00000044774 (directed) ENSDARG00000057234	false	directed	ENSDARG00000044774 (directed) ENSDARG00000057234	0.0537365	exact
pcolcea	4.44206	pou5f3	directed	ENSDARG00000044774 (directed) ENSDARG00000056913	false	directed	ENSDARG00000044774 (directed) ENSDARG00000056913	0.0103643	exact
tbccd1	2.31238	pou5f3	directed	ENSDARG00000044774 (directed) ENSDARG00000056886	false	directed	ENSDARG00000044774 (directed) ENSDARG00000056886	0.0389417	exact
si:dkey-27c15.3	3.04436	pou5f3	directed	ENSDARG00000044774 (directed) ENSDARG00000056847	false	directed	ENSDARG00000044774 (directed) ENSDARG00000056847	0.0538166	exact
tmem170a	2.11225	pou5f3	directed	ENSDARG00000044774 (directed) ENSDARG00000056628	false	directed	ENSDARG00000044774 (directed) ENSDARG00000056628	0.0259487	exact
her9	2.48123	pou5f3	directed	ENSDARG00000044774 (directed) ENSDARG00000056438	false	directed	ENSDARG00000044774 (directed) ENSDARG00000056438	0.0184266	exact
cdc27	1.921	pou5f3	directed	ENSDARG00000044774 (directed) ENSDARG00000056258	false	directed	ENSDARG00000044774 (directed) ENSDARG00000056258	0.0545171	exact
ptger3	2.18474	pou5f3	directed	ENSDARG00000044774 (directed) ENSDARG00000055781	false	directed	ENSDARG00000044774 (directed) ENSDARG00000055781	0.0454477	exact
suv39h1b	1.71726	pou5f3	directed	ENSDARG00000044774 (directed) ENSDARG00000055753	false	directed	ENSDARG00000044774 (directed) ENSDARG00000055753	0.0864118	exact
akap12b	2.10952	pou5f3	directed	ENSDARG00000044774 (directed) ENSDARG00000055678	false	directed	ENSDARG00000044774 (directed) ENSDARG00000055678	0.0594501	exact
zcchc7	2.62266	pou5f3	directed	ENSDARG00000044774 (directed) ENSDARG00000055443	false	directed	ENSDARG00000044774 (directed) ENSDARG00000055443	0.0461406	exact
si:dkey-67c22.2	2.49045	pou5f3	directed	ENSDARG00000044774 (directed) ENSDARG00000055389	false	directed	ENSDARG00000044774 (directed) ENSDARG00000055389	0.0355996	exact
sema3fb	2.30834	pou5f3	directed	ENSDARG00000044774 (directed) ENSDARG00000055373	false	directed	ENSDARG00000044774 (directed) ENSDARG00000055373	0.0249348	exact
si:ch73-1a9.4	1.53168	pou5f3	directed	ENSDARG00000044774 (directed) ENSDARG00000055339	false	directed	ENSDARG00000044774 (directed) ENSDARG00000055339	0.0255105	exact
ggnbp2	4.88135	pou5f3	directed	ENSDARG00000044774 (directed) ENSDARG00000055086	false	directed	ENSDARG00000044774 (directed) ENSDARG00000055086	0.024184	exact
nxf1	1.58446	pou5f3	directed	ENSDARG00000044774 (directed) ENSDARG00000055076	false	directed	ENSDARG00000044774 (directed) ENSDARG00000055076	0.068094	exact
araf	3.47305	pou5f3	directed	ENSDARG00000044774 (directed) ENSDARG00000054533	false	directed	ENSDARG00000044774 (directed) ENSDARG00000054533	0.029859	exact
ssuh2.2	3.675	pou5f3	directed	ENSDARG00000044774 (directed) ENSDARG00000054418	false	directed	ENSDARG00000044774 (directed) ENSDARG00000054418	0.0552239	exact
sfi1	1.97104	pou5f3	directed	ENSDARG00000044774 (directed) ENSDARG00000053992	false	directed	ENSDARG00000044774 (directed) ENSDARG00000053992	0.100522	exact
med13a	1.86587	pou5f3	directed	ENSDARG00000044774 (directed) ENSDARG00000053884	false	directed	ENSDARG00000044774 (directed) ENSDARG00000053884	0.0655761	exact
hnrnpc	2.51531	pou5f3	directed	ENSDARG00000044774 (directed) ENSDARG00000053810	false	directed	ENSDARG00000044774 (directed) ENSDARG00000053810	0.0473943	exact
ccdc88c	2.66151	pou5f3	directed	ENSDARG00000044774 (directed) ENSDARG00000053713	false	directed	ENSDARG00000044774 (directed) ENSDARG00000053713	0.040429	exact
gdf6a	3.35589	pou5f3	directed	ENSDARG00000044774 (directed) ENSDARG00000053479	false	directed	ENSDARG00000044774 (directed) ENSDARG00000053479	0.0366851	exact
gtpbp1	1	pou5f3	directed	ENSDARG00000044774 (directed) ENSDARG00000053467	false	directed	ENSDARG00000044774 (directed) ENSDARG00000053467	0.0522642	exact
tubb1	2.45579	pou5f3	directed	ENSDARG00000044774 (directed) ENSDARG00000053066	false	directed	ENSDARG00000044774 (directed) ENSDARG00000053066	0.0612438	exact
cenpi	4.34646	pou5f3	directed	ENSDARG00000044774 (directed) ENSDARG00000052565	false	directed	ENSDARG00000044774 (directed) ENSDARG00000052565	0.0722182	exact
lig3	2.69607	pou5f3	directed	ENSDARG00000044774 (directed) ENSDARG00000052553	false	directed	ENSDARG00000044774 (directed) ENSDARG00000052553	0.0578411	exact
tia1	1.3	pou5f3	directed	ENSDARG00000044774 (directed) ENSDARG00000052536	false	directed	ENSDARG00000044774 (directed) ENSDARG00000052536	0.0380198	exact
dusp10	1.70519	pou5f3	directed	ENSDARG00000044774 (directed) ENSDARG00000052465	false	directed	ENSDARG00000044774 (directed) ENSDARG00000052465	0.00730169	exact
smarca5	2.20781	pou5f3	directed	ENSDARG00000044774 (directed) ENSDARG00000052348	false	directed	ENSDARG00000044774 (directed) ENSDARG00000052348	0.0798557	exact
notch1b	2.8345	pou5f3	directed	ENSDARG00000044774 (directed) ENSDARG00000052094	false	directed	ENSDARG00000044774 (directed) ENSDARG00000052094	0.0603517	exact
zgc:173552	4.35635	pou5f3	directed	ENSDARG00000044774 (directed) ENSDARG00000051737	false	directed	ENSDARG00000044774 (directed) ENSDARG00000051737	0.0947016	exact
si:dkey-108k21.27	3.11619	pou5f3	directed	ENSDARG00000044774 (directed) ENSDARG00000051726	false	directed	ENSDARG00000044774 (directed) ENSDARG00000051726	0.0644787	exact
zgc:162634	4.71429	pou5f3	directed	ENSDARG00000044774 (directed) ENSDARG00000045773	false	directed	ENSDARG00000044774 (directed) ENSDARG00000045773	0.00941069	exact
usp3	2.03456	pou5f3	directed	ENSDARG00000044774 (directed) ENSDARG00000045641	false	directed	ENSDARG00000044774 (directed) ENSDARG00000045641	0.0710347	exact
pawr	1.43182	pou5f3	directed	ENSDARG00000044774 (directed) ENSDARG00000045486	false	directed	ENSDARG00000044774 (directed) ENSDARG00000045486	0.00924975	exact
mllt10	2.27698	pou5f3	directed	ENSDARG00000044774 (directed) ENSDARG00000045401	false	directed	ENSDARG00000044774 (directed) ENSDARG00000045401	0.0713755	exact
lcmt1	6.29722	pou5f3	directed	ENSDARG00000044774 (directed) ENSDARG00000045140	false	directed	ENSDARG00000044774 (directed) ENSDARG00000045140	0.0116976	exact
vsg1	1.95662	pou5f3	directed	ENSDARG00000044774 (directed) ENSDARG00000045003	false	directed	ENSDARG00000044774 (directed) ENSDARG00000045003	0.0291514	exact
dhrs3b	1.27692	pou5f3	directed	ENSDARG00000044774 (directed) ENSDARG00000044803	false	directed	ENSDARG00000044774 (directed) ENSDARG00000044803	0.0150765	exact
tex261	2.22864	pou5f3	directed	ENSDARG00000044774 (directed) ENSDARG00000044584	false	directed	ENSDARG00000044774 (directed) ENSDARG00000044584	0.0191744	exact
hif1al2	3.85724	pou5f3	directed	ENSDARG00000044774 (directed) ENSDARG00000044550	false	directed	ENSDARG00000044774 (directed) ENSDARG00000044550	0.0530789	exact
pak1ip1	2.491	pou5f3	directed	ENSDARG00000044774 (directed) ENSDARG00000044488	false	directed	ENSDARG00000044774 (directed) ENSDARG00000044488	0.0298169	exact
zmpste24	3.25952	pou5f3	directed	ENSDARG00000044774 (directed) ENSDARG00000044090	false	directed	ENSDARG00000044774 (directed) ENSDARG00000044090	0.0434802	exact
cldn5a	1.72804	pou5f3	directed	ENSDARG00000044774 (directed) ENSDARG00000043716	false	directed	ENSDARG00000044774 (directed) ENSDARG00000043716	0.0503592	exact
si:dkey-86e18.1	1.26667	pou5f3	directed	ENSDARG00000044774 (directed) ENSDARG00000043536	false	directed	ENSDARG00000044774 (directed) ENSDARG00000043536	0.0133361	exact
gtf3c3	6.08095	pou5f3	directed	ENSDARG00000044774 (directed) ENSDARG00000043247	false	directed	ENSDARG00000044774 (directed) ENSDARG00000043247	0.0171939	exact
blf	1.43182	pou5f3	directed	ENSDARG00000044774 (directed) ENSDARG00000043126	false	directed	ENSDARG00000044774 (directed) ENSDARG00000043126	0.062161	exact
dym	2.37424	pou5f3	directed	ENSDARG00000044774 (directed) ENSDARG00000042555	false	directed	ENSDARG00000044774 (directed) ENSDARG00000042555	0.0391638	exact
nup205	1.88862	pou5f3	directed	ENSDARG00000044774 (directed) ENSDARG00000042530	false	directed	ENSDARG00000044774 (directed) ENSDARG00000042530	0.0700628	exact
tlk1a	4.63016	pou5f3	directed	ENSDARG00000044774 (directed) ENSDARG00000042467	false	directed	ENSDARG00000044774 (directed) ENSDARG00000042467	0.0645502	exact
lpar2a	3.51317	pou5f3	directed	ENSDARG00000044774 (directed) ENSDARG00000042338	false	directed	ENSDARG00000044774 (directed) ENSDARG00000042338	0.0264738	exact
si:dkeyp-118h3.6	2.20232	pou5f3	directed	ENSDARG00000044774 (directed) ENSDARG00000042025	false	directed	ENSDARG00000044774 (directed) ENSDARG00000042025	0.0209104	exact
zc3h14	2.09658	pou5f3	directed	ENSDARG00000044774 (directed) ENSDARG00000041402	false	directed	ENSDARG00000044774 (directed) ENSDARG00000041402	0.0159966	exact
wdr20	6.23026	pou5f3	directed	ENSDARG00000044774 (directed) ENSDARG00000041239	false	directed	ENSDARG00000044774 (directed) ENSDARG00000041239	0.0261911	exact
mier1a	4.39405	pou5f3	directed	ENSDARG00000044774 (directed) ENSDARG00000041072	false	directed	ENSDARG00000044774 (directed) ENSDARG00000041072	0.0613417	exact
piga	2.13585	pou5f3	directed	ENSDARG00000044774 (directed) ENSDARG00000041040	false	directed	ENSDARG00000044774 (directed) ENSDARG00000041040	0.0265255	exact
zgc:114130	2.73788	pou5f3	directed	ENSDARG00000044774 (directed) ENSDARG00000040725	false	directed	ENSDARG00000044774 (directed) ENSDARG00000040725	0.0617358	exact
cuedc2	6.00718	pou5f3	directed	ENSDARG00000044774 (directed) ENSDARG00000039365	false	directed	ENSDARG00000044774 (directed) ENSDARG00000039365	0.0347491	exact
vps13a	1.36026	pou5f3	directed	ENSDARG00000044774 (directed) ENSDARG00000039225	false	directed	ENSDARG00000044774 (directed) ENSDARG00000039225	0.0419877	exact
fbxo5	4.96667	pou5f3	directed	ENSDARG00000044774 (directed) ENSDARG00000039020	false	directed	ENSDARG00000044774 (directed) ENSDARG00000039020	0.0757323	exact
gins3	2.11554	pou5f3	directed	ENSDARG00000044774 (directed) ENSDARG00000038847	false	directed	ENSDARG00000044774 (directed) ENSDARG00000038847	0.0413941	exact
cenpl	2.96035	pou5f3	directed	ENSDARG00000044774 (directed) ENSDARG00000038802	false	directed	ENSDARG00000044774 (directed) ENSDARG00000038802	0.0227165	exact
elavl1	1.43168	pou5f3	directed	ENSDARG00000044774 (directed) ENSDARG00000038695	false	directed	ENSDARG00000044774 (directed) ENSDARG00000038695	0.0559848	exact
b3gnt7	2.27345	pou5f3	directed	ENSDARG00000044774 (directed) ENSDARG00000038489	false	directed	ENSDARG00000044774 (directed) ENSDARG00000038489	0.0275329	exact
vgll3	1.425	pou5f3	directed	ENSDARG00000044774 (directed) ENSDARG00000038305	false	directed	ENSDARG00000044774 (directed) ENSDARG00000038305	0.0288086	exact
gdf3	2.12382	pou5f3	directed	ENSDARG00000044774 (directed) ENSDARG00000037995	false	directed	ENSDARG00000044774 (directed) ENSDARG00000037995	0.0404549	exact
thoc6	3.20516	pou5f3	directed	ENSDARG00000044774 (directed) ENSDARG00000037966	false	directed	ENSDARG00000044774 (directed) ENSDARG00000037966	0.0256223	exact
thoc2	3.37335	pou5f3	directed	ENSDARG00000044774 (directed) ENSDARG00000037503	false	directed	ENSDARG00000044774 (directed) ENSDARG00000037503	0.0945981	exact
slc43a1a	1.40202	pou5f3	directed	ENSDARG00000044774 (directed) ENSDARG00000037393	false	directed	ENSDARG00000044774 (directed) ENSDARG00000037393	0.0600362	exact
frs2b	4.57738	pou5f3	directed	ENSDARG00000044774 (directed) ENSDARG00000037353	false	directed	ENSDARG00000044774 (directed) ENSDARG00000037353	0.0446373	exact
wdr92	3.79286	pou5f3	directed	ENSDARG00000044774 (directed) ENSDARG00000037334	false	directed	ENSDARG00000044774 (directed) ENSDARG00000037334	0.0217274	exact
tpbgb	1.85743	pou5f3	directed	ENSDARG00000044774 (directed) ENSDARG00000037186	false	directed	ENSDARG00000044774 (directed) ENSDARG00000037186	0.0181891	exact
zc3h13	2.06988	pou5f3	directed	ENSDARG00000044774 (directed) ENSDARG00000037177	false	directed	ENSDARG00000044774 (directed) ENSDARG00000037177	0.0495056	exact
ube4b	1.29091	pou5f3	directed	ENSDARG00000044774 (directed) ENSDARG00000037017	false	directed	ENSDARG00000044774 (directed) ENSDARG00000037017	0.0271913	exact
asxl1	9.94286	pou5f3	directed	ENSDARG00000044774 (directed) ENSDARG00000036956	false	directed	ENSDARG00000044774 (directed) ENSDARG00000036956	0.0700242	exact
dolpp1	2.21573	pou5f3	directed	ENSDARG00000044774 (directed) ENSDARG00000036915	false	directed	ENSDARG00000044774 (directed) ENSDARG00000036915	0.0254906	exact
dock6	1.89563	pou5f3	directed	ENSDARG00000044774 (directed) ENSDARG00000035706	false	directed	ENSDARG00000044774 (directed) ENSDARG00000035706	0.0784376	exact
zgc:101664	2.03021	pou5f3	directed	ENSDARG00000044774 (directed) ENSDARG00000035700	false	directed	ENSDARG00000044774 (directed) ENSDARG00000035700	0.0457212	exact
si:ch211-193k19.1	1.28333	pou5f3	directed	ENSDARG00000044774 (directed) ENSDARG00000035660	false	directed	ENSDARG00000044774 (directed) ENSDARG00000035660	0.0352149	exact
pgam5	3.8667	pou5f3	directed	ENSDARG00000044774 (directed) ENSDARG00000035608	false	directed	ENSDARG00000044774 (directed) ENSDARG00000035608	0.0196813	exact
ankle2	1.48254	pou5f3	directed	ENSDARG00000044774 (directed) ENSDARG00000035607	false	directed	ENSDARG00000044774 (directed) ENSDARG00000035607	0.0717406	exact
srsf7a	1.77424	pou5f3	directed	ENSDARG00000044774 (directed) ENSDARG00000035325	false	directed	ENSDARG00000044774 (directed) ENSDARG00000035325	0.0535449	exact
unc119a	1.34091	pou5f3	directed	ENSDARG00000044774 (directed) ENSDARG00000034453	false	directed	ENSDARG00000044774 (directed) ENSDARG00000034453	0.0371021	exact
hist1h2ba	6.1096	pou5f3	directed	ENSDARG00000044774 (directed) ENSDARG00000034203	false	directed	ENSDARG00000044774 (directed) ENSDARG00000034203	0.0693832	exact
csnk1g2b	2.05352	pou5f3	directed	ENSDARG00000044774 (directed) ENSDARG00000034056	false	directed	ENSDARG00000044774 (directed) ENSDARG00000034056	0.0235423	exact
tango6	4.98571	pou5f3	directed	ENSDARG00000044774 (directed) ENSDARG00000034001	false	directed	ENSDARG00000044774 (directed) ENSDARG00000034001	0.037543	exact
kif7	2.66899	pou5f3	directed	ENSDARG00000044774 (directed) ENSDARG00000033099	false	directed	ENSDARG00000044774 (directed) ENSDARG00000033099	0.017208	exact
dtx2	1.34091	pou5f3	directed	ENSDARG00000044774 (directed) ENSDARG00000032933	false	directed	ENSDARG00000044774 (directed) ENSDARG00000032933	0.0633205	exact
epb41l5	1.61786	pou5f3	directed	ENSDARG00000044774 (directed) ENSDARG00000032324	false	directed	ENSDARG00000044774 (directed) ENSDARG00000032324	0.0349236	exact
tbx1	631.406	pou5f3	directed	ENSDARG00000044774 (directed) ENSDARG00000031891	false	directed	ENSDARG00000044774 (directed) ENSDARG00000031891	0.0425225	exact
ercc1	2.49607	pou5f3	directed	ENSDARG00000044774 (directed) ENSDARG00000031680	false	directed	ENSDARG00000044774 (directed) ENSDARG00000031680	0.0558249	exact
melk	1.43182	pou5f3	directed	ENSDARG00000044774 (directed) ENSDARG00000030759	false	directed	ENSDARG00000044774 (directed) ENSDARG00000030759	0.0556608	exact
lrrc42	2.81869	pou5f3	directed	ENSDARG00000044774 (directed) ENSDARG00000030591	false	directed	ENSDARG00000044774 (directed) ENSDARG00000030591	0.0459044	exact
epb41b	1.725	pou5f3	directed	ENSDARG00000044774 (directed) ENSDARG00000029019	false	directed	ENSDARG00000044774 (directed) ENSDARG00000029019	0.0739373	exact
hmga1a	1.29293	pou5f3	directed	ENSDARG00000044774 (directed) ENSDARG00000028335	false	directed	ENSDARG00000044774 (directed) ENSDARG00000028335	0.0923371	exact
nus1	1.69369	pou5f3	directed	ENSDARG00000044774 (directed) ENSDARG00000027813	false	directed	ENSDARG00000044774 (directed) ENSDARG00000027813	0.020106	exact
rexo1	1.44643	pou5f3	directed	ENSDARG00000044774 (directed) ENSDARG00000026986	false	directed	ENSDARG00000044774 (directed) ENSDARG00000026986	0.0333144	exact
acin1b	1.64444	pou5f3	directed	ENSDARG00000044774 (directed) ENSDARG00000026842	false	directed	ENSDARG00000044774 (directed) ENSDARG00000026842	0.0324321	exact
gmds	2.88059	pou5f3	directed	ENSDARG00000044774 (directed) ENSDARG00000026629	false	directed	ENSDARG00000044774 (directed) ENSDARG00000026629	0.0142012	exact
arhgap29a	1.48648	pou5f3	directed	ENSDARG00000044774 (directed) ENSDARG00000026329	false	directed	ENSDARG00000044774 (directed) ENSDARG00000026329	0.0265679	exact
ube3d	5.45516	pou5f3	directed	ENSDARG00000044774 (directed) ENSDARG00000026178	false	directed	ENSDARG00000044774 (directed) ENSDARG00000026178	0.0127762	exact
cpsf3l	2.07092	pou5f3	directed	ENSDARG00000044774 (directed) ENSDARG00000025212	false	directed	ENSDARG00000044774 (directed) ENSDARG00000025212	0.0386891	exact
stil	9.90238	pou5f3	directed	ENSDARG00000044774 (directed) ENSDARG00000024904	false	directed	ENSDARG00000044774 (directed) ENSDARG00000024904	0.0755698	exact
zgc:56106	1.88991	pou5f3	directed	ENSDARG00000044774 (directed) ENSDARG00000022564	false	directed	ENSDARG00000044774 (directed) ENSDARG00000022564	0.0276538	exact
ppp1r8b	2.0842	pou5f3	directed	ENSDARG00000044774 (directed) ENSDARG00000022430	false	directed	ENSDARG00000044774 (directed) ENSDARG00000022430	0.0514756	exact
ntmt1	1.2	pou5f3	directed	ENSDARG00000044774 (directed) ENSDARG00000022399	false	directed	ENSDARG00000044774 (directed) ENSDARG00000022399	0.0292975	exact
si:dkey-256h2.1	1.82049	pou5f3	directed	ENSDARG00000044774 (directed) ENSDARG00000021849	false	directed	ENSDARG00000044774 (directed) ENSDARG00000021849	0.0315469	exact
ENSDARG00000021611	1.80321	pou5f3	directed	ENSDARG00000044774 (directed) ENSDARG00000021611	false	directed	ENSDARG00000044774 (directed) ENSDARG00000021611	0.0313853	exact
emc3	7.09756	pou5f3	directed	ENSDARG00000044774 (directed) ENSDARG00000020607	false	directed	ENSDARG00000044774 (directed) ENSDARG00000020607	0.0187242	exact
ewsr1b	5.91988	pou5f3	directed	ENSDARG00000044774 (directed) ENSDARG00000020465	false	directed	ENSDARG00000044774 (directed) ENSDARG00000020465	0.0741326	exact
edrf1	1.68033	pou5f3	directed	ENSDARG00000044774 (directed) ENSDARG00000019834	false	directed	ENSDARG00000044774 (directed) ENSDARG00000019834	0.0158834	exact
nfe2l3	2.61888	pou5f3	directed	ENSDARG00000044774 (directed) ENSDARG00000019810	false	directed	ENSDARG00000044774 (directed) ENSDARG00000019810	0.0501034	exact
parp1	29.1175	pou5f3	directed	ENSDARG00000044774 (directed) ENSDARG00000019529	false	directed	ENSDARG00000044774 (directed) ENSDARG00000019529	0.0920051	exact
fbxo30b	2.42738	pou5f3	directed	ENSDARG00000044774 (directed) ENSDARG00000019311	false	directed	ENSDARG00000044774 (directed) ENSDARG00000019311	0.0106443	exact
tfdp1a	1.56991	pou5f3	directed	ENSDARG00000044774 (directed) ENSDARG00000019293	false	directed	ENSDARG00000044774 (directed) ENSDARG00000019293	0.0343076	exact
zbtb39	2.08576	pou5f3	directed	ENSDARG00000044774 (directed) ENSDARG00000019265	false	directed	ENSDARG00000044774 (directed) ENSDARG00000019265	0.0530558	exact
cul1a	3.45117	pou5f3	directed	ENSDARG00000044774 (directed) ENSDARG00000019239	false	directed	ENSDARG00000044774 (directed) ENSDARG00000019239	0.0524462	exact
tmem39b	2.90516	pou5f3	directed	ENSDARG00000044774 (directed) ENSDARG00000018956	false	directed	ENSDARG00000044774 (directed) ENSDARG00000018956	0.0142452	exact
rad17	2.23898	pou5f3	directed	ENSDARG00000044774 (directed) ENSDARG00000018918	false	directed	ENSDARG00000044774 (directed) ENSDARG00000018918	0.0443534	exact
kdm4aa	1.68874	pou5f3	directed	ENSDARG00000044774 (directed) ENSDARG00000018782	false	directed	ENSDARG00000044774 (directed) ENSDARG00000018782	0.0203346	exact
carm1	1.642	pou5f3	directed	ENSDARG00000044774 (directed) ENSDARG00000018698	false	directed	ENSDARG00000044774 (directed) ENSDARG00000018698	0.042791	exact
rad54l	2.81591	pou5f3	directed	ENSDARG00000044774 (directed) ENSDARG00000018623	false	directed	ENSDARG00000044774 (directed) ENSDARG00000018623	0.0613058	exact
ddx61	2.18254	pou5f3	directed	ENSDARG00000044774 (directed) ENSDARG00000018425	false	directed	ENSDARG00000044774 (directed) ENSDARG00000018425	0.0843198	exact
arglu1b	1.3	pou5f3	directed	ENSDARG00000044774 (directed) ENSDARG00000018319	false	directed	ENSDARG00000044774 (directed) ENSDARG00000018319	0.0526498	exact
cenpj	1.68452	pou5f3	directed	ENSDARG00000044774 (directed) ENSDARG00000018121	false	directed	ENSDARG00000044774 (directed) ENSDARG00000018121	0.0451165	exact
vrk1	2.85833	pou5f3	directed	ENSDARG00000044774 (directed) ENSDARG00000018006	false	directed	ENSDARG00000044774 (directed) ENSDARG00000018006	0.0253752	exact
ccdc6b	1.62273	pou5f3	directed	ENSDARG00000044774 (directed) ENSDARG00000017595	false	directed	ENSDARG00000044774 (directed) ENSDARG00000017595	0.045149	exact
epha2a	1.46984	pou5f3	directed	ENSDARG00000044774 (directed) ENSDARG00000017354	false	directed	ENSDARG00000044774 (directed) ENSDARG00000017354	0.0580125	exact
gpsm2	2.49646	pou5f3	directed	ENSDARG00000044774 (directed) ENSDARG00000017311	false	directed	ENSDARG00000044774 (directed) ENSDARG00000017311	0.026743	exact
zgc:152891	3.57619	pou5f3	directed	ENSDARG00000044774 (directed) ENSDARG00000016789	false	directed	ENSDARG00000044774 (directed) ENSDARG00000016789	0.010145	exact
huwe1	2.3768	pou5f3	directed	ENSDARG00000044774 (directed) ENSDARG00000016782	false	directed	ENSDARG00000044774 (directed) ENSDARG00000016782	0.0742828	exact
tprb	1.90051	pou5f3	directed	ENSDARG00000044774 (directed) ENSDARG00000016630	false	directed	ENSDARG00000044774 (directed) ENSDARG00000016630	0.0771539	exact
klhl4	3.86154	pou5f3	directed	ENSDARG00000044774 (directed) ENSDARG00000016531	false	directed	ENSDARG00000044774 (directed) ENSDARG00000016531	0.053575	exact
gtf2h2	3.68813	pou5f3	directed	ENSDARG00000044774 (directed) ENSDARG00000016514	false	directed	ENSDARG00000044774 (directed) ENSDARG00000016514	0.0522724	exact
ENSDARG00000016212	3.42253	pou5f3	directed	ENSDARG00000044774 (directed) ENSDARG00000016212	false	directed	ENSDARG00000044774 (directed) ENSDARG00000016212	0.0705737	exact
nup107	4.27894	pou5f3	directed	ENSDARG00000044774 (directed) ENSDARG00000016010	false	directed	ENSDARG00000044774 (directed) ENSDARG00000016010	0.0460619	exact
smcr8b	1.26667	pou5f3	directed	ENSDARG00000044774 (directed) ENSDARG00000015803	false	directed	ENSDARG00000044774 (directed) ENSDARG00000015803	0.0219665	exact
racgap1	2.29842	pou5f3	directed	ENSDARG00000044774 (directed) ENSDARG00000015460	false	directed	ENSDARG00000044774 (directed) ENSDARG00000015460	0.0681122	exact
hdac1	2.61234	pou5f3	directed	ENSDARG00000044774 (directed) ENSDARG00000015427	false	directed	ENSDARG00000044774 (directed) ENSDARG00000015427	0.0609473	exact
ube2g1a	2.1421	pou5f3	directed	ENSDARG00000044774 (directed) ENSDARG00000015292	false	directed	ENSDARG00000044774 (directed) ENSDARG00000015292	0.0355855	exact
st3gal3b	1.27692	pou5f3	directed	ENSDARG00000044774 (directed) ENSDARG00000015252	false	directed	ENSDARG00000044774 (directed) ENSDARG00000015252	0.0576316	exact
pola2	1.38333	pou5f3	directed	ENSDARG00000044774 (directed) ENSDARG00000015070	false	directed	ENSDARG00000044774 (directed) ENSDARG00000015070	0.0414556	exact
nutf2l	2.29369	pou5f3	directed	ENSDARG00000044774 (directed) ENSDARG00000014499	false	directed	ENSDARG00000044774 (directed) ENSDARG00000014499	0.00852965	exact
cldn5b	2.39498	pou5f3	directed	ENSDARG00000044774 (directed) ENSDARG00000014059	false	directed	ENSDARG00000044774 (directed) ENSDARG00000014059	0.0500596	exact
rrm1	1.96237	pou5f3	directed	ENSDARG00000044774 (directed) ENSDARG00000014017	false	directed	ENSDARG00000044774 (directed) ENSDARG00000014017	0.0552026	exact
mcm9	1.48535	pou5f3	directed	ENSDARG00000044774 (directed) ENSDARG00000013528	false	directed	ENSDARG00000044774 (directed) ENSDARG00000013528	0.0707678	exact
hira	22.5494	pou5f3	directed	ENSDARG00000044774 (directed) ENSDARG00000013434	false	directed	ENSDARG00000044774 (directed) ENSDARG00000013434	0.0959971	exact
znf76	1.58696	pou5f3	directed	ENSDARG00000044774 (directed) ENSDARG00000013279	false	directed	ENSDARG00000044774 (directed) ENSDARG00000013279	0.01949	exact
wbp1la	1.62345	pou5f3	directed	ENSDARG00000044774 (directed) ENSDARG00000013245	false	directed	ENSDARG00000044774 (directed) ENSDARG00000013245	0.0081412	exact
tubgcp2	3.73954	pou5f3	directed	ENSDARG00000044774 (directed) ENSDARG00000013079	false	directed	ENSDARG00000044774 (directed) ENSDARG00000013079	0.0217506	exact
ints6	6.33413	pou5f3	directed	ENSDARG00000044774 (directed) ENSDARG00000013025	false	directed	ENSDARG00000044774 (directed) ENSDARG00000013025	0.0583789	exact
eif2d	2.08003	pou5f3	directed	ENSDARG00000044774 (directed) ENSDARG00000012929	false	directed	ENSDARG00000044774 (directed) ENSDARG00000012929	0.0278763	exact
csnk2a2a	1.74485	pou5f3	directed	ENSDARG00000044774 (directed) ENSDARG00000012818	false	directed	ENSDARG00000044774 (directed) ENSDARG00000012818	0.0306764	exact
atf6	742.783	pou5f3	directed	ENSDARG00000044774 (directed) ENSDARG00000012656	false	directed	ENSDARG00000044774 (directed) ENSDARG00000012656	0.0117956	exact
hcfc1b	2.0548	pou5f3	directed	ENSDARG00000044774 (directed) ENSDARG00000012519	false	directed	ENSDARG00000044774 (directed) ENSDARG00000012519	0.0608302	exact
adssl	1.58445	pou5f3	directed	ENSDARG00000044774 (directed) ENSDARG00000012399	false	directed	ENSDARG00000044774 (directed) ENSDARG00000012399	0.0379455	exact
adar	2.0974	pou5f3	directed	ENSDARG00000044774 (directed) ENSDARG00000012389	false	directed	ENSDARG00000044774 (directed) ENSDARG00000012389	0.0576902	exact
aak1a	1.99846	pou5f3	directed	ENSDARG00000044774 (directed) ENSDARG00000011855	false	directed	ENSDARG00000044774 (directed) ENSDARG00000011855	0.0232516	exact
calcrla	1.61279	pou5f3	directed	ENSDARG00000044774 (directed) ENSDARG00000011473	false	directed	ENSDARG00000044774 (directed) ENSDARG00000011473	0.0291607	exact
akt2	1.7969	pou5f3	directed	ENSDARG00000044774 (directed) ENSDARG00000011219	false	directed	ENSDARG00000044774 (directed) ENSDARG00000011219	0.0537221	exact
kif11	2.08333	pou5f3	directed	ENSDARG00000044774 (directed) ENSDARG00000010948	false	directed	ENSDARG00000044774 (directed) ENSDARG00000010948	0.0680015	exact
cdc25b	1.24762	pou5f3	directed	ENSDARG00000044774 (directed) ENSDARG00000010792	false	directed	ENSDARG00000044774 (directed) ENSDARG00000010792	0.0189128	exact
npsnl	1.78099	pou5f3	directed	ENSDARG00000044774 (directed) ENSDARG00000010423	false	directed	ENSDARG00000044774 (directed) ENSDARG00000010423	0.0237687	exact
gigfy2	1.46667	pou5f3	directed	ENSDARG00000044774 (directed) ENSDARG00000009735	false	directed	ENSDARG00000044774 (directed) ENSDARG00000009735	0.0211532	exact
ubxn7	5.30119	pou5f3	directed	ENSDARG00000044774 (directed) ENSDARG00000009436	false	directed	ENSDARG00000044774 (directed) ENSDARG00000009436	0.0669126	exact
caprin1a	4.41833	pou5f3	directed	ENSDARG00000044774 (directed) ENSDARG00000009346	false	directed	ENSDARG00000044774 (directed) ENSDARG00000009346	0.0740892	exact
prkcda	1.45391	pou5f3	directed	ENSDARG00000044774 (directed) ENSDARG00000009208	false	directed	ENSDARG00000044774 (directed) ENSDARG00000009208	0.029559	exact
ctr9	1.40202	pou5f3	directed	ENSDARG00000044774 (directed) ENSDARG00000009170	false	directed	ENSDARG00000044774 (directed) ENSDARG00000009170	0.0698751	exact
pdia6	1.85882	pou5f3	directed	ENSDARG00000044774 (directed) ENSDARG00000009001	false	directed	ENSDARG00000044774 (directed) ENSDARG00000009001	0.0251646	exact
pofut1	1.78182	pou5f3	directed	ENSDARG00000044774 (directed) ENSDARG00000008953	false	directed	ENSDARG00000044774 (directed) ENSDARG00000008953	0.0140057	exact
atxn10	2.28956	pou5f3	directed	ENSDARG00000044774 (directed) ENSDARG00000008439	false	directed	ENSDARG00000044774 (directed) ENSDARG00000008439	0.0292292	exact
rcor2	1.28254	pou5f3	directed	ENSDARG00000044774 (directed) ENSDARG00000008278	false	directed	ENSDARG00000044774 (directed) ENSDARG00000008278	0.0578088	exact
serinc5	1.27692	pou5f3	directed	ENSDARG00000044774 (directed) ENSDARG00000008153	false	directed	ENSDARG00000044774 (directed) ENSDARG00000008153	0.0355604	exact
slc35b2	1.49091	pou5f3	directed	ENSDARG00000044774 (directed) ENSDARG00000007886	false	directed	ENSDARG00000044774 (directed) ENSDARG00000007886	0.0359564	exact
sult5a1	7.25457	pou5f3	directed	ENSDARG00000044774 (directed) ENSDARG00000007769	false	directed	ENSDARG00000044774 (directed) ENSDARG00000007769	0.0140148	exact
tmpoa	1.68333	pou5f3	directed	ENSDARG00000044774 (directed) ENSDARG00000007315	false	directed	ENSDARG00000044774 (directed) ENSDARG00000007315	0.0353658	exact
mynn	225.086	pou5f3	directed	ENSDARG00000044774 (directed) ENSDARG00000007271	false	directed	ENSDARG00000044774 (directed) ENSDARG00000007271	0.0558597	exact
asb7	2.0123	pou5f3	directed	ENSDARG00000044774 (directed) ENSDARG00000006494	false	directed	ENSDARG00000044774 (directed) ENSDARG00000006494	0.0691491	exact
anp32a	1.2	pou5f3	directed	ENSDARG00000044774 (directed) ENSDARG00000006487	false	directed	ENSDARG00000044774 (directed) ENSDARG00000006487	0.0521536	exact
mycla	1	pou5f3	directed	ENSDARG00000044774 (directed) ENSDARG00000006003	false	directed	ENSDARG00000044774 (directed) ENSDARG00000006003	0.039169	exact
paxip1	3.93968	pou5f3	directed	ENSDARG00000044774 (directed) ENSDARG00000005606	false	directed	ENSDARG00000044774 (directed) ENSDARG00000005606	0.0781778	exact
xpo7	3.30682	pou5f3	directed	ENSDARG00000044774 (directed) ENSDARG00000005540	false	directed	ENSDARG00000044774 (directed) ENSDARG00000005540	0.0839966	exact
gdf6b	2.3266	pou5f3	directed	ENSDARG00000044774 (directed) ENSDARG00000005510	false	directed	ENSDARG00000044774 (directed) ENSDARG00000005510	0.0136671	exact
tmc6b	3.34071	pou5f3	directed	ENSDARG00000044774 (directed) ENSDARG00000004875	false	directed	ENSDARG00000044774 (directed) ENSDARG00000004875	0.0117876	exact
foxp1a	2.59525	pou5f3	directed	ENSDARG00000044774 (directed) ENSDARG00000004843	false	directed	ENSDARG00000044774 (directed) ENSDARG00000004843	0.0493367	exact
hdr	1.2	pou5f3	directed	ENSDARG00000044774 (directed) ENSDARG00000004392	false	directed	ENSDARG00000044774 (directed) ENSDARG00000004392	0.0676332	exact
fmnl3	1.46223	pou5f3	directed	ENSDARG00000044774 (directed) ENSDARG00000004372	false	directed	ENSDARG00000044774 (directed) ENSDARG00000004372	0.0674776	exact
cnot1	1.1	pou5f3	directed	ENSDARG00000044774 (directed) ENSDARG00000004174	false	directed	ENSDARG00000044774 (directed) ENSDARG00000004174	0.0797703	exact
tlx1	1.82825	pou5f3	directed	ENSDARG00000044774 (directed) ENSDARG00000003965	false	directed	ENSDARG00000044774 (directed) ENSDARG00000003965	0.0268893	exact
pip4k2aa	1.48254	pou5f3	directed	ENSDARG00000044774 (directed) ENSDARG00000003776	false	directed	ENSDARG00000044774 (directed) ENSDARG00000003776	0.00647453	exact
nup93	3.36706	pou5f3	directed	ENSDARG00000044774 (directed) ENSDARG00000003487	false	directed	ENSDARG00000044774 (directed) ENSDARG00000003487	0.092939	exact
stc1	1.45397	pou5f3	directed	ENSDARG00000044774 (directed) ENSDARG00000003303	false	directed	ENSDARG00000044774 (directed) ENSDARG00000003303	0.0231577	exact
psmd1	2.00071	pou5f3	directed	ENSDARG00000044774 (directed) ENSDARG00000003189	false	directed	ENSDARG00000044774 (directed) ENSDARG00000003189	0.0355453	exact
gorasp1a	2.17785	pou5f3	directed	ENSDARG00000044774 (directed) ENSDARG00000003068	false	directed	ENSDARG00000044774 (directed) ENSDARG00000003068	0.0164818	exact
phc1	2.20092	pou5f3	directed	ENSDARG00000044774 (directed) ENSDARG00000002971	false	directed	ENSDARG00000044774 (directed) ENSDARG00000002971	0.0744551	exact
ppil2	4.35394	pou5f3	directed	ENSDARG00000044774 (directed) ENSDARG00000002016	false	directed	ENSDARG00000044774 (directed) ENSDARG00000002016	0.0437394	exact
nav2b	7.75238	pou5f3	directed	ENSDARG00000044774 (directed) ENSDARG00000001879	false	directed	ENSDARG00000044774 (directed) ENSDARG00000001879	0.0165623	exact
map4k2	1.4923	pou5f3	directed	ENSDARG00000044774 (directed) ENSDARG00000001234	false	directed	ENSDARG00000044774 (directed) ENSDARG00000001234	0.033076	exact
ENSDARG00000105513	1	irf1a	directed	ENSDARG00000043492 (directed) ENSDARG00000105513	false	directed	ENSDARG00000043492 (directed) ENSDARG00000105513	0.0288306	family
ENSDARG00000105374	1	irf1a	directed	ENSDARG00000043492 (directed) ENSDARG00000105374	false	directed	ENSDARG00000043492 (directed) ENSDARG00000105374	0.0802121	family
zgc:173552	1	irf1a	directed	ENSDARG00000043492 (directed) ENSDARG00000105345	false	directed	ENSDARG00000043492 (directed) ENSDARG00000105345	0.0619774	family
ENSDARG00000105294	1	irf1a	directed	ENSDARG00000043492 (directed) ENSDARG00000105294	false	directed	ENSDARG00000043492 (directed) ENSDARG00000105294	0.0199406	family
shkbp1	1	irf1a	directed	ENSDARG00000043492 (directed) ENSDARG00000105050	false	directed	ENSDARG00000043492 (directed) ENSDARG00000105050	0.041778	family
ENSDARG00000104940	1	irf1a	directed	ENSDARG00000043492 (directed) ENSDARG00000104940	false	directed	ENSDARG00000043492 (directed) ENSDARG00000104940	0.0216072	family
ENSDARG00000104861	1	irf1a	directed	ENSDARG00000043492 (directed) ENSDARG00000104861	false	directed	ENSDARG00000043492 (directed) ENSDARG00000104861	0.0107683	family
trim35-7	1	irf1a	directed	ENSDARG00000043492 (directed) ENSDARG00000104825	false	directed	ENSDARG00000043492 (directed) ENSDARG00000104825	0.0939973	family
zgc:171422	1	irf1a	directed	ENSDARG00000043492 (directed) ENSDARG00000104715	false	directed	ENSDARG00000043492 (directed) ENSDARG00000104715	0.0187715	family
ENSDARG00000104492	1	irf1a	directed	ENSDARG00000043492 (directed) ENSDARG00000104492	false	directed	ENSDARG00000043492 (directed) ENSDARG00000104492	0.0484356	family
esm1	1	irf1a	directed	ENSDARG00000043492 (directed) ENSDARG00000104370	false	directed	ENSDARG00000043492 (directed) ENSDARG00000104370	0.0351904	family
zgc:154064	1	irf1a	directed	ENSDARG00000043492 (directed) ENSDARG00000104316	false	directed	ENSDARG00000043492 (directed) ENSDARG00000104316	0.0164067	family
si:ch211-212k18.4	1	irf1a	directed	ENSDARG00000043492 (directed) ENSDARG00000104169	false	directed	ENSDARG00000043492 (directed) ENSDARG00000104169	0.0455272	family
hoxa11a	1	irf1a	directed	ENSDARG00000043492 (directed) ENSDARG00000104162	false	directed	ENSDARG00000043492 (directed) ENSDARG00000104162	0.0225716	family
ttf2	1	irf1a	directed	ENSDARG00000043492 (directed) ENSDARG00000104105	false	directed	ENSDARG00000043492 (directed) ENSDARG00000104105	0.0493594	family
arid3b	1	irf1a	directed	ENSDARG00000043492 (directed) ENSDARG00000104034	false	directed	ENSDARG00000043492 (directed) ENSDARG00000104034	0.0406656	family
calr3a	1	irf1a	directed	ENSDARG00000043492 (directed) ENSDARG00000103979	false	directed	ENSDARG00000043492 (directed) ENSDARG00000103979	0.0107738	family
terf2ip	1	irf1a	directed	ENSDARG00000043492 (directed) ENSDARG00000103977	false	directed	ENSDARG00000043492 (directed) ENSDARG00000103977	0.02219	family
zgc:154055	1	irf1a	directed	ENSDARG00000043492 (directed) ENSDARG00000103924	false	directed	ENSDARG00000043492 (directed) ENSDARG00000103924	0.0313092	family
sgol1	1	irf1a	directed	ENSDARG00000043492 (directed) ENSDARG00000103907	false	directed	ENSDARG00000043492 (directed) ENSDARG00000103907	0.0761722	family
cyyr1	1	irf1a	directed	ENSDARG00000043492 (directed) ENSDARG00000103783	false	directed	ENSDARG00000043492 (directed) ENSDARG00000103783	0.051166	family
LOC100535210	1	irf1a	directed	ENSDARG00000043492 (directed) ENSDARG00000103711	false	directed	ENSDARG00000043492 (directed) ENSDARG00000103711	0.0630571	family
wtip	1	irf1a	directed	ENSDARG00000043492 (directed) ENSDARG00000103607	false	directed	ENSDARG00000043492 (directed) ENSDARG00000103607	0.0504283	family
gtf2b	1	irf1a	directed	ENSDARG00000043492 (directed) ENSDARG00000103578	false	directed	ENSDARG00000043492 (directed) ENSDARG00000103578	0.0194058	family
ephb3b	1	irf1a	directed	ENSDARG00000043492 (directed) ENSDARG00000103576	false	directed	ENSDARG00000043492 (directed) ENSDARG00000103576	0.0788882	family
ENSDARG00000103525	1	irf1a	directed	ENSDARG00000043492 (directed) ENSDARG00000103525	false	directed	ENSDARG00000043492 (directed) ENSDARG00000103525	0.0584441	family
sec24c	1	irf1a	directed	ENSDARG00000043492 (directed) ENSDARG00000103516	false	directed	ENSDARG00000043492 (directed) ENSDARG00000103516	0.0243055	family
ENSDARG00000103415	1	irf1a	directed	ENSDARG00000043492 (directed) ENSDARG00000103415	false	directed	ENSDARG00000043492 (directed) ENSDARG00000103415	0.0700481	family
si:ch211-212k18.5	1	irf1a	directed	ENSDARG00000043492 (directed) ENSDARG00000103316	false	directed	ENSDARG00000043492 (directed) ENSDARG00000103316	0.0747275	family
ENSDARG00000103284	1	irf1a	directed	ENSDARG00000043492 (directed) ENSDARG00000103284	false	directed	ENSDARG00000043492 (directed) ENSDARG00000103284	0.0254702	family
gpr107	1	irf1a	directed	ENSDARG00000043492 (directed) ENSDARG00000103200	false	directed	ENSDARG00000043492 (directed) ENSDARG00000103200	0.0183629	family
LOC101882667	1	irf1a	directed	ENSDARG00000043492 (directed) ENSDARG00000103157	false	directed	ENSDARG00000043492 (directed) ENSDARG00000103157	0.0105797	family
zgc:110434	1	irf1a	directed	ENSDARG00000043492 (directed) ENSDARG00000103015	false	directed	ENSDARG00000043492 (directed) ENSDARG00000103015	0.0302256	family
vps54	1	irf1a	directed	ENSDARG00000043492 (directed) ENSDARG00000102960	false	directed	ENSDARG00000043492 (directed) ENSDARG00000102960	0.012143	family
fam193b	1	irf1a	directed	ENSDARG00000043492 (directed) ENSDARG00000102831	false	directed	ENSDARG00000043492 (directed) ENSDARG00000102831	0.0869466	family
tmem39a	1	irf1a	directed	ENSDARG00000043492 (directed) ENSDARG00000102746	false	directed	ENSDARG00000043492 (directed) ENSDARG00000102746	0.0710834	family
ENSDARG00000102651	1	irf1a	directed	ENSDARG00000043492 (directed) ENSDARG00000102651	false	directed	ENSDARG00000043492 (directed) ENSDARG00000102651	0.0162666	family
kdm8	1	irf1a	directed	ENSDARG00000043492 (directed) ENSDARG00000102512	false	directed	ENSDARG00000043492 (directed) ENSDARG00000102512	0.00879728	family
smarcal1	1	irf1a	directed	ENSDARG00000043492 (directed) ENSDARG00000102265	false	directed	ENSDARG00000043492 (directed) ENSDARG00000102265	0.0471141	family
si:ch211-71n6.4	1	irf1a	directed	ENSDARG00000043492 (directed) ENSDARG00000102234	false	directed	ENSDARG00000043492 (directed) ENSDARG00000102234	0.0413071	family
phospho2	1	irf1a	directed	ENSDARG00000043492 (directed) ENSDARG00000102202	false	directed	ENSDARG00000043492 (directed) ENSDARG00000102202	0.0137366	family
ppox	1	irf1a	directed	ENSDARG00000043492 (directed) ENSDARG00000102167	false	directed	ENSDARG00000043492 (directed) ENSDARG00000102167	0.0222251	family
ENSDARG00000102117	1	irf1a	directed	ENSDARG00000043492 (directed) ENSDARG00000102117	false	directed	ENSDARG00000043492 (directed) ENSDARG00000102117	0.0227964	family
ENSDARG00000102053	1	irf1a	directed	ENSDARG00000043492 (directed) ENSDARG00000102053	false	directed	ENSDARG00000043492 (directed) ENSDARG00000102053	0.0210416	family
pkn2	1	irf1a	directed	ENSDARG00000043492 (directed) ENSDARG00000101983	false	directed	ENSDARG00000043492 (directed) ENSDARG00000101983	0.0469732	family
ptbp2a	1	irf1a	directed	ENSDARG00000043492 (directed) ENSDARG00000101947	false	directed	ENSDARG00000043492 (directed) ENSDARG00000101947	0.0546625	family
zgc:152816	1	irf1a	directed	ENSDARG00000043492 (directed) ENSDARG00000101808	false	directed	ENSDARG00000043492 (directed) ENSDARG00000101808	0.0435553	family
plekhg5b	1	irf1a	directed	ENSDARG00000043492 (directed) ENSDARG00000101752	false	directed	ENSDARG00000043492 (directed) ENSDARG00000101752	0.0227206	family
si:dkey-30e9.7	1	irf1a	directed	ENSDARG00000043492 (directed) ENSDARG00000101697	false	directed	ENSDARG00000043492 (directed) ENSDARG00000101697	0.0536308	family
kntc1	1	irf1a	directed	ENSDARG00000043492 (directed) ENSDARG00000101670	false	directed	ENSDARG00000043492 (directed) ENSDARG00000101670	0.0703407	family
ccnd1	1	irf1a	directed	ENSDARG00000043492 (directed) ENSDARG00000101637	false	directed	ENSDARG00000043492 (directed) ENSDARG00000101637	0.068572	family
e2f4	155.017	irf1a	directed	ENSDARG00000043492 (directed) ENSDARG00000101578	false	directed	ENSDARG00000043492 (directed) ENSDARG00000101578	0.0938193	family
ENSDARG00000101572	1	irf1a	directed	ENSDARG00000043492 (directed) ENSDARG00000101572	false	directed	ENSDARG00000043492 (directed) ENSDARG00000101572	0.0542594	family
psma1	1	irf1a	directed	ENSDARG00000043492 (directed) ENSDARG00000101560	false	directed	ENSDARG00000043492 (directed) ENSDARG00000101560	0.0191943	family
LOC103911715	1	irf1a	directed	ENSDARG00000043492 (directed) ENSDARG00000101208	false	directed	ENSDARG00000043492 (directed) ENSDARG00000101208	0.0258475	family
LOC568955	1	irf1a	directed	ENSDARG00000043492 (directed) ENSDARG00000101203	false	directed	ENSDARG00000043492 (directed) ENSDARG00000101203	0.0320636	family
nufip1	1	irf1a	directed	ENSDARG00000043492 (directed) ENSDARG00000101024	false	directed	ENSDARG00000043492 (directed) ENSDARG00000101024	0.037532	family
LOC100333697	1	irf1a	directed	ENSDARG00000043492 (directed) ENSDARG00000100999	false	directed	ENSDARG00000043492 (directed) ENSDARG00000100999	0.0532432	family
prc1a	1	irf1a	directed	ENSDARG00000043492 (directed) ENSDARG00000100918	false	directed	ENSDARG00000043492 (directed) ENSDARG00000100918	0.0872433	family
arhgef12b	1	irf1a	directed	ENSDARG00000043492 (directed) ENSDARG00000100913	false	directed	ENSDARG00000043492 (directed) ENSDARG00000100913	0.0403176	family
zmynd19	1	irf1a	directed	ENSDARG00000043492 (directed) ENSDARG00000100773	false	directed	ENSDARG00000043492 (directed) ENSDARG00000100773	0.0287694	family
egfl7	1	irf1a	directed	ENSDARG00000043492 (directed) ENSDARG00000100657	false	directed	ENSDARG00000043492 (directed) ENSDARG00000100657	0.0783271	family
slbp	1	irf1a	directed	ENSDARG00000043492 (directed) ENSDARG00000100558	false	directed	ENSDARG00000043492 (directed) ENSDARG00000100558	0.0587305	family
alad	1	irf1a	directed	ENSDARG00000043492 (directed) ENSDARG00000100372	false	directed	ENSDARG00000043492 (directed) ENSDARG00000100372	0.0282912	family
ahsa1b	1	irf1a	directed	ENSDARG00000043492 (directed) ENSDARG00000100317	false	directed	ENSDARG00000043492 (directed) ENSDARG00000100317	0.0139519	family
thumpd1	1	irf1a	directed	ENSDARG00000043492 (directed) ENSDARG00000100264	false	directed	ENSDARG00000043492 (directed) ENSDARG00000100264	0.0189663	family
zgc:63694	1	irf1a	directed	ENSDARG00000043492 (directed) ENSDARG00000100227	false	directed	ENSDARG00000043492 (directed) ENSDARG00000100227	0.0413964	family
tcf3b	1	irf1a	directed	ENSDARG00000043492 (directed) ENSDARG00000099999	false	directed	ENSDARG00000043492 (directed) ENSDARG00000099999	0.0954095	family
si:ch211-207i20.2	1	irf1a	directed	ENSDARG00000043492 (directed) ENSDARG00000099986	false	directed	ENSDARG00000043492 (directed) ENSDARG00000099986	0.0213516	family
ENSDARG00000099981	1	irf1a	directed	ENSDARG00000043492 (directed) ENSDARG00000099981	false	directed	ENSDARG00000043492 (directed) ENSDARG00000099981	0.0747744	family
tbce	1	irf1a	directed	ENSDARG00000043492 (directed) ENSDARG00000099921	false	directed	ENSDARG00000043492 (directed) ENSDARG00000099921	0.0319241	family
arl4aa	1	irf1a	directed	ENSDARG00000043492 (directed) ENSDARG00000099918	false	directed	ENSDARG00000043492 (directed) ENSDARG00000099918	0.065648	family
si:dkey-114g7.4	1	irf1a	directed	ENSDARG00000043492 (directed) ENSDARG00000099814	false	directed	ENSDARG00000043492 (directed) ENSDARG00000099814	0.0250709	family
baz1a	1	irf1a	directed	ENSDARG00000043492 (directed) ENSDARG00000099745	false	directed	ENSDARG00000043492 (directed) ENSDARG00000099745	0.0137972	family
eed	1	irf1a	directed	ENSDARG00000043492 (directed) ENSDARG00000099640	false	directed	ENSDARG00000043492 (directed) ENSDARG00000099640	0.0367699	family
ENSDARG00000099569	1	irf1a	directed	ENSDARG00000043492 (directed) ENSDARG00000099569	false	directed	ENSDARG00000043492 (directed) ENSDARG00000099569	0.043447	family
cnnm3	1	irf1a	directed	ENSDARG00000043492 (directed) ENSDARG00000099568	false	directed	ENSDARG00000043492 (directed) ENSDARG00000099568	0.0114162	family
cnn3a	1	irf1a	directed	ENSDARG00000043492 (directed) ENSDARG00000099510	false	directed	ENSDARG00000043492 (directed) ENSDARG00000099510	0.05879	family
fbxw5	1	irf1a	directed	ENSDARG00000043492 (directed) ENSDARG00000099139	false	directed	ENSDARG00000043492 (directed) ENSDARG00000099139	0.0216897	family
ENSDARG00000099091	1	irf1a	directed	ENSDARG00000043492 (directed) ENSDARG00000099091	false	directed	ENSDARG00000043492 (directed) ENSDARG00000099091	0.0320107	family
pex1	1	irf1a	directed	ENSDARG00000043492 (directed) ENSDARG00000098904	false	directed	ENSDARG00000043492 (directed) ENSDARG00000098904	0.0164429	family
pds5b	1	irf1a	directed	ENSDARG00000043492 (directed) ENSDARG00000098897	false	directed	ENSDARG00000043492 (directed) ENSDARG00000098897	0.0737404	family
tubb2b	1	irf1a	directed	ENSDARG00000043492 (directed) ENSDARG00000098591	false	directed	ENSDARG00000043492 (directed) ENSDARG00000098591	0.0684093	family
pdgfab	1	irf1a	directed	ENSDARG00000043492 (directed) ENSDARG00000098578	false	directed	ENSDARG00000043492 (directed) ENSDARG00000098578	0.0685952	family
srsf11	1	irf1a	directed	ENSDARG00000043492 (directed) ENSDARG00000098574	false	directed	ENSDARG00000043492 (directed) ENSDARG00000098574	0.0601788	family
ENSDARG00000098543	1	irf1a	directed	ENSDARG00000043492 (directed) ENSDARG00000098543	false	directed	ENSDARG00000043492 (directed) ENSDARG00000098543	0.0234314	family
ENSDARG00000098503	1	irf1a	directed	ENSDARG00000043492 (directed) ENSDARG00000098503	false	directed	ENSDARG00000043492 (directed) ENSDARG00000098503	0.0340882	family
LOC563292	1	irf1a	directed	ENSDARG00000043492 (directed) ENSDARG00000098424	false	directed	ENSDARG00000043492 (directed) ENSDARG00000098424	0.0546041	family
actr5	1	irf1a	directed	ENSDARG00000043492 (directed) ENSDARG00000098235	false	directed	ENSDARG00000043492 (directed) ENSDARG00000098235	0.0138269	family
wrn	1	irf1a	directed	ENSDARG00000043492 (directed) ENSDARG00000098211	false	directed	ENSDARG00000043492 (directed) ENSDARG00000098211	0.0480227	family
si:dkeyp-97a10.2	1	irf1a	directed	ENSDARG00000043492 (directed) ENSDARG00000098129	false	directed	ENSDARG00000043492 (directed) ENSDARG00000098129	0.0391076	family
ENSDARG00000097600	1	irf1a	directed	ENSDARG00000043492 (directed) ENSDARG00000097600	false	directed	ENSDARG00000043492 (directed) ENSDARG00000097600	0.00917636	family
ugt1b1	1	irf1a	directed	ENSDARG00000043492 (directed) ENSDARG00000097491	false	directed	ENSDARG00000043492 (directed) ENSDARG00000097491	0.0437389	family
si:dkey-108k21.25	1	irf1a	directed	ENSDARG00000043492 (directed) ENSDARG00000097258	false	directed	ENSDARG00000043492 (directed) ENSDARG00000097258	0.0685897	family
ENSDARG00000096978	1	irf1a	directed	ENSDARG00000043492 (directed) ENSDARG00000096978	false	directed	ENSDARG00000043492 (directed) ENSDARG00000096978	0.0915877	family
LOC108179323	1	irf1a	directed	ENSDARG00000043492 (directed) ENSDARG00000096951	false	directed	ENSDARG00000043492 (directed) ENSDARG00000096951	0.0702011	family
ENSDARG00000096894	1	irf1a	directed	ENSDARG00000043492 (directed) ENSDARG00000096894	false	directed	ENSDARG00000043492 (directed) ENSDARG00000096894	0.0184592	family
si:dkey-66i24.9	1	irf1a	directed	ENSDARG00000043492 (directed) ENSDARG00000096689	false	directed	ENSDARG00000043492 (directed) ENSDARG00000096689	0.0383314	family
si:dkey-25o16.2	1	irf1a	directed	ENSDARG00000043492 (directed) ENSDARG00000096667	false	directed	ENSDARG00000043492 (directed) ENSDARG00000096667	0.0489105	family
si:dkey-45d16.4	1	irf1a	directed	ENSDARG00000043492 (directed) ENSDARG00000096421	false	directed	ENSDARG00000043492 (directed) ENSDARG00000096421	0.0320079	family
si:dkey-260c8.8	1	irf1a	directed	ENSDARG00000043492 (directed) ENSDARG00000096229	false	directed	ENSDARG00000043492 (directed) ENSDARG00000096229	0.0388834	family
ENSDARG00000095340	1	irf1a	directed	ENSDARG00000043492 (directed) ENSDARG00000095340	false	directed	ENSDARG00000043492 (directed) ENSDARG00000095340	0.0680128	family
si:dkey-14d8.1	1	irf1a	directed	ENSDARG00000043492 (directed) ENSDARG00000095332	false	directed	ENSDARG00000043492 (directed) ENSDARG00000095332	0.0363503	family
ENSDARG00000095304	1	irf1a	directed	ENSDARG00000043492 (directed) ENSDARG00000095304	false	directed	ENSDARG00000043492 (directed) ENSDARG00000095304	0.0170518	family
si:ch211-113a14.15	1	irf1a	directed	ENSDARG00000043492 (directed) ENSDARG00000094744	false	directed	ENSDARG00000043492 (directed) ENSDARG00000094744	0.0802384	family
dyrk2	1	irf1a	directed	ENSDARG00000043492 (directed) ENSDARG00000094646	false	directed	ENSDARG00000043492 (directed) ENSDARG00000094646	0.0156542	family
si:dkey-111e8.1	1	irf1a	directed	ENSDARG00000043492 (directed) ENSDARG00000094018	false	directed	ENSDARG00000043492 (directed) ENSDARG00000094018	0.0372449	family
si:ch73-209l12.1	1	irf1a	directed	ENSDARG00000043492 (directed) ENSDARG00000092776	false	directed	ENSDARG00000043492 (directed) ENSDARG00000092776	0.0779448	family
si:dkey-108k21.17	1	irf1a	directed	ENSDARG00000043492 (directed) ENSDARG00000092743	false	directed	ENSDARG00000043492 (directed) ENSDARG00000092743	0.082338	family
thbd	1	irf1a	directed	ENSDARG00000043492 (directed) ENSDARG00000092470	false	directed	ENSDARG00000043492 (directed) ENSDARG00000092470	0.0284683	family
ENSDARG00000092246	1	irf1a	directed	ENSDARG00000043492 (directed) ENSDARG00000092246	false	directed	ENSDARG00000043492 (directed) ENSDARG00000092246	0.0194442	family
LOC100535981	1	irf1a	directed	ENSDARG00000043492 (directed) ENSDARG00000092199	false	directed	ENSDARG00000043492 (directed) ENSDARG00000092199	0.0337405	family
zbtb40	1	irf1a	directed	ENSDARG00000043492 (directed) ENSDARG00000091762	false	directed	ENSDARG00000043492 (directed) ENSDARG00000091762	0.0138518	family
lsm8	1	irf1a	directed	ENSDARG00000043492 (directed) ENSDARG00000091656	false	directed	ENSDARG00000043492 (directed) ENSDARG00000091656	0.0520972	family
xrn1	1	irf1a	directed	ENSDARG00000043492 (directed) ENSDARG00000091652	false	directed	ENSDARG00000043492 (directed) ENSDARG00000091652	0.0626531	family
si:ch73-352p4.5	1	irf1a	directed	ENSDARG00000043492 (directed) ENSDARG00000091640	false	directed	ENSDARG00000043492 (directed) ENSDARG00000091640	0.0428366	family
nfrkb	1	irf1a	directed	ENSDARG00000043492 (directed) ENSDARG00000091512	false	directed	ENSDARG00000043492 (directed) ENSDARG00000091512	0.0634683	family
prpf6	1	irf1a	directed	ENSDARG00000043492 (directed) ENSDARG00000091367	false	directed	ENSDARG00000043492 (directed) ENSDARG00000091367	0.031656	family
cry1bb	1	irf1a	directed	ENSDARG00000043492 (directed) ENSDARG00000091131	false	directed	ENSDARG00000043492 (directed) ENSDARG00000091131	0.0259013	family
zcchc10	1	irf1a	directed	ENSDARG00000043492 (directed) ENSDARG00000091092	false	directed	ENSDARG00000043492 (directed) ENSDARG00000091092	0.0541841	family
il34	1	irf1a	directed	ENSDARG00000043492 (directed) ENSDARG00000091003	false	directed	ENSDARG00000043492 (directed) ENSDARG00000091003	0.0613626	family
parm1	1	irf1a	directed	ENSDARG00000043492 (directed) ENSDARG00000090996	false	directed	ENSDARG00000043492 (directed) ENSDARG00000090996	0.051473	family
si:dkeyp-115e12.6	1	irf1a	directed	ENSDARG00000043492 (directed) ENSDARG00000090986	false	directed	ENSDARG00000043492 (directed) ENSDARG00000090986	0.0597054	family
plk2a	1	irf1a	directed	ENSDARG00000043492 (directed) ENSDARG00000090752	false	directed	ENSDARG00000043492 (directed) ENSDARG00000090752	0.0342067	family
MGC173646	1	irf1a	directed	ENSDARG00000043492 (directed) ENSDARG00000090689	false	directed	ENSDARG00000043492 (directed) ENSDARG00000090689	0.0557756	family
mir222	1	irf1a	directed	ENSDARG00000043492 (directed) ENSDARG00000090347	false	directed	ENSDARG00000043492 (directed) ENSDARG00000090347	0.0119372	family
wu:fb39e10	1	irf1a	directed	ENSDARG00000043492 (directed) ENSDARG00000089967	false	directed	ENSDARG00000043492 (directed) ENSDARG00000089967	0.0548976	family
ENSDARG00000089963	1	irf1a	directed	ENSDARG00000043492 (directed) ENSDARG00000089963	false	directed	ENSDARG00000043492 (directed) ENSDARG00000089963	0.0582645	family
dsn1	1	irf1a	directed	ENSDARG00000043492 (directed) ENSDARG00000089922	false	directed	ENSDARG00000043492 (directed) ENSDARG00000089922	0.034903	family
si:ch211-265o23.1	1	irf1a	directed	ENSDARG00000043492 (directed) ENSDARG00000089908	false	directed	ENSDARG00000043492 (directed) ENSDARG00000089908	0.0458555	family
akap1a	1	irf1a	directed	ENSDARG00000043492 (directed) ENSDARG00000089802	false	directed	ENSDARG00000043492 (directed) ENSDARG00000089802	0.0161132	family
trabd2a	1	irf1a	directed	ENSDARG00000043492 (directed) ENSDARG00000089701	false	directed	ENSDARG00000043492 (directed) ENSDARG00000089701	0.0636904	family
ENSDARG00000089622	1	irf1a	directed	ENSDARG00000043492 (directed) ENSDARG00000089622	false	directed	ENSDARG00000043492 (directed) ENSDARG00000089622	0.0656895	family
ogmb	1	irf1a	directed	ENSDARG00000043492 (directed) ENSDARG00000089444	false	directed	ENSDARG00000043492 (directed) ENSDARG00000089444	0.0128639	family
ushbp1	1	irf1a	directed	ENSDARG00000043492 (directed) ENSDARG00000089071	false	directed	ENSDARG00000043492 (directed) ENSDARG00000089071	0.0148838	family
si:ch211-168f7.5	1	irf1a	directed	ENSDARG00000043492 (directed) ENSDARG00000088195	false	directed	ENSDARG00000043492 (directed) ENSDARG00000088195	0.0701229	family
kdm6ba	1	irf1a	directed	ENSDARG00000043492 (directed) ENSDARG00000088087	false	directed	ENSDARG00000043492 (directed) ENSDARG00000088087	0.0605656	family
rpap3	1	irf1a	directed	ENSDARG00000043492 (directed) ENSDARG00000087962	false	directed	ENSDARG00000043492 (directed) ENSDARG00000087962	0.0274554	family
plekhn1	1	irf1a	directed	ENSDARG00000043492 (directed) ENSDARG00000087844	false	directed	ENSDARG00000043492 (directed) ENSDARG00000087844	0.0323051	family
rfwd3	1	irf1a	directed	ENSDARG00000043492 (directed) ENSDARG00000087752	false	directed	ENSDARG00000043492 (directed) ENSDARG00000087752	0.0267919	family
atxn1l	1	irf1a	directed	ENSDARG00000043492 (directed) ENSDARG00000086977	false	directed	ENSDARG00000043492 (directed) ENSDARG00000086977	0.048385	family
ENSDARG00000086708	1	irf1a	directed	ENSDARG00000043492 (directed) ENSDARG00000086708	false	directed	ENSDARG00000043492 (directed) ENSDARG00000086708	0.0620373	family
ice2	1	irf1a	directed	ENSDARG00000043492 (directed) ENSDARG00000086670	false	directed	ENSDARG00000043492 (directed) ENSDARG00000086670	0.0238706	family
gpr156	1	irf1a	directed	ENSDARG00000043492 (directed) ENSDARG00000086215	false	directed	ENSDARG00000043492 (directed) ENSDARG00000086215	0.0323323	family
dhx9	1	irf1a	directed	ENSDARG00000043492 (directed) ENSDARG00000079725	false	directed	ENSDARG00000043492 (directed) ENSDARG00000079725	0.106335	family
elf2b	100.247	irf1a	directed	ENSDARG00000043492 (directed) ENSDARG00000079626	false	directed	ENSDARG00000043492 (directed) ENSDARG00000079626	0.042248	family
atr	1	irf1a	directed	ENSDARG00000043492 (directed) ENSDARG00000079625	false	directed	ENSDARG00000043492 (directed) ENSDARG00000079625	0.0141402	family
gatsl3	1	irf1a	directed	ENSDARG00000043492 (directed) ENSDARG00000079588	false	directed	ENSDARG00000043492 (directed) ENSDARG00000079588	0.0197671	family
pkn3	1	irf1a	directed	ENSDARG00000043492 (directed) ENSDARG00000079585	false	directed	ENSDARG00000043492 (directed) ENSDARG00000079585	0.0319294	family
si:ch211-132p1.2	1	irf1a	directed	ENSDARG00000043492 (directed) ENSDARG00000079399	false	directed	ENSDARG00000043492 (directed) ENSDARG00000079399	0.0452179	family
flrt2	1	irf1a	directed	ENSDARG00000043492 (directed) ENSDARG00000079355	false	directed	ENSDARG00000043492 (directed) ENSDARG00000079355	0.0587371	family
kmt2ca	1	irf1a	directed	ENSDARG00000043492 (directed) ENSDARG00000079312	false	directed	ENSDARG00000043492 (directed) ENSDARG00000079312	0.0527544	family
rlim	1	irf1a	directed	ENSDARG00000043492 (directed) ENSDARG00000079306	false	directed	ENSDARG00000043492 (directed) ENSDARG00000079306	0.0268258	family
brca2	1	irf1a	directed	ENSDARG00000043492 (directed) ENSDARG00000079015	false	directed	ENSDARG00000043492 (directed) ENSDARG00000079015	0.0272991	family
fam118b	1	irf1a	directed	ENSDARG00000043492 (directed) ENSDARG00000078983	false	directed	ENSDARG00000043492 (directed) ENSDARG00000078983	0.0451169	family
supt20	1	irf1a	directed	ENSDARG00000043492 (directed) ENSDARG00000078658	false	directed	ENSDARG00000043492 (directed) ENSDARG00000078658	0.0612448	family
zgc:195081	1	irf1a	directed	ENSDARG00000043492 (directed) ENSDARG00000078481	false	directed	ENSDARG00000043492 (directed) ENSDARG00000078481	0.0391002	family
oat	1	irf1a	directed	ENSDARG00000043492 (directed) ENSDARG00000078425	false	directed	ENSDARG00000043492 (directed) ENSDARG00000078425	0.0115444	family
hspb15	1	irf1a	directed	ENSDARG00000043492 (directed) ENSDARG00000078411	false	directed	ENSDARG00000043492 (directed) ENSDARG00000078411	0.0346101	family
larp4aa	1	irf1a	directed	ENSDARG00000043492 (directed) ENSDARG00000078401	false	directed	ENSDARG00000043492 (directed) ENSDARG00000078401	0.0488121	family
sec22a	1	irf1a	directed	ENSDARG00000043492 (directed) ENSDARG00000078328	false	directed	ENSDARG00000043492 (directed) ENSDARG00000078328	0.029312	family
ptgfrn	1	irf1a	directed	ENSDARG00000043492 (directed) ENSDARG00000078172	false	directed	ENSDARG00000043492 (directed) ENSDARG00000078172	0.0525527	family
mrc2	1	irf1a	directed	ENSDARG00000043492 (directed) ENSDARG00000078135	false	directed	ENSDARG00000043492 (directed) ENSDARG00000078135	0.0918712	family
limd2	1	irf1a	directed	ENSDARG00000043492 (directed) ENSDARG00000078092	false	directed	ENSDARG00000043492 (directed) ENSDARG00000078092	0.0799245	family
si:dkey-6i22.5	1	irf1a	directed	ENSDARG00000043492 (directed) ENSDARG00000077822	false	directed	ENSDARG00000043492 (directed) ENSDARG00000077822	0.0354982	family
hgsnat	1	irf1a	directed	ENSDARG00000043492 (directed) ENSDARG00000077804	false	directed	ENSDARG00000043492 (directed) ENSDARG00000077804	0.0342915	family
arhgef10	1	irf1a	directed	ENSDARG00000043492 (directed) ENSDARG00000077788	false	directed	ENSDARG00000043492 (directed) ENSDARG00000077788	0.0341785	family
rin3	1	irf1a	directed	ENSDARG00000043492 (directed) ENSDARG00000077618	false	directed	ENSDARG00000043492 (directed) ENSDARG00000077618	0.0173013	family
zzz3	1	irf1a	directed	ENSDARG00000043492 (directed) ENSDARG00000077581	false	directed	ENSDARG00000043492 (directed) ENSDARG00000077581	0.0781253	family
pign	1	irf1a	directed	ENSDARG00000043492 (directed) ENSDARG00000077532	false	directed	ENSDARG00000043492 (directed) ENSDARG00000077532	0.0633555	family
ahctf1	1	irf1a	directed	ENSDARG00000043492 (directed) ENSDARG00000077530	false	directed	ENSDARG00000043492 (directed) ENSDARG00000077530	0.0882984	family
hip1ra	1	irf1a	directed	ENSDARG00000043492 (directed) ENSDARG00000077445	false	directed	ENSDARG00000043492 (directed) ENSDARG00000077445	0.0211115	family
rassf10a	1	irf1a	directed	ENSDARG00000043492 (directed) ENSDARG00000077424	false	directed	ENSDARG00000043492 (directed) ENSDARG00000077424	0.012696	family
bptf	1	irf1a	directed	ENSDARG00000043492 (directed) ENSDARG00000077361	false	directed	ENSDARG00000043492 (directed) ENSDARG00000077361	0.0924664	family
tmem201	1	irf1a	directed	ENSDARG00000043492 (directed) ENSDARG00000077307	false	directed	ENSDARG00000043492 (directed) ENSDARG00000077307	0.0259394	family
si:ch211-160o17.4	1	irf1a	directed	ENSDARG00000043492 (directed) ENSDARG00000077095	false	directed	ENSDARG00000043492 (directed) ENSDARG00000077095	0.0477095	family
blm	1	irf1a	directed	ENSDARG00000043492 (directed) ENSDARG00000077089	false	directed	ENSDARG00000043492 (directed) ENSDARG00000077089	0.066183	family
esco1	1	irf1a	directed	ENSDARG00000043492 (directed) ENSDARG00000077057	false	directed	ENSDARG00000043492 (directed) ENSDARG00000077057	0.0264435	family
pbrm1l	1	irf1a	directed	ENSDARG00000043492 (directed) ENSDARG00000077038	false	directed	ENSDARG00000043492 (directed) ENSDARG00000077038	0.107904	family
cep70	1	irf1a	directed	ENSDARG00000043492 (directed) ENSDARG00000076965	false	directed	ENSDARG00000043492 (directed) ENSDARG00000076965	0.021495	family
kel	1	irf1a	directed	ENSDARG00000043492 (directed) ENSDARG00000076950	false	directed	ENSDARG00000043492 (directed) ENSDARG00000076950	0.0270223	family
igdcc4	1	irf1a	directed	ENSDARG00000043492 (directed) ENSDARG00000076919	false	directed	ENSDARG00000043492 (directed) ENSDARG00000076919	0.0682764	family
ralgapa1	1	irf1a	directed	ENSDARG00000043492 (directed) ENSDARG00000076889	false	directed	ENSDARG00000043492 (directed) ENSDARG00000076889	0.0500122	family
arap3	1	irf1a	directed	ENSDARG00000043492 (directed) ENSDARG00000076801	false	directed	ENSDARG00000043492 (directed) ENSDARG00000076801	0.0568265	family
prkra	1	irf1a	directed	ENSDARG00000043492 (directed) ENSDARG00000076718	false	directed	ENSDARG00000043492 (directed) ENSDARG00000076718	0.0413548	family
plagl2	1	irf1a	directed	ENSDARG00000043492 (directed) ENSDARG00000076657	false	directed	ENSDARG00000043492 (directed) ENSDARG00000076657	0.0842828	family
dusp12	1	irf1a	directed	ENSDARG00000043492 (directed) ENSDARG00000076330	false	directed	ENSDARG00000043492 (directed) ENSDARG00000076330	0.0144818	family
lmtk2	1	irf1a	directed	ENSDARG00000043492 (directed) ENSDARG00000076324	false	directed	ENSDARG00000043492 (directed) ENSDARG00000076324	0.0409214	family
mmrn2a	1	irf1a	directed	ENSDARG00000043492 (directed) ENSDARG00000076135	false	directed	ENSDARG00000043492 (directed) ENSDARG00000076135	0.0389371	family
pappa2	1	irf1a	directed	ENSDARG00000043492 (directed) ENSDARG00000076020	false	directed	ENSDARG00000043492 (directed) ENSDARG00000076020	0.040234	family
pigt	1	irf1a	directed	ENSDARG00000043492 (directed) ENSDARG00000075842	false	directed	ENSDARG00000043492 (directed) ENSDARG00000075842	0.0207508	family
zfyve16	1	irf1a	directed	ENSDARG00000043492 (directed) ENSDARG00000075747	false	directed	ENSDARG00000043492 (directed) ENSDARG00000075747	0.0448048	family
si:ch211-267e7.3	1	irf1a	directed	ENSDARG00000043492 (directed) ENSDARG00000075487	false	directed	ENSDARG00000043492 (directed) ENSDARG00000075487	0.0737658	family
zgc:173587	1	irf1a	directed	ENSDARG00000043492 (directed) ENSDARG00000075482	false	directed	ENSDARG00000043492 (directed) ENSDARG00000075482	0.0662395	family
znf989	1	irf1a	directed	ENSDARG00000043492 (directed) ENSDARG00000075470	false	directed	ENSDARG00000043492 (directed) ENSDARG00000075470	0.0280863	family
naa25	1	irf1a	directed	ENSDARG00000043492 (directed) ENSDARG00000075446	false	directed	ENSDARG00000043492 (directed) ENSDARG00000075446	0.0808703	family
pttg1	1	irf1a	directed	ENSDARG00000043492 (directed) ENSDARG00000075421	false	directed	ENSDARG00000043492 (directed) ENSDARG00000075421	0.0110795	family
espl1	1	irf1a	directed	ENSDARG00000043492 (directed) ENSDARG00000075354	false	directed	ENSDARG00000043492 (directed) ENSDARG00000075354	0.0676847	family
chd7	1	irf1a	directed	ENSDARG00000043492 (directed) ENSDARG00000075211	false	directed	ENSDARG00000043492 (directed) ENSDARG00000075211	0.110351	family
tmem14ca	1	irf1a	directed	ENSDARG00000043492 (directed) ENSDARG00000075180	false	directed	ENSDARG00000043492 (directed) ENSDARG00000075180	0.0344655	family
mylk5	1	irf1a	directed	ENSDARG00000043492 (directed) ENSDARG00000075164	false	directed	ENSDARG00000043492 (directed) ENSDARG00000075164	0.0279552	family
nanp	1	irf1a	directed	ENSDARG00000043492 (directed) ENSDARG00000075143	false	directed	ENSDARG00000043492 (directed) ENSDARG00000075143	0.0159108	family
LOC108179033	1	irf1a	directed	ENSDARG00000043492 (directed) ENSDARG00000075119	false	directed	ENSDARG00000043492 (directed) ENSDARG00000075119	0.0395874	family
rpap1	1	irf1a	directed	ENSDARG00000043492 (directed) ENSDARG00000075072	false	directed	ENSDARG00000043492 (directed) ENSDARG00000075072	0.0396852	family
bub1bb	1	irf1a	directed	ENSDARG00000043492 (directed) ENSDARG00000074927	false	directed	ENSDARG00000043492 (directed) ENSDARG00000074927	0.0994276	family
rasip1	1	irf1a	directed	ENSDARG00000043492 (directed) ENSDARG00000074829	false	directed	ENSDARG00000043492 (directed) ENSDARG00000074829	0.0529625	family
dbf4	1	irf1a	directed	ENSDARG00000043492 (directed) ENSDARG00000074796	false	directed	ENSDARG00000043492 (directed) ENSDARG00000074796	0.0573274	family
arfgef2	1	irf1a	directed	ENSDARG00000043492 (directed) ENSDARG00000074702	false	directed	ENSDARG00000043492 (directed) ENSDARG00000074702	0.0338342	family
pan2	1	irf1a	directed	ENSDARG00000043492 (directed) ENSDARG00000074675	false	directed	ENSDARG00000043492 (directed) ENSDARG00000074675	0.0322086	family
ENSDARG00000074645	1	irf1a	directed	ENSDARG00000043492 (directed) ENSDARG00000074645	false	directed	ENSDARG00000043492 (directed) ENSDARG00000074645	0.0249599	family
cep170b	1	irf1a	directed	ENSDARG00000043492 (directed) ENSDARG00000074636	false	directed	ENSDARG00000043492 (directed) ENSDARG00000074636	0.059765	family
gpr78a	1	irf1a	directed	ENSDARG00000043492 (directed) ENSDARG00000074600	false	directed	ENSDARG00000043492 (directed) ENSDARG00000074600	0.0604328	family
slc25a38b	1	irf1a	directed	ENSDARG00000043492 (directed) ENSDARG00000074533	false	directed	ENSDARG00000043492 (directed) ENSDARG00000074533	0.0485301	family
zbtb16b	1	irf1a	directed	ENSDARG00000043492 (directed) ENSDARG00000074526	false	directed	ENSDARG00000043492 (directed) ENSDARG00000074526	0.0664687	family
eif4g3b	1	irf1a	directed	ENSDARG00000043492 (directed) ENSDARG00000074331	false	directed	ENSDARG00000043492 (directed) ENSDARG00000074331	0.0741048	family
mcm8	1	irf1a	directed	ENSDARG00000043492 (directed) ENSDARG00000074326	false	directed	ENSDARG00000043492 (directed) ENSDARG00000074326	0.0754032	family
gpr183b	1	irf1a	directed	ENSDARG00000043492 (directed) ENSDARG00000074302	false	directed	ENSDARG00000043492 (directed) ENSDARG00000074302	0.0191995	family
rap1gap2b	1	irf1a	directed	ENSDARG00000043492 (directed) ENSDARG00000074222	false	directed	ENSDARG00000043492 (directed) ENSDARG00000074222	0.0417912	family
rnf26	1	irf1a	directed	ENSDARG00000043492 (directed) ENSDARG00000074074	false	directed	ENSDARG00000043492 (directed) ENSDARG00000074074	0.0131609	family
rbms1a	1	irf1a	directed	ENSDARG00000043492 (directed) ENSDARG00000074023	false	directed	ENSDARG00000043492 (directed) ENSDARG00000074023	0.0252094	family
mctp2b	1	irf1a	directed	ENSDARG00000043492 (directed) ENSDARG00000073970	false	directed	ENSDARG00000043492 (directed) ENSDARG00000073970	0.0188419	family
adck2	1	irf1a	directed	ENSDARG00000043492 (directed) ENSDARG00000073923	false	directed	ENSDARG00000043492 (directed) ENSDARG00000073923	0.0230039	family
arhgef7b	1	irf1a	directed	ENSDARG00000043492 (directed) ENSDARG00000073848	false	directed	ENSDARG00000043492 (directed) ENSDARG00000073848	0.011425	family
zgc:194210	1	irf1a	directed	ENSDARG00000043492 (directed) ENSDARG00000073799	false	directed	ENSDARG00000043492 (directed) ENSDARG00000073799	0.0526793	family
sec24b	1	irf1a	directed	ENSDARG00000043492 (directed) ENSDARG00000071906	false	directed	ENSDARG00000043492 (directed) ENSDARG00000071906	0.02843	family
mydgf	1	irf1a	directed	ENSDARG00000043492 (directed) ENSDARG00000071679	false	directed	ENSDARG00000043492 (directed) ENSDARG00000071679	0.0208238	family
si:dkeyp-87e7.4	1	irf1a	directed	ENSDARG00000043492 (directed) ENSDARG00000071570	false	directed	ENSDARG00000043492 (directed) ENSDARG00000071570	0.0225848	family
zgc:152948	1	irf1a	directed	ENSDARG00000043492 (directed) ENSDARG00000071487	false	directed	ENSDARG00000043492 (directed) ENSDARG00000071487	0.0467644	family
arl6ip6	1	irf1a	directed	ENSDARG00000043492 (directed) ENSDARG00000071013	false	directed	ENSDARG00000043492 (directed) ENSDARG00000071013	0.0192704	family
pmvk	1	irf1a	directed	ENSDARG00000043492 (directed) ENSDARG00000070798	false	directed	ENSDARG00000043492 (directed) ENSDARG00000070798	0.0139208	family
jupa	1	irf1a	directed	ENSDARG00000043492 (directed) ENSDARG00000070787	false	directed	ENSDARG00000043492 (directed) ENSDARG00000070787	0.0374374	family
si:dkey-85p17.3	1	irf1a	directed	ENSDARG00000043492 (directed) ENSDARG00000070601	false	directed	ENSDARG00000043492 (directed) ENSDARG00000070601	0.051928	family
atad5a	1	irf1a	directed	ENSDARG00000043492 (directed) ENSDARG00000070568	false	directed	ENSDARG00000043492 (directed) ENSDARG00000070568	0.0771656	family
fip1l1b	1	irf1a	directed	ENSDARG00000043492 (directed) ENSDARG00000070431	false	directed	ENSDARG00000043492 (directed) ENSDARG00000070431	0.035054	family
si:dkey-261m9.19	1	irf1a	directed	ENSDARG00000043492 (directed) ENSDARG00000070254	false	directed	ENSDARG00000043492 (directed) ENSDARG00000070254	0.0778464	family
casc5	1	irf1a	directed	ENSDARG00000043492 (directed) ENSDARG00000070239	false	directed	ENSDARG00000043492 (directed) ENSDARG00000070239	0.0854749	family
rpp25l	1	irf1a	directed	ENSDARG00000043492 (directed) ENSDARG00000070131	false	directed	ENSDARG00000043492 (directed) ENSDARG00000070131	0.0270021	family
ptpn23a	1	irf1a	directed	ENSDARG00000043492 (directed) ENSDARG00000070124	false	directed	ENSDARG00000043492 (directed) ENSDARG00000070124	0.0598571	family
taf15	1	irf1a	directed	ENSDARG00000043492 (directed) ENSDARG00000070019	false	directed	ENSDARG00000043492 (directed) ENSDARG00000070019	0.116028	family
si:ch211-145b13.6	1	irf1a	directed	ENSDARG00000043492 (directed) ENSDARG00000069998	false	directed	ENSDARG00000043492 (directed) ENSDARG00000069998	0.0461966	family
cysltr2a	1	irf1a	directed	ENSDARG00000043492 (directed) ENSDARG00000069800	false	directed	ENSDARG00000043492 (directed) ENSDARG00000069800	0.0220913	family
foxi2	1	irf1a	directed	ENSDARG00000043492 (directed) ENSDARG00000069715	false	directed	ENSDARG00000043492 (directed) ENSDARG00000069715	0.0164024	family
pcgf6	1	irf1a	directed	ENSDARG00000043492 (directed) ENSDARG00000069681	false	directed	ENSDARG00000043492 (directed) ENSDARG00000069681	0.0572393	family
vegfc	1	irf1a	directed	ENSDARG00000043492 (directed) ENSDARG00000069640	false	directed	ENSDARG00000043492 (directed) ENSDARG00000069640	0.0163498	family
mus81	1	irf1a	directed	ENSDARG00000043492 (directed) ENSDARG00000069326	false	directed	ENSDARG00000043492 (directed) ENSDARG00000069326	0.0800739	family
pdia5	1	irf1a	directed	ENSDARG00000043492 (directed) ENSDARG00000069242	false	directed	ENSDARG00000043492 (directed) ENSDARG00000069242	0.0128409	family
aars	1	irf1a	directed	ENSDARG00000043492 (directed) ENSDARG00000069142	false	directed	ENSDARG00000043492 (directed) ENSDARG00000069142	0.0540875	family
masp1	1	irf1a	directed	ENSDARG00000043492 (directed) ENSDARG00000068726	false	directed	ENSDARG00000043492 (directed) ENSDARG00000068726	0.0418667	family
fam214b	1	irf1a	directed	ENSDARG00000043492 (directed) ENSDARG00000068650	false	directed	ENSDARG00000043492 (directed) ENSDARG00000068650	0.0442052	family
gucd1	1	irf1a	directed	ENSDARG00000043492 (directed) ENSDARG00000068438	false	directed	ENSDARG00000043492 (directed) ENSDARG00000068438	0.0211964	family
LOC100149117	1	irf1a	directed	ENSDARG00000043492 (directed) ENSDARG00000068417	false	directed	ENSDARG00000043492 (directed) ENSDARG00000068417	0.0721033	family
ENSDARG00000068082	1	irf1a	directed	ENSDARG00000043492 (directed) ENSDARG00000068082	false	directed	ENSDARG00000043492 (directed) ENSDARG00000068082	0.0167675	family
cdk12	1	irf1a	directed	ENSDARG00000043492 (directed) ENSDARG00000063726	false	directed	ENSDARG00000043492 (directed) ENSDARG00000063726	0.111375	family
rreb1a	1	irf1a	directed	ENSDARG00000043492 (directed) ENSDARG00000063701	false	directed	ENSDARG00000043492 (directed) ENSDARG00000063701	0.0475415	family
antxr1c	1	irf1a	directed	ENSDARG00000043492 (directed) ENSDARG00000063612	false	directed	ENSDARG00000043492 (directed) ENSDARG00000063612	0.0755269	family
sgk2a	1	irf1a	directed	ENSDARG00000043492 (directed) ENSDARG00000063370	false	directed	ENSDARG00000043492 (directed) ENSDARG00000063370	0.0385848	family
ppwd1	1	irf1a	directed	ENSDARG00000043492 (directed) ENSDARG00000063161	false	directed	ENSDARG00000043492 (directed) ENSDARG00000063161	0.00926997	family
ubn2a	1	irf1a	directed	ENSDARG00000043492 (directed) ENSDARG00000063062	false	directed	ENSDARG00000043492 (directed) ENSDARG00000063062	0.1042	family
tyw1	1	irf1a	directed	ENSDARG00000043492 (directed) ENSDARG00000062987	false	directed	ENSDARG00000043492 (directed) ENSDARG00000062987	0.038199	family
kmt2ba	1	irf1a	directed	ENSDARG00000043492 (directed) ENSDARG00000062962	false	directed	ENSDARG00000043492 (directed) ENSDARG00000062962	0.0913381	family
plekhg7	1	irf1a	directed	ENSDARG00000043492 (directed) ENSDARG00000062855	false	directed	ENSDARG00000043492 (directed) ENSDARG00000062855	0.0257289	family
rif1	1	irf1a	directed	ENSDARG00000043492 (directed) ENSDARG00000062650	false	directed	ENSDARG00000043492 (directed) ENSDARG00000062650	0.051379	family
zc3h18	1	irf1a	directed	ENSDARG00000043492 (directed) ENSDARG00000062506	false	directed	ENSDARG00000043492 (directed) ENSDARG00000062506	0.0476767	family
2008-03-01	1	irf1a	directed	ENSDARG00000043492 (directed) ENSDARG00000062489	false	directed	ENSDARG00000043492 (directed) ENSDARG00000062489	0.0447422	family
bcl2l13	1	irf1a	directed	ENSDARG00000043492 (directed) ENSDARG00000062370	false	directed	ENSDARG00000043492 (directed) ENSDARG00000062370	0.0181695	family
jarid2b	1	irf1a	directed	ENSDARG00000043492 (directed) ENSDARG00000062268	false	directed	ENSDARG00000043492 (directed) ENSDARG00000062268	0.115144	family
edc4	1	irf1a	directed	ENSDARG00000043492 (directed) ENSDARG00000062266	false	directed	ENSDARG00000043492 (directed) ENSDARG00000062266	0.0660059	family
setd2	1	irf1a	directed	ENSDARG00000043492 (directed) ENSDARG00000062244	false	directed	ENSDARG00000043492 (directed) ENSDARG00000062244	0.0812446	family
vrtn	1	irf1a	directed	ENSDARG00000043492 (directed) ENSDARG00000061963	false	directed	ENSDARG00000043492 (directed) ENSDARG00000061963	0.0519117	family
cnot2	1	irf1a	directed	ENSDARG00000043492 (directed) ENSDARG00000061802	false	directed	ENSDARG00000043492 (directed) ENSDARG00000061802	0.0359199	family
kdm6a	1	irf1a	directed	ENSDARG00000043492 (directed) ENSDARG00000061759	false	directed	ENSDARG00000043492 (directed) ENSDARG00000061759	0.0905394	family
LOC100333227	1	irf1a	directed	ENSDARG00000043492 (directed) ENSDARG00000061660	false	directed	ENSDARG00000043492 (directed) ENSDARG00000061660	0.0650087	family
ncaph	1	irf1a	directed	ENSDARG00000043492 (directed) ENSDARG00000061468	false	directed	ENSDARG00000043492 (directed) ENSDARG00000061468	0.100684	family
si:dkey-202e22.2	1	irf1a	directed	ENSDARG00000043492 (directed) ENSDARG00000061260	false	directed	ENSDARG00000043492 (directed) ENSDARG00000061260	0.0887274	family
gfod2	1	irf1a	directed	ENSDARG00000043492 (directed) ENSDARG00000061145	false	directed	ENSDARG00000043492 (directed) ENSDARG00000061145	0.0169392	family
nars	1	irf1a	directed	ENSDARG00000043492 (directed) ENSDARG00000061100	false	directed	ENSDARG00000043492 (directed) ENSDARG00000061100	0.048935	family
stk36	1	irf1a	directed	ENSDARG00000043492 (directed) ENSDARG00000061095	false	directed	ENSDARG00000043492 (directed) ENSDARG00000061095	0.00925586	family
nemp2	1	irf1a	directed	ENSDARG00000043492 (directed) ENSDARG00000061062	false	directed	ENSDARG00000043492 (directed) ENSDARG00000061062	0.0518756	family
rabggta	1	irf1a	directed	ENSDARG00000043492 (directed) ENSDARG00000061024	false	directed	ENSDARG00000043492 (directed) ENSDARG00000061024	0.0339854	family
spns2	1	irf1a	directed	ENSDARG00000043492 (directed) ENSDARG00000061017	false	directed	ENSDARG00000043492 (directed) ENSDARG00000061017	0.0505246	family
rpusd2	1	irf1a	directed	ENSDARG00000043492 (directed) ENSDARG00000060992	false	directed	ENSDARG00000043492 (directed) ENSDARG00000060992	0.0193204	family
atp2a3	1	irf1a	directed	ENSDARG00000043492 (directed) ENSDARG00000060978	false	directed	ENSDARG00000043492 (directed) ENSDARG00000060978	0.0331933	family
znf346	1	irf1a	directed	ENSDARG00000043492 (directed) ENSDARG00000060695	false	directed	ENSDARG00000043492 (directed) ENSDARG00000060695	0.0536904	family
klf8	59.616	irf1a	directed	ENSDARG00000043492 (directed) ENSDARG00000060661	false	directed	ENSDARG00000043492 (directed) ENSDARG00000060661	0.0796869	family
tmem229b	1	irf1a	directed	ENSDARG00000043492 (directed) ENSDARG00000060569	false	directed	ENSDARG00000043492 (directed) ENSDARG00000060569	0.0206282	family
atad2b	1	irf1a	directed	ENSDARG00000043492 (directed) ENSDARG00000060537	false	directed	ENSDARG00000043492 (directed) ENSDARG00000060537	0.0933308	family
eprs	1	irf1a	directed	ENSDARG00000043492 (directed) ENSDARG00000060494	false	directed	ENSDARG00000043492 (directed) ENSDARG00000060494	0.0477117	family
tbl1x	1	irf1a	directed	ENSDARG00000043492 (directed) ENSDARG00000060438	false	directed	ENSDARG00000043492 (directed) ENSDARG00000060438	0.0525931	family
mtfr2	1	irf1a	directed	ENSDARG00000043492 (directed) ENSDARG00000060394	false	directed	ENSDARG00000043492 (directed) ENSDARG00000060394	0.0497283	family
wdr62	1	irf1a	directed	ENSDARG00000043492 (directed) ENSDARG00000060312	false	directed	ENSDARG00000043492 (directed) ENSDARG00000060312	0.0280947	family
nin	1	irf1a	directed	ENSDARG00000043492 (directed) ENSDARG00000060298	false	directed	ENSDARG00000043492 (directed) ENSDARG00000060298	0.110109	family
crb2a	1	irf1a	directed	ENSDARG00000043492 (directed) ENSDARG00000060106	false	directed	ENSDARG00000043492 (directed) ENSDARG00000060106	0.0784463	family
btaf1	1	irf1a	directed	ENSDARG00000043492 (directed) ENSDARG00000060089	false	directed	ENSDARG00000043492 (directed) ENSDARG00000060089	0.0475451	family
papd5	1	irf1a	directed	ENSDARG00000043492 (directed) ENSDARG00000060071	false	directed	ENSDARG00000043492 (directed) ENSDARG00000060071	0.0239295	family
fam222ba	1	irf1a	directed	ENSDARG00000043492 (directed) ENSDARG00000059886	false	directed	ENSDARG00000043492 (directed) ENSDARG00000059886	0.0861798	family
nprl2	1	irf1a	directed	ENSDARG00000043492 (directed) ENSDARG00000059613	false	directed	ENSDARG00000043492 (directed) ENSDARG00000059613	0.0163064	family
wbscr16	1	irf1a	directed	ENSDARG00000043492 (directed) ENSDARG00000059583	false	directed	ENSDARG00000043492 (directed) ENSDARG00000059583	0.00594087	family
smtnb	1	irf1a	directed	ENSDARG00000043492 (directed) ENSDARG00000059442	false	directed	ENSDARG00000043492 (directed) ENSDARG00000059442	0.0502381	family
hnrnpl2	1	irf1a	directed	ENSDARG00000043492 (directed) ENSDARG00000059303	false	directed	ENSDARG00000043492 (directed) ENSDARG00000059303	0.0622356	family
si:ch211-248e11.2	1	irf1a	directed	ENSDARG00000043492 (directed) ENSDARG00000058940	false	directed	ENSDARG00000043492 (directed) ENSDARG00000058940	0.0294831	family
nhej1	1	irf1a	directed	ENSDARG00000043492 (directed) ENSDARG00000058893	false	directed	ENSDARG00000043492 (directed) ENSDARG00000058893	0.0163505	family
ncl1	1	irf1a	directed	ENSDARG00000043492 (directed) ENSDARG00000058861	false	directed	ENSDARG00000043492 (directed) ENSDARG00000058861	0.0253682	family
akirin2	1	irf1a	directed	ENSDARG00000043492 (directed) ENSDARG00000058729	false	directed	ENSDARG00000043492 (directed) ENSDARG00000058729	0.0339978	family
si:dkey-119f1.1	1	irf1a	directed	ENSDARG00000043492 (directed) ENSDARG00000058719	false	directed	ENSDARG00000043492 (directed) ENSDARG00000058719	0.024592	family
terf1	1	irf1a	directed	ENSDARG00000043492 (directed) ENSDARG00000058710	false	directed	ENSDARG00000043492 (directed) ENSDARG00000058710	0.0224451	family
dnajb2	1	irf1a	directed	ENSDARG00000043492 (directed) ENSDARG00000058644	false	directed	ENSDARG00000043492 (directed) ENSDARG00000058644	0.0351227	family
lama5	1	irf1a	directed	ENSDARG00000043492 (directed) ENSDARG00000058543	false	directed	ENSDARG00000043492 (directed) ENSDARG00000058543	0.0305547	family
ENSDARG00000058532	1	irf1a	directed	ENSDARG00000043492 (directed) ENSDARG00000058532	false	directed	ENSDARG00000043492 (directed) ENSDARG00000058532	0.0356064	family
sephs1	1	irf1a	directed	ENSDARG00000043492 (directed) ENSDARG00000058292	false	directed	ENSDARG00000043492 (directed) ENSDARG00000058292	0.0424181	family
b3gnt3	1	irf1a	directed	ENSDARG00000043492 (directed) ENSDARG00000058100	false	directed	ENSDARG00000043492 (directed) ENSDARG00000058100	0.019489	family
rprd2a	1	irf1a	directed	ENSDARG00000043492 (directed) ENSDARG00000058089	false	directed	ENSDARG00000043492 (directed) ENSDARG00000058089	0.101789	family
cep350	1	irf1a	directed	ENSDARG00000043492 (directed) ENSDARG00000058000	false	directed	ENSDARG00000043492 (directed) ENSDARG00000058000	0.0617965	family
ints8	1	irf1a	directed	ENSDARG00000043492 (directed) ENSDARG00000057986	false	directed	ENSDARG00000043492 (directed) ENSDARG00000057986	0.0982849	family
si:ch73-181d5.4	1	irf1a	directed	ENSDARG00000043492 (directed) ENSDARG00000057907	false	directed	ENSDARG00000043492 (directed) ENSDARG00000057907	0.0648972	family
dnmt3bb.2	1	irf1a	directed	ENSDARG00000043492 (directed) ENSDARG00000057830	false	directed	ENSDARG00000043492 (directed) ENSDARG00000057830	0.061265	family
lyz	1	irf1a	directed	ENSDARG00000043492 (directed) ENSDARG00000057789	false	directed	ENSDARG00000043492 (directed) ENSDARG00000057789	0.0583221	family
hells	1	irf1a	directed	ENSDARG00000043492 (directed) ENSDARG00000057738	false	directed	ENSDARG00000043492 (directed) ENSDARG00000057738	0.0534214	family
cxcr4a	1	irf1a	directed	ENSDARG00000043492 (directed) ENSDARG00000057633	false	directed	ENSDARG00000043492 (directed) ENSDARG00000057633	0.0552688	family
polr3c	1	irf1a	directed	ENSDARG00000043492 (directed) ENSDARG00000057562	false	directed	ENSDARG00000043492 (directed) ENSDARG00000057562	0.0364193	family
srsf2a	1	irf1a	directed	ENSDARG00000043492 (directed) ENSDARG00000057484	false	directed	ENSDARG00000043492 (directed) ENSDARG00000057484	0.106023	family
emc1	1	irf1a	directed	ENSDARG00000043492 (directed) ENSDARG00000057255	false	directed	ENSDARG00000043492 (directed) ENSDARG00000057255	0.0697191	family
prep	1	irf1a	directed	ENSDARG00000043492 (directed) ENSDARG00000057151	false	directed	ENSDARG00000043492 (directed) ENSDARG00000057151	0.0605698	family
hpf1	1	irf1a	directed	ENSDARG00000043492 (directed) ENSDARG00000057114	false	directed	ENSDARG00000043492 (directed) ENSDARG00000057114	0.0311396	family
rad9a	1	irf1a	directed	ENSDARG00000043492 (directed) ENSDARG00000056984	false	directed	ENSDARG00000043492 (directed) ENSDARG00000056984	0.0574297	family
pcolcea	1	irf1a	directed	ENSDARG00000043492 (directed) ENSDARG00000056913	false	directed	ENSDARG00000043492 (directed) ENSDARG00000056913	0.0252163	family
zgc:113276	1	irf1a	directed	ENSDARG00000043492 (directed) ENSDARG00000056650	false	directed	ENSDARG00000043492 (directed) ENSDARG00000056650	0.0230336	family
copb1	1	irf1a	directed	ENSDARG00000043492 (directed) ENSDARG00000056557	false	directed	ENSDARG00000043492 (directed) ENSDARG00000056557	0.0181816	family
pdik1l	1	irf1a	directed	ENSDARG00000043492 (directed) ENSDARG00000056509	false	directed	ENSDARG00000043492 (directed) ENSDARG00000056509	0.0664564	family
trnau1apb	1	irf1a	directed	ENSDARG00000043492 (directed) ENSDARG00000056475	false	directed	ENSDARG00000043492 (directed) ENSDARG00000056475	0.0726628	family
chaf1b	1	irf1a	directed	ENSDARG00000043492 (directed) ENSDARG00000056473	false	directed	ENSDARG00000043492 (directed) ENSDARG00000056473	0.0232614	family
myct1a	1	irf1a	directed	ENSDARG00000043492 (directed) ENSDARG00000056125	false	directed	ENSDARG00000043492 (directed) ENSDARG00000056125	0.0322088	family
hoxb9a	123.91	irf1a	directed	ENSDARG00000043492 (directed) ENSDARG00000056023	false	directed	ENSDARG00000043492 (directed) ENSDARG00000056023	0.0590475	family
nipa2	1	irf1a	directed	ENSDARG00000043492 (directed) ENSDARG00000055912	false	directed	ENSDARG00000043492 (directed) ENSDARG00000055912	0.0105838	family
mastl	1	irf1a	directed	ENSDARG00000043492 (directed) ENSDARG00000055566	false	directed	ENSDARG00000043492 (directed) ENSDARG00000055566	0.0495455	family
si:ch73-1a9.4	1	irf1a	directed	ENSDARG00000043492 (directed) ENSDARG00000055339	false	directed	ENSDARG00000043492 (directed) ENSDARG00000055339	0.0143982	family
fancc	1	irf1a	directed	ENSDARG00000043492 (directed) ENSDARG00000055232	false	directed	ENSDARG00000043492 (directed) ENSDARG00000055232	0.0281627	family
ccnl1a	1	irf1a	directed	ENSDARG00000043492 (directed) ENSDARG00000055124	false	directed	ENSDARG00000043492 (directed) ENSDARG00000055124	0.0389987	family
cxcl12b	1	irf1a	directed	ENSDARG00000043492 (directed) ENSDARG00000055100	false	directed	ENSDARG00000043492 (directed) ENSDARG00000055100	0.101151	family
nxf1	1	irf1a	directed	ENSDARG00000043492 (directed) ENSDARG00000055076	false	directed	ENSDARG00000043492 (directed) ENSDARG00000055076	0.0677179	family
pds5a	1	irf1a	directed	ENSDARG00000043492 (directed) ENSDARG00000055022	false	directed	ENSDARG00000043492 (directed) ENSDARG00000055022	0.0841034	family
uggt1	1	irf1a	directed	ENSDARG00000043492 (directed) ENSDARG00000054746	false	directed	ENSDARG00000043492 (directed) ENSDARG00000054746	0.0506245	family
fli1a	1	irf1a	directed	ENSDARG00000043492 (directed) ENSDARG00000054632	false	directed	ENSDARG00000043492 (directed) ENSDARG00000054632	0.0718113	family
smg1	1	irf1a	directed	ENSDARG00000043492 (directed) ENSDARG00000054570	false	directed	ENSDARG00000043492 (directed) ENSDARG00000054570	0.0697346	family
araf	1	irf1a	directed	ENSDARG00000043492 (directed) ENSDARG00000054533	false	directed	ENSDARG00000043492 (directed) ENSDARG00000054533	0.0387122	family
ccdc43	1	irf1a	directed	ENSDARG00000043492 (directed) ENSDARG00000054446	false	directed	ENSDARG00000043492 (directed) ENSDARG00000054446	0.0258732	family
ssuh2.2	1	irf1a	directed	ENSDARG00000043492 (directed) ENSDARG00000054418	false	directed	ENSDARG00000043492 (directed) ENSDARG00000054418	0.0756553	family
ap2a1	1	irf1a	directed	ENSDARG00000043492 (directed) ENSDARG00000054320	false	directed	ENSDARG00000043492 (directed) ENSDARG00000054320	0.0857837	family
ENSDARG00000054201	1	irf1a	directed	ENSDARG00000043492 (directed) ENSDARG00000054201	false	directed	ENSDARG00000043492 (directed) ENSDARG00000054201	0.0300685	family
angpt2b	1	irf1a	directed	ENSDARG00000043492 (directed) ENSDARG00000053906	false	directed	ENSDARG00000043492 (directed) ENSDARG00000053906	0.0332326	family
med13a	1	irf1a	directed	ENSDARG00000043492 (directed) ENSDARG00000053884	false	directed	ENSDARG00000043492 (directed) ENSDARG00000053884	0.0787095	family
plekhh1	1	irf1a	directed	ENSDARG00000043492 (directed) ENSDARG00000053835	false	directed	ENSDARG00000043492 (directed) ENSDARG00000053835	0.0783099	family
LOC103908606	1	irf1a	directed	ENSDARG00000043492 (directed) ENSDARG00000053800	false	directed	ENSDARG00000043492 (directed) ENSDARG00000053800	0.0845648	family
ccdc88c	1	irf1a	directed	ENSDARG00000043492 (directed) ENSDARG00000053713	false	directed	ENSDARG00000043492 (directed) ENSDARG00000053713	0.0682252	family
gtpbp1	1	irf1a	directed	ENSDARG00000043492 (directed) ENSDARG00000053467	false	directed	ENSDARG00000043492 (directed) ENSDARG00000053467	0.0923587	family
ppp4r2b	1	irf1a	directed	ENSDARG00000043492 (directed) ENSDARG00000053447	false	directed	ENSDARG00000043492 (directed) ENSDARG00000053447	0.0165705	family
dis3l	1	irf1a	directed	ENSDARG00000043492 (directed) ENSDARG00000053200	false	directed	ENSDARG00000043492 (directed) ENSDARG00000053200	0.0510522	family
cep44	1	irf1a	directed	ENSDARG00000043492 (directed) ENSDARG00000053106	false	directed	ENSDARG00000043492 (directed) ENSDARG00000053106	0.0254404	family
tubb1	1	irf1a	directed	ENSDARG00000043492 (directed) ENSDARG00000053066	false	directed	ENSDARG00000043492 (directed) ENSDARG00000053066	0.0745911	family
bcl7a	1	irf1a	directed	ENSDARG00000043492 (directed) ENSDARG00000052907	false	directed	ENSDARG00000043492 (directed) ENSDARG00000052907	0.0768546	family
tia1	1	irf1a	directed	ENSDARG00000043492 (directed) ENSDARG00000052536	false	directed	ENSDARG00000043492 (directed) ENSDARG00000052536	0.0755449	family
dnmt3ba	1	irf1a	directed	ENSDARG00000043492 (directed) ENSDARG00000052402	false	directed	ENSDARG00000043492 (directed) ENSDARG00000052402	0.0754649	family
trim35-3	1	irf1a	directed	ENSDARG00000043492 (directed) ENSDARG00000052255	false	directed	ENSDARG00000043492 (directed) ENSDARG00000052255	0.0192224	family
notch1b	1	irf1a	directed	ENSDARG00000043492 (directed) ENSDARG00000052094	false	directed	ENSDARG00000043492 (directed) ENSDARG00000052094	0.0810935	family
cabp2a	1	irf1a	directed	ENSDARG00000043492 (directed) ENSDARG00000052016	false	directed	ENSDARG00000043492 (directed) ENSDARG00000052016	0.0141383	family
zgc:110434	1	irf1a	directed	ENSDARG00000043492 (directed) ENSDARG00000051775	false	directed	ENSDARG00000043492 (directed) ENSDARG00000051775	0.0541475	family
fhod1	1	irf1a	directed	ENSDARG00000043492 (directed) ENSDARG00000051768	false	directed	ENSDARG00000043492 (directed) ENSDARG00000051768	0.0322775	family
zgc:77838	1	irf1a	directed	ENSDARG00000043492 (directed) ENSDARG00000046071	false	directed	ENSDARG00000043492 (directed) ENSDARG00000046071	0.0656425	family
zgc:162634	1	irf1a	directed	ENSDARG00000043492 (directed) ENSDARG00000045773	false	directed	ENSDARG00000043492 (directed) ENSDARG00000045773	0.0130856	family
usp3	1	irf1a	directed	ENSDARG00000043492 (directed) ENSDARG00000045641	false	directed	ENSDARG00000043492 (directed) ENSDARG00000045641	0.0648711	family
pawr	1	irf1a	directed	ENSDARG00000043492 (directed) ENSDARG00000045486	false	directed	ENSDARG00000043492 (directed) ENSDARG00000045486	0.00960234	family
mllt10	1	irf1a	directed	ENSDARG00000043492 (directed) ENSDARG00000045401	false	directed	ENSDARG00000043492 (directed) ENSDARG00000045401	0.114941	family
pabpn1	1	irf1a	directed	ENSDARG00000043492 (directed) ENSDARG00000045373	false	directed	ENSDARG00000043492 (directed) ENSDARG00000045373	0.0368628	family
si:dkey-222b8.1	159.937	irf1a	directed	ENSDARG00000043492 (directed) ENSDARG00000045094	false	directed	ENSDARG00000043492 (directed) ENSDARG00000045094	0.100392	family
dhrs3b	1	irf1a	directed	ENSDARG00000043492 (directed) ENSDARG00000044803	false	directed	ENSDARG00000043492 (directed) ENSDARG00000044803	0.0364851	family
pou5f3	46.0306	irf1a	directed	ENSDARG00000043492 (directed) ENSDARG00000044774	false	directed	ENSDARG00000043492 (directed) ENSDARG00000044774	0.0196708	family
rps6ka4	1	irf1a	directed	ENSDARG00000043492 (directed) ENSDARG00000044436	false	directed	ENSDARG00000043492 (directed) ENSDARG00000044436	0.0256492	family
rbmx2	1	irf1a	directed	ENSDARG00000043492 (directed) ENSDARG00000044380	false	directed	ENSDARG00000043492 (directed) ENSDARG00000044380	0.0236928	family
zranb2	1	irf1a	directed	ENSDARG00000043492 (directed) ENSDARG00000044332	false	directed	ENSDARG00000043492 (directed) ENSDARG00000044332	0.0332135	family
smc5	1	irf1a	directed	ENSDARG00000043492 (directed) ENSDARG00000044282	false	directed	ENSDARG00000043492 (directed) ENSDARG00000044282	0.0142496	family
wapla	1	irf1a	directed	ENSDARG00000043492 (directed) ENSDARG00000044144	false	directed	ENSDARG00000043492 (directed) ENSDARG00000044144	0.0345457	family
arid4a	1	irf1a	directed	ENSDARG00000043492 (directed) ENSDARG00000043873	false	directed	ENSDARG00000043492 (directed) ENSDARG00000043873	0.111115	family
cldn5a	1	irf1a	directed	ENSDARG00000043492 (directed) ENSDARG00000043716	false	directed	ENSDARG00000043492 (directed) ENSDARG00000043716	0.0579126	family
asf1bb	1	irf1a	directed	ENSDARG00000043492 (directed) ENSDARG00000043713	false	directed	ENSDARG00000043492 (directed) ENSDARG00000043713	0.0469497	family
cenpn	1	irf1a	directed	ENSDARG00000043492 (directed) ENSDARG00000043640	false	directed	ENSDARG00000043492 (directed) ENSDARG00000043640	0.0210229	family
atg4da	1	irf1a	directed	ENSDARG00000043492 (directed) ENSDARG00000043548	false	directed	ENSDARG00000043492 (directed) ENSDARG00000043548	0.0195351	family
si:dkey-86e18.1	1	irf1a	directed	ENSDARG00000043492 (directed) ENSDARG00000043536	false	directed	ENSDARG00000043492 (directed) ENSDARG00000043536	0.013609	family
gtf3c3	1	irf1a	directed	ENSDARG00000043492 (directed) ENSDARG00000043247	false	directed	ENSDARG00000043492 (directed) ENSDARG00000043247	0.0215493	family
blf	1	irf1a	directed	ENSDARG00000043492 (directed) ENSDARG00000043126	false	directed	ENSDARG00000043492 (directed) ENSDARG00000043126	0.0853447	family
si:dkeyp-84f3.5	1	irf1a	directed	ENSDARG00000043492 (directed) ENSDARG00000042989	false	directed	ENSDARG00000043492 (directed) ENSDARG00000042989	0.0267675	family
plaa	1	irf1a	directed	ENSDARG00000043492 (directed) ENSDARG00000042728	false	directed	ENSDARG00000043492 (directed) ENSDARG00000042728	0.0561478	family
tert	1	irf1a	directed	ENSDARG00000043492 (directed) ENSDARG00000042637	false	directed	ENSDARG00000043492 (directed) ENSDARG00000042637	0.0368544	family
lpar2b	1	irf1a	directed	ENSDARG00000043492 (directed) ENSDARG00000042561	false	directed	ENSDARG00000043492 (directed) ENSDARG00000042561	0.0123044	family
nup205	1	irf1a	directed	ENSDARG00000043492 (directed) ENSDARG00000042530	false	directed	ENSDARG00000043492 (directed) ENSDARG00000042530	0.047324	family
unga	1	irf1a	directed	ENSDARG00000043492 (directed) ENSDARG00000042527	false	directed	ENSDARG00000043492 (directed) ENSDARG00000042527	0.0397458	family
ENSDARG00000042508	1	irf1a	directed	ENSDARG00000043492 (directed) ENSDARG00000042508	false	directed	ENSDARG00000043492 (directed) ENSDARG00000042508	0.0498525	family
smek1	1	irf1a	directed	ENSDARG00000043492 (directed) ENSDARG00000042187	false	directed	ENSDARG00000043492 (directed) ENSDARG00000042187	0.119085	family
eef2a.1	1	irf1a	directed	ENSDARG00000043492 (directed) ENSDARG00000042094	false	directed	ENSDARG00000043492 (directed) ENSDARG00000042094	0.046088	family
fam129aa	1	irf1a	directed	ENSDARG00000043492 (directed) ENSDARG00000042055	false	directed	ENSDARG00000043492 (directed) ENSDARG00000042055	0.00945621	family
kpna5	1	irf1a	directed	ENSDARG00000043492 (directed) ENSDARG00000042030	false	directed	ENSDARG00000043492 (directed) ENSDARG00000042030	0.0102245	family
si:ch211-63o20.7	1	irf1a	directed	ENSDARG00000043492 (directed) ENSDARG00000042000	false	directed	ENSDARG00000043492 (directed) ENSDARG00000042000	0.043554	family
znf512	1	irf1a	directed	ENSDARG00000043492 (directed) ENSDARG00000041910	false	directed	ENSDARG00000043492 (directed) ENSDARG00000041910	0.0106428	family
usp39	1	irf1a	directed	ENSDARG00000043492 (directed) ENSDARG00000041908	false	directed	ENSDARG00000043492 (directed) ENSDARG00000041908	0.0375821	family
zgc:55461	1	irf1a	directed	ENSDARG00000043492 (directed) ENSDARG00000041723	false	directed	ENSDARG00000043492 (directed) ENSDARG00000041723	0.0448947	family
zc3h14	1	irf1a	directed	ENSDARG00000043492 (directed) ENSDARG00000041402	false	directed	ENSDARG00000043492 (directed) ENSDARG00000041402	0.0174013	family
mrpl51	1	irf1a	directed	ENSDARG00000043492 (directed) ENSDARG00000041340	false	directed	ENSDARG00000043492 (directed) ENSDARG00000041340	0.0266235	family
setdb1a	1	irf1a	directed	ENSDARG00000043492 (directed) ENSDARG00000041243	false	directed	ENSDARG00000043492 (directed) ENSDARG00000041243	0.0992817	family
st3gal4	1	irf1a	directed	ENSDARG00000043492 (directed) ENSDARG00000041006	false	directed	ENSDARG00000043492 (directed) ENSDARG00000041006	0.00836928	family
nr2f2	123.964	irf1a	directed	ENSDARG00000043492 (directed) ENSDARG00000040926	false	directed	ENSDARG00000043492 (directed) ENSDARG00000040926	0.0660745	family
prickle1a	1	irf1a	directed	ENSDARG00000043492 (directed) ENSDARG00000040649	false	directed	ENSDARG00000043492 (directed) ENSDARG00000040649	0.0725524	family
hvcn1	1	irf1a	directed	ENSDARG00000043492 (directed) ENSDARG00000040338	false	directed	ENSDARG00000043492 (directed) ENSDARG00000040338	0.0186909	family
nbn	1	irf1a	directed	ENSDARG00000043492 (directed) ENSDARG00000040303	false	directed	ENSDARG00000043492 (directed) ENSDARG00000040303	0.019569	family
kif20bb	1	irf1a	directed	ENSDARG00000043492 (directed) ENSDARG00000040110	false	directed	ENSDARG00000043492 (directed) ENSDARG00000040110	0.0806744	family
zbtb48	1	irf1a	directed	ENSDARG00000043492 (directed) ENSDARG00000039263	false	directed	ENSDARG00000043492 (directed) ENSDARG00000039263	0.0588899	family
vps13a	1	irf1a	directed	ENSDARG00000043492 (directed) ENSDARG00000039225	false	directed	ENSDARG00000043492 (directed) ENSDARG00000039225	0.0133207	family
cenpl	1	irf1a	directed	ENSDARG00000043492 (directed) ENSDARG00000038802	false	directed	ENSDARG00000043492 (directed) ENSDARG00000038802	0.0211069	family
elavl1	1	irf1a	directed	ENSDARG00000043492 (directed) ENSDARG00000038695	false	directed	ENSDARG00000043492 (directed) ENSDARG00000038695	0.0601869	family
gdf3	1	irf1a	directed	ENSDARG00000043492 (directed) ENSDARG00000037995	false	directed	ENSDARG00000043492 (directed) ENSDARG00000037995	0.0384428	family
srrm2	1	irf1a	directed	ENSDARG00000043492 (directed) ENSDARG00000037965	false	directed	ENSDARG00000043492 (directed) ENSDARG00000037965	0.0683622	family
zgc:56409	1	irf1a	directed	ENSDARG00000043492 (directed) ENSDARG00000037652	false	directed	ENSDARG00000043492 (directed) ENSDARG00000037652	0.0262442	family
tbc1d10c	1	irf1a	directed	ENSDARG00000043492 (directed) ENSDARG00000037408	false	directed	ENSDARG00000043492 (directed) ENSDARG00000037408	0.0340966	family
toporsa	1	irf1a	directed	ENSDARG00000043492 (directed) ENSDARG00000037260	false	directed	ENSDARG00000043492 (directed) ENSDARG00000037260	0.0231641	family
trmo	1	irf1a	directed	ENSDARG00000043492 (directed) ENSDARG00000037245	false	directed	ENSDARG00000043492 (directed) ENSDARG00000037245	0.0101548	family
ENSDARG00000037060	1	irf1a	directed	ENSDARG00000043492 (directed) ENSDARG00000037060	false	directed	ENSDARG00000043492 (directed) ENSDARG00000037060	0.090433	family
ube4b	1	irf1a	directed	ENSDARG00000043492 (directed) ENSDARG00000037017	false	directed	ENSDARG00000043492 (directed) ENSDARG00000037017	0.0497634	family
has2	1	irf1a	directed	ENSDARG00000043492 (directed) ENSDARG00000036987	false	directed	ENSDARG00000043492 (directed) ENSDARG00000036987	0.0616184	family
hsd3b7	1	irf1a	directed	ENSDARG00000043492 (directed) ENSDARG00000036966	false	directed	ENSDARG00000043492 (directed) ENSDARG00000036966	0.0112519	family
rgs12b	1	irf1a	directed	ENSDARG00000043492 (directed) ENSDARG00000036774	false	directed	ENSDARG00000043492 (directed) ENSDARG00000036774	0.0185499	family
tomm40l	1	irf1a	directed	ENSDARG00000043492 (directed) ENSDARG00000036721	false	directed	ENSDARG00000043492 (directed) ENSDARG00000036721	0.0222736	family
bcl9	1	irf1a	directed	ENSDARG00000043492 (directed) ENSDARG00000036687	false	directed	ENSDARG00000043492 (directed) ENSDARG00000036687	0.0796698	family
aplnrb	1	irf1a	directed	ENSDARG00000043492 (directed) ENSDARG00000036670	false	directed	ENSDARG00000043492 (directed) ENSDARG00000036670	0.0671478	family
gpr182	1	irf1a	directed	ENSDARG00000043492 (directed) ENSDARG00000036616	false	directed	ENSDARG00000043492 (directed) ENSDARG00000036616	0.0621683	family
cmtr2	1	irf1a	directed	ENSDARG00000043492 (directed) ENSDARG00000036345	false	directed	ENSDARG00000043492 (directed) ENSDARG00000036345	0.0210875	family
eya3	1	irf1a	directed	ENSDARG00000043492 (directed) ENSDARG00000036100	false	directed	ENSDARG00000043492 (directed) ENSDARG00000036100	0.0789132	family
ctdnep1b	1	irf1a	directed	ENSDARG00000043492 (directed) ENSDARG00000035781	false	directed	ENSDARG00000043492 (directed) ENSDARG00000035781	0.0284993	family
si:ch1073-157b13.1	1	irf1a	directed	ENSDARG00000043492 (directed) ENSDARG00000035771	false	directed	ENSDARG00000043492 (directed) ENSDARG00000035771	0.0195459	family
zgc:101664	1	irf1a	directed	ENSDARG00000043492 (directed) ENSDARG00000035700	false	directed	ENSDARG00000043492 (directed) ENSDARG00000035700	0.0321043	family
si:ch211-193k19.1	1	irf1a	directed	ENSDARG00000043492 (directed) ENSDARG00000035660	false	directed	ENSDARG00000043492 (directed) ENSDARG00000035660	0.0230692	family
nelfb	1	irf1a	directed	ENSDARG00000043492 (directed) ENSDARG00000035505	false	directed	ENSDARG00000043492 (directed) ENSDARG00000035505	0.0548146	family
mis18a	1	irf1a	directed	ENSDARG00000043492 (directed) ENSDARG00000035333	false	directed	ENSDARG00000043492 (directed) ENSDARG00000035333	0.022331	family
srsf7a	1	irf1a	directed	ENSDARG00000043492 (directed) ENSDARG00000035325	false	directed	ENSDARG00000043492 (directed) ENSDARG00000035325	0.066777	family
hnrpl	1	irf1a	directed	ENSDARG00000043492 (directed) ENSDARG00000035324	false	directed	ENSDARG00000043492 (directed) ENSDARG00000035324	0.0768174	family
ubtf	1	irf1a	directed	ENSDARG00000043492 (directed) ENSDARG00000035066	false	directed	ENSDARG00000043492 (directed) ENSDARG00000035066	0.060301	family
ncapd3	1	irf1a	directed	ENSDARG00000043492 (directed) ENSDARG00000034773	false	directed	ENSDARG00000043492 (directed) ENSDARG00000034773	0.0781802	family
unc119a	1	irf1a	directed	ENSDARG00000043492 (directed) ENSDARG00000034453	false	directed	ENSDARG00000043492 (directed) ENSDARG00000034453	0.0331612	family
slit3	1	irf1a	directed	ENSDARG00000043492 (directed) ENSDARG00000034268	false	directed	ENSDARG00000043492 (directed) ENSDARG00000034268	0.0877195	family
si:dkey-243i1.1	1	irf1a	directed	ENSDARG00000043492 (directed) ENSDARG00000034227	false	directed	ENSDARG00000043492 (directed) ENSDARG00000034227	0.0721059	family
slc4a1ap	1	irf1a	directed	ENSDARG00000043492 (directed) ENSDARG00000034160	false	directed	ENSDARG00000043492 (directed) ENSDARG00000034160	0.00725591	family
mad1l1	1	irf1a	directed	ENSDARG00000043492 (directed) ENSDARG00000033852	false	directed	ENSDARG00000043492 (directed) ENSDARG00000033852	0.0601379	family
mtrf1	1	irf1a	directed	ENSDARG00000043492 (directed) ENSDARG00000033579	false	directed	ENSDARG00000043492 (directed) ENSDARG00000033579	0.0164804	family
dtx2	1	irf1a	directed	ENSDARG00000043492 (directed) ENSDARG00000032933	false	directed	ENSDARG00000043492 (directed) ENSDARG00000032933	0.0886542	family
anapc4	1	irf1a	directed	ENSDARG00000043492 (directed) ENSDARG00000032237	false	directed	ENSDARG00000043492 (directed) ENSDARG00000032237	0.0304806	family
phactr4b	1	irf1a	directed	ENSDARG00000043492 (directed) ENSDARG00000032221	false	directed	ENSDARG00000043492 (directed) ENSDARG00000032221	0.0859673	family
ptbp1b	1	irf1a	directed	ENSDARG00000043492 (directed) ENSDARG00000031907	false	directed	ENSDARG00000043492 (directed) ENSDARG00000031907	0.0875121	family
ube2s	1	irf1a	directed	ENSDARG00000043492 (directed) ENSDARG00000031775	false	directed	ENSDARG00000043492 (directed) ENSDARG00000031775	0.0622937	family
smad6b	157.338	irf1a	directed	ENSDARG00000043492 (directed) ENSDARG00000031763	false	directed	ENSDARG00000043492 (directed) ENSDARG00000031763	0.0321016	family
npr1a	1	irf1a	directed	ENSDARG00000043492 (directed) ENSDARG00000031751	false	directed	ENSDARG00000043492 (directed) ENSDARG00000031751	0.0433242	family
podxl	1	irf1a	directed	ENSDARG00000043492 (directed) ENSDARG00000031228	false	directed	ENSDARG00000043492 (directed) ENSDARG00000031228	0.0353921	family
tmem127	1	irf1a	directed	ENSDARG00000043492 (directed) ENSDARG00000030981	false	directed	ENSDARG00000043492 (directed) ENSDARG00000030981	0.0302173	family
melk	1	irf1a	directed	ENSDARG00000043492 (directed) ENSDARG00000030759	false	directed	ENSDARG00000043492 (directed) ENSDARG00000030759	0.0564334	family
plekhm3	1	irf1a	directed	ENSDARG00000043492 (directed) ENSDARG00000030633	false	directed	ENSDARG00000043492 (directed) ENSDARG00000030633	0.0503912	family
zc3h10	1	irf1a	directed	ENSDARG00000043492 (directed) ENSDARG00000030335	false	directed	ENSDARG00000043492 (directed) ENSDARG00000030335	0.036336	family
parpbp	1	irf1a	directed	ENSDARG00000043492 (directed) ENSDARG00000029944	false	directed	ENSDARG00000043492 (directed) ENSDARG00000029944	0.0334626	family
atp13a1	1	irf1a	directed	ENSDARG00000043492 (directed) ENSDARG00000029931	false	directed	ENSDARG00000043492 (directed) ENSDARG00000029931	0.0109912	family
fbxo3	1	irf1a	directed	ENSDARG00000043492 (directed) ENSDARG00000029242	false	directed	ENSDARG00000043492 (directed) ENSDARG00000029242	0.0299065	family
med23	1	irf1a	directed	ENSDARG00000043492 (directed) ENSDARG00000029157	false	directed	ENSDARG00000043492 (directed) ENSDARG00000029157	0.0847138	family
rbbp4	1	irf1a	directed	ENSDARG00000043492 (directed) ENSDARG00000029058	false	directed	ENSDARG00000043492 (directed) ENSDARG00000029058	0.0624443	family
lsm12a	1	irf1a	directed	ENSDARG00000043492 (directed) ENSDARG00000028848	false	directed	ENSDARG00000043492 (directed) ENSDARG00000028848	0.0124499	family
tek	1	irf1a	directed	ENSDARG00000043492 (directed) ENSDARG00000028663	false	directed	ENSDARG00000043492 (directed) ENSDARG00000028663	0.0332037	family
mapkapk5	1	irf1a	directed	ENSDARG00000043492 (directed) ENSDARG00000028082	false	directed	ENSDARG00000043492 (directed) ENSDARG00000028082	0.00923938	family
nrp1b	1	irf1a	directed	ENSDARG00000043492 (directed) ENSDARG00000027290	false	directed	ENSDARG00000043492 (directed) ENSDARG00000027290	0.0451989	family
nup160	1	irf1a	directed	ENSDARG00000043492 (directed) ENSDARG00000027140	false	directed	ENSDARG00000043492 (directed) ENSDARG00000027140	0.0633827	family
tbc1d22b	1	irf1a	directed	ENSDARG00000043492 (directed) ENSDARG00000026988	false	directed	ENSDARG00000043492 (directed) ENSDARG00000026988	0.0381248	family
rexo1	1	irf1a	directed	ENSDARG00000043492 (directed) ENSDARG00000026986	false	directed	ENSDARG00000043492 (directed) ENSDARG00000026986	0.044436	family
slc25a32b	1	irf1a	directed	ENSDARG00000043492 (directed) ENSDARG00000026835	false	directed	ENSDARG00000043492 (directed) ENSDARG00000026835	0.0235087	family
gmds	1	irf1a	directed	ENSDARG00000043492 (directed) ENSDARG00000026629	false	directed	ENSDARG00000043492 (directed) ENSDARG00000026629	0.0137676	family
rad51d	1	irf1a	directed	ENSDARG00000043492 (directed) ENSDARG00000026400	false	directed	ENSDARG00000043492 (directed) ENSDARG00000026400	0.00987166	family
arhgap29a	1	irf1a	directed	ENSDARG00000043492 (directed) ENSDARG00000026329	false	directed	ENSDARG00000043492 (directed) ENSDARG00000026329	0.053933	family
whsc1	1	irf1a	directed	ENSDARG00000043492 (directed) ENSDARG00000026225	false	directed	ENSDARG00000043492 (directed) ENSDARG00000026225	0.0900769	family
prpf8	1	irf1a	directed	ENSDARG00000043492 (directed) ENSDARG00000026180	false	directed	ENSDARG00000043492 (directed) ENSDARG00000026180	0.108579	family
plekhg5a	1	irf1a	directed	ENSDARG00000043492 (directed) ENSDARG00000025902	false	directed	ENSDARG00000043492 (directed) ENSDARG00000025902	0.0272836	family
myl12.2	1	irf1a	directed	ENSDARG00000043492 (directed) ENSDARG00000025326	false	directed	ENSDARG00000043492 (directed) ENSDARG00000025326	0.0344915	family
znf668	1	irf1a	directed	ENSDARG00000043492 (directed) ENSDARG00000025226	false	directed	ENSDARG00000043492 (directed) ENSDARG00000025226	0.0188744	family
pane1	1	irf1a	directed	ENSDARG00000043492 (directed) ENSDARG00000024681	false	directed	ENSDARG00000043492 (directed) ENSDARG00000024681	0.0264207	family
pip5k1ab	1	irf1a	directed	ENSDARG00000043492 (directed) ENSDARG00000024642	false	directed	ENSDARG00000043492 (directed) ENSDARG00000024642	0.0353162	family
nsl1	1	irf1a	directed	ENSDARG00000043492 (directed) ENSDARG00000024471	false	directed	ENSDARG00000043492 (directed) ENSDARG00000024471	0.0641689	family
adra1d	1	irf1a	directed	ENSDARG00000043492 (directed) ENSDARG00000024101	false	directed	ENSDARG00000043492 (directed) ENSDARG00000024101	0.0498231	family
heatr5a	1	irf1a	directed	ENSDARG00000043492 (directed) ENSDARG00000023999	false	directed	ENSDARG00000043492 (directed) ENSDARG00000023999	0.0369383	family
dyrk1ab	1	irf1a	directed	ENSDARG00000043492 (directed) ENSDARG00000023814	false	directed	ENSDARG00000043492 (directed) ENSDARG00000023814	0.0861988	family
eogt	1	irf1a	directed	ENSDARG00000043492 (directed) ENSDARG00000022853	false	directed	ENSDARG00000043492 (directed) ENSDARG00000022853	0.0830527	family
ntmt1	1	irf1a	directed	ENSDARG00000043492 (directed) ENSDARG00000022399	false	directed	ENSDARG00000043492 (directed) ENSDARG00000022399	0.0529237	family
rbm4.3	1	irf1a	directed	ENSDARG00000043492 (directed) ENSDARG00000022129	false	directed	ENSDARG00000043492 (directed) ENSDARG00000022129	0.094389	family
si:dkey-256h2.1	1	irf1a	directed	ENSDARG00000043492 (directed) ENSDARG00000021849	false	directed	ENSDARG00000043492 (directed) ENSDARG00000021849	0.0157936	family
cherp	1	irf1a	directed	ENSDARG00000043492 (directed) ENSDARG00000021812	false	directed	ENSDARG00000043492 (directed) ENSDARG00000021812	0.0572026	family
tab2	1	irf1a	directed	ENSDARG00000043492 (directed) ENSDARG00000021509	false	directed	ENSDARG00000043492 (directed) ENSDARG00000021509	0.0720281	family
mcm3ap	1	irf1a	directed	ENSDARG00000043492 (directed) ENSDARG00000021402	false	directed	ENSDARG00000043492 (directed) ENSDARG00000021402	0.102536	family
ndc1	1	irf1a	directed	ENSDARG00000043492 (directed) ENSDARG00000021120	false	directed	ENSDARG00000043492 (directed) ENSDARG00000021120	0.0547801	family
rhbdd1	1	irf1a	directed	ENSDARG00000043492 (directed) ENSDARG00000021046	false	directed	ENSDARG00000043492 (directed) ENSDARG00000021046	0.0172506	family
nfe2	9.5842	irf1a	directed	ENSDARG00000043492 (directed) ENSDARG00000020606	false	directed	ENSDARG00000043492 (directed) ENSDARG00000020606	0.0722189	family
exoc6	1	irf1a	directed	ENSDARG00000043492 (directed) ENSDARG00000020521	false	directed	ENSDARG00000043492 (directed) ENSDARG00000020521	0.0800425	family
nf2a	1	irf1a	directed	ENSDARG00000043492 (directed) ENSDARG00000020204	false	directed	ENSDARG00000043492 (directed) ENSDARG00000020204	0.0175169	family
efnb2a	1	irf1a	directed	ENSDARG00000043492 (directed) ENSDARG00000020164	false	directed	ENSDARG00000043492 (directed) ENSDARG00000020164	0.107206	family
nkd1	1	irf1a	directed	ENSDARG00000043492 (directed) ENSDARG00000020053	false	directed	ENSDARG00000043492 (directed) ENSDARG00000020053	0.0832953	family
tal1	1	irf1a	directed	ENSDARG00000043492 (directed) ENSDARG00000019930	false	directed	ENSDARG00000043492 (directed) ENSDARG00000019930	0.0889443	family
edrf1	1	irf1a	directed	ENSDARG00000043492 (directed) ENSDARG00000019834	false	directed	ENSDARG00000043492 (directed) ENSDARG00000019834	0.0208399	family
prmt3	1	irf1a	directed	ENSDARG00000043492 (directed) ENSDARG00000019791	false	directed	ENSDARG00000043492 (directed) ENSDARG00000019791	0.0260869	family
tlr4ba	1	irf1a	directed	ENSDARG00000043492 (directed) ENSDARG00000019742	false	directed	ENSDARG00000043492 (directed) ENSDARG00000019742	0.0394427	family
jade3	1	irf1a	directed	ENSDARG00000043492 (directed) ENSDARG00000019614	false	directed	ENSDARG00000043492 (directed) ENSDARG00000019614	0.0727266	family
senp8	1	irf1a	directed	ENSDARG00000043492 (directed) ENSDARG00000019595	false	directed	ENSDARG00000043492 (directed) ENSDARG00000019595	0.0178888	family
ldb2a	1	irf1a	directed	ENSDARG00000043492 (directed) ENSDARG00000019579	false	directed	ENSDARG00000043492 (directed) ENSDARG00000019579	0.0932427	family
hdgfrp2	1	irf1a	directed	ENSDARG00000043492 (directed) ENSDARG00000019530	false	directed	ENSDARG00000043492 (directed) ENSDARG00000019530	0.0341125	family
amotl1	1	irf1a	directed	ENSDARG00000043492 (directed) ENSDARG00000019442	false	directed	ENSDARG00000043492 (directed) ENSDARG00000019442	0.0225851	family
fbxo30b	1	irf1a	directed	ENSDARG00000043492 (directed) ENSDARG00000019311	false	directed	ENSDARG00000043492 (directed) ENSDARG00000019311	0.0115745	family
tfdp1a	1	irf1a	directed	ENSDARG00000043492 (directed) ENSDARG00000019293	false	directed	ENSDARG00000043492 (directed) ENSDARG00000019293	0.0335385	family
cul1a	1	irf1a	directed	ENSDARG00000043492 (directed) ENSDARG00000019239	false	directed	ENSDARG00000043492 (directed) ENSDARG00000019239	0.0444906	family
smc3	1	irf1a	directed	ENSDARG00000043492 (directed) ENSDARG00000019000	false	directed	ENSDARG00000043492 (directed) ENSDARG00000019000	0.0849774	family
snrpa	1	irf1a	directed	ENSDARG00000043492 (directed) ENSDARG00000018890	false	directed	ENSDARG00000043492 (directed) ENSDARG00000018890	0.0682877	family
elk3	128.324	irf1a	directed	ENSDARG00000043492 (directed) ENSDARG00000018688	false	directed	ENSDARG00000043492 (directed) ENSDARG00000018688	0.0305668	family
rad54l	1	irf1a	directed	ENSDARG00000043492 (directed) ENSDARG00000018623	false	directed	ENSDARG00000043492 (directed) ENSDARG00000018623	0.0401911	family
cpsf6	1	irf1a	directed	ENSDARG00000043492 (directed) ENSDARG00000018618	false	directed	ENSDARG00000043492 (directed) ENSDARG00000018618	0.0919196	family
ddx61	1	irf1a	directed	ENSDARG00000043492 (directed) ENSDARG00000018425	false	directed	ENSDARG00000043492 (directed) ENSDARG00000018425	0.112677	family
pth1rb	1	irf1a	directed	ENSDARG00000043492 (directed) ENSDARG00000018418	false	directed	ENSDARG00000043492 (directed) ENSDARG00000018418	0.0570206	family
gc2	1	irf1a	directed	ENSDARG00000043492 (directed) ENSDARG00000018329	false	directed	ENSDARG00000043492 (directed) ENSDARG00000018329	0.03423	family
arglu1b	1	irf1a	directed	ENSDARG00000043492 (directed) ENSDARG00000018319	false	directed	ENSDARG00000043492 (directed) ENSDARG00000018319	0.0385292	family
msh2	1	irf1a	directed	ENSDARG00000043492 (directed) ENSDARG00000018022	false	directed	ENSDARG00000043492 (directed) ENSDARG00000018022	0.0234235	family
smc2	1	irf1a	directed	ENSDARG00000043492 (directed) ENSDARG00000017744	false	directed	ENSDARG00000043492 (directed) ENSDARG00000017744	0.0570363	family
ccdc6b	1	irf1a	directed	ENSDARG00000043492 (directed) ENSDARG00000017595	false	directed	ENSDARG00000043492 (directed) ENSDARG00000017595	0.0548824	family
fgf1a	1	irf1a	directed	ENSDARG00000043492 (directed) ENSDARG00000017542	false	directed	ENSDARG00000043492 (directed) ENSDARG00000017542	0.0290839	family
ctdp1	1	irf1a	directed	ENSDARG00000043492 (directed) ENSDARG00000017522	false	directed	ENSDARG00000043492 (directed) ENSDARG00000017522	0.0579334	family
epha2a	1	irf1a	directed	ENSDARG00000043492 (directed) ENSDARG00000017354	false	directed	ENSDARG00000043492 (directed) ENSDARG00000017354	0.0682384	family
kdr	1	irf1a	directed	ENSDARG00000043492 (directed) ENSDARG00000017321	false	directed	ENSDARG00000043492 (directed) ENSDARG00000017321	0.0663088	family
gpsm2	1	irf1a	directed	ENSDARG00000043492 (directed) ENSDARG00000017311	false	directed	ENSDARG00000043492 (directed) ENSDARG00000017311	0.022846	family
elp2	1	irf1a	directed	ENSDARG00000043492 (directed) ENSDARG00000017199	false	directed	ENSDARG00000043492 (directed) ENSDARG00000017199	0.0326662	family
lin28a	1	irf1a	directed	ENSDARG00000043492 (directed) ENSDARG00000016999	false	directed	ENSDARG00000043492 (directed) ENSDARG00000016999	0.0939107	family
srsf6b	1	irf1a	directed	ENSDARG00000043492 (directed) ENSDARG00000016783	false	directed	ENSDARG00000043492 (directed) ENSDARG00000016783	0.0641561	family
huwe1	1	irf1a	directed	ENSDARG00000043492 (directed) ENSDARG00000016782	false	directed	ENSDARG00000043492 (directed) ENSDARG00000016782	0.0725731	family
aqr	1	irf1a	directed	ENSDARG00000043492 (directed) ENSDARG00000016775	false	directed	ENSDARG00000043492 (directed) ENSDARG00000016775	0.0655978	family
znf106a	1	irf1a	directed	ENSDARG00000043492 (directed) ENSDARG00000016651	false	directed	ENSDARG00000043492 (directed) ENSDARG00000016651	0.0245565	family
tprb	1	irf1a	directed	ENSDARG00000043492 (directed) ENSDARG00000016630	false	directed	ENSDARG00000043492 (directed) ENSDARG00000016630	0.106816	family
klhl4	1	irf1a	directed	ENSDARG00000043492 (directed) ENSDARG00000016531	false	directed	ENSDARG00000043492 (directed) ENSDARG00000016531	0.0508258	family
ctdnep1a	1	irf1a	directed	ENSDARG00000043492 (directed) ENSDARG00000016519	false	directed	ENSDARG00000043492 (directed) ENSDARG00000016519	0.0144839	family
gtf2h2	1	irf1a	directed	ENSDARG00000043492 (directed) ENSDARG00000016514	false	directed	ENSDARG00000043492 (directed) ENSDARG00000016514	0.0176319	family
dock9b	1	irf1a	directed	ENSDARG00000043492 (directed) ENSDARG00000016311	false	directed	ENSDARG00000043492 (directed) ENSDARG00000016311	0.0829524	family
trim33	1	irf1a	directed	ENSDARG00000043492 (directed) ENSDARG00000016181	false	directed	ENSDARG00000043492 (directed) ENSDARG00000016181	0.127531	family
eif4enif1	1	irf1a	directed	ENSDARG00000043492 (directed) ENSDARG00000016177	false	directed	ENSDARG00000043492 (directed) ENSDARG00000016177	0.0986057	family
hcfc1a	1	irf1a	directed	ENSDARG00000043492 (directed) ENSDARG00000015990	false	directed	ENSDARG00000043492 (directed) ENSDARG00000015990	0.108762	family
slc44a1a	1	irf1a	directed	ENSDARG00000043492 (directed) ENSDARG00000015946	false	directed	ENSDARG00000043492 (directed) ENSDARG00000015946	0.0306238	family
lemd3	1	irf1a	directed	ENSDARG00000043492 (directed) ENSDARG00000015824	false	directed	ENSDARG00000043492 (directed) ENSDARG00000015824	0.0678244	family
smcr8b	1	irf1a	directed	ENSDARG00000043492 (directed) ENSDARG00000015803	false	directed	ENSDARG00000043492 (directed) ENSDARG00000015803	0.0400843	family
hdac1	1	irf1a	directed	ENSDARG00000043492 (directed) ENSDARG00000015427	false	directed	ENSDARG00000043492 (directed) ENSDARG00000015427	0.0625743	family
st3gal3b	1	irf1a	directed	ENSDARG00000043492 (directed) ENSDARG00000015252	false	directed	ENSDARG00000043492 (directed) ENSDARG00000015252	0.0573499	family
prpf19	1	irf1a	directed	ENSDARG00000043492 (directed) ENSDARG00000015239	false	directed	ENSDARG00000043492 (directed) ENSDARG00000015239	0.0573425	family
hnrnpua	1	irf1a	directed	ENSDARG00000043492 (directed) ENSDARG00000015206	false	directed	ENSDARG00000043492 (directed) ENSDARG00000015206	0.0882627	family
pola2	1	irf1a	directed	ENSDARG00000043492 (directed) ENSDARG00000015070	false	directed	ENSDARG00000043492 (directed) ENSDARG00000015070	0.0366337	family
esco2	1	irf1a	directed	ENSDARG00000043492 (directed) ENSDARG00000014685	false	directed	ENSDARG00000043492 (directed) ENSDARG00000014685	0.0506868	family
znf710a	1	irf1a	directed	ENSDARG00000043492 (directed) ENSDARG00000014680	false	directed	ENSDARG00000043492 (directed) ENSDARG00000014680	0.0263728	family
mbtps1	1	irf1a	directed	ENSDARG00000043492 (directed) ENSDARG00000014634	false	directed	ENSDARG00000043492 (directed) ENSDARG00000014634	0.0497323	family
ilf2	1	irf1a	directed	ENSDARG00000043492 (directed) ENSDARG00000014591	false	directed	ENSDARG00000043492 (directed) ENSDARG00000014591	0.0570037	family
si:dkey-14d8.2	1	irf1a	directed	ENSDARG00000043492 (directed) ENSDARG00000014395	false	directed	ENSDARG00000043492 (directed) ENSDARG00000014395	0.020769	family
rbmx	1	irf1a	directed	ENSDARG00000043492 (directed) ENSDARG00000014244	false	directed	ENSDARG00000043492 (directed) ENSDARG00000014244	0.0690459	family
cldn5b	1	irf1a	directed	ENSDARG00000043492 (directed) ENSDARG00000014059	false	directed	ENSDARG00000043492 (directed) ENSDARG00000014059	0.0467622	family
lmo4a	1	irf1a	directed	ENSDARG00000043492 (directed) ENSDARG00000013853	false	directed	ENSDARG00000043492 (directed) ENSDARG00000013853	0.0678199	family
adgrl4	1	irf1a	directed	ENSDARG00000043492 (directed) ENSDARG00000013653	false	directed	ENSDARG00000043492 (directed) ENSDARG00000013653	0.0438528	family
ppp6r3	1	irf1a	directed	ENSDARG00000043492 (directed) ENSDARG00000013379	false	directed	ENSDARG00000043492 (directed) ENSDARG00000013379	0.0646986	family
znf76	1	irf1a	directed	ENSDARG00000043492 (directed) ENSDARG00000013279	false	directed	ENSDARG00000043492 (directed) ENSDARG00000013279	0.017801	family
tubgcp2	1	irf1a	directed	ENSDARG00000043492 (directed) ENSDARG00000013079	false	directed	ENSDARG00000043492 (directed) ENSDARG00000013079	0.0306482	family
scml2	1	irf1a	directed	ENSDARG00000043492 (directed) ENSDARG00000012949	false	directed	ENSDARG00000043492 (directed) ENSDARG00000012949	0.0903419	family
mat2b	1	irf1a	directed	ENSDARG00000043492 (directed) ENSDARG00000012932	false	directed	ENSDARG00000043492 (directed) ENSDARG00000012932	0.029356	family
ammecr1	1	irf1a	directed	ENSDARG00000043492 (directed) ENSDARG00000012892	false	directed	ENSDARG00000043492 (directed) ENSDARG00000012892	0.0661808	family
mettl3	1	irf1a	directed	ENSDARG00000043492 (directed) ENSDARG00000012827	false	directed	ENSDARG00000043492 (directed) ENSDARG00000012827	0.0621022	family
rbm14a	1	irf1a	directed	ENSDARG00000043492 (directed) ENSDARG00000012723	false	directed	ENSDARG00000043492 (directed) ENSDARG00000012723	0.0603657	family
waca	1	irf1a	directed	ENSDARG00000043492 (directed) ENSDARG00000012577	false	directed	ENSDARG00000043492 (directed) ENSDARG00000012577	0.0902363	family
aurka	1	irf1a	directed	ENSDARG00000043492 (directed) ENSDARG00000012485	false	directed	ENSDARG00000043492 (directed) ENSDARG00000012485	0.0407464	family
adssl	1	irf1a	directed	ENSDARG00000043492 (directed) ENSDARG00000012399	false	directed	ENSDARG00000043492 (directed) ENSDARG00000012399	0.043782	family
adar	1	irf1a	directed	ENSDARG00000043492 (directed) ENSDARG00000012389	false	directed	ENSDARG00000043492 (directed) ENSDARG00000012389	0.051667	family
def6a	1	irf1a	directed	ENSDARG00000043492 (directed) ENSDARG00000012247	false	directed	ENSDARG00000043492 (directed) ENSDARG00000012247	0.0266145	family
kif15	1	irf1a	directed	ENSDARG00000043492 (directed) ENSDARG00000012073	false	directed	ENSDARG00000043492 (directed) ENSDARG00000012073	0.0661837	family
pigo	1	irf1a	directed	ENSDARG00000043492 (directed) ENSDARG00000011743	false	directed	ENSDARG00000043492 (directed) ENSDARG00000011743	0.0307292	family
dnase1l4.2	1	irf1a	directed	ENSDARG00000043492 (directed) ENSDARG00000011376	false	directed	ENSDARG00000043492 (directed) ENSDARG00000011376	0.0370429	family
ddx11	1	irf1a	directed	ENSDARG00000043492 (directed) ENSDARG00000011072	false	directed	ENSDARG00000043492 (directed) ENSDARG00000011072	0.0297502	family
kif11	1	irf1a	directed	ENSDARG00000043492 (directed) ENSDARG00000010948	false	directed	ENSDARG00000043492 (directed) ENSDARG00000010948	0.0770838	family
nprl3	1	irf1a	directed	ENSDARG00000043492 (directed) ENSDARG00000010918	false	directed	ENSDARG00000043492 (directed) ENSDARG00000010918	0.0147715	family
cdc25b	1	irf1a	directed	ENSDARG00000043492 (directed) ENSDARG00000010792	false	directed	ENSDARG00000043492 (directed) ENSDARG00000010792	0.0207685	family
epha4l	1	irf1a	directed	ENSDARG00000043492 (directed) ENSDARG00000010767	false	directed	ENSDARG00000043492 (directed) ENSDARG00000010767	0.107586	family
fam46c	1	irf1a	directed	ENSDARG00000043492 (directed) ENSDARG00000010437	false	directed	ENSDARG00000043492 (directed) ENSDARG00000010437	0.0506112	family
si:ch211-26b3.2	1	irf1a	directed	ENSDARG00000043492 (directed) ENSDARG00000010331	false	directed	ENSDARG00000043492 (directed) ENSDARG00000010331	0.0364837	family
med14	1	irf1a	directed	ENSDARG00000043492 (directed) ENSDARG00000009953	false	directed	ENSDARG00000043492 (directed) ENSDARG00000009953	0.0812047	family
agk	1	irf1a	directed	ENSDARG00000043492 (directed) ENSDARG00000009837	false	directed	ENSDARG00000043492 (directed) ENSDARG00000009837	0.0154069	family
rpn2	1	irf1a	directed	ENSDARG00000043492 (directed) ENSDARG00000009724	false	directed	ENSDARG00000043492 (directed) ENSDARG00000009724	0.0571131	family
ubxn7	1	irf1a	directed	ENSDARG00000043492 (directed) ENSDARG00000009436	false	directed	ENSDARG00000043492 (directed) ENSDARG00000009436	0.095986	family
prkcda	1	irf1a	directed	ENSDARG00000043492 (directed) ENSDARG00000009208	false	directed	ENSDARG00000043492 (directed) ENSDARG00000009208	0.0201294	family
ENSDARG00000009131	1	irf1a	directed	ENSDARG00000043492 (directed) ENSDARG00000009131	false	directed	ENSDARG00000043492 (directed) ENSDARG00000009131	0.0684642	family
chrm1b	1	irf1a	directed	ENSDARG00000043492 (directed) ENSDARG00000009121	false	directed	ENSDARG00000043492 (directed) ENSDARG00000009121	0.0332286	family
pdia6	1	irf1a	directed	ENSDARG00000043492 (directed) ENSDARG00000009001	false	directed	ENSDARG00000043492 (directed) ENSDARG00000009001	0.04108	family
pofut1	1	irf1a	directed	ENSDARG00000043492 (directed) ENSDARG00000008953	false	directed	ENSDARG00000043492 (directed) ENSDARG00000008953	0.00614062	family
rtf1	1	irf1a	directed	ENSDARG00000043492 (directed) ENSDARG00000008947	false	directed	ENSDARG00000043492 (directed) ENSDARG00000008947	0.0718825	family
elp4	1	irf1a	directed	ENSDARG00000043492 (directed) ENSDARG00000008852	false	directed	ENSDARG00000043492 (directed) ENSDARG00000008852	0.0236667	family
hsf1	1	irf1a	directed	ENSDARG00000043492 (directed) ENSDARG00000008818	false	directed	ENSDARG00000043492 (directed) ENSDARG00000008818	0.033971	family
ranbp3a	1	irf1a	directed	ENSDARG00000043492 (directed) ENSDARG00000008727	false	directed	ENSDARG00000043492 (directed) ENSDARG00000008727	0.027853	family
glcci1	1	irf1a	directed	ENSDARG00000043492 (directed) ENSDARG00000008503	false	directed	ENSDARG00000043492 (directed) ENSDARG00000008503	0.0563123	family
snupn	1	irf1a	directed	ENSDARG00000043492 (directed) ENSDARG00000008395	false	directed	ENSDARG00000043492 (directed) ENSDARG00000008395	0.0519077	family
epn2	1	irf1a	directed	ENSDARG00000043492 (directed) ENSDARG00000008377	false	directed	ENSDARG00000043492 (directed) ENSDARG00000008377	0.0787873	family
mia3	1	irf1a	directed	ENSDARG00000043492 (directed) ENSDARG00000008184	false	directed	ENSDARG00000043492 (directed) ENSDARG00000008184	0.0903487	family
serinc5	1	irf1a	directed	ENSDARG00000043492 (directed) ENSDARG00000008153	false	directed	ENSDARG00000043492 (directed) ENSDARG00000008153	0.0647628	family
kif18a	1	irf1a	directed	ENSDARG00000043492 (directed) ENSDARG00000008022	false	directed	ENSDARG00000043492 (directed) ENSDARG00000008022	0.0721383	family
slc35b2	1	irf1a	directed	ENSDARG00000043492 (directed) ENSDARG00000007886	false	directed	ENSDARG00000043492 (directed) ENSDARG00000007886	0.0536001	family
sp3b	1	irf1a	directed	ENSDARG00000043492 (directed) ENSDARG00000007812	false	directed	ENSDARG00000043492 (directed) ENSDARG00000007812	0.0510039	family
cnot4b	1	irf1a	directed	ENSDARG00000043492 (directed) ENSDARG00000007639	false	directed	ENSDARG00000043492 (directed) ENSDARG00000007639	0.0248997	family
irf2a	1	irf1a	directed	ENSDARG00000043492 (directed) ENSDARG00000007387	false	directed	ENSDARG00000043492 (directed) ENSDARG00000007387	0.0264019	family
dysf	1	irf1a	directed	ENSDARG00000043492 (directed) ENSDARG00000007370	false	directed	ENSDARG00000043492 (directed) ENSDARG00000007370	0.029941	family
tmpoa	1	irf1a	directed	ENSDARG00000043492 (directed) ENSDARG00000007315	false	directed	ENSDARG00000043492 (directed) ENSDARG00000007315	0.0693211	family
si:dkey-27j5.3	1	irf1a	directed	ENSDARG00000043492 (directed) ENSDARG00000007289	false	directed	ENSDARG00000043492 (directed) ENSDARG00000007289	0.0595252	family
slc6a16a	1	irf1a	directed	ENSDARG00000043492 (directed) ENSDARG00000007129	false	directed	ENSDARG00000043492 (directed) ENSDARG00000007129	0.0343334	family
asb6	1	irf1a	directed	ENSDARG00000043492 (directed) ENSDARG00000007125	false	directed	ENSDARG00000043492 (directed) ENSDARG00000007125	0.07873	family
tbx6l	162.311	irf1a	directed	ENSDARG00000043492 (directed) ENSDARG00000006939	false	directed	ENSDARG00000043492 (directed) ENSDARG00000006939	0.0887881	family
impdh2	1	irf1a	directed	ENSDARG00000043492 (directed) ENSDARG00000006900	false	directed	ENSDARG00000043492 (directed) ENSDARG00000006900	0.0324271	family
urod	1	irf1a	directed	ENSDARG00000043492 (directed) ENSDARG00000006818	false	directed	ENSDARG00000043492 (directed) ENSDARG00000006818	0.0249499	family
anp32a	1	irf1a	directed	ENSDARG00000043492 (directed) ENSDARG00000006487	false	directed	ENSDARG00000043492 (directed) ENSDARG00000006487	0.0165136	family
crlf1b	1	irf1a	directed	ENSDARG00000043492 (directed) ENSDARG00000006368	false	directed	ENSDARG00000043492 (directed) ENSDARG00000006368	0.063853	family
itga5	1	irf1a	directed	ENSDARG00000043492 (directed) ENSDARG00000006353	false	directed	ENSDARG00000043492 (directed) ENSDARG00000006353	0.0370392	family
akap1b	1	irf1a	directed	ENSDARG00000043492 (directed) ENSDARG00000006062	false	directed	ENSDARG00000043492 (directed) ENSDARG00000006062	0.0448027	family
mycla	1	irf1a	directed	ENSDARG00000043492 (directed) ENSDARG00000006003	false	directed	ENSDARG00000043492 (directed) ENSDARG00000006003	0.0323995	family
gon4l	1	irf1a	directed	ENSDARG00000043492 (directed) ENSDARG00000005867	false	directed	ENSDARG00000043492 (directed) ENSDARG00000005867	0.0381033	family
ddx3b	1	irf1a	directed	ENSDARG00000043492 (directed) ENSDARG00000005774	false	directed	ENSDARG00000043492 (directed) ENSDARG00000005774	0.0775869	family
tsr2	1	irf1a	directed	ENSDARG00000043492 (directed) ENSDARG00000005772	false	directed	ENSDARG00000043492 (directed) ENSDARG00000005772	0.0346786	family
psmd11b	1	irf1a	directed	ENSDARG00000043492 (directed) ENSDARG00000005134	false	directed	ENSDARG00000043492 (directed) ENSDARG00000005134	0.0259374	family
zgc:86764	1	irf1a	directed	ENSDARG00000043492 (directed) ENSDARG00000005098	false	directed	ENSDARG00000043492 (directed) ENSDARG00000005098	0.032715	family
brf1b	1	irf1a	directed	ENSDARG00000043492 (directed) ENSDARG00000005002	false	directed	ENSDARG00000043492 (directed) ENSDARG00000005002	0.0818578	family
foxp1a	1	irf1a	directed	ENSDARG00000043492 (directed) ENSDARG00000004843	false	directed	ENSDARG00000043492 (directed) ENSDARG00000004843	0.056159	family
ccdc9	1	irf1a	directed	ENSDARG00000043492 (directed) ENSDARG00000004636	false	directed	ENSDARG00000043492 (directed) ENSDARG00000004636	0.00845819	family
hdr	1	irf1a	directed	ENSDARG00000043492 (directed) ENSDARG00000004392	false	directed	ENSDARG00000043492 (directed) ENSDARG00000004392	0.0846202	family
fmnl3	1	irf1a	directed	ENSDARG00000043492 (directed) ENSDARG00000004372	false	directed	ENSDARG00000043492 (directed) ENSDARG00000004372	0.0965246	family
cnot1	1	irf1a	directed	ENSDARG00000043492 (directed) ENSDARG00000004174	false	directed	ENSDARG00000043492 (directed) ENSDARG00000004174	0.0975186	family
acsbg2	1	irf1a	directed	ENSDARG00000043492 (directed) ENSDARG00000004094	false	directed	ENSDARG00000043492 (directed) ENSDARG00000004094	0.0309186	family
rrs1	1	irf1a	directed	ENSDARG00000043492 (directed) ENSDARG00000003941	false	directed	ENSDARG00000043492 (directed) ENSDARG00000003941	0.0214339	family
pard6b	1	irf1a	directed	ENSDARG00000043492 (directed) ENSDARG00000003865	false	directed	ENSDARG00000043492 (directed) ENSDARG00000003865	0.0181319	family
ppp1caa	1	irf1a	directed	ENSDARG00000043492 (directed) ENSDARG00000003486	false	directed	ENSDARG00000043492 (directed) ENSDARG00000003486	0.0505104	family
nfkbil1	1	irf1a	directed	ENSDARG00000043492 (directed) ENSDARG00000003157	false	directed	ENSDARG00000043492 (directed) ENSDARG00000003157	0.0159429	family
cep135	1	irf1a	directed	ENSDARG00000043492 (directed) ENSDARG00000002991	false	directed	ENSDARG00000043492 (directed) ENSDARG00000002991	0.0166248	family
gbx2	1	irf1a	directed	ENSDARG00000043492 (directed) ENSDARG00000002933	false	directed	ENSDARG00000043492 (directed) ENSDARG00000002933	0.0434125	family
cep57l1	1	irf1a	directed	ENSDARG00000043492 (directed) ENSDARG00000002826	false	directed	ENSDARG00000043492 (directed) ENSDARG00000002826	0.0641066	family
rnf145a	1	irf1a	directed	ENSDARG00000043492 (directed) ENSDARG00000002609	false	directed	ENSDARG00000043492 (directed) ENSDARG00000002609	0.0996849	family
arhgef37	1	irf1a	directed	ENSDARG00000043492 (directed) ENSDARG00000002463	false	directed	ENSDARG00000043492 (directed) ENSDARG00000002463	0.029535	family
prdm1a	65.7206	irf1a	directed	ENSDARG00000043492 (directed) ENSDARG00000002445	false	directed	ENSDARG00000043492 (directed) ENSDARG00000002445	0.0374414	family
mief2	1	irf1a	directed	ENSDARG00000043492 (directed) ENSDARG00000002377	false	directed	ENSDARG00000043492 (directed) ENSDARG00000002377	0.0100611	family
rhd	1	irf1a	directed	ENSDARG00000043492 (directed) ENSDARG00000002194	false	directed	ENSDARG00000043492 (directed) ENSDARG00000002194	0.0831053	family
txlng	1	irf1a	directed	ENSDARG00000043492 (directed) ENSDARG00000001969	false	directed	ENSDARG00000043492 (directed) ENSDARG00000001969	0.00960359	family
slc29a2	1	irf1a	directed	ENSDARG00000043492 (directed) ENSDARG00000001767	false	directed	ENSDARG00000043492 (directed) ENSDARG00000001767	0.0606445	family
tomm34	1	irf1a	directed	ENSDARG00000043492 (directed) ENSDARG00000001557	false	directed	ENSDARG00000043492 (directed) ENSDARG00000001557	0.0341823	family
sp3a	1	irf1a	directed	ENSDARG00000043492 (directed) ENSDARG00000001549	false	directed	ENSDARG00000043492 (directed) ENSDARG00000001549	0.0925485	family
g2e3	1	irf1a	directed	ENSDARG00000043492 (directed) ENSDARG00000001313	false	directed	ENSDARG00000043492 (directed) ENSDARG00000001313	0.0476598	family
puf60b	1	irf1a	directed	ENSDARG00000043492 (directed) ENSDARG00000001241	false	directed	ENSDARG00000043492 (directed) ENSDARG00000001241	0.0667732	family
map4k2	1	irf1a	directed	ENSDARG00000043492 (directed) ENSDARG00000001234	false	directed	ENSDARG00000043492 (directed) ENSDARG00000001234	0.0321592	family
dicer1	1	irf1a	directed	ENSDARG00000043492 (directed) ENSDARG00000001129	false	directed	ENSDARG00000043492 (directed) ENSDARG00000001129	0.037095	family
ENSDARG00000105513	1.48377	irf2a	directed	ENSDARG00000007387 (directed) ENSDARG00000105513	false	directed	ENSDARG00000007387 (directed) ENSDARG00000105513	0.0278251	family
ENSDARG00000105374	1.65952	irf2a	directed	ENSDARG00000007387 (directed) ENSDARG00000105374	false	directed	ENSDARG00000007387 (directed) ENSDARG00000105374	0.070288	family
zgc:173552	1.11111	irf2a	directed	ENSDARG00000007387 (directed) ENSDARG00000105345	false	directed	ENSDARG00000007387 (directed) ENSDARG00000105345	0.0656509	family
ENSDARG00000105294	1.17143	irf2a	directed	ENSDARG00000007387 (directed) ENSDARG00000105294	false	directed	ENSDARG00000007387 (directed) ENSDARG00000105294	0.0203309	family
shkbp1	1	irf2a	directed	ENSDARG00000007387 (directed) ENSDARG00000105050	false	directed	ENSDARG00000007387 (directed) ENSDARG00000105050	0.0304523	family
ENSDARG00000104940	1.35758	irf2a	directed	ENSDARG00000007387 (directed) ENSDARG00000104940	false	directed	ENSDARG00000007387 (directed) ENSDARG00000104940	0.0194661	family
ENSDARG00000104861	1.35	irf2a	directed	ENSDARG00000007387 (directed) ENSDARG00000104861	false	directed	ENSDARG00000007387 (directed) ENSDARG00000104861	0.0174363	family
trim35-7	1.25694	irf2a	directed	ENSDARG00000007387 (directed) ENSDARG00000104825	false	directed	ENSDARG00000007387 (directed) ENSDARG00000104825	0.0695361	family
zgc:171422	5.64881	irf2a	directed	ENSDARG00000007387 (directed) ENSDARG00000104715	false	directed	ENSDARG00000007387 (directed) ENSDARG00000104715	0.0244496	family
ENSDARG00000104492	3.08089	irf2a	directed	ENSDARG00000007387 (directed) ENSDARG00000104492	false	directed	ENSDARG00000007387 (directed) ENSDARG00000104492	0.0465549	family
esm1	1	irf2a	directed	ENSDARG00000007387 (directed) ENSDARG00000104370	false	directed	ENSDARG00000007387 (directed) ENSDARG00000104370	0.0317382	family
zgc:154064	1.09091	irf2a	directed	ENSDARG00000007387 (directed) ENSDARG00000104316	false	directed	ENSDARG00000007387 (directed) ENSDARG00000104316	0.0281792	family
si:ch211-212k18.4	1.20833	irf2a	directed	ENSDARG00000007387 (directed) ENSDARG00000104169	false	directed	ENSDARG00000007387 (directed) ENSDARG00000104169	0.0422807	family
hoxa11a	1	irf2a	directed	ENSDARG00000007387 (directed) ENSDARG00000104162	false	directed	ENSDARG00000007387 (directed) ENSDARG00000104162	0.013941	family
ttf2	1.325	irf2a	directed	ENSDARG00000007387 (directed) ENSDARG00000104105	false	directed	ENSDARG00000007387 (directed) ENSDARG00000104105	0.0555402	family
arid3b	1.07143	irf2a	directed	ENSDARG00000007387 (directed) ENSDARG00000104034	false	directed	ENSDARG00000007387 (directed) ENSDARG00000104034	0.0335304	family
calr3a	1.5846	irf2a	directed	ENSDARG00000007387 (directed) ENSDARG00000103979	false	directed	ENSDARG00000007387 (directed) ENSDARG00000103979	0.0150102	family
terf2ip	1.74167	irf2a	directed	ENSDARG00000007387 (directed) ENSDARG00000103977	false	directed	ENSDARG00000007387 (directed) ENSDARG00000103977	0.0181052	family
zgc:154055	1.40192	irf2a	directed	ENSDARG00000007387 (directed) ENSDARG00000103924	false	directed	ENSDARG00000007387 (directed) ENSDARG00000103924	0.0203235	family
sgol1	1.1	irf2a	directed	ENSDARG00000007387 (directed) ENSDARG00000103907	false	directed	ENSDARG00000007387 (directed) ENSDARG00000103907	0.091436	family
cyyr1	1.5	irf2a	directed	ENSDARG00000007387 (directed) ENSDARG00000103783	false	directed	ENSDARG00000007387 (directed) ENSDARG00000103783	0.0330046	family
LOC100535210	1.30556	irf2a	directed	ENSDARG00000007387 (directed) ENSDARG00000103711	false	directed	ENSDARG00000007387 (directed) ENSDARG00000103711	0.0547497	family
wtip	1.11111	irf2a	directed	ENSDARG00000007387 (directed) ENSDARG00000103607	false	directed	ENSDARG00000007387 (directed) ENSDARG00000103607	0.0553488	family
gtf2b	1.25397	irf2a	directed	ENSDARG00000007387 (directed) ENSDARG00000103578	false	directed	ENSDARG00000007387 (directed) ENSDARG00000103578	0.0283284	family
ephb3b	1.0625	irf2a	directed	ENSDARG00000007387 (directed) ENSDARG00000103576	false	directed	ENSDARG00000007387 (directed) ENSDARG00000103576	0.058578	family
ENSDARG00000103525	1.24835	irf2a	directed	ENSDARG00000007387 (directed) ENSDARG00000103525	false	directed	ENSDARG00000007387 (directed) ENSDARG00000103525	0.0391693	family
sec24c	1.17424	irf2a	directed	ENSDARG00000007387 (directed) ENSDARG00000103516	false	directed	ENSDARG00000007387 (directed) ENSDARG00000103516	0.0142881	family
ENSDARG00000103415	1.11111	irf2a	directed	ENSDARG00000007387 (directed) ENSDARG00000103415	false	directed	ENSDARG00000007387 (directed) ENSDARG00000103415	0.0728733	family
si:ch211-212k18.5	1	irf2a	directed	ENSDARG00000007387 (directed) ENSDARG00000103316	false	directed	ENSDARG00000007387 (directed) ENSDARG00000103316	0.0800978	family
ENSDARG00000103284	1.08333	irf2a	directed	ENSDARG00000007387 (directed) ENSDARG00000103284	false	directed	ENSDARG00000007387 (directed) ENSDARG00000103284	0.0104938	family
gpr107	1	irf2a	directed	ENSDARG00000007387 (directed) ENSDARG00000103200	false	directed	ENSDARG00000007387 (directed) ENSDARG00000103200	0.0103505	family
LOC101882667	1.59286	irf2a	directed	ENSDARG00000007387 (directed) ENSDARG00000103157	false	directed	ENSDARG00000007387 (directed) ENSDARG00000103157	0.0158306	family
zgc:110434	1.15882	irf2a	directed	ENSDARG00000007387 (directed) ENSDARG00000103015	false	directed	ENSDARG00000007387 (directed) ENSDARG00000103015	0.0469694	family
vps54	1.18803	irf2a	directed	ENSDARG00000007387 (directed) ENSDARG00000102960	false	directed	ENSDARG00000007387 (directed) ENSDARG00000102960	0.0145237	family
fam193b	1.31944	irf2a	directed	ENSDARG00000007387 (directed) ENSDARG00000102831	false	directed	ENSDARG00000007387 (directed) ENSDARG00000102831	0.0809467	family
tmem39a	1.36587	irf2a	directed	ENSDARG00000007387 (directed) ENSDARG00000102746	false	directed	ENSDARG00000007387 (directed) ENSDARG00000102746	0.0598733	family
ENSDARG00000102651	1.47778	irf2a	directed	ENSDARG00000007387 (directed) ENSDARG00000102651	false	directed	ENSDARG00000007387 (directed) ENSDARG00000102651	0.0208149	family
kdm8	1.14286	irf2a	directed	ENSDARG00000007387 (directed) ENSDARG00000102512	false	directed	ENSDARG00000007387 (directed) ENSDARG00000102512	0.0214808	family
smarcal1	1.36869	irf2a	directed	ENSDARG00000007387 (directed) ENSDARG00000102265	false	directed	ENSDARG00000007387 (directed) ENSDARG00000102265	0.0537366	family
si:ch211-71n6.4	1	irf2a	directed	ENSDARG00000007387 (directed) ENSDARG00000102234	false	directed	ENSDARG00000007387 (directed) ENSDARG00000102234	0.0256215	family
phospho2	1.22222	irf2a	directed	ENSDARG00000007387 (directed) ENSDARG00000102202	false	directed	ENSDARG00000007387 (directed) ENSDARG00000102202	0.0129648	family
ppox	1.16234	irf2a	directed	ENSDARG00000007387 (directed) ENSDARG00000102167	false	directed	ENSDARG00000007387 (directed) ENSDARG00000102167	0.0315194	family
ENSDARG00000102117	1	irf2a	directed	ENSDARG00000007387 (directed) ENSDARG00000102117	false	directed	ENSDARG00000007387 (directed) ENSDARG00000102117	0.0149922	family
ENSDARG00000102053	2.45	irf2a	directed	ENSDARG00000007387 (directed) ENSDARG00000102053	false	directed	ENSDARG00000007387 (directed) ENSDARG00000102053	0.0190485	family
pkn2	1	irf2a	directed	ENSDARG00000007387 (directed) ENSDARG00000101983	false	directed	ENSDARG00000007387 (directed) ENSDARG00000101983	0.0443824	family
ptbp2a	1.46978	irf2a	directed	ENSDARG00000007387 (directed) ENSDARG00000101947	false	directed	ENSDARG00000007387 (directed) ENSDARG00000101947	0.0549269	family
zgc:152816	1.28803	irf2a	directed	ENSDARG00000007387 (directed) ENSDARG00000101808	false	directed	ENSDARG00000007387 (directed) ENSDARG00000101808	0.0302611	family
plekhg5b	1.31978	irf2a	directed	ENSDARG00000007387 (directed) ENSDARG00000101752	false	directed	ENSDARG00000007387 (directed) ENSDARG00000101752	0.0241525	family
si:dkey-30e9.7	1.16783	irf2a	directed	ENSDARG00000007387 (directed) ENSDARG00000101697	false	directed	ENSDARG00000007387 (directed) ENSDARG00000101697	0.0490924	family
kntc1	1.46111	irf2a	directed	ENSDARG00000007387 (directed) ENSDARG00000101670	false	directed	ENSDARG00000007387 (directed) ENSDARG00000101670	0.100954	family
ccnd1	1.50162	irf2a	directed	ENSDARG00000007387 (directed) ENSDARG00000101637	false	directed	ENSDARG00000007387 (directed) ENSDARG00000101637	0.0692672	family
e2f4	184.98	irf2a	directed	ENSDARG00000007387 (directed) ENSDARG00000101578	false	directed	ENSDARG00000007387 (directed) ENSDARG00000101578	0.0740578	family
ENSDARG00000101572	1.08333	irf2a	directed	ENSDARG00000007387 (directed) ENSDARG00000101572	false	directed	ENSDARG00000007387 (directed) ENSDARG00000101572	0.0519331	family
psma1	1.15385	irf2a	directed	ENSDARG00000007387 (directed) ENSDARG00000101560	false	directed	ENSDARG00000007387 (directed) ENSDARG00000101560	0.0226666	family
LOC103911715	1.18254	irf2a	directed	ENSDARG00000007387 (directed) ENSDARG00000101208	false	directed	ENSDARG00000007387 (directed) ENSDARG00000101208	0.0192316	family
LOC568955	1.36111	irf2a	directed	ENSDARG00000007387 (directed) ENSDARG00000101203	false	directed	ENSDARG00000007387 (directed) ENSDARG00000101203	0.0406187	family
nufip1	1.79286	irf2a	directed	ENSDARG00000007387 (directed) ENSDARG00000101024	false	directed	ENSDARG00000007387 (directed) ENSDARG00000101024	0.0300482	family
LOC100333697	1.17692	irf2a	directed	ENSDARG00000007387 (directed) ENSDARG00000100999	false	directed	ENSDARG00000007387 (directed) ENSDARG00000100999	0.038271	family
prc1a	1.19444	irf2a	directed	ENSDARG00000007387 (directed) ENSDARG00000100918	false	directed	ENSDARG00000007387 (directed) ENSDARG00000100918	0.106973	family
arhgef12b	1.22222	irf2a	directed	ENSDARG00000007387 (directed) ENSDARG00000100913	false	directed	ENSDARG00000007387 (directed) ENSDARG00000100913	0.0400512	family
zmynd19	1.17692	irf2a	directed	ENSDARG00000007387 (directed) ENSDARG00000100773	false	directed	ENSDARG00000007387 (directed) ENSDARG00000100773	0.0241806	family
egfl7	1.14835	irf2a	directed	ENSDARG00000007387 (directed) ENSDARG00000100657	false	directed	ENSDARG00000007387 (directed) ENSDARG00000100657	0.0488486	family
slbp	1.07692	irf2a	directed	ENSDARG00000007387 (directed) ENSDARG00000100558	false	directed	ENSDARG00000007387 (directed) ENSDARG00000100558	0.0580634	family
alad	1.375	irf2a	directed	ENSDARG00000007387 (directed) ENSDARG00000100372	false	directed	ENSDARG00000007387 (directed) ENSDARG00000100372	0.0393985	family
ahsa1b	1.16667	irf2a	directed	ENSDARG00000007387 (directed) ENSDARG00000100317	false	directed	ENSDARG00000007387 (directed) ENSDARG00000100317	0.0114688	family
thumpd1	1.26667	irf2a	directed	ENSDARG00000007387 (directed) ENSDARG00000100264	false	directed	ENSDARG00000007387 (directed) ENSDARG00000100264	0.0223166	family
zgc:63694	1.17692	irf2a	directed	ENSDARG00000007387 (directed) ENSDARG00000100227	false	directed	ENSDARG00000007387 (directed) ENSDARG00000100227	0.0483419	family
tcf3b	1	irf2a	directed	ENSDARG00000007387 (directed) ENSDARG00000099999	false	directed	ENSDARG00000007387 (directed) ENSDARG00000099999	0.0891804	family
si:ch211-207i20.2	1.90931	irf2a	directed	ENSDARG00000007387 (directed) ENSDARG00000099986	false	directed	ENSDARG00000007387 (directed) ENSDARG00000099986	0.0200862	family
ENSDARG00000099981	6.6936	irf2a	directed	ENSDARG00000007387 (directed) ENSDARG00000099981	false	directed	ENSDARG00000007387 (directed) ENSDARG00000099981	0.0617577	family
tbce	1.24432	irf2a	directed	ENSDARG00000007387 (directed) ENSDARG00000099921	false	directed	ENSDARG00000007387 (directed) ENSDARG00000099921	0.024168	family
arl4aa	1.20192	irf2a	directed	ENSDARG00000007387 (directed) ENSDARG00000099918	false	directed	ENSDARG00000007387 (directed) ENSDARG00000099918	0.0473097	family
si:dkey-114g7.4	1.41111	irf2a	directed	ENSDARG00000007387 (directed) ENSDARG00000099814	false	directed	ENSDARG00000007387 (directed) ENSDARG00000099814	0.017677	family
baz1a	1.24359	irf2a	directed	ENSDARG00000007387 (directed) ENSDARG00000099745	false	directed	ENSDARG00000007387 (directed) ENSDARG00000099745	0.0116313	family
eed	1.35397	irf2a	directed	ENSDARG00000007387 (directed) ENSDARG00000099640	false	directed	ENSDARG00000007387 (directed) ENSDARG00000099640	0.0589156	family
ENSDARG00000099569	1.35	irf2a	directed	ENSDARG00000007387 (directed) ENSDARG00000099569	false	directed	ENSDARG00000007387 (directed) ENSDARG00000099569	0.0476806	family
cnnm3	1.125	irf2a	directed	ENSDARG00000007387 (directed) ENSDARG00000099568	false	directed	ENSDARG00000007387 (directed) ENSDARG00000099568	0.0165215	family
cnn3a	1	irf2a	directed	ENSDARG00000007387 (directed) ENSDARG00000099510	false	directed	ENSDARG00000007387 (directed) ENSDARG00000099510	0.0428852	family
fbxw5	1.17424	irf2a	directed	ENSDARG00000007387 (directed) ENSDARG00000099139	false	directed	ENSDARG00000007387 (directed) ENSDARG00000099139	0.0312826	family
ENSDARG00000099091	1.18333	irf2a	directed	ENSDARG00000007387 (directed) ENSDARG00000099091	false	directed	ENSDARG00000007387 (directed) ENSDARG00000099091	0.0315673	family
pex1	1.26786	irf2a	directed	ENSDARG00000007387 (directed) ENSDARG00000098904	false	directed	ENSDARG00000007387 (directed) ENSDARG00000098904	0.013503	family
pds5b	1.41303	irf2a	directed	ENSDARG00000007387 (directed) ENSDARG00000098897	false	directed	ENSDARG00000007387 (directed) ENSDARG00000098897	0.070085	family
tubb2b	1	irf2a	directed	ENSDARG00000007387 (directed) ENSDARG00000098591	false	directed	ENSDARG00000007387 (directed) ENSDARG00000098591	0.0666291	family
pdgfab	1.09091	irf2a	directed	ENSDARG00000007387 (directed) ENSDARG00000098578	false	directed	ENSDARG00000007387 (directed) ENSDARG00000098578	0.0572227	family
srsf11	1.3373	irf2a	directed	ENSDARG00000007387 (directed) ENSDARG00000098574	false	directed	ENSDARG00000007387 (directed) ENSDARG00000098574	0.0510741	family
ENSDARG00000098543	1.62063	irf2a	directed	ENSDARG00000007387 (directed) ENSDARG00000098543	false	directed	ENSDARG00000007387 (directed) ENSDARG00000098543	0.0240135	family
ENSDARG00000098503	1.0625	irf2a	directed	ENSDARG00000007387 (directed) ENSDARG00000098503	false	directed	ENSDARG00000007387 (directed) ENSDARG00000098503	0.0284709	family
LOC563292	1.15	irf2a	directed	ENSDARG00000007387 (directed) ENSDARG00000098424	false	directed	ENSDARG00000007387 (directed) ENSDARG00000098424	0.0513085	family
actr5	1.28254	irf2a	directed	ENSDARG00000007387 (directed) ENSDARG00000098235	false	directed	ENSDARG00000007387 (directed) ENSDARG00000098235	0.0130983	family
wrn	1.525	irf2a	directed	ENSDARG00000007387 (directed) ENSDARG00000098211	false	directed	ENSDARG00000007387 (directed) ENSDARG00000098211	0.0657057	family
si:dkeyp-97a10.2	1.54167	irf2a	directed	ENSDARG00000007387 (directed) ENSDARG00000098129	false	directed	ENSDARG00000007387 (directed) ENSDARG00000098129	0.0264054	family
ENSDARG00000097600	1.16783	irf2a	directed	ENSDARG00000007387 (directed) ENSDARG00000097600	false	directed	ENSDARG00000007387 (directed) ENSDARG00000097600	0.0122746	family
ugt1b1	1.09091	irf2a	directed	ENSDARG00000007387 (directed) ENSDARG00000097491	false	directed	ENSDARG00000007387 (directed) ENSDARG00000097491	0.026611	family
si:dkey-108k21.25	1.18803	irf2a	directed	ENSDARG00000007387 (directed) ENSDARG00000097258	false	directed	ENSDARG00000007387 (directed) ENSDARG00000097258	0.0613662	family
ENSDARG00000096978	1.29924	irf2a	directed	ENSDARG00000007387 (directed) ENSDARG00000096978	false	directed	ENSDARG00000007387 (directed) ENSDARG00000096978	0.0750042	family
LOC108179323	1.20202	irf2a	directed	ENSDARG00000007387 (directed) ENSDARG00000096951	false	directed	ENSDARG00000007387 (directed) ENSDARG00000096951	0.0464899	family
ENSDARG00000096894	1.41303	irf2a	directed	ENSDARG00000007387 (directed) ENSDARG00000096894	false	directed	ENSDARG00000007387 (directed) ENSDARG00000096894	0.0161167	family
si:dkey-66i24.9	1.56667	irf2a	directed	ENSDARG00000007387 (directed) ENSDARG00000096689	false	directed	ENSDARG00000007387 (directed) ENSDARG00000096689	0.0547777	family
si:dkey-25o16.2	1.11111	irf2a	directed	ENSDARG00000007387 (directed) ENSDARG00000096667	false	directed	ENSDARG00000007387 (directed) ENSDARG00000096667	0.0567803	family
si:dkey-45d16.4	1.18803	irf2a	directed	ENSDARG00000007387 (directed) ENSDARG00000096421	false	directed	ENSDARG00000007387 (directed) ENSDARG00000096421	0.018506	family
si:dkey-260c8.8	1.50278	irf2a	directed	ENSDARG00000007387 (directed) ENSDARG00000096229	false	directed	ENSDARG00000007387 (directed) ENSDARG00000096229	0.0305138	family
ENSDARG00000095340	1.4171	irf2a	directed	ENSDARG00000007387 (directed) ENSDARG00000095340	false	directed	ENSDARG00000007387 (directed) ENSDARG00000095340	0.066862	family
si:dkey-14d8.1	1.47778	irf2a	directed	ENSDARG00000007387 (directed) ENSDARG00000095332	false	directed	ENSDARG00000007387 (directed) ENSDARG00000095332	0.0418404	family
ENSDARG00000095304	1.07692	irf2a	directed	ENSDARG00000007387 (directed) ENSDARG00000095304	false	directed	ENSDARG00000007387 (directed) ENSDARG00000095304	0.0285267	family
si:ch211-113a14.15	1.25	irf2a	directed	ENSDARG00000007387 (directed) ENSDARG00000094744	false	directed	ENSDARG00000007387 (directed) ENSDARG00000094744	0.0683327	family
dyrk2	1.13596	irf2a	directed	ENSDARG00000007387 (directed) ENSDARG00000094646	false	directed	ENSDARG00000007387 (directed) ENSDARG00000094646	0.0139012	family
si:dkey-111e8.1	1.18333	irf2a	directed	ENSDARG00000007387 (directed) ENSDARG00000094018	false	directed	ENSDARG00000007387 (directed) ENSDARG00000094018	0.0458289	family
si:ch73-209l12.1	1.97778	irf2a	directed	ENSDARG00000007387 (directed) ENSDARG00000092776	false	directed	ENSDARG00000007387 (directed) ENSDARG00000092776	0.0614488	family
si:dkey-108k21.17	1.24583	irf2a	directed	ENSDARG00000007387 (directed) ENSDARG00000092743	false	directed	ENSDARG00000007387 (directed) ENSDARG00000092743	0.0637407	family
thbd	1	irf2a	directed	ENSDARG00000007387 (directed) ENSDARG00000092470	false	directed	ENSDARG00000007387 (directed) ENSDARG00000092470	0.0274247	family
ENSDARG00000092246	2.61667	irf2a	directed	ENSDARG00000007387 (directed) ENSDARG00000092246	false	directed	ENSDARG00000007387 (directed) ENSDARG00000092246	0.0223378	family
LOC100535981	1.09091	irf2a	directed	ENSDARG00000007387 (directed) ENSDARG00000092199	false	directed	ENSDARG00000007387 (directed) ENSDARG00000092199	0.0175629	family
zbtb40	1.08333	irf2a	directed	ENSDARG00000007387 (directed) ENSDARG00000091762	false	directed	ENSDARG00000007387 (directed) ENSDARG00000091762	0.013488	family
lsm8	1.24286	irf2a	directed	ENSDARG00000007387 (directed) ENSDARG00000091656	false	directed	ENSDARG00000007387 (directed) ENSDARG00000091656	0.0421377	family
xrn1	1.22549	irf2a	directed	ENSDARG00000007387 (directed) ENSDARG00000091652	false	directed	ENSDARG00000007387 (directed) ENSDARG00000091652	0.0589926	family
si:ch73-352p4.5	1.94405	irf2a	directed	ENSDARG00000007387 (directed) ENSDARG00000091640	false	directed	ENSDARG00000007387 (directed) ENSDARG00000091640	0.0550378	family
nfrkb	1	irf2a	directed	ENSDARG00000007387 (directed) ENSDARG00000091512	false	directed	ENSDARG00000007387 (directed) ENSDARG00000091512	0.0637408	family
prpf6	1.4373	irf2a	directed	ENSDARG00000007387 (directed) ENSDARG00000091367	false	directed	ENSDARG00000007387 (directed) ENSDARG00000091367	0.0346162	family
cry1bb	1.30202	irf2a	directed	ENSDARG00000007387 (directed) ENSDARG00000091131	false	directed	ENSDARG00000007387 (directed) ENSDARG00000091131	0.0256437	family
zcchc10	6.96389	irf2a	directed	ENSDARG00000007387 (directed) ENSDARG00000091092	false	directed	ENSDARG00000007387 (directed) ENSDARG00000091092	0.0477172	family
il34	1	irf2a	directed	ENSDARG00000007387 (directed) ENSDARG00000091003	false	directed	ENSDARG00000007387 (directed) ENSDARG00000091003	0.0484778	family
parm1	1.07143	irf2a	directed	ENSDARG00000007387 (directed) ENSDARG00000090996	false	directed	ENSDARG00000007387 (directed) ENSDARG00000090996	0.0535786	family
si:dkeyp-115e12.6	1.17424	irf2a	directed	ENSDARG00000007387 (directed) ENSDARG00000090986	false	directed	ENSDARG00000007387 (directed) ENSDARG00000090986	0.0847101	family
plk2a	1	irf2a	directed	ENSDARG00000007387 (directed) ENSDARG00000090752	false	directed	ENSDARG00000007387 (directed) ENSDARG00000090752	0.042529	family
MGC173646	2.94597	irf2a	directed	ENSDARG00000007387 (directed) ENSDARG00000090689	false	directed	ENSDARG00000007387 (directed) ENSDARG00000090689	0.0526758	family
mir222	1.125	irf2a	directed	ENSDARG00000007387 (directed) ENSDARG00000090347	false	directed	ENSDARG00000007387 (directed) ENSDARG00000090347	0.00520528	family
wu:fb39e10	1.53611	irf2a	directed	ENSDARG00000007387 (directed) ENSDARG00000089967	false	directed	ENSDARG00000007387 (directed) ENSDARG00000089967	0.0647138	family
ENSDARG00000089963	1.07692	irf2a	directed	ENSDARG00000007387 (directed) ENSDARG00000089963	false	directed	ENSDARG00000007387 (directed) ENSDARG00000089963	0.0560869	family
dsn1	1	irf2a	directed	ENSDARG00000007387 (directed) ENSDARG00000089922	false	directed	ENSDARG00000007387 (directed) ENSDARG00000089922	0.0575909	family
si:ch211-265o23.1	1.30556	irf2a	directed	ENSDARG00000007387 (directed) ENSDARG00000089908	false	directed	ENSDARG00000007387 (directed) ENSDARG00000089908	0.0581248	family
akap1a	1.41071	irf2a	directed	ENSDARG00000007387 (directed) ENSDARG00000089802	false	directed	ENSDARG00000007387 (directed) ENSDARG00000089802	0.0134598	family
trabd2a	1.09091	irf2a	directed	ENSDARG00000007387 (directed) ENSDARG00000089701	false	directed	ENSDARG00000007387 (directed) ENSDARG00000089701	0.0455854	family
ENSDARG00000089622	1.5	irf2a	directed	ENSDARG00000007387 (directed) ENSDARG00000089622	false	directed	ENSDARG00000007387 (directed) ENSDARG00000089622	0.0473656	family
ogmb	2.4193	irf2a	directed	ENSDARG00000007387 (directed) ENSDARG00000089444	false	directed	ENSDARG00000007387 (directed) ENSDARG00000089444	0.0130742	family
ushbp1	1.49167	irf2a	directed	ENSDARG00000007387 (directed) ENSDARG00000089071	false	directed	ENSDARG00000007387 (directed) ENSDARG00000089071	0.0188612	family
si:ch211-168f7.5	1	irf2a	directed	ENSDARG00000007387 (directed) ENSDARG00000088195	false	directed	ENSDARG00000007387 (directed) ENSDARG00000088195	0.071538	family
kdm6ba	1.08333	irf2a	directed	ENSDARG00000007387 (directed) ENSDARG00000088087	false	directed	ENSDARG00000007387 (directed) ENSDARG00000088087	0.0418602	family
rpap3	1.25397	irf2a	directed	ENSDARG00000007387 (directed) ENSDARG00000087962	false	directed	ENSDARG00000007387 (directed) ENSDARG00000087962	0.0334365	family
plekhn1	1.07692	irf2a	directed	ENSDARG00000007387 (directed) ENSDARG00000087844	false	directed	ENSDARG00000007387 (directed) ENSDARG00000087844	0.042568	family
rfwd3	1.56786	irf2a	directed	ENSDARG00000007387 (directed) ENSDARG00000087752	false	directed	ENSDARG00000007387 (directed) ENSDARG00000087752	0.0255131	family
atxn1l	1.125	irf2a	directed	ENSDARG00000007387 (directed) ENSDARG00000086977	false	directed	ENSDARG00000007387 (directed) ENSDARG00000086977	0.0410013	family
ENSDARG00000086708	1.20529	irf2a	directed	ENSDARG00000007387 (directed) ENSDARG00000086708	false	directed	ENSDARG00000007387 (directed) ENSDARG00000086708	0.0509936	family
ice2	1.40278	irf2a	directed	ENSDARG00000007387 (directed) ENSDARG00000086670	false	directed	ENSDARG00000007387 (directed) ENSDARG00000086670	0.0254485	family
gpr156	1	irf2a	directed	ENSDARG00000007387 (directed) ENSDARG00000086215	false	directed	ENSDARG00000007387 (directed) ENSDARG00000086215	0.0206655	family
dhx9	1.46859	irf2a	directed	ENSDARG00000007387 (directed) ENSDARG00000079725	false	directed	ENSDARG00000007387 (directed) ENSDARG00000079725	0.117265	family
elf2b	129.371	irf2a	directed	ENSDARG00000007387 (directed) ENSDARG00000079626	false	directed	ENSDARG00000007387 (directed) ENSDARG00000079626	0.0454736	family
atr	1.35877	irf2a	directed	ENSDARG00000007387 (directed) ENSDARG00000079625	false	directed	ENSDARG00000007387 (directed) ENSDARG00000079625	0.0214019	family
gatsl3	1.1	irf2a	directed	ENSDARG00000007387 (directed) ENSDARG00000079588	false	directed	ENSDARG00000007387 (directed) ENSDARG00000079588	0.0238823	family
pkn3	1	irf2a	directed	ENSDARG00000007387 (directed) ENSDARG00000079585	false	directed	ENSDARG00000007387 (directed) ENSDARG00000079585	0.0392384	family
si:ch211-132p1.2	1.06667	irf2a	directed	ENSDARG00000007387 (directed) ENSDARG00000079399	false	directed	ENSDARG00000007387 (directed) ENSDARG00000079399	0.0445111	family
flrt2	1.1	irf2a	directed	ENSDARG00000007387 (directed) ENSDARG00000079355	false	directed	ENSDARG00000007387 (directed) ENSDARG00000079355	0.0734176	family
kmt2ca	1	irf2a	directed	ENSDARG00000007387 (directed) ENSDARG00000079312	false	directed	ENSDARG00000007387 (directed) ENSDARG00000079312	0.0459811	family
rlim	1	irf2a	directed	ENSDARG00000007387 (directed) ENSDARG00000079306	false	directed	ENSDARG00000007387 (directed) ENSDARG00000079306	0.0212095	family
brca2	1.06667	irf2a	directed	ENSDARG00000007387 (directed) ENSDARG00000079015	false	directed	ENSDARG00000007387 (directed) ENSDARG00000079015	0.0297942	family
fam118b	1.30278	irf2a	directed	ENSDARG00000007387 (directed) ENSDARG00000078983	false	directed	ENSDARG00000007387 (directed) ENSDARG00000078983	0.0462477	family
supt20	1.09091	irf2a	directed	ENSDARG00000007387 (directed) ENSDARG00000078658	false	directed	ENSDARG00000007387 (directed) ENSDARG00000078658	0.0376401	family
zgc:195081	1.32702	irf2a	directed	ENSDARG00000007387 (directed) ENSDARG00000078481	false	directed	ENSDARG00000007387 (directed) ENSDARG00000078481	0.029289	family
oat	1	irf2a	directed	ENSDARG00000007387 (directed) ENSDARG00000078425	false	directed	ENSDARG00000007387 (directed) ENSDARG00000078425	0.0268815	family
hspb15	1.40758	irf2a	directed	ENSDARG00000007387 (directed) ENSDARG00000078411	false	directed	ENSDARG00000007387 (directed) ENSDARG00000078411	0.0391475	family
larp4aa	1	irf2a	directed	ENSDARG00000007387 (directed) ENSDARG00000078401	false	directed	ENSDARG00000007387 (directed) ENSDARG00000078401	0.0373046	family
sec22a	1.31591	irf2a	directed	ENSDARG00000007387 (directed) ENSDARG00000078328	false	directed	ENSDARG00000007387 (directed) ENSDARG00000078328	0.0273439	family
ptgfrn	1.47724	irf2a	directed	ENSDARG00000007387 (directed) ENSDARG00000078172	false	directed	ENSDARG00000007387 (directed) ENSDARG00000078172	0.0433018	family
mrc2	1.44968	irf2a	directed	ENSDARG00000007387 (directed) ENSDARG00000078135	false	directed	ENSDARG00000007387 (directed) ENSDARG00000078135	0.074532	family
limd2	1.1	irf2a	directed	ENSDARG00000007387 (directed) ENSDARG00000078092	false	directed	ENSDARG00000007387 (directed) ENSDARG00000078092	0.0630527	family
si:dkey-6i22.5	1.47619	irf2a	directed	ENSDARG00000007387 (directed) ENSDARG00000077822	false	directed	ENSDARG00000007387 (directed) ENSDARG00000077822	0.0451173	family
hgsnat	1.11111	irf2a	directed	ENSDARG00000007387 (directed) ENSDARG00000077804	false	directed	ENSDARG00000007387 (directed) ENSDARG00000077804	0.052987	family
arhgef10	1.33377	irf2a	directed	ENSDARG00000007387 (directed) ENSDARG00000077788	false	directed	ENSDARG00000007387 (directed) ENSDARG00000077788	0.0325748	family
rin3	1.05556	irf2a	directed	ENSDARG00000007387 (directed) ENSDARG00000077618	false	directed	ENSDARG00000007387 (directed) ENSDARG00000077618	0.0187843	family
zzz3	1	irf2a	directed	ENSDARG00000007387 (directed) ENSDARG00000077581	false	directed	ENSDARG00000007387 (directed) ENSDARG00000077581	0.0765002	family
pign	1.38139	irf2a	directed	ENSDARG00000007387 (directed) ENSDARG00000077532	false	directed	ENSDARG00000007387 (directed) ENSDARG00000077532	0.0482157	family
ahctf1	1.21978	irf2a	directed	ENSDARG00000007387 (directed) ENSDARG00000077530	false	directed	ENSDARG00000007387 (directed) ENSDARG00000077530	0.0904348	family
hip1ra	1.125	irf2a	directed	ENSDARG00000007387 (directed) ENSDARG00000077445	false	directed	ENSDARG00000007387 (directed) ENSDARG00000077445	0.0267814	family
rassf10a	1	irf2a	directed	ENSDARG00000007387 (directed) ENSDARG00000077424	false	directed	ENSDARG00000007387 (directed) ENSDARG00000077424	0.0188822	family
bptf	1.08333	irf2a	directed	ENSDARG00000007387 (directed) ENSDARG00000077361	false	directed	ENSDARG00000007387 (directed) ENSDARG00000077361	0.0805697	family
tmem201	1.1	irf2a	directed	ENSDARG00000007387 (directed) ENSDARG00000077307	false	directed	ENSDARG00000007387 (directed) ENSDARG00000077307	0.0236684	family
si:ch211-160o17.4	1.11111	irf2a	directed	ENSDARG00000007387 (directed) ENSDARG00000077095	false	directed	ENSDARG00000007387 (directed) ENSDARG00000077095	0.0329799	family
blm	1.12955	irf2a	directed	ENSDARG00000007387 (directed) ENSDARG00000077089	false	directed	ENSDARG00000007387 (directed) ENSDARG00000077089	0.0671626	family
esco1	1.23333	irf2a	directed	ENSDARG00000007387 (directed) ENSDARG00000077057	false	directed	ENSDARG00000007387 (directed) ENSDARG00000077057	0.032246	family
pbrm1l	1.89167	irf2a	directed	ENSDARG00000007387 (directed) ENSDARG00000077038	false	directed	ENSDARG00000007387 (directed) ENSDARG00000077038	0.0953894	family
cep70	1.2631	irf2a	directed	ENSDARG00000007387 (directed) ENSDARG00000076965	false	directed	ENSDARG00000007387 (directed) ENSDARG00000076965	0.0218105	family
kel	1.4218	irf2a	directed	ENSDARG00000007387 (directed) ENSDARG00000076950	false	directed	ENSDARG00000007387 (directed) ENSDARG00000076950	0.0301672	family
igdcc4	1.25	irf2a	directed	ENSDARG00000007387 (directed) ENSDARG00000076919	false	directed	ENSDARG00000007387 (directed) ENSDARG00000076919	0.0693945	family
ralgapa1	1.20202	irf2a	directed	ENSDARG00000007387 (directed) ENSDARG00000076889	false	directed	ENSDARG00000007387 (directed) ENSDARG00000076889	0.0362743	family
arap3	1.08333	irf2a	directed	ENSDARG00000007387 (directed) ENSDARG00000076801	false	directed	ENSDARG00000007387 (directed) ENSDARG00000076801	0.0449968	family
prkra	1.13575	irf2a	directed	ENSDARG00000007387 (directed) ENSDARG00000076718	false	directed	ENSDARG00000007387 (directed) ENSDARG00000076718	0.0421176	family
plagl2	1.31303	irf2a	directed	ENSDARG00000007387 (directed) ENSDARG00000076657	false	directed	ENSDARG00000007387 (directed) ENSDARG00000076657	0.0854234	family
dusp12	1.05882	irf2a	directed	ENSDARG00000007387 (directed) ENSDARG00000076330	false	directed	ENSDARG00000007387 (directed) ENSDARG00000076330	0.0192204	family
lmtk2	1.16026	irf2a	directed	ENSDARG00000007387 (directed) ENSDARG00000076324	false	directed	ENSDARG00000007387 (directed) ENSDARG00000076324	0.037363	family
mmrn2a	1	irf2a	directed	ENSDARG00000007387 (directed) ENSDARG00000076135	false	directed	ENSDARG00000007387 (directed) ENSDARG00000076135	0.0414142	family
pappa2	1.05882	irf2a	directed	ENSDARG00000007387 (directed) ENSDARG00000076020	false	directed	ENSDARG00000007387 (directed) ENSDARG00000076020	0.0327408	family
pigt	1.29643	irf2a	directed	ENSDARG00000007387 (directed) ENSDARG00000075842	false	directed	ENSDARG00000007387 (directed) ENSDARG00000075842	0.0178575	family
zfyve16	2.08452	irf2a	directed	ENSDARG00000007387 (directed) ENSDARG00000075747	false	directed	ENSDARG00000007387 (directed) ENSDARG00000075747	0.0389107	family
si:ch211-267e7.3	1.09091	irf2a	directed	ENSDARG00000007387 (directed) ENSDARG00000075487	false	directed	ENSDARG00000007387 (directed) ENSDARG00000075487	0.0576697	family
zgc:173587	1.34091	irf2a	directed	ENSDARG00000007387 (directed) ENSDARG00000075482	false	directed	ENSDARG00000007387 (directed) ENSDARG00000075482	0.0619721	family
znf989	2.09286	irf2a	directed	ENSDARG00000007387 (directed) ENSDARG00000075470	false	directed	ENSDARG00000007387 (directed) ENSDARG00000075470	0.0374683	family
naa25	1.42857	irf2a	directed	ENSDARG00000007387 (directed) ENSDARG00000075446	false	directed	ENSDARG00000007387 (directed) ENSDARG00000075446	0.0640688	family
pttg1	1.17692	irf2a	directed	ENSDARG00000007387 (directed) ENSDARG00000075421	false	directed	ENSDARG00000007387 (directed) ENSDARG00000075421	0.0207267	family
espl1	1.38248	irf2a	directed	ENSDARG00000007387 (directed) ENSDARG00000075354	false	directed	ENSDARG00000007387 (directed) ENSDARG00000075354	0.0655743	family
chd7	1	irf2a	directed	ENSDARG00000007387 (directed) ENSDARG00000075211	false	directed	ENSDARG00000007387 (directed) ENSDARG00000075211	0.0848828	family
tmem14ca	1.07143	irf2a	directed	ENSDARG00000007387 (directed) ENSDARG00000075180	false	directed	ENSDARG00000007387 (directed) ENSDARG00000075180	0.0273497	family
mylk5	1.27345	irf2a	directed	ENSDARG00000007387 (directed) ENSDARG00000075164	false	directed	ENSDARG00000007387 (directed) ENSDARG00000075164	0.0436579	family
nanp	1.4623	irf2a	directed	ENSDARG00000007387 (directed) ENSDARG00000075143	false	directed	ENSDARG00000007387 (directed) ENSDARG00000075143	0.0136661	family
LOC108179033	1.25882	irf2a	directed	ENSDARG00000007387 (directed) ENSDARG00000075119	false	directed	ENSDARG00000007387 (directed) ENSDARG00000075119	0.039239	family
rpap1	1.17692	irf2a	directed	ENSDARG00000007387 (directed) ENSDARG00000075072	false	directed	ENSDARG00000007387 (directed) ENSDARG00000075072	0.0616455	family
bub1bb	1.4373	irf2a	directed	ENSDARG00000007387 (directed) ENSDARG00000074927	false	directed	ENSDARG00000007387 (directed) ENSDARG00000074927	0.0777674	family
rasip1	1.0625	irf2a	directed	ENSDARG00000007387 (directed) ENSDARG00000074829	false	directed	ENSDARG00000007387 (directed) ENSDARG00000074829	0.0588523	family
dbf4	1.64444	irf2a	directed	ENSDARG00000007387 (directed) ENSDARG00000074796	false	directed	ENSDARG00000007387 (directed) ENSDARG00000074796	0.0631424	family
arfgef2	1.30556	irf2a	directed	ENSDARG00000007387 (directed) ENSDARG00000074702	false	directed	ENSDARG00000007387 (directed) ENSDARG00000074702	0.0467054	family
pan2	3.31667	irf2a	directed	ENSDARG00000007387 (directed) ENSDARG00000074675	false	directed	ENSDARG00000007387 (directed) ENSDARG00000074675	0.0344159	family
ENSDARG00000074645	1.34091	irf2a	directed	ENSDARG00000007387 (directed) ENSDARG00000074645	false	directed	ENSDARG00000007387 (directed) ENSDARG00000074645	0.0343302	family
cep170b	1.3373	irf2a	directed	ENSDARG00000007387 (directed) ENSDARG00000074636	false	directed	ENSDARG00000007387 (directed) ENSDARG00000074636	0.0627685	family
gpr78a	1.16667	irf2a	directed	ENSDARG00000007387 (directed) ENSDARG00000074600	false	directed	ENSDARG00000007387 (directed) ENSDARG00000074600	0.0411274	family
slc25a38b	1.19091	irf2a	directed	ENSDARG00000007387 (directed) ENSDARG00000074533	false	directed	ENSDARG00000007387 (directed) ENSDARG00000074533	0.0283446	family
zbtb16b	1.125	irf2a	directed	ENSDARG00000007387 (directed) ENSDARG00000074526	false	directed	ENSDARG00000007387 (directed) ENSDARG00000074526	0.0607846	family
eif4g3b	1	irf2a	directed	ENSDARG00000007387 (directed) ENSDARG00000074331	false	directed	ENSDARG00000007387 (directed) ENSDARG00000074331	0.055882	family
mcm8	1.36587	irf2a	directed	ENSDARG00000007387 (directed) ENSDARG00000074326	false	directed	ENSDARG00000007387 (directed) ENSDARG00000074326	0.0716249	family
gpr183b	2.80952	irf2a	directed	ENSDARG00000007387 (directed) ENSDARG00000074302	false	directed	ENSDARG00000007387 (directed) ENSDARG00000074302	0.0218527	family
rap1gap2b	1.625	irf2a	directed	ENSDARG00000007387 (directed) ENSDARG00000074222	false	directed	ENSDARG00000007387 (directed) ENSDARG00000074222	0.0388999	family
rnf26	1.08333	irf2a	directed	ENSDARG00000007387 (directed) ENSDARG00000074074	false	directed	ENSDARG00000007387 (directed) ENSDARG00000074074	0.0209596	family
rbms1a	1.07143	irf2a	directed	ENSDARG00000007387 (directed) ENSDARG00000074023	false	directed	ENSDARG00000007387 (directed) ENSDARG00000074023	0.0112056	family
mctp2b	1.3	irf2a	directed	ENSDARG00000007387 (directed) ENSDARG00000073970	false	directed	ENSDARG00000007387 (directed) ENSDARG00000073970	0.0166762	family
adck2	1.18803	irf2a	directed	ENSDARG00000007387 (directed) ENSDARG00000073923	false	directed	ENSDARG00000007387 (directed) ENSDARG00000073923	0.0321617	family
arhgef7b	1.15341	irf2a	directed	ENSDARG00000007387 (directed) ENSDARG00000073848	false	directed	ENSDARG00000007387 (directed) ENSDARG00000073848	0.0126815	family
zgc:194210	2.03333	irf2a	directed	ENSDARG00000007387 (directed) ENSDARG00000073799	false	directed	ENSDARG00000007387 (directed) ENSDARG00000073799	0.0536056	family
sec24b	1	irf2a	directed	ENSDARG00000007387 (directed) ENSDARG00000071906	false	directed	ENSDARG00000007387 (directed) ENSDARG00000071906	0.0162509	family
mydgf	1.225	irf2a	directed	ENSDARG00000007387 (directed) ENSDARG00000071679	false	directed	ENSDARG00000007387 (directed) ENSDARG00000071679	0.0282368	family
si:dkeyp-87e7.4	1.15758	irf2a	directed	ENSDARG00000007387 (directed) ENSDARG00000071570	false	directed	ENSDARG00000007387 (directed) ENSDARG00000071570	0.0297808	family
zgc:152948	1.19091	irf2a	directed	ENSDARG00000007387 (directed) ENSDARG00000071487	false	directed	ENSDARG00000007387 (directed) ENSDARG00000071487	0.0487984	family
arl6ip6	1.16667	irf2a	directed	ENSDARG00000007387 (directed) ENSDARG00000071013	false	directed	ENSDARG00000007387 (directed) ENSDARG00000071013	0.0322197	family
pmvk	1.75952	irf2a	directed	ENSDARG00000007387 (directed) ENSDARG00000070798	false	directed	ENSDARG00000007387 (directed) ENSDARG00000070798	0.0181453	family
jupa	1.23611	irf2a	directed	ENSDARG00000007387 (directed) ENSDARG00000070787	false	directed	ENSDARG00000007387 (directed) ENSDARG00000070787	0.0469544	family
si:dkey-85p17.3	1.09091	irf2a	directed	ENSDARG00000007387 (directed) ENSDARG00000070601	false	directed	ENSDARG00000007387 (directed) ENSDARG00000070601	0.0584668	family
atad5a	1.50162	irf2a	directed	ENSDARG00000007387 (directed) ENSDARG00000070568	false	directed	ENSDARG00000007387 (directed) ENSDARG00000070568	0.0852049	family
fip1l1b	1.16234	irf2a	directed	ENSDARG00000007387 (directed) ENSDARG00000070431	false	directed	ENSDARG00000007387 (directed) ENSDARG00000070431	0.0445993	family
si:dkey-261m9.19	1.11111	irf2a	directed	ENSDARG00000007387 (directed) ENSDARG00000070254	false	directed	ENSDARG00000007387 (directed) ENSDARG00000070254	0.0678397	family
casc5	2.01322	irf2a	directed	ENSDARG00000007387 (directed) ENSDARG00000070239	false	directed	ENSDARG00000007387 (directed) ENSDARG00000070239	0.0862915	family
rpp25l	1.11111	irf2a	directed	ENSDARG00000007387 (directed) ENSDARG00000070131	false	directed	ENSDARG00000007387 (directed) ENSDARG00000070131	0.0183348	family
ptpn23a	1.48869	irf2a	directed	ENSDARG00000007387 (directed) ENSDARG00000070124	false	directed	ENSDARG00000007387 (directed) ENSDARG00000070124	0.0593877	family
taf15	1.49008	irf2a	directed	ENSDARG00000007387 (directed) ENSDARG00000070019	false	directed	ENSDARG00000007387 (directed) ENSDARG00000070019	0.10045	family
si:ch211-145b13.6	1.08333	irf2a	directed	ENSDARG00000007387 (directed) ENSDARG00000069998	false	directed	ENSDARG00000007387 (directed) ENSDARG00000069998	0.0268393	family
cysltr2a	1.34286	irf2a	directed	ENSDARG00000007387 (directed) ENSDARG00000069800	false	directed	ENSDARG00000007387 (directed) ENSDARG00000069800	0.0338489	family
foxi2	1.1	irf2a	directed	ENSDARG00000007387 (directed) ENSDARG00000069715	false	directed	ENSDARG00000007387 (directed) ENSDARG00000069715	0.0159211	family
pcgf6	1.22222	irf2a	directed	ENSDARG00000007387 (directed) ENSDARG00000069681	false	directed	ENSDARG00000007387 (directed) ENSDARG00000069681	0.0543894	family
vegfc	1.1	irf2a	directed	ENSDARG00000007387 (directed) ENSDARG00000069640	false	directed	ENSDARG00000007387 (directed) ENSDARG00000069640	0.0133089	family
mus81	1.48016	irf2a	directed	ENSDARG00000007387 (directed) ENSDARG00000069326	false	directed	ENSDARG00000007387 (directed) ENSDARG00000069326	0.0849067	family
pdia5	1.6618	irf2a	directed	ENSDARG00000007387 (directed) ENSDARG00000069242	false	directed	ENSDARG00000007387 (directed) ENSDARG00000069242	0.011531	family
aars	1.19444	irf2a	directed	ENSDARG00000007387 (directed) ENSDARG00000069142	false	directed	ENSDARG00000007387 (directed) ENSDARG00000069142	0.0408535	family
masp1	1.37897	irf2a	directed	ENSDARG00000007387 (directed) ENSDARG00000068726	false	directed	ENSDARG00000007387 (directed) ENSDARG00000068726	0.0429685	family
fam214b	1.67619	irf2a	directed	ENSDARG00000007387 (directed) ENSDARG00000068650	false	directed	ENSDARG00000007387 (directed) ENSDARG00000068650	0.0328528	family
gucd1	1.15	irf2a	directed	ENSDARG00000007387 (directed) ENSDARG00000068438	false	directed	ENSDARG00000007387 (directed) ENSDARG00000068438	0.0365256	family
LOC100149117	1.125	irf2a	directed	ENSDARG00000007387 (directed) ENSDARG00000068417	false	directed	ENSDARG00000007387 (directed) ENSDARG00000068417	0.056092	family
ENSDARG00000068082	1.07143	irf2a	directed	ENSDARG00000007387 (directed) ENSDARG00000068082	false	directed	ENSDARG00000007387 (directed) ENSDARG00000068082	0.0178902	family
cdk12	1	irf2a	directed	ENSDARG00000007387 (directed) ENSDARG00000063726	false	directed	ENSDARG00000007387 (directed) ENSDARG00000063726	0.100551	family
rreb1a	1.35877	irf2a	directed	ENSDARG00000007387 (directed) ENSDARG00000063701	false	directed	ENSDARG00000007387 (directed) ENSDARG00000063701	0.0375304	family
antxr1c	1.07692	irf2a	directed	ENSDARG00000007387 (directed) ENSDARG00000063612	false	directed	ENSDARG00000007387 (directed) ENSDARG00000063612	0.0671779	family
sgk2a	1	irf2a	directed	ENSDARG00000007387 (directed) ENSDARG00000063370	false	directed	ENSDARG00000007387 (directed) ENSDARG00000063370	0.0461676	family
ppwd1	1.3	irf2a	directed	ENSDARG00000007387 (directed) ENSDARG00000063161	false	directed	ENSDARG00000007387 (directed) ENSDARG00000063161	0.0234971	family
ubn2a	1	irf2a	directed	ENSDARG00000007387 (directed) ENSDARG00000063062	false	directed	ENSDARG00000007387 (directed) ENSDARG00000063062	0.0772061	family
tyw1	1.07143	irf2a	directed	ENSDARG00000007387 (directed) ENSDARG00000062987	false	directed	ENSDARG00000007387 (directed) ENSDARG00000062987	0.0414534	family
kmt2ba	1.56993	irf2a	directed	ENSDARG00000007387 (directed) ENSDARG00000062962	false	directed	ENSDARG00000007387 (directed) ENSDARG00000062962	0.0771144	family
plekhg7	1.9386	irf2a	directed	ENSDARG00000007387 (directed) ENSDARG00000062855	false	directed	ENSDARG00000007387 (directed) ENSDARG00000062855	0.040333	family
rif1	1.17143	irf2a	directed	ENSDARG00000007387 (directed) ENSDARG00000062650	false	directed	ENSDARG00000007387 (directed) ENSDARG00000062650	0.0486509	family
zc3h18	1.14973	irf2a	directed	ENSDARG00000007387 (directed) ENSDARG00000062506	false	directed	ENSDARG00000007387 (directed) ENSDARG00000062506	0.0476312	family
2008-03-01	1.31313	irf2a	directed	ENSDARG00000007387 (directed) ENSDARG00000062489	false	directed	ENSDARG00000007387 (directed) ENSDARG00000062489	0.0452087	family
bcl2l13	1.11111	irf2a	directed	ENSDARG00000007387 (directed) ENSDARG00000062370	false	directed	ENSDARG00000007387 (directed) ENSDARG00000062370	0.0163558	family
jarid2b	1.11111	irf2a	directed	ENSDARG00000007387 (directed) ENSDARG00000062268	false	directed	ENSDARG00000007387 (directed) ENSDARG00000062268	0.0792445	family
edc4	1.19444	irf2a	directed	ENSDARG00000007387 (directed) ENSDARG00000062266	false	directed	ENSDARG00000007387 (directed) ENSDARG00000062266	0.0499505	family
setd2	1.06667	irf2a	directed	ENSDARG00000007387 (directed) ENSDARG00000062244	false	directed	ENSDARG00000007387 (directed) ENSDARG00000062244	0.0787806	family
vrtn	1.20833	irf2a	directed	ENSDARG00000007387 (directed) ENSDARG00000061963	false	directed	ENSDARG00000007387 (directed) ENSDARG00000061963	0.0337308	family
cnot2	1.33611	irf2a	directed	ENSDARG00000007387 (directed) ENSDARG00000061802	false	directed	ENSDARG00000007387 (directed) ENSDARG00000061802	0.038092	family
kdm6a	1.07692	irf2a	directed	ENSDARG00000007387 (directed) ENSDARG00000061759	false	directed	ENSDARG00000007387 (directed) ENSDARG00000061759	0.0853062	family
LOC100333227	1.5873	irf2a	directed	ENSDARG00000007387 (directed) ENSDARG00000061660	false	directed	ENSDARG00000007387 (directed) ENSDARG00000061660	0.0516133	family
ncaph	1.23611	irf2a	directed	ENSDARG00000007387 (directed) ENSDARG00000061468	false	directed	ENSDARG00000007387 (directed) ENSDARG00000061468	0.0894821	family
si:dkey-202e22.2	1.18803	irf2a	directed	ENSDARG00000007387 (directed) ENSDARG00000061260	false	directed	ENSDARG00000007387 (directed) ENSDARG00000061260	0.0646851	family
gfod2	1	irf2a	directed	ENSDARG00000007387 (directed) ENSDARG00000061145	false	directed	ENSDARG00000007387 (directed) ENSDARG00000061145	0.0126683	family
nars	1.25	irf2a	directed	ENSDARG00000007387 (directed) ENSDARG00000061100	false	directed	ENSDARG00000007387 (directed) ENSDARG00000061100	0.0329672	family
stk36	1.11111	irf2a	directed	ENSDARG00000007387 (directed) ENSDARG00000061095	false	directed	ENSDARG00000007387 (directed) ENSDARG00000061095	0.0128947	family
nemp2	1.17778	irf2a	directed	ENSDARG00000007387 (directed) ENSDARG00000061062	false	directed	ENSDARG00000007387 (directed) ENSDARG00000061062	0.0492408	family
rabggta	1.07143	irf2a	directed	ENSDARG00000007387 (directed) ENSDARG00000061024	false	directed	ENSDARG00000007387 (directed) ENSDARG00000061024	0.0246643	family
spns2	1.41026	irf2a	directed	ENSDARG00000007387 (directed) ENSDARG00000061017	false	directed	ENSDARG00000007387 (directed) ENSDARG00000061017	0.061367	family
rpusd2	1	irf2a	directed	ENSDARG00000007387 (directed) ENSDARG00000060992	false	directed	ENSDARG00000007387 (directed) ENSDARG00000060992	0.00777121	family
atp2a3	1.09091	irf2a	directed	ENSDARG00000007387 (directed) ENSDARG00000060978	false	directed	ENSDARG00000007387 (directed) ENSDARG00000060978	0.0453201	family
znf346	1.09091	irf2a	directed	ENSDARG00000007387 (directed) ENSDARG00000060695	false	directed	ENSDARG00000007387 (directed) ENSDARG00000060695	0.0445025	family
klf8	68.1457	irf2a	directed	ENSDARG00000007387 (directed) ENSDARG00000060661	false	directed	ENSDARG00000007387 (directed) ENSDARG00000060661	0.0828293	family
tmem229b	1	irf2a	directed	ENSDARG00000007387 (directed) ENSDARG00000060569	false	directed	ENSDARG00000007387 (directed) ENSDARG00000060569	0.0305088	family
atad2b	1	irf2a	directed	ENSDARG00000007387 (directed) ENSDARG00000060537	false	directed	ENSDARG00000007387 (directed) ENSDARG00000060537	0.0766698	family
eprs	1.1381	irf2a	directed	ENSDARG00000007387 (directed) ENSDARG00000060494	false	directed	ENSDARG00000007387 (directed) ENSDARG00000060494	0.0416154	family
tbl1x	1.14583	irf2a	directed	ENSDARG00000007387 (directed) ENSDARG00000060438	false	directed	ENSDARG00000007387 (directed) ENSDARG00000060438	0.047722	family
mtfr2	1.14286	irf2a	directed	ENSDARG00000007387 (directed) ENSDARG00000060394	false	directed	ENSDARG00000007387 (directed) ENSDARG00000060394	0.0585388	family
wdr62	1.08333	irf2a	directed	ENSDARG00000007387 (directed) ENSDARG00000060312	false	directed	ENSDARG00000007387 (directed) ENSDARG00000060312	0.0508927	family
nin	1.11111	irf2a	directed	ENSDARG00000007387 (directed) ENSDARG00000060298	false	directed	ENSDARG00000007387 (directed) ENSDARG00000060298	0.0905572	family
crb2a	1.30358	irf2a	directed	ENSDARG00000007387 (directed) ENSDARG00000060106	false	directed	ENSDARG00000007387 (directed) ENSDARG00000060106	0.04695	family
btaf1	1.14216	irf2a	directed	ENSDARG00000007387 (directed) ENSDARG00000060089	false	directed	ENSDARG00000007387 (directed) ENSDARG00000060089	0.0291858	family
papd5	1.07692	irf2a	directed	ENSDARG00000007387 (directed) ENSDARG00000060071	false	directed	ENSDARG00000007387 (directed) ENSDARG00000060071	0.0114379	family
fam222ba	1.08333	irf2a	directed	ENSDARG00000007387 (directed) ENSDARG00000059886	false	directed	ENSDARG00000007387 (directed) ENSDARG00000059886	0.0661173	family
nprl2	1.68377	irf2a	directed	ENSDARG00000007387 (directed) ENSDARG00000059613	false	directed	ENSDARG00000007387 (directed) ENSDARG00000059613	0.0143366	family
wbscr16	1.11111	irf2a	directed	ENSDARG00000007387 (directed) ENSDARG00000059583	false	directed	ENSDARG00000007387 (directed) ENSDARG00000059583	0.0123394	family
smtnb	1.08333	irf2a	directed	ENSDARG00000007387 (directed) ENSDARG00000059442	false	directed	ENSDARG00000007387 (directed) ENSDARG00000059442	0.0542118	family
hnrnpl2	1.44478	irf2a	directed	ENSDARG00000007387 (directed) ENSDARG00000059303	false	directed	ENSDARG00000007387 (directed) ENSDARG00000059303	0.0645673	family
si:ch211-248e11.2	1.17143	irf2a	directed	ENSDARG00000007387 (directed) ENSDARG00000058940	false	directed	ENSDARG00000007387 (directed) ENSDARG00000058940	0.0354878	family
nhej1	1.14286	irf2a	directed	ENSDARG00000007387 (directed) ENSDARG00000058893	false	directed	ENSDARG00000007387 (directed) ENSDARG00000058893	0.025407	family
ncl1	1	irf2a	directed	ENSDARG00000007387 (directed) ENSDARG00000058861	false	directed	ENSDARG00000007387 (directed) ENSDARG00000058861	0.026076	family
akirin2	1.22222	irf2a	directed	ENSDARG00000007387 (directed) ENSDARG00000058729	false	directed	ENSDARG00000007387 (directed) ENSDARG00000058729	0.0355188	family
si:dkey-119f1.1	1.21591	irf2a	directed	ENSDARG00000007387 (directed) ENSDARG00000058719	false	directed	ENSDARG00000007387 (directed) ENSDARG00000058719	0.0310731	family
terf1	1.38571	irf2a	directed	ENSDARG00000007387 (directed) ENSDARG00000058710	false	directed	ENSDARG00000007387 (directed) ENSDARG00000058710	0.0292768	family
dnajb2	1.0625	irf2a	directed	ENSDARG00000007387 (directed) ENSDARG00000058644	false	directed	ENSDARG00000007387 (directed) ENSDARG00000058644	0.0236117	family
lama5	1.4	irf2a	directed	ENSDARG00000007387 (directed) ENSDARG00000058543	false	directed	ENSDARG00000007387 (directed) ENSDARG00000058543	0.0356129	family
ENSDARG00000058532	1.57202	irf2a	directed	ENSDARG00000007387 (directed) ENSDARG00000058532	false	directed	ENSDARG00000007387 (directed) ENSDARG00000058532	0.0172844	family
sephs1	1.36786	irf2a	directed	ENSDARG00000007387 (directed) ENSDARG00000058292	false	directed	ENSDARG00000007387 (directed) ENSDARG00000058292	0.0495042	family
b3gnt3	1.96579	irf2a	directed	ENSDARG00000007387 (directed) ENSDARG00000058100	false	directed	ENSDARG00000007387 (directed) ENSDARG00000058100	0.019798	family
rprd2a	1.225	irf2a	directed	ENSDARG00000007387 (directed) ENSDARG00000058089	false	directed	ENSDARG00000007387 (directed) ENSDARG00000058089	0.0966262	family
cep350	1	irf2a	directed	ENSDARG00000007387 (directed) ENSDARG00000058000	false	directed	ENSDARG00000007387 (directed) ENSDARG00000058000	0.0404609	family
ints8	2.25397	irf2a	directed	ENSDARG00000007387 (directed) ENSDARG00000057986	false	directed	ENSDARG00000007387 (directed) ENSDARG00000057986	0.0819784	family
si:ch73-181d5.4	1	irf2a	directed	ENSDARG00000007387 (directed) ENSDARG00000057907	false	directed	ENSDARG00000007387 (directed) ENSDARG00000057907	0.0540311	family
dnmt3bb.2	1.07143	irf2a	directed	ENSDARG00000007387 (directed) ENSDARG00000057830	false	directed	ENSDARG00000007387 (directed) ENSDARG00000057830	0.0699871	family
lyz	1.24286	irf2a	directed	ENSDARG00000007387 (directed) ENSDARG00000057789	false	directed	ENSDARG00000007387 (directed) ENSDARG00000057789	0.0607492	family
hells	1.05556	irf2a	directed	ENSDARG00000007387 (directed) ENSDARG00000057738	false	directed	ENSDARG00000007387 (directed) ENSDARG00000057738	0.0782204	family
cxcr4a	1	irf2a	directed	ENSDARG00000007387 (directed) ENSDARG00000057633	false	directed	ENSDARG00000007387 (directed) ENSDARG00000057633	0.0339591	family
polr3c	1.41944	irf2a	directed	ENSDARG00000007387 (directed) ENSDARG00000057562	false	directed	ENSDARG00000007387 (directed) ENSDARG00000057562	0.0347011	family
srsf2a	1.17424	irf2a	directed	ENSDARG00000007387 (directed) ENSDARG00000057484	false	directed	ENSDARG00000007387 (directed) ENSDARG00000057484	0.100274	family
emc1	1.06667	irf2a	directed	ENSDARG00000007387 (directed) ENSDARG00000057255	false	directed	ENSDARG00000007387 (directed) ENSDARG00000057255	0.0635874	family
prep	1.31303	irf2a	directed	ENSDARG00000007387 (directed) ENSDARG00000057151	false	directed	ENSDARG00000007387 (directed) ENSDARG00000057151	0.0409113	family
hpf1	1	irf2a	directed	ENSDARG00000007387 (directed) ENSDARG00000057114	false	directed	ENSDARG00000007387 (directed) ENSDARG00000057114	0.0537511	family
rad9a	1.47619	irf2a	directed	ENSDARG00000007387 (directed) ENSDARG00000056984	false	directed	ENSDARG00000007387 (directed) ENSDARG00000056984	0.0550048	family
pcolcea	1.59683	irf2a	directed	ENSDARG00000007387 (directed) ENSDARG00000056913	false	directed	ENSDARG00000007387 (directed) ENSDARG00000056913	0.0104359	family
zgc:113276	2.02976	irf2a	directed	ENSDARG00000007387 (directed) ENSDARG00000056650	false	directed	ENSDARG00000007387 (directed) ENSDARG00000056650	0.0124298	family
copb1	1.24091	irf2a	directed	ENSDARG00000007387 (directed) ENSDARG00000056557	false	directed	ENSDARG00000007387 (directed) ENSDARG00000056557	0.0154724	family
[truncated: 33,865 more rows]

## Sheet: brown_module_node
			Supplement Table 8. Cytoscape-generated networks of turquoise and brown modules.
name	RNAseq	ATACseq	AverageShortestPathLength	BetweennessCentrality	ClosenessCentrality	ClusteringCoefficient	Eccentricity	EdgeCount	Indegree	IsSingleNode	NeighborhoodConnectivity	Outdegree	PartnerOfMultiEdgedNodePairs	selected	SelfLoops	shared name	Stress	symbol
ENSDARG00000105525			0	0	0	0	0	1	1	false	1299	0	0	false	0	ENSDARG00000105525	0
ENSDARG00000076913			0	0	0	0	0	1	1	false	1220	0	0	false	0	ENSDARG00000076913	0
ENSDARG00000089032			0	0	0	0.416667	0	4	4	false	1296.5	0	0	false	0	ENSDARG00000089032	0
ENSDARG00000087331			0	0	0	0	0	1	1	false	1036	0	0	false	0	ENSDARG00000087331	0
ENSDARG00000103996			0	0	0	0	0	1	1	false	1504	0	0	false	0	ENSDARG00000103996	0
ENSDARG00000098561			0	0	0	0.333333	0	3	3	false	1213	0	0	false	0	ENSDARG00000098561	0
ENSDARG00000092161			0	0	0	0	0	1	1	false	1504	0	0	false	0	ENSDARG00000092161	0
ENSDARG00000061794			0	0	0	0.5	0	2	2	false	1362	0	0	false	0	ENSDARG00000061794	0
ENSDARG00000100679			0	0	0	0.5	0	2	2	false	1142	0	0	false	0	ENSDARG00000100679	0
ENSDARG00000070465			0	0	0	0.5	0	3	3	false	864.667	0	0	false	0	ENSDARG00000070465	0
ENSDARG00000069977			0	0	0	0	0	1	1	false	1066	0	0	false	0	ENSDARG00000069977	0
ENSDARG00000045351			0	0	0	0.433333	0	6	6	false	1279.5	0	0	false	0	ENSDARG00000045351	0
ENSDARG00000102540			0	0	0	0.416667	0	4	4	false	1109.25	0	0	false	0	ENSDARG00000102540	0
ENSDARG00000101010			0	0	0	0	0	1	1	false	1398	0	0	false	0	ENSDARG00000101010	0
ENSDARG00000100375			0	0	0	0.333333	0	3	3	false	1315	0	0	false	0	ENSDARG00000100375	0
ENSDARG00000098059			0	0	0	0	0	2	2	false	1348.5	0	0	false	0	ENSDARG00000098059	0
ENSDARG00000069775			0	0	0	0.5	0	3	3	false	1237.33	0	0	false	0	ENSDARG00000069775	0
ENSDARG00000059398			0	0	0	0.45	0	5	5	false	1306.6	0	0	false	0	ENSDARG00000059398	0
ENSDARG00000105784			0	0	0	0.5	0	7	7	false	1333.43	0	0	false	0	ENSDARG00000105784	0
ENSDARG00000105370			0	0	0	0.5	0	4	4	false	1373.75	0	0	false	0	ENSDARG00000105370	0
ENSDARG00000101722			0	0	0	0.452381	0	7	7	false	1376.86	0	0	false	0	ENSDARG00000101722	0
ENSDARG00000100481			0	0	0	0.5	0	5	5	false	1378.6	0	0	false	0	ENSDARG00000100481	0
ENSDARG00000092651			0	0	0	0.458333	0	9	9	false	1342.11	0	0	false	0	ENSDARG00000092651	0
ENSDARG00000090751			0	0	0	0.5	0	6	6	false	1369.17	0	0	false	0	ENSDARG00000090751	0
ENSDARG00000067560			0	0	0	0.5	0	4	4	false	1411.25	0	0	false	0	ENSDARG00000067560	0
ENSDARG00000062868			0	0	0	0.5	0	8	8	false	1331.62	0	0	false	0	ENSDARG00000062868	0
ENSDARG00000031119			0	0	0	0.5	0	5	5	false	1342.2	0	0	false	0	ENSDARG00000031119	0
ENSDARG00000104869			0	0	0	0.404762	0	7	7	false	1192.14	0	0	false	0	ENSDARG00000104869	0
ENSDARG00000101405			0	0	0	0.416667	0	9	9	false	1229.67	0	0	false	0	ENSDARG00000101405	0
ENSDARG00000079124			0	0	0	0.464286	0	8	8	false	1247.12	0	0	false	0	ENSDARG00000079124	0
ENSDARG00000075883			0	0	0	0.445455	0	11	11	false	1258.18	0	0	false	0	ENSDARG00000075883	0
ENSDARG00000071558			0	0	0	0.5	0	4	4	false	1310.75	0	0	false	0	ENSDARG00000071558	0
ENSDARG00000062801			0	0	0	0.418182	0	11	11	false	1140.36	0	0	false	0	ENSDARG00000062801	0
ENSDARG00000061124			0	0	0	0.433333	0	6	6	false	1274.5	0	0	false	0	ENSDARG00000061124	0
ENSDARG00000057321			0	0	0	0.467949	0	13	13	false	1249.08	0	0	false	0	ENSDARG00000057321	0
ENSDARG00000038980			0	0	0	0.380952	0	7	7	false	1225.43	0	0	false	0	ENSDARG00000038980	0
ENSDARG00000018049			0	0	0	0.5	0	4	4	false	1252.5	0	0	false	0	ENSDARG00000018049	0
ENSDARG00000103046			1	0	1	0	1	5	0	false	19.4	5	0	false	0	ENSDARG00000103046	0
ENSDARG00000105398			0	0	0	0.464286	0	8	8	false	1091.25	0	0	false	0	ENSDARG00000105398	0
ENSDARG00000102859			0	0	0	0.357143	0	8	8	false	930.875	0	0	false	0	ENSDARG00000102859	0
ENSDARG00000093189			0	0	0	0.5	0	3	3	false	595.333	0	0	false	0	ENSDARG00000093189	0
ENSDARG00000091905			0	0	0	0.444444	0	9	9	false	1039.44	0	0	false	0	ENSDARG00000091905	0
ENSDARG00000088420			0	0	0	0.397436	0	13	13	false	1072	0	0	false	0	ENSDARG00000088420	0
ENSDARG00000079263			0	0	0	0.452381	0	15	15	false	1097.27	0	0	false	0	ENSDARG00000079263	0
ENSDARG00000059373			0	0	0	0.433333	0	15	15	false	1028.47	0	0	false	0	ENSDARG00000059373	0
ENSDARG00000105177			0	0	0	0.445055	0	14	14	false	1146.57	0	0	false	0	ENSDARG00000105177	0
ENSDARG00000104178			0	0	0	0.416667	0	9	9	false	1180	0	0	false	0	ENSDARG00000104178	0
ENSDARG00000103933			0	0	0	0	0	1	1	false	1333	0	0	false	0	ENSDARG00000103933	0
ENSDARG00000103841			0	0	0	0.5	0	4	4	false	1086	0	0	false	0	ENSDARG00000103841	0
ENSDARG00000102917			0	0	0	0.416667	0	4	4	false	1395	0	0	false	0	ENSDARG00000102917	0
ENSDARG00000101118			0	0	0	0.47619	0	7	7	false	1283	0	0	false	0	ENSDARG00000101118	0
ENSDARG00000099109			0	0	0	0.466667	0	6	6	false	1315.67	0	0	false	0	ENSDARG00000099109	0
ENSDARG00000098924			0	0	0	0.5	0	6	6	false	1259.5	0	0	false	0	ENSDARG00000098924	0
ENSDARG00000097493			0	0	0	0.423077	0	13	13	false	1091.23	0	0	false	0	ENSDARG00000097493	0
ENSDARG00000096355			0	0	0	0.4	0	5	5	false	1229	0	0	false	0	ENSDARG00000096355	0
ENSDARG00000094975			0	0	0	0.442308	0	13	13	false	1148.85	0	0	false	0	ENSDARG00000094975	0
ENSDARG00000089586			0	0	0	0.466667	0	16	16	false	1196.38	0	0	false	0	ENSDARG00000089586	0
ENSDARG00000089124			0	0	0	0.380952	0	7	7	false	1352.43	0	0	false	0	ENSDARG00000089124	0
ENSDARG00000087956			0	0	0	0.45	0	16	16	false	1154.81	0	0	false	0	ENSDARG00000087956	0
ENSDARG00000087529			0	0	0	0.414286	0	15	15	false	1121.73	0	0	false	0	ENSDARG00000087529	0
ENSDARG00000078647			0	0	0	0.393939	0	12	12	false	1279	0	0	false	0	ENSDARG00000078647	0
ENSDARG00000068436			0	0	0	0.385965	0	19	19	false	1109.42	0	0	false	0	ENSDARG00000068436	0
ENSDARG00000063297			0	0	0	0.35	0	5	5	false	1142.4	0	0	false	0	ENSDARG00000063297	0
ENSDARG00000062269			0	0	0	0.5	0	4	4	false	1280.75	0	0	false	0	ENSDARG00000062269	0
ENSDARG00000061114			0	0	0	0.25	0	4	4	false	1305	0	0	false	0	ENSDARG00000061114	0
ENSDARG00000058461			0	0	0	0.466667	0	6	6	false	1354.5	0	0	false	0	ENSDARG00000058461	0
ENSDARG00000057395			0	0	0	0.466667	0	6	6	false	1354.5	0	0	false	0	ENSDARG00000057395	0
ENSDARG00000056923			0	0	0	0.5	0	3	3	false	1326.33	0	0	false	0	ENSDARG00000056923	0
ENSDARG00000056838			0	0	0	0.333333	0	3	3	false	1343.33	0	0	false	0	ENSDARG00000056838	0
ENSDARG00000042120			0	0	0	0.430556	0	9	9	false	1322.33	0	0	false	0	ENSDARG00000042120	0
ENSDARG00000037318			0	0	0	0.5	0	3	3	false	1232.67	0	0	false	0	ENSDARG00000037318	0
ENSDARG00000035330			0	0	0	0.4	0	11	11	false	1325.73	0	0	false	0	ENSDARG00000035330	0
ENSDARG00000033012			0	0	0	0.466667	0	6	6	false	1371	0	0	false	0	ENSDARG00000033012	0
ENSDARG00000031560			0	0	0	0.416667	0	4	4	false	1273.25	0	0	false	0	ENSDARG00000031560	0
ENSDARG00000027938			0	0	0	0.372727	0	11	11	false	1230.45	0	0	false	0	ENSDARG00000027938	0
ENSDARG00000026454			0	0	0	0.444444	0	9	9	false	1179.67	0	0	false	0	ENSDARG00000026454	0
ENSDARG00000024904			0	0	0	0.3	0	6	6	false	764.833	0	0	false	0	ENSDARG00000024904	0
ENSDARG00000013434			0	0	0	0.5	0	4	4	false	1139	0	0	false	0	ENSDARG00000013434	0
ENSDARG00000013025			0	0	0	0.3	0	10	10	false	790.5	0	0	false	0	ENSDARG00000013025	0
ENSDARG00000105310			0	0	0	0.5	0	5	5	false	1402	0	0	false	0	ENSDARG00000105310	0
ENSDARG00000105293			0	0	0	0.403846	0	13	13	false	1244.46	0	0	false	0	ENSDARG00000105293	0
ENSDARG00000104960			0	0	0	0.5	0	6	6	false	1401.33	0	0	false	0	ENSDARG00000104960	0
ENSDARG00000103834			0	0	0	0.303571	0	8	8	false	1210	0	0	false	0	ENSDARG00000103834	0
ENSDARG00000102624			0	0	0	0.375	0	8	8	false	1236.5	0	0	false	0	ENSDARG00000102624	0
ENSDARG00000101244			0	0	0	0.441176	0	17	17	false	1295.47	0	0	false	0	ENSDARG00000101244	0
ENSDARG00000101126			0	0	0	0.411111	0	10	10	false	1294.9	0	0	false	0	ENSDARG00000101126	0
ENSDARG00000100577			0	0	0	0.401515	0	12	12	false	1249.42	0	0	false	0	ENSDARG00000100577	0
ENSDARG00000100573			0	0	0	0.416667	0	12	12	false	1043.58	0	0	false	0	ENSDARG00000100573	0
ENSDARG00000100544			0	0	0	0.45	0	5	5	false	1330	0	0	false	0	ENSDARG00000100544	0
ENSDARG00000099514			0	0	0	0.363636	0	12	12	false	939.667	0	0	false	0	ENSDARG00000099514	0
ENSDARG00000099375			0	0	0	0.47619	0	7	7	false	1365.29	0	0	false	0	ENSDARG00000099375	0
ENSDARG00000098666			0	0	0	0.388889	0	10	10	false	1234.2	0	0	false	0	ENSDARG00000098666	0
ENSDARG00000094734			0	0	0	0.4	0	10	10	false	1139.8	0	0	false	0	ENSDARG00000094734	0
ENSDARG00000094427			0	0	0	0.45	0	5	5	false	1312.8	0	0	false	0	ENSDARG00000094427	0
ENSDARG00000093562			0	0	0	0.47619	0	7	7	false	1328	0	0	false	0	ENSDARG00000093562	0
ENSDARG00000091896			0	0	0	0.428571	0	7	7	false	1210.71	0	0	false	0	ENSDARG00000091896	0
ENSDARG00000087536			0	0	0	0.4	0	5	5	false	1341.6	0	0	false	0	ENSDARG00000087536	0
ENSDARG00000087390			0	0	0	0.433333	0	6	6	false	1190.33	0	0	false	0	ENSDARG00000087390	0
ENSDARG00000079241			0	0	0	0.5	0	2	2	false	1381.5	0	0	false	0	ENSDARG00000079241	0
ENSDARG00000079064			0	0	0	0.466667	0	10	10	false	1098.3	0	0	false	0	ENSDARG00000079064	0
ENSDARG00000077442			0	0	0	0.477778	0	10	10	false	1354.3	0	0	false	0	ENSDARG00000077442	0
ENSDARG00000075664			0	0	0	0.5	0	5	5	false	1130.8	0	0	false	0	ENSDARG00000075664	0
ENSDARG00000074337			0	0	0	0.404762	0	7	7	false	1281.57	0	0	false	0	ENSDARG00000074337	0
ENSDARG00000074314			0	0	0	0.5	0	2	2	false	1381.5	0	0	false	0	ENSDARG00000074314	0
ENSDARG00000070656			0	0	0	0.456044	0	14	14	false	1092.29	0	0	false	0	ENSDARG00000070656	0
ENSDARG00000070498			0	0	0	0.433333	0	15	15	false	1141.2	0	0	false	0	ENSDARG00000070498	0
ENSDARG00000069185			0	0	0	0.455556	0	10	10	false	1209.5	0	0	false	0	ENSDARG00000069185	0
ENSDARG00000063194			0	0	0	0.458333	0	9	9	false	1312.78	0	0	false	0	ENSDARG00000063194	0
ENSDARG00000061159			0	0	0	0.426471	0	17	17	false	1235.47	0	0	false	0	ENSDARG00000061159	0
ENSDARG00000060007			0	0	0	0.472727	0	11	11	false	1317.82	0	0	false	0	ENSDARG00000060007	0
ENSDARG00000056029			0	0	0	0.458333	0	16	16	false	1304.62	0	0	false	0	ENSDARG00000056029	0
ENSDARG00000045305			0	0	0	0.467949	0	13	13	false	1284.15	0	0	false	0	ENSDARG00000045305	0
ENSDARG00000044925			0	0	0	0.45	0	5	5	false	1276	0	0	false	0	ENSDARG00000044925	0
ENSDARG00000044135			0	0	0	0.452381	0	7	7	false	1302	0	0	false	0	ENSDARG00000044135	0
ENSDARG00000041982			0	0	0	0.333333	0	3	3	false	1266.33	0	0	false	0	ENSDARG00000041982	0
ENSDARG00000040224			0	0	0	0.409091	0	11	11	false	1183.91	0	0	false	0	ENSDARG00000040224	0
ENSDARG00000039547			0	0	0	0.333333	0	3	3	false	1266.33	0	0	false	0	ENSDARG00000039547	0
ENSDARG00000039354			0	0	0	0.466667	0	6	6	false	1341.33	0	0	false	0	ENSDARG00000039354	0
ENSDARG00000037283			0	0	0	0.416667	0	12	12	false	1201.75	0	0	false	0	ENSDARG00000037283	0
ENSDARG00000034256			0	0	0	0.44697	0	12	12	false	1347.92	0	0	false	0	ENSDARG00000034256	0
ENSDARG00000033967			0	0	0	0.444444	0	10	10	false	1286.4	0	0	false	0	ENSDARG00000033967	0
ENSDARG00000033957			0	0	0	0.466667	0	10	10	false	1350.1	0	0	false	0	ENSDARG00000033957	0
ENSDARG00000022718			0	0	0	0.395238	0	15	15	false	1276.47	0	0	false	0	ENSDARG00000022718	0
ENSDARG00000020086			0	0	0	0.427273	0	11	11	false	1301	0	0	false	0	ENSDARG00000020086	0
ENSDARG00000105046			0	0	0	0.429487	0	13	13	false	1105.54	0	0	false	0	ENSDARG00000105046	0
ENSDARG00000104904			0	0	0	0.422222	0	10	10	false	1275.2	0	0	false	0	ENSDARG00000104904	0
ENSDARG00000104870			0	0	0	0.388889	0	9	9	false	1302.67	0	0	false	0	ENSDARG00000104870	0
ENSDARG00000104831			0	0	0	0	0	1	1	false	921	0	0	false	0	ENSDARG00000104831	0
ENSDARG00000104495			0	0	0	0.431373	0	18	18	false	1278.94	0	0	false	0	ENSDARG00000104495	0
ENSDARG00000103337			0	0	0	0.5	0	4	4	false	917.25	0	0	false	0	ENSDARG00000103337	0
ENSDARG00000102674			0	0	0	0.448718	0	13	13	false	1109.54	0	0	false	0	ENSDARG00000102674	0
ENSDARG00000102546			0	0	0	0.458333	0	9	9	false	1303.11	0	0	false	0	ENSDARG00000102546	0
ENSDARG00000101645			0	0	0	0.438095	0	15	15	false	1137.93	0	0	false	0	ENSDARG00000101645	0
ENSDARG00000100783			0	0	0	0.2	0	5	5	false	583.8	0	0	false	0	ENSDARG00000100783	0
ENSDARG00000099635			0	0	0	0.409357	0	19	19	false	1148.32	0	0	false	0	ENSDARG00000099635	0
ENSDARG00000098650			0	0	0	0.446429	0	8	8	false	1265.12	0	0	false	0	ENSDARG00000098650	0
ENSDARG00000097765			0	0	0	0.363636	0	12	12	false	1262.08	0	0	false	0	ENSDARG00000097765	0
ENSDARG00000097025			0	0	0	0.5	0	6	6	false	1272	0	0	false	0	ENSDARG00000097025	0
ENSDARG00000092806			0	0	0	0.5	0	5	5	false	1293.4	0	0	false	0	ENSDARG00000092806	0
ENSDARG00000092445			0	0	0	0.412088	0	14	14	false	1116.14	0	0	false	0	ENSDARG00000092445	0
ENSDARG00000092360			0	0	0	0.466667	0	6	6	false	1167	0	0	false	0	ENSDARG00000092360	0
ENSDARG00000090120			0	0	0	0.446429	0	8	8	false	1272.25	0	0	false	0	ENSDARG00000090120	0
ENSDARG00000087556			0	0	0	0.416667	0	12	12	false	1090.17	0	0	false	0	ENSDARG00000087556	0
ENSDARG00000086425			0	0	0	0.404762	0	7	7	false	1237.14	0	0	false	0	ENSDARG00000086425	0
ENSDARG00000079036			0	0	0	0.357143	0	7	7	false	1091	0	0	false	0	ENSDARG00000079036	0
ENSDARG00000078578			0	0	0	0.445055	0	14	14	false	1315.86	0	0	false	0	ENSDARG00000078578	0
ENSDARG00000078166			0	0	0	0.433333	0	6	6	false	1261.83	0	0	false	0	ENSDARG00000078166	0
ENSDARG00000077911			0	0	0	0.422222	0	10	10	false	1311.2	0	0	false	0	ENSDARG00000077911	0
ENSDARG00000076766			0	0	0	0.431818	0	12	12	false	1071.58	0	0	false	0	ENSDARG00000076766	0
ENSDARG00000070282			0	0	0	0.2	0	6	6	false	659.167	0	0	false	0	ENSDARG00000070282	0
ENSDARG00000062770			0	0	0	0.466667	0	10	10	false	1321.6	0	0	false	0	ENSDARG00000062770	0
ENSDARG00000061551			0	0	0	0.416667	0	16	16	false	1064.81	0	0	false	0	ENSDARG00000061551	0
ENSDARG00000060946			0	0	0	0.389706	0	17	17	false	1143.76	0	0	false	0	ENSDARG00000060946	0
ENSDARG00000060559			0	0	0	0.411111	0	10	10	false	1130.1	0	0	false	0	ENSDARG00000060559	0
ENSDARG00000057105			0	0	0	0.457143	0	15	15	false	1301.53	0	0	false	0	ENSDARG00000057105	0
ENSDARG00000054128			0	0	0	0.333333	0	3	3	false	1228	0	0	false	0	ENSDARG00000054128	0
ENSDARG00000051736			0	0	0	0.482143	0	8	8	false	1122.75	0	0	false	0	ENSDARG00000051736	0
ENSDARG00000045605			0	0	0	0.4625	0	16	16	false	1239.56	0	0	false	0	ENSDARG00000045605	0
ENSDARG00000044002			0	0	0	0.420833	0	16	16	false	1203.56	0	0	false	0	ENSDARG00000044002	0
ENSDARG00000042489			0	0	0	0.445455	0	11	11	false	1196.73	0	0	false	0	ENSDARG00000042489	0
ENSDARG00000040727			0	0	0	0.404167	0	16	16	false	1246.94	0	0	false	0	ENSDARG00000040727	0
ENSDARG00000039020	-3.73865	-0.734841	0	0	0	0.435897	0	13	13	false	1147.46	0	0	false	0	ENSDARG00000039020	0	fbxo5
ENSDARG00000035770			0	0	0	0.368421	0	19	19	false	1013.68	0	0	false	0	ENSDARG00000035770	0
ENSDARG00000023584			0	0	0	0.4	0	10	10	false	1187.6	0	0	false	0	ENSDARG00000023584	0
ENSDARG00000022727			0	0	0	0.383333	0	16	16	false	1049.62	0	0	false	0	ENSDARG00000022727	0
ENSDARG00000019706			0	0	0	0.467033	0	14	14	false	1303.86	0	0	false	0	ENSDARG00000019706	0
ENSDARG00000019529			0	0	0	0.333333	0	3	3	false	896	0	0	false	0	ENSDARG00000019529	0
ENSDARG00000014480			0	0	0	0.433333	0	6	6	false	1256.17	0	0	false	0	ENSDARG00000014480	0
ENSDARG00000013153			0	0	0	0.4	0	5	5	false	1221.8	0	0	false	0	ENSDARG00000013153	0
ENSDARG00000013122			0	0	0	0.47619	0	7	7	false	1285.29	0	0	false	0	ENSDARG00000013122	0
ENSDARG00000012005	-2.22096	-0.75383	0	0	0	0.389493	0	24	24	false	1094.58	0	0	false	0	ENSDARG00000012005	0	mob2b
ENSDARG00000009387			0	0	0	0.5	0	5	5	false	1293.4	0	0	false	0	ENSDARG00000009387	0
ENSDARG00000007769			0	0	0	0.355556	0	10	10	false	1129.8	0	0	false	0	ENSDARG00000007769	0
ENSDARG00000102651			0	0	0	0.378676	0	17	17	false	1177.59	0	0	false	0	ENSDARG00000102651	0
ENSDARG00000102053			0	0	0	0.291667	0	9	9	false	1185.33	0	0	false	0	ENSDARG00000102053	0
ENSDARG00000099981			0	0	0	0.15	0	5	5	false	1104.4	0	0	false	0	ENSDARG00000099981	0
ENSDARG00000095332			0	0	0	0.391667	0	16	16	false	1167.88	0	0	false	0	ENSDARG00000095332	0
ENSDARG00000092776			0	0	0	0.371212	0	12	12	false	1103.33	0	0	false	0	ENSDARG00000092776	0
ENSDARG00000092246			0	0	0	0.285714	0	7	7	false	1138.71	0	0	false	0	ENSDARG00000092246	0
ENSDARG00000091131			0	0	0	0.393116	0	24	24	false	1136.04	0	0	false	0	ENSDARG00000091131	0
ENSDARG00000089444			0	0	0	0.357143	0	8	8	false	1118.38	0	0	false	0	ENSDARG00000089444	0
ENSDARG00000075747			0	0	0	0.372727	0	11	11	false	1164.91	0	0	false	0	ENSDARG00000075747	0
ENSDARG00000075470			0	0	0	0.327273	0	11	11	false	1151.27	0	0	false	0	ENSDARG00000075470	0
ENSDARG00000074796			0	0	0	0.385714	0	15	15	false	1040.8	0	0	false	0	ENSDARG00000074796	0
ENSDARG00000074675			0	0	0	0.311111	0	10	10	false	1118.1	0	0	false	0	ENSDARG00000074675	0
ENSDARG00000073799			0	0	0	0.375	0	9	9	false	1139.56	0	0	false	0	ENSDARG00000073799	0
ENSDARG00000070568			0	0	0	0.378676	0	17	17	false	1203.76	0	0	false	0	ENSDARG00000070568	0
ENSDARG00000070239			0	0	0	0.363636	0	12	12	false	1101.33	0	0	false	0	ENSDARG00000070239	0
ENSDARG00000061660			0	0	0	0.401099	0	14	14	false	1073.64	0	0	false	0	ENSDARG00000061660	0
ENSDARG00000058710			0	0	0	0.392157	0	18	18	false	1198.61	0	0	false	0	ENSDARG00000058710	0
ENSDARG00000057986			0	0	0	0.344444	0	10	10	false	1147.7	0	0	false	0	ENSDARG00000057986	0
ENSDARG00000053800			0	0	0	0.281818	0	11	11	false	1129.73	0	0	false	0	ENSDARG00000053800	0
ENSDARG00000041910			0	0	0	0.3	0	6	6	false	1021.5	0	0	false	0	ENSDARG00000041910	0
ENSDARG00000039263			0	0	0	0.346154	0	14	14	false	1178.43	0	0	false	0	ENSDARG00000039263	0
ENSDARG00000024642			0	0	0	0.366667	0	15	15	false	1161	0	0	false	0	ENSDARG00000024642	0
ENSDARG00000024471			0	0	0	0.348485	0	12	12	false	1144.58	0	0	false	0	ENSDARG00000024471	0
ENSDARG00000015239			0	0	0	0.366667	0	10	10	false	1209.4	0	0	false	0	ENSDARG00000015239	0
ENSDARG00000010918			0	0	0	0.319444	0	9	9	false	1160.89	0	0	false	0	ENSDARG00000010918	0
ENSDARG00000009837			0	0	0	0.339286	0	8	8	false	1033.5	0	0	false	0	ENSDARG00000009837	0
ENSDARG00000007278			0	0	0	0.404762	0	15	15	false	1240.8	0	0	false	0	ENSDARG00000007278	0
ENSDARG00000105418			0	0	0	0.375	0	8	8	false	1262	0	0	false	0	ENSDARG00000105418	0
ENSDARG00000105359			0	0	0	0.433333	0	15	15	false	1162.8	0	0	false	0	ENSDARG00000105359	0
ENSDARG00000104715			0	0	0	0.133333	0	6	6	false	982.833	0	0	false	0	ENSDARG00000104715	0
ENSDARG00000103684			0	0	0	0.404412	0	17	17	false	1224.29	0	0	false	0	ENSDARG00000103684	0
ENSDARG00000103251			0	0	0	0.397368	0	20	20	false	1211.7	0	0	false	0	ENSDARG00000103251	0
ENSDARG00000102274			0	0	0	0.3875	0	16	16	false	1080.69	0	0	false	0	ENSDARG00000102274	0
ENSDARG00000101278			0	0	0	0.357143	0	7	7	false	1251.86	0	0	false	0	ENSDARG00000101278	0
ENSDARG00000100741			0	0	0	0.392157	0	18	18	false	1163.78	0	0	false	0	ENSDARG00000100741	0
ENSDARG00000100508			0	0	0	0.35	0	16	16	false	978.812	0	0	false	0	ENSDARG00000100508	0
ENSDARG00000099149			0	0	0	0.411765	0	18	18	false	1226.5	0	0	false	0	ENSDARG00000099149	0
ENSDARG00000099021			0	0	0	0.434066	0	14	14	false	1211.86	0	0	false	0	ENSDARG00000099021	0
ENSDARG00000096919			0	0	0	0.416667	0	4	4	false	1127.75	0	0	false	0	ENSDARG00000096919	0
ENSDARG00000078442			0	0	0	0.333333	0	3	3	false	1072.33	0	0	false	0	ENSDARG00000078442	0
ENSDARG00000075379			0	0	0	0.383041	0	19	19	false	1097.05	0	0	false	0	ENSDARG00000075379	0
ENSDARG00000069240			0	0	0	0.391667	0	16	16	false	1135.31	0	0	false	0	ENSDARG00000069240	0
ENSDARG00000060596			0	0	0	0.357143	0	8	8	false	1270.12	0	0	false	0	ENSDARG00000060596	0
ENSDARG00000051798			0	0	0	0.407115	0	23	23	false	1142.74	0	0	false	0	ENSDARG00000051798	0
ENSDARG00000051770			0	0	0	0.397436	0	13	13	false	1245.08	0	0	false	0	ENSDARG00000051770	0
ENSDARG00000042094			0	0	0	0.25	0	9	9	false	995	0	0	false	0	ENSDARG00000042094	0
ENSDARG00000037260			0	0	0	0.316176	0	17	17	false	1139.53	0	0	false	0	ENSDARG00000037260	0
ENSDARG00000036064			0	0	0	0.433333	0	10	10	false	1259.9	0	0	false	0	ENSDARG00000036064	0
ENSDARG00000027586			0	0	0	0.379121	0	14	14	false	1206.86	0	0	false	0	ENSDARG00000027586	0
ENSDARG00000026178			0	0	0	0.418182	0	11	11	false	1197.82	0	0	false	0	ENSDARG00000026178	0
ENSDARG00000015990			0	0	0	0.361905	0	15	15	false	1169.2	0	0	false	0	ENSDARG00000015990	0
ENSDARG00000012295			0	0	0	0.35	0	5	5	false	1169.8	0	0	false	0	ENSDARG00000012295	0
ENSDARG00000007221			0	0	0	0.458333	0	9	9	false	1365.33	0	0	false	0	ENSDARG00000007221	0
ENSDARG00000105393			0	0	0	0.363971	0	17	17	false	964.588	0	0	false	0	ENSDARG00000105393	0
ENSDARG00000105340			0	0	0	0.444444	0	19	19	false	1312.11	0	0	false	0	ENSDARG00000105340	0
ENSDARG00000104790			0	0	0	0.452381	0	15	15	false	1177.33	0	0	false	0	ENSDARG00000104790	0
ENSDARG00000103135			0	0	0	0.409357	0	19	19	false	1195.79	0	0	false	0	ENSDARG00000103135	0
ENSDARG00000102855			0	0	0	0.436364	0	11	11	false	1279.18	0	0	false	0	ENSDARG00000102855	0
ENSDARG00000102694			0	0	0	0.433333	0	6	6	false	1334.17	0	0	false	0	ENSDARG00000102694	0
ENSDARG00000102265			0	0	0	0.383399	0	23	23	false	1124.52	0	0	false	0	ENSDARG00000102265	0
ENSDARG00000102091			0	0	0	0.47619	0	7	7	false	1267.86	0	0	false	0	ENSDARG00000102091	0
ENSDARG00000101947			0	0	0	0.406926	0	22	22	false	1165.64	0	0	false	0	ENSDARG00000101947	0
ENSDARG00000101534			0	0	0	0.482143	0	8	8	false	1342.12	0	0	false	0	ENSDARG00000101534	0
ENSDARG00000101404			0	0	0	0.444444	0	9	9	false	1341.89	0	0	false	0	ENSDARG00000101404	0
ENSDARG00000101291			0	0	0	0.407609	0	24	24	false	1154.17	0	0	false	0	ENSDARG00000101291	0
ENSDARG00000101206			0	0	0	0.433333	0	16	16	false	1290.94	0	0	false	0	ENSDARG00000101206	0
ENSDARG00000101203			0	0	0	0.37619	0	21	21	false	1204.48	0	0	false	0	ENSDARG00000101203	0
ENSDARG00000100636			0	0	0	0.457143	0	15	15	false	1343	0	0	false	0	ENSDARG00000100636	0
ENSDARG00000100315			0	0	0	0.466667	0	10	10	false	1190.7	0	0	false	0	ENSDARG00000100315	0
ENSDARG00000100290			0	0	0	0.401961	0	18	18	false	1117.56	0	0	false	0	ENSDARG00000100290	0
ENSDARG00000100264			0	0	0	0.373333	0	25	25	false	1058.12	0	0	false	0	ENSDARG00000100264	0
ENSDARG00000100019			0	0	0	0.5	0	6	6	false	1368.33	0	0	false	0	ENSDARG00000100019	0
ENSDARG00000099966			0	0	0	0.455882	0	17	17	false	1166.53	0	0	false	0	ENSDARG00000099966	0
ENSDARG00000099640			0	0	0	0.390476	0	21	21	false	1108.81	0	0	false	0	ENSDARG00000099640	0
ENSDARG00000099569			0	0	0	0.397059	0	17	17	false	1243.12	0	0	false	0	ENSDARG00000099569	0
ENSDARG00000099541			0	0	0	0.5	0	6	6	false	1365	0	0	false	0	ENSDARG00000099541	0
ENSDARG00000099478			0	0	0	0.40942	0	24	24	false	1228.17	0	0	false	0	ENSDARG00000099478	0
ENSDARG00000099207			0	0	0	0.457143	0	15	15	false	1312.8	0	0	false	0	ENSDARG00000099207	0
ENSDARG00000099123			0	0	0	0.418182	0	11	11	false	1156.45	0	0	false	0	ENSDARG00000099123	0
ENSDARG00000098970	-2.19803	-1.12146	0	0	0	0.431373	0	18	18	false	1219.22	0	0	false	0	ENSDARG00000098970	0	CU459186.1
ENSDARG00000098871			0	0	0	0.403333	0	25	25	false	1120.88	0	0	false	0	ENSDARG00000098871	0
ENSDARG00000098679			0	0	0	0.5	0	7	7	false	1348.29	0	0	false	0	ENSDARG00000098679	0
ENSDARG00000098574			0	0	0	0.401961	0	18	18	false	1113.89	0	0	false	0	ENSDARG00000098574	0
ENSDARG00000098294			0	0	0	0.381818	0	11	11	false	1047.36	0	0	false	0	ENSDARG00000098294	0
ENSDARG00000098130			0	0	0	0.466667	0	15	15	false	1243	0	0	false	0	ENSDARG00000098130	0
ENSDARG00000097339			0	0	0	0.5	0	10	10	false	1261.1	0	0	false	0	ENSDARG00000097339	0
ENSDARG00000096894			0	0	0	0.390476	0	21	21	false	1228.81	0	0	false	0	ENSDARG00000096894	0
ENSDARG00000096546			0	0	0	0.5	0	3	3	false	1314.33	0	0	false	0	ENSDARG00000096546	0
ENSDARG00000095412	-5.20278	-2.92217	0	0	0	0.415033	0	18	18	false	1259.78	0	0	false	0	ENSDARG00000095412	0	CR847543.2
ENSDARG00000095125			0	0	0	0.454248	0	18	18	false	1276.39	0	0	false	0	ENSDARG00000095125	0
ENSDARG00000093773			0	0	0	0.42381	0	15	15	false	1192.4	0	0	false	0	ENSDARG00000093773	0
ENSDARG00000093422			0	0	0	0.416667	0	9	9	false	1123.78	0	0	false	0	ENSDARG00000093422	0
ENSDARG00000091652			0	0	0	0.391738	0	27	27	false	1143.74	0	0	false	0	ENSDARG00000091652	0
ENSDARG00000091574			0	0	0	0.474359	0	13	13	false	1261.69	0	0	false	0	ENSDARG00000091574	0
ENSDARG00000091521			0	0	0	0.477778	0	10	10	false	1127.5	0	0	false	0	ENSDARG00000091521	0
ENSDARG00000091367			0	0	0	0.37013	0	22	22	false	1201.86	0	0	false	0	ENSDARG00000091367	0
ENSDARG00000091321			0	0	0	0.486111	0	9	9	false	1238.11	0	0	false	0	ENSDARG00000091321	0
ENSDARG00000091209			0	0	0	0.442105	0	20	20	false	1233.5	0	0	false	0	ENSDARG00000091209	0
ENSDARG00000091205	-2.25091	-1.4541	0	0	0	0.439474	0	20	20	false	1292.55	0	0	false	0	ENSDARG00000091205	0	h2a
ENSDARG00000091101			0	0	0	0.490909	0	11	11	false	1318.09	0	0	false	0	ENSDARG00000091101	0
ENSDARG00000091061			0	0	0	0.440476	0	21	21	false	1137.57	0	0	false	0	ENSDARG00000091061	0
ENSDARG00000090689			0	0	0	0.214286	0	8	8	false	1051.88	0	0	false	0	ENSDARG00000090689	0
ENSDARG00000090447			0	0	0	0.458333	0	9	9	false	1317.56	0	0	false	0	ENSDARG00000090447	0
ENSDARG00000090149			0	0	0	0.5	0	10	10	false	1278.5	0	0	false	0	ENSDARG00000090149	0
ENSDARG00000090054			0	0	0	0.402778	0	9	9	false	1198.78	0	0	false	0	ENSDARG00000090054	0
ENSDARG00000089908			0	0	0	0.4	0	21	21	false	1252.57	0	0	false	0	ENSDARG00000089908	0
ENSDARG00000089861			0	0	0	0.463203	0	22	22	false	1178.32	0	0	false	0	ENSDARG00000089861	0
ENSDARG00000089604			0	0	0	0.428571	0	15	15	false	1284.87	0	0	false	0	ENSDARG00000089604	0
ENSDARG00000089475			0	0	0	0.411111	0	10	10	false	1240.5	0	0	false	0	ENSDARG00000089475	0
ENSDARG00000089361			0	0	0	0.457895	0	20	20	false	1198.35	0	0	false	0	ENSDARG00000089361	0
ENSDARG00000089159			0	0	0	0.428571	0	7	7	false	1275.14	0	0	false	0	ENSDARG00000089159	0
ENSDARG00000087752			0	0	0	0.336257	0	19	19	false	1155.37	0	0	false	0	ENSDARG00000087752	0
ENSDARG00000087704			0	0	0	0.450549	0	14	14	false	1219.57	0	0	false	0	ENSDARG00000087704	0
ENSDARG00000087457			0	0	0	0.428105	0	18	18	false	1121.17	0	0	false	0	ENSDARG00000087457	0
ENSDARG00000084995			0	0	0	0.466667	0	6	6	false	1271.17	0	0	false	0	ENSDARG00000084995	0
ENSDARG00000081450			0	0	0	0.418301	0	18	18	false	1264.39	0	0	false	0	ENSDARG00000081450	0
ENSDARG00000079684			0	0	0	0.447619	0	21	21	false	1236.19	0	0	false	0	ENSDARG00000079684	0
ENSDARG00000079549			0	0	0	0.426471	0	17	17	false	1127.29	0	0	false	0	ENSDARG00000079549	0
ENSDARG00000079457			0	0	0	0.5	0	4	4	false	1108.75	0	0	false	0	ENSDARG00000079457	0
ENSDARG00000079438			0	0	0	0.422925	0	23	23	false	1139.74	0	0	false	0	ENSDARG00000079438	0
ENSDARG00000079238			0	0	0	0.455263	0	20	20	false	1264.55	0	0	false	0	ENSDARG00000079238	0
ENSDARG00000079236			0	0	0	0.428947	0	20	20	false	1299.95	0	0	false	0	ENSDARG00000079236	0
ENSDARG00000078004			0	0	0	0.5	0	8	8	false	1354.5	0	0	false	0	ENSDARG00000078004	0
ENSDARG00000077532			0	0	0	0.386029	0	17	17	false	1126.24	0	0	false	0	ENSDARG00000077532	0
ENSDARG00000077456			0	0	0	0.45	0	16	16	false	1277.44	0	0	false	0	ENSDARG00000077456	0
ENSDARG00000077098			0	0	0	0.456044	0	14	14	false	1300.36	0	0	false	0	ENSDARG00000077098	0
ENSDARG00000076614			0	0	0	0.5	0	6	6	false	1295.33	0	0	false	0	ENSDARG00000076614	0
ENSDARG00000075482			0	0	0	0.402597	0	22	22	false	1090.64	0	0	false	0	ENSDARG00000075482	0
ENSDARG00000074979			0	0	0	0.420833	0	16	16	false	1104.31	0	0	false	0	ENSDARG00000074979	0
ENSDARG00000074933			0	0	0	0.5	0	5	5	false	1245.4	0	0	false	0	ENSDARG00000074933	0
ENSDARG00000074453			0	0	0	0.378333	0	25	25	false	1105.8	0	0	false	0	ENSDARG00000074453	0
ENSDARG00000074332			0	0	0	0.45	0	20	20	false	1307.5	0	0	false	0	ENSDARG00000074332	0
ENSDARG00000074326			0	0	0	0.393116	0	24	24	false	1199.58	0	0	false	0	ENSDARG00000074326	0
ENSDARG00000074161			0	0	0	0.441176	0	18	18	false	1234.61	0	0	false	0	ENSDARG00000074161	0
ENSDARG00000070286			0	0	0	0.448718	0	13	13	false	1270.77	0	0	false	0	ENSDARG00000070286	0
ENSDARG00000070278			0	0	0	0.434066	0	14	14	false	1266.29	0	0	false	0	ENSDARG00000070278	0
ENSDARG00000069242			0	0	0	0.382353	0	17	17	false	1210.47	0	0	false	0	ENSDARG00000069242	0
ENSDARG00000068650			0	0	0	0.333333	0	12	12	false	1164.58	0	0	false	0	ENSDARG00000068650	0
ENSDARG00000068572			0	0	0	0.452381	0	15	15	false	1316	0	0	false	0	ENSDARG00000068572	0
ENSDARG00000063730			0	0	0	0.5	0	4	4	false	1335.25	0	0	false	0	ENSDARG00000063730	0
ENSDARG00000063701	-1.64717	-1.18997	0	0	0	0.388095	0	21	21	false	1211.38	0	0	false	0	ENSDARG00000063701	0	rreb1a
ENSDARG00000062402			0	0	0	0.433333	0	6	6	false	1357.33	0	0	false	0	ENSDARG00000062402	0
ENSDARG00000062089			0	0	0	0.454545	0	12	12	false	1339.67	0	0	false	0	ENSDARG00000062089	0
ENSDARG00000061963			0	0	0	0.397233	0	23	23	false	1122.13	0	0	false	0	ENSDARG00000061963	0
ENSDARG00000061844			0	0	0	0.408088	0	17	17	false	1281.47	0	0	false	0	ENSDARG00000061844	0
ENSDARG00000061798			0	0	0	0.5	0	3	3	false	1314.33	0	0	false	0	ENSDARG00000061798	0
ENSDARG00000061490			0	0	0	0.416667	0	12	12	false	1103.17	0	0	false	0	ENSDARG00000061490	0
ENSDARG00000061414			0	0	0	0.426316	0	20	20	false	1286.8	0	0	false	0	ENSDARG00000061414	0
ENSDARG00000061268			0	0	0	0.431818	0	12	12	false	1310.33	0	0	false	0	ENSDARG00000061268	0
ENSDARG00000061260			0	0	0	0.393281	0	23	23	false	1169.13	0	0	false	0	ENSDARG00000061260	0
ENSDARG00000061204			0	0	0	0.423977	0	19	19	false	1267.89	0	0	false	0	ENSDARG00000061204	0
ENSDARG00000061174			0	0	0	0.4	0	6	6	false	1305	0	0	false	0	ENSDARG00000061174	0
ENSDARG00000060983			0	0	0	0.418301	0	18	18	false	1269.89	0	0	false	0	ENSDARG00000060983	0
ENSDARG00000060320			0	0	0	0.44	0	25	25	false	1154.92	0	0	false	0	ENSDARG00000060320	0
ENSDARG00000059322			0	0	0	0.434211	0	20	20	false	1285.1	0	0	false	0	ENSDARG00000059322	0
ENSDARG00000058480			0	0	0	0.433333	0	15	15	false	1290.4	0	0	false	0	ENSDARG00000058480	0
ENSDARG00000058292			0	0	0	0.394737	0	20	20	false	1141.35	0	0	false	0	ENSDARG00000058292	0
ENSDARG00000058089			0	0	0	0.415441	0	17	17	false	1186.94	0	0	false	0	ENSDARG00000058089	0
ENSDARG00000057987			0	0	0	0.5	0	7	7	false	1347.14	0	0	false	0	ENSDARG00000057987	0
ENSDARG00000057826			0	0	0	0.381773	0	29	29	false	1054.72	0	0	false	0	ENSDARG00000057826	0
ENSDARG00000057691			0	0	0	0.419118	0	17	17	false	1293.41	0	0	false	0	ENSDARG00000057691	0
ENSDARG00000057484	-1.25611	-0.852953	0	0	0	0.387692	0	26	26	false	1124.08	0	0	false	0	ENSDARG00000057484	0	srsf2a
ENSDARG00000057234			0	0	0	0.441176	0	18	18	false	1223.78	0	0	false	0	ENSDARG00000057234	0
ENSDARG00000057099			0	0	0	0.428571	0	14	14	false	1282.71	0	0	false	0	ENSDARG00000057099	0
ENSDARG00000057062			0	0	0	0.441176	0	18	18	false	1287.5	0	0	false	0	ENSDARG00000057062	0
ENSDARG00000056913			0	0	0	0.365385	0	13	13	false	1120.62	0	0	false	0	ENSDARG00000056913	0
ENSDARG00000056886			0	0	0	0.440476	0	21	21	false	1237.43	0	0	false	0	ENSDARG00000056886	0
ENSDARG00000056741			0	0	0	0.428571	0	7	7	false	1343.29	0	0	false	0	ENSDARG00000056741	0
ENSDARG00000056525			0	0	0	0.464286	0	8	8	false	1345.38	0	0	false	0	ENSDARG00000056525	0
ENSDARG00000055357			0	0	0	0.4	0	11	11	false	1180	0	0	false	0	ENSDARG00000055357	0
ENSDARG00000055086			0	0	0	0.436364	0	11	11	false	1031.73	0	0	false	0	ENSDARG00000055086	0
ENSDARG00000053702			0	0	0	0.428947	0	20	20	false	1266.2	0	0	false	0	ENSDARG00000053702	0
ENSDARG00000051754			0	0	0	0.404167	0	16	16	false	1245.88	0	0	false	0	ENSDARG00000051754	0
ENSDARG00000051735			0	0	0	0.423077	0	13	13	false	1277.69	0	0	false	0	ENSDARG00000051735	0
ENSDARG00000045748			0	0	0	0.409524	0	15	15	false	1280.2	0	0	false	0	ENSDARG00000045748	0
ENSDARG00000045142			0	0	0	0.441176	0	17	17	false	1162.76	0	0	false	0	ENSDARG00000045142	0
ENSDARG00000044874			0	0	0	0.452381	0	7	7	false	1247.57	0	0	false	0	ENSDARG00000044874	0
ENSDARG00000044820			0	0	0	0.412281	0	19	19	false	1242.53	0	0	false	0	ENSDARG00000044820	0
ENSDARG00000044492			0	0	0	0.408333	0	16	16	false	1253.31	0	0	false	0	ENSDARG00000044492	0
ENSDARG00000044304			0	0	0	0.463636	0	11	11	false	1371.73	0	0	false	0	ENSDARG00000044304	0
ENSDARG00000044191			0	0	0	0.458333	0	9	9	false	1231.67	0	0	false	0	ENSDARG00000044191	0
ENSDARG00000043973			0	0	0	0.433333	0	10	10	false	1329	0	0	false	0	ENSDARG00000043973	0
ENSDARG00000042561			0	0	0	0.366402	0	28	28	false	1116.96	0	0	false	0	ENSDARG00000042561	0
ENSDARG00000042147			0	0	0	0.452381	0	7	7	false	1360.43	0	0	false	0	ENSDARG00000042147	0
ENSDARG00000042116			0	0	0	0.45098	0	18	18	false	1249.5	0	0	false	0	ENSDARG00000042116	0
ENSDARG00000042005			0	0	0	0.455556	0	10	10	false	1346	0	0	false	0	ENSDARG00000042005	0
ENSDARG00000041113			0	0	0	0.406926	0	22	22	false	1140.64	0	0	false	0	ENSDARG00000041113	0
ENSDARG00000040984			0	0	0	0.426901	0	19	19	false	1268.37	0	0	false	0	ENSDARG00000040984	0
ENSDARG00000040338			0	0	0	0.371345	0	19	19	false	1185.32	0	0	false	0	ENSDARG00000040338	0
ENSDARG00000040310			0	0	0	0.4	0	11	11	false	1232.45	0	0	false	0	ENSDARG00000040310	0
ENSDARG00000038802			0	0	0	0.365497	0	19	19	false	1136	0	0	false	0	ENSDARG00000038802	0
ENSDARG00000038139			0	0	0	0.447368	0	19	19	false	1258.47	0	0	false	0	ENSDARG00000038139	0
ENSDARG00000037965			0	0	0	0.267857	0	8	8	false	1161.75	0	0	false	0	ENSDARG00000037965	0
ENSDARG00000037928			0	0	0	0.426471	0	17	17	false	1297.65	0	0	false	0	ENSDARG00000037928	0
ENSDARG00000037362			0	0	0	0.388889	0	9	9	false	1239.67	0	0	false	0	ENSDARG00000037362	0
ENSDARG00000037334			0	0	0	0.45	0	16	16	false	1244.44	0	0	false	0	ENSDARG00000037334	0
ENSDARG00000036500			0	0	0	0.488889	0	10	10	false	1137.4	0	0	false	0	ENSDARG00000036500	0
ENSDARG00000036180			0	0	0	0.462121	0	12	12	false	1236.5	0	0	false	0	ENSDARG00000036180	0
ENSDARG00000035954			0	0	0	0.408088	0	17	17	false	1178.35	0	0	false	0	ENSDARG00000035954	0
ENSDARG00000035608			0	0	0	0.433333	0	16	16	false	1140.5	0	0	false	0	ENSDARG00000035608	0
ENSDARG00000035146			0	0	0	0.484848	0	12	12	false	1204.5	0	0	false	0	ENSDARG00000035146	0
ENSDARG00000034056			0	0	0	0.433333	0	25	25	false	1141.56	0	0	false	0	ENSDARG00000034056	0
ENSDARG00000031976			0	0	0	0.481618	0	17	17	false	1204.35	0	0	false	0	ENSDARG00000031976	0
ENSDARG00000031886			0	0	0	0.392857	0	21	21	false	1124.1	0	0	false	0	ENSDARG00000031886	0
ENSDARG00000031774			0	0	0	0.464286	0	8	8	false	1319.88	0	0	false	0	ENSDARG00000031774	0
ENSDARG00000029768			0	0	0	0.450549	0	14	14	false	1091.79	0	0	false	0	ENSDARG00000029768	0
ENSDARG00000029612			0	0	0	0.447619	0	15	15	false	1226.73	0	0	false	0	ENSDARG00000029612	0
ENSDARG00000029472			0	0	0	0.43956	0	14	14	false	1295	0	0	false	0	ENSDARG00000029472	0
ENSDARG00000029133			0	0	0	0.5	0	7	7	false	1330.43	0	0	false	0	ENSDARG00000029133	0
ENSDARG00000028099			0	0	0	0.463636	0	11	11	false	1279.73	0	0	false	0	ENSDARG00000028099	0
ENSDARG00000027403			0	0	0	0.419048	0	15	15	false	1246	0	0	false	0	ENSDARG00000027403	0
ENSDARG00000024184			0	0	0	0.454167	0	16	16	false	1307	0	0	false	0	ENSDARG00000024184	0
ENSDARG00000020252			0	0	0	0.418129	0	19	19	false	1255.47	0	0	false	0	ENSDARG00000020252	0
ENSDARG00000019995			0	0	0	0.428105	0	18	18	false	1237.78	0	0	false	0	ENSDARG00000019995	0
ENSDARG00000019521			0	0	0	0.429167	0	16	16	false	1262.69	0	0	false	0	ENSDARG00000019521	0
ENSDARG00000019265			0	0	0	0.430736	0	22	22	false	1248.59	0	0	false	0	ENSDARG00000019265	0
ENSDARG00000018918			0	0	0	0.403162	0	23	23	false	1080.52	0	0	false	0	ENSDARG00000018918	0
ENSDARG00000018890			0	0	0	0.383333	0	16	16	false	1212.69	0	0	false	0	ENSDARG00000018890	0
ENSDARG00000018263			0	0	0	0.42619	0	21	21	false	1287.38	0	0	false	0	ENSDARG00000018263	0
ENSDARG00000018260			0	0	0	0.433333	0	6	6	false	1263.67	0	0	false	0	ENSDARG00000018260	0
ENSDARG00000017397			0	0	0	0.444737	0	20	20	false	1243.8	0	0	false	0	ENSDARG00000017397	0
ENSDARG00000017321			0	0	0	0.391534	0	28	28	false	1104.93	0	0	false	0	ENSDARG00000017321	0
ENSDARG00000016783			0	0	0	0.375385	0	26	26	false	1162.42	0	0	false	0	ENSDARG00000016783	0
ENSDARG00000016630			0	0	0	0.417749	0	22	22	false	1221.95	0	0	false	0	ENSDARG00000016630	0
ENSDARG00000016311			0	0	0	0.4	0	26	26	false	1149.5	0	0	false	0	ENSDARG00000016311	0
ENSDARG00000015460			0	0	0	0.444444	0	19	19	false	1247.47	0	0	false	0	ENSDARG00000015460	0
ENSDARG00000015427			0	0	0	0.392157	0	18	18	false	1171	0	0	false	0	ENSDARG00000015427	0
ENSDARG00000015208			0	0	0	0.378205	0	13	13	false	1169.31	0	0	false	0	ENSDARG00000015208	0
ENSDARG00000014943			0	0	0	0.418301	0	18	18	false	1208.78	0	0	false	0	ENSDARG00000014943	0
ENSDARG00000014259			0	0	0	0.419913	0	22	22	false	1270.73	0	0	false	0	ENSDARG00000014259	0
ENSDARG00000014161			0	0	0	0.445455	0	11	11	false	1301.64	0	0	false	0	ENSDARG00000014161	0
ENSDARG00000014017			0	0	0	0.438406	0	24	24	false	1209.46	0	0	false	0	ENSDARG00000014017	0
ENSDARG00000013542			0	0	0	0.415789	0	20	20	false	1261.95	0	0	false	0	ENSDARG00000013542	0
ENSDARG00000012505			0	0	0	0.433333	0	21	21	false	1170.76	0	0	false	0	ENSDARG00000012505	0
ENSDARG00000011373			0	0	0	0.390476	0	21	21	false	1090.29	0	0	false	0	ENSDARG00000011373	0
ENSDARG00000011262			0	0	0	0.422222	0	10	10	false	1270.8	0	0	false	0	ENSDARG00000011262	0
ENSDARG00000011027			0	0	0	0.464286	0	8	8	false	1342.88	0	0	false	0	ENSDARG00000011027	0
ENSDARG00000010238			0	0	0	0.442308	0	13	13	false	1341	0	0	false	0	ENSDARG00000010238	0
ENSDARG00000008953			0	0	0	0.403333	0	25	25	false	1171.76	0	0	false	0	ENSDARG00000008953	0
ENSDARG00000008461			0	0	0	0.444444	0	19	19	false	1274.74	0	0	false	0	ENSDARG00000008461	0
ENSDARG00000007485			0	0	0	0.448529	0	17	17	false	1298.53	0	0	false	0	ENSDARG00000007485	0
ENSDARG00000105484			0	0	0	0.388889	0	19	19	false	1138.05	0	0	false	0	ENSDARG00000105484	0
ENSDARG00000105430			0	0	0	0.466667	0	6	6	false	1048.67	0	0	false	0	ENSDARG00000105430	0
ENSDARG00000105403			0	0	0	0.458333	0	9	9	false	1294.33	0	0	false	0	ENSDARG00000105403	0
ENSDARG00000105374			0	0	0	0.383333	0	16	16	false	1163.75	0	0	false	0	ENSDARG00000105374	0
ENSDARG00000105350			0	0	0	0.44697	0	12	12	false	1227	0	0	false	0	ENSDARG00000105350	0
ENSDARG00000105154			0	0	0	0.445833	0	16	16	false	1192.12	0	0	false	0	ENSDARG00000105154	0
ENSDARG00000104175			0	0	0	0.409091	0	11	11	false	1194.55	0	0	false	0	ENSDARG00000104175	0
ENSDARG00000104169			0	0	0	0.378623	0	24	24	false	1080.25	0	0	false	0	ENSDARG00000104169	0
ENSDARG00000103985			0	0	0	0.417582	0	14	14	false	1174.93	0	0	false	0	ENSDARG00000103985	0
ENSDARG00000103979			0	0	0	0.339869	0	18	18	false	989.667	0	0	false	0	ENSDARG00000103979	0
ENSDARG00000103672			0	0	0	0.45471	0	24	24	false	1129.42	0	0	false	0	ENSDARG00000103672	0
ENSDARG00000102087			0	0	0	0.4	0	6	6	false	1081.67	0	0	false	0	ENSDARG00000102087	0
ENSDARG00000101823			0	0	0	0.391667	0	16	16	false	956.438	0	0	false	0	ENSDARG00000101823	0
ENSDARG00000101560			0	0	0	0.400246	0	29	29	false	1086.66	0	0	false	0	ENSDARG00000101560	0
ENSDARG00000100657			0	0	0	0.402151	0	31	31	false	1085.94	0	0	false	0	ENSDARG00000100657	0
ENSDARG00000100503			0	0	0	0.401515	0	12	12	false	935.917	0	0	false	0	ENSDARG00000100503	0
ENSDARG00000100372			0	0	0	0.3375	0	16	16	false	1098.5	0	0	false	0	ENSDARG00000100372	0
ENSDARG00000100209			0	0	0	0.5	0	4	4	false	1192.5	0	0	false	0	ENSDARG00000100209	0
ENSDARG00000100115			0	0	0	0.481818	0	11	11	false	1283	0	0	false	0	ENSDARG00000100115	0
ENSDARG00000099865			0	0	0	0.403986	0	24	24	false	1086.33	0	0	false	0	ENSDARG00000099865	0
ENSDARG00000099767			0	0	0	0.463636	0	11	11	false	1306.64	0	0	false	0	ENSDARG00000099767	0
ENSDARG00000099739			0	0	0	0.5	0	6	6	false	1276.5	0	0	false	0	ENSDARG00000099739	0
ENSDARG00000099612			0	0	0	0.430556	0	9	9	false	1153.67	0	0	false	0	ENSDARG00000099612	0
ENSDARG00000099600			0	0	0	0.414286	0	15	15	false	1127.8	0	0	false	0	ENSDARG00000099600	0
ENSDARG00000098233			0	0	0	0.448718	0	13	13	false	1026.15	0	0	false	0	ENSDARG00000098233	0
ENSDARG00000098124			0	0	0	0.404762	0	7	7	false	1049.86	0	0	false	0	ENSDARG00000098124	0
ENSDARG00000097600			0	0	0	0.398148	0	28	28	false	1124.79	0	0	false	0	ENSDARG00000097600	0
ENSDARG00000097058			0	0	0	0.47619	0	7	7	false	1274	0	0	false	0	ENSDARG00000097058	0
ENSDARG00000096229			0	0	0	0.391667	0	16	16	false	1186.88	0	0	false	0	ENSDARG00000096229	0
ENSDARG00000093078			0	0	0	0.379121	0	14	14	false	1010.5	0	0	false	0	ENSDARG00000093078	0
ENSDARG00000091150			0	0	0	0.428571	0	22	22	false	1130.55	0	0	false	0	ENSDARG00000091150	0
ENSDARG00000086815			0	0	0	0.448529	0	17	17	false	1092.65	0	0	false	0	ENSDARG00000086815	0
ENSDARG00000079756			0	0	0	0.456522	0	23	23	false	1142.35	0	0	false	0	ENSDARG00000079756	0
ENSDARG00000078654			0	0	0	0.455882	0	17	17	false	1191.18	0	0	false	0	ENSDARG00000078654	0
ENSDARG00000077093			0	0	0	0.428571	0	21	21	false	1152.76	0	0	false	0	ENSDARG00000077093	0
ENSDARG00000075143			0	0	0	0.384211	0	20	20	false	1184.45	0	0	false	0	ENSDARG00000075143	0
ENSDARG00000074927			0	0	0	0.38961	0	22	22	false	1210.45	0	0	false	0	ENSDARG00000074927	0
ENSDARG00000074702			0	0	0	0.396739	0	24	24	false	1197.17	0	0	false	0	ENSDARG00000074702	0
ENSDARG00000074565			0	0	0	0.464286	0	8	8	false	1244	0	0	false	0	ENSDARG00000074565	0
ENSDARG00000070798			0	0	0	0.365385	0	13	13	false	1119.92	0	0	false	0	ENSDARG00000070798	0
ENSDARG00000070019			0	0	0	0.409524	0	15	15	false	1102.87	0	0	false	0	ENSDARG00000070019	0
ENSDARG00000069696			0	0	0	0.406433	0	19	19	false	1205.89	0	0	false	0	ENSDARG00000069696	0
ENSDARG00000069326			0	0	0	0.359649	0	19	19	false	1176.84	0	0	false	0	ENSDARG00000069326	0
ENSDARG00000069278			0	0	0	0.482143	0	8	8	false	1245.25	0	0	false	0	ENSDARG00000069278	0
ENSDARG00000069246			0	0	0	0.472222	0	9	9	false	1284.89	0	0	false	0	ENSDARG00000069246	0
ENSDARG00000063182			0	0	0	0.443333	0	25	25	false	1153.12	0	0	false	0	ENSDARG00000063182	0
ENSDARG00000062970			0	0	0	0.421053	0	19	19	false	1110.21	0	0	false	0	ENSDARG00000062970	0
ENSDARG00000062083			0	0	0	0.405263	0	20	20	false	1210.55	0	0	false	0	ENSDARG00000062083	0
ENSDARG00000062030			0	0	0	0.42	0	25	25	false	1122.88	0	0	false	0	ENSDARG00000062030	0
ENSDARG00000061566			0	0	0	0.407609	0	24	24	false	1201.54	0	0	false	0	ENSDARG00000061566	0
ENSDARG00000060308			0	0	0	0.4	0	16	16	false	1215.75	0	0	false	0	ENSDARG00000060308	0
ENSDARG00000060263			0	0	0	0.4375	0	17	17	false	1243.59	0	0	false	0	ENSDARG00000060263	0
ENSDARG00000059961			0	0	0	0.388889	0	18	18	false	1194.06	0	0	false	0	ENSDARG00000059961	0
ENSDARG00000058903			0	0	0	0.461988	0	19	19	false	1142.42	0	0	false	0	ENSDARG00000058903	0
ENSDARG00000058725	-6.63958	-2.06505	0	0	0	0.447368	0	20	20	false	1262.4	0	0	false	0	ENSDARG00000058725	0	rfesd
ENSDARG00000057562			0	0	0	0.352941	0	18	18	false	1088.94	0	0	false	0	ENSDARG00000057562	0
ENSDARG00000056438			0	0	0	0.455882	0	17	17	false	1181.35	0	0	false	0	ENSDARG00000056438	0
ENSDARG00000055443			0	0	0	0.430952	0	21	21	false	1141.57	0	0	false	0	ENSDARG00000055443	0
ENSDARG00000054929			0	0	0	0.428571	0	22	22	false	1186.91	0	0	false	0	ENSDARG00000054929	0
ENSDARG00000052553			0	0	0	0.415789	0	20	20	false	1172.65	0	0	false	0	ENSDARG00000052553	0
ENSDARG00000052094			0	0	0	0.379085	0	18	18	false	948.778	0	0	false	0	ENSDARG00000052094	0
ENSDARG00000051923			0	0	0	0.423077	0	14	14	false	1112.93	0	0	false	0	ENSDARG00000051923	0
ENSDARG00000051785			0	0	0	0.447368	0	19	19	false	1255.37	0	0	false	0	ENSDARG00000051785	0
ENSDARG00000051778			0	0	0	0.419048	0	15	15	false	1063.87	0	0	false	0	ENSDARG00000051778	0
ENSDARG00000044298			0	0	0	0.434641	0	18	18	false	1240.72	0	0	false	0	ENSDARG00000044298	0
ENSDARG00000043986			0	0	0	0.458333	0	16	16	false	1214.56	0	0	false	0	ENSDARG00000043986	0
ENSDARG00000043680			0	0	0	0.423077	0	13	13	false	1245.92	0	0	false	0	ENSDARG00000043680	0
ENSDARG00000042637			0	0	0	0.396739	0	24	24	false	1208.12	0	0	false	0	ENSDARG00000042637	0
ENSDARG00000041723			0	0	0	0.352381	0	15	15	false	1108.6	0	0	false	0	ENSDARG00000041723	0
ENSDARG00000040725			0	0	0	0.397661	0	19	19	false	1036.74	0	0	false	0	ENSDARG00000040725	0
ENSDARG00000039910			0	0	0	0.402778	0	9	9	false	1146.56	0	0	false	0	ENSDARG00000039910	0
ENSDARG00000038695			0	0	0	0.406404	0	29	29	false	1112.1	0	0	false	0	ENSDARG00000038695	0
ENSDARG00000037919			0	0	0	0.442105	0	20	20	false	1191.75	0	0	false	0	ENSDARG00000037919	0
ENSDARG00000037739			0	0	0	0.5	0	3	3	false	1113.33	0	0	false	0	ENSDARG00000037739	0
ENSDARG00000037503			0	0	0	0.455882	0	17	17	false	1210.59	0	0	false	0	ENSDARG00000037503	0
ENSDARG00000037177			0	0	0	0.422078	0	22	22	false	1160.73	0	0	false	0	ENSDARG00000037177	0
ENSDARG00000036494			0	0	0	0.5	0	4	4	false	1182.75	0	0	false	0	ENSDARG00000036494	0
ENSDARG00000035781			0	0	0	0.373846	0	26	26	false	1166.92	0	0	false	0	ENSDARG00000035781	0
ENSDARG00000035771			0	0	0	0.383077	0	26	26	false	1100.31	0	0	false	0	ENSDARG00000035771	0
ENSDARG00000035564			0	0	0	0.5	0	6	6	false	1225.17	0	0	false	0	ENSDARG00000035564	0
ENSDARG00000035540			0	0	0	0.464912	0	19	19	false	1123.16	0	0	false	0	ENSDARG00000035540	0
ENSDARG00000034309			0	0	0	0.426901	0	19	19	false	1105.95	0	0	false	0	ENSDARG00000034309	0
ENSDARG00000034001			0	0	0	0.442308	0	13	13	false	1123.77	0	0	false	0	ENSDARG00000034001	0
ENSDARG00000033647			0	0	0	0.5	0	6	6	false	1268	0	0	false	0	ENSDARG00000033647	0
ENSDARG00000032637			0	0	0	0.474359	0	13	13	false	1284.38	0	0	false	0	ENSDARG00000032637	0
ENSDARG00000030340			0	0	0	0.4625	0	16	16	false	1241.44	0	0	false	0	ENSDARG00000030340	0
ENSDARG00000029944			0	0	0	0.371377	0	24	24	false	1060.58	0	0	false	0	ENSDARG00000029944	0
ENSDARG00000029931			0	0	0	0.396667	0	25	25	false	1201.24	0	0	false	0	ENSDARG00000029931	0
ENSDARG00000027131			0	0	0	0.464427	0	23	23	false	1180.22	0	0	false	0	ENSDARG00000027131	0
ENSDARG00000025605			0	0	0	0.433333	0	10	10	false	1264.6	0	0	false	0	ENSDARG00000025605	0
ENSDARG00000024681			0	0	0	0.391813	0	19	19	false	1196.37	0	0	false	0	ENSDARG00000024681	0
ENSDARG00000024306			0	0	0	0.435	0	25	25	false	1165.32	0	0	false	0	ENSDARG00000024306	0
ENSDARG00000022564			0	0	0	0.422101	0	24	24	false	1108.71	0	0	false	0	ENSDARG00000022564	0
ENSDARG00000021611			0	0	0	0.42029	0	24	24	false	1177.62	0	0	false	0	ENSDARG00000021611	0
ENSDARG00000020527			0	0	0	0.45098	0	18	18	false	1260.22	0	0	false	0	ENSDARG00000020527	0
ENSDARG00000020204			0	0	0	0.319444	0	9	9	false	1084.67	0	0	false	0	ENSDARG00000020204	0
ENSDARG00000018956			0	0	0	0.4625	0	16	16	false	1230	0	0	false	0	ENSDARG00000018956	0
ENSDARG00000018006			0	0	0	0.454248	0	18	18	false	1186.11	0	0	false	0	ENSDARG00000018006	0
ENSDARG00000017901			0	0	0	0.383333	0	16	16	false	1044.44	0	0	false	0	ENSDARG00000017901	0
ENSDARG00000017748	-1.2754	-0.993475	0	0	0	0.454762	0	21	21	false	1231.1	0	0	false	0	ENSDARG00000017748	0	arhgap29b
ENSDARG00000017359			0	0	0	0.461538	0	13	13	false	1220.08	0	0	false	0	ENSDARG00000017359	0
ENSDARG00000017311			0	0	0	0.371667	0	25	25	false	1002.52	0	0	false	0	ENSDARG00000017311	0
ENSDARG00000015851			0	0	0	0.450549	0	14	14	false	1264.64	0	0	false	0	ENSDARG00000015851	0
ENSDARG00000015392			0	0	0	0.5	0	7	7	false	1266.71	0	0	false	0	ENSDARG00000015392	0
ENSDARG00000015070			0	0	0	0.401538	0	26	26	false	1167.31	0	0	false	0	ENSDARG00000015070	0
ENSDARG00000013719			0	0	0	0.404762	0	21	21	false	1057.05	0	0	false	0	ENSDARG00000013719	0
ENSDARG00000013457			0	0	0	0.383333	0	16	16	false	1170.62	0	0	false	0	ENSDARG00000013457	0
ENSDARG00000010423			0	0	0	0.436594	0	24	24	false	1158.08	0	0	false	0	ENSDARG00000010423	0
ENSDARG00000010280			0	0	0	0.418182	0	11	11	false	1199.64	0	0	false	0	ENSDARG00000010280	0
ENSDARG00000009209			0	0	0	0.411067	0	23	23	false	1103.17	0	0	false	0	ENSDARG00000009209	0
ENSDARG00000009131			0	0	0	0.402597	0	22	22	false	1173.64	0	0	false	0	ENSDARG00000009131	0
ENSDARG00000007217			0	0	0	0.433333	0	6	6	false	1153.83	0	0	false	0	ENSDARG00000007217	0
ENSDARG00000006666			0	0	0	0.416667	0	4	4	false	1299.25	0	0	false	0	ENSDARG00000006666	0
ENSDARG00000006527			0	0	0	0.4	0	10	10	false	1072.7	0	0	false	0	ENSDARG00000006527	0
ENSDARG00000006272			0	0	0	0.357143	0	7	7	false	1154.71	0	0	false	0	ENSDARG00000006272	0
ENSDARG00000006192			0	0	0	0.5	0	5	5	false	1186	0	0	false	0	ENSDARG00000006192	0
ENSDARG00000005774			0	0	0	0.385375	0	23	23	false	1187.17	0	0	false	0	ENSDARG00000005774	0
ENSDARG00000005772			0	0	0	0.395604	0	14	14	false	1189.57	0	0	false	0	ENSDARG00000005772	0
ENSDARG00000005762			0	0	0	0.401099	0	14	14	false	1205.21	0	0	false	0	ENSDARG00000005762	0
ENSDARG00000105800			0	0	0	0.233333	0	6	6	false	1019.83	0	0	false	0	ENSDARG00000105800	0
ENSDARG00000104588			0	0	0	0.363636	0	23	23	false	1061.87	0	0	false	0	ENSDARG00000104588	0
ENSDARG00000104374			0	0	0	0.41	0	25	25	false	1158.28	0	0	false	0	ENSDARG00000104374	0
ENSDARG00000104285			0	0	0	0.346405	0	18	18	false	992.111	0	0	false	0	ENSDARG00000104285	0
ENSDARG00000103722			0	0	0	0.25	0	5	5	false	1120	0	0	false	0	ENSDARG00000103722	0
ENSDARG00000103578			0	0	0	0.361905	0	21	21	false	1077.71	0	0	false	0	ENSDARG00000103578	0
ENSDARG00000102831			0	0	0	0.359684	0	23	23	false	1142.74	0	0	false	0	ENSDARG00000102831	0
ENSDARG00000102806			0	0	0	0.32684	0	22	22	false	995.955	0	0	false	0	ENSDARG00000102806	0
ENSDARG00000102746			0	0	0	0.373188	0	24	24	false	1164.96	0	0	false	0	ENSDARG00000102746	0
ENSDARG00000102428			0	0	0	0.380645	0	31	31	false	1023.03	0	0	false	0	ENSDARG00000102428	0
ENSDARG00000101637			0	0	0	0.368421	0	20	20	false	1178.65	0	0	false	0	ENSDARG00000101637	0
ENSDARG00000100013			0	0	0	0.380117	0	19	19	false	1140.21	0	0	false	0	ENSDARG00000100013	0
ENSDARG00000099921			0	0	0	0.335979	0	28	28	false	1016.29	0	0	false	0	ENSDARG00000099921	0
ENSDARG00000099619			0	0	0	0.3	0	5	5	false	803.4	0	0	false	0	ENSDARG00000099619	0
ENSDARG00000099518			0	0	0	0.384615	0	14	14	false	1225.29	0	0	false	0	ENSDARG00000099518	0
ENSDARG00000099298			0	0	0	0.396739	0	24	24	false	1230.17	0	0	false	0	ENSDARG00000099298	0
ENSDARG00000098897			0	0	0	0.365613	0	23	23	false	1210.26	0	0	false	0	ENSDARG00000098897	0
ENSDARG00000098550			0	0	0	0.35	0	20	20	false	1013.35	0	0	false	0	ENSDARG00000098550	0
ENSDARG00000095590			0	0	0	0.356061	0	12	12	false	1069.17	0	0	false	0	ENSDARG00000095590	0
ENSDARG00000092816			0	0	0	0.363971	0	17	17	false	1194.06	0	0	false	0	ENSDARG00000092816	0
ENSDARG00000091777			0	0	0	0.388889	0	19	19	false	1162.63	0	0	false	0	ENSDARG00000091777	0
ENSDARG00000090935			0	0	0	0.394737	0	20	20	false	1204.3	0	0	false	0	ENSDARG00000090935	0
ENSDARG00000090638			0	0	0	0.404412	0	17	17	false	1168.59	0	0	false	0	ENSDARG00000090638	0
ENSDARG00000090304			0	0	0	0.394737	0	19	19	false	1245.11	0	0	false	0	ENSDARG00000090304	0
ENSDARG00000089719			0	0	0	0.32967	0	14	14	false	903.857	0	0	false	0	ENSDARG00000089719	0
ENSDARG00000089071			0	0	0	0.328947	0	20	20	false	1152.8	0	0	false	0	ENSDARG00000089071	0
ENSDARG00000088160			0	0	0	0.430556	0	9	9	false	1006	0	0	false	0	ENSDARG00000088160	0
ENSDARG00000087483			0	0	0	0.420833	0	16	16	false	1160.12	0	0	false	0	ENSDARG00000087483	0
ENSDARG00000087453			0	0	0	0.363636	0	12	12	false	1187.67	0	0	false	0	ENSDARG00000087453	0
ENSDARG00000086052			0	0	0	0.365789	0	20	20	false	1156	0	0	false	0	ENSDARG00000086052	0
ENSDARG00000079860			0	0	0	0.404762	0	7	7	false	959.143	0	0	false	0	ENSDARG00000079860	0
ENSDARG00000079725			0	0	0	0.32381	0	15	15	false	1113.4	0	0	false	0	ENSDARG00000079725	0
ENSDARG00000079688			0	0	0	0.407609	0	24	24	false	1125.75	0	0	false	0	ENSDARG00000079688	0
ENSDARG00000079220			0	0	0	0.363636	0	23	23	false	1031.96	0	0	false	0	ENSDARG00000079220	0
ENSDARG00000078992			0	0	0	0.393162	0	27	27	false	1064.63	0	0	false	0	ENSDARG00000078992	0
ENSDARG00000077823			0	0	0	0.373626	0	14	14	false	1174.79	0	0	false	0	ENSDARG00000077823	0
ENSDARG00000077822			0	0	0	0.345833	0	16	16	false	1191.5	0	0	false	0	ENSDARG00000077822	0
ENSDARG00000077587			0	0	0	0.375	0	25	25	false	1132.6	0	0	false	0	ENSDARG00000077587	0
ENSDARG00000076919			0	0	0	0.381667	0	25	25	false	1044.28	0	0	false	0	ENSDARG00000076919	0
ENSDARG00000076791			0	0	0	0.408333	0	25	25	false	1172.92	0	0	false	0	ENSDARG00000076791	0
ENSDARG00000076594			0	0	0	0.407143	0	21	21	false	1079.62	0	0	false	0	ENSDARG00000076594	0
ENSDARG00000076437			0	0	0	0.363636	0	11	11	false	1253.82	0	0	false	0	ENSDARG00000076437	0
ENSDARG00000076297			0	0	0	0.3	0	6	6	false	1093.67	0	0	false	0	ENSDARG00000076297	0
ENSDARG00000075421			0	0	0	0.375	0	24	24	false	1135.38	0	0	false	0	ENSDARG00000075421	0
ENSDARG00000074645			0	0	0	0.373846	0	26	26	false	1143.04	0	0	false	0	ENSDARG00000074645	0
ENSDARG00000074581			0	0	0	0.347222	0	9	9	false	1036.44	0	0	false	0	ENSDARG00000074581	0
ENSDARG00000074231			0	0	0	0.410256	0	13	13	false	1186.62	0	0	false	0	ENSDARG00000074231	0
ENSDARG00000071694			0	0	0	0.37619	0	21	21	false	1173.57	0	0	false	0	ENSDARG00000071694	0
ENSDARG00000070698			0	0	0	0.384615	0	13	13	false	1205.77	0	0	false	0	ENSDARG00000070698	0
ENSDARG00000070025			0	0	0	0.431373	0	18	18	false	1122.33	0	0	false	0	ENSDARG00000070025	0
ENSDARG00000069649			0	0	0	0.393281	0	23	23	false	1143.39	0	0	false	0	ENSDARG00000069649	0
ENSDARG00000068726			0	0	0	0.385621	0	18	18	false	1067.5	0	0	false	0	ENSDARG00000068726	0
ENSDARG00000067918			0	0	0	0.404762	0	15	15	false	1275.33	0	0	false	0	ENSDARG00000067918	0
ENSDARG00000063412			0	0	0	0.414286	0	15	15	false	1248	0	0	false	0	ENSDARG00000063412	0
ENSDARG00000062457			0	0	0	0.444444	0	10	10	false	1078.2	0	0	false	0	ENSDARG00000062457	0
ENSDARG00000062266			0	0	0	0.358462	0	26	26	false	1152.54	0	0	false	0	ENSDARG00000062266	0
ENSDARG00000061478			0	0	0	0.407143	0	21	21	false	1210.14	0	0	false	0	ENSDARG00000061478	0
ENSDARG00000060506			0	0	0	0.421569	0	18	18	false	1239.44	0	0	false	0	ENSDARG00000060506	0
ENSDARG00000060106			0	0	0	0.378307	0	28	28	false	1103.43	0	0	false	0	ENSDARG00000060106	0
ENSDARG00000060030			0	0	0	0.412088	0	14	14	false	1233	0	0	false	0	ENSDARG00000060030	0
ENSDARG00000060021			0	0	0	0.446429	0	8	8	false	1185	0	0	false	0	ENSDARG00000060021	0
ENSDARG00000058660			0	0	0	0.408088	0	17	17	false	1095.12	0	0	false	0	ENSDARG00000058660	0
ENSDARG00000058598			0	0	0	0.376667	0	25	25	false	1167.68	0	0	false	0	ENSDARG00000058598	0
ENSDARG00000058100	-3.02226	-4.08047	0	0	0	0.295833	0	16	16	false	1152.5	0	0	false	0	ENSDARG00000058100	0	b3gnt3
ENSDARG00000057973			0	0	0	0.4125	0	16	16	false	1189.44	0	0	false	0	ENSDARG00000057973	0
ENSDARG00000057583			0	0	0	0.415	0	25	25	false	1142.68	0	0	false	0	ENSDARG00000057583	0
ENSDARG00000057249			0	0	0	0.15	0	5	5	false	980.2	0	0	false	0	ENSDARG00000057249	0
ENSDARG00000055563			0	0	0	0.379121	0	14	14	false	1172.21	0	0	false	0	ENSDARG00000055563	0
ENSDARG00000055133			0	0	0	0.403162	0	23	23	false	1105.65	0	0	false	0	ENSDARG00000055133	0
ENSDARG00000055124			0	0	0	0.357143	0	21	21	false	1128.52	0	0	false	0	ENSDARG00000055124	0
ENSDARG00000053906			0	0	0	0.356667	0	25	25	false	1137.44	0	0	false	0	ENSDARG00000053906	0
ENSDARG00000053744			0	0	0	0.391667	0	16	16	false	1227.81	0	0	false	0	ENSDARG00000053744	0
ENSDARG00000051737			0	0	0	0.3375	0	16	16	false	945.938	0	0	false	0	ENSDARG00000051737	0
ENSDARG00000046071			0	0	0	0.341897	0	23	23	false	1129.48	0	0	false	0	ENSDARG00000046071	0
ENSDARG00000044485			0	0	0	0.423077	0	14	14	false	1165.14	0	0	false	0	ENSDARG00000044485	0
ENSDARG00000043587			0	0	0	0.347222	0	9	9	false	1208.44	0	0	false	0	ENSDARG00000043587	0
ENSDARG00000043559			0	0	0	0.35	0	5	5	false	1216.4	0	0	false	0	ENSDARG00000043559	0
ENSDARG00000043247			0	0	0	0.333333	0	12	12	false	1022.67	0	0	false	0	ENSDARG00000043247	0
ENSDARG00000042887			0	0	0	0.366667	0	10	10	false	1170.9	0	0	false	0	ENSDARG00000042887	0
ENSDARG00000042724			0	0	0	0.340909	0	12	12	false	1124.67	0	0	false	0	ENSDARG00000042724	0
ENSDARG00000042025			0	0	0	0.409524	0	21	21	false	1210.48	0	0	false	0	ENSDARG00000042025	0
ENSDARG00000041586			0	0	0	0.360294	0	17	17	false	1140.12	0	0	false	0	ENSDARG00000041586	0
ENSDARG00000038909			0	0	0	0.405	0	25	25	false	1104.64	0	0	false	0	ENSDARG00000038909	0
ENSDARG00000038847			0	0	0	0.398268	0	22	22	false	1142.14	0	0	false	0	ENSDARG00000038847	0
ENSDARG00000038442			0	0	0	0.418301	0	18	18	false	1228.28	0	0	false	0	ENSDARG00000038442	0
ENSDARG00000038422			0	0	0	0.419048	0	15	15	false	1225.2	0	0	false	0	ENSDARG00000038422	0
ENSDARG00000038066			0	0	0	0.388095	0	21	21	false	1183.33	0	0	false	0	ENSDARG00000038066	0
ENSDARG00000036359			0	0	0	0.416667	0	25	25	false	1147.6	0	0	false	0	ENSDARG00000036359	0
ENSDARG00000035700			0	0	0	0.359524	0	21	21	false	1138.14	0	0	false	0	ENSDARG00000035700	0
ENSDARG00000034203			0	0	0	0.381818	0	11	11	false	1027.82	0	0	false	0	ENSDARG00000034203	0
ENSDARG00000034178			0	0	0	0.428947	0	20	20	false	1195.5	0	0	false	0	ENSDARG00000034178	0
ENSDARG00000033852			0	0	0	0.263889	0	9	9	false	1033.89	0	0	false	0	ENSDARG00000033852	0
ENSDARG00000029724			0	0	0	0.372727	0	11	11	false	1241.18	0	0	false	0	ENSDARG00000029724	0
ENSDARG00000028971			0	0	0	0.401961	0	18	18	false	1219.83	0	0	false	0	ENSDARG00000028971	0
ENSDARG00000028663			0	0	0	0.277778	0	10	10	false	1025.1	0	0	false	0	ENSDARG00000028663	0
ENSDARG00000026329			0	0	0	0.330688	0	28	28	false	1019.29	0	0	false	0	ENSDARG00000026329	0
ENSDARG00000021812			0	0	0	0.354762	0	21	21	false	1175.33	0	0	false	0	ENSDARG00000021812	0
ENSDARG00000020465			0	0	0	0.339744	0	13	13	false	930.692	0	0	false	0	ENSDARG00000020465	0
ENSDARG00000019728			0	0	0	0.393382	0	17	17	false	1101.76	0	0	false	0	ENSDARG00000019728	0
ENSDARG00000018623			0	0	0	0.318182	0	23	23	false	1062.78	0	0	false	0	ENSDARG00000018623	0
ENSDARG00000016789			0	0	0	0.367647	0	17	17	false	1163.59	0	0	false	0	ENSDARG00000016789	0
ENSDARG00000016139			0	0	0	0.422222	0	10	10	false	1206.6	0	0	false	0	ENSDARG00000016139	0
ENSDARG00000015111			0	0	0	0.395238	0	15	15	false	1241.13	0	0	false	0	ENSDARG00000015111	0
ENSDARG00000014976			0	0	0	0.393939	0	22	22	false	1172.82	0	0	false	0	ENSDARG00000014976	0
ENSDARG00000014963			0	0	0	0.345455	0	11	11	false	1247.91	0	0	false	0	ENSDARG00000014963	0
ENSDARG00000014395			0	0	0	0.381766	0	27	27	false	1094.89	0	0	false	0	ENSDARG00000014395	0
ENSDARG00000012519			0	0	0	0.388333	0	25	25	false	1164.52	0	0	false	0	ENSDARG00000012519	0
ENSDARG00000010934			0	0	0	0.388889	0	9	9	false	1093.11	0	0	false	0	ENSDARG00000010934	0
ENSDARG00000009953			0	0	0	0.366154	0	26	26	false	1103.38	0	0	false	0	ENSDARG00000009953	0
ENSDARG00000009689			0	0	0	0.366667	0	10	10	false	1152.8	0	0	false	0	ENSDARG00000009689	0
ENSDARG00000009346			0	0	0	0.428571	0	14	14	false	1212.71	0	0	false	0	ENSDARG00000009346	0
ENSDARG00000008333	-6.56145	-2.07652	0	0	0	0.421053	0	19	19	false	1246.42	0	0	false	0	ENSDARG00000008333	0	znfl2a
ENSDARG00000008184	-0.891215	-1.01578	0	0	0	0.373846	0	26	26	false	1124.73	0	0	false	0	ENSDARG00000008184	0	mia3
ENSDARG00000006524			0	0	0	0.371429	0	15	15	false	1160.33	0	0	false	0	ENSDARG00000006524	0
ENSDARG00000005462			0	0	0	0.336364	0	11	11	false	1124.91	0	0	false	0	ENSDARG00000005462	0
ENSDARG00000005254			0	0	0	0.448718	0	13	13	false	1350.77	0	0	false	0	ENSDARG00000005254	0
ENSDARG00000005236			0	0	0	0.45098	0	18	18	false	1251.72	0	0	false	0	ENSDARG00000005236	0
ENSDARG00000005098			0	0	0	0.371053	0	20	20	false	1180.1	0	0	false	0	ENSDARG00000005098	0
ENSDARG00000005092			0	0	0	0.455128	0	13	13	false	1106.31	0	0	false	0	ENSDARG00000005092	0
ENSDARG00000004937			0	0	0	0.488889	0	10	10	false	1326.8	0	0	false	0	ENSDARG00000004937	0
ENSDARG00000004735			0	0	0	0.373518	0	23	23	false	1092.35	0	0	false	0	ENSDARG00000004735	0
ENSDARG00000004647			0	0	0	0.388889	0	9	9	false	1233.89	0	0	false	0	ENSDARG00000004647	0
ENSDARG00000004574			0	0	0	0.441558	0	22	22	false	1231.55	0	0	false	0	ENSDARG00000004574	0
ENSDARG00000004452			0	0	0	0.454545	0	11	11	false	1348.82	0	0	false	0	ENSDARG00000004452	0
ENSDARG00000004396			0	0	0	0.354545	0	11	11	false	1040.73	0	0	false	0	ENSDARG00000004396	0
ENSDARG00000004105			0	0	0	0.5	0	4	4	false	1244.75	0	0	false	0	ENSDARG00000004105	0
ENSDARG00000004051			0	0	0	0.5	0	6	6	false	1291.17	0	0	false	0	ENSDARG00000004051	0
ENSDARG00000003157			0	0	0	0.371345	0	19	19	false	1197.05	0	0	false	0	ENSDARG00000003157	0
ENSDARG00000003021			0	0	0	0.472222	0	9	9	false	1361.33	0	0	false	0	ENSDARG00000003021	0
ENSDARG00000002952			0	0	0	0.390909	0	11	11	false	1257	0	0	false	0	ENSDARG00000002952	0
ENSDARG00000002933			0	0	0	0.362434	0	28	28	false	1091.21	0	0	false	0	ENSDARG00000002933	0
ENSDARG00000002830			0	0	0	0.5	0	4	4	false	1138	0	0	false	0	ENSDARG00000002830	0
ENSDARG00000105601			0	0	0	0.5	0	9	9	false	1261.33	0	0	false	0	ENSDARG00000105601	0
ENSDARG00000105496			0	0	0	0.433333	0	21	21	false	1202.95	0	0	false	0	ENSDARG00000105496	0
ENSDARG00000105437			0	0	0	0.462121	0	12	12	false	1266.83	0	0	false	0	ENSDARG00000105437	0
ENSDARG00000105397			0	0	0	0.388889	0	18	18	false	1073.33	0	0	false	0	ENSDARG00000105397	0
ENSDARG00000105174			0	0	0	0.5	0	3	3	false	763	0	0	false	0	ENSDARG00000105174	0
ENSDARG00000105102			0	0	0	0.444444	0	19	19	false	1270.37	0	0	false	0	ENSDARG00000105102	0
ENSDARG00000104783			0	0	0	0.380952	0	7	7	false	1123	0	0	false	0	ENSDARG00000104783	0
ENSDARG00000104771			0	0	0	0.425725	0	24	24	false	1158.29	0	0	false	0	ENSDARG00000104771	0
ENSDARG00000104719			0	0	0	0.448333	0	25	25	false	1139.48	0	0	false	0	ENSDARG00000104719	0
ENSDARG00000104659			0	0	0	0.5	0	3	3	false	1188.67	0	0	false	0	ENSDARG00000104659	0
ENSDARG00000104657			0	0	0	0.339181	0	19	19	false	1072.58	0	0	false	0	ENSDARG00000104657	0
ENSDARG00000104501			0	0	0	0.396104	0	22	22	false	1042.73	0	0	false	0	ENSDARG00000104501	0
ENSDARG00000104453			0	0	0	0.462121	0	12	12	false	1289	0	0	false	0	ENSDARG00000104453	0
ENSDARG00000104404			0	0	0	0.455263	0	20	20	false	1282.2	0	0	false	0	ENSDARG00000104404	0
ENSDARG00000104316			0	0	0	0.38	0	25	25	false	1082.2	0	0	false	0	ENSDARG00000104316	0
ENSDARG00000104283			0	0	0	0.461905	0	21	21	false	1155.76	0	0	false	0	ENSDARG00000104283	0
ENSDARG00000104280			0	0	0	0.392857	0	8	8	false	1258.38	0	0	false	0	ENSDARG00000104280	0
ENSDARG00000104199			0	0	0	0.436842	0	20	20	false	1219.5	0	0	false	0	ENSDARG00000104199	0
ENSDARG00000103961			0	0	0	0.450549	0	14	14	false	1221.57	0	0	false	0	ENSDARG00000103961	0
ENSDARG00000103953			0	0	0	0.403509	0	19	19	false	1218.16	0	0	false	0	ENSDARG00000103953	0
ENSDARG00000103787			0	0	0	0.44	0	25	25	false	1203.12	0	0	false	0	ENSDARG00000103787	0
ENSDARG00000103754			0	0	0	0.44152	0	19	19	false	1194.21	0	0	false	0	ENSDARG00000103754	0
ENSDARG00000103682			0	0	0	0.447464	0	24	24	false	1197.21	0	0	false	0	ENSDARG00000103682	0
ENSDARG00000103525			0	0	0	0.369565	0	23	23	false	1137.26	0	0	false	0	ENSDARG00000103525	0
ENSDARG00000103370			0	0	0	0.444737	0	20	20	false	1263.4	0	0	false	0	ENSDARG00000103370	0
ENSDARG00000103297			0	0	0	0.405797	0	24	24	false	1230.71	0	0	false	0	ENSDARG00000103297	0
ENSDARG00000103294			0	0	0	0.387352	0	23	23	false	1153.91	0	0	false	0	ENSDARG00000103294	0
ENSDARG00000103284			0	0	0	0.396739	0	24	24	false	1188.08	0	0	false	0	ENSDARG00000103284	0
ENSDARG00000102960			0	0	0	0.347692	0	26	26	false	1145.04	0	0	false	0	ENSDARG00000102960	0
ENSDARG00000102832			0	0	0	0.411494	0	30	30	false	1099.9	0	0	false	0	ENSDARG00000102832	0
ENSDARG00000102748			0	0	0	0.417582	0	14	14	false	1153.64	0	0	false	0	ENSDARG00000102748	0
ENSDARG00000102463			0	0	0	0.430769	0	26	26	false	1141.08	0	0	false	0	ENSDARG00000102463	0
ENSDARG00000102366			0	0	0	0.395425	0	18	18	false	1200	0	0	false	0	ENSDARG00000102366	0
ENSDARG00000102252			0	0	0	0.421053	0	20	20	false	1216.9	0	0	false	0	ENSDARG00000102252	0
ENSDARG00000102033			0	0	0	0.442308	0	13	13	false	1231.54	0	0	false	0	ENSDARG00000102033	0
ENSDARG00000101911			0	0	0	0.380952	0	15	15	false	1203.07	0	0	false	0	ENSDARG00000101911	0
ENSDARG00000101876			0	0	0	0.397059	0	17	17	false	1041.29	0	0	false	0	ENSDARG00000101876	0
ENSDARG00000101477			0	0	0	0.457895	0	20	20	false	1234.65	0	0	false	0	ENSDARG00000101477	0
ENSDARG00000101465			0	0	0	0.419048	0	15	15	false	1085.27	0	0	false	0	ENSDARG00000101465	0
ENSDARG00000101180			0	0	0	0.403439	0	28	28	false	1109.29	0	0	false	0	ENSDARG00000101180	0
ENSDARG00000101096			0	0	0	0.486111	0	9	9	false	1249.56	0	0	false	0	ENSDARG00000101096	0
ENSDARG00000101060			0	0	0	0.42029	0	24	24	false	1187.88	0	0	false	0	ENSDARG00000101060	0
ENSDARG00000101024			0	0	0	0.392857	0	8	8	false	1120.75	0	0	false	0	ENSDARG00000101024	0
ENSDARG00000100965			0	0	0	0.469697	0	12	12	false	1121.33	0	0	false	0	ENSDARG00000100965	0
ENSDARG00000100918			0	0	0	0.402381	0	21	21	false	1182	0	0	false	0	ENSDARG00000100918	0
ENSDARG00000100839			0	0	0	0.457516	0	18	18	false	1139.83	0	0	false	0	ENSDARG00000100839	0
ENSDARG00000100773			0	0	0	0.42	0	25	25	false	1131.24	0	0	false	0	ENSDARG00000100773	0
ENSDARG00000100666			0	0	0	0.452206	0	17	17	false	1210.41	0	0	false	0	ENSDARG00000100666	0
ENSDARG00000100641			0	0	0	0.401149	0	30	30	false	1086.27	0	0	false	0	ENSDARG00000100641	0
ENSDARG00000100558			0	0	0	0.387566	0	28	28	false	1118.71	0	0	false	0	ENSDARG00000100558	0
ENSDARG00000100536			0	0	0	0.4	0	15	15	false	1235.4	0	0	false	0	ENSDARG00000100536	0
ENSDARG00000100455			0	0	0	0.404762	0	21	21	false	1125	0	0	false	0	ENSDARG00000100455	0
ENSDARG00000100031			0	0	0	0.373518	0	23	23	false	1017.39	0	0	false	0	ENSDARG00000100031	0
ENSDARG00000099986			0	0	0	0.361111	0	9	9	false	1022.44	0	0	false	0	ENSDARG00000099986	0
ENSDARG00000099849	-2.07059	-1.32701	0	0	0	0.466667	0	16	16	false	1258.69	0	0	false	0	ENSDARG00000099849	0	ebf3a
ENSDARG00000099705			0	0	0	0.421667	0	25	25	false	1089.88	0	0	false	0	ENSDARG00000099705	0
ENSDARG00000099684			0	0	0	0.463636	0	11	11	false	1282.45	0	0	false	0	ENSDARG00000099684	0
ENSDARG00000099431			0	0	0	0.423333	0	25	25	false	1153.64	0	0	false	0	ENSDARG00000099431	0
ENSDARG00000099396			0	0	0	0.434066	0	14	14	false	1190.93	0	0	false	0	ENSDARG00000099396	0
ENSDARG00000099385			0	0	0	0.411667	0	25	25	false	1186.16	0	0	false	0	ENSDARG00000099385	0
ENSDARG00000099379			0	0	0	0.428105	0	18	18	false	1202.17	0	0	false	0	ENSDARG00000099379	0
ENSDARG00000099274			0	0	0	0.404762	0	21	21	false	1190.48	0	0	false	0	ENSDARG00000099274	0
ENSDARG00000099139			0	0	0	0.385714	0	21	21	false	1145.48	0	0	false	0	ENSDARG00000099139	0
ENSDARG00000099080			0	0	0	0.406926	0	22	22	false	1088.82	0	0	false	0	ENSDARG00000099080	0
ENSDARG00000099078			0	0	0	0.411765	0	17	17	false	1144	0	0	false	0	ENSDARG00000099078	0
ENSDARG00000099049			0	0	0	0.426316	0	20	20	false	1192.95	0	0	false	0	ENSDARG00000099049	0
ENSDARG00000098654			0	0	0	0.454545	0	12	12	false	1271.33	0	0	false	0	ENSDARG00000098654	0
ENSDARG00000098529			0	0	0	0.400362	0	24	24	false	1086.25	0	0	false	0	ENSDARG00000098529	0
ENSDARG00000098235			0	0	0	0.381423	0	23	23	false	1187.43	0	0	false	0	ENSDARG00000098235	0
ENSDARG00000098211			0	0	0	0.357143	0	14	14	false	1207.64	0	0	false	0	ENSDARG00000098211	0
ENSDARG00000098118			0	0	0	0.380952	0	7	7	false	858.571	0	0	false	0	ENSDARG00000098118	0
ENSDARG00000097845			0	0	0	0.378623	0	24	24	false	1107.58	0	0	false	0	ENSDARG00000097845	0
ENSDARG00000097836	-2.44963	-1.18052	0	0	0	0.445455	0	11	11	false	1266	0	0	false	0	ENSDARG00000097836	0	h3c
ENSDARG00000097496			0	0	0	0.444444	0	18	18	false	1191.89	0	0	false	0	ENSDARG00000097496	0
ENSDARG00000097478			0	0	0	0.378788	0	12	12	false	1222.92	0	0	false	0	ENSDARG00000097478	0
ENSDARG00000097258			0	0	0	0.407143	0	21	21	false	1147.52	0	0	false	0	ENSDARG00000097258	0
ENSDARG00000097189			0	0	0	0.39532	0	29	29	false	1108.41	0	0	false	0	ENSDARG00000097189	0
ENSDARG00000096951			0	0	0	0.384211	0	20	20	false	1190.2	0	0	false	0	ENSDARG00000096951	0
ENSDARG00000096855			0	0	0	0.401961	0	18	18	false	1084.61	0	0	false	0	ENSDARG00000096855	0
ENSDARG00000096421			0	0	0	0.37381	0	21	21	false	1192.86	0	0	false	0	ENSDARG00000096421	0
ENSDARG00000095962			0	0	0	0.386667	0	25	25	false	1101.76	0	0	false	0	ENSDARG00000095962	0
ENSDARG00000095304			0	0	0	0.389231	0	26	26	false	1053.65	0	0	false	0	ENSDARG00000095304	0
ENSDARG00000095142			0	0	0	0.455128	0	13	13	false	1170.54	0	0	false	0	ENSDARG00000095142	0
ENSDARG00000095019	-4.62702	-2.03143	0	0	0	0.394089	0	29	29	false	1104.45	0	0	false	0	ENSDARG00000095019	0	lmo2
ENSDARG00000094725			0	0	0	0.424615	0	26	26	false	1165.12	0	0	false	0	ENSDARG00000094725	0
ENSDARG00000094249			0	0	0	0.486111	0	9	9	false	1320.78	0	0	false	0	ENSDARG00000094249	0
ENSDARG00000094154			0	0	0	0.409091	0	12	12	false	1176.5	0	0	false	0	ENSDARG00000094154	0
ENSDARG00000094018			0	0	0	0.405797	0	24	24	false	1191.5	0	0	false	0	ENSDARG00000094018	0
ENSDARG00000093563			0	0	0	0.461538	0	13	13	false	1270.92	0	0	false	0	ENSDARG00000093563	0
ENSDARG00000093423			0	0	0	0.387446	0	22	22	false	1106.14	0	0	false	0	ENSDARG00000093423	0
ENSDARG00000093406			0	0	0	0.431373	0	18	18	false	1111.89	0	0	false	0	ENSDARG00000093406	0
ENSDARG00000093195			0	0	0	0.366667	0	15	15	false	948.4	0	0	false	0	ENSDARG00000093195	0
ENSDARG00000093125			0	0	0	0.472222	0	9	9	false	1260.44	0	0	false	0	ENSDARG00000093125	0
ENSDARG00000093120			0	0	0	0.457516	0	18	18	false	1243.17	0	0	false	0	ENSDARG00000093120	0
ENSDARG00000092463			0	0	0	0.472727	0	11	11	false	1214.27	0	0	false	0	ENSDARG00000092463	0
ENSDARG00000092337			0	0	0	0.428571	0	15	15	false	1147	0	0	false	0	ENSDARG00000092337	0
ENSDARG00000092216			0	0	0	0.44697	0	12	12	false	1255.42	0	0	false	0	ENSDARG00000092216	0
ENSDARG00000092199			0	0	0	0.386154	0	26	26	false	1083.69	0	0	false	0	ENSDARG00000092199	0
ENSDARG00000091947			0	0	0	0.430556	0	9	9	false	995.444	0	0	false	0	ENSDARG00000091947	0
ENSDARG00000091656			0	0	0	0.380952	0	21	21	false	1193.95	0	0	false	0	ENSDARG00000091656	0
ENSDARG00000090904			0	0	0	0.423913	0	24	24	false	1198.17	0	0	false	0	ENSDARG00000090904	0
ENSDARG00000090785			0	0	0	0.486111	0	9	9	false	1036.78	0	0	false	0	ENSDARG00000090785	0
ENSDARG00000090524			0	0	0	0.442029	0	24	24	false	1184.25	0	0	false	0	ENSDARG00000090524	0
ENSDARG00000090457			0	0	0	0.428571	0	14	14	false	1062.79	0	0	false	0	ENSDARG00000090457	0
ENSDARG00000090230			0	0	0	0.426316	0	20	20	false	1114.3	0	0	false	0	ENSDARG00000090230	0
ENSDARG00000089967			0	0	0	0.366667	0	16	16	false	1164.94	0	0	false	0	ENSDARG00000089967	0
ENSDARG00000089737			0	0	0	0.355556	0	10	10	false	1180.8	0	0	false	0	ENSDARG00000089737	0
ENSDARG00000089505			0	0	0	0.410256	0	27	27	false	1089.26	0	0	false	0	ENSDARG00000089505	0
ENSDARG00000089456			0	0	0	0.41	0	25	25	false	1141.84	0	0	false	0	ENSDARG00000089456	0
ENSDARG00000089039			0	0	0	0.430736	0	22	22	false	1162.64	0	0	false	0	ENSDARG00000089039	0
ENSDARG00000088801			0	0	0	0.38961	0	22	22	false	1232.18	0	0	false	0	ENSDARG00000088801	0
ENSDARG00000088766			0	0	0	0.426316	0	20	20	false	1284.25	0	0	false	0	ENSDARG00000088766	0
ENSDARG00000088690			0	0	0	0.47619	0	7	7	false	1187.43	0	0	false	0	ENSDARG00000088690	0
ENSDARG00000088330	-3.9142	-2.43952	0	0	0	0.435065	0	22	22	false	1170.45	0	0	false	0	ENSDARG00000088330	0	hbae1
ENSDARG00000088130			0	0	0	0.453216	0	19	19	false	1144.84	0	0	false	0	ENSDARG00000088130	0
ENSDARG00000088123			0	0	0	0.428571	0	21	21	false	1218.38	0	0	false	0	ENSDARG00000088123	0
ENSDARG00000087854			0	0	0	0.434211	0	20	20	false	1122.55	0	0	false	0	ENSDARG00000087854	0
ENSDARG00000087844			0	0	0	0.373188	0	24	24	false	1137.08	0	0	false	0	ENSDARG00000087844	0
ENSDARG00000087554			0	0	0	0.438095	0	21	21	false	1244.95	0	0	false	0	ENSDARG00000087554	0
ENSDARG00000087236			0	0	0	0.375	0	17	17	false	986.235	0	0	false	0	ENSDARG00000087236	0
ENSDARG00000086927			0	0	0	0.427586	0	30	30	false	1096.43	0	0	false	0	ENSDARG00000086927	0
ENSDARG00000086708			0	0	0	0.359606	0	29	29	false	1047.31	0	0	false	0	ENSDARG00000086708	0
ENSDARG00000086670			0	0	0	0.329167	0	16	16	false	1088.06	0	0	false	0	ENSDARG00000086670	0
ENSDARG00000086505			0	0	0	0.445652	0	24	24	false	1235.42	0	0	false	0	ENSDARG00000086505	0
ENSDARG00000086112			0	0	0	0.401961	0	18	18	false	998.833	0	0	false	0	ENSDARG00000086112	0
ENSDARG00000079900			0	0	0	0.411681	0	27	27	false	1149.37	0	0	false	0	ENSDARG00000079900	0
ENSDARG00000079835			0	0	0	0.427536	0	24	24	false	1120.46	0	0	false	0	ENSDARG00000079835	0
ENSDARG00000079788			0	0	0	0.425	0	16	16	false	1237.94	0	0	false	0	ENSDARG00000079788	0
ENSDARG00000079403			0	0	0	0.426316	0	20	20	false	1201.15	0	0	false	0	ENSDARG00000079403	0
ENSDARG00000079378			0	0	0	0.433333	0	15	15	false	1245.47	0	0	false	0	ENSDARG00000079378	0
ENSDARG00000079350	-1.33952	0.688267	0	0	0	0.425725	0	24	24	false	1135.54	0	0	false	0	ENSDARG00000079350	0	znf654
ENSDARG00000079326			0	0	0	0.381579	0	20	20	false	1156.2	0	0	false	0	ENSDARG00000079326	0
ENSDARG00000079305	-2.9433	-2.1826	0	0	0	0.445652	0	24	24	false	1235.42	0	0	false	0	ENSDARG00000079305	0	hbae3
ENSDARG00000079068			0	0	0	0.472222	0	9	9	false	1276.56	0	0	false	0	ENSDARG00000079068	0
ENSDARG00000079055			0	0	0	0.430736	0	22	22	false	1120.73	0	0	false	0	ENSDARG00000079055	0
ENSDARG00000078986			0	0	0	0.166667	0	3	3	false	834	0	0	false	0	ENSDARG00000078986	0
ENSDARG00000078557			0	0	0	0.45471	0	24	24	false	1165.58	0	0	false	0	ENSDARG00000078557	0
ENSDARG00000078500			0	0	0	0.448529	0	17	17	false	1212.29	0	0	false	0	ENSDARG00000078500	0
ENSDARG00000078411			0	0	0	0.301471	0	17	17	false	1111.59	0	0	false	0	ENSDARG00000078411	0
ENSDARG00000078381			0	0	0	0.416667	0	16	16	false	1118.44	0	0	false	0	ENSDARG00000078381	0
ENSDARG00000078328			0	0	0	0.385621	0	18	18	false	1148.67	0	0	false	0	ENSDARG00000078328	0
ENSDARG00000078285			0	0	0	0.261905	0	7	7	false	1082.43	0	0	false	0	ENSDARG00000078285	0
ENSDARG00000078164			0	0	0	0.408497	0	18	18	false	1208.61	0	0	false	0	ENSDARG00000078164	0
ENSDARG00000078135			0	0	0	0.382353	0	17	17	false	1176.65	0	0	false	0	ENSDARG00000078135	0
ENSDARG00000078083			0	0	0	0.422101	0	24	24	false	1123.38	0	0	false	0	ENSDARG00000078083	0
ENSDARG00000078077			0	0	0	0.448718	0	13	13	false	1203.69	0	0	false	0	ENSDARG00000078077	0
ENSDARG00000077983			0	0	0	0.374269	0	19	19	false	1209.26	0	0	false	0	ENSDARG00000077983	0
ENSDARG00000077950			0	0	0	0.411765	0	17	17	false	1257.65	0	0	false	0	ENSDARG00000077950	0
ENSDARG00000077948			0	0	0	0.457516	0	18	18	false	1188.61	0	0	false	0	ENSDARG00000077948	0
ENSDARG00000077901			0	0	0	0.458333	0	16	16	false	1249.81	0	0	false	0	ENSDARG00000077901	0
ENSDARG00000077883			0	0	0	0.4	0	6	6	false	1150	0	0	false	0	ENSDARG00000077883	0
ENSDARG00000077860			0	0	0	0.370833	0	16	16	false	1013.5	0	0	false	0	ENSDARG00000077860	0
ENSDARG00000077788			0	0	0	0.360526	0	20	20	false	964.9	0	0	false	0	ENSDARG00000077788	0
ENSDARG00000077728			0	0	0	0.429348	0	24	24	false	1082.71	0	0	false	0	ENSDARG00000077728	0
ENSDARG00000077686			0	0	0	0.392157	0	18	18	false	1233.11	0	0	false	0	ENSDARG00000077686	0
ENSDARG00000077516			0	0	0	0.415205	0	19	19	false	1190	0	0	false	0	ENSDARG00000077516	0
ENSDARG00000077089			0	0	0	0.377011	0	30	30	false	1061.73	0	0	false	0	ENSDARG00000077089	0
ENSDARG00000077039			0	0	0	0.426667	0	25	25	false	1113.88	0	0	false	0	ENSDARG00000077039	0
ENSDARG00000076888			0	0	0	0.406154	0	26	26	false	1160.04	0	0	false	0	ENSDARG00000076888	0
ENSDARG00000076718			0	0	0	0.367725	0	28	28	false	1037.89	0	0	false	0	ENSDARG00000076718	0
ENSDARG00000076659			0	0	0	0.430556	0	9	9	false	1159.56	0	0	false	0	ENSDARG00000076659	0
ENSDARG00000076627			0	0	0	0.455128	0	13	13	false	1276.62	0	0	false	0	ENSDARG00000076627	0
ENSDARG00000076609			0	0	0	0.443333	0	25	25	false	1182.08	0	0	false	0	ENSDARG00000076609	0
ENSDARG00000076324			0	0	0	0.407692	0	26	26	false	1150.62	0	0	false	0	ENSDARG00000076324	0
ENSDARG00000076155			0	0	0	0.5	0	3	3	false	1232.33	0	0	false	0	ENSDARG00000076155	0
ENSDARG00000075923			0	0	0	0.380952	0	15	15	false	1146.73	0	0	false	0	ENSDARG00000075923	0
ENSDARG00000075842			0	0	0	0.393281	0	23	23	false	1134.65	0	0	false	0	ENSDARG00000075842	0
ENSDARG00000075824			0	0	0	0.402778	0	9	9	false	1112.33	0	0	false	0	ENSDARG00000075824	0
ENSDARG00000075805			0	0	0	0.406085	0	28	28	false	1118.43	0	0	false	0	ENSDARG00000075805	0
ENSDARG00000075687			0	0	0	0.4	0	15	15	false	1240.33	0	0	false	0	ENSDARG00000075687	0
ENSDARG00000075560			0	0	0	0.380117	0	19	19	false	1185.89	0	0	false	0	ENSDARG00000075560	0
ENSDARG00000075467			0	0	0	0.461538	0	14	14	false	1306.43	0	0	false	0	ENSDARG00000075467	0
ENSDARG00000075446			0	0	0	0.4	0	11	11	false	1099.82	0	0	false	0	ENSDARG00000075446	0
ENSDARG00000075395			0	0	0	0.387692	0	26	26	false	1129.5	0	0	false	0	ENSDARG00000075395	0
ENSDARG00000075354			0	0	0	0.391813	0	19	19	false	1125	0	0	false	0	ENSDARG00000075354	0
ENSDARG00000075296			0	0	0	0.439474	0	20	20	false	1278.25	0	0	false	0	ENSDARG00000075296	0
ENSDARG00000075072			0	0	0	0.407407	0	27	27	false	1122.19	0	0	false	0	ENSDARG00000075072	0
ENSDARG00000074909			0	0	0	0.442688	0	23	23	false	1216.35	0	0	false	0	ENSDARG00000074909	0
ENSDARG00000074804			0	0	0	0.439474	0	20	20	false	1162.15	0	0	false	0	ENSDARG00000074804	0
ENSDARG00000074759			0	0	0	0.413158	0	20	20	false	1043.9	0	0	false	0	ENSDARG00000074759	0
ENSDARG00000074597			0	0	0	0.383005	0	29	29	false	1093.1	0	0	false	0	ENSDARG00000074597	0
ENSDARG00000074533			0	0	0	0.41502	0	23	23	false	1217.04	0	0	false	0	ENSDARG00000074533	0
ENSDARG00000074166			0	0	0	0.426316	0	20	20	false	1187.65	0	0	false	0	ENSDARG00000074166	0
ENSDARG00000074074			0	0	0	0.362434	0	28	28	false	1135.93	0	0	false	0	ENSDARG00000074074	0
ENSDARG00000073970			0	0	0	0.423077	0	14	14	false	1093.57	0	0	false	0	ENSDARG00000073970	0
ENSDARG00000073710			0	0	0	0.41133	0	29	29	false	1128.83	0	0	false	0	ENSDARG00000073710	0
ENSDARG00000073686			0	0	0	0.456044	0	14	14	false	1251.93	0	0	false	0	ENSDARG00000073686	0
ENSDARG00000071570			0	0	0	0.387692	0	26	26	false	1093.96	0	0	false	0	ENSDARG00000071570	0
ENSDARG00000071009			0	0	0	0.423977	0	19	19	false	1186.79	0	0	false	0	ENSDARG00000071009	0
ENSDARG00000071005			0	0	0	0.416923	0	26	26	false	1090.92	0	0	false	0	ENSDARG00000071005	0
ENSDARG00000070705			0	0	0	0.416667	0	21	21	false	1095.38	0	0	false	0	ENSDARG00000070705	0
ENSDARG00000070431			0	0	0	0.38587	0	24	24	false	1129.92	0	0	false	0	ENSDARG00000070431	0
ENSDARG00000070287	-2.02066	-2.36856	0	0	0	0.424901	0	23	23	false	1137.61	0	0	false	0	ENSDARG00000070287	0	h3a
ENSDARG00000070254			0	0	0	0.397059	0	17	17	false	1182.71	0	0	false	0	ENSDARG00000070254	0
ENSDARG00000070127			0	0	0	0.431579	0	20	20	false	1102.45	0	0	false	0	ENSDARG00000070127	0
ENSDARG00000070124			0	0	0	0.379085	0	18	18	false	1210.33	0	0	false	0	ENSDARG00000070124	0
ENSDARG00000069998			0	0	0	0.356884	0	24	24	false	1061.38	0	0	false	0	ENSDARG00000069998	0
ENSDARG00000069893			0	0	0	0.4375	0	17	17	false	1074.76	0	0	false	0	ENSDARG00000069893	0
ENSDARG00000069832			0	0	0	0.386364	0	12	12	false	1078.42	0	0	false	0	ENSDARG00000069832	0
ENSDARG00000069632			0	0	0	0.418719	0	29	29	false	1095.66	0	0	false	0	ENSDARG00000069632	0
ENSDARG00000069390			0	0	0	0.423684	0	20	20	false	1163.25	0	0	false	0	ENSDARG00000069390	0
ENSDARG00000069318			0	0	0	0.454167	0	16	16	false	1313.31	0	0	false	0	ENSDARG00000069318	0
ENSDARG00000069280			0	0	0	0.413043	0	24	24	false	1081.29	0	0	false	0	ENSDARG00000069280	0
ENSDARG00000069031			0	0	0	0.431373	0	18	18	false	1254.39	0	0	false	0	ENSDARG00000069031	0
ENSDARG00000068894			0	0	0	0.430736	0	22	22	false	1212.64	0	0	false	0	ENSDARG00000068894	0
ENSDARG00000068759			0	0	0	0.457143	0	21	21	false	1255.81	0	0	false	0	ENSDARG00000068759	0
ENSDARG00000068438			0	0	0	0.369565	0	24	24	false	1128.67	0	0	false	0	ENSDARG00000068438	0
ENSDARG00000068434			0	0	0	0.395833	0	16	16	false	1012.88	0	0	false	0	ENSDARG00000068434	0
ENSDARG00000068417			0	0	0	0.366667	0	21	21	false	1149.29	0	0	false	0	ENSDARG00000068417	0
ENSDARG00000068217			0	0	0	0.435897	0	13	13	false	1299.31	0	0	false	0	ENSDARG00000068217	0
ENSDARG00000068143			0	0	0	0.378495	0	31	31	false	1081.26	0	0	false	0	ENSDARG00000068143	0
[truncated: 1,054 more rows]

## Sheet: turquoise_module_edge
toAltName (ZFIN_ID_or_ENSEMBL_ID)	EdgeBetweenness	fromAltName	interaction	name	selected	shared interaction	shared name	weight	TF motif match
[truncated: 55,310 more rows]

[truncated: 1 more sheets: turquoise_module_node]
