# Supplementary material for: Dynamics of cardiomyocyte transcriptome and chromatin landscape demarcates key events of heart development
Source: HighWire-hosted journal article supplement (doi:10.1101/gr.244491.118), 2019-02-13
Supplement: Supplement_Table_11.xlsx [file Supplement_Table_11.xlsx]

## Sheet: Supplement_Table_12_enhancers
Supplement Table 11. DESeq2 differentially accessible distal NFRs (more than +/- 3kb from TSS) between wild-type and TF mutants. Genomic coordinates are provided. HCNE_hu column indicates overlap (TRUE) with HCNE or lack of overlap (FALSE).
Chr	start	end	distanceToTSS	l2FC_gata5	padj_gata5	l2FC_tbx5	padj_tbx5	l2FC_hand2	padj_hand2	HCNE_hu
1	22376	22462	-3123	1.23186	1	1.15139	0.902667	1.74983	0.563411	FALSE
1	54615	54712	-4368	0.229133	1	-0.738459	0.985394	-3.25236	0.461092	FALSE
1	55482	55693	-5235	-1.91745	1	0.392953	0.990839	-2.47106	0.396382	FALSE
1	59538	59637	5380	-1.31407	1	-0.232591	0.996978	-0.723294	0.926378	FALSE
1	60523	60662	4355	-0.251887	1	-0.832295	0.956664	0.531167	0.921781	FALSE
1	79337	79397	-7234	-1.14544	1	-1.71054	1	-1.09496	0.926065	FALSE
1	79433	79670	-7330	-0.247913	1	-0.0172637	0.999328	-1.29643	0.73548	FALSE
1	84742	84835	-12639	-2.20782	1	2.27951	0.765685	0.388166	0.972958	FALSE
1	85896	86043	-13793	-2.65999	1	0.664934	0.982558	-0.337556	0.96735	FALSE
1	86090	86170	-13987	-3.68348	1	0.869128	1	-0.944239	0.913159	FALSE
1	86478	86545	-14375	-0.083577	1	0.306664	1	-0.904642	0.936299	FALSE
1	88904	88967	-16801	0.0838319	1	-0.52512	0.990839	-0.601314	0.941447	FALSE
1	90397	90429	-18294	-1.84674	1	1.11171	1	-0.952485	0.941177	FALSE
1	92625	92753	-17045	0.132925	1	0.0437103	0.998934	0.488142	0.940192	FALSE
1	93336	93475	-16323	-0.479545	1	-0.0609686	0.998725	0.420409	0.928611	FALSE
1	96106	96181	-13617	-0.435945	1	-1.99177	0.782843	-0.841803	0.90676	FALSE
1	99597	99934	-9864	0.707961	0.492887	0.348352	0.983797	-0.408528	0.908362	FALSE
1	114969	115020	-4165	0.214396	1	-0.30722	1	-0.656173	0.962146	FALSE
1	139597	139737	3579	-3.2318	1	-0.0394372	0.998975	0.0223346	0.998048	FALSE
1	161367	161409	3574	-1.85514	1	-1.97093	1	-2.08791	0.762131	FALSE
1	162216	162330	4423	1.99068	1	2.0367	0.775854	0.151085	0.989974	FALSE
1	162562	162665	4769	-1.1128	1	-4.51099	1	-3.14599	0.606135	FALSE
1	178339	178468	3315	-4.93875	1	0.804461	0.974451	-0.740925	0.91564	FALSE
1	184122	184206	9098	-1.08594	1	-1.58978	1	-1.27094	0.920294	FALSE
1	184560	184711	9536	-1.11677	1	-0.817905	1	-1.90616	0.747054	FALSE
1	202586	202626	3389	-0.351999	1	-0.265089	1	0.595767	0.962277	FALSE
1	252997	253116	3100	0.485025	1	0.375283	0.994104	-0.701756	0.932412	FALSE
1	256856	257008	6959	-1.18302	1	-0.874372	0.952454	-0.216192	0.976537	FALSE
1	291199	291282	-6084	-2.72124	1	-1.14172	1	-2.88897	0.653875	FALSE
1	300393	300540	3027	-1.39007	1	-0.518432	0.992942	-1.37458	0.842589	FALSE
1	300766	300846	3400	-0.386042	1	-5.31098	1	-0.519155	0.963236	FALSE
1	303680	303737	6314	0.489549	1	1.41079	1	-5.16407	0.312015	FALSE
1	310939	311108	13573	-2.02379	1	-0.322695	0.995656	0.00937465	0.999151	FALSE
1	314922	315330	17556	-3.8393	1	0.89214	0.877426	-0.417407	0.926666	FALSE
1	315509	315573	18143	-2.07943	1	-1.44515	1	-0.21904	0.9886	TRUE
1	320846	320976	22290	-5.13653	1	-1.85027	1	-1.24142	0.853536	FALSE
1	323488	323578	19688	-0.798754	1	-1.81979	1	-1.11891	0.893866	FALSE
1	325997	326099	17167	1.20263	1	0.500236	0.992942	0.477631	0.963041	FALSE
1	328277	328361	14905	-0.544546	1	2.09846	0.711099	-2.04427	0.733899	FALSE
1	328643	328750	14516	-2.64158	1	-0.524593	0.992942	-0.58847	0.951981	FALSE
1	328802	328894	14372	-1.81831	1	-0.669277	1	-0.167103	0.988179	FALSE
1	334229	334315	8951	-3.51932	1	0.347525	1	-0.902226	0.915317	FALSE
1	339330	339553	3713	-0.637383	1	-0.705468	0.980039	-1.06764	0.845724	FALSE
1	355076	355163	3773	-5.67118	1	-0.777555	1	-1.80364	0.753268	FALSE
1	362571	362676	-3584	-1.31874	1	-0.373884	0.994266	-2.07655	0.679474	FALSE
1	365187	365230	-6200	-1.93081	1	0.0100749	1	-0.850791	0.936047	FALSE
1	366518	366592	-7531	-0.446064	1	0.903495	1	-0.930158	0.924819	FALSE
1	371454	371500	-12467	-4.05779	1	-2.76252	1	-3.73019	0.541078	FALSE
1	384821	384981	-25834	-0.192363	1	0.479364	0.992942	-0.676003	0.93602	FALSE
1	389884	389946	26206	-0.294693	1	2.02752	0.759908	0.577762	0.947623	FALSE
1	393523	393572	22580	-3.62711	1	0.450318	1	-1.76797	0.772883	FALSE
1	404018	404152	12000	0.790717	1	2.24971	0.629418	1.52543	0.771168	FALSE
1	404525	404627	11525	-0.665029	1	-1.06708	0.969338	-0.76227	0.925428	FALSE
1	405465	405661	10491	0.734346	1	0.358081	0.990518	1.00615	0.756571	FALSE
1	412017	412167	3985	1.61191	1	0.415982	0.992942	0.203385	0.982074	FALSE
1	431717	431861	8027	1.01107	1	1.48677	0.854919	0.21495	0.981393	FALSE
1	433652	433737	9962	-5.34951	1	0.0301919	1	-2.0438	0.759334	FALSE
1	435724	435765	12034	-3.59374	1	0.762948	1	0.321634	0.980813	FALSE
1	436274	436328	12584	-1.40261	1	0.675636	1	0.398661	0.974715	FALSE
1	438482	438643	14792	-0.666496	1	1.17837	0.904346	-0.198471	0.981397	FALSE
1	446165	446306	16855	-2.15591	1	-0.293542	0.995888	0.200175	0.985932	FALSE
1	450827	451085	12076	0.315841	1	0.434373	0.990657	0.926409	0.853938	FALSE
1	451866	451942	11219	-4.30866	1	-3.36108	1	-5.03106	0.477132	FALSE
1	473305	473451	3295	-0.988983	1	0.988332	0.960845	-0.468439	0.954977	FALSE
1	481751	481785	-5005	-0.92926	1	-0.479387	1	-0.745633	0.957097	FALSE
1	514162	514254	4284	-1.0034	1	-4.98637	1	-1.02178	0.923097	FALSE
1	514607	514708	3830	-1.23074	1	-0.900911	1	-1.13716	0.898932	FALSE
1	514774	514818	3720	-4.15997	1	-4.61501	1	0.154512	0.993642	FALSE
1	523744	523909	4910	-1.36617	1	-1.00853	0.980394	-1.02272	0.912017	FALSE
1	548576	548709	6166	-0.451536	1	-0.433245	0.99338	-1.96513	0.710596	FALSE
1	553005	553116	10595	-4.77797	1	-1.17667	1	-2.5148	0.834937	FALSE
1	557185	557291	6604	-3.07952	1	0.0930394	1	-0.613098	0.945423	FALSE
1	572656	572735	-8530	-3.08878	1	0.147218	1	-1.04489	0.917259	FALSE
1	576704	576762	-4503	-1.43987	1	-0.328002	1	-0.559412	0.963806	FALSE
1	590883	591060	5374	-0.916477	1	-0.534649	0.992942	-0.805653	0.929456	FALSE
1	593065	593124	-6281	-4.205	1	0.894553	1	-1.188	0.921726	FALSE
1	596012	596086	-3319	-2.62	1	-0.279244	1	-0.413499	0.97652	FALSE
1	604804	605117	-3831	0.575069	0.639069	0.423043	0.980039	1.43499	0.408347	FALSE
1	612682	612904	3734	0.520798	1	1.04538	0.767726	-0.522084	0.892979	FALSE
1	649419	649519	-11242	-0.720724	1	0.934063	0.975944	-1.06115	0.890585	FALSE
1	649590	649645	-11413	-1.2637	1	0.0661764	0.998737	0.0237216	0.998094	FALSE
1	655852	656121	5399	-0.0693103	1	-0.619388	0.972591	0.273708	0.962636	FALSE
1	656670	656927	4593	-1.2503	1	-0.358432	0.987507	-0.416238	0.924434	FALSE
1	680202	680265	-5638	-2.48656	1	-0.737287	1	-2.18243	0.684055	FALSE
1	680351	680455	5568	-4.48609	1	0.238366	0.997881	-2.84702	0.561354	FALSE
1	694954	695029	-8931	-0.925467	1	-1.24355	1	-1.25477	0.89371	FALSE
1	695224	695300	-9201	0.647133	1	0.511216	0.992614	-0.146301	0.989637	FALSE
1	696100	696235	-10077	-0.624134	1	0.406739	0.992942	-1.98393	0.601047	FALSE
1	696500	696559	-10477	-3.59266	1	-0.175448	1	-0.591887	0.9664	FALSE
1	701312	701370	-15289	-3.1102	1	0.567457	1	-2.85937	0.707136	FALSE
1	702595	702748	-16572	-0.805923	1	1.65564	0.67515	-0.617226	0.919235	FALSE
1	704996	705066	14667	1.12752	1	1.67072	1	-4.39477	0.484898	FALSE
1	705110	705230	14503	-2.78777	1	1.73156	0.815502	-1.53574	0.813732	FALSE
1	724966	725014	-5233	-0.612413	1	-0.614816	1	-2.05208	0.819226	FALSE
1	728732	728778	-8999	-4.56497	1	-1.76004	1	-5.28738	0.560814	FALSE
1	730466	730546	-10733	-1.43794	1	-1.09303	1	-0.597166	0.9504	FALSE
1	733995	734408	-14262	0.393229	0.642862	-0.830357	0.66588	0.0334896	0.993516	FALSE
1	736379	736449	-16646	-0.124191	1	0.36589	0.99523	0.363383	0.976049	FALSE
1	739478	739583	-19745	-1.18924	1	1.81787	0.814436	0.256259	0.980813	FALSE
1	744351	744552	-24618	0.31036	1	-0.458731	0.990539	-1.34559	0.757758	FALSE
1	744653	744693	-24920	0.635556	1	0.999366	1	-4.43977	0.539002	FALSE
1	750611	750794	-30878	-0.487114	1	0.904057	0.941698	-0.805994	0.874814	FALSE
1	751914	752097	-32181	-0.464027	1	-2.24217	0.602996	-1.91023	0.603784	FALSE
1	758139	758225	-38406	-0.249675	1	-1.66888	1	-0.566756	0.956392	FALSE
1	759916	760008	-40183	0.0100924	1	1.62223	0.943685	-2.48727	0.740079	FALSE
1	762413	762538	-42680	0.815173	1	0.796712	0.982643	0.416938	0.965286	FALSE
1	765055	765292	-45322	1.16763	1	-0.0342836	0.999132	-0.170838	0.983612	FALSE
1	768048	768142	-48315	0.631079	1	-0.313858	0.994985	-1.47116	0.813871	FALSE
1	770417	770661	-50684	0.418597	0.641867	-0.469051	0.947107	0.0206393	0.996696	FALSE
1	776675	776770	-56942	-4.07252	1	1.15609	0.971045	-2.83384	0.599303	FALSE
1	795808	796111	-76075	0.223885	1	1.37656	0.812074	-0.335942	0.961335	FALSE
1	802163	802490	-82430	0.293473	0.659867	-0.133169	0.992942	0.849257	0.358768	FALSE
1	810646	810910	-90913	-0.796365	1	-1.47302	0.548061	-0.504428	0.900226	FALSE
1	814674	814965	-94941	0.147259	1	0.491024	0.9799	-0.228334	0.967201	FALSE
1	816029	816124	-96296	1.37592	1	1.11681	0.969027	-0.996971	0.909059	FALSE
1	818221	818397	-98488	-3.16988	1	-1.88056	0.877765	0.270645	0.980819	FALSE
1	818505	818616	-98772	-1.62078	1	0.787697	0.979928	-2.31127	0.61857	FALSE
1	818666	818861	-98933	1.01006	1	0.636689	0.976424	0.038574	0.996755	FALSE
1	822312	822389	-102579	1.25427	1	1.55568	0.750567	0.430687	0.948294	FALSE
1	824470	824544	-104737	0.403826	1	-5.30478	1	-0.536445	0.955954	FALSE
1	826396	826759	-106663	0.383011	1	-0.781152	0.904118	0.310628	0.941289	FALSE
1	826808	827027	-107075	-0.981884	1	-2.81408	0.61232	-0.543479	0.953685	FALSE
1	843968	844349	-122037	0.65213	0.575914	0.39282	0.982558	0.647874	0.836569	FALSE
1	846987	847160	-119226	2.05674	0.0126279	0.338204	0.985272	1.96957	0.0948535	FALSE
1	848838	849124	-117262	-1.48184	1	-0.869109	0.931545	0.139836	0.982877	FALSE
1	852391	852608	-113778	-0.233972	1	1.02103	0.843357	0.382337	0.936618	FALSE
1	854210	854452	-111934	0.542653	0.453574	-0.107846	0.99487	0.659738	0.657964	FALSE
1	864504	865070	-101316	-1.93527	0.0100597	-0.935069	0.542283	-0.380758	0.874541	FALSE
1	865104	865205	-101181	0.904905	1	0.279419	0.994877	0.58308	0.93463	FALSE
1	874057	874225	-92161	-1.91921	1	0.527568	0.987493	-0.206925	0.980813	FALSE
1	874300	874377	-92009	-0.900243	1	0.363141	1	-1.27219	0.893531	FALSE
1	877733	877882	-88504	0.591498	1	-1.28104	0.954836	1.06436	0.868864	FALSE
1	880202	880308	-86078	-0.839317	1	0.257967	1	-1.93772	0.818357	FALSE
1	885091	885279	-81107	-2.97621	1	-0.281452	0.993891	-0.531402	0.92217	FALSE
1	885899	886050	-80336	-0.0170004	1	-5.59584	0.135502	-0.735953	0.92217	FALSE
1	891305	891359	-75027	-4.82221	1	-1.65448	1	-1.82548	0.883859	FALSE
1	892106	892261	-74125	0.297596	1	-1.3779	0.898746	-1.28814	0.808002	FALSE
1	898747	898827	-67559	-0.237309	1	-0.315191	0.995859	-0.652652	0.947443	FALSE
1	901224	901267	-65119	-5.17456	1	-0.12621	1	-1.1317	0.898029	FALSE
1	904836	905152	-61234	-0.521716	0.700382	0.327745	0.987507	-0.256553	0.955556	FALSE
1	906402	906473	-59913	-0.178513	1	-5.50678	1	-0.680216	0.957388	FALSE
1	908699	908773	-57613	-3.73377	1	0.44237	1	-2.15417	0.717104	FALSE
1	916057	916101	-50285	0.94273	1	-0.642782	1	-1.05369	0.927958	FALSE
1	919436	919487	-46899	-4.62443	1	-1.14017	1	-1.28931	0.9084	FALSE
1	922104	922191	-44195	0.746318	1	1.55229	1	-4.09612	0.542761	FALSE
1	924733	924828	-41558	-1.57549	1	-6.08654	1	-0.272434	0.978505	FALSE
1	931599	931795	-34591	-1.09058	1	0.686391	0.974231	-0.424891	0.946998	FALSE
1	931857	931922	-34464	-1.95023	1	0.795988	1	-1.13636	0.889851	FALSE
1	939803	939948	-26438	-0.829239	1	0.232137	0.995827	-0.221025	0.97967	FALSE
1	941978	942148	-24238	-1.55364	1	-1.25909	0.946862	-0.782063	0.92045	FALSE
1	945960	946110	-20276	0.253862	1	0.352233	0.995888	-0.528619	0.966212	FALSE
1	975484	975592	9098	-0.779681	1	-5.65555	1	-1.35546	0.882	FALSE
1	981207	981314	14821	-2.40189	1	-0.344142	1	-1.00165	0.907034	FALSE
1	989286	989399	22900	-0.00810978	1	0.401993	0.994621	-1.8704	0.800834	FALSE
1	989442	989516	23056	0.583924	1	2.06998	0.852883	0.331087	0.978876	FALSE
1	991097	991161	24711	-0.255834	1	1.71715	1	1.57091	0.879145	FALSE
1	992708	992757	26322	0.374567	1	-0.224248	1	-0.418767	0.978466	FALSE
1	999828	1000087	33442	0.251847	1	0.313854	0.99346	-0.416867	0.949046	FALSE
1	1002178	1002255	35792	0.165666	1	-0.504974	1	-4.58271	0.485074	FALSE
1	1002838	1002992	36452	-4.52678	1	-0.322744	0.994342	-1.08123	0.86226	FALSE
1	1009972	1010255	43586	-2.60998	1	-0.320063	0.992942	-0.663334	0.900892	FALSE
1	1012975	1013048	46589	-4.7959	1	-5.25093	1	-0.64601	0.957736	FALSE
1	1020486	1020566	54100	-4.55391	1	0.488038	1	0.102284	0.99382	FALSE
1	1026026	1026105	59640	0.555859	1	-5.58522	1	-0.00992778	0.999136	FALSE
1	1028553	1028747	62167	-1.1205	1	-0.420378	0.992942	-0.739873	0.917271	FALSE
1	1031572	1031637	65186	-2.4985	1	-5.46979	1	-1.49301	0.891706	FALSE
1	1033352	1033498	66966	-0.749046	1	-1.41097	0.938361	-1.2533	0.861605	FALSE
1	1039373	1039462	72987	0.361228	1	0.926552	0.974451	-5.54188	0.240477	FALSE
1	1044370	1044439	77984	-0.35169	1	-0.188615	1	-0.113884	0.993652	FALSE
1	1051528	1051666	85142	-1.23377	1	-0.974754	1	-6.30027	0.221858	FALSE
1	1053714	1053963	87328	-0.271826	1	0.441085	0.992942	-0.212071	0.982873	FALSE
1	1056073	1056137	89687	0.189336	1	0.915775	1	0.500111	0.95767	FALSE
1	1058313	1058367	91927	1.17568	1	-4.7123	1	-0.747902	0.950846	FALSE
1	1058430	1058490	92044	0.406663	1	0.319957	1	-0.760528	0.941385	FALSE
1	1069238	1069402	102852	-0.0656096	1	-0.294224	0.997023	-0.882914	0.931583	FALSE
1	1072740	1072812	106354	-1.65185	1	0.0707687	1	-0.0685565	0.996664	FALSE
1	1072897	1072941	106511	-0.487015	1	-4.80636	1	-3.64092	0.689246	FALSE
1	1077208	1077315	110822	-0.757224	1	-0.146041	0.998725	-1.03493	0.894784	FALSE
1	1089460	1089802	114554	-0.803205	1	-3.83945	0.103328	-0.337794	0.95515	FALSE
1	1094351	1094422	109934	-2.43768	1	-5.39557	1	0.165742	0.99042	FALSE
1	1110130	1110206	94150	-4.43578	1	-1.26383	1	-2.08808	0.874541	FALSE
1	1111099	1111289	93067	0.036551	1	0.207953	0.99668	-1.37957	0.782261	FALSE
1	1115252	1115409	88947	0.512932	1	0.0341351	0.999253	-1.16877	0.831716	FALSE
1	1120055	1120195	84161	-3.85311	1	-0.437021	1	-0.582595	0.954475	FALSE
1	1123163	1123415	80941	-1.47198	1	0.374125	0.990539	-1.27321	0.700429	FALSE
1	1129258	1129303	75053	-3.51416	1	-2.46443	1	-0.163086	0.993324	FALSE
1	1140626	1140713	63643	-1.03245	1	-0.658316	1	-1.78298	0.725665	FALSE
1	1161598	1161941	42415	-1.75739	1	-1.03019	0.858325	-0.770163	0.83672	FALSE
1	1164105	1164375	39981	0.335992	1	1.26356	0.867262	0.0768207	0.993352	FALSE
1	1171182	1171379	32977	-0.350997	1	-1.41905	0.852883	-1.1026	0.820347	FALSE
1	1177090	1177314	27042	-0.77154	1	-0.431304	0.992942	-0.475737	0.956448	FALSE
1	1180028	1180089	24267	-0.117637	1	0.986412	1	-3.74595	0.646344	FALSE
1	1193203	1193293	11063	-1.47535	1	0.922502	0.971308	0.644035	0.932327	FALSE
1	1193859	1193937	10419	-1.03909	1	-0.621532	1	-0.0917692	0.994779	FALSE
1	1207965	1208039	-3609	-4.40398	1	0.673293	1	-5.12639	0.41925	FALSE
1	1215891	1216007	-8944	-3.31974	1	-3.71607	1	-1.42473	0.874926	FALSE
1	1230342	1230457	5391	-0.365034	1	0.0985064	1	-2.06213	0.746999	FALSE
1	1239036	1239132	14085	-3.38386	1	0.429994	0.99402	-0.256523	0.982074	FALSE
1	1245940	1246120	7841	-0.898364	1	0.126736	0.998627	0.0903776	0.991772	FALSE
1	1263300	1263415	-9339	-0.900328	1	0.78598	0.983912	-1.55195	0.821678	FALSE
1	1266853	1267041	-12892	-0.415855	1	-0.208988	0.996115	-1.64181	0.688992	FALSE
1	1272813	1272875	-18852	-0.842833	1	-4.41323	1	-1.21664	0.925264	FALSE
1	1275445	1275485	-21484	-1.23633	1	0.361999	1	-0.933764	0.934299	FALSE
1	1276961	1277149	-23000	0.250566	1	1.36126	0.848112	0.134006	0.98812	FALSE
1	1279009	1279085	-25048	-1.93912	1	-1.16383	1	0.116893	0.993433	FALSE
1	1307503	1307600	-53542	0.758621	1	-5.00813	1	-0.676336	0.942869	FALSE
1	1307703	1307948	-53742	-0.72583	1	-1.03318	0.902106	-1.01924	0.793484	FALSE
1	1320497	1320934	-66536	0.129826	0.908932	0.221672	0.990657	0.773136	0.653798	FALSE
1	1327051	1327116	-73090	0.529409	1	1.02553	1	0.156325	0.990856	FALSE
1	1327207	1327262	-73246	-0.364609	1	-4.21712	1	-1.49588	0.908549	FALSE
1	1327306	1327375	-73345	-0.390065	1	-0.400178	1	-1.47158	0.883187	FALSE
1	1329863	1330103	-75902	-2.17286	1	-0.342583	0.994104	-0.928737	0.880779	FALSE
1	1338627	1338841	-84666	0.511937	1	-1.26946	0.871241	0.659282	0.889858	FALSE
1	1340665	1340793	-86704	-0.808213	1	-2.92859	0.631773	-0.979903	0.908216	FALSE
1	1344448	1344675	-83116	-1.1519	1	-1.02332	0.94832	-2.08555	0.544664	FALSE
1	1344774	1344874	-82917	-3.50616	1	-5.4232	1	-1.07258	0.90065	FALSE
1	1353237	1353332	-74459	0.754177	1	-0.339045	0.993631	0.34469	0.962146	FALSE
1	1353441	1353493	-74298	-0.661821	1	0.588959	1	-1.69019	0.851764	FALSE
1	1357141	1357208	-70583	-0.290956	1	0.947728	1	0.199898	0.989955	FALSE
1	1359457	1359573	-68218	-0.510151	1	1.02829	0.969289	-0.455294	0.962514	FALSE
1	1365950	1366007	-61784	-1.62514	1	-1.19617	1	-3.76646	0.70728	FALSE
1	1373359	1373455	-54336	-1.20974	1	0.571554	1	-0.991617	0.927214	FALSE
1	1376482	1376579	-51212	-3.86248	1	-2.00302	1	-0.512402	0.973696	FALSE
1	1376740	1376877	-50914	0.399064	1	1.18191	0.691195	0.643909	0.854307	FALSE
1	1386288	1386543	-41248	-1.69378	1	-0.382528	0.990839	-1.0387	0.807498	FALSE
1	1389256	1389396	-38395	0.0886888	1	-3.60396	0.136033	0.0752656	0.992643	FALSE
1	1389946	1390163	-37628	1.31766	0.0703367	0.254764	0.987703	2.21375	0.00276381	FALSE
1	1397215	1397408	-30383	-0.859024	0.505027	-0.519872	0.974451	0.249536	0.959531	FALSE
1	1397620	1397720	-30071	-3.64559	1	-0.408908	1	-2.09205	0.772592	FALSE
1	1407569	1407668	-20123	-1.72365	1	0.413013	1	-0.877931	0.922152	FALSE
1	1410381	1410481	-17310	-1.36179	1	2.43024	0.642433	1.71248	0.75968	FALSE
1	1417216	1417415	-10376	-2.59323	1	-0.686534	0.986285	-0.630204	0.939453	FALSE
1	1420936	1421182	-6609	-0.961867	1	-0.302192	0.993082	-1.41624	0.676263	FALSE
1	1433109	1433205	5318	-3.24551	1	-5.12597	1	0.117452	0.993359	FALSE
1	1437823	1437967	10032	0.615029	1	0.712721	0.984845	-1.14767	0.869296	FALSE
1	1438692	1438766	10901	-0.693522	1	-5.29983	1	-1.31019	0.898598	FALSE
1	1441823	1442060	-10227	-2.13074	1	0.641536	0.983633	-1.86253	0.650397	FALSE
1	1444640	1444721	-7566	-1.6634	1	0.66007	0.986339	-2.17367	0.646283	FALSE
1	1456890	1457031	4603	-0.677201	1	0.780831	0.968883	-0.243684	0.974939	FALSE
1	1459447	1459556	7160	-2.29944	1	-5.80696	1	-3.6581	0.50009	FALSE
1	1473357	1473528	6267	0.602704	1	0.231177	0.998273	-3.52855	0.496008	FALSE
1	1485911	1486031	-6116	-1.13799	1	-1.26623	0.950223	-0.140513	0.990105	FALSE
1	1487730	1487945	-7935	-0.00563783	0.996009	-0.322491	0.97437	0.650368	0.676025	FALSE
1	1491631	1491765	-11836	-1.05691	1	-0.354212	0.992403	-0.268267	0.966907	FALSE
1	1493443	1493507	-13648	-1.26171	1	-5.58038	1	-1.08234	0.929579	FALSE
1	1497878	1498135	-18083	0.518782	1	0.399694	0.992614	0.13781	0.987501	FALSE
1	1504676	1504903	-24881	-0.491467	1	-5.15408	0.196078	-1.96171	0.674806	FALSE
1	1506589	1506924	-26794	0.529062	1	0.715846	0.951532	-0.727929	0.861019	FALSE
1	1507193	1507262	-27398	-2.63412	1	-5.59801	1	-3.39338	0.59563	FALSE
1	1511770	1511856	-30116	-2.34713	1	0.0554218	1	-0.83808	0.929987	FALSE
1	1514575	1515035	-26937	0.506143	0.650829	0.434817	0.974441	0.127028	0.978553	FALSE
1	1516875	1517102	-24870	-0.564929	1	0.145743	0.998617	-0.799956	0.903603	TRUE
1	1527230	1527350	-14622	-1.77745	1	-4.67438	1	0.405432	0.970648	FALSE
1	1527457	1527513	-14459	-2.29489	1	-5.27595	1	-5.54332	0.463101	FALSE
1	1531264	1531420	-10552	-1.49247	1	-0.263792	0.995624	0.0614769	0.995588	FALSE
1	1536121	1536359	-5613	-0.716281	1	-3.6216	0.156023	-0.760286	0.885697	FALSE
1	1561157	1561289	-3019	1.32912	0.13986	-1.29701	0.549197	0.446869	0.896343	FALSE
1	1574974	1575054	3561	0.74162	1	-4.95182	1	-0.500925	0.968844	FALSE
1	1575590	1575634	4177	-4.95039	1	-0.227636	1	-1.91564	0.810647	FALSE
1	1587782	1587838	5184	-0.172374	1	-0.140514	1	-0.458662	0.971193	FALSE
1	1588154	1588402	5556	0.481585	0.722494	-0.72226	0.938361	1.65076	0.351571	FALSE
1	1591274	1591376	8676	0.698806	1	0.573115	0.988425	0.961066	0.881183	FALSE
1	1597965	1598074	15367	1.14293	1	0.702029	0.981544	1.37811	0.76017	FALSE
1	1606873	1606958	24275	0.704104	1	1.48421	0.784103	0.352699	0.959363	FALSE
1	1608509	1608620	25911	0.566663	1	-0.81308	0.971045	0.349078	0.961013	FALSE
1	1616076	1616200	-25363	-4.88733	1	1.40614	0.918132	-1.87834	0.74786	FALSE
1	1618137	1618455	-23108	0.644418	0.493245	-0.414446	0.972591	-0.622035	0.808083	FALSE
1	1620759	1620881	-20682	-0.410908	1	0.213212	0.99776	-1.33806	0.83672	FALSE
1	1621046	1621120	-20443	-0.0644375	1	0.0565496	0.998934	-1.21742	0.863803	FALSE
1	1621377	1621516	-20047	-0.57408	1	-5.87314	0.118781	-0.542698	0.949154	FALSE
1	1624556	1624803	-16760	1.42306	0.0868475	0.126939	0.995656	1.57152	0.245106	FALSE
1	1627453	1627519	-14044	1.41753	1	0.999879	1	-1.19781	0.899995	FALSE
1	1648320	1648433	5342	-4.80534	1	0.397898	1	-0.303068	0.977621	FALSE
1	1648886	1648967	5908	-0.870109	1	0.745474	1	-1.12017	0.902928	FALSE
1	1649286	1649514	6308	-0.466224	1	-1.77932	0.813466	-1.40392	0.793529	FALSE
1	1653475	1653608	-3892	-0.0610183	1	-0.217761	0.998021	1.35568	0.831381	FALSE
1	1672676	1672749	15176	-3.25516	1	-5.13497	1	-0.0681744	0.996696	FALSE
1	1672813	1672899	15313	-3.52236	1	-5.44061	1	0.057463	0.997048	FALSE
1	1675025	1675099	-15271	-1.93263	1	1.6892	0.919724	0.488466	0.965692	FALSE
1	1679884	1679985	-10385	2.1962	1	-1.34111	0.936569	0.569267	0.939582	FALSE
1	1682292	1682346	-8024	-2.75595	1	0.0747261	1	-0.870263	0.950579	FALSE
1	1682381	1682574	-7796	-0.0676254	1	-1.93243	0.722642	-2.33435	0.491401	FALSE
1	1687114	1687208	-3162	-0.983291	1	0.148555	1	-1.3047	0.879586	FALSE
1	1701459	1701616	11089	0.632403	1	-1.11191	0.835942	0.750261	0.836525	FALSE
1	1760853	1760928	4228	-4.84929	1	-2.99844	1	-2.58331	0.793518	FALSE
1	1763978	1764015	-4115	-2.19132	1	0.384485	1	-1.64198	0.839788	FALSE
1	1776973	1777039	3214	-2.9815	1	-3.43654	1	1.61055	0.851978	FALSE
1	1804178	1804248	10941	1.3646	1	1.59544	1	-0.808311	0.942399	FALSE
1	1809550	1809667	16313	-0.125274	1	0.00138152	1	-1.55149	0.798658	FALSE
1	1809707	1809831	16470	-3.02027	1	-1.19543	1	-1.55823	0.839276	FALSE
1	1820358	1820438	27121	-0.448732	1	0.30028	1	-4.08449	0.540073	FALSE
1	1823017	1823190	29780	-2.62814	1	1.1817	0.926585	0.85751	0.889932	FALSE
1	1830256	1830329	37019	-1.04648	1	1.40022	0.940069	-4.17978	0.478821	FALSE
1	1834848	1834942	41611	-3.51874	1	2.78497	1	-2.80505	0.734165	FALSE
1	1844063	1844134	-33157	-1.48143	1	-3.28089	1	-1.43882	0.866074	FALSE
1	1857154	1857231	-20060	-1.54532	1	-1.15516	1	-1.15964	0.910338	FALSE
1	1859633	1859700	-17591	-3.97409	1	-2.59604	1	-2.12052	0.759298	FALSE
1	1865738	1865863	-11428	-0.651107	1	0.704273	0.982453	0.105178	0.991976	FALSE
1	1868912	1868989	-8302	-1.82721	1	-1.52559	1	-1.65471	0.851764	FALSE
1	1869363	1869517	-7774	0.125016	1	0.246058	0.996698	0.420627	0.963752	FALSE
1	1885683	1885834	8392	-0.0077388	1	0.263139	0.994104	0.936175	0.808241	FALSE
1	1900464	1900586	3219	-4.17357	1	-0.420332	1	-3.33452	0.4197	FALSE
1	1907304	1907414	-3499	-0.962312	1	-2.1427	0.814421	-0.424835	0.964779	FALSE
1	1908266	1908465	-4461	-0.878647	1	-0.749923	0.977324	0.165583	0.985422	FALSE
1	1932611	1932680	-4876	-0.0351088	1	0.424988	1	-1.09014	0.875973	TRUE
1	1935327	1935418	-7592	-0.229922	1	-4.83313	1	-0.450482	0.976381	FALSE
1	1939357	1939488	-11622	-2.96032	1	-1.12014	1	-6.63132	0.215613	FALSE
1	1945897	1945995	-7752	0.0917875	1	0.443918	0.992942	-2.60912	0.519976	FALSE
1	1946115	1946288	-7459	-1.13404	1	-0.107473	0.998725	-3.94311	0.320747	FALSE
1	1948269	1948427	-5320	0.774269	1	-0.508112	0.992754	0.840869	0.911679	FALSE
1	1948514	1948721	-5026	1.16897	0.415351	1.20916	0.828071	1.76695	0.459776	FALSE
1	1961562	1961800	-3132	0.530372	0.583702	-0.934083	0.725613	-0.16039	0.967804	FALSE
1	1970913	1971043	5954	-3.58418	1	-0.414209	1	-0.520884	0.955386	FALSE
1	1971150	1971371	6191	-1.96753	1	-1.99939	0.785931	-2.96193	0.429613	FALSE
1	1973166	1973324	-7852	-1.57798	1	0.518346	0.990657	-2.09653	0.635511	FALSE
1	1991025	1991282	9644	1.0083	0.281047	0.213022	0.992942	-0.193443	0.964408	FALSE
1	1993725	1994133	12344	0.912938	0.049497	0.0773069	0.995212	1.05351	0.106506	FALSE
1	1995853	1996091	14472	0.0546807	0.970449	-0.627306	0.935795	0.125988	0.978609	FALSE
1	1997300	1997497	15919	0.412455	1	-2.02797	0.350952	0.0380708	0.996066	FALSE
1	2001464	2001596	20083	0.173387	1	-0.615252	0.985307	0.00861458	0.999084	FALSE
1	2001723	2001783	20342	-3.81983	1	0.921189	1	0.222964	0.985895	FALSE
1	2004622	2004738	23241	1.75255	1	0.533148	0.992809	-2.49463	0.696386	FALSE
1	2007321	2007436	25940	-1.55208	1	-0.0132964	1	-2.2203	0.660184	FALSE
1	2007481	2007588	26100	0.355924	1	0.561486	1	-1.0086	0.908359	FALSE
1	2010753	2010996	29372	-6.59399	1	-1.59085	0.810651	-2.56645	0.399371	FALSE
1	2016127	2016187	-26719	2.12154	1	1.47109	1	1.17744	0.885193	FALSE
1	2019391	2019615	-23291	-3.71758	1	-1.48775	0.900283	-0.902866	0.898408	FALSE
1	2019657	2019798	-23108	-0.775617	1	-1.44595	0.937344	0.140547	0.99042	FALSE
1	2022271	2022530	-20376	-1.22068	1	0.00123483	0.999921	-0.313938	0.953948	FALSE
1	2027647	2027715	-15191	-0.315316	1	1.78142	0.934128	0.817034	0.942849	FALSE
1	2030921	2031101	-11805	-1.07807	1	-0.587978	0.989793	-0.0464017	0.997149	FALSE
1	2033344	2033610	-9296	0.234662	1	0.694713	0.975895	-0.0216134	0.997973	FALSE
1	2036175	2036392	-6514	-0.607737	1	-0.981254	0.906794	-1.00478	0.78903	FALSE
1	2055587	2055660	12667	-0.00402086	1	1.21701	0.895094	-0.0491111	0.996369	FALSE
1	2055769	2056024	12849	0.00181633	1	0.655161	0.959122	-0.125674	0.98423	FALSE
1	2057877	2058009	14957	0.742184	1	0.283108	0.992942	0.337884	0.953921	TRUE
1	2058363	2058744	15443	-0.165346	0.903122	-1.24722	0.571452	-0.203552	0.962676	FALSE
1	2087929	2088061	13360	-0.175988	1	-2.72954	0.522038	-0.303512	0.971825	FALSE
1	2089172	2089276	14603	-0.43223	1	-0.703834	1	-0.058461	0.996867	FALSE
1	2102830	2103251	-9362	0.416938	0.548554	-0.402668	0.938787	0.332012	0.874126	FALSE
1	2105113	2105240	-7373	0.939337	1	-0.337752	0.994621	-0.593928	0.943509	FALSE
1	2119925	2120008	-4459	0.625173	1	-0.377883	0.994676	1.11701	0.888434	FALSE
1	2120798	2120870	-3597	-1.89757	1	0.238425	0.995888	0.52237	0.945721	FALSE
1	2131211	2131351	3400	-4.40059	1	-6.31779	1	-2.12096	0.711387	FALSE
1	2132874	2133128	5063	-3.13178	1	-1.23082	0.910321	-3.1809	0.310353	FALSE
1	2135781	2135985	-3070	-0.347856	1	-3.80375	0.419184	-3.19847	0.476318	FALSE
1	2157916	2158109	3736	-0.0661839	1	-0.700439	0.971045	0.563357	0.913677	FALSE
1	2160225	2160292	6045	-0.636406	1	-0.634167	0.988093	0.488722	0.954853	FALSE
1	2160337	2160734	6157	0.6208	0.446741	1.14812	0.301036	1.16097	0.341737	FALSE
1	2162286	2162461	8106	1.27931	1	0.385606	0.990839	-0.140733	0.985932	FALSE
1	2162611	2162720	8431	-0.0360663	1	-0.619656	0.985394	-0.250401	0.977307	FALSE
1	2164992	2165205	10812	0.723102	1	-0.283304	0.990518	0.303376	0.939157	FALSE
1	2170623	2170858	15602	-0.06508	1	-0.741286	0.96678	0.664115	0.890484	FALSE
1	2173600	2173693	12767	-3.15932	1	0.924059	1	-0.729989	0.930855	FALSE
1	2175768	2176347	10113	0.759749	0.425476	-0.451926	0.971453	-0.381949	0.911159	FALSE
1	2179118	2179204	7256	1.61298	1	0.4985	1	0.554847	0.964172	FALSE
1	2216346	2216626	-29886	1.46877	1	0.169965	0.994877	0.235341	0.961552	FALSE
1	2218356	2218475	-31896	0.31801	1	-2.98145	0.339195	1.3207	0.714566	FALSE
1	2218599	2218689	-32139	-2.88751	1	0.923331	1	-0.645108	0.945088	FALSE
1	2221205	2221520	-33789	0.617541	0.511969	-0.733888	0.8636	-0.169051	0.966056	FALSE
1	2234086	2234209	-21100	-5.63036	1	-0.709681	0.983121	0.579265	0.938174	FALSE
1	2237939	2237990	-17319	-1.13782	1	-0.0603757	1	-0.846873	0.909377	FALSE
1	2245034	2245068	-10241	-4.36373	1	-2.51242	1	-2.09764	0.8517	FALSE
1	2246869	2246922	-8387	-0.224744	1	-0.175934	1	-0.423561	0.976039	FALSE
1	2260398	2260510	5089	0.799727	1	-0.031476	0.999325	-2.5756	0.684579	FALSE
1	2260924	2261159	5615	-3.29942	1	0.539429	0.985753	-1.58997	0.687141	FALSE
1	2263522	2263557	8213	2.29591	1	-4.04756	1	-0.911754	0.944667	FALSE
1	2268876	2268943	13567	-1.24398	1	-0.756932	1	-0.00745839	0.999494	FALSE
1	2268978	2269085	13669	-2.59647	1	-5.56435	1	-1.54901	0.877598	FALSE
1	2271336	2271445	16027	0.92058	1	-0.980282	0.92336	1.09219	0.749394	FALSE
1	2272409	2272702	17100	-0.799094	1	-0.264441	0.994266	-1.2986	0.724851	FALSE
1	2276447	2276575	21138	0.967061	1	-1.04371	0.971894	0.1672	0.9883	FALSE
1	2278015	2278225	22706	0.431802	1	0.0737135	0.998725	0.00937027	0.998793	FALSE
1	2281776	2281846	19755	-0.725811	1	-2.2668	1	0.36975	0.971466	FALSE
1	2286549	2286687	14914	-0.602618	1	-2.93893	0.566501	-2.38785	0.608615	FALSE
1	2292483	2292579	9022	-4.50699	1	-4.96203	1	-3.77261	0.650935	FALSE
1	2319988	2320028	-10236	0.895634	1	-1.07395	1	-5.01827	0.390605	FALSE
1	2320111	2320242	-10359	-0.270252	1	0.280327	0.995142	-3.63017	0.391143	FALSE
1	2329256	2329335	-19504	-2.64557	1	0.108749	1	-1.347	0.905009	FALSE
1	2333632	2333857	-23880	0.143572	1	-0.538713	0.985558	-1.58247	0.669866	FALSE
1	2336361	2336467	-26609	-1.37524	1	-0.138451	0.998617	-1.91367	0.570274	FALSE
1	2340801	2340860	-31049	0.261224	1	-3.72521	1	0.473503	0.97422	FALSE
1	2340943	2341035	-31191	-4.69198	1	0.650632	1	-1.93293	0.829264	FALSE
1	2341354	2341617	-31602	-2.6913	1	0.13409	0.998273	-1.76508	0.490909	FALSE
1	2344278	2344401	-34526	1.91809	1	-4.11876	0.482089	0.378928	0.969393	FALSE
1	2350422	2350526	-40670	-1.59003	1	-1.56855	1	0.153736	0.993299	FALSE
1	2354721	2354892	-44969	-3.10689	1	-0.931357	0.981628	-3.88917	0.391272	FALSE
1	2367143	2367234	-57391	0.847864	1	-0.115955	0.998725	-0.331906	0.977663	FALSE
1	2377029	2377089	-67277	-1.29466	1	0.959091	1	0.729958	0.957952	FALSE
1	2387091	2387356	-77339	0.363831	1	0.177714	0.995888	-0.0280608	0.997459	FALSE
1	2393647	2393798	-83895	-1.49034	1	0.136119	0.998725	-2.26295	0.574513	FALSE
1	2395800	2395878	-86048	-0.906244	1	-2.13541	1	-2.81664	0.577432	FALSE
1	2397509	2397734	-87757	-0.423523	1	-0.0676552	0.998725	-1.38033	0.737126	FALSE
1	2402256	2402395	-92504	-3.4495	1	-1.6112	1	-2.93311	0.57607	FALSE
1	2403076	2403269	-93324	-2.56885	1	0.14545	0.998725	-0.596439	0.946544	FALSE
1	2404922	2405059	-95170	0.749327	1	0.204996	0.99668	0.49331	0.943225	FALSE
1	2420884	2420928	-111132	-4.16035	1	1.1236	1	-0.0299838	0.998397	FALSE
1	2432331	2432499	-122579	-2.19314	1	-1.16869	1	-2.0684	0.778575	FALSE
1	2441976	2442151	-123011	0.619214	1	0.0381486	0.998725	0.141372	0.977269	FALSE
1	2450387	2450448	-114714	-4.24854	1	-0.75369	1	-0.319711	0.986094	FALSE
1	2450586	2450836	-114326	-0.454889	1	0.419732	0.990539	-0.603905	0.916879	FALSE
1	2470237	2470387	-94775	1.28731	1	0.379903	0.987493	0.920879	0.773708	FALSE
1	2478435	2478517	-86645	-0.230859	1	0.443813	1	-0.121205	0.993619	FALSE
1	2481271	2481324	-83838	-5.00871	1	-3.95475	1	-1.33648	0.916246	FALSE
1	2481453	2481533	-83629	0.769148	1	1.42534	0.940953	-1.83123	0.794465	FALSE
1	2485190	2485477	-79685	-1.16546	1	0.0677464	0.998725	-1.08664	0.821678	FALSE
1	2490142	2490235	-74927	0.408577	1	-1.36841	1	0.214524	0.9883	FALSE
1	2494373	2494445	-70717	-1.56338	1	-0.0361626	1	-1.2236	0.902016	FALSE
1	2503117	2503166	-61996	-1.87528	1	0.607738	1	0.402517	0.97263	TRUE
1	2505816	2505921	-59241	-3.7996	1	-5.72008	1	-1.55511	0.849657	FALSE
1	2513459	2513602	-51560	-0.645825	1	-6.06911	1	-1.92453	0.748089	FALSE
1	2519326	2519384	-45778	-1.5144	1	-0.462579	1	-2.25731	0.769086	FALSE
1	2527980	2528212	-36950	-0.647607	1	1.14867	0.934053	-0.643407	0.927909	FALSE
1	2530295	2530408	-34754	-3.94498	1	-0.112668	1	-1.88394	0.767538	FALSE
1	2530441	2530569	-34593	-5.37257	1	0.360201	1	-3.09675	0.53055	FALSE
1	2533972	2534010	-31152	-4.11057	1	1.98146	1	-0.847526	0.942745	FALSE
1	2549650	2549793	-15369	-0.918529	1	0.238252	0.997393	-1.34129	0.853624	FALSE
1	2557214	2557276	-7886	-3.97723	1	-2.92408	1	-2.22209	0.849764	FALSE
1	2600285	2600363	-33804	-1.5375	1	-0.105909	1	0.817153	0.927909	FALSE
1	2601870	2601985	-35389	-2.57519	1	-6.03254	1	-2.2429	0.777349	FALSE
1	2604160	2604307	-37679	1.02068	1	-0.101192	0.998725	-3.29798	0.53055	FALSE
1	2604371	2604433	-37890	-0.530078	1	0.0611591	1	-3.13424	0.652296	FALSE
1	2607369	2607712	-40888	0.842707	0.389976	0.421028	0.975479	-0.611939	0.838592	FALSE
1	2613877	2614065	-47396	-2.24526	1	-2.08169	1	-3.46245	0.49729	FALSE
1	2616076	2616547	-49595	-0.360913	1	-0.638973	0.969175	-0.252099	0.964779	FALSE
1	2624002	2624107	-49884	-5.04505	1	-5.50008	1	-0.567645	0.968833	FALSE
1	2625882	2626221	-47770	-3.38981	1	-1.52164	0.84505	-0.938283	0.871921	FALSE
1	2630009	2630064	-43927	-5.15362	1	-5.60866	1	-1.59041	0.911503	FALSE
1	2631405	2631487	-42504	-1.0699	1	0.585251	1	-1.50758	0.848707	FALSE
1	2637742	2637844	-36147	0.805012	1	-1.90333	0.867948	-4.82894	0.368479	FALSE
1	2637941	2638105	-35886	-0.288146	1	0.341743	0.994342	-1.26794	0.842626	FALSE
1	2638795	2638991	-35000	-2.05562	1	-0.0161701	0.999328	-1.48661	0.752551	FALSE
1	2645136	2645190	-28801	-1.38867	1	0.444421	1	-0.30598	0.982865	FALSE
1	2647824	2647913	-26078	0.0647623	1	-2.39152	1	0.0914217	0.994107	FALSE
1	2649935	2650137	-23854	-0.880114	1	0.210106	0.995656	-0.565375	0.924434	FALSE
1	2656639	2656691	-17300	-3.12415	1	-1.00217	1	-1.57316	0.90492	FALSE
1	2658387	2658437	-15554	-5.13661	1	0.203815	1	-0.615115	0.956666	FALSE
1	2669923	2670319	-3672	-0.756806	0.60739	1.18499	0.761646	-1.54509	0.525158	FALSE
1	2686077	2686146	12068	-2.28141	1	0.994882	1	-0.0541757	0.997459	FALSE
1	2689811	2689909	15802	-3.25782	1	-5.13589	1	-3.96917	0.581448	FALSE
1	2692243	2692318	18234	-2.26758	1	0.123356	1	-0.80364	0.92337	FALSE
1	2694096	2694267	20087	-2.18837	1	-1.11153	0.959456	-1.65492	0.758095	FALSE
1	2695640	2695840	21631	-0.743526	1	0.705478	0.960845	-0.214104	0.973737	FALSE
1	2701164	2701550	27155	-0.143357	1	0.0358693	0.998934	-0.187706	0.980178	FALSE
1	2706599	2706765	32590	-5.54935	1	-1.82061	1	-1.26604	0.864266	FALSE
1	2708488	2708599	34479	-2.9159	1	-1.81906	1	-1.57345	0.85851	FALSE
1	2713387	2713463	39378	-4.28134	1	0.0745558	1	0.566207	0.970675	FALSE
1	2714021	2714108	40012	-1.27997	1	-1.32614	1	-1.38226	0.884172	FALSE
1	2716104	2716273	42095	-0.31755	1	1.185	0.841238	-0.661762	0.896324	FALSE
1	2718524	2718609	44515	-4.67161	1	1.22359	1	-0.0530761	0.997149	FALSE
1	2725086	2725144	51077	-3.1288	1	0.456245	1	-2.31714	0.733283	FALSE
1	2726470	2726513	52461	-0.126223	1	0.547897	1	-5.11516	0.380778	FALSE
1	2728840	2729180	54831	-1.11658	1	-0.295037	0.992942	-1.30126	0.648351	FALSE
1	2741017	2741166	67008	1.94517	1	0.871554	0.963708	0.64268	0.918186	FALSE
1	2743229	2743411	69220	0.250915	1	-0.228378	0.997881	-0.587832	0.95047	FALSE
1	2754266	2754515	80257	0.901369	1	-0.640603	0.98528	-1.54243	0.756431	FALSE
1	2756752	2756995	82743	-0.4697	1	-0.315586	0.994104	-1.03681	0.841242	FALSE
1	2761992	2762110	87983	-4.9042	1	-0.414283	0.994342	-0.121224	0.992643	FALSE
1	2767281	2767356	93272	-3.50891	1	-1.82452	1	-5.71254	0.420856	FALSE
1	2770559	2770813	96550	0.0896557	1	0.768932	0.940439	-1.04158	0.753018	FALSE
1	2790503	2790619	84576	0.723098	1	-0.021694	0.999325	0.505341	0.939041	FALSE
1	2790674	2790799	84396	-2.5737	1	-5.53488	1	-0.946954	0.926954	FALSE
1	2793088	2793211	81984	-5.42809	1	-0.0610068	1	-1.07278	0.932192	FALSE
1	2795517	2795585	79610	-1.39637	1	0.939623	1	0.768873	0.935184	FALSE
1	2798328	2798540	76655	-2.54424	1	-0.406229	0.990839	-0.547457	0.926965	FALSE
1	2799073	2799113	76082	-1.93368	1	-5.38706	1	-4.19173	0.678242	FALSE
1	2800963	2801098	74097	-2.01239	1	-1.39956	1	-1.76924	0.772318	FALSE
1	2807026	2807099	68096	1.5545	1	0.00681176	1	-0.742924	0.945063	FALSE
1	2812631	2812711	62484	-0.313461	1	2.45033	1	-0.154748	0.992493	FALSE
1	2816719	2816814	58381	-2.98671	1	-0.925559	1	-0.58526	0.958281	FALSE
1	2820638	2820706	54489	0.492105	1	1.95323	1	1.49024	0.796099	FALSE
1	2826919	2826990	48205	-4.92734	1	-0.41381	1	-5.64975	0.443758	FALSE
1	2827254	2827433	47762	-1.57876	1	0.154292	0.998617	-2.26886	0.522711	FALSE
1	2829592	2829788	45407	-1.71918	1	0.858045	0.948282	-0.11837	0.9883	FALSE
1	2846639	2846742	28453	-1.45374	1	-1.84761	0.837444	-0.240714	0.980813	FALSE
1	2848147	2848344	26851	0.762727	1	-3.1143	0.182628	-1.41493	0.689242	FALSE
1	2853993	2854068	21127	-2.12885	1	0.647816	1	-1.25034	0.854852	FALSE
1	2854110	2854323	20872	-0.0438514	1	1.51147	0.703743	0.32219	0.959845	FALSE
1	2859438	2859500	15695	-1.21209	1	-0.0615022	1	-2.73994	0.66723	FALSE
1	2863787	2863846	11349	-5.2608	1	-0.159074	1	-3.57416	0.642425	FALSE
1	2868218	2868280	6915	-3.35731	1	-5.28222	1	-1.77626	0.84626	FALSE
1	2869523	2869602	5593	-3.00946	1	-4.88648	1	-0.687497	0.957736	FALSE
1	2878461	2878928	-3266	0.358314	0.678605	0.176271	0.992614	-0.281475	0.918705	FALSE
1	2886038	2886228	-10843	-0.722493	1	-3.74511	0.299579	-0.996079	0.874926	FALSE
1	2888358	2888443	-13163	-0.0385204	1	-1.06049	0.96876	-0.356037	0.970941	FALSE
1	2892348	2892809	-17153	0.170166	0.859476	0.559647	0.876653	0.770358	0.581394	FALSE
1	2894206	2894312	-19011	0.959499	1	-0.350565	0.992942	1.43944	0.664644	FALSE
1	2894520	2894765	-19325	1.32016	1	0.38803	0.987202	0.577895	0.889727	FALSE
1	2898454	2898543	-23259	-2.20676	1	-0.274649	1	-0.845517	0.936493	FALSE
1	2902541	2902731	-27346	0.485756	1	0.636619	0.981628	0.752174	0.894833	FALSE
1	2905460	2905607	-30265	0.228972	1	-2.33334	0.745717	-2.47917	0.584771	FALSE
1	2907913	2908226	-32718	0.49496	0.577359	0.339042	0.976824	0.322173	0.911267	FALSE
1	2908294	2908338	-33099	-1.37897	1	-5.36968	1	-0.45893	0.975634	FALSE
1	2916216	2916548	-41021	0.314895	0.78471	-0.143208	0.994676	0.0288465	0.995642	FALSE
1	2923781	2923985	-48586	-1.32449	1	-0.753032	0.979528	0.0417172	0.997048	FALSE
1	2929690	2929725	-54495	-1.77883	1	-0.823402	1	-1.18831	0.909583	FALSE
1	2937577	2937748	-62382	0.683212	1	1.22217	0.887321	-1.66349	0.690116	FALSE
1	2937850	2937938	-62655	-1.08709	1	0.907005	1	-0.0378061	0.997478	FALSE
1	2939956	2940089	-64761	-0.457428	1	-0.700649	0.983912	-1.80651	0.700847	FALSE
1	2940152	2940233	-64957	1.70815	1	-1.05672	1	1.33512	0.837542	FALSE
1	2942122	2942175	-66927	0.0349134	1	-1.31786	1	-2.52539	0.74413	FALSE
1	2943895	2943939	-68700	-0.16947	1	0.0524528	1	-0.281154	0.984808	FALSE
1	2951464	2951579	-76269	0.280783	1	-0.850592	0.969175	-0.66669	0.915317	FALSE
1	2951650	2951780	-76455	-0.152206	1	-0.629102	0.990224	0.1853	0.987026	FALSE
1	2957931	2958048	-82736	-0.353938	1	-0.845819	0.97727	0.621247	0.932199	FALSE
1	2960171	2960284	-84976	-1.07557	1	-0.0436684	1	-5.73344	0.304924	FALSE
1	2965508	2965582	-90313	-2.66735	1	-0.995916	1	-0.257161	0.985366	FALSE
1	2967765	2967874	-92570	-2.88989	1	0.0175211	1	-1.26383	0.863685	FALSE
1	2975983	2976171	-100788	-0.0161139	1	1.25427	0.91326	-1.18713	0.843034	FALSE
1	2989636	2990078	-114441	0.218632	0.759891	0.228496	0.980039	0.539401	0.664954	FALSE
1	3005664	3005821	-130469	-1.55352	1	-1.86476	1	-2.67411	0.665562	FALSE
1	3018389	3018467	-143194	-4.64818	1	0.972821	1	-1.64613	0.85858	FALSE
1	3022520	3022789	-147325	-0.457862	1	0.679412	0.958524	-1.1325	0.719544	FALSE
1	3037547	3037634	-162352	-0.798518	1	-0.419735	1	-1.90841	0.780061	FALSE
1	3042747	3043012	-167552	-1.05471	1	0.215242	0.995595	-3.10695	0.240914	FALSE
1	3046560	3046612	-171365	-3.63647	1	-1.23082	1	-5.84207	0.419889	FALSE
1	3048509	3048615	-173314	-1.79516	1	0.0307857	1	-1.64627	0.793477	FALSE
1	3068954	3069017	-193759	-2.6748	1	2.1003	1	-0.569541	0.961247	FALSE
1	3072417	3072531	-197222	-1.21551	1	-0.639662	1	-0.645208	0.947496	FALSE
1	3074095	3074189	-198900	-2.80335	1	0.467716	1	-0.382024	0.969484	FALSE
1	3084588	3084740	-209393	-0.274288	1	0.298106	0.994676	-0.442586	0.957328	FALSE
1	3093708	3093761	-218513	-0.971291	1	-0.28977	1	0.638424	0.960709	FALSE
1	3100597	3100665	-225402	-4.28944	1	1.28164	1	0.467536	0.967286	FALSE
1	3127284	3127473	-234640	1.10346	1	-1.59779	0.679161	0.64029	0.891003	FALSE
1	3136395	3136475	-225638	-1.98117	1	1.28792	1	-1.04983	0.908513	FALSE
1	3139201	3139457	-222656	-0.999293	1	0.773259	0.977418	0.30569	0.972059	FALSE
1	3142025	3142109	-220004	-5.01831	1	-5.47334	1	-0.297201	0.982703	FALSE
1	3178393	3178501	-183612	0.147823	1	-0.9014	0.968149	-0.962779	0.870148	FALSE
1	3180062	3180130	-181983	-1.5679	1	-1.59977	1	-0.682926	0.949046	FALSE
1	3183685	3183782	-178331	0.496571	1	0.319084	1	-0.702325	0.951246	FALSE
1	3187779	3188052	-174061	-1.41675	1	-6.41678	0.0869152	-1.2408	0.838248	FALSE
1	3192748	3192885	-169228	1.34351	1	1.45196	0.880141	-1.23868	0.846869	FALSE
1	3195530	3195783	-166330	-6.41961	1	-0.808886	0.974451	-2.13433	0.549883	FALSE
1	3195918	3195970	-166143	-4.17491	1	-1.44708	1	0.13939	0.993692	FALSE
1	3201003	3201154	-160959	-5.12062	1	0.313715	0.995656	-0.399589	0.97107	FALSE
1	3201197	3201294	-160819	-4.88391	1	-0.331074	1	-1.31192	0.896242	FALSE
1	3207332	3207430	-154683	1.02557	1	0.4766	0.994104	-1.49877	0.860389	FALSE
1	3207600	3207712	-154401	-1.09528	1	0.774031	0.987202	-0.428916	0.970507	FALSE
1	3207840	3207928	-154185	-3.87928	1	0.210894	1	-0.981683	0.92171	FALSE
1	3208003	3208145	-153968	-1.55917	1	-1.04435	0.960845	-0.677232	0.925791	FALSE
1	3214448	3214496	-147617	-0.508464	1	-0.276784	1	-0.738893	0.936498	FALSE
1	3217905	3218002	-144111	-3.25296	1	0.648082	1	-0.253405	0.982486	FALSE
1	3218086	3218454	-143659	-0.421025	1	-0.549511	0.988614	-0.395468	0.961568	FALSE
1	3221774	3221930	-140183	-1.53882	1	-1.15495	1	-2.58722	0.587598	FALSE
1	3221963	3222018	-140095	-3.54969	1	0.829963	1	0.521581	0.970557	FALSE
1	3225213	3225476	-136637	-0.799066	1	-0.59699	0.983168	-0.812729	0.884172	FALSE
1	3227979	3228135	-133978	-0.443503	1	0.268642	0.995859	-1.5879	0.781464	FALSE
1	3233874	3233930	-128183	-2.62819	1	-1.33115	1	-0.406515	0.972967	FALSE
1	3234002	3234208	-127905	0.7543	1	-1.56618	0.847144	-1.33343	0.788054	FALSE
1	3242918	3242984	-119129	0.370441	1	1.90924	0.768519	-3.55839	0.547881	FALSE
1	3247716	3248046	-114067	-0.707752	1	-0.20693	0.994621	-1.22022	0.683473	FALSE
1	3256460	3256563	-105550	0.404436	1	-1.7137	1	1.02562	0.896446	FALSE
1	3275170	3275378	-86735	-1.4057	1	0.195146	0.995888	-0.897823	0.86147	FALSE
1	3279871	3279944	-82169	0.667315	1	-0.479334	1	-2.85269	0.708711	FALSE
1	3300620	3300679	-61434	-4.07988	1	-4.53491	1	-4.80229	0.589149	FALSE
1	3300752	3300929	-61184	-1.95962	1	0.127336	0.998725	-0.0270354	0.99816	FALSE
1	3305396	3305696	-56417	-0.378975	0.774378	1.42308	0.362339	0.661407	0.822082	FALSE
1	3306234	3306314	-55799	0.442124	1	-0.683721	1	-2.29981	0.712966	FALSE
1	3310382	3310483	-51630	-0.9229	1	0.949083	0.965226	-0.910983	0.894128	FALSE
1	3320743	3320926	-41187	-0.0619279	0.951231	-0.894593	0.526092	0.915781	0.442052	FALSE
1	3322365	3322590	-39523	-0.61347	1	-0.63046	0.983562	-0.885206	0.880527	FALSE
1	3329266	3329447	-32666	-0.873214	1	0.995732	0.956245	-0.749228	0.9142	FALSE
1	3332087	3332214	-29899	-1.24449	1	-0.613323	0.971045	-0.345567	0.946877	FALSE
1	3332751	3332808	-29305	-0.445779	1	-0.766893	1	-3.17026	0.566318	FALSE
1	3337993	3338138	-23975	0.596652	1	1.11418	0.935508	0.0491011	0.996664	FALSE
1	3341127	3341227	-20886	-3.93507	1	0.288535	1	-1.6431	0.775002	FALSE
1	3343955	3344151	-17962	0.733721	1	-0.23546	0.993969	-0.0946819	0.988226	FALSE
1	3346105	3346300	-15813	-0.77298	1	1.08947	0.902106	0.451254	0.941638	FALSE
1	3356269	3356321	-5792	-0.281028	1	-0.952965	1	-0.42738	0.975768	FALSE
1	3376025	3376223	13912	-3.7233	1	1.09727	0.935022	0.267154	0.974537	FALSE
1	3379165	3379341	17052	-0.654397	1	0.495596	0.992614	-1.00462	0.889727	FALSE
1	3386267	3386425	24154	-0.923785	1	-0.0824699	0.998725	0.079598	0.991434	FALSE
1	3390637	3390884	28524	-2.40827	1	-3.14571	0.429996	-2.66564	0.508234	FALSE
1	3399241	3399323	37128	-0.131539	1	1.05201	1	-1.8442	0.838617	FALSE
1	3401282	3401334	39169	-4.26727	1	0.502936	1	-1.2328	0.909719	FALSE
1	3403512	3403583	41399	-3.31951	1	0.889678	1	0.386639	0.969792	FALSE
1	3410670	3410739	48557	-4.81815	1	-0.043093	1	-1.33462	0.89564	FALSE
1	3421227	3421297	59114	-4.77344	1	-1.94999	1	-0.759985	0.956266	FALSE
1	3426776	3427131	64663	-1.3483	1	-1.08316	0.937133	-2.08816	0.525559	FALSE
1	3429052	3429138	66939	0.0314885	1	-5.239	1	-0.132845	0.993433	FALSE
1	3430992	3431138	68879	0.367037	1	0.429626	0.992942	-1.97066	0.673189	FALSE
1	3435131	3435252	73018	-0.634515	1	-6.83643	0.0796654	-0.810767	0.916591	FALSE
1	3457463	3457566	95350	-0.000691824	1	-2.00402	1	-1.16299	0.900215	FALSE
1	3466626	3466662	104513	-2.43445	1	-4.37698	1	-3.18182	0.803532	FALSE
1	3468593	3468653	106480	-0.822595	1	1.24451	1	-3.21061	0.689655	FALSE
1	3468731	3468850	106618	0.498361	1	-0.26522	0.995078	-1.4592	0.770513	FALSE
1	3487641	3487716	125528	-0.511674	1	-4.83143	1	-1.69771	0.884204	FALSE
1	3490682	3490747	128569	-1.41451	1	-1.41027	1	-1.31953	0.893277	FALSE
1	3494210	3494450	132097	-1.18249	1	1.22675	0.805251	-0.409296	0.942612	FALSE
1	3496249	3496355	134136	-0.990436	1	-0.872835	1	-0.331294	0.980079	FALSE
1	3520296	3520387	158183	0.593367	1	-4.999	1	-3.83236	0.608279	FALSE
1	3524241	3524272	162128	-2.44321	1	0.584733	1	-2.67993	0.70436	FALSE
1	3528088	3528320	165975	-0.12262	1	-0.317776	0.993718	0.107445	0.989846	FALSE
1	3533335	3533501	171222	-0.127991	1	1.51022	0.852715	-2.48803	0.525049	FALSE
1	3542742	3542778	180629	-3.18545	1	-0.376889	1	-2.97201	0.72736	FALSE
1	3553082	3553208	-170699	0.894681	1	0.417676	0.992614	-1.59497	0.729486	FALSE
1	3553305	3553355	-170552	-1.7316	1	-0.793524	1	-1.78559	0.836179	FALSE
1	3566555	3566730	-157177	0.793009	1	1.101	0.906794	-0.0652797	0.994022	FALSE
1	3577379	3577474	-146433	-5.66837	1	-2.18372	1	-1.98258	0.825603	FALSE
1	3593292	3593369	-130538	1.8961	1	-1.66704	0.92035	-0.521684	0.956949	FALSE
1	3613774	3613837	-110070	1.835	1	2.14511	0.793343	1.07299	0.89557	FALSE
1	3615324	3615456	-108451	1.28531	1	0.397184	0.987179	0.974928	0.750122	FALSE
1	3626174	3626294	-97613	-0.39657	1	-1.39908	1	-2.11868	0.717982	FALSE
1	3628917	3629077	-94830	-0.225305	1	0.260354	0.998553	-1.73341	0.850833	FALSE
1	3631691	3631859	-92048	-4.01564	1	-1.44658	0.927625	-2.4352	0.596626	FALSE
1	3635933	3636256	-87651	-2.12459	1	0.310999	0.994985	-1.51035	0.796799	FALSE
1	3636316	3636464	-87443	-0.0268852	1	1.13211	0.787039	-0.0661111	0.992317	FALSE
1	3638410	3638449	-85458	-4.11129	1	-1.99777	1	-1.06016	0.929478	FALSE
1	3642535	3642630	-81277	-5.11823	1	0.691558	1	-2.09918	0.774482	FALSE
1	3642766	3642968	-80939	-2.49595	1	0.0675681	0.998725	-1.2496	0.705047	FALSE
1	3645047	3645170	-78737	-0.816268	1	-5.05508	1	-1.53464	0.855845	FALSE
1	3647386	3647459	-76448	-0.298708	1	-1.97403	1	-5.5295	0.369	FALSE
1	3650205	3650595	-73312	0.947186	0.149232	0.692128	0.760983	0.959832	0.414685	FALSE
1	3657049	3657177	-66730	-0.029127	1	-0.151037	0.998617	-1.29885	0.817178	FALSE
1	3657516	3657655	-66252	0.559279	1	0.832869	0.974451	0.0599245	0.995642	FALSE
1	3667492	3667640	-56267	-4.31012	1	-0.255489	1	-2.46048	0.538128	FALSE
1	3675484	3675552	-48355	-3.34403	1	-1.36698	1	-1.21801	0.914044	FALSE
1	3701344	3701588	-22319	0.407525	1	0.787594	0.949436	-0.639089	0.898292	FALSE
1	3708717	3708834	-15073	-3.46958	1	0.619503	1	-5.61694	0.305651	FALSE
1	3714954	3715025	-8882	-0.246078	1	0.571583	1	-1.46361	0.831817	FALSE
1	3715121	3715253	-8654	-0.371405	1	1.39678	0.946862	-0.0108277	0.999136	FALSE
1	3718917	3718984	-4923	0.315443	1	0.162336	1	-1.09018	0.902992	FALSE
1	3734137	3734218	10230	-5.10353	1	0.337492	1	-2.80955	0.680487	FALSE
1	3742408	3742606	18501	-1.37402	1	-0.627989	0.985394	-2.65734	0.455911	TRUE
1	3745005	3745262	21098	-5.47498	1	0.895482	0.941904	-0.602067	0.915317	FALSE
1	3745297	3745396	21390	-3.67318	1	1.49167	1	0.964446	0.923784	FALSE
1	3745436	3745538	21529	1.78658	1	0.350889	0.994402	1.49014	0.789608	FALSE
1	3748116	3748169	24209	-2.82251	1	-4.69549	1	-4.96287	0.545475	FALSE
1	3753150	3753258	29243	-0.211276	1	0.616931	0.98676	-0.175058	0.986124	FALSE
1	3759445	3759594	24760	-0.602414	1	-0.258129	0.996315	-0.947951	0.901839	FALSE
1	3759633	3759724	24630	0.0544043	1	-0.00578381	1	-0.659746	0.947681	FALSE
1	3779880	3780079	4275	0.618217	1	-0.507791	0.983864	-0.458856	0.933422	FALSE
1	3789477	3789537	-5123	0.819093	1	0.422011	1	-2.39661	0.686316	FALSE
1	3789765	3789995	-5411	-1.7259	1	0.866881	0.971894	-0.963892	0.880164	FALSE
1	3795084	3795247	-10730	0.668127	1	1.16763	0.930227	-0.898252	0.890897	FALSE
1	3795409	3795554	-11055	-0.615904	1	0.398228	0.992942	-0.902541	0.895621	FALSE
1	3795691	3795799	-11337	-0.830352	1	1.46045	0.985671	-0.593585	0.977973	FALSE
1	3797470	3797684	-13116	-1.16689	1	-0.260677	0.995888	-0.410304	0.964565	FALSE
1	3806988	3807058	16927	-0.829342	1	-4.81965	1	-1.36507	0.906481	FALSE
1	3851567	3851855	-27582	1.18001	1	0.717322	0.921854	0.310658	0.943538	FALSE
1	3860352	3860402	-36367	0.302994	1	0.0857625	1	-1.91089	0.805743	FALSE
1	3860653	3860902	-36668	0.441577	1	1.63332	0.617547	0.167198	0.98161	FALSE
1	3865402	3865812	-41417	0.0228059	1	-0.702483	0.963548	-0.123279	0.985886	FALSE
1	3870028	3870138	-46043	-2.08135	1	-0.304518	1	-0.933077	0.922971	FALSE
1	3872032	3872084	-48047	-1.42343	1	-2.23517	1	-3.65368	0.699043	FALSE
1	3882050	3882141	-58065	-0.0848842	1	0.624164	0.990657	-0.272981	0.98205	FALSE
1	3882319	3882506	-58334	-0.86703	1	0.407929	0.992614	-0.471124	0.946689	FALSE
1	3885819	3886112	-61834	-3.14525	1	0.818301	0.965226	-0.763445	0.894776	FALSE
1	3898502	3898589	-74517	-4.76561	1	1.13493	1	-3.07753	0.70691	FALSE
1	3918739	3919079	-94754	-0.777816	0.443278	-0.660623	0.912804	-0.473209	0.881346	FALSE
1	3920295	3920355	-96310	-0.131371	1	0.957854	0.972111	-0.391298	0.967804	FALSE
1	3921642	3921725	-97657	-2.26113	1	-5.2336	1	-1.01086	0.936357	FALSE
1	3929706	3929848	-105721	0.467885	1	-0.237793	0.995888	-0.935685	0.887256	FALSE
1	3934319	3934404	-110334	2.82083	1	2.76769	0.399167	1.23225	0.845634	FALSE
1	3941317	3941414	-117332	-1.3598	1	-2.00876	1	-5.86625	0.267918	FALSE
1	3943974	3944083	-119989	-4.23966	1	0.438378	0.994124	-1.92266	0.776888	FALSE
1	3947737	3947864	-123752	-1.21189	1	-0.908467	0.981929	-1.02393	0.902995	FALSE
1	3954099	3954172	-130114	1.17471	1	0.318174	1	1.58741	0.876939	FALSE
1	3958540	3958613	-134555	-5.44992	1	0.38909	1	-1.77303	0.813868	FALSE
1	3961459	3961596	-137474	0.0356931	1	-1.21116	0.960545	-1.6213	0.799892	FALSE
1	3968558	3968899	-144573	-1.61996	1	-1.61719	0.589909	-1.71257	0.474522	FALSE
1	3982689	3982783	-158704	0.22589	1	-1.35347	0.941698	-2.03301	0.696347	FALSE
1	3982858	3982982	-158873	-1.65093	1	-0.446568	0.992862	-0.170057	0.986094	FALSE
1	4004288	4004377	-180303	-2.32613	1	-0.186448	1	-3.56205	0.518562	FALSE
1	4008386	4008467	-184401	-3.39054	1	-0.685392	1	-3.14324	0.683065	FALSE
1	4008962	4008997	-184977	-3.36998	1	0.384012	1	0.494528	0.973941	FALSE
1	4012026	4012137	-188041	0.428381	1	-0.491786	0.993103	-0.218288	0.985932	FALSE
1	4012212	4012268	-188227	-1.19955	1	-5.19074	1	-3.01523	0.72211	FALSE
1	4014123	4014238	-190138	-3.37283	1	-2.11945	1	-1.00584	0.936262	FALSE
1	4014291	4014334	-190306	-4.23711	1	0.634783	1	-0.961237	0.9411	FALSE
1	4021118	4021213	-197133	2.00264	1	-4.75698	0.405895	-0.286003	0.98205	FALSE
1	4029103	4029334	-205118	0.130242	1	0.839219	0.934749	-1.08231	0.773661	FALSE
1	4032695	4032775	-208710	-0.4567	1	-0.292394	1	0.167833	0.989233	FALSE
1	4037035	4037139	-213050	-3.93038	1	-5.85111	1	-1.8618	0.804031	FALSE
1	4041181	4041281	-217196	0.0715648	1	-1.66473	1	-2.99456	0.625695	FALSE
1	4042534	4042732	-218549	0.564247	1	0.143285	0.998617	-0.347914	0.962146	FALSE
1	4042802	4042868	-218817	0.0188046	1	-5.31083	1	-1.83901	0.85821	FALSE
1	4057407	4057484	-233422	-0.341863	1	-5.19044	1	-5.45781	0.389398	FALSE
1	4062427	4062469	-238442	0.675196	1	-2.4764	1	-2.06907	0.83687	FALSE
1	4064328	4064470	-240343	1.0672	1	0.483398	0.990657	-0.754508	0.912495	FALSE
1	4068702	4068779	-244717	0.286505	1	1.18442	1	0.620231	0.958616	FALSE
1	4075427	4075499	-251442	1.24812	1	-2.07504	1	-3.23639	0.538046	FALSE
1	4080671	4080779	-256686	0.084963	1	-5.4383	1	-5.70567	0.372204	FALSE
1	4084138	4084171	-260153	1.22006	1	-0.720762	1	-1.14644	0.931037	FALSE
1	4088379	4088470	-264394	0.479133	1	2.42023	0.587404	-0.310737	0.976924	FALSE
1	4100053	4100389	262153	-0.726481	1	-0.310516	0.99338	-0.428655	0.94507	FALSE
1	4104150	4104240	258302	-2.35688	1	-2.15105	1	-1.14385	0.911064	FALSE
1	4113451	4113534	249008	-4.91652	1	-5.37155	1	-5.63892	0.533394	FALSE
1	4124542	4124939	237603	-0.895063	1	-0.842823	0.923089	-0.78011	0.836525	FALSE
1	4127159	4127392	235150	-0.340123	1	0.461294	0.988332	-3.00399	0.286869	FALSE
1	4132700	4132731	229811	2.08822	1	-2.96867	1	-0.180517	0.990105	FALSE
1	4132961	4132992	229550	-2.20833	1	-5.20288	1	-5.47025	0.599842	FALSE
1	4137906	4137999	224543	-0.813082	1	-4.79524	1	-0.597213	0.960657	FALSE
1	4141731	4141861	220681	-5.34391	1	-0.458554	1	-3.06806	0.53629	FALSE
1	4145972	4146041	216501	-0.916207	1	0.699929	1	-0.488764	0.966621	FALSE
1	4160089	4160152	202390	0.84135	1	-0.401687	1	-1.12576	0.897983	FALSE
1	4160518	4160632	201910	-2.48961	1	-0.0779531	1	-0.599967	0.954778	FALSE
1	4163240	4163313	199229	-1.34916	1	1.21622	0.956143	0.414808	0.967108	FALSE
1	4164619	4164793	197749	1.40145	1	1.35914	0.480217	-0.317077	0.942742	FALSE
1	4171084	4171169	191373	-4.9607	1	0.678272	1	-4.24737	0.470477	FALSE
1	4177620	4177729	184813	-1.02205	1	-1.87511	1	-4.9689	0.442777	FALSE
1	4181204	4181263	181279	-1.0196	1	-4.81768	1	-1.59738	0.91019	FALSE
1	4185546	4185653	176889	-3.48077	1	0.667397	0.975883	0.376559	0.954503	FALSE
1	4187338	4187447	175095	-5.65074	1	-1.89287	1	-2.30017	0.797183	FALSE
1	4191548	4191616	170926	-1.36735	1	0.85549	1	-0.698782	0.953611	FALSE
1	4199996	4200156	162386	-1.80513	1	-3.6517	1	-1.85451	0.7028	FALSE
1	4212245	4212299	150243	-1.70283	1	-4.67677	1	-0.961712	0.943797	FALSE
1	4236604	4236924	125618	-0.165401	1	-0.964653	0.95091	-1.27305	0.781992	FALSE
1	4238718	4238793	123749	1.70116	1	2.10258	0.884541	0.762461	0.947948	FALSE
1	4246242	4246345	116197	-4.90692	1	-1.0031	1	-4.19589	0.571206	FALSE
1	4257133	4257299	105243	2.02478	1	0.680729	0.986896	-1.20925	0.87081	FALSE
1	4257333	4257399	105143	-2.42516	1	-0.758918	1	-2.14688	0.84141	FALSE
1	4269703	4269764	92778	-3.88057	1	-5.75233	1	-6.0197	0.436105	FALSE
1	4269888	4269972	92570	-0.735685	1	-2.32606	1	-1.08994	0.913707	FALSE
1	4271723	4271894	90648	-0.416723	1	-1.87654	0.883612	-1.38455	0.85331	FALSE
1	4281886	4282001	80541	0.86778	1	-0.388273	0.995656	-0.680599	0.955494	FALSE
1	4293411	4293477	69065	-1.37627	1	-3.91306	1	-1.60191	0.866935	FALSE
1	4297962	4298034	64508	-3.06043	1	-1.33951	1	-1.48205	0.891977	FALSE
1	4303510	4303763	58779	0.183703	1	0.957994	0.940069	-1.27804	0.775356	FALSE
1	4307319	4307439	55103	-0.10094	1	-1.66596	0.883304	-0.630569	0.93879	FALSE
1	4309004	4309183	53359	0.0227304	1	0.0709976	0.998934	-0.605418	0.954475	FALSE
1	4313894	4314093	48449	-0.126053	1	-0.95144	0.9757	-0.676095	0.936821	FALSE
1	4316163	4316286	46256	1.33216	1	0.0119375	0.999385	-5.27503	0.296759	FALSE
1	4320547	4320585	41957	0.540931	1	-1.40489	1	-5.51622	0.442227	FALSE
1	4323637	4323805	38737	-0.857185	1	0.186469	0.9968	-2.19688	0.491401	FALSE
1	4328777	4329037	33505	-0.451015	1	-0.490561	0.9896	-0.568099	0.932113	FALSE
1	4351374	4351589	10953	-0.365497	1	-1.18189	0.912447	-0.656934	0.913218	FALSE
1	4366102	4366245	-3560	-4.24955	1	0.143517	0.998725	-1.5539	0.789608	FALSE
1	4371941	4371992	-9399	1.77637	1	-4.67515	1	-0.488443	0.967343	FALSE
1	4378657	4378707	-16115	0.50999	1	-4.64627	1	-4.91364	0.540455	FALSE
1	4378743	4378858	-16201	0.489706	1	-0.745607	0.978214	-1.07627	0.845907	FALSE
1	4382396	4382604	-19854	-1.07281	1	0.544042	0.981069	-0.208601	0.975762	FALSE
1	4407631	4407770	-45089	0.0418402	1	-0.65701	0.990657	-1.85898	0.784418	FALSE
1	4413009	4413101	-50467	-0.4833	1	0.0936843	1	-4.69018	0.461607	FALSE
1	4413146	4413245	-50604	-2.50561	1	0.749669	0.980039	0.0651031	0.995324	FALSE
1	4434261	4434791	-71719	0.554451	0.375101	1.07586	0.14276	0.0995449	0.973068	FALSE
1	4437272	4437376	-74730	-2.27784	1	-0.977182	1	-2.44648	0.752747	FALSE
1	4437480	4437557	-74938	-5.21747	1	-1.20088	1	-2.4768	0.759834	FALSE
1	4443146	4443215	-80604	-3.94285	1	0.412515	1	-1.59863	0.897156	FALSE
1	4451887	4452439	-89345	0.534092	0.539676	-1.31209	0.271568	-0.462775	0.857632	FALSE
1	4453582	4453619	-91040	-0.0476932	1	-5.00598	1	-1.55341	0.900892	FALSE
1	4458699	4458787	-96157	-3.02883	1	-0.439783	1	-0.63635	0.953894	FALSE
1	4461440	4461510	-96025	-0.661002	1	1.16886	1	0.849076	0.933041	FALSE
1	4463811	4463851	-93684	-5.05733	1	-1.26205	1	-2.76509	0.780262	FALSE
1	4466174	4466262	-91273	0.569107	1	0.0561489	1	-0.347488	0.977621	FALSE
1	4477437	4477527	-80008	-1.32158	1	-0.981516	1	-5.03011	0.3633	FALSE
1	4480539	4480881	-76654	0.3453	0.57623	0.235074	0.976824	0.281587	0.877924	FALSE
1	4484512	4484649	-72886	0.637175	1	-0.574422	0.989828	-0.59557	0.942101	FALSE
1	4484698	4484860	-72675	-0.831707	1	0.152123	0.996984	-0.226113	0.971649	FALSE
1	4491764	4491799	-65736	-1.90281	1	-0.984412	1	-0.215463	0.990622	FALSE
1	4491842	4492153	-65382	-2.62012	1	-0.548102	0.974549	-0.371703	0.939064	FALSE
1	4498747	4498929	-58606	-0.50185	1	-0.334692	0.992942	-2.61919	0.392408	FALSE
1	4502385	4502492	-55043	-1.23319	1	-5.77853	1	-1.83771	0.802583	FALSE
1	4502624	4502869	-54666	0.520916	1	-1.58165	0.622292	0.489194	0.912258	TRUE
1	4508043	4508126	-49409	0.116235	1	1.33847	0.895929	0.126168	0.990002	FALSE
1	4508169	4508303	-49232	-1.14711	1	-0.695331	0.964655	0.198657	0.974687	FALSE
1	4510360	4510394	-47141	-4.37611	1	-0.766316	1	0.842092	0.951299	FALSE
1	4512681	4513058	-44477	-0.0144635	0.995166	-0.888608	0.938864	0.57419	0.908087	FALSE
1	4521274	4521343	-36192	-3.16553	1	0.0593935	1	-1.91621	0.839208	FALSE
1	4522604	4522931	-34604	0.159209	1	-1.07037	0.833661	-0.213046	0.969063	FALSE
1	4526551	4526604	-30931	-3.84442	1	-4.29945	1	-4.56683	0.650935	FALSE
1	4528389	4528605	-28930	-1.15661	1	0.288449	0.992614	0.569743	0.889271	FALSE
1	4528716	4529159	-28376	0.378571	0.767273	0.680958	0.921971	0.168751	0.972059	FALSE
1	4536800	4536886	-20649	-1.47424	1	0.086784	1	-1.67622	0.820877	FALSE
1	4538805	4539156	-18379	-0.0259209	1	-0.290235	0.992942	0.0108777	0.998529	FALSE
1	4540435	4540491	-17044	0.476796	1	-3.60626	1	-5.27829	0.41202	FALSE
1	4549084	4549171	-8364	0.588424	1	-1.50063	1	-0.645794	0.942859	FALSE
1	4552708	4552921	-4614	1.17205	0.250045	1.30034	0.52916	0.710207	0.815348	FALSE
1	4562257	4562350	4722	0.0645939	1	0.0102139	0.999378	0.101914	0.989088	FALSE
1	4563090	4563199	5555	0.824702	1	-0.429647	0.992942	0.827856	0.895002	FALSE
1	4570266	4570498	12731	-1.08596	1	1.23358	0.832536	0.286243	0.964448	FALSE
1	4573871	4574136	16336	-0.0103877	1	1.14417	0.852251	0.592847	0.90492	FALSE
1	4580986	4581249	23451	1.26025	0.169219	1.68984	0.147329	1.32669	0.408347	FALSE
1	4584629	4584803	27094	-0.703641	1	-0.126653	0.99865	0.245285	0.974435	FALSE
1	4594862	4595003	37327	0.0756606	1	0.37393	0.992614	0.212607	0.977455	TRUE
1	4595555	4595776	38020	-0.622959	1	-5.89435	0.0978725	0.768102	0.899932	FALSE
1	4631017	4631118	65827	-0.108155	1	-2.58642	1	-3.74615	0.614948	FALSE
1	4634229	4634601	62344	0.0395856	1	-0.478203	0.976765	0.0797048	0.988972	FALSE
1	4637594	4637626	59319	-1.9477	1	-4.84644	1	-1.13099	0.928083	FALSE
1	4640339	4640454	56491	0.515572	1	-0.0238862	0.999325	-0.436635	0.957552	FALSE
1	4649042	4649156	47789	-2.7829	1	0.234946	0.995888	0.417175	0.95741	FALSE
1	4667193	4667379	29566	-0.85296	1	-0.134038	0.997881	0.754701	0.851298	FALSE
1	4667999	4668089	28856	-4.92207	1	-5.37711	1	-0.258711	0.984808	FALSE
1	4670054	4670201	26744	-0.0599232	1	-0.694651	0.952346	1.34937	0.522268	FALSE
1	4681146	4681253	15692	-0.302804	1	-0.770514	0.981541	-2.07412	0.639327	FALSE
1	4683595	4683848	13097	0.648551	1	-1.2554	0.84872	0.468394	0.9296	FALSE
1	4701332	4701388	-3283	0.664989	1	0.0246457	0.999328	-0.549365	0.955326	FALSE
1	4710171	4710510	5442	-0.672713	0.618073	-0.21132	0.994104	0.386003	0.929987	FALSE
1	4716493	4716606	-8028	-2.81726	1	-0.451243	1	-4.58122	0.3946	FALSE
1	4720272	4720442	-4192	0.720432	1	1.18906	0.916511	-1.64564	0.720931	FALSE
1	4720806	4720900	-3734	-1.49292	1	-0.716844	1	-3.68537	0.483431	FALSE
1	4735760	4735962	-3623	-0.789472	1	-1.15259	0.955131	-1.57621	0.776945	FALSE
1	4752072	4752212	5481	-0.228826	1	1.30828	0.840502	-0.773548	0.891373	FALSE
1	4761571	4761680	-3874	-0.163497	1	0.830241	0.970323	0.196775	0.982075	FALSE
1	4764662	4764740	-6965	0.143859	1	-1.47332	1	-2.35555	0.790811	FALSE
1	4767800	4767990	-10103	0.219201	1	0.173528	0.994621	-0.115213	0.982535	FALSE
1	4770507	4770759	-12810	-3.2632	1	-0.27625	0.994621	-0.0687794	0.994142	FALSE
1	4773040	4773186	-14808	-1.77452	1	-1.35495	1	-3.46994	0.484898	FALSE
1	4775308	4775486	-12508	-0.329811	1	-1.27825	0.936072	-0.658287	0.931741	FALSE
1	4780302	4780499	-7495	0.451531	1	-0.357673	0.994104	0.219329	0.981857	FALSE
1	4792198	4792673	4204	0.651032	0.400146	-0.116648	0.994877	-0.336563	0.901017	FALSE
1	4804208	4804328	4728	-0.692564	1	-0.411194	0.993489	-0.796493	0.916505	FALSE
1	4805186	4805294	5706	-3.97012	1	-0.957295	1	-1.65757	0.783734	FALSE
1	4805442	4805763	5962	-1.23714	1	-1.64084	0.639805	-0.0773224	0.991764	FALSE
1	4821849	4821930	-7992	-5.63223	1	1.16879	0.905117	-0.113892	0.989955	FALSE
1	4823987	4824141	-10130	-0.684257	1	0.827663	0.97178	0.608395	0.927656	TRUE
1	4826439	4826626	-12582	-0.100802	1	0.784972	0.955299	0.067056	0.993433	FALSE
1	4830698	4830773	13987	0.84976	1	-1.72989	1	-2.92472	0.611881	FALSE
1	4830977	4831034	13726	-1.65927	1	-0.347449	1	-0.728105	0.947443	FALSE
1	4836117	4836273	8487	-0.136102	1	1.4272	0.861329	-1.85721	0.660577	FALSE
1	4838630	4838702	6058	-1.39879	1	0.329032	1	-3.73809	0.582081	FALSE
1	4838919	4838992	5768	-5.10449	1	-1.10757	1	-0.783244	0.935655	FALSE
1	4850440	4850497	-5180	-3.11135	1	0.61266	1	-0.304171	0.982094	FALSE
1	4850541	4850630	-5281	-1.92011	1	-0.541616	1	-1.12661	0.872833	FALSE
1	4851117	4851320	-5857	0.064964	1	1.06941	0.903088	-0.415501	0.947443	FALSE
1	4854029	4854146	-8769	-3.89192	1	1.34055	0.88852	-2.57621	0.504852	FALSE
1	4858730	4858838	-13470	-0.908161	1	1.93218	0.726249	-0.315833	0.973953	FALSE
1	4864903	4865017	-13329	1.59108	1	1.73014	0.878853	1.41752	0.83292	FALSE
1	4873304	4873471	-4875	-1.38596	1	-1.13786	0.889651	-1.2812	0.727388	FALSE
1	4886702	4886889	8356	-0.0267618	1	0.70822	0.9799	-0.922222	0.87785	FALSE
1	4895737	4896000	17391	-0.545413	1	-1.80213	0.724442	-0.155492	0.985437	FALSE
1	4899139	4899228	20793	0.668664	1	-0.128771	0.998725	-0.785217	0.905138	FALSE
1	4903393	4903561	25047	-1.72813	1	-3.12918	0.355275	-2.28701	0.543639	FALSE
1	4908224	4908411	29878	-0.88544	1	0.502235	0.988093	-1.30837	0.778575	FALSE
1	4909041	4909182	30695	-5.18592	1	0.703543	0.98526	-0.0703039	0.995317	FALSE
1	4910356	4910406	32010	-2.06752	1	-1.04318	1	-4.29875	0.586075	FALSE
1	4913771	4913847	35425	-0.0389151	1	0.357454	0.995448	-0.693743	0.947799	FALSE
1	4916139	4916232	37793	-0.559391	1	1.69174	1	1.07384	0.931391	FALSE
1	4918234	4918441	39888	1.21659	1	-0.507433	0.984608	-0.390131	0.94671	FALSE
1	4921917	4921976	43571	0.794797	1	-3.18204	1	-0.819593	0.936337	FALSE
1	4922203	4922365	43857	-3.8125	1	-0.690376	1	-1.00635	0.905904	FALSE
1	4922422	4922470	44076	-3.77031	1	-4.22535	1	-1.02584	0.957736	FALSE
1	4922506	4922586	44160	0.741916	1	-3.3784	1	0.163686	0.993455	FALSE
1	4925049	4925289	46703	-0.0363938	1	-0.00905764	0.999378	-0.896984	0.860404	FALSE
1	4925439	4925492	47093	-4.65404	1	-0.66353	1	-5.37645	0.470316	FALSE
1	4929596	4929655	51250	0.52292	1	-1.38334	0.965022	1.6277	0.819797	FALSE
1	4933239	4933342	54893	-0.553883	1	-0.0804819	1	-1.1582	0.958473	FALSE
1	4934073	4934227	55727	-3.03774	1	0.932676	0.965226	-1.1338	0.850474	FALSE
1	4936408	4936581	58062	-1.60139	1	-1.73598	0.814259	-1.07794	0.853972	FALSE
1	4938891	4938951	60545	-1.79251	1	-0.340988	1	-2.04141	0.845512	FALSE
1	4938996	4939269	60650	0.592068	1	-0.543755	0.980039	-0.0424477	0.995642	FALSE
1	4945056	4945094	66710	-4.43548	1	1.20212	1	-3.72263	0.581826	FALSE
1	4947594	4947631	69248	-0.246573	1	-1.21241	1	-1.87378	0.842773	FALSE
1	4948589	4948655	70243	-3.60605	1	-3.19553	1	-0.121754	0.993421	FALSE
1	4955106	4955201	76760	0.446473	1	-0.937484	1	0.223298	0.9886	FALSE
1	4955290	4955402	76944	-5.07923	1	0.146221	1	-0.262821	0.978587	FALSE
1	4960636	4960918	82290	1.27561	1	-0.374624	0.990839	0.0683118	0.993337	FALSE
1	4962002	4962111	83656	1.82108	1	1.05187	0.974549	-0.651265	0.950498	FALSE
1	4962172	4962216	83826	-3.61819	1	-0.451485	1	0.822921	0.957326	FALSE
1	4963574	4963665	84022	-0.214799	1	-0.547609	1	0.0668609	0.996302	TRUE
1	4963715	4963958	83729	1.01095	1	-0.577222	0.975895	0.373166	0.942612	FALSE
1	4966389	4966485	81202	0.428312	1	-5.07441	1	-0.33596	0.976209	FALSE
1	4969973	4970039	77648	-5.00998	1	-0.323784	1	-4.29868	0.542622	FALSE
1	4972413	4972445	75242	-3.55357	1	2.34201	1	0.123716	0.993433	FALSE
1	4973920	4974090	73597	-5.29718	1	0.962237	0.971894	-1.58629	0.793477	FALSE
1	4977556	4977624	70063	-0.655008	1	-4.7783	1	-0.841594	0.950639	FALSE
1	4983216	4983433	64254	0.18736	1	-5.50676	0.148602	-0.781186	0.917362	FALSE
1	4983477	4983546	64141	0.279507	1	-5.19127	1	-2.47098	0.816849	FALSE
1	4986549	4986784	60903	-0.956296	1	-1.58238	0.87845	0.21193	0.981906	FALSE
1	4988126	4988255	59432	-3.68428	1	0.075766	0.998736	-0.0687316	0.995857	FALSE
1	4988291	4988530	59157	-0.811533	1	-0.176747	0.998617	-2.14331	0.600864	FALSE
1	4989077	4989132	58555	-1.91165	1	-0.234015	1	-5.15631	0.486878	FALSE
1	4991436	4991960	55727	0.303157	0.790362	-0.0834858	0.998553	-0.0853027	0.985366	FALSE
1	4997078	4997385	50302	0.781314	0.416948	-0.17218	0.994266	0.22097	0.955854	FALSE
1	4997639	4997898	49789	1.33214	1	-0.14823	0.998617	-1.20908	0.815708	FALSE
1	5001449	5001685	46002	-1.05654	1	0.270663	0.994104	-0.12771	0.986839	FALSE
1	5004523	5004833	42854	-0.506832	1	-0.71189	0.951532	-1.90142	0.378802	FALSE
1	5006579	5006982	40705	-0.057276	1	-1.73055	0.756752	0.266488	0.9719	TRUE
1	5011777	5012244	35443	-0.585439	0.645295	0.174285	0.994342	0.609346	0.84268	FALSE
1	5017071	5017266	30421	1.67241	1	2.63135	0.129801	0.933364	0.836525	FALSE
1	5023497	5023744	23943	0.67222	1	-1.23295	0.893476	-1.56034	0.675955	FALSE
1	5030817	5030882	16805	-5.37719	1	-2.2434	1	-1.34338	0.872796	FALSE
1	5035885	5036016	11671	0.451545	1	0.573518	0.990657	-0.566316	0.953554	FALSE
1	5041883	5041938	5749	-5.003	1	-5.45804	1	-2.65515	0.819797	FALSE
1	5054171	5054407	-5874	-1.7005	1	-0.791542	0.979777	-2.50408	0.495461	FALSE
1	5059087	5059160	-10790	-0.339	1	-0.490759	1	-1.10705	0.895621	FALSE
1	5065973	5066281	-17676	0.252709	0.7862	0.0320445	0.998725	0.141856	0.964687	FALSE
1	5068326	5068562	-20029	0.656576	1	-0.9788	0.934053	1.11628	0.723058	FALSE
1	5068994	5069088	-20697	0.923171	1	0.790214	0.980153	0.841963	0.905904	FALSE
1	5085295	5085390	-36998	-3.03156	1	-0.176152	1	-2.20321	0.748645	FALSE
1	5088426	5088533	-40129	-1.23726	1	-0.17426	1	-0.429943	0.970441	FALSE
1	5101101	5101230	-52804	-1.53062	1	-0.0910947	1	-1.70367	0.788581	FALSE
1	5115249	5115426	-66952	0.123835	1	0.377042	0.992942	-1.77719	0.700169	FALSE
1	5121295	5121474	-72998	0.731298	1	1.29368	0.887321	0.892422	0.875787	FALSE
1	5124288	5124615	-75991	-0.584818	1	0.157384	0.997182	-0.536174	0.920834	FALSE
1	5129683	5129910	-81386	0.71527	1	0.948876	0.945747	0.555298	0.927909	FALSE
1	5132937	5133026	-84640	-2.69199	1	1.99344	1	-0.00624835	0.999494	FALSE
1	5133145	5133231	-84848	-1.90016	1	1.41815	1	-0.0793076	0.99676	FALSE
1	5145490	5145630	-97193	-0.0605506	1	-1.0156	0.969692	0.644716	0.934889	FALSE
1	5149043	5149278	-100746	0.0257309	1	-2.68422	0.437953	-1.50133	0.735289	FALSE
1	5150964	5151064	-102667	-1.11108	1	-1.56009	1	-5.8974	0.339537	FALSE
1	5151333	5151501	-103036	0.706564	1	-0.0544269	0.998725	-0.491514	0.933655	FALSE
1	5153511	5153804	-105214	-0.467216	1	0.962711	0.90532	-0.37117	0.949863	FALSE
1	5155643	5155842	-107346	-0.49346	1	0.926508	0.968115	-0.852851	0.90287	FALSE
1	5168869	5169138	-120572	-0.1566	1	0.306309	0.994985	0.463046	0.957614	FALSE
1	5172653	5172708	-124356	0.0418746	1	-4.92375	1	-0.131061	0.993352	FALSE
1	5175085	5175172	-126788	-0.345634	1	-0.726304	1	-1.98903	0.774197	FALSE
1	5184609	5184705	-136312	0.102128	1	-0.533905	1	-0.465539	0.960007	FALSE
1	5191345	5191396	-143048	0.250148	1	1.43763	1	0.556713	0.962408	FALSE
1	5193463	5193833	-145166	-0.754702	1	0.263255	0.994621	-0.17253	0.98317	FALSE
1	5194040	5194079	-145743	-3.06846	1	-3.49576	1	-0.874016	0.950639	FALSE
1	5194126	5194225	-145829	-1.05719	1	-1.29037	1	-0.321881	0.981067	FALSE
1	5195675	5195867	-147378	1.68254	1	0.306539	0.994104	-0.0197534	0.998048	FALSE
1	5200115	5200198	-151818	-4.21536	1	1.51873	1	-0.949061	0.922374	FALSE
1	5200235	5200493	-151938	-0.42961	1	0.289591	0.993631	0.123358	0.986894	FALSE
1	5203110	5203370	-154813	0.259813	0.839019	0.256348	0.990657	0.0828986	0.986706	FALSE
1	5203638	5203754	-155341	-1.83309	1	-1.46672	0.950713	0.272199	0.982143	FALSE
1	5214805	5215067	-166508	0.551163	1	1.3463	0.65193	-2.00837	0.378747	FALSE
1	5229022	5229091	158872	-2.9564	1	-4.83184	1	-1.65601	0.885998	FALSE
1	5234495	5234558	153405	-1.24403	1	0.877529	1	-2.87122	0.812413	FALSE
1	5236525	5236862	151101	-0.196432	1	-0.0233353	0.999325	-1.51655	0.632009	FALSE
1	5238873	5238929	149034	-4.39128	1	-0.632182	1	-2.70438	0.783085	FALSE
1	5239014	5239193	148770	-1.82441	1	0.758963	0.981541	0.253392	0.978769	FALSE
1	5241605	5241909	146054	-2.56355	1	0.433888	0.985849	-0.0306517	0.997135	FALSE
1	5245825	5245974	141989	0.565325	1	1.19735	0.93898	0.234738	0.980813	FALSE
1	5248239	5248390	139573	-1.05911	1	-6.05259	0.135502	-0.947685	0.912258	FALSE
1	5248538	5248728	139235	-0.914714	1	-0.591332	0.989793	-0.269145	0.978587	FALSE
1	5252921	5253042	134921	0.874542	1	-0.05614	0.998934	-0.133509	0.990744	FALSE
1	5255071	5255369	132594	-0.987289	1	0.829517	0.91958	0.404644	0.933041	FALSE
1	5258584	5258662	129301	1.22371	1	3.08108	0.262923	0.795095	0.918611	FALSE
1	5262938	5262992	124971	-1.3974	1	-0.592126	1	-2.16411	0.831696	FALSE
1	5263047	5263247	124716	-2.71902	1	-3.32944	0.376837	-1.42342	0.808599	FALSE
1	5265402	5265552	122411	-0.255569	1	0.722478	0.979734	-2.32328	0.521721	FALSE
1	5271760	5271903	116060	-3.75569	1	-0.892926	0.971894	0.272137	0.974987	FALSE
1	5277454	5277625	110338	-1.52492	1	-2.74535	1	-0.893513	0.908307	FALSE
1	5284689	5284788	103175	0.389235	1	0.342174	0.994985	0.236009	0.983942	FALSE
1	5285093	5285289	102674	2.05334	1	1.12007	0.864535	1.8422	0.417883	FALSE
1	5290314	5290476	97487	0.638042	1	-1.02693	0.966505	-0.642968	0.935417	FALSE
1	5313039	5313260	74703	0.603286	1	-0.55124	0.986691	-0.394031	0.955954	FALSE
1	5316892	5317043	70920	0.437954	1	0.00996635	0.999378	-0.279233	0.960709	FALSE
1	5318295	5318343	69620	-1.22873	1	-0.565135	1	1.27143	0.8601	FALSE
1	5320556	5320663	67300	-3.39063	1	0.56889	0.989186	-1.12774	0.868514	FALSE
1	5326898	5327028	60935	-4.83982	1	0.156175	0.998617	1.0378	0.836525	FALSE
1	5333414	5333472	54491	-0.288168	1	0.962866	0.977324	-0.637665	0.948287	FALSE
1	5335146	5335196	52767	-2.95875	1	0.941041	1	-2.04366	0.81102	FALSE
1	5338291	5338413	49550	-0.300245	1	1.02053	0.975015	-0.0699912	0.996164	FALSE
1	5338699	5338732	49231	-4.55521	1	-2.68325	1	-0.0548815	0.997459	FALSE
1	5339362	5339441	48522	-3.18015	1	-5.05775	1	-0.383383	0.978466	FALSE
1	5345530	5345681	42282	0.43466	1	0.287493	0.995305	1.41767	0.790352	FALSE
1	5346044	5346103	41860	0.237195	1	-4.82259	1	-0.646689	0.953525	FALSE
1	5350599	5350670	37293	-0.23979	1	0.94746	0.960245	0.155933	0.986675	FALSE
1	5352329	5352397	35566	-0.833612	1	1.5884	1	-1.28146	0.906564	FALSE
1	5362508	5362630	25333	-0.344186	1	-1.54359	0.893804	0.193479	0.984184	FALSE
1	5366719	5366957	21006	-0.88498	1	0.663162	0.97221	-0.387414	0.949534	FALSE
1	5369151	5369263	18700	-5.02625	1	-5.48129	1	-2.75813	0.735637	FALSE
1	5370696	5370889	17074	0.186478	1	1.5484	0.91203	-2.26676	0.685067	FALSE
1	5380244	5380290	7673	-4.77183	1	-1.95976	1	-2.09584	0.867066	FALSE
1	5391215	5391328	-3243	-3.30512	1	0.199749	0.998617	-1.43529	0.853972	FALSE
1	5393942	5394013	-5970	-4.6919	1	-0.938185	1	-0.827371	0.947686	FALSE
1	5395835	5395980	-7863	-1.26523	1	-0.752723	1	-2.08341	0.715041	FALSE
1	5406515	5406633	-18543	-4.07944	1	0.271543	1	-1.39893	0.90252	FALSE
1	5407922	5408123	-19950	-1.67135	1	-1.55654	0.937502	-3.44661	0.509235	FALSE
1	5408207	5408285	-20235	-0.0567404	1	-0.176679	1	-5.25177	0.428441	FALSE
1	5409762	5409921	-21790	-1.91409	1	0.221848	0.998176	-2.63731	0.600243	FALSE
1	5421292	5421441	-15957	-1.58069	1	-1.52828	1	-2.65278	0.64211	FALSE
1	5423798	5424054	-13344	0.69728	1	-0.885437	0.954239	-1.40423	0.70721	FALSE
1	5426898	5427164	-10234	-0.0605458	0.957838	-0.287628	0.984224	0.399759	0.878672	TRUE
1	5427206	5427343	-10055	-4.2277	1	-0.652166	1	-3.99743	0.426628	FALSE
1	5442155	5442324	4757	0.470957	0.660276	-0.0825693	0.998617	0.81901	0.689313	FALSE
1	5452083	5452193	-11959	-3.78591	1	0.715666	1	0.39866	0.974647	FALSE
1	5456542	5456623	-7529	-1.67556	1	-0.816764	1	-0.750029	0.950262	FALSE
1	5456663	5456743	-7409	-3.1093	1	0.441967	1	-2.78103	0.731811	TRUE
1	5498339	5498469	6120	-3.92788	1	0.562185	0.987703	0.108852	0.991557	FALSE
1	5505452	5505593	-3579	-4.96946	1	-0.0405821	1	-0.918476	0.905438	FALSE
1	5519255	5519428	5043	-1.59796	1	-0.0863972	0.998725	-0.292811	0.974387	FALSE
1	5549892	5550016	3756	-1.28345	1	0.0939849	0.998725	-1.91162	0.704434	FALSE
1	5553825	5553903	7689	-0.293754	1	-2.17414	1	3.44774	0.52632	FALSE
1	5555147	5555254	9011	-0.600028	1	-4.1586	1	-1.5909	0.84642	FALSE
1	5564075	5564137	17939	1.73378	1	0.846853	1	-0.300597	0.985026	FALSE
1	5568785	5568887	22649	-2.44464	1	-0.262997	1	-1.48572	0.828132	FALSE
1	5574057	5574184	27921	-0.515627	1	-0.983315	0.964823	0.0784703	0.993692	FALSE
1	5574297	5574338	28161	0.546968	1	0.895324	1	-0.489947	0.970636	FALSE
1	5578556	5579077	-29431	0.948839	0.196453	-0.00313568	0.999521	-0.52375	0.82483	FALSE
1	5586394	5586641	-21867	0.38837	0.720811	-0.391009	0.976938	0.602545	0.808654	FALSE
1	5588996	5589247	-19261	-1.63332	0.163147	-0.755529	0.926243	0.0967291	0.986508	FALSE
1	5600362	5600613	-7895	0.602596	1	-1.05524	0.914845	0.0186593	0.998038	FALSE
1	5615513	5615813	7005	0.35855	0.727753	-0.158319	0.994104	-0.651984	0.776659	FALSE
1	5617289	5617420	8781	1.36654	1	-0.0948649	0.998725	-2.22092	0.617262	FALSE
1	5622929	5623157	14421	-0.280979	1	-0.221167	0.993355	-0.287209	0.94934	FALSE
1	5625923	5626001	17415	-5.00308	1	-0.170122	1	-0.667362	0.943665	TRUE
1	5628431	5628537	19923	-0.127011	1	-1.49597	0.94079	-0.112476	0.993253	FALSE
1	5628752	5628936	20244	0.634978	1	1.27743	0.808986	0.41841	0.942404	FALSE
1	5634090	5634644	-24428	-0.796259	0.431309	0.123563	0.995859	0.576302	0.836266	FALSE
1	5636424	5636702	-22370	0.317417	1	-0.143451	0.995888	-0.886332	0.775352	FALSE
1	5638978	5639083	-19989	-1.78183	1	-0.903387	1	-0.692762	0.939041	FALSE
1	5643828	5643931	-15141	-1.84503	1	0.610866	1	-0.650711	0.955218	FALSE
1	5646786	5646880	-12192	-4.5177	1	0.122303	1	-0.995685	0.92545	FALSE
1	5646962	5647018	-12054	0.301659	1	1.63563	1	-4.09333	0.584666	FALSE
1	5676251	5676549	17179	-1.27976	1	-0.221975	0.994104	-0.0661385	0.991982	FALSE
1	5684291	5684413	25219	0.346172	1	0.392312	0.992942	-0.417099	0.957675	FALSE
1	5704040	5704385	44968	-0.276112	0.835509	0.268924	0.989828	0.266136	0.945129	FALSE
1	5707206	5707289	48134	-1.78051	1	0.031692	1	-0.0380912	0.997777	FALSE
1	5710223	5710651	51151	0.643788	0.474034	-0.159951	0.994104	-0.112202	0.978589	FALSE
1	5718454	5718548	59382	-0.634742	1	0.851285	0.972302	-0.895264	0.894719	FALSE
1	5720319	5720562	61247	1.64686	0.0367126	-1.12838	0.599446	0.153577	0.971303	FALSE
1	5725159	5725417	66087	0.479438	1	-0.380448	0.987265	-0.360612	0.940801	FALSE
1	5731491	5731571	64826	-5.16125	1	0.552971	1	-1.63865	0.790321	FALSE
1	5750605	5750755	45642	-0.699482	1	0.940629	0.968862	0.307745	0.973696	FALSE
1	5750914	5750995	45402	0.932203	1	-0.569586	1	-2.09882	0.761794	FALSE
1	5755918	5755990	40407	0.660301	1	1.43134	1	0.694735	0.937774	FALSE
1	5756029	5756164	40233	-0.440912	1	-0.631188	0.985687	-1.77689	0.689227	FALSE
1	5759222	5759420	36977	1.50445	1	-1.17219	0.94133	0.916383	0.868374	FALSE
1	5762639	5762919	33478	0.937946	1	-0.159735	0.995888	0.706929	0.855989	FALSE
1	5768021	5768176	28221	1.27664	1	0.0918793	0.998725	0.241019	0.971187	FALSE
1	5771138	5771226	25171	-1.08549	1	-0.74985	1	-0.667372	0.944244	FALSE
1	5771580	5771631	24766	-4.72369	1	-5.17873	1	-2.37538	0.853268	FALSE
1	5773424	5773758	22639	0.153701	1	0.139472	0.995888	0.787092	0.789223	FALSE
1	5777207	5777331	19066	-1.64874	1	1.85036	0.725002	-0.605051	0.936016	FALSE
1	5781199	5781572	14825	-0.373223	1	0.962419	0.876262	0.290903	0.95631	FALSE
1	5785558	5785672	10725	-3.21695	1	-2.78885	1	-1.94105	0.778553	FALSE
1	5786885	5786988	9409	-0.866518	1	-0.527693	1	-1.15112	0.897471	FALSE
1	5788172	5788290	8107	-1.19145	1	-5.00953	1	-2.83426	0.674815	FALSE
1	5788336	5788525	7872	1.41705	0.236004	0.841466	0.92106	0.358349	0.944454	FALSE
1	5808387	5808435	-11990	1.36837	1	1.37461	1	1.07706	0.917717	FALSE
1	5811116	5811192	-14719	-2.62972	1	3.37335	1	1.94599	0.804595	FALSE
1	5818662	5818975	-22265	0.378165	0.745874	0.459399	0.96966	-0.248222	0.950711	FALSE
1	5826178	5826682	-29781	0.718882	0.44314	0.670974	0.889552	0.699121	0.759298	FALSE
1	5829199	5829369	-32802	0.147613	1	-6.02853	0.12478	-1.3812	0.843003	FALSE
1	5832989	5833100	-36592	-0.523482	1	0.0987676	0.998725	-2.30954	0.738329	FALSE
1	5838979	5839087	-42582	-2.51232	1	-4.44173	1	-2.14878	0.747368	FALSE
1	5841592	5841892	-45195	-1.39244	1	0.136966	0.996925	-1.72082	0.433315	FALSE
1	5849441	5849533	-53044	-1.78049	1	-2.71661	1	-1.18936	0.899042	FALSE
1	5856014	5856066	-51496	-2.08353	1	0.75038	1	0.565567	0.967119	FALSE
1	5856123	5856239	-51323	0.209581	1	-2.71551	1	-1.29625	0.860475	FALSE
1	5858273	5858543	-49019	-0.469786	1	-2.59877	0.207132	-0.144666	0.982884	FALSE
1	5862403	5862538	-45024	1.10242	1	0.610958	0.987202	0.915839	0.888028	FALSE
1	5863585	5863753	-43809	-0.658512	1	0.738403	0.981654	0.143741	0.988674	FALSE
1	5863794	5863980	-43582	-1.23035	1	-0.207679	0.99838	-1.11092	0.881901	FALSE
1	5867490	5867573	-39989	0.373085	1	0.0285934	0.999325	-0.163444	0.98754	FALSE
1	5870023	5870098	-37464	1.29085	1	0.337568	0.994266	-4.10571	0.432379	FALSE
1	5870327	5870571	-36991	-0.515341	1	-0.97847	0.972046	-1.43801	0.812951	FALSE
1	5882943	5883199	-24363	-3.68207	1	0.621074	0.965022	-0.113861	0.985927	FALSE
1	5887127	5887381	-20181	-0.837943	1	-0.968269	0.961124	-1.14977	0.835025	FALSE
1	5898671	5899004	-8558	-0.023547	1	-0.1509	0.997182	-0.586916	0.906276	FALSE
1	5899156	5899247	-8315	-1.17792	1	-1.07703	1	-1.98315	0.803128	FALSE
1	5903131	5903249	-4313	-1.84036	1	0.574782	0.992942	0.0952288	0.994779	FALSE
1	5913376	5913805	5814	0.803151	0.438726	1.01658	0.715165	0.198182	0.964366	FALSE
1	5917707	5917872	10145	-3.05525	1	0.191218	0.996772	-2.80812	0.396382	FALSE
1	5920078	5920353	12516	1.45899	0.122231	0.628095	0.943414	0.973193	0.66624	FALSE
1	5922162	5922277	14600	2.47763	1	1.29556	0.881552	0.125054	0.989445	FALSE
1	5926922	5927016	-15434	-2.27603	1	0.184427	1	-3.03469	0.598525	FALSE
1	5927142	5927547	-14903	0.206123	0.826705	0.54761	0.877022	0.125555	0.96981	FALSE
1	5929560	5929874	-12576	-0.837103	1	0.310422	0.990542	-0.610035	0.872437	FALSE
1	5929926	5929993	-12457	-5.27793	1	-1.53054	1	-0.979932	0.92568	FALSE
1	5936371	5936510	-5940	-0.230093	1	0.37198	0.994104	-2.02282	0.690285	FALSE
1	5955135	5955360	6506	-0.381178	1	-0.255748	0.992942	0.770065	0.824004	FALSE
1	5959577	5959670	-7376	-4.47202	1	-4.92705	1	-2.12337	0.878771	FALSE
1	5959704	5959833	-7213	-1.75505	1	-5.74433	1	-6.0117	0.320747	FALSE
1	5970188	5970276	3142	-0.967866	1	0.17288	1	0.362283	0.980034	FALSE
1	5996896	5996968	29850	-0.26372	1	-5.52602	1	-1.32921	0.8679	FALSE
1	5998027	5998083	30981	-0.711519	1	-1.56058	1	-2.68983	0.819395	FALSE
1	6004418	6004496	37372	-1.39601	1	1.01534	1	-5.6445	0.313044	FALSE
1	6006653	6006774	39607	-1.0611	1	-1.93955	1	-0.858596	0.929478	FALSE
1	6010938	6011129	43892	-2.96909	1	0.367591	0.992942	-3.61447	0.198509	FALSE
1	6014212	6014526	47166	-0.847219	1	-1.01616	0.943414	-0.0166517	0.998309	FALSE
1	6017780	6017831	50734	0.539813	1	0.366524	1	-3.46812	0.686316	FALSE
1	6023380	6023483	56334	-1.56925	1	-3.18674	1	-2.89136	0.601543	FALSE
1	6031782	6031849	64736	1.96152	1	-3.03019	0.819344	0.734904	0.942238	FALSE
1	6033866	6033931	66820	-4.7224	1	-5.17743	1	-0.591945	0.96821	FALSE
1	6036927	6037081	69881	-5.83195	1	-1.4936	1	-1.50296	0.841897	FALSE
1	6039729	6039848	72683	-1.10078	1	0.064028	1	-0.300164	0.980252	FALSE
1	6044204	6044311	77158	-1.00516	1	-1.12104	1	0.239214	0.986094	FALSE
1	6047604	6047735	80558	0.27919	1	-2.13243	0.854929	-0.453931	0.966991	FALSE
1	6047835	6047988	80789	0.0118672	1	-5.15859	1	-1.02723	0.919703	FALSE
1	6050282	6050472	-83108	0.742086	1	0.696893	0.98528	-0.823994	0.915317	FALSE
1	6055656	6055711	-77869	-4.66959	1	-0.292708	1	-1.65264	0.876939	FALSE
1	6063448	6063632	-69948	-2.86243	1	-2.07642	0.786963	-0.111999	0.992227	FALSE
1	6066413	6066522	-67058	-5.71736	1	-6.17239	1	-3.9634	0.564582	FALSE
1	6071048	6071120	-62460	-4.57875	1	0.189964	1	-0.846601	0.940856	FALSE
1	6072795	6072882	-60698	-1.80573	1	-3.83646	1	-0.687865	0.943655	FALSE
1	6072955	6073016	-60564	-4.28566	1	0.764461	1	-0.410065	0.97593	FALSE
1	6076772	6076985	-56595	-3.60589	1	-2.50918	0.49641	-0.198356	0.981771	FALSE
1	6081365	6081537	-52043	0.0197511	1	-6.55526	0.0776171	-2.05758	0.590834	FALSE
1	6081571	6081642	-51938	0.234589	1	-0.494955	1	-1.38558	0.893866	FALSE
1	6084495	6084573	-49007	0.118481	1	0.125857	1	-1.69839	0.869556	FALSE
1	6090348	6090443	-43137	-2.06938	1	0.972562	0.966655	-0.0812237	0.993997	FALSE
1	6094464	6094690	-38890	-0.304087	1	-0.646797	0.977326	0.0764774	0.992727	FALSE
1	6103298	6103343	-30237	-4.25125	1	0.267464	1	0.418326	0.978287	FALSE
1	6109068	6109285	-24295	0.914112	1	1.27163	0.906425	1.46538	0.741846	FALSE
1	6118951	6119010	-14570	-4.35315	1	-4.80819	1	-1.09753	0.95467	FALSE
1	6124482	6124635	-8945	-1.11459	1	-1.64835	0.878226	-0.0442482	0.997048	FALSE
1	6127416	6127509	-6071	-0.579474	1	0.545215	1	-2.17262	0.816204	FALSE
1	6130238	6130295	-3285	1.56626	1	0.151104	0.998725	-0.0906621	0.99523	FALSE
1	6139237	6139450	5657	-0.932938	1	0.363988	0.990839	-1.1014	0.786745	FALSE
1	6146327	6146409	12747	0.366444	1	-4.80476	1	-0.827698	0.941752	FALSE
1	6149094	6149177	15514	-0.436827	1	-4.00375	1	-0.242845	0.988564	FALSE
1	6157512	6157656	23932	-2.3155	1	0.103326	0.998725	-3.92881	0.461949	FALSE
1	6158873	6158996	25293	1.02471	1	0.938154	0.886944	-0.648499	0.880785	FALSE
1	6164352	6164498	30772	-1.00685	1	0.373591	0.99346	-0.420062	0.958587	FALSE
1	6171835	6171888	38255	-1.06268	1	1.84909	0.822447	-0.298627	0.977663	FALSE
1	6174125	6174241	40545	0.916476	1	1.3417	0.929173	-2.31347	0.674937	FALSE
1	6194979	6195044	61399	-1.42083	1	-0.255603	1	-4.61989	0.481289	FALSE
1	6197279	6197375	63699	1.5902	1	-0.0305986	0.999325	0.490169	0.953646	FALSE
1	6199612	6199669	66032	1.19365	1	-2.58263	1	-0.765725	0.939064	FALSE
1	6202901	6203058	69321	-2.66399	1	-1.15836	0.908777	0.20564	0.978982	FALSE
1	6203837	6203904	-69480	-3.34767	1	-0.838692	1	-1.56969	0.900081	FALSE
1	6204213	6204290	-69094	-1.76284	1	0.0687211	1	-2.13542	0.794805	FALSE
1	6205251	6205333	-68051	-0.288095	1	0.43675	1	-2.80748	0.683501	FALSE
1	6223129	6223258	-50126	0.860114	1	-5.14746	1	-1.98791	0.752747	TRUE
1	6233435	6233469	-39915	1.60154	1	-0.670285	1	0.174931	0.991901	FALSE
1	6240693	6240970	-32414	0.12386	1	-0.980638	0.946958	-1.31007	0.763123	FALSE
1	6247843	6248204	-25180	-0.520346	0.701783	0.619825	0.954024	-0.693249	0.840662	FALSE
1	6250702	6250786	-22598	-0.2246	1	-0.301203	1	-1.43096	0.875973	FALSE
1	6259596	6259687	-13697	-5.35729	1	-2.62026	1	-2.35975	0.815961	FALSE
1	6268786	6268995	-4389	0.645036	1	-2.56948	0.601127	-0.0318879	0.99763	FALSE
1	6284655	6284998	11271	0.937261	0.255801	0.57271	0.922009	0.30987	0.923784	FALSE
1	6285359	6285433	11975	-0.690213	1	-0.672362	1	-1.01127	0.910109	FALSE
1	6290197	6290271	16813	-1.63706	1	1.29834	1	-1.10486	0.913042	FALSE
1	6290338	6290416	16954	-3.47042	1	0.316706	1	-0.195258	0.985858	FALSE
1	6293313	6293363	19929	-0.0766296	1	0.752583	1	-0.138363	0.994659	FALSE
1	6299056	6299151	25672	-3.49188	1	-5.42136	1	-1.29273	0.909365	FALSE
1	6310044	6310129	20221	-0.15625	1	-0.490992	1	-0.275301	0.984609	FALSE
1	6313372	6313580	16770	0.103387	1	0.533723	0.987202	-0.921387	0.873119	FALSE
1	6336922	6336998	-6572	-1.56051	1	0.845043	1	-3.92799	0.536502	FALSE
1	6339255	6339293	-8905	0.300651	1	2.70576	1	0.827289	0.930855	FALSE
1	6339327	6339387	-8977	-1.26114	1	1.34597	1	-1.29332	0.914034	FALSE
1	6351558	6351597	-21208	-1.8456	1	-4.82296	1	-3.65806	0.706273	FALSE
1	6354324	6354471	-23974	0.203089	1	-5.3863	1	-0.131396	0.992727	FALSE
1	6366493	6366542	-36143	-3.74575	1	1.03326	1	-4.46815	0.6055	FALSE
1	6366697	6366789	-36347	0.586936	1	0.397619	0.994104	-1.48393	0.829762	FALSE
1	6373717	6373810	-43367	-4.34189	1	0.333628	1	-0.48557	0.9667	FALSE
1	6377658	6377768	-47308	-5.22294	1	-5.67798	1	-4.48801	0.541725	FALSE
1	6380219	6380307	-49869	-0.347917	1	-6.10145	1	-1.36347	0.85704	FALSE
1	6380539	6380590	-50189	-4.45346	1	-4.90849	1	-1.75593	0.912152	FALSE
1	6385183	6385327	-54833	-4.02179	1	-0.00677251	0.999521	-2.21404	0.677891	FALSE
1	6387409	6387498	-57059	-0.358743	1	1.71013	0.838276	1.28975	0.828963	FALSE
1	6387933	6388023	-57583	-5.0212	1	-5.47623	1	-2.34262	0.810357	FALSE
1	6401350	6401592	-49687	0.86932	1	-0.114839	0.998377	-0.36558	0.939201	FALSE
1	6403383	6403530	-47749	0.423076	1	-0.936696	0.893565	0.297991	0.953503	FALSE
1	6404658	6404923	-46356	0.425199	0.649614	0.142641	0.994266	1.43439	0.187961	FALSE
1	6408153	6408309	-42970	1.12796	1	-0.293734	0.994104	0.621837	0.911159	TRUE
1	6413589	6413770	-37509	-0.273128	1	0.788394	0.970177	-0.466217	0.94653	FALSE
1	6417800	6417929	-33350	-1.49492	1	-5.63076	1	-0.667737	0.947799	FALSE
1	6423348	6423465	-27814	-1.81465	1	0.754051	0.982145	-0.00240758	0.999639	FALSE
1	6431286	6431412	-19867	-5.40429	1	-1.0561	1	-0.177686	0.990614	FALSE
1	6432625	6432757	-18522	-0.505976	1	0.0681675	0.998934	-0.0298813	0.998048	FALSE
1	6437130	6437233	-14046	-2.53225	1	0.743284	1	-0.494302	0.966579	FALSE
1	6442864	6442960	-8319	-0.0969322	1	1.22971	1	-0.69631	0.943124	FALSE
1	6444950	6445041	-6238	0.802244	1	2.82356	0.321202	2.16515	0.553389	FALSE
1	6455910	6456054	4631	-0.629609	1	-1.70857	1	-1.92453	0.82152	FALSE
1	6467242	6467377	15963	-5.32353	1	0.361995	1	-2.24214	0.739526	FALSE
1	6467431	6467551	16152	0.246779	1	-2.37932	0.851772	0.0555218	0.997043	FALSE
1	6469413	6469582	18134	-0.523278	1	-0.0586076	0.998725	-0.287478	0.969126	FALSE
1	6474376	6474439	23097	0.0595384	1	1.7132	0.889651	-0.294949	0.979796	FALSE
1	6477853	6477974	26574	-0.890648	1	-1.8836	1	-3.0149	0.572671	FALSE
1	6481584	6481663	30305	-4.87263	1	-0.894606	1	-0.820238	0.944481	FALSE
1	6483732	6483780	32453	-1.74848	1	-0.443074	1	-0.885695	0.940173	FALSE
1	6492608	6492655	41329	-3.2261	1	-5.1623	1	-2.44211	0.821561	FALSE
1	6492879	6492943	41600	-0.793414	1	-5.03442	1	-0.498834	0.971059	FALSE
1	6497884	6498039	46605	-1.39598	1	-0.725449	0.982656	-1.62229	0.74526	FALSE
1	6498303	6498383	47024	-0.978578	1	-5.85443	1	-1.55438	0.855379	FALSE
1	6501028	6501072	49749	-2.73257	1	-4.65772	1	-1.48198	0.887953	FALSE
1	6501619	6501682	50340	-0.218457	1	-1.22687	1	-1.48849	0.851586	FALSE
1	6503610	6503692	52331	-0.357133	1	-0.0888676	1	-0.931124	0.900199	FALSE
1	6505884	6505975	54605	-5.37607	1	0.343838	1	-1.45961	0.877331	FALSE
1	6525974	6526200	74695	-0.424764	1	-5.04915	0.232022	-1.55813	0.806417	FALSE
1	6527845	6527929	76566	0.707428	1	-0.638292	1	-1.5737	0.795106	FALSE
1	6551964	6552018	-85441	-1.31999	1	-0.460028	1	0.105649	0.994107	FALSE
1	6552127	6552238	-85221	0.784128	1	-0.129849	0.998725	-0.176723	0.986315	FALSE
1	6556086	6556158	-81301	1.35802	1	0.434502	0.994621	-1.64821	0.856416	FALSE
1	6556251	6556494	-80965	0.254798	1	0.248224	0.994621	-0.294871	0.964779	FALSE
1	6557914	6558030	-79429	-2.35013	1	-5.24675	1	0.708043	0.933439	FALSE
1	6566741	6566981	-70478	-0.564848	1	-1.2496	0.787431	0.628438	0.878589	FALSE
1	6576237	6576421	-61038	-1.89809	1	-1.85795	0.742512	-0.344173	0.963783	FALSE
1	6585875	6586015	-51444	-0.198928	1	-0.772647	0.990657	-1.43362	0.886914	FALSE
1	6588139	6588333	-49126	-1.81507	1	-1.09053	0.974549	-2.12601	0.728931	FALSE
1	6590811	6590997	-46462	0.453373	1	0.113338	0.998725	-1.60895	0.835909	FALSE
1	6591865	6591969	-45490	-3.42359	1	-5.34069	1	-0.579729	0.955069	FALSE
1	6595552	6595753	-41706	-0.973359	1	-1.66376	0.893481	-0.762146	0.925428	FALSE
1	6600468	6600555	-36904	0.439798	1	-1.30165	1	-1.48915	0.873021	FALSE
1	6602504	6602560	-34899	-3.1811	1	1.19156	1	-1.34265	0.889772	FALSE
1	6607370	6607476	-29983	0.135158	1	0.460557	0.992942	-0.95395	0.905924	FALSE
1	6611249	6611604	-25855	0.114565	1	-0.185009	0.994266	-1.0781	0.620588	FALSE
1	6617890	6618207	-19252	-1.57464	0.135209	-1.05191	0.771238	-0.443202	0.9083	FALSE
1	6623242	6623436	-14023	-4.84774	1	0.0315837	0.999325	-0.688088	0.946119	FALSE
1	6633345	6633420	-4039	-0.198523	1	-1.17256	1	-0.765018	0.962514	FALSE
1	6640557	6640685	3098	0.220785	1	0.767754	0.980039	0.365455	0.966565	FALSE
1	6656440	6656517	18981	-3.98027	1	-4.43531	1	-1.28204	0.93595	FALSE
1	6666084	6666345	28625	1.3215	0.159684	1.41008	0.383261	0.652267	0.827617	FALSE
1	6674486	6674540	37027	-3.22818	1	-5.16064	1	-2.43894	0.805688	FALSE
1	6679290	6679365	41831	0.010386	1	-5.56487	1	-0.351668	0.979875	FALSE
1	6681271	6681377	43812	0.696438	1	-5.33888	0.273464	-0.674463	0.948953	FALSE
1	6686168	6686276	-44609	1.2054	1	0.217619	1	0.159381	0.990744	FALSE
1	6711154	6711238	-19647	-1.47462	1	-1.25711	1	-1.148	0.9084	FALSE
1	6715833	6715988	-14897	0.67669	1	-1.01607	0.959122	-1.53252	0.750406	FALSE
1	6717931	6717990	-12895	0.0645565	1	1.37172	1	-1.02799	0.91019	FALSE
1	6724409	6724461	-6424	-1.45832	1	1.83823	1	-0.0802448	0.995661	FALSE
1	6727000	6727033	-3852	-1.84279	1	-0.652964	1	-2.58338	0.791792	FALSE
1	6747845	6747884	16960	-0.578666	1	-0.260632	1	-2.09977	0.850901	FALSE
1	6748490	6748576	17605	-4.69938	1	-1.95926	1	-5.42179	0.466961	FALSE
1	6756251	6756329	25366	-0.288071	1	0.724234	1	-0.760743	0.945773	FALSE
1	6757063	6757244	26178	-1.92151	1	0.37246	0.992942	-1.37933	0.785602	FALSE
1	6758489	6758554	27604	-4.86688	1	-0.889693	1	-0.310536	0.982703	FALSE
1	6761872	6761976	30987	-0.999589	1	0.769861	0.977324	-6.36499	0.0930343	TRUE
1	6762910	6763047	32025	-3.47666	1	-2.43991	1	-0.110297	0.992641	FALSE
1	6764114	6764284	33229	-1.19982	1	0.54757	0.984787	-1.34995	0.74786	FALSE
1	6764504	6764587	33619	-0.53582	1	0.705823	1	0.252896	0.984808	FALSE
1	6776971	6777047	46086	-4.98537	1	-2.88986	1	-0.450126	0.97024	FALSE
1	6789757	6789897	-44119	-0.156988	1	0.278305	0.994985	-0.428285	0.957609	FALSE
1	6803378	6803685	-30331	-0.112393	0.943231	-0.256331	0.992942	-0.529846	0.89167	FALSE
1	6815468	6815955	-18061	-1.22446	1	0.28825	0.99402	-1.20603	0.760469	FALSE
1	6839846	6839941	5825	-4.88347	1	-1.72245	1	-0.368668	0.975402	FALSE
1	6843042	6843115	-3305	-3.84906	1	-4.30409	1	-4.57147	0.543955	FALSE
1	6879686	6879781	6058	-3.17351	1	1.14596	1	-2.94015	0.627257	FALSE
1	6905584	6905761	-6158	-3.26472	1	0.346901	0.99487	-1.44501	0.83763	FALSE
1	6907773	6907844	-8347	-4.81408	1	-5.26912	1	-4.10542	0.692629	FALSE
1	6911740	6912014	8126	-0.485119	1	-0.910517	0.971045	-0.795308	0.907201	FALSE
1	6915773	6915908	4232	0.179373	1	0.514187	0.991317	-1.02831	0.891159	FALSE
1	6915942	6916109	4031	-0.544334	1	-1.73798	0.882384	-1.19372	0.868871	FALSE
1	6925028	6925141	-4727	-2.0158	1	1.63933	0.889651	1.07632	0.886734	FALSE
1	6929969	6930336	-9668	0.310607	1	-1.60383	0.533551	-0.6298	0.876358	FALSE
1	6934601	6934807	-14300	-0.0141355	1	-3.1771	0.365934	0.078559	0.99346	FALSE
1	6934918	6935110	-14617	-0.463237	1	-0.951894	0.965022	0.333687	0.96727	FALSE
1	6940531	6940590	13657	-2.85891	1	0.0967708	1	-1.93743	0.853335	FALSE
1	6940631	6940936	13311	0.468795	1	0.817596	0.916686	-0.67724	0.868148	FALSE
1	6951074	6951231	3016	-0.211439	1	-0.127568	0.998725	-0.298767	0.973276	FALSE
1	6958784	6958826	-4537	-3.03797	1	-3.49301	1	-1.35573	0.936212	FALSE
1	6970464	6970865	-3825	0.661124	0.51538	0.326457	0.985272	0.0897987	0.985466	FALSE
1	7000982	7001149	5073	-1.72607	1	-0.929478	0.972579	0.734908	0.917791	FALSE
1	7004032	7004345	8123	0.454892	0.68636	0.706729	0.889539	0.0726582	0.988466	FALSE
1	7005837	7006310	9928	-1.08787	0.303207	-0.176307	0.994316	0.102338	0.984097	FALSE
1	7009773	7009835	8569	-0.830147	1	1.49066	1	0.359005	0.983256	FALSE
1	7014851	7014955	3449	-0.518199	1	-2.76811	1	-1.58735	0.852969	FALSE
1	7031751	7031786	-13347	-4.54489	1	-4.99993	1	-1.45275	0.941962	FALSE
1	7034211	7034476	-15807	1.20687	0.36658	-1.24351	0.82713	-0.853728	0.838257	FALSE
1	7037574	7037848	-19170	-0.476693	1	-0.0318677	0.999253	-0.916487	0.878268	FALSE
1	7038605	7038669	-20201	1.28242	1	0.766866	0.98303	1.55511	0.776654	FALSE
1	7045080	7045318	-26676	-0.594808	1	0.0966585	0.998725	-2.23615	0.575847	TRUE
1	7047296	7047433	-28892	-0.935246	1	-0.351013	0.995888	-5.27358	0.372204	FALSE
1	7048010	7048132	-29606	0.281794	1	-0.252158	0.997881	-0.440843	0.969774	TRUE
1	7051953	7052047	-33549	-2.58952	1	-5.56421	1	-1.6145	0.887256	TRUE
1	7054516	7054649	-36112	-3.70154	1	-0.264318	0.995888	0.190248	0.985127	FALSE
1	7054692	7054742	-36288	0.0314551	1	-0.113008	1	1.2921	0.867062	FALSE
1	7067371	7067593	-48967	-0.984471	1	-1.21896	0.88338	-0.117073	0.9883	FALSE
1	7068296	7068412	-49892	-3.70977	1	-4.16481	1	0.78452	0.938532	FALSE
1	7080015	7080457	-61611	0.364054	0.90508	-0.974858	0.976424	-0.133054	0.991532	TRUE
1	7080725	7080908	-62321	0.777278	1	0.456972	0.983541	0.850205	0.811818	FALSE
1	7089575	7089748	-71171	0.704277	1	0.813832	0.965913	-0.416188	0.95316	FALSE
1	7093472	7093634	-75068	0.42035	1	-1.58247	0.828071	0.958111	0.842439	FALSE
1	7095545	7095811	-77141	0.776726	0.503225	0.984088	0.79135	0.897833	0.719768	FALSE
1	7098507	7098733	-80103	-1.66901	1	-0.155678	0.998617	-2.33259	0.491401	FALSE
1	7101094	7101154	-82690	-2.2042	1	-1.0299	1	-5.36988	0.393071	FALSE
1	7106112	7106454	-87708	0.074015	0.942635	0.534155	0.891085	0.113473	0.973941	TRUE
1	7108664	7108801	-90260	-0.373154	1	2.29621	0.603484	2.80216	0.383485	FALSE
1	7121060	7121106	89038	-3.12056	1	-0.333536	1	-0.519802	0.968999	FALSE
1	7121782	7121928	88216	-1.56403	1	1.45217	0.852251	-1.05166	0.867681	TRUE
1	7121978	7122050	88094	1.83993	1	0.174684	1	0.508125	0.970584	TRUE
1	7125422	7125507	84637	0.77918	1	0.558252	0.992942	-1.5579	0.83679	FALSE
1	7129171	7129392	80752	1.00783	0.364217	0.700728	0.934749	0.951422	0.705996	FALSE
1	7136658	7136865	73279	0.121455	1	-0.0193315	0.999325	1.12365	0.792258	FALSE
1	7142090	7142427	67717	-0.880091	1	0.0270044	0.998975	-1.45177	0.517215	FALSE
1	7146302	7146453	63691	-0.210119	1	0.124758	0.998725	-1.36197	0.82614	FALSE
1	7150162	7150214	59930	-0.322017	1	-1.28706	1	-5.62505	0.372204	FALSE
1	7150865	7151059	59085	-0.149955	1	-0.306908	0.990657	1.0611	0.661111	FALSE
1	7152429	7152634	57510	-0.102538	1	-0.047098	0.998975	-2.75553	0.530163	FALSE
1	7152689	7152786	57358	-1.68924	1	-1.41804	1	-0.851258	0.943951	FALSE
1	7153185	7153231	56913	1.70856	1	-1.15849	1	-5.03275	0.445239	FALSE
1	7157649	7157807	52337	-2.00173	1	0.688328	0.988137	-0.699417	0.94106	FALSE
1	7158651	7158927	51217	-0.386853	1	-1.28557	0.805251	-0.844265	0.838129	TRUE
1	7159241	7159348	50796	-0.604625	1	-0.744242	0.98526	0.146174	0.989469	FALSE
1	7159617	7159708	50436	-0.965631	1	0.48846	0.992942	0.344584	0.973794	FALSE
1	7159787	7159837	50307	-4.61407	1	-3.56688	1	-1.27823	0.916102	FALSE
1	7160118	7160416	49728	0.487625	0.764296	0.528131	0.9799	1.34606	0.596903	FALSE
1	7169102	7169260	40884	-5.76653	1	-0.104112	0.998725	-1.46732	0.734451	FALSE
1	7178381	7178521	31623	-0.580364	1	-0.381945	0.992942	-2.53276	0.472423	FALSE
1	7180244	7180334	29810	2.02773	1	-3.56819	1	2.16027	0.77828	FALSE
1	7188264	7188350	21794	-0.182579	1	0.411854	0.992942	-0.0445273	0.997012	FALSE
1	7193748	7193839	16305	1.12302	1	-1.4131	1	-1.12989	0.920928	FALSE
1	7201644	7201778	8366	0.899567	1	2.76259	0.586902	-2.36051	0.803532	FALSE
1	7339616	7339790	-3138	-2.3824	1	0.716726	0.982643	1.68776	0.686316	FALSE
1	7344453	7344540	-7975	-1.99211	1	-5.5425	1	-1.39828	0.856765	FALSE
1	7346606	7346770	-10128	-1.08343	0.678605	-1.26141	0.951364	0.47882	0.960524	FALSE
1	7348703	7348936	-12225	-0.0931158	0.94415	-0.222159	0.992754	-0.460962	0.885171	FALSE
1	7350105	7350195	-13627	-1.80414	1	-0.906275	0.968095	0.772084	0.896221	FALSE
1	7360090	7360167	11901	0.525389	1	1.40214	1	0.0532254	0.997317	FALSE
1	7363372	7363462	8606	0.304889	1	-0.441302	1	-0.0529412	0.997445	FALSE
1	7365331	7365416	6652	-2.56392	1	-5.52516	1	-4.33864	0.500998	FALSE
1	7367301	7367474	4594	0.420597	1	-1.06019	0.950713	-0.584832	0.93463	FALSE
1	7380108	7380243	-8040	-1.60016	1	0.174572	0.998725	-2.16318	0.747688	FALSE
1	7390586	7390781	-18518	-0.186587	1	-2.49099	0.516281	-1.25617	0.806962	FALSE
1	7396930	7396982	20402	1.21495	1	-2.00568	1	-2.1626	0.82841	FALSE
1	7410031	7410123	7261	0.0275199	1	-0.515057	1	-1.95145	0.836569	FALSE
1	7410732	7410774	6610	1.81721	1	-1.27451	1	-0.149986	0.992795	FALSE
1	7437133	7437223	10235	-1.61881	1	-1.07834	1	-1.15892	0.88658	FALSE
1	7439259	7439416	12361	0.11087	1	0.0545686	0.998737	-0.875811	0.876676	FALSE
1	7444488	7444669	12181	-1.06643	1	0.390401	0.992942	-0.667826	0.919804	FALSE
1	7450360	7450491	6359	-5.4759	1	0.64767	0.987202	-1.62577	0.778309	FALSE
1	7473314	7473368	-16290	0.0314574	1	-4.97314	1	-1.75668	0.870807	FALSE
1	7476251	7476459	-19227	-0.689357	1	-0.698037	0.988282	0.300834	0.978206	FALSE
1	7478825	7478980	-21801	-1.09538	1	-0.904637	0.978502	-0.949155	0.901256	FALSE
1	7513673	7513770	-5366	1.23121	1	0.65852	1	0.620274	0.94846	FALSE
1	7517695	7517979	-9388	1.30908	1	-2.61111	0.315833	1.03346	0.759834	FALSE
1	7518514	7518661	-10207	-1.6661	1	0.243177	0.995888	-0.333034	0.970322	FALSE
1	7521012	7521056	-12705	-1.0797	1	0.12231	1	-0.0730707	0.996438	FALSE
1	7522557	7522609	-14250	0.347209	1	0.109669	1	-1.844	0.853838	FALSE
1	7523365	7523432	-15058	0.970075	1	0.445039	0.994266	0.0518593	0.997407	FALSE
1	7525740	7525857	-17433	0.588347	1	-1.51008	0.800612	-0.0883404	0.991529	FALSE
1	7527852	7528013	-19545	-1.59016	1	0.249272	0.992942	0.565948	0.875335	FALSE
1	7531419	7531614	-23112	-1.10086	1	-1.68927	0.852883	0.0287958	0.997744	FALSE
1	7534881	7535065	-26574	-1.09876	1	-1.56328	0.863361	-0.857885	0.895595	FALSE
1	7537711	7537801	-29404	-1.1508	1	1.38094	1	-4.97951	0.424756	FALSE
1	7539548	7539615	-31241	-0.273341	1	1.4515	1	-0.605998	0.951684	FALSE
1	7549344	7549409	-41037	1.56403	1	-0.332297	1	-0.465176	0.968844	FALSE
1	7551295	7551367	-42988	-0.751769	1	1.30076	0.937323	-0.983947	0.899695	FALSE
1	7551406	7551508	-43099	-1.76675	1	-0.705451	1	-1.43684	0.816149	FALSE
1	7557045	7557141	-48738	-1.80354	1	0.0787989	1	-4.09486	0.551599	FALSE
1	7562908	7563046	-54601	-0.663235	1	-5.60695	0.152133	0.508973	0.953921	FALSE
1	7570965	7571040	-49729	0.646637	1	-0.831817	1	-1.6626	0.817187	FALSE
1	7573300	7573371	-47398	-4.76576	1	-1.61552	1	-1.47449	0.887154	FALSE
1	7577721	7577778	-42991	-4.44433	1	1.0751	1	-3.70951	0.668337	FALSE
1	7579973	7580169	-40600	-1.67218	1	-0.82598	0.983633	-2.31755	0.655105	FALSE
1	7582963	7583109	-37660	0.138262	1	-0.124173	0.998725	-1.80545	0.71573	FALSE
1	7588221	7588304	-32465	-1.31191	1	0.527491	1	-1.66138	0.816627	FALSE
1	7593791	7593864	-26905	-1.63116	1	-5.04696	1	0.293689	0.979986	FALSE
1	7595983	7596110	-24659	-1.17086	1	0.14434	0.998725	-1.17489	0.841154	FALSE
1	7614779	7614845	-5924	-3.59454	1	1.06188	1	-0.0493197	0.997478	FALSE
1	7641675	7641751	10960	-3.27205	1	0.382383	1	-1.23424	0.881858	FALSE
1	7654896	7655052	24181	-1.70791	1	-6.02102	1	-2.21768	0.771166	FALSE
1	7670586	7670644	39871	-3.25722	1	1.3975	1	-0.491656	0.980319	FALSE
1	7672083	7672172	41368	-4.90182	1	-5.35686	1	-2.22573	0.853338	FALSE
1	7672314	7672461	41599	-0.299198	1	-1.58208	0.913017	-0.387842	0.969126	FALSE
1	7674691	7674824	43976	-0.180817	1	-2.88934	0.581999	-1.86643	0.722268	FALSE
1	7683126	7683305	52411	-0.611042	1	0.201072	0.998285	-0.523829	0.954299	FALSE
1	7699668	7699717	44908	0.949856	1	1.51268	1	-0.517717	0.975762	FALSE
1	7703363	7703430	41195	-1.89604	1	-0.465889	1	0.0350165	0.997768	FALSE
1	7704904	7705068	39557	1.22551	1	-0.277965	0.994266	0.196517	0.979207	FALSE
1	7713889	7714095	30530	-0.161424	1	0.589309	0.98528	-0.275895	0.974119	FALSE
1	7716943	7717024	27601	-0.0927607	1	-0.672811	1	-0.732953	0.957675	FALSE
1	7719822	7719939	24686	0.464432	1	-3.93873	1	-1.61519	0.841242	FALSE
1	7734445	7734583	10042	-1.70209	1	-0.280076	0.997393	-0.622937	0.955831	FALSE
1	7734638	7734865	9760	-2.68006	1	-0.631076	0.982069	-0.14289	0.986536	FALSE
1	7753178	7753313	-4647	0.199124	1	-0.643819	0.986339	-0.503826	0.951131	FALSE
1	7765123	7765178	7163	-0.0165083	1	-0.38644	1	-1.995	0.825222	FALSE
1	7782931	7783049	24971	-2.41331	1	-6.23765	1	-1.0557	0.893349	FALSE
1	7783883	7784136	25923	-1.1121	1	0.4932	0.984721	-0.328497	0.957129	FALSE
1	7786947	7787036	28987	-2.52567	1	1.27015	1	0.573906	0.949945	FALSE
1	7787965	7788071	30005	-0.0161462	1	-0.919165	1	-0.234522	0.983872	FALSE
1	7791998	7792056	-32586	0.0402199	1	1.65489	1	-4.83333	0.458713	FALSE
1	7794000	7794197	-30445	-0.16015	1	0.6552	0.981628	-0.332568	0.965708	FALSE
1	7797820	7797944	-26698	0.0979175	1	-1.5808	0.889651	-0.278175	0.976815	FALSE
1	7804892	7805040	-19602	-0.452467	1	1.2599	0.747706	1.11014	0.705271	FALSE
1	7807094	7807238	-17404	-0.924321	1	0.149093	0.998725	-0.600365	0.938554	FALSE
1	7810613	7810714	-13928	-4.96817	1	0.311194	1	-0.179559	0.988564	FALSE
1	7816327	7816383	-8259	-4.91486	1	-5.3699	1	-3.19438	0.697086	FALSE
1	7818968	7819063	-5579	-3.07928	1	-2.44776	1	-2.2508	0.769562	FALSE
1	7819141	7819301	-5341	-2.75736	1	-0.793638	1	-1.49709	0.851374	FALSE
1	7841088	7841233	3867	-0.481117	1	-0.454394	0.992942	-1.04114	0.892707	FALSE
1	7843020	7843128	5799	-1.05266	1	-1.11005	0.974441	-1.99651	0.756661	FALSE
1	7855158	7855361	4139	0.769132	1	-0.0576105	0.998913	0.219345	0.980732	FALSE
1	7914217	7914421	-3403	-1.69365	1	0.921818	0.948198	-0.326623	0.963783	FALSE
1	7922512	7922685	4682	-3.37689	1	0.715912	0.974441	-0.870004	0.873322	FALSE
1	7923738	7923841	5908	-2.33134	1	-0.537013	1	-1.00894	0.902995	FALSE
1	7924065	7924246	6235	-1.53253	1	0.170604	0.997182	-0.636452	0.913056	FALSE
1	7955677	7955919	6911	0.194417	0.880372	-0.0544164	0.998725	1.41953	0.346249	FALSE
1	7959141	7959516	3314	-0.495221	1	0.519884	0.972111	-1.66063	0.40895	FALSE
1	7959683	7959757	3073	-0.800411	1	-0.126044	0.998617	0.215769	0.9771	FALSE
1	7971682	7971798	-3061	1.3658	0.100085	0.130524	0.995448	1.54557	0.253472	FALSE
1	7974764	7974840	-3579	0.320131	1	-1.44496	0.88852	-1.6385	0.720563	FALSE
1	7983991	7984089	5572	-5.3148	1	-2.47151	1	-1.9817	0.789502	FALSE
1	7986059	7986121	7640	-0.534829	1	-5.34188	1	-4.17548	0.560517	FALSE
1	7987094	7987151	8675	-0.649768	1	-1.48762	1	-0.478979	0.972113	FALSE
1	7987613	7987651	9194	-1.52424	1	-1.06616	1	-0.863565	0.946597	FALSE
1	7989985	7990068	11566	-2.26127	1	-2.82588	1	-0.697867	0.94984	FALSE
1	7990643	7990757	12224	-5.06427	1	-0.555369	1	-0.495156	0.965715	FALSE
1	8017710	8017820	7530	-2.40415	1	0.820504	0.948985	0.448651	0.936498	FALSE
1	8020442	8020891	10262	-0.35953	0.683388	0.0768789	0.997431	0.304637	0.907214	FALSE
1	8024621	8024740	14441	-5.289	1	0.664239	0.992614	-2.02635	0.805411	FALSE
1	8046482	8046558	36302	0.924454	1	0.151149	1	1.03674	0.896979	FALSE
1	8064773	8064896	54593	0.95723	1	0.371798	0.994985	-0.0657941	0.996694	FALSE
1	8065222	8065426	55042	0.381111	1	-0.259493	0.994541	-0.971854	0.839761	FALSE
1	8067474	8067559	57294	-0.82931	1	-4.2326	1	0.670178	0.957736	FALSE
1	8081908	8082170	44758	0.725644	1	-0.0424883	0.998725	-0.399381	0.925104	FALSE
1	8082492	8082657	44271	0.247947	1	-0.479429	0.992942	-2.34082	0.624016	FALSE
1	8091982	8092032	34896	-0.898569	1	-3.71604	1	0.591193	0.973069	FALSE
1	8093408	8093476	33452	-1.72064	1	1.52477	1	-1.04778	0.908095	FALSE
1	8093613	8093726	33202	0.154747	1	0.548929	0.990657	-0.765932	0.924984	FALSE
1	8102563	8102687	24241	0.583335	1	-5.53776	1	-1.20584	0.87121	FALSE
1	8107521	8107705	19223	-5.6099	1	0.210929	0.996492	-0.0226836	0.998048	FALSE
1	8112100	8112342	14586	-0.717708	1	-0.717505	0.982643	0.355425	0.96617	FALSE
1	8116614	8116888	10040	-0.173424	1	1.29219	0.871268	0.137916	0.987501	FALSE
1	8136656	8136730	-9728	-0.415106	1	-1.63225	1	-0.541369	0.97107	FALSE
1	8140276	8140373	-13348	-2.05793	1	-2.25806	1	-4.04143	0.463975	FALSE
1	8144825	8144976	-17897	-4.7865	1	0.403103	1	-5.50891	0.347551	FALSE
1	8163845	8163982	-36917	0.539275	1	0.529147	0.992614	-0.0255608	0.99816	FALSE
1	8168480	8168544	-41552	1.06672	1	-4.84835	1	-2.0981	0.774482	FALSE
1	8174628	8174673	-47700	0.876554	1	0.240243	1	0.284787	0.982754	FALSE
1	8180529	8180602	53189	-4.01228	1	-1.19096	1	-3.30214	0.749465	FALSE
1	8180719	8180825	52966	-0.290835	1	-0.810014	0.98526	-3.16138	0.515661	FALSE
1	8204857	8204916	28875	-4.34045	1	0.494905	1	-2.64772	0.728206	FALSE
1	8212041	8212136	21655	-2.54206	1	1.1804	0.961753	-0.555566	0.95515	FALSE
1	8217311	8217425	16366	1.12783	1	-1.39388	0.94935	-1.5505	0.828435	FALSE
1	8222965	8223157	10634	-6.05809	1	0.209343	0.996984	-1.31515	0.809501	FALSE
1	8250031	8250123	-16240	-1.72431	1	1.77275	0.784883	0.212115	0.982695	FALSE
1	8287001	8287113	-5066	0.70525	1	-1.3152	0.943813	-0.0451108	0.997202	FALSE
1	8306247	8306372	4220	-1.63574	1	0.41668	0.994104	-1.5226	0.826345	FALSE
1	8311156	8311356	9129	-0.839617	1	0.239753	0.995888	-0.394841	0.961566	FALSE
1	8313252	8313477	-7131	1.52544	0.0414871	0.425566	0.969027	1.65593	0.124139	FALSE
1	8316596	8317023	-3585	-0.378149	0.701484	0.976104	0.558551	0.416323	0.876918	FALSE
1	8327372	8327491	6731	-3.75753	1	0.577069	1	-0.693293	0.933772	FALSE
1	8329498	8329549	8857	-3.02996	1	-4.96192	1	-0.664789	0.963664	FALSE
1	8333372	8333465	12731	-4.53988	1	0.513438	1	-3.82728	0.572671	FALSE
1	8336819	8337364	16178	0.308326	0.788843	0.152121	0.994342	0.201163	0.958179	FALSE
1	8344837	8345044	24196	0.217293	1	-0.940263	0.974451	-2.04437	0.671358	FALSE
1	8358590	8358784	37949	-1.29384	1	-0.470646	0.990701	-0.587521	0.933946	FALSE
1	8360555	8360737	-37557	-2.67553	1	-6.135	1	-1.22602	0.887256	FALSE
1	8371845	8372013	-26281	-5.79733	1	-3.09168	1	-1.70926	0.821214	TRUE
1	8383305	8383367	-14927	-3.97172	1	0.219551	1	-3.23709	0.740725	FALSE
1	8388636	8388687	-9607	0.604768	1	1.06509	1	0.664994	0.955069	FALSE
1	8390709	8390832	-7462	-1.3339	1	-0.00126306	0.999933	0.329907	0.977661	FALSE
1	8394300	8394343	-3951	-4.54531	1	-0.547527	1	-0.813449	0.939898	FALSE
1	8401486	8401535	3180	-4.59923	1	-0.610185	1	-1.92157	0.869052	FALSE
1	8404411	8404568	6105	-1.07368	1	0.598105	0.982558	0.100871	0.990706	FALSE
1	8407107	8407182	8801	-4.81716	1	1.71318	0.911154	-2.54352	0.695859	FALSE
1	8412084	8412279	8241	0.0695766	0.927159	0.0198982	0.998725	1.07514	0.110581	FALSE
1	8485661	8485855	-7135	-1.31589	1	-0.126263	0.998725	-1.98397	0.573483	FALSE
1	8488424	8488570	-9898	-0.149805	1	0.407201	0.994104	-1.66703	0.8032	FALSE
1	8493234	8493309	-14708	-4.59143	1	0.0135144	1	0.451626	0.970089	FALSE
1	8493567	8493702	-15041	-2.43964	1	-0.692401	0.987202	-1.09169	0.885171	FALSE
1	8498103	8498318	13200	-0.0712043	0.963177	0.171737	0.994621	-0.581934	0.86399	FALSE
1	8499309	8499412	12106	-2.86214	1	-0.682604	1	-0.799795	0.93232	FALSE
1	8503846	8503903	7615	0.179915	1	-0.975625	1	0.0665403	0.99693	FALSE
1	8521679	8521727	6759	0.255657	1	0.0798945	1	-5.01727	0.482575	FALSE
1	8525384	8525465	-9072	-0.000142083	1	-1.86164	1	-1.92716	0.821975	FALSE
1	8530337	8530636	-3901	-0.182475	1	-0.425574	0.990831	-0.973535	0.850441	FALSE
1	8562046	8562237	3595	0.584273	1	-0.952416	0.970254	0.464094	0.953122	FALSE
1	8570803	8570860	-4971	0.561735	1	-2.26629	1	-5.80779	0.399371	FALSE
1	8574634	8574774	-8802	-2.49884	1	0.832447	0.979928	-0.112812	0.992297	FALSE
1	8577753	8577930	-11921	-2.50203	1	-0.067045	0.998725	-0.630851	0.929436	FALSE
1	8577967	8578097	-12135	-2.41632	1	0.254311	1	-4.2099	0.522888	FALSE
1	8581870	8581910	-11825	-0.56897	1	-0.630906	1	-1.17165	0.923895	FALSE
1	8588869	8589055	-4680	0.0984211	1	-1.20565	0.953528	-0.904581	0.903482	FALSE
1	8598642	8598893	-4716	2.34239	0.000914228	0.143098	0.994621	0.707317	0.744849	TRUE
1	8599938	8600194	-5798	0.906472	1	-1.49344	0.712287	0.326352	0.954314	TRUE
1	8602379	8602519	-3473	0.411195	1	-0.439256	0.987703	-0.0334602	0.997048	FALSE
1	8610380	8610479	4388	0.120482	1	-0.500253	0.985753	0.374562	0.951103	TRUE
1	8611700	8611882	5708	-0.694488	1	-0.361185	0.992942	0.0160256	0.998329	TRUE
1	8613092	8613180	7100	-2.63946	1	-2.43365	1	-1.72572	0.784108	TRUE
1	8625414	8625622	19422	-1.34738	1	-0.794461	0.97727	-0.956628	0.87979	FALSE
1	8631757	8631963	25765	-0.206805	1	-0.269871	0.994985	-3.85597	0.25579	FALSE
1	8653316	8653479	47324	-0.628851	1	-2.23292	0.759263	-2.14838	0.657234	FALSE
1	8656840	8656890	50848	-0.153407	1	-4.9699	1	-3.80618	0.732917	FALSE
1	8656938	8657008	50946	-1.33073	1	-0.476126	1	-5.16672	0.445678	FALSE
1	8659513	8659582	53521	0.934418	1	0.259195	1	-0.23481	0.986316	FALSE
1	8667727	8667877	61735	-4.3471	1	-0.705507	0.982643	-1.36428	0.799969	FALSE
1	8671293	8671362	65301	1.31455	1	0.5462	0.991943	-1.48944	0.830704	FALSE
1	8675476	8675841	69484	-1.08989	1	-0.824507	0.964351	-0.948211	0.847605	FALSE
1	8682028	8682116	76036	-3.59163	1	-4.04666	1	0.347744	0.984743	FALSE
1	8682165	8682274	76173	0.789275	1	-4.8045	1	-0.673038	0.953919	FALSE
1	8688705	8688894	82713	-0.331043	1	0.245245	0.995624	-0.328574	0.96826	FALSE
1	8695218	8695321	89226	2.98421	1	1.93621	0.91958	2.32902	0.734165	FALSE
1	8707818	8708012	93957	-0.38666	1	-0.369734	0.993891	0.0413866	0.997202	FALSE
1	8711311	8711519	90450	-0.328835	1	-0.435945	0.992942	-0.320678	0.973941	FALSE
1	8718505	8718594	83375	-0.504383	1	-1.19913	1	-1.71464	0.813662	FALSE
1	8740110	8740200	61769	0.138906	1	-0.54643	0.992942	-1.5731	0.84185	FALSE
1	8740326	8740381	61588	1.88643	1	1.95639	0.774414	1.12994	0.866568	FALSE
1	8751932	8752007	49962	0.882479	1	-5.13875	1	-5.40612	0.324184	FALSE
1	8756460	8756554	45415	-1.76672	1	-1.94457	1	-2.84753	0.777826	FALSE
1	8757023	8757127	44842	0.067088	1	-0.297032	1	-1.52177	0.835705	FALSE
1	8757478	8757530	44439	-4.84275	1	0.816226	1	-1.0746	0.933991	FALSE
1	8761048	8761102	40867	1.76945	1	-3.72211	1	1.97101	0.791908	FALSE
1	8764210	8764345	37624	-4.99303	1	-0.867102	1	-2.72154	0.690009	FALSE
1	8769600	8769805	32164	0.799194	1	0.142987	0.997182	0.962057	0.772188	FALSE
1	8773667	8773896	28073	0.322048	1	-0.411074	0.992942	-1.58659	0.720848	FALSE
1	8773947	8774017	27952	-0.825776	1	-0.694101	1	-1.45531	0.88355	FALSE
1	8776253	8776341	25628	0.698562	1	-0.824937	0.980039	-0.0440728	0.997202	FALSE
1	8776802	8776876	25093	-3.49211	1	-5.42138	1	-2.24558	0.807212	FALSE
1	8780281	8780372	21597	-1.37735	1	-1.90862	1	-1.63274	0.903482	FALSE
1	8782127	8782218	19751	0.214946	1	-0.25038	0.995624	-1.33852	0.800311	FALSE
1	8787867	8788161	13808	-2.05809	1	-0.92312	0.957464	-2.87195	0.318732	FALSE
1	8790177	8790238	11731	-4.28915	1	0.851891	1	0.831402	0.932456	FALSE
1	8791345	8791410	10559	0.983541	1	-1.67043	1	0.488609	0.966817	FALSE
1	8791448	8791585	10384	-1.88292	1	-1.51163	1	-0.627068	0.948958	FALSE
1	8798431	8798502	3467	-4.48097	1	-4.93601	1	-5.20338	0.501648	FALSE
1	8805302	8805390	-3199	0.491276	1	-0.215866	0.998617	-0.137188	0.992015	FALSE
1	8830015	8830232	12857	0.77308	1	0.843287	0.866019	2.02298	0.124872	FALSE
1	8831231	8831383	11706	-3.44828	1	0.0562979	1	-2.65333	0.749394	FALSE
1	8839184	8839441	3648	-0.141376	1	-0.562329	0.982033	-0.868667	0.850915	FALSE
1	8850002	8850167	-6913	0.366084	1	-0.285661	0.994914	1.66844	0.665841	FALSE
1	8864879	8864922	-8179	-5.13668	1	-1.63793	1	-4.42749	0.620588	FALSE
1	8864997	8865051	-8050	-0.000419229	1	-1.66187	1	-0.699994	0.950359	FALSE
1	8866770	8866859	-6242	-0.475861	1	-0.250822	1	-3.07801	0.641516	FALSE
1	8880328	8880378	7227	-5.24064	1	-5.69567	1	-5.96304	0.820852	FALSE
1	8883963	8884116	10862	0.0971008	1	-0.11336	0.998725	0.261576	0.9719	FALSE
1	8891409	8891700	18308	0.560637	0.7119	0.103038	0.998617	-0.591907	0.897156	FALSE
1	8901642	8901722	28541	-0.0513254	1	-3.96953	1	-0.345363	0.979504	FALSE
1	8904111	8904174	31010	-2.59228	1	0.39715	1	-1.07055	0.923427	FALSE
1	8908575	8908661	35474	-5.22319	1	-3.37515	1	-1.67452	0.889271	FALSE
1	8915756	8915813	29781	1.18176	1	-5.22598	1	-2.5041	0.793727	FALSE
1	8919455	8919519	26075	-1.04346	1	-2.36589	1	-2.09033	0.862133	FALSE
1	8920074	8920136	25458	-5.48076	1	0.0187673	1	-6.20317	0.243161	FALSE
1	8938690	8938822	6772	1.37366	1	0.650342	0.988332	0.314146	0.976582	FALSE
1	8938863	8938990	6604	0.643594	1	-1.37988	0.948484	0.31865	0.976546	FALSE
1	8973795	8973866	-5181	-1.15767	1	-4.72202	1	-1.54626	0.884082	FALSE
1	8990132	8990253	-21518	1.28395	1	-1.21509	0.872452	1.93174	0.399371	FALSE
1	8993746	8993899	-25132	1.51551	1	0.262317	0.992942	1.55921	0.388143	FALSE
1	8995637	8995740	-27023	1.43407	1	1.34227	0.920393	1.04976	0.873693	FALSE
1	9012603	9012849	-43989	0.466298	1	-0.286526	0.990879	1.21676	0.553072	FALSE
1	9026717	9027015	-58103	-2.96846	1	0.311734	0.99402	-1.81968	0.583778	FALSE
1	9031161	9031257	-62547	-1.6182	1	-4.44646	0.400057	0.127384	0.991625	FALSE
1	9036738	9036806	-68124	0.133364	1	-2.1848	1	0.829069	0.912456	FALSE
1	9053618	9053805	78959	0.199126	1	-1.19211	0.960199	-1.10322	0.880779	FALSE
1	9057032	9057194	75570	-1.40989	1	-0.128758	0.998725	-0.346572	0.972203	FALSE
1	9061702	9061850	70914	-0.311207	1	0.0685593	0.998725	-1.66365	0.676038	FALSE
1	9062811	9062903	69861	1.77711	1	1.05848	0.950713	0.856574	0.895428	FALSE
1	9065224	9065283	67481	-4.53192	1	-0.769915	1	-0.401975	0.981119	FALSE
1	9065445	9065553	67211	-0.6644	1	-0.441554	0.994342	-0.124704	0.993141	FALSE
1	9069245	9069428	63336	-0.863228	1	0.695247	0.977324	-1.56744	0.69838	FALSE
1	9076311	9076524	56240	0.273356	0.832544	-0.0940852	0.99838	0.296639	0.939064	FALSE
1	9076696	9076753	56011	-0.816353	1	-0.699313	1	-0.039328	0.997768	FALSE
1	9080322	9080391	52373	-4.62405	1	-5.07909	1	-0.542769	0.970352	FALSE
1	9084909	9084963	47801	-2.71027	1	-4.58102	1	-1.35928	0.935645	FALSE
1	9087775	9087834	44930	0.0754076	1	-4.88534	1	-0.869248	0.947948	FALSE
1	9111208	9111252	21512	1.13438	1	-5.13201	1	0.410914	0.967024	FALSE
1	9113735	9114040	18724	0.0741002	1	1.43914	0.636314	0.7028	0.865738	FALSE
1	9122174	9122270	10494	0.0490845	1	1.36724	0.931526	-1.28644	0.857932	FALSE
1	9124544	9124656	8108	-1.87877	1	0.704138	1	-2.69136	0.599369	FALSE
1	9136963	9137192	-4199	-1.48073	1	0.464033	0.991485	-0.263337	0.977227	FALSE
1	9139573	9139848	-6809	-4.05295	1	0.523597	0.995448	-0.782852	0.961657	FALSE
1	9142879	9142955	-10115	1.59973	1	-1.60729	1	-0.796811	0.933209	FALSE
1	9145061	9145169	-12297	-1.44525	1	-5.57755	1	-0.840284	0.935818	FALSE
1	9146384	9146443	-13620	-4.23562	1	-4.69066	1	-1.14829	0.93442	FALSE
1	9146535	9146583	-13771	-4.5559	1	-1.41314	1	-0.670204	0.959662	FALSE
1	9159670	9159743	14635	-1.30849	1	0.999778	0.981628	-0.175744	0.990074	FALSE
1	9162373	9162420	11958	-4.22151	1	-2.10136	1	-0.871345	0.947818	FALSE
1	9162572	9162804	11574	1.32015	1	0.228093	0.994104	1.14476	0.669723	FALSE
1	9189529	9189723	11486	-2.98533	1	-0.143085	0.998725	-3.75	0.310983	FALSE
1	9190981	9191047	10162	-1.73122	1	-0.197912	1	-0.929657	0.916438	FALSE
1	9193231	9193342	7867	0.00974439	1	1.03492	1	-1.04378	0.91476	FALSE
1	9208323	9208476	5437	-1.08252	1	-2.91673	1	-2.4898	0.632556	FALSE
1	9235998	9236177	20206	-1.44993	1	-0.912242	0.981628	-0.747851	0.935888	FALSE
1	9244558	9244606	11777	-4.39068	1	-0.0300488	1	-5.11309	0.530844	FALSE
1	9246383	9246445	9938	-1.14443	1	-4.96253	1	-0.0969758	0.994689	FALSE
1	9247744	9247796	8587	-1.49727	1	0.0610328	1	-2.69266	0.755156	FALSE
1	9262460	9262833	-5521	-0.717075	0.616872	0.343821	0.989697	-0.460227	0.919837	TRUE
1	9266127	9266604	-3774	-1.12937	1	0.187671	0.994266	-1.90294	0.277355	TRUE
1	9277316	9277396	-4877	-4.91556	1	-1.15094	1	-3.15914	0.743778	FALSE
1	9327136	9327253	-7102	-1.31739	1	-1.83052	1	0.430322	0.96774	FALSE
1	9339110	9339218	4755	-1.44919	1	0.083961	1	-1.69783	0.796995	FALSE
1	9339259	9339426	4904	-1.08817	1	-0.80816	0.98231	-2.03395	0.687033	FALSE
1	9339542	9339628	5187	-0.466706	1	-4.06372	1	-0.708028	0.95487	FALSE
1	9348118	9348200	13763	-1.92786	1	0.651761	1	-2.60237	0.785191	FALSE
1	9348286	9348598	13931	0.551868	1	-0.0275824	0.999275	-0.147406	0.986094	FALSE
1	9350974	9351068	13335	-0.0191219	1	-1.92903	1	-2.08394	0.72193	FALSE
1	9357736	9357854	6549	-5.72471	1	-1.73075	1	-1.68194	0.778553	FALSE
1	9360229	9360323	4080	0.169628	1	-0.580849	0.990324	0.080872	0.994162	FALSE
1	9373690	9373841	3393	-1.21613	1	-1.52528	1	-2.39599	0.718238	FALSE
1	9375013	9375119	4716	-0.853944	1	-0.319216	0.995888	-0.549651	0.960572	FALSE
1	9393961	9394122	3471	-1.84463	1	0.0857446	0.998725	-0.524413	0.900215	FALSE
1	9406966	9407139	8599	-0.0672225	1	-1.5825	0.934128	0.339357	0.97608	FALSE
1	9414163	9414463	-11629	-2.65645	1	-0.664651	0.976424	-0.138679	0.986028	FALSE
1	9417188	9417386	-8706	-0.407806	1	0.267894	0.994323	-0.574382	0.92251	FALSE
1	9438558	9438657	4214	-1.36235	1	-0.992082	0.957404	-1.12612	0.835878	FALSE
1	9439595	9439701	-3351	-4.07148	1	-1.31638	1	-3.2	0.630592	FALSE
1	9449758	9449867	4961	1.13213	1	0.815385	0.974549	-4.25559	0.400381	FALSE
1	9457819	9458017	13022	-2.59818	1	0.496039	0.985394	0.884847	0.844125	FALSE
1	9464913	9465020	20116	-3.66697	1	-5.55037	1	-0.114011	0.992293	FALSE
1	9476739	9476907	31942	-0.836385	1	-0.517059	0.992942	-1.38995	0.860811	FALSE
1	9482497	9482596	37700	-3.062	1	-2.15971	1	-4.73224	0.418377	FALSE
1	9486560	9486654	41763	0.82841	1	0.863531	0.979547	-0.375671	0.970443	FALSE
1	9498832	9498978	-38479	-1.29783	1	-1.04275	0.963391	-1.67247	0.739276	FALSE
1	9508541	9508750	-28707	-1.69701	1	-0.52241	0.991009	-1.94669	0.69139	FALSE
1	9512115	9512253	-25204	-4.28774	1	1.07404	0.92035	-1.84087	0.603493	FALSE
1	9512416	9512515	-24942	0.630135	1	0.139864	0.998725	-0.637234	0.938513	FALSE
1	9515473	9515639	-21818	-4.55632	1	-3.51816	1	-2.2546	0.598334	FALSE
1	9545399	9545541	6682	-5.05922	1	-5.51426	1	-4.34761	0.521479	FALSE
1	9554447	9554501	15730	-5.09701	1	-1.69582	1	-0.894754	0.938742	FALSE
1	9556067	9556138	17350	0.291494	1	-1.22132	1	-4.30745	0.485967	FALSE
1	9561049	9561105	22332	-4.47182	1	-4.92686	1	-5.19423	0.540174	FALSE
1	9566372	9566534	22080	-0.818757	1	1.39848	0.800612	0.35474	0.95718	FALSE
1	9566610	9566747	21867	-0.514058	1	0.467649	0.990657	-0.309764	0.969767	FALSE
1	9581364	9581468	7146	-5.08685	1	-1.3405	1	-4.37493	0.502365	FALSE
1	9593875	9593936	-5261	-1.42485	1	-2.68975	1	0.0343707	0.99829	FALSE
1	9593991	9594105	-5377	0.207029	1	-5.20921	1	-0.897408	0.923895	FALSE
1	9594734	9594806	-6120	-0.758577	1	-3.02865	1	-4.17714	0.584681	FALSE
1	9595546	9595762	-6932	-4.4422	1	1.06544	0.971894	0.464641	0.963664	FALSE
1	9595840	9595939	-7226	-2.9376	1	1.47425	0.92487	0.25839	0.981968	FALSE
1	9604939	9605215	-7701	-0.5716	1	0.148753	0.9968	-0.540436	0.9084	FALSE
1	9645426	9645511	11448	-4.85602	1	0.543028	1	-0.839371	0.924947	FALSE
1	9646463	9646590	12485	-1.60174	1	-0.319222	0.995448	-0.675378	0.94076	FALSE
1	9646683	9646867	12705	-1.66732	1	0.503234	0.986741	-0.728407	0.897149	FALSE
1	9646975	9647142	12997	-0.57415	1	-0.73693	0.98303	-2.56161	0.515661	FALSE
1	9656248	9656334	6862	-2.17503	1	-0.0896467	1	2.66441	0.648388	FALSE
1	9667231	9667437	-4010	-0.151182	0.904573	-0.928251	0.759486	0.0703783	0.9883	FALSE
1	9675755	9675914	-3695	-0.962552	1	0.0436323	0.999272	-2.94141	0.586075	FALSE
1	9685087	9685142	5478	-1.11736	1	-5.23301	1	-3.01964	0.7878	FALSE
1	9685224	9685384	5615	-0.258563	1	0.954418	0.944166	-0.431059	0.950535	FALSE
1	9690079	9690215	-4380	0.981013	1	0.310893	0.995595	0.127065	0.991781	FALSE
1	9699594	9699851	4999	-0.647775	1	1.29838	0.791788	-1.14429	0.774482	FALSE
1	9700842	9700952	6247	-0.924163	1	-0.695875	0.987493	-2.28776	0.665891	FALSE
1	9704124	9704405	9529	-0.559291	1	-0.638249	0.975479	-0.695491	0.889937	FALSE
1	9706734	9707048	12139	-1.94332	1	-0.392574	0.995888	-0.28925	0.985558	FALSE
1	9714672	9714743	20077	-4.81526	1	0.424159	1	-0.684529	0.960785	FALSE
1	9719706	9719802	25111	0.186985	1	0.595332	0.988615	0.503528	0.953557	FALSE
1	9720304	9720369	25709	-0.532175	1	-1.8001	1	-5.67466	0.362714	FALSE
1	9727725	9727870	33130	-0.675938	1	-0.658682	0.988853	1.73374	0.706134	FALSE
1	9737842	9738030	43247	0.0811632	1	0.493505	0.985394	-1.02839	0.81518	FALSE
1	9738745	9738830	44150	-2.56471	1	-3.06564	1	-0.127364	0.992606	FALSE
1	9740939	9741107	46344	-0.0547095	1	0.0736797	0.998725	-1.72039	0.747368	TRUE
1	9748337	9748546	40973	-0.234837	1	-0.41833	0.983121	-0.0454803	0.994115	FALSE
1	9759369	9759422	30097	0.191492	1	-1.32291	1	-2.45818	0.82025	FALSE
1	9760877	9761090	28429	1.75377	1	0.719818	0.946011	0.481906	0.913976	FALSE
1	9773464	9773618	15901	0.911768	1	1.16609	0.916863	1.0444	0.841064	FALSE
1	9779612	9779694	9825	-1.61836	1	-1.0428	1	-2.74896	0.680701	FALSE
1	9783156	9783420	6099	-0.278425	1	-0.0248715	0.999322	-1.75778	0.570467	FALSE
1	9803022	9803186	-13503	-2.02735	1	-1.14805	0.967938	-1.42935	0.837841	FALSE
1	9803453	9803507	-13934	1.06214	1	0.645779	0.992614	-1.05162	0.917706	FALSE
1	9805692	9805777	-16173	-0.629893	1	-0.170153	0.998725	-2.4137	0.687033	FALSE
1	9809308	9809407	-19789	1.2902	1	2.54895	0.753349	0.303305	0.982123	FALSE
1	9810742	9810877	-21223	-3.7859	1	2.095	0.853374	0.595321	0.957326	FALSE
1	9819056	9819285	-29537	-0.449676	1	0.477081	0.986339	0.411623	0.944455	FALSE
1	9843429	9843588	-53910	-0.00247892	1	1.82711	0.449606	0.391318	0.946284	FALSE
1	9849280	9849501	-59761	-0.245342	1	-0.384065	0.992942	-1.25565	0.783159	FALSE
1	9853872	9853985	-64353	-1.91814	1	0.26557	1	-1.02623	0.917248	FALSE
1	9857067	9857131	-67548	-1.12793	1	0.262669	1	-3.94709	0.589832	FALSE
1	9864519	9864643	71591	-1.02144	1	-0.274244	0.994621	0.812795	0.888076	FALSE
1	9871253	9871292	64942	-4.01063	1	-4.46566	1	-3.30173	0.787571	FALSE
1	9879033	9879387	56847	-0.982819	1	0.811536	0.887971	-0.893262	0.757452	FALSE
1	9884769	9885000	51234	-1.43241	1	1.32651	0.774516	-0.686424	0.892218	FALSE
1	9888205	9888308	47926	-2.43983	1	-1.16085	1	-2.66657	0.665319	FALSE
1	9893441	9893600	42634	0.0947025	1	-0.34789	0.994621	-2.10648	0.699445	FALSE
1	9893662	9893735	42499	0.203181	1	2.1027	1	-1.00864	0.930855	FALSE
1	9895113	9895152	41082	-3.8075	1	0.705833	1	-3.09806	0.794625	FALSE
1	9897504	9897555	38679	-3.84406	1	-5.71834	1	-2.0041	0.853938	FALSE
1	9930884	9930981	5253	0.268127	1	-1.00086	0.974441	-1.61854	0.795454	FALSE
1	9931200	9931354	4880	-0.408294	1	-0.273213	0.9968	-3.17304	0.522542	FALSE
1	9932084	9932266	3968	-0.892813	1	-0.357277	0.994342	-1.05889	0.881085	FALSE
1	9932424	9932607	3627	0.537653	1	0.83317	0.96886	-0.395988	0.957736	FALSE
1	9932670	9932927	3307	-0.911705	1	0.614629	0.982123	-0.11571	0.989524	FALSE
1	9950354	9950581	6056	-0.150973	1	-0.533466	0.986606	0.202474	0.979504	FALSE
1	9950764	9950895	5742	0.325177	1	0.168615	0.998617	-0.352733	0.967785	FALSE
1	9951565	9951747	4890	1.54321	1	-0.893516	0.912631	2.07398	0.188964	FALSE
1	10007849	10008127	7965	-1.31037	1	0.169311	0.995652	1.32902	0.567337	FALSE
1	10015290	10015369	15406	-1.65038	1	-0.942824	1	-4.58472	0.519976	FALSE
1	10015408	10015538	15524	0.852719	1	-1.92152	0.812219	-0.0518584	0.996694	FALSE
1	10020542	10020659	-15524	-1.84665	1	-0.141654	0.998617	-0.107142	0.990706	FALSE
1	10022178	10022320	-13863	0.211787	1	0.664587	0.975479	-1.31581	0.752517	FALSE
1	10022492	10022707	-13476	0.146074	1	-0.00945024	0.999378	0.961505	0.772614	FALSE
1	10025586	10025695	-10488	1.4012	1	-4.80316	0.327189	0.845528	0.916602	FALSE
1	10026024	10026093	-10090	0.780006	1	-1.02697	0.974441	-0.110709	0.992727	FALSE
1	10053682	10053799	17499	-2.51937	1	0.582171	0.992754	-1.85362	0.803376	FALSE
1	10062064	10062176	-25187	-5.3049	1	0.73838	0.980587	-1.10641	0.860404	FALSE
1	10065909	10066010	-21353	0.290853	1	-0.447828	0.992942	0.336133	0.969767	FALSE
1	10066059	10066370	-20993	0.529927	0.683255	1.01144	0.795406	0.289367	0.949919	FALSE
1	10066435	10066597	-20766	0.100959	1	0.276533	0.994266	0.394559	0.951779	FALSE
1	10067909	10067956	-19407	-4.90831	1	-0.942551	1	-1.89205	0.860491	FALSE
1	10073559	10073697	-13666	0.98512	1	0.910266	0.962176	-0.424761	0.955825	FALSE
1	10091400	10091682	3772	-1.73244	1	0.851001	0.95121	-1.48871	0.685328	FALSE
1	10096797	10096886	9169	-0.398073	1	-5.72317	1	-1.77108	0.829862	FALSE
1	10099402	10099496	11774	0.745822	1	-3.1226	0.629948	0.370866	0.971307	FALSE
1	10099677	10099747	12049	-3.78634	1	-4.24137	1	-1.51977	0.905589	FALSE
1	10102938	10102994	15310	-4.13137	1	-0.154795	1	0.583515	0.963063	FALSE
1	10109593	10109665	12030	0.876899	1	-2.58408	1	-0.920237	0.935645	FALSE
1	10125671	10125740	-3157	-0.783139	1	0.433038	1	-2.88672	0.546923	FALSE
1	10125796	10125944	-3282	-2.07633	1	0.696956	0.98231	-1.25167	0.831928	FALSE
1	10142280	10142387	-4782	-0.543726	1	-6.14396	1	-0.437731	0.96735	FALSE
1	10145508	10145674	-8010	-1.51521	1	-5.78503	1	-1.80762	0.780435	FALSE
1	10146297	10146344	-8799	-0.0414942	1	-4.63481	1	-4.90218	0.605444	FALSE
1	10150675	10150793	6444	-0.816525	1	-1.01326	0.974549	-1.34366	0.851099	FALSE
1	10175035	10175200	-9195	-1.38842	1	-1.31485	0.815924	-0.425516	0.939064	FALSE
1	10179461	10179536	6594	0.0654292	1	-0.132555	1	0.270679	0.985739	FALSE
1	10181783	10181836	4294	1.53231	1	2.34837	1	1.79409	0.83225	FALSE
1	10181933	10182035	4095	-4.95847	1	1.29221	0.959122	-0.477912	0.965099	TRUE
1	10182196	10182245	3885	4.8786	1	-1.05174	1	1.1235	0.941828	FALSE
1	10182563	10182674	3456	-2.34789	1	0.78597	0.974122	-0.0524283	0.996161	FALSE
1	10212420	10212507	7268	-5.1972	1	-2.04758	1	-1.86322	0.825181	FALSE
1	10213221	10213283	6492	0.579684	1	-4.88679	1	-1.12591	0.921086	FALSE
1	10234337	10234417	-3925	-3.53815	1	-3.91697	1	-5.68192	0.36943	FALSE
1	10241790	10241839	-11378	-4.22172	1	0.152838	1	-4.94413	0.493158	FALSE
1	10246376	10246445	-15964	0.671005	1	3.92099	1	1.3348	0.90132	FALSE
1	10248747	10248917	-18335	-1.42027	1	-0.1239	0.998725	-2.21939	0.7137	FALSE
1	10250643	10250830	-20231	-2.15718	1	-0.0891244	0.998725	-1.65779	0.750585	TRUE
1	10251164	10251195	-20752	-4.06541	1	-4.52044	1	-0.775364	0.963783	FALSE
1	10255396	10255540	-24984	-1.9534	1	-0.443485	0.992927	0.458101	0.95275	FALSE
1	10256060	10256138	-25648	-0.0217586	1	-0.803576	1	-0.651074	0.957322	FALSE
1	10266357	10266441	-35945	-4.71168	1	2.00706	0.641069	-0.299894	0.973694	FALSE
1	10268493	10268689	-38081	-0.604992	1	0.870256	0.969175	-1.52819	0.755148	FALSE
1	10274412	10274487	-44000	-0.367824	1	-5.37656	1	-2.65714	0.804631	FALSE
1	10274551	10274732	-44139	-4.34012	1	-0.167788	0.998617	-2.2734	0.583013	FALSE
1	10279884	10280029	-49472	-0.965914	1	0.324098	0.995305	-1.48796	0.827086	FALSE
1	10280701	10280802	-50289	-5.61413	1	-2.77343	1	-2.33635	0.729015	FALSE
1	10289578	10289856	57954	-2.26089	1	-0.156292	0.998617	-1.10145	0.831368	FALSE
1	10301876	10301987	45823	1.07046	1	1.7033	0.873754	0.14426	0.990385	FALSE
1	10309451	10309724	38086	-4.97175	1	-0.345665	0.992942	-0.850385	0.860404	FALSE
1	10317442	10317829	29981	-0.148358	1	-0.0154083	0.999328	-1.5974	0.552078	FALSE
1	10327757	10327919	19891	-1.46679	1	-1.31134	0.935795	-0.674832	0.930694	FALSE
1	10329119	10329289	18521	0.970592	1	-0.955307	0.980386	-2.88506	0.570594	FALSE
1	10329472	10329575	18235	1.18643	1	-3.08338	1	1.38814	0.872529	FALSE
1	10332259	10332307	15503	-2.55516	1	-5.52401	1	-1.37132	0.898206	FALSE
1	10332551	10332645	15165	-0.692423	1	-1.15751	1	-0.64552	0.955854	FALSE
1	10354302	10354688	-6492	0.234371	0.781713	-0.0290904	0.998725	0.347593	0.875579	FALSE
1	10372543	10372936	5600	0.230454	0.882735	-0.392495	0.985483	-0.0144997	0.998048	FALSE
1	10373344	10373581	4955	-1.00914	1	-0.221426	0.995448	-0.530624	0.931037	FALSE
1	10382830	10382923	-4294	1.23506	1	-4.7234	0.307651	0.838261	0.908774	FALSE
1	10397238	10397299	-5946	-0.206153	1	1.96315	1	-0.558106	0.971854	FALSE
1	10399918	10400092	-8626	1.52682	1	1.21785	0.888221	-0.732436	0.905438	FALSE
1	10416603	10416659	3425	0.468399	1	-4.85905	1	-0.539197	0.968201	FALSE
1	10441061	10441173	17484	-1.17043	1	0.605158	0.985515	-3.34737	0.36698	FALSE
1	10448061	10448186	24484	0.642697	1	-1.09634	0.852251	1.00613	0.742654	FALSE
1	10448475	10448561	24898	-0.0591484	1	-0.768093	1	-2.32779	0.617093	FALSE
1	10448686	10448867	25109	-3.41937	1	0.862138	0.974441	-1.9219	0.67397	FALSE
1	10478372	10478485	54795	-5.29138	1	-5.74642	1	-1.794	0.820493	FALSE
1	10483736	10483984	60159	0.1109	1	1.42232	0.66485	-0.0658357	0.993	FALSE
1	10488059	10488132	64482	-0.461148	1	-1.989	1	-0.583236	0.957736	FALSE
1	10488339	10488440	64762	0.73202	1	1.43688	0.808986	0.0149345	0.998397	FALSE
1	10494783	10495057	71206	-0.777768	1	0.623052	0.960245	-0.287006	0.95487	FALSE
1	10497102	10497183	73525	-1.19697	1	0.508088	1	0.142825	0.990597	FALSE
1	10497748	10497794	74171	1.28591	1	1.23637	1	-4.23197	0.557981	FALSE
1	10500952	10501030	77375	-3.39888	1	0.301456	1	-0.146368	0.990907	FALSE
1	10504794	10504849	81217	-0.446111	1	-2.6712	1	-1.17227	0.900081	FALSE
1	10505303	10505380	81726	-1.47373	1	0.226746	1	-3.44083	0.482223	FALSE
1	10508335	10508502	84758	-1.04455	1	1.07894	0.951765	-1.68417	0.755156	FALSE
1	10510545	10510632	86968	-1.48568	1	-0.461213	1	-1.09195	0.91299	FALSE
1	10523085	10523142	99508	0.281722	1	-0.385048	1	-0.442106	0.971262	FALSE
1	10532643	10532807	109066	-0.181987	1	-1.18771	0.97221	-1.38609	0.868013	FALSE
1	10535304	10535372	111727	-1.53775	1	-4.436	1	-0.896928	0.942353	FALSE
1	10538651	10538736	115074	2.82337	1	1.33848	0.866026	1.95258	0.513227	FALSE
1	10538784	10538840	115207	1.17706	1	-1.70844	0.883998	0.367335	0.967516	FALSE
1	10540871	10541059	117294	-0.226743	1	-0.526934	0.986718	-1.17835	0.796818	FALSE
1	10550756	10550978	127179	-0.032216	1	-0.261464	0.994124	-0.34365	0.955218	FALSE
1	10571708	10571771	116574	-1.64249	1	1.03051	1	-2.27478	0.792643	FALSE
1	10578524	10578617	109728	-2.66842	1	-4.21259	1	-1.16168	0.893987	FALSE
1	10580828	10580892	107453	-0.409872	1	0.332636	1	-6.18545	0.246734	FALSE
1	10590851	10591068	97277	0.0136196	1	-1.96285	0.642433	-2.1844	0.4789	FALSE
1	10594002	10594092	94253	-4.6937	1	0.993911	1	-0.807853	0.940962	FALSE
1	10606090	10606146	82199	-3.59415	1	2.15546	1	-2.86251	0.763005	FALSE
1	10612757	10612831	75514	-2.69991	1	-1.16747	1	-1.36905	0.895368	FALSE
1	10612979	10613064	75281	-0.33349	1	0.30943	1	-1.28223	0.877696	FALSE
1	10618648	10618714	69631	0.889615	1	-4.12154	1	-1.34851	0.913159	FALSE
1	10632537	10632727	55618	-1.73378	1	0.949737	0.969175	-0.221529	0.982438	FALSE
1	10634306	10634468	53877	-2.14263	1	0.0373879	0.999258	-2.03553	0.700239	FALSE
1	10642232	10642283	46062	1.29568	1	0.755927	1	-0.856337	0.923874	FALSE
1	10642550	10642684	45661	-5.41657	1	0.698049	0.984964	-2.13444	0.652572	FALSE
1	10644452	10644511	43834	0.297222	1	1.54559	1	0.817892	0.938553	FALSE
1	10650519	10650605	37740	0.336927	1	-0.0757303	0.998854	-2.22379	0.718639	FALSE
1	10657087	10657181	31164	-0.291469	1	-0.651367	1	-1.56248	0.870417	FALSE
1	10662189	10662351	25994	0.125984	1	0.0664157	0.998725	-0.54438	0.899957	FALSE
1	10664482	10664581	23764	-1.24299	1	-1.63388	1	-1.00191	0.929462	FALSE
1	10678432	10678658	9687	-0.850784	1	-1.09632	0.951118	-1.24602	0.826681	FALSE
1	10683716	10683865	4480	-2.93994	1	-1.15797	1	-3.00751	0.585485	FALSE
1	10684175	10684236	4109	-1.45652	1	-5.62399	1	-0.647487	0.955129	FALSE
1	10696108	10696223	-7761	0.630216	1	0.36363	0.995078	-1.65675	0.832229	FALSE
1	10699514	10699599	-11167	0.139714	1	-0.976776	1	-2.41739	0.804979	FALSE
1	10715923	10715976	-27576	-1.29257	1	0.436702	1	-1.29327	0.88159	FALSE
1	10720984	10721211	-32637	-1.54227	1	0.172293	0.998273	0.0584659	0.995509	FALSE
1	10741356	10741416	-53009	0.370223	1	-4.76425	1	0.632364	0.963664	FALSE
1	10744170	10744397	-55823	0.792067	1	-0.205896	0.994985	0.0328635	0.996945	FALSE
1	10776258	10776360	45963	0.7039	1	1.59707	1	-1.09993	0.907214	FALSE
1	10789551	10789618	32705	-4.60655	1	-0.61438	1	-3.86808	0.696933	FALSE
1	10797226	10797431	24892	-2.35988	1	-1.53074	0.924551	-2.14352	0.682884	FALSE
1	10800201	10800424	21899	-1.03858	1	0.229449	0.995656	-0.736507	0.905503	FALSE
1	10808239	10808288	14035	0.670679	1	-1.30813	1	-3.73431	0.6889	FALSE
1	10808410	10808458	13865	-1.14055	1	-5.52368	1	-5.79106	0.365199	FALSE
1	10808818	10808924	13399	0.666351	1	0.0180826	0.999357	-1.64595	0.784815	FALSE
1	10809675	10809836	12487	0.4075	1	0.806437	0.944285	0.612799	0.896409	FALSE
1	10812146	10812307	10016	-5.94386	1	-0.317907	0.995595	-2.23353	0.678309	FALSE
1	10812433	10812663	9660	-1.14718	1	-0.600701	0.990657	-0.995102	0.90287	FALSE
1	10838517	10838584	-5383	1.06009	1	0.957011	0.98526	-2.99538	0.67808	FALSE
1	10838670	10838816	-5536	-1.4401	1	0.633883	0.974549	-0.0681365	0.993384	FALSE
1	10840638	10840783	-7504	-1.16784	1	1.53785	0.854133	-0.126102	0.990429	FALSE
1	10861773	10861896	-28639	-0.734044	1	-0.745162	0.987202	0.302376	0.978518	FALSE
1	10864111	10864433	-30977	-2.13046	1	-0.887123	0.959122	-3.27332	0.216287	FALSE
1	10865578	10865625	-32444	-3.86491	1	0.24707	1	-4.58732	0.581119	FALSE
1	10866949	10867048	-33815	-1.11226	1	-0.444701	0.994266	-0.37299	0.974812	FALSE
1	10876576	10876649	33335	-3.78629	1	-4.24133	1	0.639117	0.964139	FALSE
1	10887709	10887789	22195	-1.16971	1	-1.05874	1	-0.806267	0.936094	FALSE
1	10895289	10895348	14636	0.0235743	1	0.284017	1	0.0579847	0.997478	FALSE
1	10902668	10902715	7269	0.736957	1	-4.21994	1	-2.08088	0.875335	FALSE
1	10963295	10963395	-7663	-1.55452	1	-0.200028	0.997182	-1.90478	0.655304	FALSE
1	10981433	10981482	8253	-4.65082	1	-5.10585	1	-2.88915	0.837452	FALSE
1	10981704	10981800	8524	-3.99123	1	-0.312803	1	-3.66009	0.590803	FALSE
1	10984678	10984748	11498	-0.738146	1	1.28265	0.972312	-3.95893	0.58461	FALSE
1	10995138	10995339	7386	-0.636109	1	1.76113	0.661955	0.791787	0.886297	FALSE
1	11013546	11013634	8598	-2.59693	1	0.89323	0.982558	-0.721821	0.941991	FALSE
1	11019170	11019310	-5116	0.0793981	1	0.83911	0.876653	0.135387	0.979965	FALSE
1	11034551	11034605	9733	-4.45471	1	-4.90975	1	-0.462512	0.979351	FALSE
1	11038825	11038924	-10669	1.10179	1	-0.389467	0.99338	0.162641	0.986511	FALSE
1	11041447	11041477	-8116	-5.00788	1	-0.226156	1	-2.33264	0.852214	FALSE
1	11043151	11043222	-6371	-1.12034	1	-1.32315	1	-2.07594	0.793433	FALSE
1	11043354	11043461	-6132	-1.34039	1	0.598096	0.990657	-0.561681	0.952885	FALSE
1	11054380	11054448	4760	-4.79828	1	-0.80163	1	-2.07777	0.757301	FALSE
1	11054604	11054735	4984	-1.07523	1	0.903461	0.979928	0.376492	0.971649	FALSE
1	11062544	11062957	12924	-0.559279	1	0.186394	0.994621	-0.847463	0.799214	FALSE
1	11066027	11066085	16407	-3.04334	1	-4.96257	1	-0.611796	0.955691	FALSE
1	11069115	11069375	19495	0.882222	1	0.790776	0.948985	-1.11046	0.769	FALSE
1	11073103	11073240	17236	-0.348061	1	-0.96652	0.974476	-1.08096	0.88281	FALSE
1	11075635	11075738	14738	-2.01579	1	2.93928	0.17546	2.66234	0.335288	FALSE
1	11098702	11098755	-8226	-4.13281	1	1.21071	1	0.785661	0.941289	FALSE
1	11099060	11099129	-8584	-1.26634	1	-0.126272	1	-2.99872	0.486878	FALSE
1	11103401	11103677	-12925	0.329764	1	-3.39083	0.164145	0.0474035	0.995442	FALSE
1	11107282	11107771	-16806	-0.645311	0.603027	-0.231143	0.992942	-0.760596	0.804445	FALSE
1	11107812	11108104	-17336	-2.12634	1	0.307337	0.994104	-2.10759	0.513227	FALSE
1	11114149	11114375	-23673	0.44164	1	-0.0483357	0.998725	0.456643	0.912616	FALSE
1	11122273	11122351	-31797	-0.736239	1	-1.46025	1	-2.80655	0.725201	FALSE
1	11138814	11138970	24583	0.531492	1	0.165273	0.996698	-0.608612	0.905102	FALSE
1	11141209	11141484	22069	0.708063	1	-0.242193	0.994104	-1.03829	0.764753	FALSE
1	11141909	11142126	21427	1.10873	1	-0.630228	0.980039	-0.146731	0.985199	FALSE
1	11145203	11145326	18227	-3.20399	1	-6.10125	1	-1.63937	0.81967	FALSE
1	11145430	11145533	18020	1.79075	1	0.265042	0.995065	-0.284132	0.974011	FALSE
1	11149657	11149816	13737	1.01589	1	-0.0532347	0.998934	-1.48917	0.824286	FALSE
1	11150393	11150453	13100	1.3009	1	0.585998	1	0.142001	0.993783	FALSE
1	11157995	11158114	5439	1.4243	1	1.0399	0.939903	0.611455	0.923838	FALSE
1	11172052	11172108	-8499	2.73137	1	-3.15577	1	-1.98913	0.876751	FALSE
1	11172431	11172512	-8878	-0.795166	1	-5.2807	1	-2.06731	0.802285	FALSE
1	11175839	11175896	-12286	-5.19132	1	0.556795	1	-2.87605	0.58461	FALSE
1	11182240	11182331	9714	0.196801	1	-0.193927	0.997881	0.390832	0.962605	FALSE
1	11202368	11202449	7609	-1.30662	1	-0.858751	1	-2.23417	0.822455	FALSE
1	11204457	11204591	9698	-1.1266	1	-1.81382	1	-0.529843	0.960652	FALSE
1	11204629	11204839	9870	-1.21083	0.248404	-0.405755	0.9799	0.401404	0.907969	FALSE
1	11208933	11209050	14174	-2.00266	1	-2.52885	1	-2.93519	0.59378	FALSE
1	11211563	11211629	14741	-0.0733767	1	0.542514	0.992942	-1.41888	0.859022	FALSE
1	11231088	11231348	-4718	-0.842111	1	0.0496175	0.998831	-0.479789	0.939064	FALSE
1	11238325	11238495	-11955	-1.17822	1	-2.35201	0.785931	-1.46788	0.835532	FALSE
1	11238613	11238713	-12243	-2.51922	1	-3.94365	1	-1.05089	0.923738	FALSE
1	11241707	11241846	-15337	0.156015	1	0.297443	0.994621	-1.52035	0.759403	FALSE
1	11244409	11244477	-18039	-3.42342	1	-0.915379	1	-2.13502	0.808268	FALSE
1	11255589	11255877	-29219	-0.0821723	1	0.137845	0.998553	-0.429691	0.943439	FALSE
1	11256002	11256087	-29632	-0.516767	1	-4.33972	1	-0.349141	0.97447	FALSE
1	11260217	11260325	26209	-0.626187	1	-0.0560902	0.998934	0.741667	0.928404	FALSE
1	11266340	11266521	20013	0.957617	1	0.493693	0.990657	-1.044	0.866755	FALSE
1	11268318	11268445	18089	-3.14972	1	-0.00965255	1	-3.90121	0.55464	TRUE
1	11274944	11275033	11501	-5.06268	1	-5.51772	1	-1.38897	0.899514	FALSE
1	11278425	11278580	7954	-1.63353	1	-0.397124	0.993082	-0.1263	0.990312	FALSE
1	11298998	11299305	8372	0.343628	0.67052	-0.283055	0.979914	1.1078	0.282929	FALSE
1	11299440	11299628	8814	0.713568	0.508119	-0.661026	0.935727	0.755134	0.776091	FALSE
1	11301544	11301874	10918	-0.166405	1	-0.150954	0.998021	-0.850779	0.864251	TRUE
1	11306458	11306612	15832	-1.14529	1	-1.19475	1	-0.731732	0.933488	FALSE
1	11306645	11306806	16019	-0.779983	1	-0.940986	1	-1.35217	0.891769	FALSE
1	11314121	11314191	-8682	2.09186	1	-4.72574	0.366778	-0.412731	0.970189	FALSE
1	11316357	11316598	-6275	-1.39915	1	-0.0781848	0.998725	-0.791831	0.853972	FALSE
1	11338946	11339196	10590	0.0509041	1	0.329362	0.993631	-0.938692	0.863775	FALSE
1	11344254	11344330	-15414	-0.464279	1	0.633331	1	-1.22869	0.898214	FALSE
1	11349052	11349194	-10550	-1.01608	1	0.852037	0.985005	-0.710718	0.944545	FALSE
1	11353826	11353902	-5842	0.575796	1	-1.71158	0.894449	-2.38802	0.632556	FALSE
1	11367816	11367853	5385	-1.05355	1	0.259004	1	-1.25684	0.896221	FALSE
1	11367992	11368249	5561	-2.97924	0.00593781	-0.415866	0.976424	-0.814356	0.731591	FALSE
1	11392613	11392740	7492	0.766904	1	-0.219213	0.995448	-1.4639	0.695654	FALSE
1	11392898	11393032	7777	-1.72816	1	-3.49687	1	-2.08191	0.621252	FALSE
1	11393289	11393460	8168	0.65958	1	1.22314	0.860059	-0.162463	0.983659	FALSE
1	11396019	11396052	10898	-0.163096	1	-2.45377	1	-5.03209	0.477975	FALSE
1	11396435	11396551	11314	-0.462338	1	-1.09233	0.974451	-2.46503	0.658226	FALSE
1	11401314	11401646	16193	-1.28157	1	0.169334	0.995888	-1.07309	0.776332	FALSE
1	11407512	11407603	14813	-0.693526	1	-0.721208	1	-0.86422	0.922996	FALSE
1	11411317	11411412	11004	-3.81524	1	-0.536275	1	-1.79418	0.810278	FALSE
1	11416616	11416847	5569	0.0272817	0.979979	-0.544568	0.894888	0.738665	0.606239	FALSE
1	11417188	11417246	5170	-4.02292	1	-4.47796	1	-0.716873	0.971281	FALSE
1	11427903	11428152	-5487	-2.04592	1	0.795972	0.973345	0.626302	0.924434	FALSE
1	11428279	11428356	-5863	-2.57733	1	0.334327	1	-1.53353	0.802115	FALSE
1	11434215	11434444	5291	0.189372	1	0.964781	0.919559	-0.990677	0.826345	FALSE
1	11444741	11444823	-3506	-3.76969	1	-0.684163	1	0.0379241	0.998048	FALSE
1	11464720	11464788	9559	1.00679	1	1.13078	0.980039	0.31037	0.982877	FALSE
1	11469020	11469147	5200	-0.805386	1	0.385828	0.990657	1.20162	0.731794	FALSE
1	11481021	11481072	-4450	-4.74381	1	-5.19884	1	-4.00698	0.65209	FALSE
1	11514220	11514418	4332	-1.36166	1	-0.355919	0.992942	-0.941139	0.863151	FALSE
1	11516733	11516829	6845	-0.717627	1	0.264612	1	-0.728974	0.945518	FALSE
1	11517000	11517163	7112	-1.72646	1	-2.45475	0.489383	-0.647503	0.917952	FALSE
1	11519190	11519273	9302	-0.526721	1	0.771532	0.982643	-1.81829	0.746587	FALSE
1	11528148	11528196	-13262	2.08807	1	-0.495045	1	-0.163662	0.992905	FALSE
1	11528608	11528710	-12748	-5.16008	1	-0.607135	1	-0.528973	0.960657	FALSE
1	11548065	11548271	3387	-1.65	1	-0.976325	0.904816	-1.85445	0.442777	FALSE
1	11550899	11550974	6221	-0.876181	1	-0.427865	1	-0.700095	0.962793	FALSE
1	11570974	11571075	20181	-0.458941	1	0.583457	0.990208	-0.901782	0.908346	FALSE
1	11583469	11583544	7712	0.107666	1	0.0172441	1	-6.16872	0.237068	FALSE
1	11588221	11588254	3002	-4.41811	1	0.949803	1	-2.69779	0.731849	FALSE
1	11604774	11605255	-3087	-0.257847	0.825977	-0.661389	0.893725	0.484494	0.860649	FALSE
1	11625742	11625886	10619	0.343497	1	0.458866	0.991474	-0.0158807	0.998402	FALSE
1	11628152	11628366	13029	-1.67872	1	0.59119	0.985687	-2.16081	0.551782	FALSE
1	11654811	11654888	5795	-4.91302	1	-2.06936	1	-1.39092	0.876855	FALSE
1	11655680	11655763	-5650	-2.16027	1	-6.10074	1	-1.7699	0.817178	FALSE
1	11673660	11673728	12102	-2.72883	1	-0.516345	1	-1.25555	0.888205	FALSE
1	11674152	11674238	12594	-3.28608	1	0.822812	1	-4.03325	0.50009	FALSE
1	11674923	11674997	13365	-0.359774	1	0.536659	1	-2.85945	0.639583	FALSE
1	11678542	11678635	16984	1.13834	1	0.776697	0.982069	-1.68555	0.784917	FALSE
1	11694650	11694708	11550	0.228662	1	-1.05712	1	1.04963	0.919902	FALSE
1	11694795	11694963	11295	0.561776	0.609209	0.0982681	0.997881	0.670952	0.803364	FALSE
1	11701401	11701490	4768	-4.47339	1	-1.40595	1	-0.439728	0.973005	FALSE
1	11717100	11717227	-6642	0.00513147	1	0.791899	0.987669	-2.31924	0.742844	FALSE
1	11723996	11724045	-13538	-0.95041	1	-1.92063	1	-1.66963	0.872113	FALSE
1	11740397	11740522	-29939	-5.19143	1	-2.0772	0.82713	-0.210032	0.984808	FALSE
1	11743121	11743241	-32663	0.642593	1	0.74173	0.983121	-0.946899	0.898714	FALSE
1	11743689	11743775	-33231	0.316288	1	-0.70899	0.988425	-1.31623	0.868011	FALSE
1	11763177	11763270	-52719	-1.51392	1	-0.730343	0.988213	-0.165103	0.989685	FALSE
1	11764343	11764448	-53885	1.13062	1	1.3315	0.957464	-5.39339	0.32364	FALSE
1	11776463	11776729	-66005	-0.748917	1	0.292727	0.992942	-0.0872256	0.989737	FALSE
1	11785502	11785636	-75044	-0.489555	1	-0.889233	0.971224	-0.498868	0.947443	FALSE
1	11796649	11796824	-86191	-6.0108	1	-2.87344	1	-1.67367	0.825855	FALSE
1	11809636	11810028	-99178	0.0447216	0.964597	0.413985	0.942568	-0.0390011	0.991764	FALSE
1	11812239	11812318	-101781	-0.973011	1	0.139763	1	-0.00726561	0.999286	FALSE
1	11818952	11819152	-108494	0.0125327	1	0.0657094	0.998725	0.290237	0.961566	FALSE
1	11821855	11821900	-111397	-4.19138	1	0.427437	1	-0.253315	0.987936	FALSE
1	11822092	11822371	-111634	0.579389	1	0.832741	0.9266	0.512862	0.911475	FALSE
1	11822603	11822764	-112145	1.1994	1	0.553933	0.978821	0.814277	0.840295	FALSE
1	11823791	11823881	-113333	-3.62669	1	-1.94939	1	-2.75622	0.701152	FALSE
1	11827853	11828001	-117395	0.486543	1	-1.0809	0.949931	-2.45533	0.511388	FALSE
1	11848792	11848854	-137325	-4.63712	1	1.206	1	-0.963262	0.93739	FALSE
1	11860799	11860840	-125339	-0.265146	1	-5.07789	1	-0.283497	0.987419	FALSE
1	11863614	11863685	-122494	-4.8759	1	-5.33093	1	-2.11204	0.85303	FALSE
1	11875120	11875425	-110754	-1.72069	1	-0.0124297	0.999378	-1.05134	0.859022	FALSE
1	11877541	11877646	-108533	-2.70737	1	0.185169	1	-0.673154	0.94121	FALSE
1	11881344	11881414	-104765	-3.05047	1	-0.096373	1	-2.20383	0.834872	FALSE
1	11881810	11881881	-104298	-2.28346	1	-0.152508	1	-3.04663	0.707028	FALSE
1	11889577	11889626	-96553	-4.39103	1	-0.142488	1	-1.03933	0.94106	FALSE
1	11892191	11892332	-93847	-0.613553	1	-0.530318	0.987567	-0.713754	0.908535	FALSE
1	11899664	11899765	-86414	-4.66948	1	0.115703	1	-0.538683	0.970941	FALSE
1	11906019	11906093	-80086	-0.76204	1	2.0716	0.865831	0.01842	0.998819	FALSE
1	11909238	11909416	-76763	-0.267894	1	0.1145	0.998725	-1.56917	0.798757	FALSE
1	11927526	11927673	-58506	-1.21509	1	1.2791	0.912566	-0.294399	0.974344	FALSE
1	11951845	11951951	-34228	-0.232465	1	-0.926955	1	-1.76848	0.771168	FALSE
1	11967274	11967381	-18798	1.5617	1	-0.192912	0.997171	1.35459	0.729015	FALSE
1	12012999	12013123	-21891	0.397529	1	-1.02853	0.975448	-2.1035	0.727409	FALSE
1	12033060	12033171	-41952	-3.35788	1	-0.314778	0.994621	0.117349	0.990842	FALSE
1	12053525	12053581	-23080	-3.88487	1	-0.388966	1	-2.20022	0.860404	FALSE
1	12055595	12055649	-21012	0.303595	1	0.00351768	1	-0.325826	0.981119	FALSE
1	12063430	12063623	-13038	-0.892587	1	0.744152	0.982701	-0.330357	0.973512	FALSE
1	12070424	12070624	-6037	0.830983	1	0.355542	0.990657	0.442181	0.93227	FALSE
1	12070781	12071151	-5510	0.775016	0.222846	0.467057	0.908022	0.603364	0.685032	FALSE
1	12084088	12084173	3570	-5.0532	1	1.51386	1	-1.36583	0.88281	FALSE
1	12093538	12093593	13020	1.12092	1	-0.0640337	1	-4.74021	0.413463	FALSE
1	12094100	12094201	13582	0.555355	1	1.84479	0.668292	0.519764	0.940173	FALSE
1	12096348	12096445	15830	-4.41816	1	1.6608	0.895329	-0.56048	0.955991	FALSE
1	12096804	12096868	16286	-1.99234	1	1.28797	1	1.11013	0.902387	FALSE
1	12099718	12099792	19200	0.77325	1	0.848622	0.976424	-0.0506552	0.996797	FALSE
1	12103603	12104067	23085	0.586717	0.573555	0.434714	0.972589	-0.107421	0.98205	FALSE
1	12106310	12106421	25792	-1.93503	1	-0.887234	1	-1.67773	0.810325	FALSE
1	12107143	12107337	26625	-0.501737	1	0.69094	0.957316	0.0418504	0.995448	FALSE
1	12120544	12120978	40026	0.550497	0.311712	0.3396	0.940702	0.215903	0.915317	FALSE
1	12125867	12126043	-35218	-4.18145	1	0.343138	0.995448	-0.23256	0.985617	FALSE
1	12132191	12132342	-28919	1.98886	0.02236	1.71913	0.167111	0.836153	0.739493	FALSE
1	12137224	12137458	-23803	-0.260131	1	0.49547	0.97854	0.50532	0.905503	FALSE
1	12140323	12140534	-20727	-0.120121	1	-0.275068	0.993718	-0.789132	0.860491	FALSE
1	12146883	12147157	-14104	0.189132	0.905724	1.20081	0.705671	-0.154664	0.978466	FALSE
1	12152317	12152373	-8888	0.530239	1	1.73901	0.831674	0.164874	0.98812	FALSE
1	12169509	12169719	8237	-0.153954	1	0.805243	0.876262	-0.747621	0.806882	FALSE
1	12178784	12178856	17512	-0.879943	1	0.474038	1	-3.5362	0.552078	FALSE
1	12185196	12185367	23924	-0.476275	1	1.36934	0.852715	-0.188365	0.982522	FALSE
1	12192591	12192752	31319	0.20343	1	0.675774	0.983121	-0.348827	0.967748	FALSE
1	12193327	12193552	32055	0.290342	0.837206	0.488477	0.972912	0.165376	0.974387	FALSE
1	12200012	12200077	38740	-5.06936	1	-0.323138	1	-0.0780641	0.996664	FALSE
1	12210721	12211059	-33587	0.756921	0.328699	1.01634	0.458605	0.412817	0.871412	FALSE
1	12218639	12219111	-25535	-0.820352	0.55983	-0.725534	0.950208	-0.2018	0.973069	FALSE
1	12232706	12232778	-11868	-1.1143	1	-0.987875	1	-1.72911	0.862887	FALSE
1	12232924	12233323	-11323	0.338273	0.691713	0.255541	0.984454	0.222813	0.937599	FALSE
1	12255443	12255522	10797	-2.18507	1	0.988482	1	-4.32766	0.592757	FALSE
1	12261000	12261206	16354	-1.10066	1	-1.13763	0.965329	-0.751648	0.929902	FALSE
1	12275520	12275637	30874	0.30628	1	0.225193	0.997035	0.793723	0.912456	FALSE
1	12276505	12276576	31859	-0.79259	1	-0.250856	1	0.146602	0.990293	FALSE
1	12278277	12278331	33631	-4.3623	1	-0.119572	1	-5.08471	0.567209	FALSE
1	12280781	12280828	-35350	0.579015	1	-0.36644	1	-2.01935	0.78003	FALSE
1	12281267	12281517	-34661	0.264257	1	-1.89428	0.668788	-0.434957	0.947948	FALSE
1	12286882	12286960	-29218	-1.52467	1	-1.10649	1	-1.87582	0.822104	FALSE
1	12290116	12290342	-25836	1.65786	1	-0.379998	0.991474	-0.632863	0.907969	FALSE
1	12302070	12302207	-13971	-5.56648	1	-6.02152	1	-1.53244	0.826463	FALSE
1	12330287	12330591	14109	0.707594	1	0.905858	0.883535	-0.215736	0.969658	FALSE
1	12345176	12345230	28998	-3.09784	1	-0.766757	1	-1.01089	0.932437	FALSE
1	12355202	12355340	39024	0.377993	1	0.687427	0.990539	-0.460727	0.969088	FALSE
1	12366523	12366620	-34377	-2.16053	1	-0.456547	0.992942	-0.559267	0.952378	FALSE
1	12374981	12375059	-25938	-0.093627	1	0.0762322	1	-1.68513	0.858694	FALSE
1	12375128	12375416	-25581	0.44438	1	1.0635	0.866097	-0.0396005	0.996302	FALSE
1	12391125	12391318	-9679	-0.362355	1	-1.04909	0.940439	-0.754344	0.897953	FALSE
1	12412157	12412244	11160	-5.06938	1	-1.6673	1	-3.34901	0.621252	FALSE
1	12420195	12420251	19198	0.991568	1	-2.14911	1	-1.52839	0.872784	FALSE
1	12420485	12420569	19488	-1.2448	1	0.679161	1	-2.9042	0.640097	FALSE
1	12422801	12422881	21804	1.22048	1	2.27117	0.322666	0.414538	0.951257	FALSE
1	12426404	12426679	25407	-0.0255942	1	-1.77152	0.583663	-0.644867	0.895501	FALSE
1	12427441	12427551	26444	-3.62221	1	0.782874	0.981929	-0.918348	0.903952	FALSE
1	12447247	12447400	46250	-0.410841	1	1.04984	0.964793	-0.667556	0.936038	FALSE
1	12447622	12447738	46625	0.0265121	1	1.09396	0.971536	-0.811067	0.929558	FALSE
1	12454496	12454730	53499	0.561447	1	1.04173	0.889651	-0.58148	0.913159	FALSE
1	12459139	12459237	57682	0.529465	1	0.15268	0.998725	0.0826055	0.994107	FALSE
1	12459560	12459636	57283	-0.807927	1	1.06131	1	-0.675379	0.959677	FALSE
1	12469042	12469172	47747	-1.80685	1	-3.7795	1	-2.53435	0.622804	FALSE
1	12473874	12473963	42956	-5.33821	1	0.816021	1	-2.63693	0.710367	FALSE
1	12479390	12479613	37306	-0.238924	1	1.55415	0.742177	-0.139989	0.986675	FALSE
1	12482626	12482981	33938	-0.735393	1	0.0794146	0.998725	0.0587219	0.993325	FALSE
1	12483557	12483689	33230	-1.03274	1	-0.345325	0.995448	-1.52674	0.840319	FALSE
1	12484224	12484323	32596	-1.88147	1	-1.10484	0.948198	0.316965	0.970149	FALSE
1	12500911	12500987	15932	-2.08601	1	1.57091	1	-2.84003	0.760487	FALSE
1	12501030	12501096	15823	-2.63356	1	1.95699	1	0.130448	0.995317	FALSE
1	12501149	12501282	15637	-0.16283	1	-0.81304	0.980039	-0.150792	0.988508	FALSE
1	12511797	12511900	5019	0.604862	1	0.352313	0.994104	-0.657157	0.932015	FALSE
1	12511962	12512171	4748	-1.8738	1	1.58574	0.84505	0.589639	0.937528	FALSE
1	12520320	12520397	-3209	0.601513	1	0.800707	0.971723	-0.317116	0.968201	FALSE
1	12523207	12523404	-6096	-0.397009	0.658054	0.134513	0.994266	0.486362	0.822361	FALSE
1	12541282	12541389	-24171	-0.691246	1	-2.05629	1	-1.66146	0.817146	FALSE
1	12541608	12541694	-24497	-4.96663	1	0.316632	1	-1.29219	0.903334	FALSE
1	12558391	12558576	25746	-3.5609	1	0.551335	0.987202	-2.44007	0.484019	FALSE
1	12561381	12561494	22828	0.505986	1	1.098	0.966573	1.68252	0.762576	FALSE
1	12561696	12561867	22455	1.24743	0.0500057	1.17824	0.197941	1.43997	0.101436	FALSE
1	12573284	12573366	10956	-0.207618	1	0.831778	0.972855	-0.756131	0.913835	FALSE
1	12573412	12573580	10742	0.449882	1	-0.12534	0.99776	0.138763	0.981681	FALSE
1	12574007	12574259	10063	-0.00342146	0.997506	0.048337	0.998725	0.152148	0.966391	FALSE
1	12575478	12575523	8799	-0.842001	1	-0.135628	1	-1.26654	0.898292	FALSE
1	12580833	12580904	3418	-1.51405	1	-0.0165388	0.999378	-0.736709	0.924947	FALSE
1	12587426	12587775	-3104	0.950075	0.410093	0.170573	0.994985	0.496456	0.900199	FALSE
1	12589178	12589268	-4856	-0.773039	1	-2.29927	0.697085	-1.09828	0.860073	FALSE
1	12592466	12592714	-8144	1.0862	1	0.469793	0.982869	1.03988	0.737902	FALSE
1	12597970	12598009	-13648	-4.95977	1	0.2362	1	-5.68218	0.399371	FALSE
1	12602432	12602523	-18110	0.427918	1	-0.669428	0.991475	0.080867	0.995868	FALSE
1	12602710	12602778	-18388	-0.319244	1	0.919919	1	-3.11825	0.739901	FALSE
[truncated: 182,461 more rows]
