# Supplementary material for: Dynamics of cardiomyocyte transcriptome and chromatin landscape demarcates key events of heart development
Source: HighWire-hosted journal article supplement (doi:10.1101/gr.244491.118), 2019-02-13
Supplement: Supplement_Table_12.docx [file Supplement_Table_12.docx]

| **Gene name** | **Accession number (RefSeq)** | **Primer name** | **Primer sequence** |
| --- | --- | --- | --- |
| *nkx2.5* | NM_131421 | nkx25_F1 | GCCATC CGGATC CTCTCT CT |
| *nkx2.5* | NM_131421 | nkx25_R1 | TTCCTG ACAAAA CCCGAT GTCTTT |
| *myl7* | NM_131329 | myl7_F2 | CCAGAG GAAACC ATCCTT GCT |
| *myl7* | NM_131329 | myl7_R2 | TGGTCA ACCTCT TCTGCT GTG |
| *neurog1* | NM_131041 | ngn1_F1 | CCAGCC CACCAA TAAGGT TATCAA |
| *neurog1* | NM_131041 | ngn1_R1 | TGGAGA CGCAGG TGGTTT TC |
| *gfp* | NA | gfp_R1 | GGCAAG CTGACC CTGAAG TT |
| *gfp* | NA | gfp_F1 | GGCGGA CTTGAA GAAGTC GT |

Supplement Table 12. qPCR primer list.
