# Supplementary material for: Dynamics of cardiomyocyte transcriptome and chromatin landscape demarcates key events of heart development
Source: HighWire-hosted journal article supplement (doi:10.1101/gr.244491.118), 2019-02-13
Supplement: Supplement_Table_13.xlsx [file Supplement_Table_13.xlsx]

## Sheet: Supplement_Table_10_rna_rld
Supplement Table 13. DESeq2 regularized logarithm (rld) values for RNA-seq samples. Numbers in columns are rld corresponding to samples indicated in table headers.
ENSEMBL_ID	ZFIN_ID	wt_GFPneg_24hpf_1	wt_GFPpos_24hpf_1	wt_GFPpos_24hpf_2	wt_GFPneg_48hpf_1	wt_GFPpos_48hpf_1	wt_GFPpos_48hpf_2	wt_GFPneg_72hpf_1	wt_GFPpos_72hpf_1	wt_GFPpos_72hpf_2	gata5_GFPneg_72hpf_1	gata5_GFPpos_72hpf_1	gata5_GFPpos_72hpf_2	tbx5_GFPneg_72hpf_1	tbx5_GFPpos_72hpf_1	tbx5_GFPpos_72hpf_2	hand2_GFPneg_72hpf_1	hand2_GFPpos_72hpf_1	hand2_GFPpos_72hpf_2
ENSDARG00000000001	slc35a5	5.12576	5.49139	5.92982	5.62924	4.98306	5.36643	5.47171	4.61679	4.25909	5.58783	6.25845	6.51522	5.94293	5.55591	5.50033	5.83153	5.13241	5.1395
ENSDARG00000000002	ccdc80	7.40806	8.25272	9.22048	6.58243	7.44689	7.70295	8.56028	7.79525	8.31555	8.01524	8.02808	7.36298	8.2911	8.74043	8.50181	8.94131	8.40084	7.79864
ENSDARG00000000018	nrf1	9.72171	8.88045	8.91602	9.89374	8.82434	8.80545	9.22324	9.15961	9.03463	9.2446	8.96955	9.07376	9.50124	8.27901	9.56695	9.43041	8.59309	8.93725
ENSDARG00000000019	ube2h	9.31606	10.5201	11.0523	9.87201	10.7409	10.6375	10.2344	10.6556	10.4467	10.0413	11.0455	11.5786	10.4768	10.9469	11.1779	10.2326	10.7656	11.0302
ENSDARG00000000068	slc9a3r1a	7.14886	7.86603	7.92918	7.12036	7.50733	7.98216	8.01871	7.28848	7.99358	7.76587	8.31316	7.09537	7.39537	8.42565	7.80734	7.62536	7.82143	7.98613
ENSDARG00000000069	dap	7.80677	7.7092	7.59444	8.64114	8.29712	8.66998	8.94839	8.73072	9.086	8.60594	8.56089	9.16894	8.78485	9.21425	8.73815	8.4884	8.95172	8.28104
ENSDARG00000000086	itsn1	11.4697	10.7483	11.1695	11.9298	10.9965	11.3154	11.3237	11.1836	11.3363	11.5714	11.1758	11.1669	12.0296	11.9031	11.361	11.9023	11.6946	11.869
ENSDARG00000000103	myh10	12.295	12.1199	12.1379	11.9492	12.4948	12.7471	12.0895	11.7893	11.6429	12.1189	11.4188	12.1383	12.1411	12.0707	11.7799	12.0907	12.7398	12.2945
ENSDARG00000000142	tmem267	5.32429	5.06246	5.60717	6.2832	6.18448	5.67641	5.31208	4.14041	4.15989	6.53055	4.80183	5.69007	6.21679	5.86215	4.97888	5.46404	4.92753	4.99619
ENSDARG00000000151	thraa	6.97537	7.12015	7.92898	6.67476	7.14667	7.64567	7.5831	7.67468	7.68845	7.9084	7.63218	6.52946	7.72687	8.54048	8.63602	7.76041	7.88543	7.99521
ENSDARG00000000161	itsn2a	6.58841	5.49852	7.5492	7.99275	9.37268	9.34144	7.91784	9.7292	8.96355	8.51685	9.32716	10.2065	8.82686	9.70923	9.91545	8.52667	9.12588	9.93094
ENSDARG00000000175	hoxb2a	7.13444	5.64705	5.71202	6.9918	6.13754	6.16307	7.07026	5.94151	6.43917	7.64823	6.27274	5.92632	7.03035	5.09529	5.55726	7.37462	6.7548	6.32838
ENSDARG00000000183	ptpn4b	8.67789	8.38829	7.07497	8.93488	6.33855	7.17962	7.79507	7.00043	8.09307	8.59124	7.38136	7.59043	9.44524	7.33612	7.14972	8.84887	6.57474	6.44259
ENSDARG00000000189	sema6e	8.17988	9.02196	9.27852	9.89744	10.0219	10.0612	10.0119	10.5665	9.92258	10.4821	9.46564	10.513	10.2144	10.282	10.3904	9.77731	10.1248	9.72667
ENSDARG00000000212	krt97	9.13867	5.31348	2.89483	8.56358	7.72871	5.73583	8.59738	7.1463	9.34029	8.39674	9.87298	7.86346	7.09173	6.65491	6.10742	8.35072	7.34882	6.4088
ENSDARG00000000229	usp49	9.3952	9.32318	9.48142	10.0661	8.3063	8.87506	9.24708	8.46914	9.10226	8.70292	6.80906	8.00464	9.42712	8.53949	8.16878	8.82623	8.1921	8.28097
ENSDARG00000000241	slc40a1	8.95489	9.13243	9.41517	8.97558	10.3091	9.40355	9.29934	11.3036	10.7958	9.08665	11.5575	10.1801	9.33988	12.4141	11.5296	9.25134	11.7659	12.205
ENSDARG00000000324	dcaf8	7.77635	8.24771	8.70889	9.15109	8.85231	8.82804	8.76297	8.87155	8.29957	9.2605	7.777	8.77847	8.96019	8.88715	9.1173	8.54106	8.81965	8.5659
ENSDARG00000000349	cfap300	0.885937	0.8852	0.884968	1.02663	0.885184	0.884958	0.886079	0.884861	0.884643	0.885972	1.27013	0.885667	0.884846	0.884682	0.88506	1.26451	0.950372	0.884867
ENSDARG00000000369	prkag3b	4.619	4.35683	3.88876	4.17632	4.86686	4.53151	4.24772	3.88799	4.441	4.45421	4.72751	4.90231	4.02231	4.30936	4.16244	4.21468	4.08921	4.04276
ENSDARG00000000370	triob	10.7717	10.1052	9.55459	11.076	9.81272	9.9144	10.7482	9.85893	9.68842	11.1347	9.67105	9.84818	11.7566	9.45199	9.10383	11.3164	9.50113	9.15287
ENSDARG00000000380	pde6a	4.11212	4.15023	3.4452	4.55121	4.03738	3.44498	5.06207	3.48143	5.51943	4.57843	3.9855	3.46136	4.88004	3.43839	3.44739	4.85769	3.44046	3.71089
ENSDARG00000000394	matr3l1.1	11.0161	10.304	10.7636	11.004	10.2758	10.5584	10.3943	10.3876	10.5432	10.5103	10.1258	10.6633	10.8304	10.4768	10.0857	10.7909	10.3567	10.6649
ENSDARG00000000423	si:ch73-314g15.3	5.623	5.99936	5.95049	5.25791	5.71519	5.76625	5.75269	6.40881	4.38941	5.46885	6.04541	6.11905	5.6562	5.09869	5.74165	5.92064	5.56219	6.01783
ENSDARG00000000442	slc39a13	7.09979	7.03234	6.32106	6.82818	7.24868	6.85815	7.92031	7.18021	6.24697	8.03528	6.80805	7.26506	7.19824	7.06254	6.97394	7.16078	7.07988	7.14799
ENSDARG00000000460	nitr2b	1.95956	1.95722	1.95648	1.95819	1.95717	1.95645	2.55501	1.95614	1.95544	2.02145	2.80803	1.95871	1.95609	1.95556	1.95678	1.95882	2.41856	2.50149
ENSDARG00000000472	cntn2	7.88928	7.80659	6.68745	9.65269	8.19368	8.12046	8.4476	5.68529	7.74365	8.99321	7.45152	6.79109	9.47031	6.62081	6.74133	9.15612	6.62438	6.88143
ENSDARG00000000476	pms1	7.09704	6.89466	6.32749	5.97679	6.57203	5.85915	7.41773	6.2264	6.98456	7.58392	7.63278	6.49155	6.63105	5.53112	6.91255	6.5458	6.42945	7.43735
ENSDARG00000000489	upf3b	8.13177	8.21403	7.35028	8.34482	8.81603	8.81023	8.27091	9.2608	9.33653	8.14846	8.88855	9.5001	8.24399	9.221	9.36303	8.09219	8.77598	9.43112
ENSDARG00000000503	stx1b	9.03409	3.46182	2.81036	11.383	8.71269	8.92344	9.19035	9.15918	8.93265	10.9727	9.26928	8.6425	12.6318	9.47757	9.36298	12.0053	7.59624	8.58069
ENSDARG00000000516	ankar	2.02746	2.0259	2.02541	2.49366	2.02587	2.25381	2.02776	2.02519	2.02473	2.02753	2.16388	2.02689	2.19471	2.02481	2.26148	2.14763	2.32529	2.46021
ENSDARG00000000529	ofd1	8.14013	8.29024	9.35491	8.03216	7.42774	7.7189	7.82413	7.24177	8.71924	8.12727	7.87225	8.43939	8.16139	8.05912	7.71065	8.28305	7.40255	8.05543
ENSDARG00000000540	asnsd1	8.012	7.87596	8.37078	7.73328	7.61505	7.4846	7.87265	7.53731	8.20329	8.04907	6.84459	7.75609	7.36194	7.08257	7.66931	7.57817	7.912	7.2096
ENSDARG00000000540	asdurf	8.012	7.87596	8.37078	7.73328	7.61505	7.4846	7.87265	7.53731	8.20329	8.04907	6.84459	7.75609	7.36194	7.08257	7.66931	7.57817	7.912	7.2096
ENSDARG00000000542	gtf2e1	8.1528	8.18163	8.24754	7.69821	7.94461	7.86217	7.90873	8.5437	8.0709	7.66717	7.91224	7.88161	7.89961	7.33702	6.94361	8.27111	7.81439	7.78559
ENSDARG00000000551	slc1a4	8.75015	7.99669	8.5583	9.51947	7.68777	7.77453	9.58747	8.25176	8.42814	9.50876	7.82958	7.99993	10.1597	8.61423	8.09075	10.0438	8.06246	8.87733
ENSDARG00000000563	ttn.1	13.1672	12.2824	13.0679	12.8816	14.761	14.7925	13.1448	14.4395	15.7443	12.8651	14.7659	13.2318	13.728	14.3059	13.9419	13.0765	15.194	13.9252
ENSDARG00000000567	znf281a	11.4938	9.99992	9.02497	11.4468	9.96507	10.0461	10.3923	8.78056	9.62847	10.2708	9.37537	9.15227	10.8338	9.36797	9.12988	10.6736	9.49989	9.2834
ENSDARG00000000568	ell	8.75483	8.71595	8.89985	8.55353	8.51073	8.61481	8.30989	7.7762	7.82087	8.37902	9.02023	7.94821	8.62038	8.53277	8.48896	8.63701	8.66145	8.65803
ENSDARG00000000588	grasp	6.15197	5.44099	6.38377	5.80662	5.72087	4.92132	6.5463	6.6311	6.3757	6.60164	7.37443	5.32798	6.30362	7.17575	6.40071	6.37662	6.8497	6.86117
ENSDARG00000000606	dnah6	6.31376	5.34671	5.62359	6.48709	5.31117	5.85585	6.43451	7.12319	6.05177	7.3961	6.23114	5.37549	6.21621	5.64646	4.13497	6.5623	6.449	4.52765
ENSDARG00000000631	ptpn4a	9.61599	9.35668	9.02151	9.75408	10.6868	10.1204	9.6849	10.3768	10.1618	9.93172	10.3878	10.0345	9.68658	10.4954	10.6633	9.49273	10.1245	10.1487
ENSDARG00000000651	osgepl1	3.6612	3.98316	3.48407	3.48686	3.97748	3.831	3.58616	3.48352	3.48239	3.66458	3.81381	4.16966	3.88576	3.77047	4.28753	4.07133	3.70653	4.03423
ENSDARG00000000656	psmb9a	1.47751	1.47586	1.47534	1.47655	1.94532	1.47532	1.47783	1.4751	2.3325	1.47759	1.47653	1.47691	1.47507	1.4747	1.47555	1.85594	1.55448	1.47511
ENSDARG00000000666	creg2	7.45878	5.93023	7.60376	6.73191	7.54616	7.13057	7.8486	7.54078	6.64978	8.02051	8.42683	9.05032	7.33438	8.19076	8.13969	6.74505	7.61428	8.13563
ENSDARG00000000690	sypl2b	7.89464	8.01654	7.89878	7.08599	10.5421	10.2458	7.8783	10.0362	9.10558	6.98562	9.70541	9.91619	6.82643	8.89258	9.85531	6.8397	9.74331	9.69751
ENSDARG00000000729	daxx	10.2555	9.88963	10.3711	10.059	9.20945	9.22711	9.75397	9.40443	9.15047	9.31257	9.35931	8.53278	9.51689	9.16225	9.16551	9.45812	9.27908	9.35291
ENSDARG00000000730	slc6a22.1	6.29697	6.02543	7.01759	6.09516	6.16169	5.5468	6.19393	6.4615	6.69598	6.50956	6.01513	5.12944	6.40398	7.39922	6.64081	5.98757	6.95167	6.54876
ENSDARG00000000747	lcmt2	4.8576	5.62877	5.38061	5.14673	5.51279	4.94542	5.61483	5.00279	4.6781	4.45584	4.16873	5.38668	5.51719	5.42492	4.89995	4.30306	4.75398	4.8396
ENSDARG00000000760	znf511	5.08836	5.60259	5.56975	5.54992	5.81942	5.41421	5.64939	6.55539	6.45151	5.04628	6.47281	7.3252	6.00469	5.62151	5.11773	5.8496	6.05158	5.59732
ENSDARG00000000767	spi1b	7.14215	9.48659	11.3102	6.84659	8.48612	6.62853	6.65324	9.41714	9.45604	7.22177	9.26738	8.69036	7.10292	10.4608	8.99005	7.62342	10.606	11.0658
ENSDARG00000000779	scfd1	8.79274	8.48659	8.48741	8.85743	9.14094	9.24068	8.81504	8.33561	8.11012	8.73537	9.17736	9.24377	8.71062	8.94535	9.09754	9.00508	9.00636	9.00774
ENSDARG00000000796	nr4a1	7.14031	8.71047	10.6458	9.01427	10.9482	8.76682	5.89682	11.8703	11.414	9.08962	11.4439	8.77776	9.82614	11.6781	11.3031	9.04313	12.3452	12.2359
ENSDARG00000000804	rassf6	4.46379	4.52161	4.76927	4.46209	4.20233	5.18648	4.77683	3.87556	4.70631	4.97086	5.19993	4.29242	4.17883	4.33232	3.87845	3.88765	4.52061	4.40077
ENSDARG00000000830	telo2	8.44105	9.071	9.02063	8.6415	7.81148	8.0283	7.65422	7.51586	7.75652	6.83272	8.74787	7.53907	8.14067	7.14718	7.4741	8.30063	8.05522	8.20873
ENSDARG00000000837	snx9a	7.62608	9.88687	10.3777	8.21188	8.16529	8.3647	8.22594	8.75095	7.90293	8.34336	8.97872	9.13293	7.57279	8.61167	9.02339	8.87507	8.24905	8.51471
ENSDARG00000000853	dstyk	10.043	9.73986	9.81364	10.015	11.0613	11.0711	9.84567	10.9689	10.8516	9.21756	10.7974	11.4769	9.98754	10.6515	10.8688	10.1441	10.3642	10.8768
ENSDARG00000000857	mapk14a	8.89154	9.10894	7.2512	8.43514	8.60739	8.23696	8.1473	8.26837	7.92685	7.63429	8.69592	8.20342	7.68578	8.72074	8.66446	8.20078	8.68055	8.43187
ENSDARG00000000861	scrib	12.3471	11.4892	11.4601	11.7162	11.9134	12.1475	11.3823	11.737	12.0369	11.2958	11.8638	11.8176	11.6176	12.4194	12.3797	11.346	12.104	11.9076
ENSDARG00000000887	zgc:56699	7.363	6.81252	7.76173	5.34091	7.97857	7.60041	6.14115	5.6035	6.37624	4.2918	7.12325	6.45047	5.14834	6.75345	7.3939	6.16234	6.41082	7.16564
ENSDARG00000000906	skap2	5.06255	5.32362	6.5086	6.19456	7.72465	6.69244	5.97472	8.27159	6.60875	5.41613	7.80432	7.36622	6.19058	8.01612	7.51806	4.58699	8.07752	8.27159
ENSDARG00000000935	unk	8.03976	8.24709	7.69356	7.87889	7.30024	7.50198	7.77248	8.14211	7.34331	8.27556	7.72677	3.94158	8.16621	7.30453	7.47843	7.88739	7.2979	7.28661
ENSDARG00000000943	dzip1	9.2073	8.75823	8.85353	9.32169	7.67633	8.38503	8.38009	7.2876	8.46437	9.06927	7.91318	6.9836	8.81735	7.58744	5.51072	9.25465	7.73141	6.27807
ENSDARG00000000966	ncor2	11.7298	11.1611	11.3321	12.0557	11.7293	12.2851	12.0769	12.0701	11.9423	12.036	11.9298	12.1764	12.2445	12.4467	12.3228	11.978	12.4441	12.4348
ENSDARG00000001014	myh9b	12.3399	13.021	13.1528	11.6231	12.1598	12.6276	12.014	12.1701	12.1273	12.1233	12.1464	12.5656	11.7296	12.5822	12.2027	12.5151	12.6584	12.9554
ENSDARG00000001015	znf384l	10.0254	9.59253	10.5513	10.5065	9.15534	9.72724	10.383	9.21945	9.6196	10.5427	9.33799	8.93982	10.5414	9.37091	9.0199	10.4344	9.24407	9.76828
ENSDARG00000001057	bysl	9.41244	9.43386	8.78431	7.49811	8.04081	8.35467	8.28327	7.95483	7.61321	8.34558	8.50397	8.621	7.79241	8.00539	8.51655	8.54887	8.01563	8.38329
ENSDARG00000001127	slc17a6a	6.11977	5.09197	2.95931	8.7741	6.52408	6.02153	5.3597	6.83784	5.37195	8.3303	5.83573	6.54552	9.51999	6.38688	6.59369	9.02794	5.73592	6.73811
ENSDARG00000001129	dicer1	11.3657	10.9927	11.2491	11.2769	10.6605	10.8896	11.168	10.6103	10.3751	10.961	10.5117	10.5905	11.2957	11.2033	10.9248	10.8454	11.2285	11.4197
ENSDARG00000001154	rimbp2	5.88007	3.89621	3.40784	7.24362	5.38596	6.16947	5.80282	3.37529	5.83961	7.74748	6.3314	6.23915	8.19031	4.6325	6.08193	8.09795	5.37155	5.95837
ENSDARG00000001162	matr3l1.1	10.6293	9.79851	10.5616	10.6458	10.1191	10.0397	10.3627	10.2996	9.60456	10.6949	9.19603	9.55221	10.4698	9.83675	9.7208	9.7136	9.83063	9.65078
ENSDARG00000001169	hsd17b8	5.06497	5.24538	6.28518	5.52456	5.83696	5.33855	5.6281	6.35489	6.51742	6.0046	5.9704	6.36033	5.79562	6.17468	6.1818	5.93479	5.35102	6.3252
ENSDARG00000001210	arl14ep	7.78586	7.44347	7.05161	7.35634	7.28734	7.03914	7.38358	8.43375	7.85434	7.00756	7.75007	7.33487	6.91094	6.32367	7.71588	7.51431	6.85527	7.03818
ENSDARG00000001220	mycbp2	12.2757	12.1139	12.7689	12.6698	13.4645	13.8525	11.9746	12.7497	12.3593	12.3395	12.5034	13.0089	12.9629	13.5742	13.2777	12.6048	13.216	13.2541
ENSDARG00000001234	map4k2	6.96077	8.13509	8.23774	6.18695	5.28612	5.66621	6.6673	6.46322	7.32135	6.79666	5.31121	3.74621	6.36499	7.02981	4.3019	6.37516	4.42874	4.65251
ENSDARG00000001241	puf60b	10.2769	10.457	9.5993	9.92216	9.1876	9.81447	9.62933	8.93819	9.23659	9.73775	9.28395	9.55686	9.66501	9.03455	9.1316	9.37352	9.11765	9.03431
ENSDARG00000001244	srrm1	11.6244	11.5602	11.0088	11.2545	10.532	10.8099	11.1667	10.4689	10.6535	10.895	10.3379	9.96137	11.0683	10.6046	10.0104	10.7214	10.7393	10.6348
ENSDARG00000001249	pcgf1	6.76424	6.55745	6.37417	6.62057	6.53561	6.60111	6.84931	6.13003	5.3674	6.18469	5.71081	6.49844	6.51801	6.25354	6.07296	6.74651	6.527	6.3044
ENSDARG00000001259	gas2a	4.95695	5.60097	5.78085	5.6254	5.83556	5.68514	6.83133	6.32269	7.08481	7.23653	5.94341	6.00397	6.3244	6.67922	6.99563	7.2528	6.0561	5.78965
ENSDARG00000001313	g2e3	9.3616	9.71765	9.89527	9.07224	7.59555	7.48617	8.21672	8.27262	9.15302	8.13638	8.03983	7.38614	8.16083	7.15257	6.67547	8.45491	6.47357	6.23072
ENSDARG00000001354	slc6a22.2	4.8664	4.02704	4.00227	6.87945	5.33546	5.3119	6.61603	5.65596	5.96229	7.15076	6.21978	6.21154	6.86084	6.76519	5.52427	5.29567	4.95509	5.70673
ENSDARG00000001414	mctp2a	4.26921	4.27467	5.16251	4.61807	5.35308	4.90528	5.06866	5.11863	5.55616	5.06672	6.60553	4.42521	5.00737	4.99666	4.49372	5.87783	5.38392	5.34276
ENSDARG00000001431	actn3b	8.63694	5.54244	2.77088	8.09955	8.45811	8.5743	8.40961	8.504	10.4088	7.96915	8.85281	8.1016	9.10054	10.0439	9.51114	9.22439	9.25707	8.99402
ENSDARG00000001437	slc2a1a	6.71081	5.4365	4.08353	5.61387	6.52768	6.12789	5.81474	4.53729	5.28307	5.00788	5.33737	4.13377	5.65418	6.67368	5.88775	4.76031	5.9157	6.49446
ENSDARG00000001442	inppl1b	5.79515	5.58649	3.38151	6.76199	7.57361	7.29463	8.27874	7.77683	5.02681	7.70243	8.26562	8.47023	7.23052	8.30242	8.63217	7.67584	7.64792	7.26014
ENSDARG00000001447	mier1b	8.26195	7.77668	7.7718	7.91419	7.26623	7.39754	7.47816	7.79399	7.29498	7.6465	7.27926	7.26837	7.99877	6.9761	7.47387	7.66534	7.43432	7.30327
ENSDARG00000001452	adam8a	7.92044	10.4438	9.81002	6.87341	8.93014	9.07401	7.67112	8.48767	8.28263	8.14466	9.14383	8.56796	7.66618	9.42066	8.90069	8.2136	8.71315	9.0452
ENSDARG00000001463	tdh2	3.68622	4.45707	3.65777	5.14397	3.66424	4.83021	5.86671	5.51825	3.64796	6.40913	4.54602	3.90506	5.03632	4.24182	3.66055	5.70948	3.65175	3.69359
ENSDARG00000001470	mhc1zea	7.73599	8.43866	8.33795	7.54087	8.49417	7.92527	7.87559	8.40369	7.5798	8.06356	8.34213	7.82937	7.40279	7.70868	8.01199	7.81734	8.18177	8.32073
ENSDARG00000001498	skap1	3.22683	3.51022	4.42985	3.61345	3.03541	3.03351	3.61077	3.03268	3.03084	3.80929	3.038	3.03943	3.63635	3.48904	3.03437	3.7014	3.273	3.03274
ENSDARG00000001549	sp3a	10.3717	10.3274	10.5832	10.0994	9.44324	9.86658	10.1249	9.72348	9.48344	9.83565	9.84638	9.54066	10.0064	9.70031	9.18999	9.82445	9.55461	9.79353
ENSDARG00000001557	tomm34	7.98127	8.42932	8.08772	7.46983	8.2261	8.01472	7.29812	8.18466	7.17658	7.31546	7.42719	7.09911	7.28595	7.15406	7.64926	7.39045	7.62964	7.23312
ENSDARG00000001558	kifc1	11.0286	11.0444	10.7611	10.2655	8.16599	8.69259	9.65659	9.20234	9.90448	9.45678	9.03191	8.75211	9.46409	8.39559	8.55635	9.17931	8.17154	8.2016
ENSDARG00000001559	csmd2	6.07917	5.42036	6.03739	9.11247	7.2205	7.01972	7.25846	7.12565	6.32758	9.25263	7.34321	6.82881	10.6266	7.12874	6.65314	10.2735	6.88022	6.92018
ENSDARG00000001572	prf1.3	-1.81881	-1.82076	-1.82168	-1.81983	-1.82081	-1.82172	-1.81853	-1.8222	-1.82288	-1.81874	-1.81985	-1.81941	-1.79448	-1.82288	-1.82128	-1.81933	-1.82271	-1.82216
ENSDARG00000001578	echs1	7.32222	7.30589	7.8195	7.18081	8.82416	8.28667	8.0605	8.83614	8.53445	7.4277	8.71005	8.85655	7.2908	8.1174	8.16333	7.5498	8.37935	7.97009
ENSDARG00000001621	nfyal	7.51261	7.26696	6.94446	7.46026	7.60707	7.27314	7.38972	7.93977	5.38779	7.75272	7.46726	8.27897	7.91586	7.14604	6.89546	7.57165	6.99868	7.6565
ENSDARG00000001634	kirrel1a	10.778	9.84433	10.9732	11.0775	10.5215	10.8401	11.1215	10.8956	10.6445	11.0367	10.2288	10.8638	11.3414	10.6864	10.6344	11.4598	10.9147	10.871
ENSDARG00000001656	psmb13a	0.290571	0.290167	0.29004	0.290334	0.290159	0.290035	0.42937	0.289982	0.289863	0.290591	0.290329	0.290423	0.289974	0.476553	0.290091	0.290442	0.289931	0.5488
ENSDARG00000001676	gpm6bb	10.1162	7.33674	7.05715	10.2837	11.2016	11.4213	10.5654	10.6277	10.6561	9.40302	10.3081	11.203	10.1916	11.2546	11.2942	8.65204	10.8818	10.914
ENSDARG00000001686	uckl1a	2.87049	2.86654	2.86529	3.44758	2.86646	2.86524	3.09365	2.86471	3.1811	3.16983	3.63722	3.37337	3.67215	3.44794	2.86579	3.16628	2.94043	2.88783
ENSDARG00000001710	flot1a	9.97096	10.4941	11.0397	10.2677	10.0603	9.68204	9.53346	9.53762	9.39912	10.4071	8.8914	10.1844	10.5371	9.27547	9.29496	10.8366	9.57235	9.1165
ENSDARG00000001712	si:ch211-247n2.1	3.06016	3.39944	3.74762	3.33728	3.05294	3.71293	3.20735	4.31385	4.44907	3.0605	3.05594	3.05759	3.49503	3.04803	3.05173	3.75095	3.53908	3.04984
ENSDARG00000001721	oc90	7.77962	6.81436	9.77032	4.53608	3.85587	3.72399	3.71158	2.39773	4.40121	4.25907	5.27292	4.33544	3.01368	4.53705	2.47911	4.42551	3.51134	3.6279
ENSDARG00000001729	strn3	9.98676	9.46969	10.033	9.78365	9.61964	9.85552	9.92557	9.56513	9.77717	9.52138	9.47277	9.37148	9.81244	9.54273	9.04554	9.86762	9.5201	9.31699
ENSDARG00000001733	gulp1a	7.50122	7.30503	7.78088	7.59289	7.2026	7.06785	8.71761	6.67672	7.15774	8.26289	6.31179	7.00672	8.12896	6.40566	6.95295	8.14265	7.00632	7.03403
ENSDARG00000001734	fkbp8	7.75167	6.77239	7.29339	6.85305	7.89804	7.91756	7.26997	8.0677	7.24853	6.6658	7.83192	8.0488	7.72028	7.95755	8.26497	7.88864	7.87936	7.78433
ENSDARG00000001754	noc2l	10.6341	10.6353	10.3431	9.12589	8.51951	9.07204	9.56834	9.62408	9.68269	8.83099	9.10906	9.5207	9.06566	9.63564	10.0652	8.73828	9.54857	9.77736
ENSDARG00000001760	tnxba	4.2117	5.30391	2.33182	8.5926	5.3243	5.7194	10.1498	8.04359	10.3977	10.9179	9.87315	7.64333	10.3415	7.23151	7.73109	9.72363	6.59238	5.586
ENSDARG00000001767	slc29a2	7.92846	7.78704	7.24392	7.65309	7.04329	5.61008	7.70706	6.33293	6.50776	7.60345	6.42551	5.54	7.29229	6.93602	5.91296	7.65766	6.4353	6.52425
ENSDARG00000001769	ptpra	10.905	10.105	10.2593	10.7134	10.4606	10.6534	10.5782	10.3265	9.79019	10.4567	10.3506	10.5373	10.6281	10.3759	10.467	10.7016	10.516	10.5084
ENSDARG00000001771	otol1a	1.99772	1.72975	1.7293	1.87572	1.72972	1.72928	1.83846	1.7291	1.72868	2.23259	1.73031	1.73064	2.02455	2.21435	1.72948	1.73071	1.72892	1.72911
ENSDARG00000001776	stim2b	6.73978	6.50859	7.23501	7.02966	6.78094	6.53711	6.97067	6.62827	7.46997	7.61191	6.87541	4.27554	7.09054	6.68231	6.07412	5.39404	6.44649	6.38203
ENSDARG00000001777	nup155	11.7585	11.7225	11.6253	10.4972	9.99196	10.0427	10.4062	10.0409	10.2998	9.99829	9.82565	9.95382	9.99576	10.3161	10.0875	10.1482	9.91226	10.3964
ENSDARG00000001781	tspan11	4.69878	4.40742	4.42725	4.91843	4.36651	4.25686	4.50275	3.88342	4.60357	4.10135	3.73213	3.73407	4.31364	4.01476	3.72719	4.48911	4.16554	3.77379
ENSDARG00000001782	prkacba	3.50243	3.44942	4.45608	3.33735	3.27015	3.26672	3.28338	3.71581	3.26189	3.68241	3.74643	3.96684	3.62889	5.15908	4.0101	3.27786	3.89521	4.61718
ENSDARG00000001785	irx2a	7.73365	6.14206	8.20961	9.34236	8.03738	8.36431	7.59353	7.69566	8.30221	8.73547	7.46318	6.91602	9.37942	6.43038	6.62626	9.56773	8.78411	7.51345
ENSDARG00000001788	atp5po	9.77419	9.619	9.54851	9.57966	10.4704	10.04	10.0043	10.3452	9.71284	9.74808	10.9804	10.8048	9.69266	10.3371	10.5491	9.62978	10.3781	10.2148
ENSDARG00000001803	kcnh6a	4.0861	7.69363	6.99584	5.34495	8.8345	8.70666	6.46367	7.95805	6.30011	7.3196	8.51535	5.05256	6.74478	6.93105	6.13449	5.62268	9.2284	8.28689
ENSDARG00000001804	zgc:112148	2.644	2.63959	2.63819	2.64143	2.98169	2.69664	2.64485	3.46723	3.69816	3.57418	2.64137	3.19907	2.82144	2.63646	2.96874	2.6426	2.72375	2.63759
ENSDARG00000001807	tnfrsf21	6.66194	8.23072	8.37497	8.33489	9.93387	9.55612	8.55805	9.81479	9.35755	9.23294	10.1721	10.2366	9.07563	10.4913	10.4404	8.54622	10.1983	10.2961
ENSDARG00000001817	zmp:0000000521	5.17199	6.2334	5.42796	6.0441	6.65859	6.08521	6.16011	6.46008	6.32587	6.58653	6.16481	5.9862	6.54925	6.47544	6.49199	5.75115	6.2298	6.77267
ENSDARG00000001818	c3b.2	2.99677	2.72915	2.61455	4.67774	5.23432	2.60944	7.62033	8.16275	7.05746	3.00714	5.85323	2.91123	4.55829	8.82261	7.98204	5.94626	6.51273	7.12336
ENSDARG00000001825	cfap43	3.80845	3.8699	3.41746	3.77544	3.41854	3.41742	4.19551	4.30082	3.41585	4.00908	3.42008	3.42094	3.9081	3.51717	3.80368	4.11622	3.41647	3.64581
ENSDARG00000001829	zgc:112982	10.0526	9.74372	9.69768	9.88984	9.69905	9.1467	10.0635	8.84415	9.92518	10.3778	9.14468	8.78192	9.92571	9.40984	9.59523	10.3456	9.1171	8.97354
ENSDARG00000001835	nalcn	6.51135	3.27046	5.68037	8.4768	6.10097	5.81592	7.37899	7.20914	5.89648	8.48432	7.12162	5.29263	9.2574	6.50928	6.68121	8.82381	5.94689	5.56112
ENSDARG00000001857	aff4	10.4494	9.6593	10.8229	10.9438	10.3077	10.6095	10.6125	9.92921	10.5104	10.4734	9.78463	10.19	10.8993	10.7805	10.0681	10.7527	10.3898	10.2345
ENSDARG00000001859	dbx1b	6.65071	4.55503	3.69072	5.39916	5.29249	5.08677	5.59654	3.68513	3.67349	5.20329	4.99942	3.72555	5.59618	4.10137	4.73182	5.4468	4.07747	3.78742
ENSDARG00000001870	atp1a1a.4	8.82922	5.90636	4.50055	9.0077	8.50672	5.39383	8.93344	9.60176	10.766	9.7848	10.7645	9.6319	8.23055	10.072	9.8392	8.57639	10.3996	9.21518
ENSDARG00000001873	phgdh	10.8089	9.61671	8.48789	9.46699	8.89752	9.04727	10.0536	9.1455	8.91569	9.31662	9.55887	8.68124	9.28671	8.75747	8.56193	9.61374	8.55338	9.01843
ENSDARG00000001879	nav2b	10.2739	9.74423	9.30618	8.93228	8.99761	9.29968	9.10362	8.25139	9.17088	9.29918	8.99497	7.93909	8.08112	8.71839	8.07999	8.02601	9.00871	8.59746
ENSDARG00000001880	stx3a	6.35167	7.28472	6.7845	7.19021	7.67299	7.0283	7.39741	7.73643	6.55944	8.34295	6.91648	6.26915	7.67998	7.0291	7.03447	7.85253	7.37964	7.54931
ENSDARG00000001881	cacnb3a	4.70777	3.50988	3.49799	4.97058	4.29857	4.04482	4.79829	3.4924	3.48075	5.42831	3.99268	5.18031	6.51565	3.88089	5.31717	5.85696	3.81209	3.82114
ENSDARG00000001882	kbtbd12	3.45226	3.44324	3.44036	3.55094	4.18757	3.64198	4.15052	3.43902	4.24962	3.6493	4.16409	3.44898	4.12915	4.79643	4.25681	3.44941	4.21695	4.63684
ENSDARG00000001888	ppm1ba	8.71616	8.78176	9.69758	8.96049	8.64691	9.13722	8.66817	9.25275	9.43548	8.83979	7.8034	8.64935	9.14857	8.98058	8.77173	8.73052	8.86567	8.97065
ENSDARG00000001889	tuba1a	13.4019	10.9995	10.343	14.062	12.5964	12.2901	12.9387	12.1841	12.7467	13.2568	12.2336	11.8908	14.1211	11.6296	12.2494	14.0426	11.1584	11.4807
ENSDARG00000001890	stt3b	11.3929	11.3352	11.5338	11.2244	11.3058	11.4676	11.0599	11.0883	11.1506	10.7845	11.0457	10.7723	11.0862	11.1886	11.132	10.787	11.0471	11.3735
ENSDARG00000001891	syt14b	4.24642	4.20278	4.31032	5.13635	4.84657	4.33073	3.96763	5.05902	4.91604	4.89987	5.13107	3.95794	5.86561	5.27531	4.13634	4.69045	5.15384	4.9066
ENSDARG00000001897	man2b1	8.88241	9.7059	9.40712	8.67953	9.56372	9.7742	8.12076	9.38086	9.66926	8.22721	10.1659	10.0353	8.20168	10.1591	10.3672	8.06283	9.86453	9.98158
ENSDARG00000001898	manea	6.2047	6.47339	5.77697	6.73286	6.85789	6.97466	6.9016	6.83799	6.81537	6.80491	6.22927	6.6973	6.46882	6.56783	7.29096	6.61088	6.88363	6.71768
ENSDARG00000001906	si:dkey-247m21.3	2.97383	2.43737	2.43632	2.84149	2.50692	2.69677	2.507	2.43584	2.43484	3.4142	2.4387	2.43948	2.48269	2.43502	2.43674	2.88803	2.43541	3.17345
ENSDARG00000001909	vill	5.60031	3.9499	3.92576	5.73948	4.81229	4.95486	6.69943	5.64889	7.17442	7.02632	7.04104	5.2501	5.38235	5.62765	6.11832	4.98543	5.61908	5.33533
ENSDARG00000001910	rorab	8.80383	6.19424	5.52019	10.3017	10.5955	10.8857	9.89471	10.6189	10.7602	10.5886	10.3785	11.2293	11.0429	10.7592	11.1463	10.1624	10.3974	10.6998
ENSDARG00000001912	drd4-rs	3.37462	2.93544	2.93349	3.79737	2.93532	2.93342	3.8141	2.9326	2.93075	3.85889	3.49769	3.1522	4.20597	2.93108	2.93428	3.36475	3.10601	2.93265
ENSDARG00000001913	palmda	4.61	4.2018	4.07096	5.50908	4.57668	4.68281	4.70678	5.00856	4.08034	5.07589	4.07539	4.07684	5.20798	4.58787	4.07174	4.60362	4.67771	4.64797
ENSDARG00000001929	pink1	6.45664	7.42675	6.2562	6.79204	6.68724	7.10296	6.4135	7.4913	7.61823	6.93305	7.61861	6.14217	7.10633	7.24153	6.96538	6.11192	7.5693	6.70957
ENSDARG00000001930	klhl15	6.86213	7.57627	8.21505	7.79548	7.65994	7.58268	7.43649	7.50227	7.8275	7.46345	7.4019	6.34069	7.88941	7.17313	7.20882	7.61029	7.37555	7.05333
ENSDARG00000001933	prkag2b	4.74922	5.14415	5.92846	4.21278	5.86146	5.91873	5.15688	5.26773	5.59444	4.86354	5.92901	6.18832	4.49098	5.5013	6.0271	4.22133	5.95885	5.69546
ENSDARG00000001937		3.35955	2.37622	2.3749	2.52688	2.37613	2.6444	2.38116	2.37429	2.37305	3.53908	2.37788	2.37885	2.65002	2.37327	2.37543	3.1611	2.63929	2.37433
ENSDARG00000001939	b3gat3	7.91214	8.29982	7.3544	8.22518	8.12057	7.52102	7.91612	7.73907	7.20552	7.37581	6.78137	6.75027	7.56304	7.55414	7.20783	7.30003	7.27006	6.91246
ENSDARG00000001940	dnajc1	8.99446	8.79829	9.11821	8.84748	9.88646	9.71306	8.72159	9.76708	9.90186	8.63211	8.98122	10.5544	9.06326	9.78585	9.84774	9.44313	9.66748	10.1316
ENSDARG00000001950	ak1	4.25753	3.96069	3.91514	5.94988	6.92294	6.49427	6.66074	6.90266	6.03771	6.20315	6.67513	6.37306	6.77722	7.42133	7.74013	7.20115	6.77788	6.79788
ENSDARG00000001953	pfkfb3	6.79055	7.56345	7.28476	6.94883	7.87674	7.1648	6.56645	7.70506	8.10577	8.47279	8.23144	7.04818	7.7091	8.06998	7.95547	7.37073	8.8101	8.83623
ENSDARG00000001968	dock5	8.2512	5.56519	6.36705	7.12017	7.68345	8.49852	8.5286	6.07591	7.38641	6.87397	8.45743	8.2615	7.73131	8.25404	7.95929	8.12239	8.14374	8.19366
ENSDARG00000001969	txlng	8.42074	8.39179	8.92909	8.3642	7.5032	7.48479	8.00848	8.164	8.29374	8.32514	8.79615	7.92989	8.25838	8.07847	8.27652	8.68778	8.28111	8.59573
ENSDARG00000001971	cthrc1b	3.45085	3.43521	3.43015	3.44177	3.43488	3.42994	4.98545	4.50466	4.7851	5.39636	4.73155	3.4452	4.65612	4.154	3.81514	4.20486	4.087	3.46587
ENSDARG00000001975	hsd11b2	4.02439	7.20941	5.91776	7.91774	7.65502	7.67136	8.68903	8.26853	7.25011	9.39993	6.76731	7.53284	8.35656	8.04431	7.27063	8.84017	7.74452	6.91328
ENSDARG00000001976	fkbp16	3.69223	3.65579	3.64361	5.04562	3.655	4.52185	6.40343	5.91325	5.04345	5.56022	5.87413	3.67925	5.47328	5.08748	4.38639	4.86347	4.24447	3.63822
ENSDARG00000001993	myhb	4.17241	5.01285	2.25338	5.64863	5.48099	5.09149	9.78568	9.87399	11.211	9.1893	5.32966	6.81384	11.071	9.83417	8.14896	10.3047	9.64183	8.47845
ENSDARG00000001994	stxbp1a	8.82574	6.42664	4.6372	10.3705	8.95958	8.59213	8.49025	8.69607	7.33088	10.2226	8.72442	7.66339	11.4991	8.08496	8.9775	11.2278	7.15298	8.15757
ENSDARG00000001999	adamts18	8.74928	7.55947	7.45813	9.23747	7.46873	7.50721	9.06023	7.37693	6.46701	8.63432	6.55338	7.35233	9.0593	8.03891	7.09933	8.72043	7.48853	6.41865
ENSDARG00000002002	lmcd1	5.2743	5.47114	4.07557	6.0062	5.9748	5.71156	6.81778	6.7012	4.03584	5.28807	6.73679	5.42878	6.25579	5.8151	6.63379	6.25601	7.00709	7.1975
ENSDARG00000002006	rxrbb	7.15598	8.22877	7.3017	8.51716	8.35084	8.39901	8.19261	8.18458	8.31577	7.99881	8.33891	8.84295	8.49186	8.85498	8.45405	8.56371	8.2506	8.19001
ENSDARG00000002013	grb10a	8.72333	8.62433	8.8666	8.00787	7.62289	8.06121	8.42408	8.64209	8.9646	8.30107	7.28497	8.07538	7.69675	8.63308	7.50651	7.47743	8.00878	8.23134
ENSDARG00000002016	ppil2	8.82706	8.79229	9.17977	8.72905	8.55757	8.1355	8.61509	8.78421	8.09563	9.01046	8.46638	8.10921	8.44906	7.83583	8.46651	8.78934	8.15139	8.05153
ENSDARG00000002020	rictorb	8.78247	9.24428	9.23425	9.07358	9.07116	8.87521	8.93442	9.25137	8.6584	9.32713	8.80716	9.25292	9.35457	9.50937	9.09445	8.34752	8.8484	9.01231
ENSDARG00000002021	pygb	7.69456	10.4878	10.5708	7.85809	10.5933	10.7816	9.03838	10.5738	8.86403	9.04747	10.434	10.826	8.52746	10.3949	10.5422	8.21139	10.2373	10.4428
ENSDARG00000002026	qkib	9.23075	7.49226	7.66564	9.90725	10.526	10.7351	9.6186	10.2603	9.41529	9.43128	10.2408	10.8183	10.304	11.0677	10.3821	10.0378	10.9134	11.2089
ENSDARG00000002031	tox4a	9.1848	8.68245	8.65223	8.76485	8.18472	8.16988	8.9366	7.04503	8.81047	8.42068	7.6029	7.68656	8.64381	7.5282	7.95035	8.30344	7.88168	7.647
ENSDARG00000002037	pfkfb2b	4.5696	4.1737	4.16528	5.39396	5.86725	5.17245	5.52693	4.71983	4.40015	5.34065	5.49093	5.2431	5.95787	5.62739	5.72138	5.86158	5.03306	5.4531
ENSDARG00000002060	brf2	6.1582	5.6115	5.99366	5.93853	5.76955	5.18967	6.08029	6.13532	4.97767	5.32082	4.29584	4.38382	5.39197	5.95394	5.70286	5.09156	5.16601	5.44429
ENSDARG00000002071	adss	5.69066	3.99086	3.93979	6.71742	7.15261	7.22151	7.23954	5.5116	7.477	6.87309	7.4769	6.43317	6.97038	7.05376	7.11001	6.52059	7.32353	6.21841
ENSDARG00000002077	mnat1	6.3602	7.26436	6.99147	6.98723	7.07238	7.0167	5.13916	6.64096	6.60389	7.18009	6.14813	7.13781	7.17439	6.39915	6.52468	6.94209	6.53087	7.1538
ENSDARG00000002082	csnk2a1	10.7716	10.7977	11.1422	10.8146	11.0102	10.9862	10.5573	11.0984	10.9312	10.6294	11.1676	11.0613	10.7394	10.6849	11.0599	10.9888	10.8633	11.0789
ENSDARG00000002084	lamb2	8.6974	8.6099	9.04773	8.96063	11.9002	11.93	9.29481	11.1415	10.8791	9.04406	9.44069	9.80755	9.39424	11.7623	11.8796	9.66094	11.1129	10.5244
ENSDARG00000002097	si:dkeyp-52c3.7	1.57641	1.51329	1.51273	1.88892	1.51325	1.5127	1.51539	2.40915	1.51195	1.51513	1.51399	1.5144	1.51244	1.51204	1.51295	1.51449	2.02478	1.53713
ENSDARG00000002127	stam	10.1683	9.66459	10.317	10.5643	10.3963	10.3285	9.64438	9.77695	10.3528	9.92226	9.49165	9.86947	10.3536	10.1719	10.1788	9.97648	10.1169	10.1097
ENSDARG00000002128	cwf19l1	8.87968	8.60741	7.65528	8.3884	8.03565	8.19819	8.34018	7.9337	8.74866	8.19726	8.73165	8.78845	8.04052	7.85757	7.84066	8.71071	7.85492	8.48689
ENSDARG00000002131	celf2	10.2226	9.70517	10.4514	11.6035	11.1086	11.4291	10.7972	10.6335	10.3113	10.8344	10.5823	11.2408	11.5917	10.9325	10.9481	11.2433	10.6564	11.1767
ENSDARG00000002165	psme1	3.94353	3.85491	5.75076	3.89348	5.84693	5.16663	5.14681	6.08571	6.76923	5.81701	7.2797	7.13969	5.25423	5.65295	5.47207	5.21028	6.74136	7.24605
ENSDARG00000002167	cacnb1	7.05324	5.20838	6.2287	7.63888	6.28992	6.14307	7.54162	3.54182	6.21353	8.51472	7.08903	6.78021	8.36992	7.20119	6.38786	8.29651	6.2057	6.39814
ENSDARG00000002168	tra2b	10.0154	9.83976	9.11806	9.63383	9.03406	8.97667	8.85234	9.13461	9.11853	9.71417	8.50858	9.10871	9.47059	8.41032	8.77526	9.24541	8.68955	8.92048
ENSDARG00000002172	aplnra	8.1867	9.59973	8.9016	7.24939	8.3734	9.14509	7.2879	7.29106	6.31592	7.814	5.57847	4.28588	7.01599	6.7842	6.62681	6.77338	6.18022	5.98767
ENSDARG00000002174	itfg2	6.64311	6.7594	6.96615	5.44637	6.36169	6.32113	6.66134	5.35903	4.23427	5.66262	6.76786	6.79223	6.10662	6.2287	6.82326	5.54326	6.24705	6.77323
ENSDARG00000002184	igbp1	7.99882	8.00542	7.76334	7.97246	7.7978	7.80346	7.27944	8.27004	8.52691	7.81473	8.73009	7.81148	8.13988	7.60954	8.03268	8.59175	7.80045	7.86711
ENSDARG00000002190	chmp2bb	7.28704	7.28951	7.38014	8.00603	10.159	9.95366	8.26616	9.83233	9.59553	8.18066	9.86772	10.4269	8.46679	9.53146	10.686	8.56496	10.1345	10.2849
ENSDARG00000002192	aspn	4.62351	4.29355	5.98015	6.26598	6.31157	4.62399	8.30482	5.74181	3.49239	7.1603	4.51332	5.49432	6.7004	5.07647	5.75778	6.77052	5.79287	4.46778
ENSDARG00000002193	rho	2.728	2.21783	1.97503	7.10546	2.20373	3.44853	11.3997	8.92311	9.88279	9.96317	8.69215	7.89036	10.3611	7.18646	4.41443	9.15634	6.26989	3.60546
ENSDARG00000002194	rhd	8.19116	9.981	10.8577	9.03688	5.58496	5.52251	5.76876	5.38596	2.23132	6.86529	4.33693	4.56469	7.23478	2.48388	5.37465	7.46111	5.03272	5.99107
ENSDARG00000002196	bach1b	7.67146	8.35925	8.99425	7.83973	8.56157	8.59141	8.08578	8.19624	8.7403	8.52531	9.33697	8.77113	7.6127	9.46013	8.62819	7.1808	9.39032	9.12566
ENSDARG00000002197	pygl	5.27864	5.77043	5.79003	6.53013	5.80676	5.99071	8.36196	9.84352	10.0123	7.30527	8.40404	7.60121	6.7515	11.6255	10.6532	6.48465	9.19148	9.47396
ENSDARG00000002204	hspb11	3.45073	3.41062	3.39709	3.71815	5.8112	6.26607	3.92985	4.85602	3.37733	3.45255	4.20148	3.43651	4.65565	6.07089	5.6899	4.68096	5.15976	3.82657
ENSDARG00000002210	stk25a	5.8047	5.5878	5.36345	6.11847	5.50368	5.72555	5.98127	6.07948	4.15886	5.27862	5.7196	4.21475	6.55788	5.09206	4.43671	6.33429	5.66219	4.94438
ENSDARG00000002213	invs	7.03698	7.42544	6.59731	6.78635	6.61278	6.4384	7.17497	7.19539	6.09858	7.28857	6.44171	7.17564	6.70993	6.73744	6.70107	6.79507	7.31019	7.05815
ENSDARG00000002215	rtca	10.1776	9.20408	9.77687	9.38823	9.3462	9.25029	8.70449	8.15177	8.0925	8.23253	8.66032	8.61457	8.50104	8.70569	7.47972	9.04195	9.00207	9.18105
ENSDARG00000002216	tbx3a	8.05893	7.31912	7.40912	8.06358	6.36108	6.74331	8.82985	7.43744	7.3495	8.73276	7.29051	7.13587	8.85622	6.27248	6.64725	7.78781	6.49748	7.13452
ENSDARG00000002217	scocb	8.48173	8.3088	9.56971	9.2258	9.41233	9.43501	8.6031	9.20825	8.54881	8.69453	9.25162	9.31854	9.91223	9.15394	9.1813	9.63606	9.38735	9.60078
ENSDARG00000002219	si:dkey-103j14.5	2.41346	2.4085	2.40692	2.70311	2.4084	2.40686	2.94743	3.79919	2.40469	2.4137	2.4105	2.41166	2.6372	3.35838	2.40755	2.41189	3.2983	2.40623
ENSDARG00000002220	zgc:103692	7.19844	6.63281	7.45388	7.34379	7.72822	7.47991	7.4002	8.08101	7.16983	7.25631	6.16799	7.70531	6.99376	6.76692	7.47577	7.44035	7.45962	6.55016
ENSDARG00000002230	sypb	5.72769	3.28239	2.86926	8.05733	6.09357	6.50823	8.77347	8.31358	8.81479	8.78442	7.61321	7.41035	9.60647	6.9174	7.23061	9.0247	6.12482	5.81381
ENSDARG00000002231	plpp2a	5.61091	7.4989	7.28455	6.61348	4.15092	5.02029	6.72072	5.90864	6.58263	6.72737	5.76883	5.07418	6.01193	6.2985	5.92096	6.345	5.85392	5.75468
ENSDARG00000002235	mmp14a	8.97919	7.96355	8.62523	9.55309	9.49109	8.91772	10.7723	9.19401	9.70948	10.543	8.8847	8.4685	10.2127	8.48769	8.75763	10.7524	8.79614	7.77283
ENSDARG00000002240	psmb6	9.68038	10.2069	9.92462	9.30757	10.1681	10.0491	9.20469	9.36166	9.50532	8.76776	10.0894	10.5921	9.22914	9.43342	9.84737	9.73738	9.685	9.93441
ENSDARG00000002241	kcna2a	2.79754	2.79273	2.7912	3.37995	2.79263	2.87646	2.79846	3.49218	2.78906	3.88718	2.79466	3.07965	3.61313	2.96206	2.79182	3.58672	3.05589	2.81669
ENSDARG00000002249	tbxas1	4.61403	4.09981	6.42607	6.92347	7.60386	7.9293	7.41107	8.15545	7.84977	6.82624	8.39654	7.91739	7.29481	8.26194	8.48018	6.61177	7.79109	7.77434
ENSDARG00000002255	epb41l3a	7.53792	7.09359	8.38483	9.35075	7.76297	8.56941	8.30908	8.64455	8.09972	9.29223	9.09119	8.24562	10.0764	7.8785	7.90499	10.1007	7.28647	7.88424
ENSDARG00000002259	ca15c	0.192668	0.192135	0.191967	0.192356	0.192124	0.191961	0.19277	0.19189	0.191733	0.192693	0.715573	0.192473	0.19188	0.280991	0.192035	0.192498	0.228032	0.191895
ENSDARG00000002264	mrpl41	5.10206	5.23655	4.76027	5.71202	5.47016	4.94722	5.67472	4.92148	4.99086	5.11242	5.80342	5.83505	5.07922	5.44826	5.24323	5.44509	5.3618	5.49412
ENSDARG00000002267	dcaf13	9.20501	8.73814	8.53101	7.99093	7.45105	8.25465	8.46617	8.88007	8.86837	7.85549	8.98524	8.82901	7.76768	8.55619	8.3413	8.44922	8.28449	8.25993
ENSDARG00000002271	zfand5b	9.4459	9.10257	9.32644	9.62455	9.91232	9.88568	9.5129	9.68844	10.0522	9.7018	9.77975	9.72433	10.1192	9.70694	9.66861	9.91186	9.68438	9.42329
ENSDARG00000002285	mcoln1a	7.54499	8.8629	8.22626	8.14615	9.79139	10.1489	8.34139	9.41928	9.11478	7.63838	10.1673	10.3831	8.2991	10.2367	10.1209	8.21071	9.9128	10.1444
ENSDARG00000002293	si:ch211-197g15.6	2.54486	2.54062	2.53928	2.68513	2.54053	2.53922	2.54567	2.53866	2.53739	3.61511	3.46422	3.33611	2.56456	2.77476	2.53982	2.60126	3.13032	2.84805
ENSDARG00000002295	si:dkey-21p1.3	2.04192	2.03954	2.03879	2.3131	2.4651	2.03876	2.04238	2.03844	2.03773	2.94231	2.0405	2.04105	2.12702	2.10547	2.03909	2.67339	2.23749	2.06234
ENSDARG00000002298	ankrd22	3.72173	3.69846	3.69084	3.85563	4.40307	4.59806	3.72607	5.45032	5.44347	5.4131	4.80193	6.01723	4.05132	4.74317	4.81429	3.80153	4.59519	4.58924
ENSDARG00000002299	arsh	6.11375	5.41302	5.65074	6.2591	5.61686	6.01167	6.93831	6.04353	6.75756	5.89848	6.64617	5.53958	6.64947	6.38702	5.82822	6.49345	6.21721	6.10806
ENSDARG00000002300	p2rx2	3.16435	2.89129	2.88981	2.98469	2.8912	2.88975	3.35609	3.9647	2.88774	3.21396	3.10268	2.89425	3.44333	3.3669	2.89041	3.78174	2.93065	3.41801
ENSDARG00000002304	gins2	6.80322	7.19306	7.8822	5.39889	5.39171	5.39301	6.45969	3.87333	6.87123	4.78835	5.58282	5.24768	5.51423	5.13056	5.87641	5.09357	5.93903	6.117
ENSDARG00000002305	me3	8.59464	8.08481	8.11669	8.87769	9.2091	8.69075	9.2655	8.88934	9.47083	9.15491	9.52272	8.19524	9.17407	9.4864	9.27091	8.91566	9.26006	9.2147
ENSDARG00000002311	fabp11b	0.343981	0.343448	0.343281	0.343669	0.343437	0.343274	0.344084	0.343203	0.343046	0.344007	0.343662	0.343786	0.580511	0.343074	0.789807	0.343812	0.343136	0.343208
ENSDARG00000002330	lhx8a	3.34484	3.32944	3.32444	4.36387	3.32911	3.58937	5.08714	3.32212	3.76023	4.78148	3.33569	4.5258	5.12202	4.05137	3.32645	4.75224	3.32009	3.81193
ENSDARG00000002332	frmd6	8.02438	8.10465	7.1676	7.76197	6.94349	7.27022	8.56882	3.25296	6.28918	8.99656	6.31214	4.96228	8.11434	6.35261	6.88395	8.48233	6.86	6.08215
ENSDARG00000002333	fam102bb	8.01576	7.72842	8.26956	8.46979	7.64327	7.64889	7.80639	8.24355	7.57487	7.90275	7.74583	8.1815	8.35262	7.6965	7.04064	8.60272	7.4942	7.03286
ENSDARG00000002336	dlc	10.2946	9.33777	9.82505	10.0389	9.42988	8.96442	9.47435	9.44246	10.0232	9.74764	9.16491	9.18298	9.73056	9.10259	9.34871	9.91525	8.30205	8.6851
ENSDARG00000002339	sgf29	7.511	7.36107	6.43406	7.66534	7.32534	6.76182	7.03992	7.07154	6.99914	7.88287	7.82604	8.28741	7.7237	6.88479	7.84958	7.98948	6.88057	6.90039
ENSDARG00000002344	tubb4b	13.5762	13.5146	13.5187	13.2983	13.9139	13.7647	13.1481	13.8038	13.9331	13.2908	14.3914	14.3664	13.3077	13.943	14.3562	14.3746	13.7773	14.2921
ENSDARG00000002347	cyp11a1	1.53467	2.02607	2.5688	1.53343	1.5325	1.53185	1.53507	1.53157	1.53093	1.53477	1.5334	1.53389	1.53153	1.53105	2.06775	1.53399	1.5313	1.53159
ENSDARG00000002353	tagapa	5.20885	4.57922	6.00103	4.77244	5.95043	5.48802	5.83728	9.25539	7.93469	5.22998	7.37949	5.68797	6.49197	8.46164	8.40952	6.02059	9.70592	9.57107
ENSDARG00000002355	shpk	3.58163	3.75844	3.49826	3.93	3.84296	4.30894	3.83557	4.28571	3.49392	3.58339	4.0496	3.50746	3.69711	4.86827	4.71223	3.73045	4.46478	4.66195
ENSDARG00000002362	ubald1a	6.88092	7.40551	8.05373	8.34834	8.09331	8.04635	7.76269	8.10241	7.13931	8.61294	8.40431	8.83903	8.57317	7.7249	7.93034	8.36601	8.08153	7.54403
ENSDARG00000002365	cers5	7.58287	7.8275	6.86037	6.3869	9.36843	9.14682	7.91274	9.65028	7.69988	7.55758	8.93029	9.63254	7.09327	8.6121	9.15782	7.53334	8.87269	9.10297
ENSDARG00000002369	si:ch211-202a12.4	13.5544	13.7182	13.1253	13.0238	14.3509	13.9892	12.8499	14.0854	14.001	12.7424	14.8758	14.3642	12.8831	14.4321	14.8777	12.633	13.8651	13.434
ENSDARG00000002377	mief2	7.06013	6.98252	7.13921	6.73556	7.06211	7.22379	6.75435	7.28983	6.94074	7.26196	7.63138	6.13756	7.01816	6.55385	6.92589	6.59565	6.82378	6.59846
ENSDARG00000002385	atm	9.65863	9.68559	9.76994	9.11431	9.00121	9.05089	9.26668	8.76596	9.09807	7.72502	8.61489	9.33312	9.22285	9.59909	9.6253	8.25899	9.30754	9.39725
ENSDARG00000002391	tlcd1	3.1314	3.12433	3.12208	3.40245	3.12419	3.12199	4.00731	4.37038	3.41985	3.13174	3.43816	4.28727	3.37907	3.41267	3.12298	3.34749	3.79141	4.08851
ENSDARG00000002394	ugt5d1	2.68004	2.67436	2.67255	2.67673	2.67425	2.67248	3.32432	3.92594	2.67001	2.68031	2.67665	3.36983	2.91919	3.91143	2.67328	2.67824	2.94923	3.35434
ENSDARG00000002396	cry-dash	7.7165	7.92805	7.38474	7.09165	10.3836	10.0598	9.21083	10.5253	9.97561	9.34486	9.95425	10.6077	8.55718	9.71626	10.3732	8.96025	9.65535	9.80562
ENSDARG00000002401	gale	6.16738	7.11559	3.97017	6.88274	7.39901	6.75919	7.3384	7.83507	7.90215	7.45008	7.62595	6.63135	6.37679	7.30431	7.21541	7.25639	7.09876	6.98077
ENSDARG00000002402	ercc3	9.17428	9.13461	9.13232	8.70337	8.47236	8.37716	8.49249	9.08415	9.2753	8.73214	9.1898	9.09639	8.76157	8.48866	8.51615	8.55618	8.86016	8.73206
ENSDARG00000002403	nusap1	9.76147	9.42534	9.64641	9.19422	8.46187	7.98625	9.28865	8.73187	9.19215	8.61132	8.91992	8.18789	8.88128	7.79171	8.06028	8.83877	7.65989	7.63575
ENSDARG00000002405	si:ch211-225b11.1	8.15497	10.2794	10.7187	7.31531	9.49281	9.07875	7.26223	8.80457	9.00292	6.36178	9.04739	8.45761	7.26047	9.16754	9.25523	8.15321	8.60408	8.88008
ENSDARG00000002406	zmynd10	4.14615	4.17567	3.45573	4.07593	3.45866	3.86993	4.25083	3.45428	3.45131	4.08575	3.46282	5.09246	3.82091	4.16218	3.45699	4.27402	3.71414	4.58845
ENSDARG00000002411	pde4cb	7.19596	6.92692	7.29439	6.59727	6.37805	4.99556	7.03474	6.4999	7.84992	6.28419	6.92468	5.83719	6.82544	6.83189	6.53219	6.30631	6.50827	6.12957
ENSDARG00000002445	prdm1a	9.04156	9.53313	9.8434	9.74844	7.58309	8.07122	8.18345	7.60534	8.31644	9.23434	9.18382	6.72977	8.49732	8.6577	7.43521	8.67505	8.65655	8.74385
ENSDARG00000002463	arhgef37	7.10409	7.04275	7.32569	7.05581	5.93577	6.98844	6.77805	6.10036	7.13308	6.67633	6.6351	6.82111	6.46293	6.15939	5.53218	6.69615	6.68228	6.21538
ENSDARG00000002467	rdh14b	6.34743	5.10901	6.93343	5.2181	6.7257	6.10052	5.67221	7.03297	5.51197	6.47347	5.44963	6.41675	6.32614	6.07575	6.47064	5.66585	6.20735	5.87785
ENSDARG00000002479	ercc6l	10.1947	10.1903	10.5583	9.29673	7.95843	7.97706	8.9471	7.98695	7.70997	8.95888	8.54119	7.96764	8.60287	8.64302	8.01734	7.48317	7.99226	8.20068
ENSDARG00000002483	wnt7ab	3.8095	3.63342	3.1315	3.13702	3.13374	3.28264	4.25278	3.1304	3.12813	3.14174	3.49117	4.52649	3.5425	3.93735	3.48925	4.09414	3.22459	3.13046
ENSDARG00000002487	noc3l	9.71791	9.77801	9.43869	8.68377	8.26148	8.50474	8.49298	8.48835	9.02057	7.95139	7.55824	8.30493	8.55485	8.18812	8.8347	9.04936	8.62453	8.93883
ENSDARG00000002494	itgb6	5.57405	3.99685	3.9866	6.04348	5.15043	4.1683	6.07924	5.36119	5.8016	5.86269	5.27985	4.01682	5.54434	5.06046	4.27739	5.48227	5.21178	4.28147
ENSDARG00000002506	zgc:92818	6.92031	6.58625	6.80382	6.88217	8.77257	8.31288	7.11069	8.41718	7.45289	6.24054	8.04052	8.56495	7.26356	7.21838	8.44519	7.58768	7.9199	7.74297
ENSDARG00000002507	itga10	7.0705	5.89784	6.55335	8.14818	6.66119	4.85417	8.92202	6.84069	8.78828	9.4355	7.89867	6.35522	8.51956	7.82239	6.92277	8.70732	7.29797	6.80632
ENSDARG00000002508	ankrd33ab	0.950672	0.949656	0.949336	0.950078	0.949635	0.97502	1.60596	0.949188	0.948887	0.95072	0.99302	0.9503	1.36822	0.948941	0.949464	0.950349	0.94906	0.97192
ENSDARG00000002509	zgc:153911	4.6393	6.21807	4.06858	5.16008	6.38109	5.77904	4.75101	6.12111	6.69658	5.84534	7.28657	5.90543	4.87925	6.0172	5.26233	4.76923	5.92372	5.36549
ENSDARG00000002510	dmbx1b	6.10832	3.77324	3.14567	5.54984	3.15871	3.14509	5.36078	3.13907	5.32296	4.00063	3.17659	3.18612	5.51145	4.00712	3.15131	4.30798	3.34722	4.01302
ENSDARG00000002523	hsdl2	9.14896	9.34144	8.89094	8.4346	9.94172	9.22707	9.10587	9.23652	9.80708	8.55768	9.57486	9.48649	8.77892	9.63804	9.81842	8.98838	9.58335	9.45354
ENSDARG00000002533	adora2b	5.6954	5.93582	6.75035	5.64673	5.18776	4.78169	5.98008	4.80105	6.13982	6.43027	5.37678	4.50783	5.61214	5.51966	5.75948	5.28574	5.13469	5.46247
ENSDARG00000002536	tm9sf4	10.2154	10.6917	10.5063	10.174	11.2749	11.3141	10.0497	10.4882	10.8419	10.122	11.0587	11.9292	9.84115	10.7968	10.9	9.84691	10.8344	11.177
ENSDARG00000002538	smu1a	9.97903	9.43145	9.61619	9.27917	8.97063	8.95849	9.00691	8.47158	9.2226	8.52625	8.66595	9.37724	9.02144	9.14342	9.25958	8.61086	8.63206	9.11281
ENSDARG00000002546	rundc3ab	6.76567	3.24878	3.1274	8.31018	7.16025	6.76803	7.20308	6.93137	4.26617	8.40565	6.24792	6.56355	9.00153	7.03003	6.78884	8.72382	5.28174	6.02189
ENSDARG00000002549	eif3eb	6.62857	6.60523	7.59661	7.44215	7.65648	7.88611	6.95741	7.92271	7.21228	7.11338	8.50605	7.89326	7.05434	7.65032	8.17626	7.58702	7.73923	8.02779
ENSDARG00000002552	mapkapk2a	10.3321	10.2256	10.559	9.59488	10.1844	10.0215	9.74012	9.6732	9.58676	9.74833	9.60723	10.3085	9.40486	9.64124	9.80301	9.6323	10.2236	10.0042
ENSDARG00000002564	syngr1a	6.62704	4.91607	2.38577	7.48743	11.9591	11.676	7.88833	10.3943	10.4208	8.10836	10.6973	11.5996	8.67694	10.0336	11.2558	7.95693	10.5357	10.7741
ENSDARG00000002571	tmod2	9.70998	9.94397	9.52794	9.1845	9.63577	9.80968	9.86652	9.78126	9.74502	9.55311	9.50218	10.2703	9.61966	9.9262	9.18422	9.63357	9.41139	9.70013
ENSDARG00000002576	cabp5a	2.33959	2.6671	2.3354	2.33773	2.33634	2.33536	2.34021	2.33493	2.33398	3.26293	2.33769	2.61165	3.15192	2.75142	2.924	2.33858	2.33453	2.33496
ENSDARG00000002582	tbx15	7.28912	6.83522	6.55568	7.68887	6.69141	5.518	8.09907	3.81687	5.9188	8.41472	6.25088	6.33488	7.0752	5.07502	6.02743	6.9956	6.00544	5.96643
ENSDARG00000002587	dpysl3	9.7667	8.33717	8.40818	11.6435	10.1273	10.2355	10.6979	10.4204	10.0621	10.9049	9.67977	9.88832	12.0186	10.3767	10.9202	11.1842	9.94118	9.91569
ENSDARG00000002589	mylpfb	5.95797	2.88206	2.65823	7.73876	9.45186	8.61276	7.70635	8.69195	10.5566	7.04158	8.84371	9.05024	7.99062	8.62679	9.93705	7.7391	8.72598	8.53731
ENSDARG00000002591	ruvbl1	9.78915	10.0501	9.90229	10.1742	9.43964	9.27566	10.0046	9.15174	8.84364	9.36736	9.54527	10.1008	9.2612	9.20937	9.56532	9.24364	9.06597	9.68432
ENSDARG00000002593	slc45a2	8.09489	5.94757	6.00366	3.13327	9.36356	9.57211	4.3185	8.13598	5.58169	6.04567	8.96633	9.552	5.77775	8.70589	8.7841	5.81968	8.0794	8.17767
ENSDARG00000002597	pabpc1l	0.755412	0.754534	0.754257	0.754898	0.754516	0.754245	0.755581	0.754129	0.753869	0.755454	1.34608	0.755091	0.754112	0.753915	0.754367	1.1773	0.754018	0.754137
ENSDARG00000002600	pcsk1	5.0062	3.10116	5.79145	6.98298	3.09639	4.27434	6.20454	4.75619	6.46959	7.58957	4.69629	3.23119	8.51431	6.05711	3.63512	7.95734	5.03145	5.2476
ENSDARG00000002601	irx7	7.7747	6.06067	7.05765	7.54432	6.37011	5.99635	6.94564	5.90465	7.0581	7.49193	5.93059	6.44459	7.51482	5.46166	6.23472	7.64796	6.29425	4.63502
ENSDARG00000002607	unm_sa1614	7.24198	8.47601	8.75027	9.85639	10.3938	10.2068	8.04322	10.123	9.47907	8.59739	9.41941	9.91348	9.50446	9.72014	9.61795	7.86168	10.1156	10.3711
ENSDARG00000002609	rnf145a	8.16655	8.84508	8.58238	8.2482	6.00065	6.8426	7.66818	5.55428	5.62062	7.94201	6.89396	5.69392	8.10719	6.47728	5.67053	7.73145	6.83694	5.36012
ENSDARG00000002613	rpa3	4.98593	4.63591	5.09723	4.38631	4.17988	3.85583	4.51924	3.52633	3.52263	3.54466	4.71672	3.53971	4.04319	3.52329	3.52968	4.01026	4.0702	3.8663
ENSDARG00000002632	anxa11b	10.4588	10.7489	10.7746	9.79834	12.238	12.5174	10.7107	12.6042	12.2567	10.6134	12.7655	13.112	10.1047	12.3361	12.5924	10.5297	12.255	12.6564
ENSDARG00000002634	b4galt1	5.67886	5.65275	3.77352	6.04547	6.80133	6.53567	6.27562	6.50626	7.25668	7.06325	8.68124	7.19508	5.6993	5.92504	6.93736	5.13282	7.05744	7.09963
ENSDARG00000002635	zgc:85722	5.13258	3.46767	3.41099	6.80419	5.5895	4.80333	6.24467	5.24281	3.91754	7.26959	6.44789	5.82971	8.25947	6.50933	5.39028	7.82937	4.56317	5.57814
ENSDARG00000002642	sh3gl1b	9.35878	9.02296	9.41613	8.57259	8.36676	8.68438	8.91477	8.85555	9.77691	8.73035	8.56712	8.92769	9.03072	8.91099	9.16966	8.94997	8.75673	8.70542
ENSDARG00000002644	rgs5a	5.68692	3.36653	3.27446	5.52272	6.14911	6.51354	8.99247	4.46454	7.04019	8.32379	6.41477	6.03333	7.71621	6.33287	7.22962	7.23664	5.92289	5.72389
ENSDARG00000002656	stxbp5a	5.60108	4.83352	7.56709	8.59806	9.35851	8.62526	8.0815	8.81183	9.11871	7.37486	7.88198	8.32195	9.42422	8.39295	8.50057	8.5579	7.92356	8.8577
ENSDARG00000002659	mapre1b	11.6629	11.749	11.1246	11.348	11.6166	11.7419	11.2861	11.6501	10.7919	10.9978	11.0478	11.5739	10.986	11.0251	11.4331	11.0404	11.3331	11.4474
ENSDARG00000002663	optn	6.25289	5.44681	7.14627	6.67503	9.32142	9.32821	7.02618	9.92717	9.49136	7.34654	9.2126	9.84049	7.29855	9.39191	10.2013	7.24231	9.66252	9.83298
ENSDARG00000002666	kcnj1b	4.7601	3.40752	3.40427	4.39798	3.4073	3.88983	4.60815	3.40276	3.61911	3.62711	3.41161	4.27712	4.73007	3.40023	4.10501	4.26596	3.80954	3.54548
ENSDARG00000002670	zgc:113944	7.72579	8.09073	7.93243	7.57563	7.6597	7.81679	7.59302	6.85558	6.53556	8.10857	8.25363	7.53715	8.13476	8.06239	8.0458	8.16117	7.2454	6.45317
ENSDARG00000002682	tbcela	6.52467	5.98285	5.15956	7.58672	7.69125	7.62171	7.33111	7.31592	6.71699	7.48429	8.03423	6.98575	7.60832	7.53346	8.00143	7.2683	6.78197	7.18132
ENSDARG00000002690	rabif	6.16848	6.73196	6.60108	6.50214	6.84678	6.78775	6.71658	7.08272	7.13151	6.36286	7.07503	6.92636	6.28951	6.66764	6.22143	5.97847	6.15289	5.80531
ENSDARG00000002696	gnb3b	2.65355	2.1959	1.97975	4.42467	2.18332	1.96973	10.523	9.24559	10.0233	8.88219	6.46873	6.1306	9.44319	7.34806	7.1122	6.50817	4.5781	4.61562
ENSDARG00000002701	rasl12	3.77584	3.57937	3.41226	3.75267	3.63636	3.78592	4.76189	4.58789	3.31131	3.32733	3.37665	3.32371	4.30759	3.63117	3.31641	4.36845	3.82354	3.52336
ENSDARG00000002707	her11	1.72131	1.31187	1.31158	1.31225	1.52978	1.31157	1.45805	1.31145	1.31119	1.31282	1.31223	1.31244	1.57494	1.31123	1.3117	1.31249	1.52384	1.31146
ENSDARG00000002710	ncl	12.7339	12.6546	12.4315	11.7122	11.3429	11.2593	11.8899	11.9856	11.2069	11.4403	11.1905	11.5689	11.7191	12.1132	12.0304	12.5079	12.1987	12.5513
ENSDARG00000002720	utp15	8.96643	8.61132	7.5767	7.43905	7.31916	7.26043	8.09517	8.22453	7.76407	7.89073	6.98082	7.64094	7.61158	7.66804	8.17901	7.36313	7.78528	8.115
ENSDARG00000002722	ankrd2	1.80455	1.80267	1.80208	1.80345	1.80264	1.82807	1.80491	2.57121	1.80125	2.01617	1.80343	1.80386	1.80177	1.94077	1.80232	2.42043	2.14865	1.82483
ENSDARG00000002728	kiss1ra	2.13971	1.86104	1.8605	2.13982	1.861	1.86048	1.86305	1.86026	1.85976	1.8628	1.86171	1.86211	2.38919	1.85985	2.32741	2.37457	1.86005	1.86027
ENSDARG00000002731	sdc2	9.00596	9.6711	10.192	9.72153	9.96052	10.0444	10.8416	10.6141	10.329	10.5125	10.2046	10.8302	9.82261	10.6974	10.3315	9.95328	10.8802	10.609
ENSDARG00000002732	spon2b	3.6169	3.5617	4.7177	5.44236	3.95464	5.15861	7.2578	3.53371	5.53913	6.02	4.25315	5.07982	5.97673	4.05279	4.42268	5.46869	4.70522	3.92723
ENSDARG00000002745	tdh	10.9496	11.8926	11.9227	11.0193	13.2977	12.8095	10.3085	11.4056	11.482	11.135	12.3573	13.1091	10.992	11.8624	12.2384	11.6111	12.4499	12.4188
ENSDARG00000002748	sema6d	7.5393	8.09471	8.82716	8.58251	6.34898	7.78718	8.65842	7.24255	7.56586	8.72745	6.35948	7.27874	8.69062	7.58284	6.69316	8.29774	7.4997	7.33187
ENSDARG00000002750	phf20a	7.8544	6.90627	7.13512	8.97736	7.88751	8.35505	8.22525	7.57356	8.13963	8.11822	6.97572	8.6521	8.87452	7.65556	8.28676	8.59778	8.18547	8.29992
ENSDARG00000002754	pdcd2l	5.71567	5.81383	6.02934	5.86536	5.61856	5.74897	6.02101	6.13936	6.02142	5.75378	5.38164	6.4637	5.56794	5.93387	6.13054	6.09441	5.71473	6.43553
ENSDARG00000002758	dedd1	7.87402	8.83863	9.70507	9.63499	10.2899	9.65894	10.2342	10.4544	9.79821	10.7306	9.82064	9.95364	10.3856	10.0716	10.0008	9.71024	9.75772	9.46588
ENSDARG00000002760	gdf5	3.71813	3.64964	3.71009	5.29753	5.36975	5.1503	7.09202	5.42073	5.71738	6.92364	4.17816	4.9374	6.50268	4.91211	4.44861	6.32785	4.99969	3.61501
ENSDARG00000002764	miox	3.18499	3.48212	3.0249	4.00253	4.71199	3.27178	5.15821	6.7554	2.95608	3.1899	5.96356	5.14119	4.4442	7.84035	7.0576	4.00161	5.24723	5.41276
ENSDARG00000002768	pvalb2	4.68767	2.68478	2.40305	9.13351	10.8107	10.1057	8.51911	10.5006	11.8251	8.55714	11.0225	11.1495	10.0469	10.4512	11.4716	9.78804	10.4554	10.4484
ENSDARG00000002771	si:ch211-48m9.1	3.12877	2.68631	2.67875	2.69591	2.68582	2.67843	4.66084	2.67519	3.26758	3.2129	2.69559	2.70084	4.73353	3.47957	2.6818	4.07967	2.99707	3.64211
ENSDARG00000002773	htr1fa	0.99038	0.989151	1.84233	0.989661	0.989126	0.988747	1.17438	0.988584	0.988218	0.990438	0.989644	0.989931	1.25268	0.988283	0.988918	0.989989	0.988428	0.988594
ENSDARG00000002779	pdx1	3.85551	4.23544	3.35235	4.08389	3.35676	3.35216	3.8295	4.27105	5.62368	4.7617	4.07999	4.46285	3.70342	3.34647	3.35425	3.36704	4.01968	3.71253
ENSDARG00000002787	tle3a	11.3218	9.99013	10.7457	10.9431	9.95472	10.3071	10.5993	9.57959	10.2147	10.7796	9.99164	9.61869	10.8837	10.1153	9.82018	10.5229	9.74456	9.72178
ENSDARG00000002790	ap2m1a	11.3786	12.8155	12.9345	10.9509	11.5983	11.6027	10.8049	11.5533	11.0982	11.0845	11.2661	11.5075	10.953	11.1991	11.6965	10.9712	11.4181	11.4542
ENSDARG00000002791	atp1a1a.1	11.7803	11.7935	12.2536	11.3879	12.4855	12.4808	11.6702	12.2342	12.5413	11.8085	12.3683	12.1749	12.0683	12.4648	12.4323	12.2355	12.9645	12.873
ENSDARG00000002792	arcn1a	10.5353	9.97547	10.0777	10.0585	10.2465	10.404	10.3192	10.3415	10.3454	10.0892	10.2249	9.4517	10.4736	10.1505	10.1891	10.7107	9.98386	10.2061
ENSDARG00000002795	meis3	9.59812	8.57081	9.08792	8.37562	7.73511	7.05404	7.73103	5.83971	2.5419	8.94953	3.23685	6.21951	8.72983	6.98699	6.78437	8.39722	7.01424	6.16752
ENSDARG00000002798	cog8	7.03998	7.58112	7.71477	7.26112	7.91473	6.65652	6.20102	6.99564	7.08345	6.98578	7.99513	7.27967	7.32298	7.56196	6.95374	6.93444	7.76288	7.22702
ENSDARG00000002816	rasgrf2b	3.88361	4.26262	3.83188	5.55057	5.0055	5.2845	5.99441	3.82582	3.81323	6.21842	4.81954	5.56224	6.44693	5.22263	4.72216	6.26383	4.75694	4.5636
ENSDARG00000002826	cep57l1	8.26245	8.45557	8.6733	7.19094	6.83663	6.91564	7.71697	6.67445	6.3573	7.04513	7.89383	6.4772	7.09692	4.82254	5.97382	7.56577	6.29456	6.74944
ENSDARG00000002830	trmt2a	7.43939	7.64388	7.30971	6.55677	6.27929	6.46299	6.56996	6.91065	6.44386	7.02013	7.28238	6.63487	6.3924	6.63623	6.76115	7.10216	6.89058	6.6431
ENSDARG00000002831	col4a4	7.06794	4.74338	6.38077	6.16426	6.16417	5.50175	6.64327	4.1795	6.76055	6.70201	5.54233	5.1574	6.05207	5.56069	5.38702	5.79236	5.46032	5.75081
ENSDARG00000002840	si:dkey-28b4.8	9.05682	7.7386	7.68149	10.6973	8.48311	9.06883	9.78985	8.93062	9.95209	10.0567	9.36486	8.61444	10.848	8.44146	8.68984	10.0881	8.31627	8.75193
ENSDARG00000002847	fndc1	4.48958	3.64499	3.62913	5.50725	4.37631	4.51364	6.76889	5.72415	3.60589	6.2289	5.38552	3.67521	6.12902	4.83308	3.63555	4.91362	4.63266	5.10558
ENSDARG00000002872	zgc:113210	7.79154	7.05963	7.06782	8.52366	7.54091	7.15633	7.82139	7.77594	6.85838	7.60366	7.17879	7.21456	8.13062	7.229	7.26282	7.42444	6.92168	7.22754
ENSDARG00000002877	reps1	9.60883	9.60651	9.86049	9.02303	9.85014	10.1302	9.20833	9.52746	9.22785	9.35716	9.21071	9.82645	8.83087	10.2399	10.0646	8.62941	9.82809	9.79624
ENSDARG00000002880	vps50	8.04265	8.43592	7.67264	8.3853	8.58439	8.62221	8.2287	8.01372	7.76285	7.76859	7.61826	8.26249	8.63531	8.66342	7.80738	8.22711	8.19932	8.08796
ENSDARG00000002894	aven	6.77212	7.06204	6.96503	6.89733	6.15227	6.84527	7.08627	6.2624	6.001	7.16269	6.88979	7.02858	6.66995	7.06808	6.54378	6.99091	6.84868	5.92641
ENSDARG00000002897	si:ch211-160o17.2	6.97891	8.46585	6.70843	7.01888	7.26398	8.21283	7.62584	7.50542	7.5572	7.29484	7.06954	6.91251	7.45335	7.72177	7.5398	7.87847	8.00057	8.32244
ENSDARG00000002909	tjp3	7.682	6.09883	5.7587	6.75672	5.75665	5.9996	8.11961	6.59242	6.41001	6.58074	8.20658	6.30937	5.76983	6.78252	6.24837	6.14522	6.51411	6.09898
ENSDARG00000002912	adipor1a	8.64925	8.70446	8.30361	9.32127	8.9313	8.93274	9.07452	8.89149	8.94383	9.20528	9.0302	9.71603	9.39025	9.13786	9.12616	9.33763	8.68361	9.04156
ENSDARG00000002916	sec31b	9.93317	9.56715	9.79697	9.86782	9.38488	9.99643	9.79924	8.97975	9.47071	10.0917	10.392	10.2812	9.80078	10.439	10.143	8.94801	10.0542	10.2897
ENSDARG00000002917	gls2b	2.84187	2.83403	2.83152	2.95542	3.70718	2.83142	3.07573	3.21298	2.82796	2.84224	3.70496	2.83903	2.8621	4.5261	3.55641	2.8394	3.47119	3.47277
ENSDARG00000002933	gbx2	6.66432	7.9009	7.44327	7.59095	6.54436	5.27331	6.18338	6.04924	3.7145	6.85741	6.56849	5.95409	7.79077	5.90324	5.92189	7.57064	5.55216	4.92619
ENSDARG00000002937	meis1a	9.73605	8.96549	9.18753	9.39106	8.96881	9.13039	9.70773	8.16411	8.92024	9.94211	8.4623	8.55525	9.41854	7.25978	6.39336	9.82305	9.08236	8.07067
ENSDARG00000002945	bgnb	3.68269	3.54454	3.49269	6.46347	6.1293	4.05614	7.74439	5.89405	5.74027	7.50619	5.97718	4.96316	7.26449	5.34666	6.15136	7.74292	5.8038	5.08899
ENSDARG00000002947	abcd3b	6.00264	5.95057	6.82228	7.05343	5.84953	6.55013	7.26501	6.58094	7.76469	6.82435	7.45143	7.81183	7.31631	7.50571	7.41032	6.90987	7.8191	7.61651
ENSDARG00000002949	ppp6c	9.78934	10.3517	9.86224	9.34902	9.8193	9.89646	9.44911	9.17455	10.1712	9.04302	9.83851	10.4092	9.53718	9.42727	9.80341	9.3925	9.78609	10.0687
ENSDARG00000002952	smo	10.9823	10.4204	9.74448	10.029	9.24659	9.65949	10.2279	8.23363	9.11725	10.0632	8.59783	9.04743	9.58424	8.418	8.5765	9.76029	9.39697	8.77164
ENSDARG00000002956	si:dkey-32n7.4	7.23635	9.13859	8.94778	6.61534	7.65632	6.09255	6.06993	8.12398	8.01119	6.99864	8.15333	6.18767	7.30032	8.79096	8.38722	7.02405	9.11716	9.18763
ENSDARG00000002959	gpr34b	2.66677	2.80132	2.23221	2.55042	2.45948	2.98032	2.23578	2.23187	2.23116	2.23544	2.23391	2.23446	2.33396	2.23129	2.23251	2.62004	2.23157	2.23189
ENSDARG00000002967	pdap1b	6.82958	6.85735	7.30681	6.9938	7.72704	7.31048	7.47007	7.44604	8.00302	7.92539	7.95673	8.44638	7.44375	7.62772	8.03706	7.37071	7.9837	7.58159
ENSDARG00000002968	a1cf	5.84749	2.90676	5.62551	6.51435	5.65226	4.23982	7.51819	8.37241	9.04013	7.43595	8.11921	5.69985	6.12725	10.1732	9.09553	5.25265	8.08815	7.9437
ENSDARG00000002970	ss18	9.54671	8.24499	9.09854	9.7895	9.03931	9.13642	9.46745	8.65289	8.82804	9.74001	9.09572	8.77551	9.67499	8.96608	9.0031	9.61658	8.90953	9.02211
ENSDARG00000002971	phc1	9.24753	9.00714	9.27378	8.99982	8.08591	8.23828	8.71725	8.00044	7.99069	7.82995	7.67698	7.48922	8.68884	8.15916	8.12263	8.32241	8.16397	7.95448
ENSDARG00000002986	gda	2.691	3.38217	2.68639	2.73289	3.0391	2.68634	2.69167	3.31938	2.68483	2.69116	2.6889	2.68972	2.9987	3.43282	2.96163	2.91334	3.36581	2.6859
ENSDARG00000002988	tnnt2d	4.38312	4.03426	4.00663	5.92244	5.56576	5.40667	5.28919	6.99045	6.85746	5.88778	6.30953	6.61633	5.84921	7.28519	6.66622	5.44156	6.40556	6.402
ENSDARG00000002991	cep135	7.99904	8.43137	8.80957	8.88379	8.90327	8.18525	8.27758	8.52854	8.54558	7.94302	8.08393	7.95103	8.30811	8.34006	8.39664	8.2905	8.12824	8.2225
ENSDARG00000002994	itpkca	7.90551	7.41533	7.04563	8.50104	7.68678	7.09683	8.11815	7.136	8.55296	8.28008	7.97192	7.79823	8.20087	7.74337	7.58069	7.87569	6.81001	7.30472
ENSDARG00000003008	prkcea	9.44849	8.76405	8.22272	9.30988	10.9849	10.991	8.97338	11.0255	10.0188	9.49322	10.6326	11.0709	10.2209	10.6542	10.6691	9.92314	10.3909	10.4958
ENSDARG00000003017	ube2al	7.63563	7.98026	8.27524	8.29043	8.95813	8.99155	8.54855	9.4888	9.11521	8.36008	9.3897	8.97221	8.72737	8.98208	9.03705	7.87198	8.76852	9.29364
ENSDARG00000003020	lrrc4.2	4.13041	3.42792	3.41508	5.40972	4.4863	3.98987	4.16976	3.40903	3.39637	5.8835	4.7714	3.45254	6.2698	4.69609	4.98009	6.06964	3.9618	3.40938
ENSDARG00000003021	hdac8	3.59813	3.40976	3.49382	3.23986	2.98069	2.97947	3.66023	2.97894	2.97776	3.35421	2.98236	2.98329	3.60872	3.53355	3.63244	2.98348	2.97844	2.97897
ENSDARG00000003022	limk1b	7.26868	8.93126	8.57379	6.50702	7.75265	7.17505	6.31509	7.78005	6.01875	7.71708	7.54913	7.67461	6.84833	8.36403	8.95744	6.75073	8.21201	7.51137
ENSDARG00000003027	scnm1	6.46309	6.51202	5.81704	5.90036	7.21168	6.59596	6.43136	6.28616	7.06795	6.95012	5.89429	6.09212	6.11314	5.65056	6.64447	5.41626	5.95356	5.94428
ENSDARG00000003032	eif4a1b	11.6647	12.0063	11.7944	11.7858	12.3177	12.1802	11.6231	12.5603	12.5103	11.8407	12.5719	12.9801	11.9644	12.4223	13.0003	12.2767	12.527	12.4848
ENSDARG00000003035	hspa9	11.474	11.6046	11.1623	11.0348	10.7693	10.8633	11.4032	11.1998	11.2824	10.8216	11.4428	11.0268	11.1551	11.789	11.5396	10.7501	11.442	11.5497
ENSDARG00000003041		7.96564	8.78384	8.22034	7.71401	8.24474	8.37601	7.40943	6.11199	7.55491	7.0852	7.54915	8.05559	7.90887	7.84421	7.82488	7.78252	8.35136	8.31201
ENSDARG00000003046	sorbs2a	7.82224	9.17381	9.84009	9.49989	10.2551	10.6974	7.69539	8.88604	8.03619	9.30898	8.78715	7.25738	9.61206	8.12495	7.28768	9.16552	10.2321	8.59095
ENSDARG00000003054	tacr3l	2.1409	1.92281	1.922	1.92386	1.92275	2.15715	2.05228	1.92163	2.71631	1.92545	1.92382	1.92441	2.33735	1.921	1.92232	2.28728	1.9213	1.92165
ENSDARG00000003058	fgfr1op	8.12696	8.2976	7.99745	7.61913	8.10299	8.49077	7.38792	7.65487	8.94609	7.53212	7.31238	8.02585	7.83079	8.20357	8.31474	8.48261	8.02979	8.04718
ENSDARG00000003061	cd276	9.35815	9.38243	9.53259	8.61738	8.64289	7.7096	8.8677	8.62636	8.99394	8.74286	8.53406	8.63883	8.58894	8.78227	7.77701	8.8618	8.39913	8.21832
ENSDARG00000003068	gorasp1a	8.89592	9.28945	8.64417	8.36255	8.50543	8.09126	8.69519	7.24101	8.86239	8.70159	8.62511	8.34701	8.49293	8.30809	8.29362	7.59764	8.44895	8.58827
ENSDARG00000003069	btbd7	9.61236	8.97528	8.70309	9.59705	8.10945	8.5404	9.17837	9.0458	8.49424	9.151	8.52659	8.70212	9.49854	9.19104	9.19208	8.85498	8.58248	8.97755
ENSDARG00000003077	si:ch73-111m19.2	-1.11344	-1.01838	-1.1218	-1.11716	-1.1208	-1.1218	-1.03574	-1.12183	-1.12187	-1.11317	-1.11726	-1.11564	-1.12183	-1.12186	-1.12178	-1.11533	-1.12185	-1.12182
ENSDARG00000003081	mybphb	8.7635	7.16007	7.2723	8.92483	9.65768	9.66891	8.71618	8.98802	10.7995	8.54387	9.91289	9.38424	9.44957	9.74765	9.84806	9.56351	9.84419	9.5367
ENSDARG00000003084	spire2	5.0961	3.28203	3.27218	4.66719	3.28139	3.54194	4.9668	3.26755	3.60171	3.88689	3.87065	3.30107	5.96549	4.25751	4.02631	5.92784	4.22438	3.26783
ENSDARG00000003085	stambpl1	6.03211	5.69345	4.24809	6.54324	5.32577	5.85553	6.30564	6.63226	6.04908	6.46819	6.09747	4.30484	6.61675	6.09485	5.66195	6.97939	5.69049	5.90384
ENSDARG00000003087	ubxn6	8.33913	8.52878	7.50822	8.529	9.15902	9.57903	8.56028	9.57047	9.71379	8.29644	9.24286	9.92601	8.68625	9.52825	9.59312	8.66909	9.38321	9.70997
ENSDARG00000003091	oclnb	5.64499	5.26013	5.0772	6.13995	5.54671	5.69668	5.88248	3.5546	6.0667	6.33039	8.34999	7.30389	5.23492	4.45864	4.57121	5.77463	4.99595	4.29066
ENSDARG00000003098	kdm5bb	12.0434	11.5018	10.8229	12.5512	11.6016	11.7692	11.6504	11.4083	11.4697	12.1087	11.3805	11.3653	12.5519	11.223	11.3585	12.5156	11.0646	11.1552
ENSDARG00000003109	rcan1a	8.40916	9.00726	8.39332	8.53449	9.65748	9.28374	9.01009	9.42174	9.38558	8.78959	9.99625	9.51898	9.31476	9.43933	9.7323	8.3708	10.0441	9.73564
ENSDARG00000003113	ada	5.31696	6.27346	2.85851	8.50656	8.42289	7.57701	8.17166	8.52902	8.56689	7.4937	9.43385	9.2895	7.94113	9.09914	9.46918	7.88508	9.29232	9.65678
ENSDARG00000003127	zgc:123105	8.76863	9.00027	8.80576	8.16745	8.24855	8.05139	8.52273	8.78173	8.45426	8.54947	8.35548	9.07441	8.43034	8.62159	8.97821	8.88398	8.85521	9.24435
ENSDARG00000003132	apip	8.50093	9.12235	8.75797	7.518	9.27009	9.17652	8.29862	8.99793	9.58682	7.72148	9.4386	10.4922	7.75461	9.08581	9.787	8.01394	9.26259	9.2093
ENSDARG00000003142	dachc	7.43726	7.61827	7.80644	8.61153	7.74785	7.65302	8.205	6.57036	3.23051	8.4371	7.08698	7.51781	8.64206	6.98537	6.91213	8.46103	7.49458	7.21531
ENSDARG00000003144	pxmp2	4.59937	5.17729	5.47871	4.51369	5.65437	5.68238	4.68568	4.19861	5.86271	5.72623	5.27747	5.83853	4.57171	5.5145	6.0153	5.09816	5.08137	5.50177
ENSDARG00000003146	si:dkey-27m7.4	2.22337	2.10626	2.10547	2.10729	2.10621	2.10544	2.28733	2.25688	2.10436	2.27798	2.10726	2.10784	3.13418	2.1045	2.10579	2.54752	2.38005	2.48082
ENSDARG00000003151	skp1	11.4957	10.8859	10.881	11.2286	12.0597	12.0562	11.0132	11.7297	11.5968	10.9455	12.1247	12.603	11.3503	11.4152	12.2232	11.7769	11.6263	12.0285
ENSDARG00000003153	nudt21	8.54776	7.94416	8.23103	8.32969	8.1341	8.43306	8.44625	7.79538	8.11625	7.42224	6.981	8.33343	7.89489	7.34958	7.76493	8.03374	7.69937	7.86132
ENSDARG00000003157	nfkbil1	5.16383	5.67198	5.48585	5.41206	4.35585	5.56301	4.65976	4.86897	5.23876	5.11604	5.12042	4.23516	6.10012	5.35019	5.04681	5.41782	5.18724	4.96062
ENSDARG00000003165	nr2f6b	9.55487	7.94104	8.51428	7.37752	7.89331	8.06359	7.80122	8.77625	8.04871	8.06815	8.55148	7.88362	7.69899	8.06231	7.83916	7.38425	8.36331	7.92972
ENSDARG00000003167	mlst8	8.09771	8.58092	8.33934	7.96048	8.425	8.48431	7.74704	8.38461	8.5733	6.58206	8.40972	8.05184	7.66132	7.59145	8.18004	7.83629	7.64779	7.83465
ENSDARG00000003169	magi1b	10.8211	8.98434	9.08776	11.2689	10.5813	10.617	10.332	10.4584	9.95994	10.8821	10.4599	10.7338	11.4292	10.1339	10.4737	11.2866	10.2472	10.3935
ENSDARG00000003175	stx5al	8.55828	8.67157	8.01611	8.23171	9.13218	9.35017	8.51189	8.61126	9.42139	8.89909	9.73184	8.43872	8.25437	8.72958	8.95219	8.55375	8.79618	9.01775
ENSDARG00000003181	sult1st4	2.09427	2.09243	2.09185	2.09319	2.09239	2.51617	2.09462	2.09158	2.09104	2.09435	2.62287	2.09359	2.09155	2.39898	2.41435	2.36388	2.52762	2.13222
ENSDARG00000003189	psmd1	12.2859	12.2356	12.0243	11.7283	11.5338	11.7145	11.2612	11.2273	11.9193	10.9374	11.5623	11.2055	11.338	11.4764	11.5667	11.5119	11.3705	11.4791
ENSDARG00000003193	rassf7b	6.28603	4.42234	3.73859	6.66449	6.00445	5.79882	6.69016	3.71822	7.02224	7.08717	7.84014	7.1135	6.00967	3.68218	5.88405	6.13071	5.7295	5.55962
ENSDARG00000003197	wdr21	6.60239	6.66155	4.21236	6.69752	6.97139	6.52403	6.07177	4.19703	6.38705	6.57444	7.11454	6.53241	6.82507	6.26341	6.54038	7.06789	6.63107	6.69622
ENSDARG00000003200	foxm1	5.63222	4.81838	4.06626	4.75022	3.73194	3.96302	4.98821	3.52067	3.51511	3.7263	3.53641	5.16657	4.57364	4.77991	3.5257	3.69694	3.85035	3.87101
ENSDARG00000003203	rhcga	3.22861	3.19877	3.18879	3.21146	3.95106	4.54376	3.58629	3.18409	4.82547	4.66376	5.69772	5.33438	3.9763	3.17607	4.23823	3.21939	4.17127	3.94832
ENSDARG00000003205	ngly1	7.91441	8.35497	8.2736	7.86219	8.37175	8.6087	7.88575	8.55412	8.48914	8.02362	8.02666	8.34145	7.80648	8.38095	8.3437	7.18373	8.46309	7.92905
ENSDARG00000003206	chchd6a	6.35848	7.24254	7.54563	6.8202	7.1951	6.24645	6.87471	7.47909	4.46429	8.0791	6.62998	7.22426	7.2858	6.95919	7.37377	7.26742	7.15249	6.83343
ENSDARG00000003207	mterf3	6.19377	7.0726	6.65572	6.34212	6.21982	6.31741	6.81795	5.31498	6.76654	7.30943	7.21163	6.61124	6.42363	5.56734	4.73935	6.98955	6.37638	6.28281
ENSDARG00000003208	pomk	6.73934	6.13064	5.64572	6.86274	6.30323	6.7349	6.86849	6.69385	6.71459	7.32611	6.23268	6.71464	6.85334	6.12538	7.13472	6.32265	6.60894	6.32908
ENSDARG00000003210	si:ch73-86n2.1	3.26287	3.05786	2.97491	6.77752	5.34839	5.05882	7.05485	5.89865	7.74663	7.94842	5.19384	3.63369	8.18138	4.97738	3.19729	7.66802	4.51126	5.58987
ENSDARG00000003213	naa15a	11.5367	11.7499	11.831	10.7786	10.7994	11.0523	10.5554	11.0163	10.7491	10.3575	10.6174	10.7097	10.4984	11.1473	10.9669	10.7472	11.1521	11.2779
ENSDARG00000003216	anxa2a	6.06527	4.4716	6.08168	7.24607	9.22867	7.78833	9.35677	9.82623	9.81418	8.60666	11.0379	11.0195	8.35501	10.5281	10.8856	8.50551	10.5924	10.0778
ENSDARG00000003217	urb2	9.74913	10.9887	10.9947	8.55743	8.51287	8.2889	8.38848	8.3523	8.19498	7.50177	8.03298	8.55354	8.12219	8.79173	8.45065	7.01008	8.32775	8.7559
ENSDARG00000003219	bin2a	5.70908	3.90981	3.87292	5.71265	5.62818	3.87137	5.77602	6.91533	7.44175	7.07556	7.30581	5.68411	5.60249	6.45036	6.55022	5.92417	7.01021	6.51084
ENSDARG00000003229	gdf9	0.0107677	-0.353091	-0.353188	-0.352962	-0.353097	-0.353192	-0.347965	-0.353233	-0.353324	-0.349297	-0.352967	-0.352894	-0.315467	-0.353308	-0.353149	-0.35288	-0.353272	-0.35323
ENSDARG00000003235	nup88	8.99024	9.22195	8.80276	8.6141	7.76533	8.74443	8.7919	8.20222	8.34342	7.8229	8.48588	7.78808	8.67349	8.64876	8.41468	8.56983	8.5334	8.31983
ENSDARG00000003244	gbp3	7.53521	8.03298	6.43973	7.48445	9.2843	8.95136	8.43284	8.8518	8.52689	7.98034	7.605	8.86135	7.67258	8.96959	8.80819	8.10638	8.57529	8.835
ENSDARG00000003250	pik3cd	4.81667	7.30243	6.96222	5.96804	6.1158	5.51688	6.08573	6.32553	4.15225	5.21656	6.40192	6.6304	6.72779	5.52867	6.60661	6.3927	6.70135	6.04673
ENSDARG00000003251	zbtb22b	8.48946	7.85349	8.26493	8.49609	8.08829	8.00258	8.54564	7.41214	6.50363	8.39492	7.48824	8.07313	8.47569	8.10992	8.28671	8.6055	7.68349	7.78194
ENSDARG00000003257	zgc:101559	5.37008	6.34463	4.24875	5.73051	5.20106	4.50922	5.12618	4.91947	5.78275	5.95255	5.5716	5.9422	5.66543	5.59443	5.62177	5.25152	4.94309	4.95789
ENSDARG00000003259	loxa	3.83874	3.79798	4.25516	5.07807	4.77014	4.88397	6.91846	6.06711	3.76441	5.91753	5.23037	4.18463	5.23	5.20292	4.96532	5.55474	5.14858	4.26883
ENSDARG00000003269	clcn3	10.0036	9.87909	9.82358	10.2381	10.7109	10.5417	10.0053	10.5518	10.2951	10.1679	10.7611	10.5828	10.4413	10.9188	10.5643	9.90214	10.5181	10.4715
ENSDARG00000003270	dhps	8.25493	8.60389	8.70641	7.37002	7.58144	7.54428	7.44363	7.71467	7.22638	6.81084	7.88786	8.52276	7.68317	7.76174	7.53014	7.26957	7.59176	7.76039
ENSDARG00000003281	pik3ip1	7.2708	7.88284	7.12976	7.78051	8.09805	7.11568	7.36411	7.36707	8.62394	9.01601	9.30662	9.31135	8.65433	8.49501	9.37108	8.88878	7.97077	7.95075
ENSDARG00000003287	wdr12	8.30231	8.66158	8.29122	7.7863	7.56817	7.57578	8.00371	7.62364	6.76752	7.74747	6.99942	7.60734	7.42592	7.6066	7.59243	7.81063	7.97131	7.74752
ENSDARG00000003290	dab1b	6.49749	5.2467	3.76638	8.31001	5.97035	6.42666	7.57322	4.32271	6.40819	7.0648	5.5416	6.85126	8.55059	6.26758	6.38092	7.96165	5.32976	5.60901
ENSDARG00000003293	sox9a	9.75203	8.66113	8.70806	10.7582	8.91061	9.31145	10.9687	9.28456	10.532	11.6327	9.72733	9.37609	11.133	9.12968	8.74472	11.4843	8.84613	8.71625
ENSDARG00000003303	stc1	2.52872	2.52526	2.55197	2.76905	2.52519	2.52412	2.98118	2.52366	2.52263	3.47522	2.52665	2.52745	3.09177	2.79263	3.05401	3.21381	2.52322	2.52369
ENSDARG00000003307	stx16	8.94689	9.0899	8.66144	8.72828	8.69742	9.09661	8.32948	8.70504	8.34905	8.39928	7.81323	8.23193	8.97876	8.683	8.74224	9.11499	8.37743	8.34365
ENSDARG00000003308	emc2	9.64766	9.46437	9.27311	9.45321	9.78446	9.58979	9.73783	9.65573	8.97299	9.61861	9.86798	9.75452	9.53823	9.24922	9.95268	9.46453	9.67688	9.80771
ENSDARG00000003311	pank2	8.33552	8.89284	9.16616	9.89223	9.32141	9.24921	9.19948	9.99841	9.24408	10.3924	9.50699	9.72812	10.1833	9.07442	9.76182	10.431	9.24286	8.67118
ENSDARG00000003313	eps8l1b	3.49764	3.4736	3.46569	4.79239	3.89078	3.46537	4.86885	3.46199	4.9554	4.82667	6.2191	4.64511	4.23573	3.81668	4.48417	4.10128	4.49924	3.77393
ENSDARG00000003320	fam91a1	8.324	9.01254	8.6494	8.6177	9.1112	9.03286	8.4367	8.58312	8.91217	7.93679	9.28922	8.66112	9.04699	8.84751	8.9164	8.59473	8.91221	8.94832
ENSDARG00000003326	cacng5a	1.05614	1.05506	1.05472	1.05551	1.05504	1.05471	1.22633	1.05456	1.05424	1.05619	1.05549	1.05574	1.74869	1.0543	1.05486	1.41555	1.05443	1.07715
ENSDARG00000003328	slf2	8.79927	9.0867	9.17776	8.3944	8.39319	8.28311	8.43351	8.74346	7.90645	8.1354	8.01604	7.93981	8.36433	8.61229	8.31556	8.49089	8.43269	8.23347
ENSDARG00000003344	trpc2b	2.19328	2.79392	2.18972	2.93403	2.19052	2.18969	2.47391	2.18933	2.18852	3.02839	2.19167	2.1923	2.27883	2.31961	2.19007	2.19243	2.18899	2.43783
ENSDARG00000003373	commd2	8.03093	8.37543	8.61928	7.60492	8.44097	9.07627	7.96112	7.98631	8.13526	7.26782	8.16452	9.15047	7.33923	7.89517	8.19601	7.15378	8.12474	8.47427
ENSDARG00000003375	gng12a	7.05515	6.96665	7.07897	7.01115	7.05997	7.45096	7.96448	7.19115	6.45815	5.94467	7.43736	7.77802	6.48723	7.42302	7.8999	6.63871	8.05686	7.82434
ENSDARG00000003380	si:dkey-275b16.2	4.79777	5.64732	5.64525	6.62067	6.08262	6.32897	6.02072	6.48991	4.6993	5.35418	5.92172	5.92857	6.7105	6.53072	6.17753	6.00244	6.23973	5.80651
ENSDARG00000003381	si:ch211-266g18.6	5.00047	4.2379	4.01661	4.74832	4.52973	4.84878	5.0486	5.51996	5.21286	4.96372	4.72061	5.35964	4.66941	4.54483	4.01821	4.59494	4.56278	4.2775
ENSDARG00000003382	cwc25	8.8385	8.01349	9.40387	8.72776	8.13606	8.5325	8.41622	8.46141	8.94557	8.72001	8.75182	8.44799	8.71238	8.85909	9.07221	9.08733	8.35917	8.58701
ENSDARG00000003383	asb8	5.91656	6.47305	6.73329	7.75802	8.01201	7.67975	7.63906	8.66834	6.36982	7.89208	8.12258	8.47056	7.90427	7.14754	7.87328	7.01252	7.12258	7.37202
ENSDARG00000003395	col4a3	4.82626	3.5469	3.54337	4.88195	4.608	4.1001	4.84391	3.54174	3.53838	4.70497	3.95608	4.17015	3.87887	3.91157	3.54479	4.04442	3.86284	3.90738
ENSDARG00000003398	rbpja	9.77012	9.50472	8.7597	9.48364	8.75679	8.60845	9.47268	9.23941	8.77926	9.02157	9.17395	8.74548	8.96962	8.85195	8.22987	8.45153	8.73985	8.74402
ENSDARG00000003399	fgf8a	5.83057	4.82659	3.43015	4.02139	4.4168	4.33514	4.09624	3.42753	3.42212	3.45392	4.93706	4.11184	3.99664	3.42309	3.43241	4.29887	3.94585	4.06725
ENSDARG00000003403	tenm1	7.55513	6.83116	7.32777	9.78537	8.49965	9.22473	8.58795	8.72876	8.5017	10.0266	9.40089	9.10388	10.8974	9.04449	9.352	10.9224	8.84576	9.01883
ENSDARG00000003411	foxa2	6.32816	4.98166	3.92709	6.68495	3.9473	5.2555	6.58827	6.69436	6.22621	6.37344	5.73303	5.0968	5.97508	5.85801	3.93584	6.29505	4.94583	4.04201
ENSDARG00000003414	capslb	0.667084	0.666116	0.665809	0.666518	0.666096	0.665797	0.951838	0.665668	0.66538	1.41548	0.666504	0.66673	0.665649	0.665432	0.665932	0.666776	0.665546	0.665677
ENSDARG00000003420	chrna5	4.50551	3.27353	3.26446	4.53841	4.23442	3.32385	4.62621	3.26021	3.25138	5.18275	3.28473	3.57348	5.86251	3.94514	3.26812	5.80745	3.68538	4.02339
ENSDARG00000003421	igf2bp2a	8.05329	7.68712	8.36451	8.34698	8.79015	9.00294	9.53891	8.21527	9.70611	9.14928	9.07264	8.32138	9.28943	8.966	8.99453	9.49037	9.1964	8.60698
ENSDARG00000003429	hnrnpdl	10.3331	10.3675	10.1133	10.8113	10.3794	10.4492	10.6601	10.6216	10.3791	10.1351	9.82757	10.2464	10.2592	9.52722	10.1832	10.3966	9.93165	10.1025
ENSDARG00000003444	dhrs7	6.96605	6.66249	7.52823	7.24862	7.22372	6.55955	6.3247	7.21118	6.41425	6.57209	7.615	7.6927	6.85622	7.32511	6.78549	6.97528	6.92391	6.33655
ENSDARG00000003446	ippk	8.98711	8.11493	8.22431	8.15497	8.67069	8.3595	8.30803	8.99492	8.68144	7.73557	8.86298	7.88942	8.36586	8.78447	8.9698	7.76118	8.91464	8.97731
ENSDARG00000003449	pde10a	7.52649	9.32762	9.46729	8.21768	8.76827	8.90295	8.35109	9.34437	8.0853	8.5142	8.93157	9.17251	8.88746	9.10968	8.86397	8.63866	9.18614	9.23681
ENSDARG00000003462	fech	11.1463	13.394	13.9402	10.0936	9.70308	9.90014	8.64183	9.00688	9.01358	8.66042	9.13531	9.90451	8.35997	9.34793	9.4338	8.77634	8.92344	9.51488
ENSDARG00000003469	neurod4	9.24458	2.79955	2.56022	10.6117	7.75517	9.04365	9.40992	8.16999	8.41854	10.3441	9.08897	8.14769	9.7907	7.19575	6.33185	9.85029	7.2766	7.99418
ENSDARG00000003475	sult1st5	2.91215	2.87992	2.4463	2.65559	2.83945	2.44627	2.64933	2.44596	2.44529	2.44941	2.44793	2.44846	2.84197	2.44541	2.44658	2.83571	2.44568	2.91013
ENSDARG00000003486	ppp1caa	11.1448	11.2011	11.0892	11.055	10.8732	10.8479	10.837	10.4727	10.8848	10.6655	10.6579	11.0025	11.0535	10.7711	10.8443	10.8202	10.7854	10.6094
ENSDARG00000003487	nup93	10.3928	10.8989	10.5806	9.51253	8.57636	8.92225	9.40988	8.54844	8.75934	9.43988	8.57335	8.51993	9.54044	8.63711	9.19871	9.22922	8.71493	9.00927
ENSDARG00000003495	madd	9.47606	8.58862	8.02367	10.4359	9.42732	9.47518	9.86515	8.39161	9.19644	10.3386	9.82765	9.3975	11.2382	9.34097	8.98204	10.669	9.60134	9.7727
ENSDARG00000003512	anks1b	8.88829	10.124	10.4129	9.57853	10.4515	10.5654	9.22295	10.2035	9.71414	9.28602	9.29377	9.7676	10.0944	9.90278	9.57904	9.49012	9.6763	9.65695
ENSDARG00000003517	impa1	5.74289	5.38253	6.5718	7.49904	8.4516	8.06507	6.53289	7.63926	6.20498	6.65755	8.18609	7.45697	7.25585	7.4047	8.08389	7.55919	8.1058	7.45178
ENSDARG00000003519	aprt	7.96293	8.18595	7.81252	6.9767	7.13345	6.98557	7.59653	7.89396	6.80154	7.74201	7.80539	8.02573	6.64731	7.50813	7.87856	6.56486	7.59683	7.86069
ENSDARG00000003520	tbc1d14	6.02444	5.82808	6.33605	6.41527	6.52965	6.71109	6.85748	7.11522	8.19833	7.65607	7.02425	6.52313	6.9354	6.35321	7.04304	6.6408	7.14956	6.99063
ENSDARG00000003523	itln3	0.842512	0.84182	0.841603	0.842107	0.841806	0.841594	0.842646	0.841503	0.841299	0.842545	0.842097	0.842259	0.841489	0.841335	1.19808	0.842292	1.17587	1.07642
ENSDARG00000003526	psma5	10.4984	10.6026	9.82918	9.47464	10.1832	10.1197	10.1323	10.3223	10.2001	9.40435	10.3095	9.82521	9.52334	9.4342	10.6847	9.63076	10.1927	9.97304
ENSDARG00000003527	mak16	8.62402	8.07249	9.24867	8.11765	8.47331	8.14359	8.62858	8.45247	8.50981	8.03169	7.54263	8.87314	7.79752	8.14723	8.23439	7.87574	8.73196	8.92736
ENSDARG00000003531	tcea1	10.0853	9.58503	9.52552	10.0042	10.1479	9.92132	10.0537	10.0892	9.46086	9.26666	9.64591	10.1557	9.60329	9.3983	9.60558	10.0213	9.52433	9.63274
ENSDARG00000003533	col8a1b	3.72942	3.70624	3.69877	3.92428	3.70575	3.69847	5.5225	4.32194	6.27672	6.43568	5.82876	4.48957	5.21369	4.08523	4.83493	5.35681	4.49363	3.73501
ENSDARG00000003544	adarb1b	8.07318	7.38876	7.40096	8.62088	7.23725	7.35268	8.0895	7.0799	8.27799	8.55274	8.22666	7.77721	9.03406	7.6847	7.90359	8.64993	7.31861	7.64556
ENSDARG00000003553	gnrhr2	0.4657	0.465136	0.464958	0.46537	0.465124	0.464951	0.46581	0.464876	0.46471	0.465727	0.465362	0.693094	0.503264	0.9132	0.465029	0.46552	0.464805	0.48493
ENSDARG00000003564	dohh	7.50848	8.13774	6.02386	6.13709	7.37993	7.31289	7.43874	6.79196	3.86522	7.08234	6.88392	7.30071	6.80816	7.80679	7.55234	7.09352	7.48455	7.31152
ENSDARG00000003570	hsp90b1	11.0609	11.5418	11.8403	12.4508	11.7179	11.6831	12.977	12.4226	12.7842	12.0947	12.233	11.3392	12.4389	13.1884	11.7206	12.3134	11.9658	12.2022
ENSDARG00000003573	dctn5	6.68068	7.14444	7.4502	7.15929	8.71757	7.77111	7.50085	8.04152	7.46003	6.53378	7.92458	8.14285	7.63056	7.49529	8.12856	7.06439	8.00092	8.05719
ENSDARG00000003576	klhl32	5.02085	5.19237	5.9768	6.03322	7.74644	6.72608	6.43894	6.94012	7.22554	5.48707	7.15451	6.24896	6.76223	7.09741	8.08199	7.40295	7.03615	7.52922
ENSDARG00000003584	pla2g7	7.25008	7.23021	7.30033	7.00243	8.16732	8.13068	7.3531	8.07672	7.91022	8.11808	8.43551	8.96855	6.65885	8.10824	8.51255	6.49204	8.20288	8.10084
ENSDARG00000003592	surf1	7.38377	6.13863	7.95397	7.17176	7.10672	7.36558	6.92096	5.41824	7.44891	7.47132	7.15478	5.91877	6.6187	6.48609	7.16949	7.33394	7.32387	7.4094
ENSDARG00000003599	rpl3	14.8747	15.1246	14.8848	13.9174	14.7166	14.6322	14.1827	14.9136	14.9122	14.1716	15.1346	15.1825	13.8229	14.5752	14.9065	14.5673	14.8238	14.9337
ENSDARG00000003607	nr2f6a	10.6357	10.2844	9.94688	10.1897	9.94752	9.98021	8.85598	9.99202	9.73752	9.55309	9.14343	10.0725	9.4366	9.43151	9.95264	9.73909	9.48217	9.5335
ENSDARG00000003615	slc26a3.2	3.71519	4.68853	4.08082	3.51899	3.98677	3.75119	3.61385	4.20576	4.83399	3.54161	4.5546	3.46835	3.85886	3.99185	3.46113	3.68458	3.89333	3.7213
ENSDARG00000003616	arih1	9.14023	9.51498	9.2493	9.33088	8.90969	8.99083	9.47471	9.01952	9.1035	9.40206	9.01043	8.56519	9.23357	9.18545	8.15527	8.76486	8.71539	8.57497
ENSDARG00000003631	clockb	9.12616	8.55087	9.20408	9.58873	8.87006	8.98493	10.0208	9.09593	8.97468	10.0333	9.5518	9.24526	9.9417	9.12071	9.40075	10.1653	9.49492	9.36549
ENSDARG00000003632	zgc:172270	1.96588	1.96376	1.9631	1.96464	2.06015	2.56212	1.96629	1.96279	1.96216	1.96598	1.96461	1.96511	2.12556	1.96227	2.39019	1.96521	2.78244	2.25156
ENSDARG00000003635	mogat3b	5.70924	6.63186	5.59805	6.16584	5.60895	5.40338	6.046	5.4549	6.83094	6.99621	6.47874	6.07846	5.70905	7.11687	6.48509	6.16907	6.37846	5.89518
ENSDARG00000003641	tfg	9.50722	9.67914	9.2224	9.18583	9.75673	10.1318	9.35753	9.08586	9.58808	9.4217	8.87123	9.09612	9.62906	9.88244	9.55174	9.3414	9.74931	9.62168
ENSDARG00000003642	zfyve19	7.43078	7.47286	7.8274	5.58953	7.89748	8.18378	7.16683	8.35879	8.64765	7.11824	8.05061	7.81895	7.70667	8.3608	8.15276	7.89641	7.93285	7.83085
ENSDARG00000003655	tmem59l	6.97726	6.7506	6.49847	9.23031	8.82217	8.52247	7.4757	8.30034	7.94231	9.48244	8.44416	8.21359	10.0113	7.66442	8.25684	9.9045	7.92688	8.05654
ENSDARG00000003675	cryl1	6.91848	8.35164	7.88575	4.18803	8.94993	8.51384	6.78374	8.35816	8.19826	5.49908	8.06809	8.08158	6.7618	8.52286	8.16687	6.51393	8.14367	8.34356
ENSDARG00000003680	runx1t1	9.52371	10.1044	10.1795	11.2502	10.2723	10.4272	10.2421	9.57204	9.10447	11.1669	9.23573	8.96563	11.4915	8.54607	8.557	10.5369	8.34493	8.47803
ENSDARG00000003681	eif5	11.6164	12.2738	12.6172	10.9952	11.2965	11.2794	10.9645	11.9503	11.427	10.9025	11.3303	11.3403	11.0357	11.4971	11.6652	11.3961	11.2459	11.5791
ENSDARG00000003684	obsl1a	7.43589	8.16403	9.20018	5.80577	9.70757	10.0973	6.63039	8.48439	8.79391	5.87021	6.87393	3.31235	7.17199	7.9134	7.99742	7.00561	9.68863	8.52285
ENSDARG00000003693	hars	9.2867	10.2119	10.2354	8.57619	8.43794	8.48864	8.21558	9.47237	8.53279	8.31969	8.75965	9.15686	8.86966	8.95137	8.61735	8.71272	9.01361	9.17301
ENSDARG00000003695	vdac3	10.4291	9.83799	9.88789	10.8355	12.3503	11.9068	10.866	12.1308	11.6647	10.9644	12.1862	12.6587	11.2258	12.0058	12.2367	11.3132	12.079	12
ENSDARG00000003697	slc5a8l	3.80856	3.37646	3.10372	3.48261	3.10618	3.10362	3.4549	3.10251	3.10002	3.11496	4.70236	3.76147	3.40045	3.20717	3.98579	3.11197	4.35436	3.70574
ENSDARG00000003699	atp7a	9.2682	9.80086	9.82511	8.89278	10.4923	10.7574	9.16066	9.95208	9.42939	8.93043	10.1908	10.0456	9.1864	10.4955	9.81177	9.1397	10.5255	10.5653
ENSDARG00000003701	cldng	3.13434	4.38371	4.69076	3.67654	2.52339	2.80553	2.55104	2.51248	3.97536	2.5479	2.53338	2.53872	3.29299	2.50621	2.51927	2.5398	2.50925	2.57376
ENSDARG00000003705	prnprs3	9.10319	9.35134	9.19638	9.81243	10.7001	10.8707	9.34808	10.1809	10.1967	10.0191	10.3196	10.2387	10.6956	10.4609	10.4929	10.2155	10.5369	10.2474
ENSDARG00000003706	ryr2b	6.36519	10.0137	10.9241	5.17197	11.6071	11.6544	6.88738	10.9312	10.4911	5.06348	10.3752	7.50843	5.0891	9.13498	7.94074	6.38395	12.0333	10.4198
ENSDARG00000003732	mitfa	7.98984	7.42373	6.90349	4.69113	10.9946	11.1275	3.24528	9.23532	9.2051	6.4957	8.92368	11.0155	4.38235	9.7511	10.4175	5.09376	9.93212	9.89423
ENSDARG00000003749	polb	9.06399	8.63582	7.96144	9.40154	8.72587	8.53356	8.77639	8.54635	9.23514	8.71324	8.39481	6.83096	9.11896	8.00085	7.74768	9.34254	8.22742	7.70698
ENSDARG00000003750	pfas	10.1367	10.0381	9.71484	7.94342	13.9462	14.2085	8.45972	13.0266	12.3692	7.87345	13.1783	14.1012	7.43805	13.1544	13.3913	6.75756	13.1151	13.3875
ENSDARG00000003751	lats1	9.34654	9.34749	9.55092	8.8792	8.39911	8.81229	8.41356	7.24809	8.19497	9.05402	8.76113	7.83582	8.68446	8.3838	8.04533	8.23711	8.66613	8.3171
ENSDARG00000003754	tspan2a	8.44456	9.81744	10.178	8.49177	7.56541	7.82793	8.92486	8.42481	5.19754	8.87287	7.57343	8.50357	8.83973	7.84659	8.04645	8.18397	7.17429	6.91587
ENSDARG00000003757	cnpy1	7.42582	7.32899	7.16159	6.83281	7.69595	7.49932	7.98494	8.63102	8.06321	7.48379	8.47981	8.43032	6.80966	8.11592	7.79952	6.03021	8.42247	7.86788
ENSDARG00000003769	tada2b	7.14424	7.29258	7.38514	7.51535	7.00886	6.49988	7.0636	7.10711	6.96468	7.40832	6.72882	6.98839	7.07682	6.50803	6.40299	6.79181	6.26595	6.00018
ENSDARG00000003776	pip4k2aa	8.59974	9.51173	10.518	9.1577	9.24038	8.94248	9.22588	8.84907	8.98496	9.58101	9.25609	8.37682	9.47832	8.88442	9.34604	9.16653	9.42534	9.01439
ENSDARG00000003779	ctnnd2b	10.6711	6.79117	7.25604	10.764	8.80842	8.98146	9.23365	8.7919	9.80235	9.61898	8.70271	7.99679	10.9737	8.86348	7.89462	10.6239	7.51643	7.28111
ENSDARG00000003789	dennd5b	10.363	9.08515	8.16743	10.3507	9.09272	9.39157	9.67704	9.19695	9.67001	9.84981	9.4841	8.96787	10.5786	9.94575	9.49765	10.0274	9.23216	9.09562
ENSDARG00000003795	idh2	11.8882	11.623	10.8816	11.4092	11.957	11.6707	11.6489	12.0024	12.0232	11.0069	12.2039	11.8944	11.4673	12.031	12.2869	11.8098	12.1868	12.126
ENSDARG00000003797	asb2a.1	3.64616	3.53032	4.20754	3.94343	3.56326	4.23574	3.75864	3.78107	4.1543	4.17291	4.30446	3.53421	3.79261	3.89801	4.37436	4.04802	4.14657	3.57249
ENSDARG00000003803		4.90354	3.89406	3.87175	6.72789	5.12606	5.50393	6.65547	5.1461	5.81019	6.53318	5.77596	4.80097	6.86335	5.00993	5.6545	6.72628	4.89459	3.92873
ENSDARG00000003808	aqp3a	7.81204	6.05689	7.93703	8.30303	12.5721	12.0831	10.4195	13.3619	12.9403	9.70466	12.4366	13.5879	8.39018	12.3549	13.3313	8.2851	12.6605	12.8976
ENSDARG00000003811	plxnb2a	10.525	10.2778	10.4459	10.1929	9.63307	9.77445	10.7	9.37632	9.68334	11.1033	9.94866	9.56526	10.3639	10.0539	9.8735	10.5197	10.3908	10.1673
ENSDARG00000003818	prkag1	8.89942	9.80353	10.4264	9.37577	9.44905	9.68022	9.53959	9.99192	8.85169	9.17321	8.90119	8.38762	9.1931	9.26901	9.15406	9.20945	9.32924	9.41445
ENSDARG00000003820	nr1d2a	6.08982	6.52779	6.5181	9.5201	10.2425	9.50289	9.92221	9.82533	9.59348	10.171	9.63143	9.42886	10.334	10.165	10.0275	10.6671	10.7291	10.3965
ENSDARG00000003822	ankrd16	6.28233	5.76971	7.27762	6.48462	7.14245	6.67001	6.07668	7.31292	6.98826	6.60017	6.76777	7.1663	6.23437	6.34498	6.80581	5.77939	6.25206	5.32117
ENSDARG00000003827	snapc1b	7.16082	7.88189	8.14552	6.82001	6.49458	6.90607	7.32719	7.41936	7.56747	7.02227	6.89665	5.44295	7.10983	5.6211	7.32537	7.52952	7.38051	7.24287
ENSDARG00000003829	galnt2	9.53511	9.25681	8.65411	9.21397	9.2286	9.36622	9.48054	9.0685	9.15733	9.67471	9.46338	9.42211	9.56687	9.6522	9.36958	9.13209	9.38987	9.70192
ENSDARG00000003835	stom	10.1648	10.6961	10.4004	10.0111	12.8892	12.8768	10.9058	12.8292	12.3561	10.9918	12.8481	13.6494	10.6943	12.6677	13.1681	11.0942	12.7082	13.011
ENSDARG00000003841	usb1	6.22003	6.25812	6.023	6.27956	5.88435	6.40708	6.4073	6.70073	5.65983	6.70149	5.56856	6.32144	6.05449	6.03289	6.42794	5.71795	6.26633	6.01108
ENSDARG00000003845	chm	8.32074	9.35946	9.34035	9.04423	8.83517	8.65773	8.44744	9.39486	7.69066	7.63643	8.89142	8.34388	9.11086	8.87101	8.70873	8.66644	8.74971	8.53709
ENSDARG00000003846	mrpl21	7.01307	8.15497	7.79751	7.84713	8.00901	7.00092	7.37347	7.86538	7.83071	7.88717	7.82638	7.27413	7.2318	7.5944	7.53281	7.49165	7.39925	7.33781
ENSDARG00000003854	acsl1b	9.017	9.49021	10.5941	8.81884	9.30999	9.53393	9.39756	8.89322	9.42708	8.95025	9.29179	8.62109	8.55001	9.26894	8.7821	9.14781	10.0459	9.27572
ENSDARG00000003860	cbx3a	10.591	10.7736	10.4356	9.78808	9.79596	9.04258	9.7811	10.0543	9.89666	9.12769	9.51869	9.75882	9.39383	9.37469	9.55003	9.65387	9.43019	9.99525
ENSDARG00000003865	pard6b	5.92527	6.43788	6.11064	6.07401	5.71019	5.71417	5.77984	4.66416	6.97694	5.98095	5.60778	5.6272	5.5389	6.00446	5.9022	5.30976	5.56936	5.35618
ENSDARG00000003866	tm9sf2	10.8352	10.8815	10.309	10.641	11.0647	10.925	10.549	11.0739	11.1211	10.6985	11.0665	10.7648	10.6446	10.6344	10.734	10.1373	10.766	10.6759
ENSDARG00000003867	cdk20	4.88238	3.91453	3.9004	5.56295	5.59509	5.37241	5.4762	5.95192	3.87989	6.60275	3.9319	5.23978	5.70305	5.30656	3.9061	6.51649	5.4904	5.33535
ENSDARG00000003869	decr1	7.68168	7.37847	7.90622	6.96694	7.87127	7.19045	7.98109	7.98965	8.29066	7.29531	8.01453	7.34264	7.13087	8.12016	8.25219	7.47175	8.11014	7.68866
ENSDARG00000003872	ccdc102a	8.54375	8.13422	8.16511	8.83096	8.24721	7.60408	8.94333	8.22636	8.56259	9.13782	7.42123	6.86043	9.18264	7.65666	7.59359	9.30076	7.48875	7.25997
ENSDARG00000003877	pbrm1	6.91645	5.78182	7.58595	9.11605	8.26868	7.7626	8.26282	7.80462	7.67677	8.46615	8.2679	8.62728	9.89529	8.23889	8.30991	9.30032	7.36973	8.11524
ENSDARG00000003899	zdhhc23b	6.02151	6.09388	6.24228	6.14976	6.74671	6.11398	6.0094	6.56699	5.8375	6.36322	6.47033	6.21028	5.85489	6.17295	6.63352	6.26045	5.84432	6.25856
ENSDARG00000003900	gpr61l	3.01187	3.1992	3.15754	2.98195	2.73581	2.73489	2.73947	2.73449	2.7336	3.45815	3.1658	2.73779	3.02377	3.02715	3.0991	2.73793	2.92661	2.7761
ENSDARG00000003902	ctsl.1	2.95103	2.3984	2.13559	5.6092	8.1151	6.59322	6.33394	9.49565	9.68248	6.35429	10.3039	9.11449	5.96113	10.8307	10.4631	6.76881	11.2307	11.706
ENSDARG00000003903	hapln2	0.229094	0.22878	0.228682	0.22891	0.228774	0.228678	0.355065	0.228637	0.228545	0.310861	0.228905	0.228978	0.289705	0.228561	0.228721	0.228993	0.228598	0.461726
ENSDARG00000003904	sycp1	2.32722	2.14317	2.14261	2.6399	2.14313	2.22847	2.59574	2.14236	2.14184	2.33057	2.14387	2.14429	2.19854	2.14193	2.14283	2.49575	2.31056	2.49023
ENSDARG00000003909	ftr01	0.605431	0.6048	0.604601	0.605062	0.604787	0.604593	0.605553	0.60451	0.604324	1.07653	0.605053	0.6052	0.604498	0.800208	0.604681	0.60523	0.604431	0.752654
ENSDARG00000003910	med13b	11.1293	10.5489	10.4072	10.9511	10.0292	10.3652	10.442	10.0689	10.0619	10.4599	10.2896	9.90917	10.9988	10.4553	9.61384	11.0162	10.251	10.0607
ENSDARG00000003920	setb	12.7783	12.8342	12.9823	12.0672	11.3998	11.4211	11.7402	11.8702	12.2327	11.1598	11.4373	11.62	11.8036	11.2805	11.4949	12.1981	11.8653	11.7826
ENSDARG00000003925	cx28.6	0.504291	0.503769	0.503605	0.670978	0.503758	0.503598	0.504392	0.50353	0.503376	0.504316	0.856055	0.5041	0.7	0.503403	0.503671	0.504125	0.503464	0.503534
ENSDARG00000003927	cldn12	9.80906	9.6041	10.4691	9.13235	8.82777	9.19807	9.3882	8.65653	9.26632	9.08593	9.54903	9.08984	9.42729	9.63598	9.59807	8.65809	9.43782	9.49281
ENSDARG00000003931	cndp2	7.38612	9.13378	8.58827	7.71287	12.3914	12.3127	8.46411	11.4094	10.1985	7.88883	11.5825	11.8745	7.8457	11.5033	11.8163	8.31412	11.7081	11.9715
ENSDARG00000003934	nxnl2	5.36155	5.88534	5.51748	5.54003	5.98861	4.94371	5.50008	5.47706	6.30157	6.30437	5.19472	5.20366	5.14758	4.91721	5.90431	5.72917	5.69309	5.5816
ENSDARG00000003938	rpa1	11.8314	11.9952	12.6431	10.3137	9.18632	9.42781	10.6355	10.4087	10.7806	9.35522	10.113	10.3562	9.96353	9.55037	9.70908	10.3074	9.85742	10.1895
ENSDARG00000003940	mtfr1l	9.7191	9.62749	9.0599	9.30476	8.78597	8.67087	9.11425	8.71185	9.44092	8.78231	8.2537	8.69529	9.26785	8.55941	8.85445	9.15522	9.01243	8.27857
ENSDARG00000003941	rrs1	8.10947	8.43511	8.02311	7.49219	6.87875	7.32572	8.4007	8.63397	6.57838	6.67441	7.1819	7.5169	7.14437	7.33428	7.30673	7.8692	7.94631	8.13164
ENSDARG00000003944	nmur1b	0.871706	0.8708	0.870514	0.871176	1.52444	0.870502	0.871881	0.870382	0.870114	0.871749	0.871163	0.871374	0.870364	1.03107	0.870628	0.871418	1.12747	0.87039
ENSDARG00000003952	pfn2	12.0909	11.3084	11.7868	11.7883	14.3038	14.4868	11.9091	14.5044	13.8132	11.8162	14.7529	15.337	11.8435	14.1341	14.7423	12.2708	14.4968	15.0625
ENSDARG00000003961	parp3	5.89297	6.84388	7.7858	6.65051	7.47736	8.09619	7.25497	7.40639	7.78997	7.27122	8.19851	8.11299	6.79516	6.85176	7.92069	6.85757	7.78269	7.95345
ENSDARG00000003963	traf4a	9.3143	8.74966	9.41366	9.92585	8.46556	8.48806	9.75649	7.39313	9.57574	8.94656	8.90079	9.23623	9.94085	8.7197	8.90707	10.1276	8.31037	8.02483
ENSDARG00000003965	tlx1	5.87425	8.00516	7.98849	4.98055	5.10545	6.96958	5.48986	6.50045	3.1707	5.79611	5.72189	3.39541	4.63076	3.90555	3.27349	4.49881	5.07893	5.24734
ENSDARG00000003968	larp6b	0.105154	0.104757	0.104632	0.104921	0.104748	0.104627	0.105231	0.104574	0.104457	0.105173	0.454929	0.105009	0.256294	0.104478	0.104682	0.146811	0.104524	0.104578
ENSDARG00000003970	trim35-13	3.28747	2.66864	3.31674	2.67111	2.93113	3.06407	2.67569	2.66587	4.23801	3.2962	2.67102	2.67241	2.93832	2.6644	2.6675	2.67269	2.89113	3.15009
ENSDARG00000003971	isl2a	6.64438	8.66491	8.79562	7.83332	7.75128	7.97508	7.47486	6.84106	6.23826	8.09119	6.78157	3.73118	7.96012	5.82697	6.03306	8.16305	6.57939	6.08225
ENSDARG00000003973	chordc1a	6.05013	6.68478	7.56417	6.34167	7.54421	7.7348	6.79542	7.79009	7.37344	6.898	7.58299	6.72485	7.4656	7.87929	7.43371	7.00659	7.84937	7.36179
ENSDARG00000003974	spoplb	8.60859	8.69251	9.15486	9.14628	8.76999	9.25154	9.16663	8.97323	8.60959	9.04153	8.76599	9.28841	9.06337	8.81577	9.23506	8.90978	8.49064	8.61701
ENSDARG00000003977	zgc:153896	3.689	3.73637	3.97029	3.47526	4.17345	3.58948	3.78357	3.47193	3.47081	4.2866	4.02135	3.47609	3.78941	3.96243	4.2432	3.5912	3.84602	3.54224
ENSDARG00000003984	si:dkey-175g6.5	9.77695	9.97085	9.84402	9.23295	9.07931	9.41851	9.02694	9.26765	9.1304	8.25183	8.82057	9.10849	8.95639	9.38432	9.12476	9.03002	9.08128	9.05325
ENSDARG00000003989	crhr1	4.96772	4.50011	5.58261	7.21031	5.69302	5.77793	7.14572	6.82579	6.60773	7.10699	5.86835	6.42619	8.492	6.94069	5.84059	8.18122	8.25611	7.37742
ENSDARG00000003991	fhl2b	2.48653	2.48135	2.4797	2.48351	3.10216	2.47963	2.63939	2.47894	3.95463	2.48677	2.48344	2.48464	2.86912	2.78797	2.48036	2.48489	3.51034	2.99904
ENSDARG00000003994	syt9a	3.10224	3.05505	3.03878	5.19066	3.15782	3.71559	3.28012	4.46903	3.01468	5.38567	3.07471	4.36226	5.95514	4.01096	3.95961	5.88656	3.77135	3.40316
ENSDARG00000003998	phyhipla	4.39648	4.03169	3.55336	5.45206	3.56665	4.0935	3.98303	4.69837	5.49599	3.61157	4.58483	3.59473	6.66911	4.89561	5.47192	6.35074	4.12697	5.13043
ENSDARG00000004015	adcyap1a	2.97242	3.77219	2.96182	3.31299	2.96422	3.58804	2.97395	2.96063	2.95819	4.23051	3.71463	2.9695	4.01919	2.95863	2.96285	4.45742	2.9596	3.27633
ENSDARG00000004017	spag1a	7.22429	7.33615	7.71737	7.71444	7.99257	7.7889	7.34094	7.54366	7.85923	7.00526	8.63467	7.91039	7.39078	7.79788	8.60708	6.82712	8.49487	8.74359
ENSDARG00000004018	si:ch211-236h17.3	6.88996	7.01183	7.01044	6.33324	7.83726	6.992	6.92082	7.0898	7.03531	6.34542	7.11474	6.00659	6.75277	8.0565	7.59936	7.32386	7.80568	7.58284
ENSDARG00000004023	isl1	8.21228	6.57174	5.57512	9.64698	7.81055	8.40215	9.55847	8.15977	7.94121	9.7467	8.45379	8.50117	9.9261	7.95876	7.48476	9.21989	6.7868	7.46225
ENSDARG00000004034	arhgdig	8.34619	8.56377	9.67941	8.9978	8.48085	7.95361	9.18329	8.86528	9.18964	9.34052	10.2895	8.83399	9.20686	9.70039	9.41874	9.31609	10.1077	10.631
ENSDARG00000004037	cog2	7.77776	7.71882	6.63747	7.88836	8.10175	7.70274	7.25614	7.67992	7.95812	7.72159	6.2988	7.01998	7.6065	7.80128	8.08439	7.95522	7.57589	7.19894
ENSDARG00000004046	phf6	8.73045	8.13407	8.81545	8.32637	7.44125	7.94595	8.13289	7.74235	8.4956	8.3307	8.70635	8.51268	8.21393	8.04106	7.3039	8.70929	7.82952	8.07763
ENSDARG00000004049	marcksa	8.86441	7.56218	8.76923	9.49668	8.50752	8.36432	8.4449	6.39054	8.16133	8.1959	6.16231	8.01016	9.29403	8.37256	8.57113	8.57214	7.35823	7.18032
ENSDARG00000004051		2.75073	7.03836	10.0758	3.87477	2.61927	2.57115	4.15343	4.97121	2.49437	2.75607	4.69992	2.70768	4.28334	5.22186	3.93631	4.1305	3.84261	2.9435
ENSDARG00000004055	uhrf1bp1l	8.81476	9.44664	9.65052	9.12414	8.9302	9.11123	8.99836	8.17527	8.6462	9.56962	9.49278	9.10362	9.73251	9.87486	9.14843	9.28065	9.90694	9.4435
ENSDARG00000004059	galk2	5.19292	5.80821	4.1353	5.41448	6.84218	6.76786	5.57256	6.53503	6.91479	5.48857	6.16797	6.53916	5.75552	6.98604	7.20388	5.1016	6.33284	7.00747
ENSDARG00000004060	bhlhe40	8.93416	7.82762	8.24797	8.01296	11.2049	10.4767	9.06873	12.0744	11.1848	8.59724	11.4724	11.6568	9.65794	12.2654	12.4223	9.47762	11.1672	10.9875
ENSDARG00000004074	bach2b	9.85839	7.80649	7.92604	11.2583	9.12568	9.49702	9.92459	8.94428	9.36943	10.8401	9.08574	8.74644	10.9626	8.868	8.93143	10.0618	8.94366	8.66264
ENSDARG00000004078	acsl4a	8.87049	9.18664	8.51112	9.6362	8.67809	8.41646	8.80419	7.81786	8.49418	9.28753	8.73172	8.60903	9.45542	9.09792	9.55245	8.83752	8.6033	8.60603
ENSDARG00000004082	cx39.9	3.14511	2.63291	2.63231	2.63371	2.63288	3.02261	2.63521	2.63203	2.63147	2.63493	3.18214	2.63413	3.10444	2.63157	2.63255	2.63422	3.20971	2.98615
ENSDARG00000004094	acsbg2	10.3354	10.9777	11.0578	10.7177	9.83176	9.64758	9.76029	9.50343	9.85921	10.7784	10.7839	9.86394	11.1059	9.55454	9.5645	11.0348	9.6639	9.9227
ENSDARG00000004105	tie1	9.49566	12.0718	11.254	8.59681	8.57902	8.26997	7.46608	8.88253	9.20667	9.36445	8.2724	6.89108	7.75412	8.60944	8.29045	7.90123	7.7283	8.53402
ENSDARG00000004111	esr1	5.15107	5.98611	6.09513	4.02897	4.81245	3.86792	4.68972	4.45318	5.11811	5.49443	5.00017	3.89192	4.99973	4.16119	4.73681	3.89308	4.7518	4.84232
ENSDARG00000004114	tti1	8.11362	7.86852	8.11929	7.43841	5.71185	6.57047	7.10926	6.55325	7.05759	6.41976	6.55422	7.24912	7.26194	6.92192	7.54894	7.29322	7.18909	7.03674
ENSDARG00000004115	mgat4b	7.24217	6.86225	6.98631	7.05837	8.27052	8.33436	7.61861	7.89019	7.01792	8.41206	7.69553	9.34344	8.00507	8.19009	8.9248	8.19328	7.62665	7.39808
ENSDARG00000004130	mvk	4.90341	4.78891	5.79929	5.11197	5.18015	5.29929	5.11188	5.97543	4.05985	5.43994	4.99616	4.78198	5.58192	4.37179	4.07299	4.09251	5.07903	5.30756
ENSDARG00000004131	rttn	9.21717	9.34718	9.59374	8.26406	7.34756	6.28281	8.18353	6.59164	8.25692	8.28441	7.09131	6.98457	7.60154	7.88869	7.2239	7.97937	7.55598	6.94506
ENSDARG00000004132	usp19	10.5638	10.6032	10.7684	11.2831	10.734	11.0285	10.6222	10.1827	9.76354	10.1121	10.303	10.1941	11.1105	10.7234	10.4662	10.8232	10.8009	10.7714
ENSDARG00000004141	zgc:92630	5.73264	5.43551	5.79068	5.39185	5.67961	4.84454	6.26706	4.50954	6.11513	5.6826	5.73512	5.34136	5.44865	6.05616	5.61145	5.7944	5.31931	5.29539
ENSDARG00000004150	grm2a	3.60977	3.39606	3.3764	5.98969	5.26415	4.01223	5.20037	4.74386	3.34723	5.92717	4.51464	3.433	6.45588	3.91736	4.50994	6.86645	3.85138	4.42375
ENSDARG00000004151	rab23	7.81097	7.98015	8.87981	7.31693	7.39681	7.96111	7.39645	7.66001	3.39357	7.52713	7.08271	7.93124	7.3682	7.40899	7.93789	7.70201	7.35087	7.68086
ENSDARG00000004154	orai1b	7.05205	6.77519	5.8886	5.68427	6.95356	6.41282	5.76598	6.52133	7.12045	5.394	6.44329	5.89838	6.3214	6.48156	6.67972	5.49907	6.39164	6.74889
ENSDARG00000004158	tmem63c	5.50931	4.12793	3.50992	6.87461	4.68826	6.02051	6.02527	3.49238	3.45458	6.81186	4.96234	4.48222	7.49947	5.1932	5.85445	7.34368	5.03568	4.85301
ENSDARG00000004160	reep3b	8.60834	8.47203	8.78572	8.15974	8.49672	8.18776	8.19552	9.15	8.20373	8.05926	8.48992	8.66639	7.99544	7.80313	8.4625	8.53246	7.94212	8.30748
ENSDARG00000004161	ik	9.66918	9.34516	10.072	9.77855	9.80597	10.1016	9.0714	10.2841	10.4443	9.5571	9.6498	9.97594	10.086	10.0165	10.4009	10.0462	10.2095	10.2929
ENSDARG00000004167	zgc:110366	6.33046	5.97129	5.38766	6.53538	7.30795	7.45462	6.1416	7.6521	3.98101	6.11573	7.1207	6.80511	5.9103	6.52905	7.48876	6.113	5.9909	7.02284
ENSDARG00000004169	stmn1a	10.8883	9.53513	8.8429	10.0904	9.39703	9.02612	11.1202	10.2669	10.5338	10.6077	9.30057	10.0156	9.65103	8.41166	9.14506	9.72799	9.06057	8.62585
ENSDARG00000004171	rabac1	6.89207	8.14071	7.87416	7.58342	8.6576	8.38592	7.87296	8.37574	8.71509	7.43925	8.41293	9.03962	7.49341	8.23701	9.13718	6.37676	8.41966	7.89009
ENSDARG00000004173	copa	11.2621	11.5985	11.0847	11.278	11.2928	11.5125	11.4442	10.7222	10.7757	11.3377	11.4556	11.1756	11.2626	11.3227	10.9865	11.4652	11.1404	11.2156
ENSDARG00000004174	cnot1	13.065	12.7784	12.4164	12.6282	11.7396	11.9745	12.3728	11.497	11.6526	12.2739	11.9287	11.6591	12.5733	12.1534	11.5907	12.4416	11.9797	12.065
ENSDARG00000004176	ulk4	6.941	6.65838	6.85496	6.74662	6.00066	5.35114	6.30623	4.656	7.04528	6.79857	6.03784	4.8627	6.45576	5.35829	5.28502	5.64779	5.70729	5.6085
ENSDARG00000004177	fam169ab	5.95845	4.09347	6.03659	5.8181	9.02561	9.10306	8.3041	9.1125	8.42742	7.95336	10.1934	10.6891	8.16574	9.48021	9.57145	9.3182	9.37839	9.56155
ENSDARG00000004184	nf1b	10.461	10.095	9.43398	10.2505	10.6091	10.74	10.4497	10.3452	10.1631	9.65059	9.97343	10.4126	10.5766	10.6531	10.512	10.3096	10.2174	10.6374
ENSDARG00000004187	zgc:122979	4.00354	3.49491	3.46829	5.46916	4.1947	4.8991	4.24969	4.53759	5.7306	5.58645	4.94532	4.12427	7.35747	5.01996	4.86225	7.33705	4.61955	5.35429
ENSDARG00000004189	cbx1a	10.157	9.72585	9.74197	9.46817	8.85218	9.10982	9.67911	9.112	9.28433	9.6135	8.91801	9.4887	9.56672	9.01075	9.25606	9.29337	9.18363	9.45877
ENSDARG00000004196	tnfsf10l	9.12349	8.11372	8.07344	8.52119	8.5359	8.42585	9.82187	8.13224	8.16941	9.04503	8.51583	8.36913	8.84216	8.88247	8.2763	8.85004	8.64001	8.26384
ENSDARG00000004199	spam1	1.2657	1.11059	1.1104	1.28283	1.11058	1.11039	1.1113	1.11032	1.11014	1.11121	1.11083	1.11096	1.3642	1.11017	1.37384	1.11099	1.20381	1.11032
ENSDARG00000004204	efhc2	3.23458	3.02691	2.83382	3.91091	2.93855	2.80619	2.81247	2.80564	2.8044	3.03145	3.08185	2.81017	3.18982	3.14494	2.80676	3.60392	3.05314	3.13803
ENSDARG00000004211	ccdc106a	8.76675	8.22288	7.05313	8.79436	8.43652	8.41241	8.63264	8.08978	9.04613	9.2762	8.68586	8.07974	9.11288	8.2315	8.5075	8.80204	8.2909	8.56855
ENSDARG00000004218	rnd1b	8.2334	6.67332	6.42007	7.84885	7.96729	7.10606	6.69394	7.23397	6.57873	7.19419	7.2145	6.86247	8.17052	7.36283	7.63377	7.43449	7.09439	6.62633
ENSDARG00000004219	slc6a3	3.51378	3.15838	3.15503	3.28457	3.15816	3.15489	3.53738	3.15348	3.45606	4.05396	3.63966	4.62951	4.44958	3.15086	3.70728	4.8582	3.18139	3.73844
ENSDARG00000004227	pde3a	9.01052	6.68843	8.46043	9.17241	9.11853	9.54736	9.73341	8.61804	9.42951	10.1524	8.80776	7.74074	9.81031	8.9068	8.28986	10.1281	9.68382	8.78468
ENSDARG00000004232	dlb	10.2609	4.92179	4.89423	9.83275	8.4955	7.96868	8.82148	6.40964	8.20199	8.73863	6.67283	7.32179	8.97461	6.8557	6.11366	8.03712	6.44648	6.38728
ENSDARG00000004243	asic4b	3.46185	2.50878	2.50695	3.15165	2.50866	2.50688	2.5156	2.5061	2.50437	2.51478	2.51109	3.11197	3.94708	2.50468	2.50768	3.51778	2.6548	2.50615
ENSDARG00000004246	slit2	9.96891	8.29897	7.77553	10.2505	9.3955	9.27427	10.8422	9.14285	9.33858	10.3116	8.9758	8.34577	10.5531	8.70052	8.14284	9.73417	9.2144	8.49643
ENSDARG00000004251	dhfr	7.82399	7.98732	7.42205	6.52115	6.3165	6.7437	6.88848	6.86508	5.09457	6.20816	6.68652	7.50543	6.11004	6.78658	6.83709	6.33127	5.98978	6.60267
ENSDARG00000004256	wnt11	4.45637	4.37402	4.65359	4.66178	4.68426	4.05572	4.08536	3.68334	3.68072	4.5186	4.4247	3.69292	3.90325	4.31818	3.68572	4.33332	4.19296	3.88955
ENSDARG00000004260	cul5b	3.88021	3.28137	3.27569	5.38165	3.281	3.7143	4.63559	3.27305	3.26759	4.30675	3.36539	4.51086	5.18967	3.33	3.27797	4.79971	3.69258	3.67237
ENSDARG00000004261	tmed9	10.1244	10.4905	9.50098	9.99427	10.6748	10.7446	9.90873	10.8263	10.8826	9.62612	10.4012	10.242	9.70521	10.087	10.6853	9.5179	10.4461	10.2565
ENSDARG00000004262	cyp46a1.2	4.89833	7.52625	6.3148	5.68366	5.94872	6.05868	5.96594	6.00743	6.10492	6.3779	7.17573	5.71689	5.67123	6.69038	6.50816	5.91403	6.86892	6.57095
ENSDARG00000004270	atl3	7.60787	8.2711	7.9621	7.86772	11.5854	11.4334	9.2618	11.4384	10.9429	8.7904	11.1831	12.0447	8.62767	11.1611	11.6743	8.41579	11.141	11.3993
ENSDARG00000004274	zgc:112496	5.92159	6.30393	6.1753	5.60479	5.68866	6.0048	6.24235	4.65914	6.39623	6.14312	5.48606	6.43118	5.23339	4.69183	6.22529	4.68919	5.8617	6.32777
ENSDARG00000004280	seh1l	9.5355	9.86791	9.25328	9.28979	8.77852	9.13144	8.95109	8.90338	9.43253	8.8854	9.34652	9.38821	8.73071	8.66669	9.10772	8.56097	9.08351	8.74532
ENSDARG00000004282	zgc:77375	6.91023	7.34379	8.037	8.35987	8.93093	8.62896	7.72179	9.3655	8.40355	7.51838	8.96078	8.61994	8.44764	9.45851	9.16639	9.53505	10.0627	9.67671
ENSDARG00000004291	hecw1b	6.78677	2.95629	4.49676	9.60576	6.82208	7.38071	8.27711	7.71533	6.58737	9.4367	8.40562	7.5728	9.8531	7.2644	6.7197	9.78382	6.21146	6.90356
ENSDARG00000004296	ambp	3.58537	2.84362	2.74763	2.95022	4.42773	2.74339	6.16306	8.25357	6.63518	3.08358	6.47872	5.16973	4.08249	8.46812	7.68398	5.81162	6.66458	7.16009
ENSDARG00000004297	irf2bpl	10.3837	9.79699	9.22969	11.1696	10.4677	10.1178	10.6811	10.8901	10.7576	11.294	10.0385	10.0457	12.1692	10.4067	10.5954	12.006	10.8622	10.0771
ENSDARG00000004301	rhogb	7.04549	8.16572	9.39936	6.21928	9.89392	9.76691	8.12636	9.43875	9.27883	6.80765	9.98054	10.0622	6.95434	9.53144	9.9806	7.1292	9.84486	10.0843
ENSDARG00000004302	slc45a1	5.80913	3.33069	3.28973	7.26819	5.33299	6.06418	5.63836	5.29453	4.60681	6.22693	3.37841	5.03202	7.48997	3.3955	3.30651	7.31362	4.33627	4.56144
ENSDARG00000004305	vangl1	5.58396	6.50018	7.0076	7.48586	5.84601	5.90758	6.31479	6.82259	6.90703	7.53282	5.32091	5.97558	7.90664	5.28016	5.47085	7.28774	5.94773	5.6156
ENSDARG00000004306	klhl18	6.89912	6.63931	6.59417	7.04935	7.60251	7.74587	6.44642	7.17096	5.82324	7.61097	7.88652	7.53964	7.10955	7.08165	7.30042	7.47665	7.29578	8.08845
ENSDARG00000004307	lypd6	6.44447	7.27043	7.21318	7.36951	8.0035	7.51918	7.08206	7.37692	5.90853	7.21546	7.80678	7.43374	7.68243	7.63338	7.49528	6.60435	7.43972	7.35331
ENSDARG00000004308	fam8a1b	7.80978	8.15607	8.00414	7.0403	6.71231	7.09047	7.03767	8.31274	8.03627	7.73716	8.272	6.99413	7.69662	7.08957	7.04014	8.0881	7.59456	7.6644
ENSDARG00000004311	ldlrap1a	6.10742	7.53617	6.22936	6.82085	8.65456	8.25083	6.84849	7.14191	7.71142	7.21467	7.64303	8.70078	6.66061	7.02993	7.78283	6.06374	7.86547	6.68475
ENSDARG00000004318	cbwd	5.16148	5.48235	5.42535	5.59409	6.73583	6.60553	6.24868	6.63032	4.32367	5.84012	6.12805	6.41325	5.88316	6.1007	6.22073	5.97345	6.30196	6.22595
ENSDARG00000004322	ush1ga	3.29536	3.29051	3.28898	3.89943	3.73155	3.86149	3.94177	3.72189	3.28683	3.54358	3.29245	3.29358	3.96482	3.69824	3.59524	4.04445	3.74193	3.53605
ENSDARG00000004325	casp9	6.11181	6.22486	5.77172	5.77315	6.3512	6.49663	5.36372	5.59536	4.06067	7.31435	6.95747	7.48616	6.72963	6.35364	7.24505	6.03291	7.21121	6.75928
ENSDARG00000004328	si:ch1073-284b18.2	5.45682	4.8782	5.29729	4.38126	3.2121	3.89439	3.85886	3.06134	3.05408	3.09603	3.08159	3.08687	3.74888	3.05539	3.06786	4.62863	3.14552	3.06155
ENSDARG00000004336	exoc4	9.48087	9.85472	10.7205	9.68263	9.86836	9.33444	9.64412	9.71462	9.82148	9.78115	9.18259	9.60808	9.78865	9.85446	9.58779	9.22088	9.70274	9.76694
ENSDARG00000004343	nelfe	7.75509	7.51903	8.53693	8.00968	8.22396	7.95392	7.96923	8.0947	8.9624	7.55019	7.74118	7.99874	7.9196	7.82838	8.1379	8.59574	8.23986	7.9196
ENSDARG00000004358	gnb3a	4.62802	2.79779	2.55829	10.2817	7.90709	8.32735	9.20682	9.13229	10.1094	9.85606	9.22189	8.82327	10.1881	8.0842	8.1509	9.37337	7.57201	7.81368
ENSDARG00000004363	lhfpl6	7.38067	6.88175	7.52499	7.39566	7.1213	7.34631	8.09402	6.53268	7.468	7.27732	6.25766	6.15967	7.86762	5.92434	6.9361	8.75047	7.6092	6.7473
ENSDARG00000004372	fmnl3	9.97844	11.14	11.155	9.50058	8.57499	8.57813	10.3489	7.65714	9.34317	10.157	7.97431	8.21555	9.5701	8.12325	7.91665	9.70688	8.57697	8.28256
ENSDARG00000004377	ppp1r13ba	8.98764	10.2502	10.3004	7.3943	9.50355	9.36261	8.11324	8.81817	9.36818	7.28089	8.52594	7.87313	8.15638	8.6421	8.31733	8.39253	8.99134	8.47576
ENSDARG00000004378	yrk	8.5069	10.7926	10.2422	6.93149	6.56685	6.03659	6.14372	7.98252	8.23381	7.50954	8.31731	7.68466	6.89103	8.47205	8.34539	7.49452	8.14592	8.54657
ENSDARG00000004386	si:dkey-153k10.9	8.12899	3.93172	6.09842	9.46591	6.33087	7.40092	8.47474	6.00864	8.08237	9.14787	7.62211	7.45177	9.84228	6.76151	7.03076	9.9598	5.98164	6.54688
ENSDARG00000004392	hdr	8.98271	11.6653	11.6317	8.51294	6.36048	5.62163	6.4316	1.7331	1.36633	7.35731	6.22879	6.1685	6.10659	5.65437	4.09023	6.30081	5.13522	4.23609
ENSDARG00000004396	b3gnt5b	4.03568	5.14814	5.63992	4.12506	4.18016	3.67519	4.66699	3.67319	5.02698	3.98325	3.68606	4.44122	4.22581	4.53817	3.79891	4.29062	4.33291	4.3794
ENSDARG00000004402	elovl6	6.85811	5.29957	6.73591	8.51248	7.38591	6.74087	7.48659	7.27838	7.12893	8.54954	7.51012	6.60562	8.84836	7.37883	7.99786	7.89382	7.04996	7.25442
ENSDARG00000004405	snx10a	2.12134	2.29922	2.11839	2.12003	2.34788	2.3784	2.12177	2.91437	2.1174	2.12144	2.12	2.12052	2.36176	2.78818	2.11867	2.29998	2.15588	2.11808
ENSDARG00000004406	spra	6.96385	6.90559	6.23526	6.66983	7.08282	6.62862	7.13355	5.98057	6.36918	5.65899	6.23173	6.02334	6.96612	6.97385	6.18258	7.06615	7.00817	7.43437
ENSDARG00000004415	tcf7l2	9.76764	7.7366	7.62632	11.2673	9.13644	9.64045	10.4782	8.40219	8.92793	10.8686	8.92755	8.67643	11.2847	9.09797	9.22061	10.8346	8.89657	8.54967
ENSDARG00000004427	dpy30	7.17096	6.55549	7.01333	6.98207	7.56278	6.52407	6.44177	6.87504	6.66567	6.08966	7.23383	7.86965	6.55015	6.20088	7.36565	7.45563	6.97556	7.27479
ENSDARG00000004433	btk	7.17227	9.83203	9.25631	5.34487	6.72124	3.87492	4.54165	8.32365	6.44832	5.44678	8.25231	6.65059	6.22345	7.87381	7.65634	6.50467	8.30315	7.76091
ENSDARG00000004436	fam92a1	7.70918	7.28422	6.18193	7.44073	8.32464	7.44872	6.79584	7.79924	6.66736	7.21578	6.78415	7.23843	7.41355	7.54717	8.10505	7.79442	7.13325	6.85814
ENSDARG00000004445	grm5a	3.33926	3.32868	3.32529	4.18476	3.32846	3.32515	3.74822	3.68283	3.32049	3.91386	3.67903	4.22589	5.10002	3.73938	4.1168	4.7669	3.65997	3.81925
ENSDARG00000004447	aplnr2	6.19441	7.03024	5.73618	6.96411	6.22596	6.05873	5.73543	6.65144	6.42144	6.63649	5.48214	5.38866	6.79116	5.97064	6.34698	6.42125	5.80247	6.35875
ENSDARG00000004451	tnfrsfa	8.3436	9.20888	8.91089	8.14356	10.5109	10.0335	8.75985	10.3442	10.2766	8.8922	9.95181	10.575	8.66036	10.1888	10.7065	9.11074	9.95651	10.2272
ENSDARG00000004452	tardbpl	11.1972	10.7829	11.0345	11.3302	10.8634	10.6524	10.6403	10.5058	10.1963	10.4348	10.1374	10.315	10.8889	10.1726	10.6958	10.8814	10.2773	10.2733
ENSDARG00000004455	p2rx5	4.01882	3.73549	3.65565	4.17746	4.10863	3.99214	4.1115	3.65501	4.15957	3.66166	3.6588	3.65983	4.10956	4.61482	4.19286	4.11602	4.24199	4.44451
ENSDARG00000004459	unc119.2	2.12077	1.70107	1.97511	1.61188	1.61128	1.61085	2.12051	1.61067	1.61026	1.61275	1.61186	1.61218	1.6311	1.61034	1.61105	1.61225	1.6105	1.8316
ENSDARG00000004460	desi2	7.90223	7.16846	6.96642	7.84325	7.20223	7.20292	6.93105	6.62001	7.41261	6.62957	6.51601	7.3806	7.91258	7.00341	6.72688	7.62824	7.53792	6.73364
ENSDARG00000004470	prkcsh	9.42628	9.34127	9.60085	9.85044	9.89882	9.83336	9.66214	10.3199	10.1643	8.95821	9.5424	9.73003	9.43007	9.56258	9.69746	9.76137	9.92445	9.7579
ENSDARG00000004472	atat1	6.79745	5.64067	6.28382	7.4396	5.3928	5.74331	6.44437	6.1299	6.95318	6.87585	5.20716	5.14519	7.35509	6.08595	6.41013	7.06886	5.50196	5.93758
ENSDARG00000004473	tbx21	4.213	3.49042	3.48717	4.51659	3.4902	4.43066	4.14637	3.48567	5.05407	4.0435	3.49451	4.19092	4.62592	4.14884	3.48847	4.04894	3.6891	3.7636
ENSDARG00000004492	pcyt1ab	7.58011	8.55808	7.67056	8.2671	8.48246	7.78346	7.98546	7.86366	8.06054	7.67561	7.80277	7.95787	8.29994	7.69912	7.77306	7.71329	7.98553	7.49536
ENSDARG00000004497	tspan33a	6.05789	4.34749	5.93145	5.91237	6.01874	5.18204	6.62701	6.40108	6.99909	5.67114	6.27041	6.73218	5.54801	6.40779	6.4778	6.35659	6.34719	6.7964
ENSDARG00000004498	xkr8.1	1.47486	1.47357	1.47316	1.4741	1.47354	1.47314	2.07499	1.47297	1.47259	1.6734	1.47409	1.47439	1.4937	1.47266	1.8748	1.47445	1.47281	1.82955
ENSDARG00000004502	rcor3	8.66515	7.48992	7.90365	9.20465	7.50029	8.34738	7.66814	6.18702	7.68503	8.54561	7.84419	8.16854	9.2245	7.97728	7.72007	8.58392	7.39912	7.53517
ENSDARG00000004517	ppat	8.82568	8.96203	7.64424	5.80629	11.549	11.5789	7.44315	10.3468	9.58345	6.92827	9.58148	11.1448	6.44803	10.5599	10.66	6.02453	10.7225	10.7717
ENSDARG00000004525	zgc:63882	7.42161	7.64421	8.16383	7.04639	7.64793	7.5152	6.85378	7.64655	7.49753	6.9541	6.78919	7.26413	6.98826	7.35887	8.03422	7.05929	7.39988	7.39498
ENSDARG00000004527	pin4	6.65592	6.72052	5.796	6.25235	6.64638	6.13775	6.78815	6.47381	4.33006	5.52671	5.56593	6.51544	6.1231	6.04761	5.69917	5.72286	6.45208	6.2356
ENSDARG00000004529	zgc:173742	2.71637	2.99519	2.71185	3.1454	2.71287	3.19834	3.1077	2.71135	3.57269	2.71653	2.71431	2.71511	2.81536	2.77487	2.71229	3.36958	3.13759	2.96352
ENSDARG00000004537	kmt2a	12.2833	11.4112	11.4716	12.5518	10.8953	11.3145	12.0278	10.1749	10.5245	12.291	11.0641	10.8852	12.4721	11.223	10.7677	11.6291	11.1856	11.067
ENSDARG00000004539	ptgs2a	7.3254	5.9061	6.06334	7.16277	7.36927	5.90651	7.90812	6.22081	8.79961	7.44404	8.59111	6.27315	7.48821	6.93626	6.70945	7.73437	7.15722	6.67269
ENSDARG00000004561	prkcg	2.48701	2.47935	2.47687	2.48256	2.47919	2.91883	2.48845	2.9869	3.64919	2.653	2.48245	2.48424	3.6729	2.47378	2.47787	3.75073	2.66653	2.47579
ENSDARG00000004574	gtf3c2	7.50998	8.00444	7.45479	7.64776	6.81031	5.90781	7.14179	5.88498	6.69606	6.67146	5.38795	7.17296	7.51698	6.97863	7.67945	7.34762	6.94945	7.16939
ENSDARG00000004576	plk4	8.90982	8.56897	8.45344	8.15011	5.9561	6.95205	7.66851	6.47626	5.83185	7.40589	7.07437	6.89487	7.4338	6.39578	7.31856	7.28892	6.86881	7.00656
ENSDARG00000004577	zgc:194665	4.81898	4.04817	3.67775	4.69887	4.15254	4.32669	4.53156	3.67588	3.67204	4.6421	3.68685	4.34444	5.39291	4.34925	4.10578	4.85951	3.70107	4.30092
ENSDARG00000004580	nmnat2	4.7568	3.38578	3.34007	7.21736	4.60371	5.1382	5.70027	5.61189	4.224	6.92145	3.43871	5.7402	7.63172	5.2934	6.1668	7.62056	3.9894	4.54922
ENSDARG00000004581	sel1l	8.68533	9.04092	7.86158	8.67379	9.05407	8.95302	8.51442	9.14087	8.42827	8.58588	8.89729	8.67242	8.75424	9.36631	8.7029	8.64567	8.94072	9.18475
ENSDARG00000004586	ntrk1	4.6848	3.79374	4.93389	4.94312	4.59449	4.33651	4.51704	3.78598	3.78091	5.32553	4.27906	4.36522	5.18903	4.35748	4.62924	5.65659	4.08011	3.82045
ENSDARG00000004587	kat5a	8.06965	7.94219	8.41906	8.52181	7.54194	7.43731	7.85149	8.26053	8.06807	8.49023	7.98627	7.64219	7.89799	7.43671	8.14154	7.81892	7.86534	7.37116
ENSDARG00000004588	sox4a	10.2512	9.05953	9.86325	12.5145	10.8949	11.3969	11.5504	11.1081	10.924	12.1531	11.0161	10.9634	12.5422	11.0541	11.081	11.9201	10.2994	9.8459
ENSDARG00000004592	gpr22a	5.29778	5.19221	5.42179	5.73675	5.40339	4.94323	5.66017	4.31049	6.39613	5.96291	5.11842	4.89558	6.27268	5.15346	4.38921	5.9561	5.4121	4.74324
ENSDARG00000004594	znf800a	9.05013	8.88524	8.51846	8.73203	8.23963	8.28108	8.51231	8.2006	8.2667	8.20789	7.8607	8.85652	8.81454	8.10428	7.66735	8.99123	8.12588	7.91435
ENSDARG00000004597	lrrc4ba	5.8548	4.51021	3.60575	7.32588	6.64313	6.16354	6.18697	4.96594	6.07181	7.04304	5.76852	4.82963	8.55476	6.22056	5.64661	7.2672	4.90528	5.61259
ENSDARG00000004616	mtmr2	8.7923	8.46691	9.02833	7.80508	9.90127	9.56936	7.46675	9.99808	8.30957	7.65636	9.16685	9.62956	7.4376	8.95546	9.54275	7.06023	9.42259	9.00169
ENSDARG00000004618	stx2a	6.13672	4.95586	5.34789	5.51169	6.28327	5.97076	6.50644	6.71571	6.72305	6.11121	7.1428	6.24551	6.10115	6.22458	6.55881	5.60626	6.40727	6.13416
ENSDARG00000004621	gpm6ab	8.77844	7.96347	6.14601	11.7147	11.6004	11.5476	10.5271	11.7	11.1844	11.2804	11.2042	12.1362	11.9822	11.4366	11.7633	11.1936	11.3282	11.6163
ENSDARG00000004627	panx3	2.9647	2.952	2.94788	4.50859	2.95173	2.94772	4.63984	2.94597	2.94203	4.74894	3.80009	2.96011	3.97005	2.94274	2.94953	3.99546	3.41138	2.94608
ENSDARG00000004632	egln1b	5.94704	7.5841	7.57877	6.40086	6.69585	6.19956	6.2282	7.49334	6.5609	6.91146	6.54008	6.43163	5.71813	5.11527	6.5053	6.12485	5.96014	5.96587
ENSDARG00000004633	epn3b	3.93832	3.16713	3.16516	3.93147	3.76212	3.62633	3.42049	3.16425	3.16239	3.17361	3.16962	3.63152	4.42735	3.54984	3.16595	3.93825	3.36204	3.50191
ENSDARG00000004634	osbp	9.61792	9.87575	10.2078	9.88694	10.1578	10.2579	10.3159	10.3043	10.4619	9.70024	10.6649	10.4094	10.062	10.8837	10.4068	9.97252	10.5781	11.0148
ENSDARG00000004635	epha7	11.0715	10.6537	10.8772	10.1315	9.98979	10.4339	10.2084	9.55266	9.5083	10.0773	8.71459	8.9151	10.6069	9.20328	8.89193	10.326	9.299	7.80268
ENSDARG00000004636	ccdc9	8.3779	7.78675	8.97733	8.25351	7.88783	8.20057	8.07089	8.31344	7.28914	8.05906	8.09383	7.09742	8.39254	8.47917	8.63189	8.48959	8.25454	8.46664
ENSDARG00000004643	cdhr1a	3.9918	3.51811	3.5047	4.72498	3.51725	3.50415	6.31302	3.49838	4.97676	6.31588	3.81329	4.56842	5.61706	4.85724	5.14007	5.72856	3.96216	4.36654
ENSDARG00000004647	spice1	6.76847	7.59695	7.58562	6.41115	6.00247	5.25636	5.93116	5.2863	5.35436	7.07212	5.8395	6.22997	6.05754	5.79801	4.05585	5.46347	6.62604	6.32526
ENSDARG00000004648	kctd16a	3.40021	3.73786	3.37465	4.42863	4.17046	3.37439	3.40382	3.37172	5.24736	4.27074	4.2039	3.96381	5.56977	3.85738	3.37718	5.34779	3.40626	4.41878
ENSDARG00000004658	zgc:101810	7.84404	4.92516	3.22892	6.73927	6.29376	4.62512	8.34528	4.97572	7.16659	7.41647	7.14677	3.426	6.14333	4.00791	3.25929	6.80857	5.3531	5.18424
ENSDARG00000004672	ptk2ab	9.28066	8.84259	8.77967	9.71857	8.49651	8.45429	9.2246	7.53869	8.57406	9.44661	8.82159	8.65549	9.99218	8.4219	8.35089	9.67956	8.59193	8.25668
ENSDARG00000004680	dnajb6a	7.92646	7.9051	8.82185	8.55965	8.47538	8.98414	8.68425	8.4683	8.44813	7.97968	8.75763	8.8004	9.04404	8.57019	9.19359	8.81765	8.73959	9.29966
ENSDARG00000004687	acaa1	4.95503	6.10344	6.10154	5.97905	6.82075	5.93915	6.92661	6.48671	7.66609	6.77562	7.2717	7.12243	6.64334	8.23643	7.61282	5.81886	7.39526	7.14217
ENSDARG00000004692	nabp1a	9.82557	9.74247	9.482	10.1419	9.77847	9.52941	9.53531	8.30799	9.25816	9.62357	9.04042	9.31186	9.38587	8.49239	9.03563	10.1028	9.40416	9.91941
ENSDARG00000004695	six4a	6.48333	6.22455	6.47345	6.3901	5.61673	5.7574	7.1725	4.06462	4.08621	6.29451	6.17766	4.14562	6.65618	6.00519	5.89402	6.64602	5.86526	4.96905
ENSDARG00000004696	eefsec	7.04619	7.92303	7.74644	7.09708	8.03315	7.33026	7.15545	6.36538	7.79008	7.39454	6.0757	7.13271	7.02343	6.96159	7.456	6.28447	7.05335	7.23702
ENSDARG00000004697	rxrgb	7.04216	4.48504	6.9187	7.72665	7.66872	6.68354	7.31057	7.97334	8.1754	8.05696	7.87127	7.79115	7.08999	8.06101	7.83335	7.76948	6.75107	7.00235
ENSDARG00000004702	irf2bp2a	9.89712	9.89763	10.0274	10.2479	10.7939	10.5858	9.46988	11.0254	11.0675	10.2672	11.1351	11.0698	10.6763	11.1839	11.4893	11.1069	10.8225	11.1082
ENSDARG00000004706	syf2	8.07959	8.33895	8.80327	8.86863	8.76027	9.36566	8.05725	8.63606	8.51947	8.99094	9.47324	9.81971	8.45436	8.93235	9.4032	9.4877	8.90644	9.28119
ENSDARG00000004712	tbr1b	6.86021	3.51897	3.46411	7.46583	5.67892	5.25896	7.53755	3.43689	6.73771	7.06253	6.16678	3.61509	7.59617	5.05745	5.1803	7.20504	5.32958	5.79776
ENSDARG00000004713	mad2l1	9.24577	9.92216	8.09513	8.04558	7.61385	7.19916	7.80774	8.37448	8.65257	7.70725	7.23373	7.95627	7.48027	7.60471	8.05762	7.60205	6.87759	6.27358
ENSDARG00000004714	tcf12	11.0104	9.67323	9.61626	11.1074	10.5806	10.6822	12.1145	10.3125	10.3375	11.7245	10.6088	10.2977	11.3085	10.4575	9.92025	10.6416	10.2646	9.70027
ENSDARG00000004721	mpp5b	2.52756	2.56056	2.52279	2.52544	2.55995	2.52274	3.19629	2.52226	2.52118	3.35739	2.52539	2.79899	3.12462	2.8938	3.41086	2.63058	2.5218	2.52229
ENSDARG00000004724	tcea3	4.95534	5.4287	5.55095	4.66186	5.57261	5.10052	5.67867	4.19406	5.62694	6.41552	6.72223	6.4047	5.1531	6.38921	6.22424	5.06428	6.22921	6.20779
ENSDARG00000004726	trappc11	9.87094	10.5423	9.70641	9.40014	10.4237	10.4959	9.44713	10.2452	9.22546	9.50399	9.93907	10.6313	9.59755	10.0485	10.6221	9.14693	10.1629	9.97448
ENSDARG00000004727	cmss1	7.46531	7.58008	6.99678	6.47119	7.51103	7.06135	7.43417	8.68679	7.3051	6.94699	7.13566	7.62376	6.48338	6.9548	7.52434	6.36122	7.43723	7.22733
ENSDARG00000004735	hnrnpub	12.2342	11.5032	11.6007	12.3958	10.797	11.2491	11.4395	10.5203	10.683	11.1226	10.0622	10.5251	11.614	10.7029	10.2637	11.3152	10.7017	10.7909
ENSDARG00000004745	lmbr1l	7.29239	7.08158	7.21446	6.52516	6.30373	4.92041	6.91022	5.66042	3.95071	6.15852	5.70373	5.28483	6.26649	5.74773	4.71708	5.44403	5.23709	5.13079
ENSDARG00000004748	zgc:100868	5.38161	4.33076	2.70611	6.66525	6.1123	7.05162	8.6533	4.75465	8.60962	7.28584	10.5219	8.19459	6.12425	6.24561	7.36133	7.34461	7.05742	6.63341
ENSDARG00000004753	mylkb	5.42735	5.68055	6.06908	5.68304	6.75244	6.49826	9.61563	8.49977	8.39016	8.69308	7.64349	8.74414	8.64149	7.69148	7.38193	7.44779	8.47471	8.58338
ENSDARG00000004754	hspa4a	9.86443	10.7487	10.7351	9.90244	10.3142	10.4093	10.1965	9.98516	10.4882	9.37587	9.871	9.77136	10.3216	10.5822	9.95652	9.78442	10.0844	10.1592
ENSDARG00000004757	ybx1	11.9364	11.9769	12.448	12.0044	12.4654	12.288	11.851	11.8764	11.1756	11.8366	12.5108	12.7423	11.7551	12.3066	12.2795	13.1664	12.3833	13.0625
ENSDARG00000004763	hhla2a.2	5.19339	4.53538	6.05267	5.75094	4.56729	5.52886	6.0485	3.89209	3.87623	7.03659	6.13964	5.04482	4.96031	4.19883	4.34884	5.39995	5.88732	5.51122
ENSDARG00000004771	ankrd10b	6.78152	6.29379	6.95481	7.12898	5.56914	6.15111	6.50648	6.43851	7.18966	7.19241	5.71629	5.19556	6.85177	6.4405	6.21296	7.4009	6.55837	6.35057
ENSDARG00000004774	wdr36	9.78059	9.55512	9.4447	8.53035	8.28233	8.47735	9.07571	7.7638	8.6711	8.41219	8.4792	8.68923	8.60591	8.77874	8.64549	7.5947	8.8985	8.6252
ENSDARG00000004782	fgfr3	10.9128	9.36685	8.77394	10.0382	9.57478	10.0136	10.5039	9.21301	10.1745	11.2638	10.0373	9.13351	10.6628	8.91151	8.19481	10.4236	9.07655	8.22094
ENSDARG00000004785	cops2	10.157	10.4988	10.5822	9.88297	10.0412	10.1828	9.03138	10.511	10.6542	9.30359	10.148	10.6472	9.59445	9.99371	10.5309	10.2397	9.95688	10.5028
ENSDARG00000004789	lrp1ba	4.97473	4.9632	3.1546	7.73579	5.4068	6.17643	7.52499	5.06294	7.03158	7.94928	7.50939	5.83299	9.19271	6.81224	7.14578	8.91717	6.08894	6.13767
ENSDARG00000004794	ccdc146	3.94804	3.36595	3.36346	4.15436	3.54558	3.36336	3.78018	3.36231	3.35995	4.17206	3.36909	3.70486	3.70481	3.91734	3.70422	4.38769	4.23887	4.67576
ENSDARG00000004796	mgrn1b	8.96923	8.96442	9.57842	9.40072	9.12014	9.33525	9.16855	9.4005	9.29638	9.6497	9.45737	10.0533	9.80288	9.64281	9.39346	9.29347	9.53417	9.93092
ENSDARG00000004806	grwd1	8.58819	9.13205	8.46869	7.76625	7.98249	8.01068	8.47767	7.89164	7.86646	8.17376	8.12612	8.46512	8.19166	8.66925	8.29708	7.88344	8.46671	8.72171
ENSDARG00000004823	asz1	1.31	1.30829	2.13598	1.309	1.30825	1.30772	1.31033	2.07095	1.30698	1.43691	1.30898	1.30938	1.30746	1.30707	1.30796	1.30946	1.30728	1.30751
ENSDARG00000004830	flot2a	10.5511	11.0917	10.6884	10.276	11.4335	11.4901	11.0559	10.992	9.91568	11.3895	10.9058	11.556	10.7598	10.9324	11.3862	10.497	11.4906	11.427
ENSDARG00000004836	dnajc5ab	9.53268	9.35495	9.9566	10.4727	9.86639	10.1054	10.3982	9.99847	10.6728	10.3946	9.87897	10.0593	10.8267	9.71549	10.0289	10.2496	10.0679	10.1898
ENSDARG00000004840	rassf1	8.337	9.65891	8.56132	7.73387	8.62408	8.31627	8.27539	9.25348	8.33258	8.27063	8.12553	8.71008	8.11835	8.20494	8.57624	8.56795	8.54085	8.3097
ENSDARG00000004843	foxp1a	10.0894	9.54449	10.171	9.19503	7.94497	8.35159	9.27345	8.15096	8.76476	9.64284	9.42877	7.91592	8.5028	8.46322	8.14658	8.78169	8.71155	8.16253
ENSDARG00000004851	hinfp	6.12465	6.11035	7.12253	6.49882	6.27154	6.19521	5.52683	7.08007	5.79298	6.00072	6.53601	6.19864	6.33826	6.49895	6.31576	6.31574	5.81015	6.02301
ENSDARG00000004861	esrrga	8.55403	8.8028	8.62605	10.5416	9.13052	8.96377	9.02306	8.58615	8.86013	10.1758	9.27818	8.14307	11.1905	8.67552	8.55207	10.5544	8.39814	8.49758
ENSDARG00000004866	rfx5	8.56915	8.74483	9.13528	8.62622	9.28112	9.03542	8.42242	9.10755	8.91073	8.81651	9.38782	9.75642	8.24214	9.287	9.72086	7.79811	8.48843	9.003
ENSDARG00000004866	mindy1	8.56915	8.74483	9.13528	8.62622	9.28112	9.03542	8.42242	9.10755	8.91073	8.81651	9.38782	9.75642	8.24214	9.287	9.72086	7.79811	8.48843	9.003
ENSDARG00000004869	penka	3.46498	3.46117	3.45998	4.14326	3.58747	3.45993	3.69455	3.45943	4.48521	4.26429	3.91372	3.96016	4.32396	3.45851	3.46045	4.20601	3.45895	3.49528
ENSDARG00000004870	psen1	9.7841	9.62115	9.24286	9.6297	9.25524	8.7607	8.83199	9.26588	8.94305	9.19627	9.55983	8.97909	9.34877	9.27873	8.82902	9.60688	9.17684	9.2193
ENSDARG00000004871	mst1rb	4.01823	4.01232	4.01046	4.73333	5.14668	4.30569	4.11672	5.0307	4.41491	4.19691	4.61342	4.65047	4.65347	4.00817	4.52396	4.63884	5.31042	4.54994
ENSDARG00000004874	spata6l	2.52728	2.52305	2.5217	2.52481	2.52296	2.52164	2.8345	2.52108	3.69044	3.03387	2.52475	3.44766	2.68741	2.52003	2.52224	3.13042	2.97009	2.52111
ENSDARG00000004875	tmc6b	8.71405	8.54166	9.063	7.88544	7.49787	7.87437	8.22693	7.5766	8.96166	8.66977	8.90384	7.12734	8.4366	8.38631	8.08664	8.67623	7.66558	8.69674
ENSDARG00000004877	rock2b	9.14648	10.4343	10.2768	9.43249	10.2159	10.2297	10.205	10.9114	10.6512	10.3001	10.7091	11.3258	9.7966	10.887	10.9008	10.1754	9.9724	10.404
ENSDARG00000004880	acsm3	6.55292	7.6982	7.01452	6.43553	7.83741	7.64467	7.75685	8.08261	6.49839	7.22934	8.51405	8.92617	7.51866	8.95844	8.69225	7.98302	7.68068	8.03567
ENSDARG00000004889	aga	6.2588	6.0052	4.3181	6.1041	6.5143	5.59815	5.29916	6.83097	5.69637	5.98219	6.42061	6.66408	5.76912	6.34617	6.92775	6.89371	6.51013	5.98368
ENSDARG00000004891	pex19	8.30706	8.06162	8.74885	8.37007	8.63188	8.85199	8.44022	9.08558	9.08983	8.38798	8.86518	9.16872	8.61777	8.71461	9.05026	8.31957	8.92395	8.78201
ENSDARG00000004898	zp2l2	1.01477	1.01422	1.01404	1.01445	1.06137	1.18127	1.01488	1.01397	1.0138	1.0148	1.01444	1.01457	1.23315	1.1153	1.01411	1.26124	1.10709	1.01397
ENSDARG00000004904	gys2	3.62725	3.57697	3.55982	4.45066	4.21374	3.63232	5.12147	3.55168	6.06036	5.35733	5.35161	5.49075	4.50693	6.47838	6.81383	4.11296	4.98001	5.04819
ENSDARG00000004906	stip1	10.9465	10.8221	10.8098	10.3156	10.3231	10.8226	10.6323	10.2537	10.9963	9.90388	10.5934	10.6123	10.2364	10.7153	10.6898	10.5459	10.6458	10.654
ENSDARG00000004925	immp2l	5.0733	5.50733	4.83257	4.86901	5.4776	5.09798	5.30681	5.6924	5.35511	4.73878	5.18522	5.23332	5.09037	5.0895	5.43561	5.10897	5.27192	5.18011
ENSDARG00000004930	lmo7a	7.61558	10.0537	10.2678	8.13591	10.3562	10.5319	9.11282	9.86066	10.416	9.56989	10.5992	9.26914	8.60518	10.736	10.624	8.46087	11.6857	10.7547
ENSDARG00000004931	slc8a3	6.60382	6.15248	5.64785	6.4992	4.79323	6.01787	5.39089	6.46344	6.94134	6.89312	6.05845	4.16789	7.62109	5.93192	6.07026	7.38028	5.67657	5.64085
ENSDARG00000004932	anos1b	6.8606	8.49699	7.91529	8.98725	8.39224	8.26267	9.21126	7.11373	6.24797	9.04003	5.94966	8.10866	8.56051	6.31044	6.4557	7.94755	6.65765	6.1964
ENSDARG00000004937	skp2	8.36324	9.50117	9.1113	7.41936	5.51187	6.19875	7.12265	5.69046	5.86196	6.6348	7.11702	6.80451	6.65773	6.06099	6.30382	6.37324	6.23716	5.66426
ENSDARG00000004939	mtdhb	9.03769	8.28034	8.65888	8.88224	7.81178	8.52318	8.49559	8.52278	7.91936	7.87465	8.55424	8.06476	8.84071	8.00835	8.33695	8.80987	7.85231	7.75091
ENSDARG00000004948	bccip	9.1128	10.2259	8.881	8.50143	9.4255	9.34718	8.80674	9.78201	9.94952	9.13067	9.75452	10.2824	8.61158	9.34429	9.65958	8.68274	9.58984	9.59383
ENSDARG00000004952	rsad2	0.321552	0.321031	0.320867	0.321247	0.32102	0.32086	0.563607	0.320791	0.320638	0.321577	0.321239	0.321361	0.74956	0.320665	0.320932	0.321386	0.320726	0.320796
ENSDARG00000004953	mxb	0.998318	0.997498	0.99724	0.997838	0.997481	1.14355	0.998476	0.997121	0.996879	0.998357	1.23173	0.998017	1.12392	1.04014	0.997343	1.51234	0.997018	0.997128
ENSDARG00000004954	grna	3.03589	2.51451	6.51356	5.95153	8.40388	7.00497	5.87939	9.50626	8.09696	4.47472	10.0095	8.26622	5.85957	10.398	9.61168	6.15709	10.6939	11.098
ENSDARG00000004956	zmat2	8.36906	8.04074	8.39354	8.31589	9.1192	8.72386	8.63174	9.41172	7.72545	8.63711	8.31643	8.74128	8.01512	7.96115	8.68934	8.34521	8.46637	8.46182
ENSDARG00000004964	cyp4t8	6.60051	5.32963	3.42797	4.63005	5.4738	4.57999	5.18209	8.16769	7.30411	3.67951	7.02629	6.5283	5.17957	7.81086	7.46106	4.8733	7.4468	7.06259
ENSDARG00000004979	elovl5	6.41932	7.3345	7.03372	6.43018	5.5783	3.97807	5.73495	6.14482	6.73696	5.89846	5.82762	6.18378	5.93991	7.134	7.57639	5.98045	7.64978	7.74155
ENSDARG00000004988	ppp3ca	6.96728	5.33762	2.89539	9.0428	7.71255	7.50455	7.76623	7.69168	7.55118	9.40056	7.36683	8.44635	9.76192	7.0088	8.08771	9.87669	7.1931	7.07506
ENSDARG00000005002	brf1b	8.41859	8.61608	9.12507	8.14717	7.75136	7.58282	7.65874	6.7527	7.75561	7.68462	7.42587	7.481	7.88433	7.09807	6.8897	7.63629	7.23227	7.54719
ENSDARG00000005004	slc5a12	4.07428	3.61229	3.60879	3.67255	3.61206	3.81765	4.43827	4.78393	4.64395	3.62376	3.61671	4.59608	4.48455	4.72973	4.64827	4.58951	4.62277	3.60726
ENSDARG00000005010	si:dkeyp-2e4.8	4.78279	4.87511	4.84868	3.99714	3.88509	4.6585	4.60854	4.72464	5.00218	3.857	4.35127	3.85237	4.47132	4.27211	3.8784	4.23764	4.68061	5.01127
ENSDARG00000005015	tspy	9.71794	9.58336	9.41277	9.24832	8.58469	8.90497	8.99929	9.58747	9.76336	8.90841	8.79093	9.91165	9.02487	8.78278	9.31287	9.1122	9.06738	9.04963
ENSDARG00000005023	fkbp9	10.357	9.99146	9.29872	9.68149	8.90749	8.57739	10.3345	8.04106	9.68643	10.1368	8.68076	8.64832	9.91286	8.03669	8.03383	10.0325	8.35754	7.37683
ENSDARG00000005026	tshz1	10.1861	8.47338	9.52343	10.7134	9.33889	9.46791	9.81076	8.96373	8.9569	10.7682	8.87795	8.84344	11.0612	9.23814	8.85791	10.7338	9.16974	8.51193
ENSDARG00000005034	ispd	5.60536	6.868	6.9764	6.54654	7.23738	6.72205	7.21655	7.18009	3.94933	7.76191	5.88416	7.53966	6.9312	7.30362	7.4228	6.5071	7.1957	6.57916
ENSDARG00000005049	rab20	5.05331	6.4205	6.41191	5.92838	8.90935	9.00754	6.1061	9.33458	7.00512	3.37011	9.62135	9.82463	5.52305	8.6325	9.32104	6.70801	9.02317	9.07257
ENSDARG00000005050	wnt2ba	2.90618	2.90378	2.90303	3.00309	3.48484	2.903	3.35858	2.90268	2.90197	3.55204	2.90474	3.30385	2.96932	3.18979	2.90333	2.90541	3.44581	3.36984
ENSDARG00000005057	dimt1l	7.05051	7.08159	4.27452	6.27087	6.80693	6.29585	6.61606	6.85763	7.05508	7.20444	6.59623	6.78501	5.95285	6.551	6.85016	6.61374	6.63209	7.15285
ENSDARG00000005058	ncapd2	12.2574	12.2942	12.2935	10.6875	9.83103	10.086	10.648	10.3347	10.1794	10.1101	10.1266	9.92956	10.2568	9.8122	9.72154	10.3567	9.53004	10.1021
ENSDARG00000005078	eif4e3	8.6047	8.20958	7.54683	8.925	8.96549	8.84178	9.00242	8.87579	9.34889	7.91065	8.71486	9.14204	8.77544	8.86182	8.85128	8.80721	8.91443	8.7592
ENSDARG00000005085	ggctb	5.95253	4.8977	5.64307	5.99181	6.03385	4.1975	5.79177	6.13587	7.05563	6.68358	6.48771	6.84351	6.8995	5.50219	5.63129	7.21823	6.35662	6.40906
ENSDARG00000005092	cep89	7.82528	7.40032	8.46808	8.1078	7.20176	7.22907	7.59125	6.87919	7.13672	8.02894	7.08056	6.87156	7.48041	6.84039	6.82149	7.46203	6.89225	6.72635
ENSDARG00000005095	glcea	4.79945	4.03645	4.02642	5.42362	4.80653	5.45725	4.27284	5.23906	5.69959	5.77773	5.22575	5.14223	6.34055	4.80878	5.28408	6.35954	4.73384	4.64318
ENSDARG00000005098	zgc:86764	8.54169	8.771	9.44705	7.98103	7.68462	6.80732	7.68036	8.47262	7.35525	7.13685	7.54988	5.45053	7.32502	7.10888	7.79	7.69577	6.30607	6.22293
ENSDARG00000005104	limk2	8.85931	8.28712	7.61406	8.89138	8.44457	7.56266	8.90371	8.53974	8.10078	9.01586	8.82339	7.74315	8.90973	8.54638	7.7257	8.89432	7.90278	7.79068
ENSDARG00000005108	oclna	7.85154	6.28652	3.66595	7.17229	6.50409	6.47306	8.09544	6.89366	7.41181	7.38348	8.51897	7.7127	6.1295	6.47623	6.15608	6.70858	4.60256	6.46881
ENSDARG00000005112	cdh17	8.07075	6.66242	5.56417	8.30685	7.22145	5.46583	7.72085	9.17992	10.1863	8.04474	9.667	9.13738	7.24788	9.9562	9.80409	7.4977	10.21	8.58337
ENSDARG00000005115	calub	9.25642	8.57116	9.6317	9.11297	8.16812	8.73377	9.49002	8.41824	8.43852	8.94026	7.73586	8.46713	9.09649	8.76475	9.0224	9.73386	8.75986	8.56979
ENSDARG00000005122	atp2a2b	11.6337	11.4351	11.3397	11.0733	10.82	11.0051	11.1391	10.1151	10.5913	10.4567	10.7208	10.4344	10.9804	11.7947	10.8177	10.5531	11.4027	11.4638
ENSDARG00000005126	large1	10.7015	9.28018	8.99829	10.3917	9.68567	10.132	10.0957	10.0811	9.33961	10.1591	10.0804	10.6768	10.6319	10.303	10.1104	9.73674	9.82081	9.66082
ENSDARG00000005128	rnaseh2b	8.80802	9.34097	8.15915	7.81233	7.90033	6.93612	8.17621	7.74987	7.66618	5.4946	7.96915	8.57448	7.32779	7.61483	7.49222	7.13259	7.39215	6.79825
ENSDARG00000005134	psmd11b	8.74624	9.33867	9.75224	9.31678	8.50028	9.1014	9.07154	9.31685	8.64036	8.24088	8.46292	8.81259	8.71897	8.88603	8.69456	8.47682	8.86232	8.88386
ENSDARG00000005139	hhatlb	4.71596	3.95263	5.76709	4.2758	5.04054	4.51514	3.98214	5.1406	3.93288	5.04158	4.53746	4.97912	4.78108	6.15847	5.89049	4.8813	5.3515	4.99468
ENSDARG00000005141	camkvb	4.71537	3.84383	5.54994	5.19402	3.84255	5.11261	5.79805	4.85645	4.93314	5.68166	5.91152	5.02436	7.29299	5.63618	5.25374	6.93926	5.1092	4.0957
ENSDARG00000005150	tbx20	6.77265	9.52802	9.24478	7.90652	8.97677	9.60004	6.19863	7.80605	7.67146	7.56079	7.50744	6.87026	7.02838	7.45262	7.27948	7.01277	9.10304	8.30138
ENSDARG00000005154	aspa	5.54249	5.92476	5.75978	4.63591	6.75787	6.86277	6.14227	7.94821	7.77431	6.43913	7.94417	8.43688	6.30816	8.38571	6.98675	6.15257	7.56055	7.56006
ENSDARG00000005159	cyth1a	7.24757	7.14705	7.72439	8.02702	8.40034	9.02454	8.29733	8.73154	9.05371	8.67577	9.01057	9.48083	8.87758	8.97717	9.16042	8.53756	8.42084	8.66488
ENSDARG00000005162	tpm3	11.35	11.6296	11.6467	10.7409	12.1862	12.2318	11.2581	12.6817	12.7846	10.7444	12.5475	13.0144	10.856	12.605	12.8592	11.3324	12.4821	12.8889
ENSDARG00000005163	efr3a	7.64995	7.99329	8.4252	8.25416	8.32889	8.78759	8.55794	9.3556	8.70451	8.42494	8.92887	9.15587	8.78849	9.57933	9.14181	8.42824	9.33846	9.21504
ENSDARG00000005172	dynll2b	5.56235	5.31303	6.64915	5.98452	7.43414	7.31392	7.37368	7.89505	7.08022	6.99731	6.78848	7.38985	6.88236	7.37712	7.51781	7.51989	7.7033	7.89035
ENSDARG00000005176	zgc:101040	4.93532	4.2053	4.90181	5.11061	5.49318	4.38556	4.85894	5.4503	5.73927	5.16791	4.79425	4.85166	5.19883	5.85569	6.032	4.50051	5.30446	5.07645
ENSDARG00000005179	dglucy	6.50823	6.50633	6.00851	5.99018	6.39909	6.38278	6.6226	7.6281	3.93707	5.68553	7.44273	7.14562	6.98954	7.639	7.34943	6.94721	7.24074	7.48889
ENSDARG00000005185	cpn1	0.785742	0.972284	0.74365	0.834547	0.743783	0.848389	0.831406	0.743584	0.743451	0.74427	0.805105	0.779285	0.819735	0.743474	0.743707	0.744103	0.743527	0.743588
ENSDARG00000005186	sp4	8.74879	8.27143	9.42675	9.56589	8.6855	8.17091	9.39857	8.06637	8.15821	9.48077	8.91875	8.50475	9.68359	8.78433	8.36377	8.80405	8.50491	8.63322
ENSDARG00000005191	ahcy	11.0762	11.3489	11.2794	10.6345	11.3985	11.1019	10.9575	11.6195	11.7105	10.8415	11.8977	11.8015	10.4794	11.9568	11.8614	10.666	11.4023	11.4903
ENSDARG00000005210	coro2a	6.62222	6.03093	6.43637	6.47271	4.83299	5.40195	6.60182	5.48131	7.03299	6.2825	6.33151	4.99939	6.04775	5.22042	4.15644	6.0242	5.6958	4.55537
ENSDARG00000005216	zgc:158328	9.49326	8.74627	8.27118	8.59741	9.60132	9.34622	9.16037	7.99195	8.81922	8.77663	8.18216	7.15929	9.02409	8.12969	8.42353	9.79197	8.41656	8.02763
ENSDARG00000005218	wrnip1	4.87505	5.24839	4.86095	4.80958	4.99019	4.61266	5.29061	5.11874	5.0476	4.88398	5.39651	4.80414	4.75379	4.79687	5.09614	4.75606	5.10477	5.18365
ENSDARG00000005220	pdcd6	5.75509	7.58013	8.63237	7.85951	10.1922	10.3426	8.60323	9.97809	10.1832	8.27483	10.4732	10.6347	8.04714	9.29337	9.80198	8.7668	10.0424	10.5623
ENSDARG00000005221	desmb	3.15162	3.11441	3.1018	3.7186	3.65394	3.87445	5.80401	4.66641	5.47296	5.08927	3.1298	3.13845	5.47264	3.78123	3.10689	3.14019	4.00628	3.81169
ENSDARG00000005230	ssr2	9.40769	9.50911	9.30787	9.54433	9.86898	9.54838	9.68699	9.61867	10.4	10.1556	9.78332	9.55771	9.23163	9.4755	9.86656	8.90256	9.69479	9.34317
ENSDARG00000005232	ccdc85ca	8.52764	6.57031	7.97548	8.52374	8.10531	7.92279	8.53397	7.91411	7.2459	9.28369	7.31615	6.77026	8.42837	7.26779	7.31171	8.10817	7.77184	6.82891
ENSDARG00000005236	srcap	13.0881	12.2266	13.1473	12.9779	12.0437	12.355	12.364	11.6899	10.9346	12.1164	11.5967	11.4375	12.6445	12.2056	11.6391	12.2667	12.1779	12.1034
ENSDARG00000005246	asb3	5.71758	6.02208	6.34451	5.96606	6.12352	5.65019	6.18475	4.25739	4.2413	6.49939	5.19824	5.59437	6.258	6.38452	5.2862	6.72156	5.75793	5.99805
ENSDARG00000005251	rpe	7.57563	7.59595	7.0411	6.59575	7.60733	7.5162	8.02048	8.1856	7.51255	6.23461	8.06874	8.28732	6.86315	7.89654	7.75168	6.96826	7.8822	8.36588
ENSDARG00000005254	kdelr2a	9.92853	10.3902	10.3418	10.185	10.4218	10.2353	10.2312	9.64902	10.481	9.85998	10.3374	9.69929	9.81281	9.8328	9.895	9.47472	9.71332	9.62453
ENSDARG00000005271	zc3h12a	2.79983	2.79214	3.69172	3.45782	2.79198	3.17345	2.96529	2.78854	2.7862	4.53907	3.97816	2.79704	2.90946	3.13773	3.0139	2.79741	3.15032	2.82173
ENSDARG00000005274	rad52	6.50569	6.55142	7.41498	5.95764	5.78019	5.83439	5.90558	6.52842	4.17226	5.49597	6.39532	6.49721	6.18887	4.13364	5.58452	5.70241	5.90298	5.59671
ENSDARG00000005284	fbxl15	6.32991	5.73848	5.26179	5.71588	6.66112	6.11519	6.25911	6.10431	6.03519	6.6126	6.05885	7.0072	6.17362	6.16914	6.21591	5.35799	5.76781	5.59598
ENSDARG00000005315	celf1	10.6622	10.2363	10.1876	9.86776	10.2248	10.348	9.90757	10.3259	9.57057	9.5719	9.73136	10.0927	10.1681	10.1231	10.1348	9.41685	10.1541	9.95205
ENSDARG00000005318	stam2	9.15805	9.042	9.14059	8.43775	10.1815	10.5462	9.25006	10.1218	8.92304	9.04377	10.0189	9.95616	8.71631	9.99888	10.303	8.92832	9.97935	10.1072
ENSDARG00000005320	nipsnap1	3.279	3.26829	3.26485	3.44511	3.76242	3.26471	3.93256	3.97027	4.64439	3.2795	4.44008	3.27511	3.26304	4.85977	4.54098	3.27562	3.9275	3.69406
ENSDARG00000005327	ftr66	1.15026	1.14924	1.14892	1.14966	1.53726	1.14891	1.15046	1.14878	1.14848	1.15031	1.14965	1.14989	1.14876	1.14853	1.40455	1.14994	1.18458	1.71908
ENSDARG00000005332	lipib	4.85134	4.32236	5.11542	4.38877	4.13483	4.34449	4.66615	4.37939	3.72017	5.58286	4.41289	4.28007	4.9143	3.7682	3.72845	4.12947	4.27235	3.72464
ENSDARG00000005335	slc22a4	2.29469	2.29209	2.29126	2.29317	2.29203	2.45586	2.29519	2.29089	3.15552	2.29482	2.29313	2.29374	2.47016	2.45653	2.82782	2.47575	2.90299	2.56117
ENSDARG00000005343	ccdc85al	5.09074	4.98958	3.86271	5.59181	3.87481	4.55041	6.00276	4.84681	5.50219	6.08539	4.43745	4.24688	6.38092	4.47425	4.42862	6.39736	5.54969	4.23319
ENSDARG00000005350	dip2ba	10.2568	10.4941	10.6564	10.1415	10.1974	10.4729	10.2187	10.1246	10.5459	9.62887	9.96794	10.2139	9.84917	10.5868	10.3083	9.78552	10.4352	10.658
ENSDARG00000005355	larp6a	7.26195	7.07352	3.99008	8.15269	7.88644	7.94466	7.76761	8.56478	8.26696	9.03609	9.0861	8.39556	8.6671	7.80123	7.67313	9.08566	7.8817	8.3444
ENSDARG00000005356	tyro3	8.22013	8.48531	8.44761	7.6274	6.52037	7.11629	8.54115	5.19879	6.66391	8.4295	7.13104	5.90529	7.85219	7.889	5.77926	7.39492	6.74266	6.29521
ENSDARG00000005359	sucla2	10.0519	9.8455	10.1928	9.33367	10.1794	10.3149	9.75379	9.76758	11.0013	9.91887	10.5983	10.4692	9.8546	10.439	10.6658	9.88859	10.6631	10.6493
ENSDARG00000005364	grin3ba	3.8962	3.2975	3.29295	4.35418	3.2972	3.29276	4.64069	3.29084	3.28649	4.59923	3.8915	3.30647	4.95737	4.3319	3.29478	5.10912	3.49165	3.6781
ENSDARG00000005368	mcamb	10.0022	11.7848	11.5178	9.16197	9.83557	9.4035	10.175	9.7779	10.5412	10.272	8.8947	9.23824	9.60034	9.56003	8.59027	10.5676	10.3636	10.4224
ENSDARG00000005371	gprc6a	1.60286	1.60072	1.60004	2.08628	1.60068	1.60002	2.66036	1.59973	1.59909	1.60297	1.60158	1.60208	1.87927	1.59921	1.60032	1.60218	1.59946	1.90489
ENSDARG00000005372	camk4	3.42097	3.36258	3.29296	4.22846	3.90752	3.82782	3.76514	3.99015	3.28406	5.41499	4.8157	3.31139	5.40807	3.28513	3.9593	5.00492	3.39613	3.37577
ENSDARG00000005374	tubgcp4	8.17305	7.95595	8.4118	8.32597	7.29472	7.95448	8.35065	8.2364	8.36089	7.74946	7.75164	7.40064	8.1818	8.06733	7.92171	7.58078	7.87819	7.53159
ENSDARG00000005382	prdm9	8.47182	8.7218	8.29741	7.80678	7.65309	7.87562	7.75651	7.12649	7.47201	8.25241	8.03238	7.2147	7.9805	7.44486	8.0875	8.14001	7.96089	8.01884
ENSDARG00000005394	dnmt3aa	9.50966	8.877	7.30404	9.39346	8.58269	8.81613	8.89051	9.17511	8.00786	9.08452	8.21724	7.72278	9.73613	9.47205	8.27344	9.00075	8.80739	8.77771
ENSDARG00000005397	trim3b	8.29874	8.09907	8.7143	9.27262	8.75656	9.30967	8.82723	8.32812	8.35087	9.22492	9.89569	10.1377	10.032	8.89987	9.41233	9.5065	9.17312	9.10407
ENSDARG00000005414	grapa	3.86227	5.86995	6.18703	6.29478	6.43063	5.22782	5.66288	8.24069	7.37232	5.92007	7.42782	6.96465	6.03479	7.76544	7.67414	4.16972	8.06748	7.69838
ENSDARG00000005416	map3k5	8.17514	8.81103	8.96095	8.49051	8.98847	9.28895	8.83253	9.42714	8.38578	9.18369	9.53839	10.0108	8.74179	9.7491	9.87415	8.56061	9.52394	9.56698
ENSDARG00000005423	pgam1a	6.5686	6.75057	6.61997	7.37297	9.5839	9.06072	8.13315	9.27022	9.46707	7.86881	9.33369	9.39959	7.8809	9.45607	9.39964	8.48888	9.40757	9.15734
ENSDARG00000005425	wdfy1	9.03892	8.7972	8.21544	8.54036	9.19785	9.19525	8.53436	8.83136	9.59739	8.48643	8.99449	9.64214	8.65394	9.33594	8.9718	7.56486	8.98034	9.65395
ENSDARG00000005448	mtfmt	5.25852	5.42196	6.4118	6.14848	5.39072	6.32709	5.16692	6.87214	4.18809	6.45587	7.01811	5.30427	5.41427	6.0275	5.41779	5.84356	6.29848	5.57593
ENSDARG00000005451	gdi2	12.0499	12.1511	12.6089	11.6215	12.4852	12.7708	11.752	12.2807	12.0315	11.6622	12.3311	12.6021	11.5284	12.3171	12.5836	11.9665	12.3213	12.7048
ENSDARG00000005453	foxp2	8.28542	7.37954	7.9035	10.5788	8.38963	8.8709	9.90429	7.28612	8.71938	10.2366	8.29612	8.43382	10.7811	8.2605	7.91449	10.4742	8.55671	7.67844
ENSDARG00000005454	tacc3	11.0224	11.5138	11.7841	10.2821	9.26166	9.24187	9.95343	10.0409	9.0365	9.8814	9.80846	9.01502	9.47552	9.04608	9.2072	9.23654	8.84955	8.36643
ENSDARG00000005456	katnb1	9.80109	8.92228	8.67643	8.77499	9.69093	9.78034	9.10284	9.57723	9.94196	9.05307	9.45182	10.399	8.51735	10.0064	10.2207	8.50732	9.70259	9.73967
ENSDARG00000005458	csnk1g2a	9.63552	9.924	10.0046	9.66269	9.76625	9.90092	9.32164	9.37098	9.10702	9.55387	9.12651	9.86374	9.46985	9.13017	9.41312	9.83226	9.47463	9.36689
ENSDARG00000005462	kif4	11.0007	11.0455	11.1234	10.2707	8.25052	9.03808	9.71722	7.75339	10.1112	9.20657	9.1456	7.86362	9.58743	9.33689	8.64204	9.82018	8.40465	9.12325
ENSDARG00000005463	slc30a1a	8.6711	8.12796	8.68627	8.60585	8.75328	8.68787	8.05249	9.55831	9.11406	8.23593	9.18561	8.48396	8.0793	9.80323	9.68575	8.62383	9.70091	10.0659
ENSDARG00000005464	dnase1l1	7.36184	7.80648	7.79163	6.34209	7.43352	7.01826	7.3672	6.74336	7.43277	6.23317	7.17662	7.61091	6.71498	7.54109	7.43632	6.5144	7.66664	7.5195
ENSDARG00000005468	irf2bp1	9.42171	9.13876	9.53147	9.0584	9.20272	9.22702	9.21481	9.57984	8.94943	9.4046	8.60394	9.86145	9.06347	9.28684	9.28229	9.12737	9.55194	9.48193
ENSDARG00000005476	nav3	9.55719	8.07275	8.66116	10.2867	8.434	9.26461	10.5124	9.22961	8.86903	10.2835	9.12637	7.37781	10.7093	9.44034	8.76756	9.85271	10.7476	9.30641
ENSDARG00000005479	tenm3	12.0057	11.3209	11.4784	12.7035	11.401	11.3179	12.6621	10.2678	11.0144	12.4713	10.6089	10.1909	12.8643	10.4217	10.2669	12.7882	12.0288	10.8046
ENSDARG00000005481	nfkbiaa	6.43047	7.03257	7.83611	6.48101	9.30012	8.2676	6.59897	12.0108	11.7568	7.93068	11.5737	11.0095	8.22396	11.2979	11.717	9.71425	12.2638	12.6589
ENSDARG00000005482	rapgef2	10.3624	9.84188	10.0908	11.7208	10.494	11.0351	10.9032	10.5143	10.8566	11.5673	10.2799	10.329	11.8819	10.7812	10.5757	11.551	10.2978	10.1071
ENSDARG00000005485	ucmab	4.66168	3.17093	4.9001	5.36572	3.71985	5.24722	8.12828	7.97603	7.82935	8.67884	7.83229	6.50342	8.3477	7.44884	7.03486	8.88712	5.46588	6.09272
ENSDARG00000005500	dgcr6	5.92441	6.42013	6.17102	6.39858	6.52028	6.40147	6.13225	6.24771	6.51311	6.72489	6.60192	5.54813	6.04901	6.27836	6.43903	6.19398	6.22427	6.33863
ENSDARG00000005510	gdf6b	3.33945	6.51912	6.78948	4.07289	5.71611	4.57171	4.93445	3.02545	5.2725	3.14895	3.1004	3.11856	4.37081	4.60812	3.05057	5.09566	4.09427	3.2123
ENSDARG00000005513	naca	11.7583	11.7531	12.8354	11.4639	12.0348	11.875	11.3286	12.3359	11.6325	11.6758	11.8799	12.9043	11.3753	11.7885	12.3481	12.0207	12.3387	12.4109
ENSDARG00000005518	slc5a9	4.59664	3.49789	3.49427	4.36134	4.62724	3.49412	3.9095	3.49259	4.99836	3.5097	3.87947	4.33091	3.70797	4.62576	4.7338	3.50561	3.99858	3.71406
ENSDARG00000005522	galr1a	0.920748	0.920062	0.919847	1.02383	0.920048	0.919838	1.14844	0.919747	0.919545	1.27404	0.920337	0.920497	1.18211	0.919581	0.919933	0.920529	0.919661	0.919753
ENSDARG00000005525	acy3.2	6.91258	7.21275	7.66069	6.84829	7.97379	7.17973	7.41065	8.65269	9.25486	7.14118	8.82798	7.45115	6.80221	8.17913	8.68445	6.46002	8.02044	7.47752
ENSDARG00000005526	igfn1.1	4.23504	3.60338	5.46552	7.40725	7.41663	7.47996	6.69966	3.46663	7.71159	6.96399	7.20636	7.17953	6.91036	8.38385	7.80768	6.77374	7.92773	7.36126
ENSDARG00000005536	ubr7	9.60415	9.19965	9.9955	9.40076	8.78006	9.18722	9.08224	9.30072	9.66141	9.001	9.16379	9.9325	9.07018	8.77659	9.29003	9.77639	9.20669	9.19667
ENSDARG00000005540	xpo7	10.8746	11.2865	11.4099	10.6018	9.25044	9.51751	9.78208	9.53261	8.44444	10.1637	9.57455	9.48586	9.89528	9.4249	9.10239	9.55091	9.10388	9.1511
ENSDARG00000005541	wif1	7.73391	8.5039	7.68633	7.63979	8.16005	7.05992	8.21589	7.80139	8.22235	8.80818	7.05154	7.41038	8.1654	6.97561	6.49613	8.88775	8.10764	7.68901
ENSDARG00000005544	btbd3a	7.2979	6.88141	6.15649	7.03973	7.12464	7.14926	7.03218	7.73027	7.54217	6.46801	7.38742	7.15666	7.13831	7.57518	7.46549	6.59156	6.76807	6.36818
ENSDARG00000005547	rint1	7.31888	7.86646	7.49274	7.43318	7.13993	7.53111	7.4257	8.05702	5.98278	7.49193	7.292	6.84329	7.36145	7.25373	7.49677	7.90531	6.80694	7.11812
ENSDARG00000005549	znf710b	9.11108	7.94016	8.00603	9.32294	9.37106	9.17364	9.34909	9.06066	8.73695	9.00203	8.89761	8.92671	9.67964	9.39864	9.2161	9.13784	8.74883	8.54384
ENSDARG00000005551	hnrnph1l	10.0785	9.34611	8.64851	9.62887	9.30579	9.11287	9.24674	8.76346	8.4066	8.61675	8.42402	8.4073	9.37321	8.94563	8.74411	9.04539	8.52559	8.31662
ENSDARG00000005559	pou4f1	4.35603	4.00179	5.02205	7.26459	4.85565	6.04941	6.45819	6.38798	5.69035	6.4478	6.30349	5.97735	7.41869	5.25102	5.74094	6.94177	5.83327	4.93523
ENSDARG00000005560	ywhah	9.71107	9.39639	8.88203	10.767	10.553	10.4883	10.2792	9.77141	9.27253	10.167	9.49793	9.19705	11.265	9.68563	9.54624	10.7267	9.48275	9.41017
ENSDARG00000005561	gfm2	6.30213	8.07487	7.74612	7.84585	7.37468	7.48175	7.83336	7.04779	5.98195	6.98182	7.21426	6.59001	7.40971	7.49328	6.95732	7.58192	7.07659	7.33229
ENSDARG00000005565	entpd8	3.15597	3.53331	3.71501	3.15199	3.14901	3.43431	3.15727	3.14598	4.5929	3.95903	4.12235	3.15349	3.43625	3.45872	3.14786	3.64197	3.66699	3.58358
ENSDARG00000005574	vsx2	8.07075	6.02598	4.54907	7.20532	5.92586	6.04668	6.19975	3.67997	6.13382	7.41194	5.56641	5.26289	7.25643	5.50467	5.7299	7.00487	5.57071	3.78134
ENSDARG00000005576	mphosph8	10.4448	10.7247	10.3617	10.6413	10.3902	10.529	10.2239	10.4841	10.6953	9.73767	10.216	10.4207	10.5654	10.5459	10.6213	10.5217	10.5434	10.7001
ENSDARG00000005578	ugp2a	4.61296	3.93503	5.96586	5.64904	7.30387	7.1258	6.86208	8.46818	9.4289	5.92702	6.81689	5.57693	6.25041	8.97783	7.89655	5.64161	7.71321	6.61153
ENSDARG00000005586	zbtb20	5.16114	3.75347	6.78684	8.16719	4.85003	6.45811	6.34873	6.86012	7.76571	7.41947	6.03484	5.43971	8.07007	6.77016	6.00574	7.46224	6.76388	5.34483
ENSDARG00000005590	mtf2	9.46875	9.52824	8.87708	9.08965	7.60249	7.95026	8.79553	7.71106	8.05421	8.47391	7.90819	8.34097	9.03642	7.92346	7.59093	8.95828	7.76306	7.7221
ENSDARG00000005593	rxrga	7.26961	6.23735	6.75074	7.72522	7.63877	8.24696	6.42955	8.07832	7.75961	6.42567	7.14618	7.85932	6.29	7.50325	7.78691	6.90702	7.43335	7.45444
ENSDARG00000005595	adgb	4.01018	4.19244	4.73976	4.3217	4.74809	5.12221	4.78329	3.76988	3.7652	5.6535	4.77087	4.40475	4.49497	3.76604	3.81617	4.48099	5.06676	4.29407
ENSDARG00000005606	paxip1	10.1042	9.86747	9.85677	9.60193	8.05124	8.08843	9.29248	8.7451	9.21558	9.18219	8.72166	7.97608	8.86382	8.71229	8.16476	9.20127	8.61538	8.46404
ENSDARG00000005612	aph1b	8.2549	8.70193	7.749	7.7895	8.63725	8.41248	7.57101	7.43054	5.80243	6.92495	8.43117	7.9828	7.45622	7.87845	7.56713	7.38571	8.19914	7.63325
ENSDARG00000005616	bfb	2.81803	2.80298	2.79804	3.29886	2.86697	2.79784	2.82083	4.44624	2.79096	2.81872	2.80912	3.73476	2.79542	4.51994	3.90007	2.81334	3.64752	3.89454
ENSDARG00000005619	nek2	7.29687	7.55728	7.32559	6.97694	5.30859	5.41528	6.71919	5.75521	6.48583	5.90774	6.26854	6.82553	6.31025	5.67721	5.50779	6.70813	5.91425	4.21449
ENSDARG00000005625	maco1a	7.92531	8.13997	8.94727	8.65605	8.0437	8.18601	8.5248	8.05584	7.21467	9.38516	8.19311	7.91744	9.20474	8.07819	8.0676	9.43086	8.27767	8.28076
ENSDARG00000005626	si:ch211-133l11.10	4.11384	3.4881	3.48689	4.16958	3.72591	3.87653	3.93522	3.48633	4.28975	4.02726	3.48963	3.79692	3.9761	3.65647	3.88769	3.70945	3.75854	3.5735
ENSDARG00000005627	zmp:0000000527	5.28482	5.12605	5.26073	3.89736	5.10222	4.1356	4.16732	3.87921	3.87292	3.91011	5.15083	4.76856	4.8866	5.10698	4.52346	4.38195	5.72352	5.8757
ENSDARG00000005629	smyd2b	7.71473	7.01458	7.05792	6.60689	6.86753	6.75441	6.46758	6.53288	7.47781	7.01184	6.72431	6.32971	6.77321	6.34659	6.64533	6.6079	7.03016	6.02004
ENSDARG00000005640	adat3	5.66748	5.46907	4.77589	5.27152	5.05427	4.8728	5.29298	5.17555	4.21041	4.97091	5.68704	5.49866	4.54212	4.49832	5.50597	4.91901	4.88916	5.16079
ENSDARG00000005643	gcat	7.80987	8.44366	8.0367	5.86434	7.72153	7.49588	6.56833	7.21049	7.45751	7.4559	7.91018	7.56535	6.56306	7.87928	7.61801	6.85658	7.77891	7.95844
ENSDARG00000005645	robo3	10.7729	9.23716	9.2235	11.6705	9.81462	10.1556	10.6763	9.10032	9.26009	10.8661	9.24313	8.18429	11.0036	8.41427	7.46171	11.2456	8.9206	8.64317
ENSDARG00000005648	olfml2a	6.97101	8.7574	8.85138	7.87516	8.6902	8.40532	9.16786	7.67692	6.56327	9.38984	7.69925	6.85175	8.49549	7.24462	7.39023	8.5111	8.22855	7.1146
ENSDARG00000005651	hrasb	7.83635	7.11283	6.85083	8.19404	7.77918	7.3232	7.81114	7.30348	8.26273	7.92477	7.24868	7.70239	8.88899	6.56809	8.10982	8.17404	7.48125	7.56583
ENSDARG00000005652	man1a1	8.83363	9.92606	10.4426	9.10327	8.15038	8.62818	9.63958	8.80566	9.16943	9.8459	9.46829	9.149	9.96869	9.68825	9.40784	9.55526	9.15807	9.32895
ENSDARG00000005670	ttbk2a	6.64445	6.50041	6.53899	8.24745	7.31422	6.80026	7.87466	7.60375	6.82101	8.15303	5.60002	5.75056	8.69048	6.78426	5.72882	8.02932	6.81896	6.60893
ENSDARG00000005673	f3b	4.29136	8.58319	9.12134	7.71436	9.77797	8.70894	6.96555	7.88069	8.8553	8.36206	8.03257	5.79121	8.73449	9.03133	8.57524	7.32696	9.46442	8.14979
ENSDARG00000005675	sec61a1l	9.01451	9.00334	8.54834	8.93813	8.57061	8.36012	8.94707	8.94838	9.20198	8.78574	8.37609	8.39595	8.82277	8.73356	8.7585	8.84051	8.39633	8.48613
ENSDARG00000005679	trip10a	7.6137	8.6605	8.82678	7.99456	8.99093	8.49018	8.72361	9.6125	9.38596	8.32551	8.44429	9.19207	7.98284	8.81853	9.52301	8.41755	9.57554	9.56841
ENSDARG00000005690	slc25a23a	8.13951	7.2838	7.02166	8.01472	7.73875	8.18251	8.06998	7.85261	9.05191	7.65844	7.61142	7.72033	8.33997	7.64002	7.53892	8.36714	7.97953	7.29286
ENSDARG00000005699	ddx19	10.6299	10.0121	10.2066	9.65151	9.19016	9.7639	9.97709	9.85455	9.61716	9.02744	9.05186	9.19805	9.16794	9.22058	9.75284	9.20849	9.68385	9.6615
ENSDARG00000005704	eps8l3b	4.28854	3.93107	3.92713	4.47503	5.14033	4.96549	4.49014	4.46399	5.16368	4.54057	4.83563	4.60957	4.26078	5.10618	4.60779	3.93949	4.99301	4.65219
ENSDARG00000005713	ethe1	4.58185	4.1871	4.16612	4.80993	6.20162	6.40395	6.32932	6.38217	6.81911	6.40022	6.67848	6.45918	5.43705	6.0491	6.16097	5.9606	6.19655	6.01646
ENSDARG00000005716	olfml2ba	3.56066	3.41861	3.36488	6.76479	6.19979	4.45176	7.76591	4.22828	6.86602	7.81502	6.19445	5.03278	7.1592	5.60829	4.28519	6.62578	5.14547	4.89926
ENSDARG00000005738	rpf1	7.97508	7.94878	7.7088	7.87644	8.01601	7.68678	7.49187	7.8493	7.72517	8.13206	7.70358	8.53053	7.68145	8.05521	8.10995	8.07438	7.86321	8.12345
ENSDARG00000005739	gpm6ba	6.50026	4.13387	8.07677	8.35645	7.24588	7.74883	7.57987	6.29534	7.43581	8.4156	7.0871	6.29765	9.07318	6.96119	6.48857	8.75914	6.07513	6.12762
ENSDARG00000005749	cand2	4.04499	4.01315	4.00265	4.4709	5.60445	5.3137	4.67715	5.47861	6.07638	4.04646	6.1378	5.9938	4.9726	5.71256	5.63206	4.87183	5.24137	5.5266
ENSDARG00000005754	ptprfb	11.6236	10.3008	10.5939	11.5237	9.8503	10.4933	11.2969	8.95395	10.8438	11.3212	10.8177	9.44102	11.317	10.2203	9.65143	11.2311	9.98785	9.69956
ENSDARG00000005762	col14a1a	10.7374	10.3687	10.6724	9.28001	8.54503	8.78129	9.31881	8.30554	8.94036	9.13026	8.34562	6.3695	9.30119	7.9609	7.09544	8.74401	8.54031	7.38432
ENSDARG00000005772	tsr2	7.77692	7.96935	7.66496	7.29362	6.97471	6.60795	7.18164	7.43694	6.97114	7.43613	6.52723	6.86212	6.90222	7.37565	6.93087	7.2434	7.30987	7.37641
ENSDARG00000005774	ddx3xb	12.5828	12.1488	12.2259	12.3265	11.6543	12.1324	11.6477	11.3733	11.1437	11.2688	10.9042	10.7183	11.7662	11.5075	11.5893	11.9596	11.577	11.7643
ENSDARG00000005775	scn8aa	7.00977	5.74255	2.56953	9.74321	6.60149	7.61557	7.82752	6.6406	7.41262	9.85127	8.01523	8.0254	10.7579	7.44792	7.52033	10.1988	5.90906	6.93689
ENSDARG00000005776	guk1b	3.37353	3.16901	3.15272	3.18943	3.16797	3.15205	6.26554	5.05305	5.97149	5.76416	3.18876	3.1998	5.76993	4.59918	3.15932	4.93426	4.52149	3.60288
ENSDARG00000005780	npy8br	2.78669	3.83117	3.42788	2.4093	2.40696	2.40529	2.41344	2.40457	2.40295	2.41267	2.40922	2.41047	3.08937	2.40324	2.40604	2.86986	2.81453	2.43604
ENSDARG00000005783	ncanb	7.88616	4.27816	2.65584	10.5147	7.54691	8.62273	8.44628	7.62164	7.32646	9.40029	7.81602	7.19666	10.1045	8.3206	7.7991	9.81318	6.17391	7.20132
ENSDARG00000005786	ppm1f	8.47812	9.22002	9.34267	8.30188	8.63139	8.80031	7.91077	8.57502	6.78742	7.93854	8.53289	8.83214	8.29349	8.56365	8.85223	8.34689	8.32564	8.87925
ENSDARG00000005789	enpp1	7.3734	8.78981	7.50733	8.41548	8.67766	7.37781	8.87003	9.10179	9.46629	8.77373	9.36272	8.167	8.21544	10.264	9.65763	8.40162	9.76884	9.93361
ENSDARG00000005791	rpl28	12.5901	12.8691	13.2222	12.0344	13.0732	12.6034	12.1375	13.1635	12.8748	12.2878	13.1464	13.6739	11.8888	12.3485	12.8882	13.2192	13.4793	13.3324
ENSDARG00000005799	smim14	5.11219	4.7533	4.11557	5.56696	6.33354	5.52144	5.2732	7.21395	6.90536	6.52858	7.00267	6.88827	5.77472	6.32547	6.24297	5.87662	6.23467	6.95432
ENSDARG00000005800	ampd3a	4.17218	3.94626	3.91909	6.51575	6.57536	5.94998	6.51065	3.90608	6.38745	6.67676	5.87986	5.1306	6.88462	5.96041	4.89347	6.99568	6.17819	5.89614
ENSDARG00000005814	klhl10a	1.95694	2.04453	1.85686	2.4584	2.04201	1.85684	2.05741	1.85664	1.8562	1.8589	1.85793	1.85828	1.93191	1.85627	2.23987	1.85835	1.85645	2.06868
ENSDARG00000005821	ncf2	6.00457	7.24015	6.86824	4.90654	6.13372	4.81228	5.34613	4.12474	5.72566	5.93951	5.60512	5.29035	5.57997	5.56174	5.64268	5.37233	6.08047	6.78785
ENSDARG00000005823	slc39a10	10.5059	9.50617	9.74928	9.70622	9.00564	9.12326	9.21499	9.30843	9.5886	8.90661	9.18426	8.8956	9.42233	9.18985	9.43749	9.23592	9.37801	9.73738
ENSDARG00000005827	eif2s1a	9.91832	9.42228	10.1781	9.01986	9.03597	9.06204	9.35499	9.30637	8.95255	8.33083	8.72489	9.12958	8.65893	9.34257	9.20505	8.97995	9.50643	9.49513
ENSDARG00000005828	faima	5.55728	4.99876	3.94984	4.98142	4.36162	4.75467	4.71408	5.38468	4.9057	6.06272	4.37325	3.97355	5.34557	5.00621	4.00314	5.99891	5.12604	4.44391
ENSDARG00000005834	gatad2b	9.06347	8.61253	8.85157	10.8274	9.56923	9.77949	10.2291	8.3701	9.72036	10.3905	9.2768	8.83605	10.7687	8.96701	9.0418	10.4348	8.64733	9.11107
ENSDARG00000005840	got2b	9.00911	8.80552	7.72789	8.98577	10.122	9.61109	9.40356	9.47655	9.42298	9.11447	9.82365	9.38747	9.26661	9.78378	9.52101	8.9495	9.49774	9.40964
ENSDARG00000005841	tnni2a.2	4.3893	4.63807	4.10848	5.87371	7.22492	6.32297	6.1509	6.60731	8.0825	6.07264	6.22167	5.90512	6.72926	6.85026	7.29603	6.29263	6.72237	5.88883
ENSDARG00000005842	cd9a	5.72316	6.43359	4.2184	5.37787	6.41028	6.57558	5.85058	6.86855	6.69366	6.00416	6.30204	5.42019	7.00541	6.72454	6.2434	7.43118	6.96375	6.18116
ENSDARG00000005846		3.4193	2.58821	2.58684	2.59	3.02761	2.84388	2.99096	3.40959	2.58492	2.59272	3.72978	2.59094	2.83041	2.58515	2.58739	2.59115	2.58566	2.71053
ENSDARG00000005853	slc25a6	2.74559	2.74182	2.74063	3.0441	2.74174	2.74058	3.14833	3.44239	3.08241	3.46987	2.74333	2.74421	3.64592	2.96371	3.04101	3.00959	2.7598	2.74011
ENSDARG00000005861	ralgapa2	10.2144	11.458	11.9103	11.1775	9.62606	10.2636	10.4795	10.8207	10.3823	10.8294	10.8234	10.3875	11.3894	10.6113	10.5922	11.0166	10.2393	10.1432
ENSDARG00000005867	gon4l	10.3458	9.94288	10.4737	10.2932	9.21649	9.81601	9.69929	10.2198	9.49121	9.25883	9.49514	9.06005	10.1563	9.58428	9.53953	9.55818	9.71606	9.19839
ENSDARG00000005870	mmadhc	7.57234	8.29671	5.84337	7.04409	8.02104	7.1804	7.3787	8.80325	8.23365	7.06321	8.07065	7.93318	7.49138	7.51434	7.88993	7.31387	7.88948	7.7058
ENSDARG00000005883	rfx1a	7.73461	7.7834	7.78699	9.38238	7.18416	7.8659	8.44672	7.33721	6.03419	9.50651	7.97304	7.84802	9.53832	7.61034	7.06532	8.705	6.9297	7.14155
ENSDARG00000005891	cyb5r3	7.24385	7.731	7.84476	7.52834	10.1636	10.2037	7.98643	9.84439	9.29123	8.29874	9.9131	10.6726	7.45105	9.64192	10.1991	7.63271	9.76149	9.74308
ENSDARG00000005894	slc7a9	2.80994	2.93591	2.80477	2.80764	3.44174	2.80472	3.17218	3.09559	2.80302	3.82158	2.80759	2.8085	3.05772	3.41279	2.80526	3.14556	3.19524	3.16059
ENSDARG00000005897	dera	5.38307	8.28491	7.96486	6.58817	9.87639	10.0331	6.59743	9.23495	8.68946	5.53785	8.77676	8.94103	6.23164	8.9506	9.08177	6.75621	9.1294	9.23427
ENSDARG00000005908	clk4b	8.39236	8.782	7.54208	8.52337	8.36534	8.09901	8.10357	8.17004	7.78249	8.76142	6.74167	6.10304	8.00326	7.02855	7.22131	8.11758	7.37437	7.1715
ENSDARG00000005913	tgm1l3	2.65484	2.32372	2.3229	2.3248	2.32367	2.32287	2.71635	2.92359	2.32175	2.32644	2.32476	2.32536	2.34437	2.70682	3.01692	2.32549	2.32219	2.90596
ENSDARG00000005915	tcf3a	10.9369	10.9413	10.5642	10.5433	9.34809	10.1355	9.98632	9.60378	9.46626	10.8141	9.39818	9.64001	9.99915	9.85527	9.09096	9.67677	9.6315	9.11203
ENSDARG00000005916	srpk3	7.34224	7.20701	8.21874	8.043	7.75587	7.44736	7.64259	6.30928	8.16728	7.79184	7.91089	7.99232	8.74856	7.15574	8.16441	8.38748	7.51883	6.45449
ENSDARG00000005924	serpina10a	5.79935	6.51797	5.90542	7.55815	8.23156	7.71456	8.26952	8.44236	7.89638	8.46538	8.50465	9.36996	8.02572	8.37415	8.42595	9.05269	8.48681	8.75136
ENSDARG00000005926	ak2	9.26074	9.07948	8.99481	7.76457	8.83957	9.04519	8.70556	8.43075	8.61332	8.40324	9.45823	9.52548	8.06499	8.70994	8.88855	8.88294	8.92907	9.13902
ENSDARG00000005927	tbc1d17	8.04511	7.63913	6.27301	7.60008	8.63548	8.48388	7.97261	7.49691	8.33929	7.83038	8.88116	8.95074	7.85239	8.2178	8.44205	7.21697	7.95625	7.88825
ENSDARG00000005941	clul1	11.143	10.3383	10.8534	10.9313	11.296	11.6002	11.0676	11.378	10.8985	10.7087	10.8768	11.4675	10.7744	11.0636	11.1303	10.6531	11.2683	11.6101
ENSDARG00000005941	yes1	11.143	10.3383	10.8534	10.9313	11.296	11.6002	11.0676	11.378	10.8985	10.7087	10.8768	11.4675	10.7744	11.0636	11.1303	10.6531	11.2683	11.6101
ENSDARG00000005942	v2rl1	0.849199	0.848467	0.848237	1.0827	0.848452	0.848227	1.16684	0.848131	0.847915	1.25241	0.84876	0.848931	0.848116	0.847953	0.848329	0.848966	0.848039	0.848137
ENSDARG00000005943	htra4	3.25221	3.38874	3.23546	3.4322	4.31469	3.23529	4.60177	3.23356	4.68133	4.95235	4.64424	3.24763	4.08681	3.23036	3.2371	3.32491	3.60552	3.84956
ENSDARG00000005945	sart1	9.68459	8.85384	9.10744	9.42304	9.28988	9.38869	9.52477	9.27061	9.7468	8.28833	9.14713	9.28106	9.56622	9.17579	9.47403	9.84729	9.59349	9.69435
ENSDARG00000005948	ankmy2a	7.95466	7.79419	6.90668	7.818	8.01225	8.39248	7.73744	8.35437	7.52817	7.50477	8.0497	8.48783	8.13338	8.02655	7.5247	8.12326	7.76854	7.43245
ENSDARG00000005972	ric8b	7.74038	8.62841	8.50556	8.55583	10.0846	9.92284	8.69719	9.19928	9.89543	9.03647	9.00189	9.64905	8.61905	9.30668	9.81003	8.32021	9.35326	9.67811
ENSDARG00000005980	sfswap	10.2437	9.63652	10.4016	10.7076	10.5824	10.266	10.1878	10.2101	9.78747	10.5183	9.88448	9.85286	10.4119	10.0589	10.018	10.1958	9.81998	9.79103
ENSDARG00000005989	rgl1	10.1514	9.87168	10.1676	9.49023	9.82982	9.73546	9.60537	9.95909	9.69844	10.3009	9.79867	10.0907	9.58134	10.4347	10.3683	9.16279	10.3229	9.98639
ENSDARG00000005993	prc1b	8.05933	9.21959	9.79198	8.03335	6.98443	7.66833	7.92958	7.58089	7.75464	7.2617	7.67995	7.78672	7.51442	6.97515	6.75373	7.38577	6.93884	7.1855
ENSDARG00000006003	mycla	10.5878	10.2831	9.67052	10.4329	9.72741	9.34756	8.62299	9.47107	9.48967	9.01997	8.64684	8.98272	9.66965	8.38952	9.49158	9.90522	9.03855	9.03527
ENSDARG00000006008	dct	7.42209	4.70621	5.28779	5.68161	5.74686	5.06741	4.79202	6.05311	7.41016	5.43855	5.02632	4.66733	6.32507	6.55993	6.07114	6.11763	6.2934	5.59293
ENSDARG00000006010	bmi1a	8.09442	7.57415	3.56922	7.68968	7.37214	6.85234	7.33875	6.15936	5.18175	8.34723	8.00093	7.25785	7.87664	6.4054	7.98193	8.30401	7.32831	7.50475
ENSDARG00000006011	klhl42	5.19553	4.96512	5.10274	5.18063	5.78854	5.57137	5.60776	6.20393	6.1237	4.98335	5.73097	6.46946	5.47937	6.19731	6.33995	5.3777	5.87162	5.77673
ENSDARG00000006019	tktb	11.0386	11.0887	10.6915	9.90616	11.8535	12.068	10.3336	11.4792	11.0155	9.98263	11.6731	11.5413	10.0865	11.982	11.8294	10.3055	11.4735	11.7404
ENSDARG00000006025	tp53i11b	6.50402	5.32061	3.81848	6.82896	7.35691	6.59547	7.27084	7.34224	6.60413	7.49196	7.95029	7.86174	7.76362	6.22931	7.68343	7.75803	7.34581	7.32007
ENSDARG00000006029	lta4h	9.39341	10.4074	9.54977	7.69006	8.42609	8.6586	7.93051	8.84261	9.87274	7.83435	8.82443	8.04476	8.10763	9.72507	8.83865	8.57767	9.42245	9.3918
ENSDARG00000006031	abat	8.28197	8.73755	8.25798	7.92435	7.8612	8.78921	9.35754	9.76501	9.80662	10.2354	11.6964	11.5719	10.2082	11.0287	10.6995	10.8695	10.68	11.1427
ENSDARG00000006038	aebp2	8.9479	8.53633	8.30757	8.91814	9.03967	8.78759	8.45113	9.17435	7.99115	8.1087	7.97585	7.9037	8.798	8.09357	8.34519	9.19109	8.28504	8.81132
ENSDARG00000006040	cyp20a1	8.40355	8.26209	6.56317	7.64908	7.90559	7.61269	7.33498	8.19787	7.95411	8.30494	8.18567	8.51399	7.12681	7.8975	8.48195	8.03649	7.85824	7.6593
ENSDARG00000006044	ust	6.46956	7.00155	6.61888	6.79047	6.87105	6.65767	7.61119	7.34904	7.47505	7.61564	7.14005	6.27232	7.45891	6.80668	6.68997	7.19496	7.13789	7.42839
ENSDARG00000006052	malt2	6.21939	5.84496	5.36991	4.86376	5.85696	4.94831	5.49922	4.1965	6.19478	5.89056	6.61958	6.01727	4.41191	5.24418	6.0742	5.31555	6.48954	6.46954
ENSDARG00000006060	crybg1b	8.11167	5.5602	7.27569	8.16597	6.95269	7.56701	9.17754	8.11452	7.98337	8.87594	8.95048	8.07018	7.81647	7.39287	7.14558	7.5674	7.59639	7.66108
ENSDARG00000006062	akap1b	10.3296	10.0699	9.79453	9.84819	8.55704	8.97343	9.84993	8.56389	9.83068	9.14523	8.95308	9.25412	9.635	9.51896	9.28258	9.28186	9.38062	9.45399
ENSDARG00000006065	znf385b	5.64114	4.80448	5.81889	7.53246	6.50958	6.62465	7.16172	6.9481	6.41249	7.77718	6.59445	5.65891	8.22496	6.73823	5.93191	6.9975	6.75264	6.41249
ENSDARG00000006074	uck2a	8.2068	9.08052	8.73463	8.84977	7.68502	7.7595	8.17617	8.27815	8.00165	8.06688	8.18953	7.53978	8.64792	7.72832	8.47342	7.5257	7.37201	8.04462
ENSDARG00000006079	gpr37l1a	5.09068	5.36568	3.69709	6.52589	4.75983	5.05918	6.02604	3.69141	3.67958	3.74702	3.72404	5.31215	5.89716	4.89823	4.45678	5.01449	4.16719	4.4942
ENSDARG00000006092	rad21a	12.7953	12.3865	12.0973	12.3963	11.5932	11.6564	12.1403	11.9575	12.1092	12.1327	11.4745	11.6413	12.199	11.4743	11.8372	11.8072	11.2699	11.3172
ENSDARG00000006093	cdk15	5.31899	3.15654	5.69787	4.42808	10.1036	9.86061	3.20979	8.91409	9.07982	6.31322	8.19677	9.80713	5.49679	9.17121	9.47248	4.68114	9.19593	8.94072
ENSDARG00000006094	igf2r	9.97793	10.7659	11.1683	10.3464	11.5098	11.5183	9.91715	11.0992	10.7505	10.1362	10.8547	10.9244	10.2341	11.7791	11.1282	9.91313	11.58	11.6495
ENSDARG00000006109	pimr185	0.990089	1.01941	0.988983	1.48018	0.98923	0.988972	0.990252	0.988861	0.988612	0.99013	0.989585	0.989781	1.21298	0.988656	0.989089	0.989821	0.988755	1.31978
ENSDARG00000006110	chrd	5.3488	4.66737	5.09009	5.40841	4.33895	4.35607	5.74851	3.80522	3.79604	4.73964	4.86843	5.18221	5.59574	4.42816	3.81346	6.3973	4.06989	4.37771
ENSDARG00000006112	myof	8.31589	4.96273	3.58471	7.50835	7.11166	5.90532	8.36515	7.14431	8.06481	7.41644	6.59094	7.47521	7.09222	6.73071	5.95673	7.10875	8.19859	6.22044
ENSDARG00000006120	tbx2b	9.0613	8.05923	7.2007	9.25294	8.56768	8.86473	9.99292	8.24671	9.31136	9.70101	7.8869	7.7856	9.56211	8.26342	7.25805	9.42111	8.48909	8.01325
ENSDARG00000006124	kdm5c	12.2694	11.666	11.9012	12.1265	11.7975	12.2885	11.8858	11.1108	10.8786	11.6937	11.5152	11.7205	12.034	11.7482	11.7696	11.6127	11.7173	11.7603
ENSDARG00000006125	csnk1db	9.98165	10.4103	10.8026	10.3468	11.1914	11.4064	10.7345	11.4757	11.4861	10.6869	10.9883	11.6692	10.7334	11.0929	11.2333	11.1419	10.9786	11.6116
ENSDARG00000006128	cep170aa	11.0812	10.0743	10.7959	11.8839	10.5221	10.6892	10.9871	10.846	10.6117	11.1894	10.3912	10.1535	11.7074	10.9214	10.4578	11.2965	10.838	11.0763
ENSDARG00000006137	star	3.16888	2.70389	2.70116	3.32291	2.70371	2.70105	3.99941	2.6999	3.66895	4.19557	2.70732	2.70929	3.07475	2.72393	2.70226	3.12053	2.95703	2.80138
ENSDARG00000006151	pde11al	4.05579	3.72481	4.35431	4.27395	3.72471	4.21848	4.21792	4.06604	4.66182	3.72973	3.72669	3.72779	4.79712	4.30551	4.06756	4.65682	3.85505	3.7227
ENSDARG00000006169	lrrk2	9.23668	9.1627	9.41086	8.75028	9.75674	9.80375	9.24572	8.97336	9.00472	9.54873	9.02582	9.39571	8.80952	9.71068	9.54135	8.04329	9.51954	9.1443
ENSDARG00000006174	lrrc23	3.37595	2.82264	2.82115	2.8246	3.39071	3.16974	3.29726	2.82046	2.81906	3.05836	2.82453	3.9779	2.93698	2.81931	3.50972	2.82585	2.81986	3.5159
ENSDARG00000006181	hif1aa	4.87732	5.31214	4.25052	6.04654	6.43162	6.36842	5.78204	5.02511	6.47626	6.45633	6.19536	5.42035	6.70276	5.82457	5.85149	6.68374	6.8884	5.9751
ENSDARG00000006192	gatad2ab	10.5813	10.7547	10.9783	9.98461	9.86637	9.85986	9.50923	9.42147	9.05101	9.48281	9.84047	9.64378	9.67297	9.92021	9.33982	9.76944	9.84535	9.75207
ENSDARG00000006196	sav1	8.24717	8.36033	8.74314	7.99631	8.93852	8.6345	9.19982	9.23916	8.81854	8.94642	8.8412	9.53869	8.17185	8.97288	8.89229	8.12638	9.06736	8.84395
ENSDARG00000006200	eif4g1a	13.7909	13.9491	14.2331	13.0227	12.6412	13.0813	12.6783	12.5746	12.6756	12.0936	12.48	12.4972	12.6866	13.27	12.8708	12.7256	13.1396	13.3952
ENSDARG00000006202	erbb3a	6.28693	4.58472	5.8073	7.2404	7.55305	7.9354	8.69146	7.23197	8.84981	8.07701	9.55608	7.69717	7.63921	7.13206	6.88166	7.28326	7.26194	6.14855
ENSDARG00000006206	pou4f3	3.56404	3.55463	3.55162	4.29403	3.94074	3.90852	4.06722	4.61178	3.80723	4.61806	4.091	3.56062	4.59844	3.54789	4.45044	4.83583	3.83301	3.99585
ENSDARG00000006207	gpx1b	2.98926	3.25242	2.9817	3.67486	2.9834	2.98162	3.38932	4.17177	3.7408	2.98953	3.03592	3.99443	3.24547	2.97944	2.98243	3.55842	3.38651	3.00766
ENSDARG00000006215	akr1b1	8.38522	7.64119	3.99743	6.90951	14.7325	14.7045	6.6272	13.5521	12.3321	6.41945	13.4232	14.681	6.85677	12.9862	13.9651	7.66127	13.3695	13.4664
ENSDARG00000006219	gnl3	9.72448	9.90607	9.14257	8.19245	9.11491	9.08999	8.81055	9.25569	9.22961	8.1882	7.93659	9.16036	8.60298	9.61123	9.30213	8.69888	9.64069	9.65727
ENSDARG00000006220	ugt1a7	3.46723	3.48945	3.28483	3.3937	4.2842	3.52483	5.75909	6.82293	7.60437	6.93372	6.0741	5.62897	4.71289	7.47468	6.85667	3.62578	6.13116	6.17376
ENSDARG00000006220	ugt1a6	3.46723	3.48945	3.28483	3.3937	4.2842	3.52483	5.75909	6.82293	7.60437	6.93372	6.0741	5.62897	4.71289	7.47468	6.85667	3.62578	6.13116	6.17376
ENSDARG00000006220	ugt1a2	3.46723	3.48945	3.28483	3.3937	4.2842	3.52483	5.75909	6.82293	7.60437	6.93372	6.0741	5.62897	4.71289	7.47468	6.85667	3.62578	6.13116	6.17376
ENSDARG00000006220	ugt1a1	3.46723	3.48945	3.28483	3.3937	4.2842	3.52483	5.75909	6.82293	7.60437	6.93372	6.0741	5.62897	4.71289	7.47468	6.85667	3.62578	6.13116	6.17376
ENSDARG00000006220	ugt1ab	3.46723	3.48945	3.28483	3.3937	4.2842	3.52483	5.75909	6.82293	7.60437	6.93372	6.0741	5.62897	4.71289	7.47468	6.85667	3.62578	6.13116	6.17376
ENSDARG00000006225	ddx39aa	11.2464	10.915	10.5546	10.4298	9.99694	9.85017	9.89532	9.60891	9.9331	9.94446	10.0042	9.59622	9.88186	9.36464	9.56392	9.86544	9.39746	9.79922
ENSDARG00000006235	brms1la	8.92817	8.22602	8.66171	8.93249	8.95216	8.34756	9.12851	8.50997	8.98823	9.36021	9.00392	9.66208	9.14211	8.39776	8.60645	9.06496	8.809	8.76705
ENSDARG00000006240	slc27a1a	8.43268	8.72972	9.06858	7.75744	8.96979	8.14051	8.46551	8.36395	8.34179	8.48188	8.8506	8.13762	8.42409	8.73665	8.70073	8.06948	8.31529	8.34236
ENSDARG00000006242	ptp4a1	10.5366	10.9846	10.7745	11.2364	11.3883	11.4622	10.8935	11.3647	11.2626	11.318	11.4026	11.91	11.5101	10.8338	11.6905	11.6043	11.2323	11.356
ENSDARG00000006251	ell2	9.57888	10.3478	11.4297	9.41868	8.91929	9.04387	8.7993	9.08038	9.12061	8.71685	8.28224	7.69371	8.33937	9.00511	8.48358	8.98063	8.67752	9.02525
ENSDARG00000006253	mier3a	8.45047	8.62649	9.44046	9.0696	8.49279	8.37295	8.38626	8.66762	8.85035	8.75245	8.70148	8.09535	8.99729	7.9611	7.92357	9.30438	8.70114	8.28469
ENSDARG00000006257	vldlr	8.35588	5.94918	6.9866	10.0827	8.66732	8.98298	9.39897	8.20909	8.04806	10.0339	8.95795	8.58626	10.5016	8.37493	7.87992	10.0511	8.46681	8.34875
ENSDARG00000006260	tuba8l4	14.6878	14.6875	14.4866	13.3636	13.2679	13.1672	13.2931	13.7315	13.793	12.9524	13.9522	13.6904	13.0277	13.4327	13.7916	13.7675	13.6827	14.0446
ENSDARG00000006266	stat1a	7.37493	7.22951	8.48115	8.06501	8.26707	8.53996	8.97263	9.14822	9.28691	9.11436	9.60204	9.35152	9.13794	9.419	9.32711	8.96174	9.26553	9.20376
ENSDARG00000006272	mpp5a	10.2877	10.1477	10.3982	9.56456	9.79055	9.57722	9.53441	8.89559	8.80425	9.01149	9.46569	8.57865	9.15938	9.37315	9.2698	9.07642	9.50461	9.32277
ENSDARG00000006279	rragd	4.58784	4.99312	3.51437	4.21007	7.74826	7.48904	5.51775	7.10095	3.42112	5.54701	6.99777	7.33998	5.42297	6.59506	7.12915	4.3958	7.23753	6.84369
ENSDARG00000006283	waslb	8.62988	7.92551	8.39768	7.85446	7.65152	8.09298	8.48537	7.84406	7.69293	8.35994	8.316	6.45626	7.57684	7.68178	6.7766	7.12383	8.06914	7.34116
ENSDARG00000006288	prdm5	7.82988	6.43999	6.90662	7.1856	6.78743	7.42435	7.64202	7.11331	7.85119	8.47545	7.55666	6.44863	8.00971	6.4129	6.65061	8.74426	7.08382	7.25565
ENSDARG00000006290	ndufs5	7.73006	7.8174	6.40573	7.61986	8.3503	8.20632	7.12921	8.80611	8.71487	8.13957	8.72842	8.76568	7.44256	8.13178	8.20584	8.69363	8.3994	8.64387
ENSDARG00000006292	maats1	3.70447	2.99	2.98745	3.9568	2.98984	2.98735	3.22436	4.71275	2.98384	2.99836	3.60115	3.89625	3.07435	3.15235	2.98847	3.41912	3.68617	3.15823
ENSDARG00000006299	arhgef7a	8.67254	7.70523	8.17329	9.49989	7.94913	8.14176	8.84996	7.52756	8.37708	9.26904	8.56168	7.8459	9.54845	7.63184	8.27963	9.42311	7.00219	7.75642
ENSDARG00000006300	psmd9	7.95063	8.53977	8.05772	7.01838	7.79426	7.81016	7.34781	8.33983	8.22364	7.12257	7.46201	7.36271	7.17982	7.74778	7.94254	6.51994	7.51144	7.9174
ENSDARG00000006301	raph1a	9.49347	8.55327	8.19323	10.3681	9.76986	9.8912	10.1062	9.99423	8.93582	10.2322	9.13954	9.93437	10.7659	9.96372	10.301	9.7926	9.64335	9.60632
ENSDARG00000006307	shisa4	7.02624	6.78771	5.9653	7.51581	6.45379	6.5038	7.30398	6.11902	3.8372	7.21187	5.53641	6.1875	8.22143	6.09727	6.47178	7.72243	6.43943	6.5425
ENSDARG00000006308	ptpn18	4.42629	5.12214	4.05209	4.7983	4.45423	4.28663	4.08158	4.97018	6.16475	5.03563	5.2404	5.32677	4.6606	5.91265	5.1034	4.20684	5.79507	5.93933
ENSDARG00000006314	itgav	10.7681	10.1994	10.4857	10.5159	11.5088	11.3498	11.8788	11.2154	11.7406	11.1362	11.4903	11.4539	10.9655	11.4169	11.1677	10.6835	11.3886	11.5758
ENSDARG00000006316	rpl23a	12.3231	12.6909	11.5979	11.6963	12.9443	12.5098	12.0399	12.9574	12.4794	12.4199	13.0516	13.7249	12.0418	12.9725	13.3017	12.8416	13.2959	13.1672
ENSDARG00000006332	snx14	8.96752	9.1157	10.3472	9.20196	10.1279	10.0168	9.18558	9.73975	10.4879	9.17323	10.0889	10.6064	9.34362	9.87962	9.8574	9.35333	9.82585	10.2943
ENSDARG00000006341	tas1r3	0.117146	-6.48e-05	-0.000148654	4.58e-05	-7.03e-05	0.134853	0.0446813	-0.000187143	-0.000265531	0.000215374	0.116401	0.000104412	-0.000192362	-0.000251588	-0.000115157	0.00011717	-0.000220533	0.0160314
ENSDARG00000006345	med17	8.57264	8.03221	8.14036	8.40652	7.03298	7.55588	7.38409	7.68146	7.39436	8.61472	7.76686	7.25035	8.00482	7.59754	7.46959	8.18609	7.38029	7.33891
ENSDARG00000006350	nkx1.2la	-0.118287	-0.211442	-0.211541	-0.211311	-0.211448	-0.211545	-0.208583	-0.211587	-0.21168	-0.210014	-0.211315	-0.211241	0.126608	-0.211664	-0.211502	-0.211226	-0.211627	-0.211585
ENSDARG00000006353	itga5	10.3484	11.391	11.1631	9.78788	10.5146	10.8915	10.1765	10.2996	10.2405	10.2572	9.66645	9.37475	9.79128	9.95998	9.76483	9.60646	9.91841	9.33408
ENSDARG00000006356	slc18a3a	3.63383	4.33027	3.46658	4.80587	4.17059	3.93681	3.48487	4.54864	4.76501	3.48315	3.47536	3.47819	5.10724	3.9419	3.46814	4.58954	3.78749	3.76668
ENSDARG00000006368	crlf1b	6.8987	7.26678	7.77601	6.59392	6.38129	6.77331	7.94392	6.42374	4.91586	6.99613	6.51831	6.15988	6.82543	5.12199	6.30586	7.47247	6.51539	6.58586
ENSDARG00000006370	atp6v1h	7.60918	8.17019	8.15546	8.09011	9.83336	9.61288	8.17019	10.0385	9.48681	8.4259	9.89469	9.66343	8.93739	9.58519	9.72244	8.90098	9.61908	9.69777
ENSDARG00000006372	ugt5c2	-1.03917	-1.04477	-1.0451	-1.04208	-1.04492	-1.0451	-1.03836	-1.04512	-1.04514	-1.03897	-1.04216	-1.04089	-1.03177	-1.04514	-0.91506	-1.04065	-1.04513	-1.04511
ENSDARG00000006383	stxbp5l	5.40897	3.56647	5.44757	7.65188	5.6955	6.52001	7.04492	7.47482	6.2914	7.47982	5.62679	6.00139	8.74178	5.3721	6.5521	8.45555	5.86177	6.31525
ENSDARG00000006385	triobpb	8.29168	8.43032	8.04376	7.89447	8.57867	8.80935	7.8304	9.57964	8.75645	8.30947	9.31081	9.39643	7.86047	9.14938	9.46183	7.80995	8.95927	9.36678
ENSDARG00000006389	smad2	9.30573	9.23452	9.60989	9.55031	9.11187	8.76112	9.56965	9.48453	8.83903	9.40141	8.83491	9.25374	9.48913	9.29489	9.09055	9.10318	9.22122	9.38984
ENSDARG00000006392	exosc9	8.03892	8.62816	8.80194	7.26624	7.1004	7.25148	7.33119	8.28709	5.24357	7.46519	7.38006	7.92534	7.42468	7.30296	7.6925	7.50759	7.65327	7.41037
ENSDARG00000006395	rbm25b	10.5771	9.87453	10.4458	10.4979	9.92484	9.99096	9.84711	9.89607	9.83908	10.0224	9.6712	9.63173	10.3585	9.83235	9.2476	10.6795	10.0446	10.2932
ENSDARG00000006396	nrcama	8.15716	2.77709	2.53623	10.5835	8.36988	8.09452	9.42178	7.6868	8.55986	9.34773	8.64352	7.95545	10.7723	7.99351	8.32278	10.4227	6.99191	7.25658
ENSDARG00000006397	laptm4a	8.49755	8.42265	8.93797	8.82331	9.82287	9.73137	9.50884	9.81479	9.3824	9.37506	10.0406	10.5378	9.28129	9.60954	9.76962	9.37984	9.54394	10.0697
ENSDARG00000006399	ywhae1	11.9294	11.7463	11.259	11.8578	12.4554	12.1216	11.5112	12.1065	11.9167	11.7064	12.18	12.1546	11.6573	11.8839	12.025	12.0508	12.0494	12.2769
ENSDARG00000006408	hmgb3b	9.05905	8.25537	9.55629	8.70616	8.78724	8.82671	8.30779	9.86086	10.2679	8.36719	9.71579	9.59026	8.78205	9.09208	9.97564	9.26618	9.67802	10.0605
ENSDARG00000006409	mapk12b	8.16926	8.2853	6.84517	6.38077	6.48875	5.24116	5.58562	7.24119	7.06273	5.993	6.99393	6.24099	5.91146	5.16581	6.11235	6.4658	6.50073	6.77791
ENSDARG00000006413	rpl38	8.41767	8.66532	7.73133	8.06047	8.88537	8.36451	8.6211	9.38652	7.72278	9.41074	9.17022	9.50435	8.85645	9.55336	9.30156	9.22114	9.14034	8.75924
ENSDARG00000006420	atrnl1b	10.5611	10.1573	10.2347	11.1378	9.50359	9.87983	10.6625	9.38923	9.27194	10.6229	9.1659	9.0869	11.2613	9.40515	9.48352	11.1277	9.59938	9.11276
ENSDARG00000006422	esyt3	7.0644	5.71588	4.11144	6.57862	6.50103	5.63906	7.47756	6.00713	6.971	5.15567	7.30169	6.9059	5.78143	5.91689	5.7527	5.84706	5.80744	6.04289
ENSDARG00000006427	fabp2	5.29688	3.9044	5.8963	5.59371	6.92255	6.31848	6.37034	6.99815	8.26586	6.74927	7.21137	6.92328	6.05838	7.87393	7.62025	5.84275	7.17217	6.76386
ENSDARG00000006434	polr1e	7.87847	8.70235	7.93948	6.75869	7.59034	6.71965	7.34359	6.97162	5.99483	6.7979	7.26502	7.30468	6.74577	7.17248	7.25878	6.66674	6.93052	7.50746
ENSDARG00000006447	slc19a3a	3.16146	4.21762	3.15466	3.5233	3.76537	3.1546	3.28505	3.15391	3.83691	3.5872	3.74865	3.15958	3.47531	3.29722	3.15532	3.73929	3.48471	3.58744
ENSDARG00000006456	pdgfrl	6.6122	5.1608	5.87577	8.64476	8.47824	8.33873	9.19563	7.90459	7.77808	9.42677	6.69975	6.37478	8.56685	7.14033	7.81328	8.87162	7.23919	6.29509
ENSDARG00000006467	pcdh8	8.32859	4.76112	4.98493	8.2075	6.39765	6.09928	6.95925	5.65926	7.39302	8.23051	6.83356	6.49465	7.91757	3.25779	5.69016	7.86924	5.25322	5.35285
ENSDARG00000006468	grap2a	4.45342	6.58654	7.6833	4.90184	5.35212	5.97592	5.02651	7.14679	7.62574	6.22645	7.69365	6.45521	5.83072	7.35192	7.63996	5.48664	7.79052	8.11707
ENSDARG00000006474	saxo2	2.78368	2.66193	2.66069	3.35731	2.66185	3.05216	3.32921	2.66012	2.65895	3.41362	2.6635	2.66441	3.1214	2.65916	2.66119	2.6646	3.56058	2.83794
ENSDARG00000006477	ddi2	10.6424	10.3856	11.0078	10.2084	10.1692	10.3075	9.81761	10.2412	10.171	9.4199	9.63367	10.0566	9.86335	10.1225	9.95937	10.0091	9.98999	10.387
ENSDARG00000006487	anp32a	12.2914	12.3636	12.7435	11.8282	11.6848	11.481	11.6298	12.0204	12.0105	11.5765	11.942	12.384	11.6787	11.1064	11.4824	12.3837	11.5351	11.8439
ENSDARG00000006491	agpat9l	4.23653	4.4313	4.13815	4.4276	4.44869	4.64631	4.91538	4.15495	5.5405	4.99998	5.49608	4.52134	4.40796	4.61065	4.79991	4.14464	5.30608	4.98116
ENSDARG00000006494	asb7	9.05824	8.74596	9.13525	8.9983	8.06449	7.97573	8.62748	8.32814	7.88765	8.55017	8.03345	7.30698	8.4666	8.15609	7.17828	8.37665	7.79232	7.00805
ENSDARG00000006497	rtn1a	9.89954	8.43686	8.46774	12.0545	10.8722	10.525	11.1019	10.4016	10.7194	11.6503	10.9037	10.754	12.4821	10.3632	10.621	12.2367	10.3612	10.5876
ENSDARG00000006501	cyp2x10.2	1.84548	1.84306	1.8423	1.84407	1.84301	1.84226	1.84594	2.8172	1.84122	1.84559	1.84403	1.84459	1.89103	2.41096	2.52042	1.84471	1.84164	2.02674
ENSDARG00000006508	pip5k1bb	7.53776	9.16504	9.9702	7.81186	9.0773	9.86606	6.57651	8.99523	8.80121	7.79278	8.23418	7.96912	7.3084	8.17091	8.5149	7.31083	8.05227	8.10157
ENSDARG00000006514	her6	9.22132	8.99411	10.8142	9.67082	10.6201	8.72454	9.14065	8.31393	8.2409	9.15103	8.84131	7.61604	9.22761	8.44391	8.3759	9.30574	8.85697	7.42793
ENSDARG00000006522	otop2	2.92207	2.6853	2.68387	3.19698	3.12089	2.68381	2.69067	2.68321	3.73064	3.76338	2.68711	2.68816	3.29677	2.6821	2.68444	2.97906	2.78911	2.87148
ENSDARG00000006524	supt6h	12.1299	11.435	11.6836	11.6199	11.0451	11.5562	11.3572	11.1148	10.7905	11.4345	10.8213	11.419	11.5736	11.2766	11.0906	11.1938	11.3169	11.6179
ENSDARG00000006526	fn1b	11.1256	8.35204	8.9856	9.60154	11.8136	12.4319	12.4841	11.2665	11.6821	12.8835	12.166	11.7873	11.694	12.6822	11.7361	11.0832	12.0093	11.2464
ENSDARG00000006527	brd3a	11.3099	10.4566	10.4279	10.6201	9.43503	9.79561	10.3671	9.44512	8.96136	10.3355	9.77441	9.3154	10.3412	9.57473	9.06124	10.3791	9.16259	9.41738
ENSDARG00000006544	c1qtnf6b	2.23543	2.23345	2.23282	2.47219	2.23341	2.2328	2.39054	2.23253	2.23194	2.64513	2.23424	2.55858	2.57988	2.23205	2.47953	2.81986	2.47218	2.23255
ENSDARG00000006545	rgp1	7.56474	7.5163	7.13645	7.68091	8.55742	8.85589	7.60873	8.07463	8.75935	7.34477	8.09218	8.95227	7.7327	7.84407	8.44709	7.79499	7.93099	8.52008
ENSDARG00000006546	ak4	7.36701	7.80314	7.346	6.6459	9.1981	9.13132	7.9324	8.67482	8.53037	8.26061	9.57356	9.77191	7.63528	8.94178	9.74207	8.16844	8.81522	9.17449
ENSDARG00000006553	rras	9.16509	8.97879	8.71092	8.16315	9.57524	9.6802	9.63481	9.62163	9.48482	8.7957	9.68165	9.98552	8.40406	9.31955	9.16769	8.04499	9.38759	9.39634
ENSDARG00000006560	irf4a	2.42081	2.41627	2.41483	2.87552	2.81123	2.41477	2.49812	2.41417	2.4128	3.80153	2.4181	2.41915	3.27264	2.96081	2.41541	2.81669	2.41359	2.41421
ENSDARG00000006566	nlk1	10.383	9.64425	9.34894	10.5348	9.82969	9.6767	9.44093	9.21403	9.3945	10.0788	9.12007	9.35516	10.3018	9.22037	9.06198	9.95455	8.70306	9.01102
ENSDARG00000006567	dus4l	4.73018	5.45972	3.92417	4.36173	4.5602	4.83782	4.54597	4.09621	5.23762	5.21405	4.97031	3.93945	4.33545	4.87455	5.62204	4.07065	4.88521	4.40235
ENSDARG00000006568	kcnmb2	1.67798	1.67637	1.67587	2.17419	1.67634	1.67585	1.67829	1.67563	2.35647	1.67806	1.67702	1.67739	1.6756	2.03484	1.67607	1.67747	2.02461	1.67565
ENSDARG00000006577	nadka	5.69235	6.30434	6.70769	6.08529	6.09571	5.94196	5.84615	6.0843	6.77036	5.73956	7.15507	6.84872	5.61793	6.38337	6.19135	5.87059	6.61499	6.76104
ENSDARG00000006580	cldnd	-1.34326	-1.34709	-1.34869	-1.34525	-1.3472	-1.34869	-1.34271	-1.3487	-1.34871	-1.34312	-1.34531	-1.34444	-1.3487	-1.34871	-1.34812	-1.34428	-1.26488	-1.3487
ENSDARG00000006584	phf8	10.7361	9.51304	10.4151	10.8592	9.80593	10.1198	10.3318	9.98205	9.71165	10.4885	9.74067	9.72169	10.6758	9.56781	9.885	10.4076	9.76369	9.75238
ENSDARG00000006585	zmp:0000000529	8.06916	7.777	6.87089	8.2961	7.64913	7.64847	7.76275	7.21247	8.10073	7.06372	6.16492	6.63994	8.25587	7.38524	7.43279	7.99892	7.54592	7.62285
ENSDARG00000006588	zgc:111983	2.76968	2.53531	2.43604	2.64419	2.52932	4.7885	6.72834	5.32562	6.23019	5.30696	9.28499	7.92834	4.40747	4.08653	4.96242	2.70478	5.23042	5.77122
ENSDARG00000006598	sgk2b	5.19298	5.89448	3.38272	5.12224	7.21414	5.62978	5.94949	7.64024	7.74824	5.8913	7.56626	7.33886	5.2437	8.26315	7.93344	5.9254	8.4222	8.31945
ENSDARG00000006600	lsm14aa	10.0044	10.1093	9.52434	9.55626	9.36224	9.23683	9.59295	9.50636	9.37144	9.82141	9.12105	9.36555	9.44928	9.46411	9.46419	8.6841	9.17163	9.48337
ENSDARG00000006601	kaznb	7.71654	6.45324	7.78305	8.3735	8.88237	9.0226	8.4204	8.84447	8.22624	7.61008	8.5007	9.37204	8.69744	9.33405	9.50189	8.65292	8.80682	9.20687
ENSDARG00000006602	chrna2a	2.74467	2.26133	2.2605	2.59093	2.26128	2.48949	2.26448	2.26012	2.25933	3.14885	2.26239	2.6237	2.81081	2.25947	2.26083	2.26313	2.25978	2.3899
ENSDARG00000006603	csrp1a	8.07774	8.23092	7.26128	7.05995	6.5825	6.50484	7.90614	7.02211	6.71899	8.44121	7.29686	5.81896	6.76081	6.73478	6.94599	7.03441	7.6081	6.81247
ENSDARG00000006604	nectin3b	7.49979	7.21448	6.18774	6.86952	6.99996	6.6714	7.02524	6.17827	4.07536	7.39786	6.91789	6.10051	7.16062	6.22508	6.34079	6.61179	6.34158	5.3092
ENSDARG00000006607	gpr27	5.07666	4.79046	3.86568	6.08069	4.94922	4.8553	6.18654	4.29248	5.54188	6.40535	5.57576	3.90973	7.00966	4.87026	4.76008	6.62878	3.98573	5.04973
ENSDARG00000006609	map2k2a	8.52608	8.61946	9.11332	8.42278	8.87464	8.70949	8.73535	7.36876	9.06758	8.27045	8.56461	8.45089	8.03524	8.7363	8.2562	8.03198	8.66574	8.85443
ENSDARG00000006615	hnf1ba	7.26943	5.75606	3.4384	7.43451	6.61857	5.83794	6.95546	7.99033	8.84349	7.89485	7.9348	7.02112	6.3279	8.55326	7.92708	6.1328	8.18718	7.28365
ENSDARG00000006617	napga	8.56204	8.93662	9.2877	8.50428	9.09977	9.23996	8.75243	8.87615	8.00938	8.80421	8.43755	8.84669	8.40643	9.16799	8.60884	8.16972	8.94702	8.85762
ENSDARG00000006621	pspc1	9.13866	7.30194	7.95958	9.17061	8.04517	8.08789	8.6112	8.25135	7.33162	9.15681	8.52275	7.23162	9.03527	7.90188	7.98386	8.97572	7.98172	7.92412
ENSDARG00000006624	ppp2r2ab	10.6305	9.91474	10.6038	10.155	9.79494	9.95041	9.52304	9.81597	9.56633	9.47566	9.55169	9.54398	9.74456	9.61767	9.77736	9.68088	9.32196	9.66033
ENSDARG00000006636	slitrk2	4.73934	3.69003	3.67354	5.82423	4.16643	4.31234	6.53645	5.19599	3.64968	6.42198	4.50887	4.41151	6.85457	5.74474	5.05673	6.71066	4.56344	4.14516
ENSDARG00000006639	lnpk	7.58366	7.72547	6.84655	7.62748	6.85672	7.80008	7.46678	8.08856	7.99936	7.37981	7.85305	7.57912	7.47786	7.24276	7.6938	7.51914	7.44505	7.02856
ENSDARG00000006640	eomesa	6.64166	3.56861	3.50598	7.51573	5.92898	5.93359	7.59192	6.36414	6.54119	6.45281	5.99487	3.67728	7.87072	6.46799	4.78515	8.1255	5.09168	5.87363
ENSDARG00000006642	drg2	8.06394	8.6054	7.44564	7.69834	7.5276	7.70616	7.9297	7.06936	7.53102	8.12851	7.86871	7.8717	7.11859	7.4881	7.74097	7.73396	7.98214	8.22034
ENSDARG00000006666	si:dkeyp-69c1.6	7.92802	7.89291	7.45351	7.8646	7.00251	7.6333	7.90692	7.46639	7.24503	6.89984	6.71383	7.11696	7.39987	7.14086	6.78735	7.74133	7.22715	7.02211
ENSDARG00000006672	fam49a	7.81741	7.83322	8.5156	8.60344	9.31447	8.1911	8.82233	9.03142	8.75061	8.68705	8.91685	8.80025	8.14305	8.04053	9.15234	8.27048	8.56176	8.73152
ENSDARG00000006677	ripk1l	7.95262	7.48735	8.42921	7.26668	8.42087	8.88093	7.79567	6.88513	7.36538	7.95106	7.4604	8.05357	7.05938	8.75032	8.80621	7.03561	8.5919	9.14651
ENSDARG00000006678	pth2r	1.9303	1.92856	1.92801	2.17599	1.95939	1.92798	1.93064	1.92775	1.92724	2.41801	2.51458	2.09658	2.38647	1.92733	1.92823	2.10021	1.92753	1.92777
ENSDARG00000006683	arhgef6	8.87874	9.03357	9.43603	8.68675	9.02916	8.70288	9.55805	9.65974	8.97221	9.37401	9.71258	9.72405	8.87462	9.75465	9.26779	8.37605	9.91247	10.0296
ENSDARG00000006691	rpl12	12.5699	12.909	12.6928	12.1831	13.481	13.2039	11.674	13.7546	12.9801	12.1712	13.6077	14.5192	12.0843	13.06	13.7901	12.7505	13.7385	13.395
ENSDARG00000006712	wipf2b	8.25728	6.41397	5.75015	7.48966	6.51373	6.74388	7.24106	6.17115	7.0472	7.66509	6.30335	6.47691	7.59254	6.60091	7.04893	7.63188	7.29742	6.92906
ENSDARG00000006719	specc1la	9.76579	10.4616	10.8046	9.73353	9.65324	9.6252	9.68028	10.0058	9.86344	9.7121	9.59293	9.43419	9.68976	9.70599	9.98199	9.64271	9.81823	9.54976
ENSDARG00000006747	tmem178b	6.2896	6.18835	6.71636	9.50078	6.85073	7.76207	8.38631	3.32094	8.21573	9.30622	6.71009	6.23958	9.90063	7.0541	6.09408	9.22405	6.98524	6.86952
ENSDARG00000006754	mllt3	9.40447	11.0042	11.4013	8.51366	6.98014	6.65752	8.789	7.16301	6.97815	7.65713	6.88453	3.01165	8.06813	6.51289	7.5273	8.44695	6.43491	5.41145
ENSDARG00000006757	klhl41b	8.57185	6.19909	4.75287	7.09753	6.52485	6.88586	8.06586	7.3986	8.91089	6.35196	6.69552	6.71489	7.97805	7.64139	7.43514	8.19695	7.50357	7.27515
ENSDARG00000006758	fam234b	7.92596	6.93575	7.0189	8.003	6.7515	7.21551	6.67711	6.63718	6.58112	8.04064	5.87827	6.92708	8.37101	7.43844	5.70487	7.70707	6.61101	6.36327
ENSDARG00000006760	slc24a3	5.01485	5.56855	4.55915	6.0727	5.80479	4.97347	6.2391	6.58747	5.7586	6.75793	6.72233	5.03493	7.33971	6.88721	6.04307	6.92941	7.18328	6.78728
ENSDARG00000006766	snd1	12.5905	12.2563	12.0035	11.7701	11.9745	12.1701	12.0386	11.9685	11.9608	12.0106	12.2561	12.0042	11.7469	12.3823	12.3895	12.1105	12.1246	12.1291
ENSDARG00000006773	elovl4a	7.76121	6.87157	7.45769	9.67296	7.25466	7.33186	7.46371	6.79495	7.38109	8.78418	6.74649	6.7177	9.43023	6.22447	6.34582	8.59922	5.80095	7.54931
ENSDARG00000006775	cass4	6.23244	5.69022	6.40195	5.17539	5.05962	4.16023	6.19653	4.09294	5.5124	5.19305	5.38952	4.14951	5.7264	6.37547	5.47813	5.97218	6.49613	6.71663
ENSDARG00000006782	rb1	10.7398	10.5201	10.8283	9.25521	9.02215	9.36813	9.63487	9.76304	9.00075	8.45073	9.22738	9.1442	9.15278	9.39973	9.15346	8.78922	9.67197	9.64632
ENSDARG00000006786	copz2	6.97385	6.47224	6.0035	7.54622	7.20845	6.9936	8.21979	8.12642	7.78788	8.24866	7.65443	6.21445	7.44836	7.93637	7.47191	7.81782	6.92484	6.55459
ENSDARG00000006791	arntl1a	8.09833	8.13401	7.99338	8.14519	8.73279	8.57513	8.29596	8.28309	8.41204	8.80641	8.5993	8.11606	8.76882	8.42997	8.82208	9.49747	7.98095	8.52821
ENSDARG00000006797	nt5dc1	7.54261	5.97537	7.60645	7.93546	8.50007	8.48663	7.41362	8.43662	4.0738	7.53192	7.80633	8.55371	8.95552	8.35412	7.84721	7.8299	7.98795	7.7164
ENSDARG00000006811	sult1st6	3.42362	3.41167	3.40782	3.41667	3.50443	3.40767	4.99656	3.40604	4.64489	4.62808	4.5711	3.41928	3.78901	4.40179	4.48246	4.3407	3.53823	4.13465
ENSDARG00000006812	wdr26b	10.0403	10.3522	9.88525	10.2368	10.9095	10.6592	10.5879	10.7262	10.1858	10.6042	10.7331	10.9158	10.602	10.4406	10.5872	10.2883	10.4455	10.4252
ENSDARG00000006816	gtf2f2b	0.112941	0.11241	0.112241	0.11263	0.112399	0.112234	0.113044	0.112164	0.112006	0.112967	0.112623	0.112747	0.112153	0.112034	0.691932	0.112772	0.112096	0.112168
ENSDARG00000006818	urod	11.3315	13.6996	13.5105	8.53045	8.72869	8.76772	7.6707	7.30343	7.68594	7.47943	7.75399	6.45075	6.47527	7.62744	7.82763	6.79722	8.18878	7.98582
ENSDARG00000006832	galnt9	3.31366	3.10175	3.0157	7.84308	5.09025	6.18868	6.37005	5.97462	5.92511	7.42649	5.12479	4.78652	8.43275	6.13133	3.23923	8.301	4.61439	5.68745
ENSDARG00000006837	mycn	11.271	10.2168	10.9013	9.87557	9.47079	9.41107	9.80043	9.46822	9.73752	10.1525	10.0056	9.47107	9.93683	8.48702	8.64167	10.4208	9.14033	9.40155
ENSDARG00000006838	eef1a2	0.230795	0.23041	0.230289	0.23057	0.230402	0.473611	0.23087	0.230234	0.230121	0.230814	0.230564	0.230654	0.328956	0.446267	0.230338	0.230672	0.230186	0.230237
ENSDARG00000006840	gnmt	6.45841	5.40367	6.3879	5.99552	9.55333	9.60431	6.49331	9.33713	8.24391	7.26699	9.74941	9.97061	6.68616	9.45871	9.27981	6.89554	9.08974	9.18381
ENSDARG00000006848	parp9	5.37234	5.18951	5.67286	5.16708	5.18033	5.56137	5.85579	6.48046	4.16895	5.15793	5.08919	5.28602	4.53575	5.71335	4.7851	4.64476	5.21254	5.24747
ENSDARG00000006849	asic2	3.64593	3.62528	4.81593	4.61739	4.45765	4.772	4.13115	4.22377	3.60893	5.02974	3.63368	3.92796	6.03093	4.44988	5.09925	5.16684	4.00183	3.6156
ENSDARG00000006859	nkain1	7.99872	6.86901	5.574	8.12659	7.63407	7.60223	7.49131	6.97131	6.14048	7.22736	6.36368	6.46524	8.37009	6.80869	6.70009	7.53512	6.5488	7.28742
ENSDARG00000006862	kifap3b	7.84906	7.99783	8.4134	9.60919	8.89412	9.00825	9.15145	9.17395	9.27784	9.83428	8.86492	8.80689	10.1514	8.60596	9.21203	9.79458	8.86579	8.61679
ENSDARG00000006863	si:ch1073-349o24.2	4.37095	4.35591	3.49853	4.1572	3.97629	4.00728	3.70055	3.49739	3.98158	3.92254	3.50411	4.30275	4.13079	3.49547	3.96785	4.74062	3.74528	3.52347
ENSDARG00000006865	glra4a	4.45545	3.68073	3.67468	4.80492	4.71903	4.15352	4.60987	3.67186	5.58379	4.42587	3.68829	3.69263	5.15379	4.65168	4.93306	5.60667	4.03615	3.84581
ENSDARG00000006868	trh	3.19511	2.73235	2.73132	2.73371	3.02614	2.78016	2.90141	3.54638	2.72988	2.73577	2.73366	2.73442	3.12665	3.066	2.73173	3.20226	3.25084	3.10958
ENSDARG00000006869	stx17	5.58876	5.33963	4.28108	5.3432	4.8583	5.69321	5.80106	6.66626	6.00828	6.26531	6.19943	6.51083	5.31984	5.8595	5.80793	4.76763	5.96699	6.08744
ENSDARG00000006877	enpp4	4.92678	6.34654	5.56443	4.89581	5.13561	4.94824	4.90839	5.61253	5.49929	5.58471	6.31585	5.52655	5.74615	5.64038	5.45484	5.79178	5.83149	6.16138
ENSDARG00000006878	phf21aa	9.70888	7.12921	8.49779	10.0634	8.22232	8.71657	9.4819	7.34508	8.03034	9.75577	7.34819	6.94991	10.1059	7.39198	7.26171	9.55389	7.36829	7.44978
ENSDARG00000006889	mpped2a	7.10536	7.02151	6.99613	8.09452	7.81781	7.95267	7.93688	7.37396	6.18989	8.43717	7.25697	6.26582	8.11441	7.43389	6.44441	7.21319	6.8998	6.7838
ENSDARG00000006891	kcns3a	2.92022	2.91224	2.90968	3.67395	2.91207	3.23887	2.92173	2.94058	2.90608	3.13973	3.13202	3.38272	4.31033	3.43103	3.21942	4.57194	2.90747	3.50421
ENSDARG00000006892	myo3b	5.06477	4.59438	4.76341	4.83368	4.34407	4.71107	5.64193	4.08818	4.79548	4.67992	4.82965	5.05434	5.42946	4.25375	4.5163	5.53335	5.10034	4.96775
ENSDARG00000006894	oprk1	2.26549	2.26256	2.26163	2.63679	2.2625	2.26159	2.33166	2.2612	2.26033	2.77245	2.26374	2.57084	3.30676	2.26048	2.262	2.74314	2.61275	2.26123
ENSDARG00000006896	lhx6	5.26262	6.66139	3.32717	7.47608	3.72138	5.01529	8.0966	3.28856	7.40186	7.89529	5.10491	5.83204	7.81839	6.51023	5.73972	7.43425	4.72503	6.12925
ENSDARG00000006899	far1	7.84838	8.03681	6.21349	8.13644	10.3324	10.5154	8.60345	9.71086	9.35717	7.6281	9.3292	9.60772	7.737	9.2375	9.3341	8.31519	9.33214	9.34161
ENSDARG00000006900	impdh2	8.77357	9.5077	9.85684	8.83775	8.04603	7.64297	8.12961	8.74484	8.87021	8.84652	8.11677	7.72586	8.92577	8.17014	8.24563	8.73	8.59419	8.31063
ENSDARG00000006901	si:ch1073-459j12.1	7.56095	4.59197	4.9142	10.4849	8.79716	8.70678	10.6995	8.9221	9.26494	10.7799	9.0004	8.75495	10.1597	8.28665	7.93107	10.7068	8.71759	7.54918
ENSDARG00000006911	wnt8b	4.23351	3.60035	3.18374	3.92222	3.36938	3.18365	3.9149	3.18268	3.1805	3.85418	3.18894	3.19062	4.15309	3.44252	3.18466	4.46602	3.39328	3.50373
ENSDARG00000006915	arl8ba	7.41988	8.46766	9.06753	8.15514	8.86349	8.95846	7.42562	8.87767	9.35141	7.5156	9.77396	9.18679	7.74525	8.95598	9.39999	8.13862	9.17742	9.55974
ENSDARG00000006921	lrp5	11.5822	11.198	10.9988	11.0087	10.5694	10.6629	11.4318	9.79601	10.8006	11.7553	10.0225	9.9207	10.9878	10.7022	9.37647	11.2038	10.4782	9.84747
ENSDARG00000006923	cacna1ab	6.73019	2.74692	2.57244	8.37006	5.34264	6.51994	6.70798	5.50903	2.4456	8.67751	7.06146	6.7629	9.90411	7.67111	5.62905	9.60497	6.30205	6.59751
ENSDARG00000006924	fbxo38	8.53196	8.7486	8.99701	8.82844	8.68586	8.79213	8.74502	8.24492	8.73953	8.59827	8.83614	8.72296	8.74959	8.37193	9.20429	8.75669	8.3599	8.74987
ENSDARG00000006939	tbx16l	7.46231	9.09341	9.65007	7.18164	5.0621	4.52764	5.33215	1.93938	1.40186	2.23637	2.03873	2.11691	5.20257	1.44855	5.16791	2.13182	3.61834	2.85801
ENSDARG00000006944	gdpd3b	2.9929	3.31917	3.45435	3.16782	2.98295	2.97989	3.30702	2.97856	4.89064	3.60049	2.98709	2.98936	3.4919	2.97611	3.64864	3.88515	3.06404	4.36835
ENSDARG00000006963	cse1l	10.321	10.194	10.1735	10.0414	9.88228	9.9965	10.1231	9.96165	10.4314	8.84882	9.37905	9.83038	9.62395	9.39586	9.96489	10.1418	9.86815	10.0115
ENSDARG00000006978	zak	5.12395	5.99773	6.69905	5.93172	6.43222	7.18835	6.47799	6.04134	6.50899	6.8556	6.58907	6.95029	5.41507	6.85335	6.84551	6.28218	6.71401	6.75953
ENSDARG00000006981	ccdc113	3.71186	3.22207	3.22005	3.55011	3.79603	3.38077	4.1095	3.21912	3.21721	3.22874	4.14262	3.77508	4.07483	3.21755	4.22527	3.22642	3.79693	3.34073
ENSDARG00000006983	celf3b	7.53537	3.6943	2.93488	9.16995	7.81633	7.3349	8.22526	8.09017	2.62964	8.52105	5.82329	7.46889	9.17963	7.10329	7.05526	8.71228	6.67477	7.23436
ENSDARG00000006990	creld1b	6.03349	3.88551	4.7003	6.8927	6.52744	5.59122	6.55996	3.98448	3.82151	6.41346	4.59681	6.06748	6.96916	5.95743	3.87027	6.21827	5.62683	5.99099
ENSDARG00000007009	hoxa11b	5.08601	6.25132	6.01576	5.9248	4.00482	5.09192	5.9752	4.43459	6.904	6.11946	3.87275	5.80736	5.08892	3.8171	3.84377	5.39205	4.60563	4.52233
ENSDARG00000007018	ms4a17a.6	2.46607	2.89475	2.4623	2.54801	2.46314	2.46226	2.52735	2.46188	2.46103	2.52366	2.7828	2.46502	2.52575	2.50976	3.13185	2.6842	3.07793	3.20464
ENSDARG00000007024	uox	2.88403	2.51391	2.34532	4.03576	3.01921	4.23517	6.54989	8.3931	8.52386	4.33153	7.38136	6.41364	4.07932	9.64066	8.92781	4.80098	8.13237	7.77121
ENSDARG00000007025	ttc9c	4.2191	4.66108	5.88664	4.35651	5.32704	5.21069	4.16197	6.00837	3.93971	4.22396	5.17936	4.99286	4.69232	5.01824	5.32786	4.65356	4.78641	4.3093
ENSDARG00000007034	hnrpkl	10.9042	10.502	10.0514	10.751	10.2426	10.3038	10.5093	10.6665	10.7938	10.7781	10.19	10.2764	11.0252	10.372	9.77829	10.7768	10.0917	10.3489
ENSDARG00000007040	tmigd1	0.511761	0.736083	0.511047	0.511443	0.511206	0.51104	0.511866	0.510968	0.510808	0.511787	0.511435	0.511562	0.510957	0.61699	0.511115	0.511588	0.5109	0.911341
ENSDARG00000007045	cnot4a	9.08543	8.01147	9.17431	8.68807	8.12556	8.9056	8.37279	8.32156	7.24815	8.59984	8.96696	7.9224	8.79387	8.52172	7.83387	8.63667	8.22276	8.45735
ENSDARG00000007065	mrps18b	6.10471	7.19083	6.8915	6.53123	7.02608	6.29587	7.12357	7.08057	6.17939	6.24543	6.13199	6.96615	6.41048	7.03668	6.76988	5.82397	6.76652	6.24455
ENSDARG00000007067	si:dkey-19a16.16	-1.99649	-1.99778	-1.99838	-1.99716	-1.99781	-1.99841	-1.9963	-1.99873	-1.99943	-1.99644	-1.99717	-1.99688	-1.99878	-1.99943	-1.99812	-1.99683	-1.98527	-1.9987
ENSDARG00000007077	ankrd50l	8.84314	8.68713	7.73989	8.14574	7.97525	8.36414	8.40046	7.99527	8.69346	8.74442	8.11963	7.92431	8.1763	8.06266	8.65227	7.76646	7.61329	7.51561
ENSDARG00000007080	rhcgl1	-0.540968	-0.545205	-0.545264	-0.545128	-0.545209	-0.34929	-0.539627	-0.545291	-0.545346	-0.540627	-0.545131	-0.543827	-0.529404	-0.476404	-0.545241	-0.543428	-0.545315	-0.54529
ENSDARG00000007081	pias4a	9.96604	9.22653	8.91137	9.61817	8.87115	9.3919	9.01931	8.9778	8.81057	8.74571	8.75466	8.95612	9.49054	8.85567	8.62054	9.4357	8.5186	8.85917
ENSDARG00000007086	aqp10a	1.42506	1.93422	1.42361	1.42441	1.42393	1.42359	1.74397	1.42345	1.42312	1.42511	1.4244	1.42465	1.4619	1.76312	1.42375	1.42471	1.55091	1.51884
ENSDARG00000007092	xab2	10.3693	10.2598	10.1084	9.56937	9.54412	9.13562	9.00301	9.60395	10.0124	9.03356	9.65648	9.86741	9.54333	9.58014	9.54856	10.0211	9.52522	9.71338
ENSDARG00000007097	her13	7.53322	3.6588	4.37222	6.50631	6.05318	6.16447	6.2842	6.09758	3.58304	6.34286	5.67122	4.90211	6.10874	5.29453	3.64093	6.11479	3.60114	3.84464
ENSDARG00000007098	itm2ba	9.63247	10.2825	9.68866	10.3371	11.2134	11.0235	10.6002	11.5776	11.2014	11.1674	11.2912	11.6771	10.4678	11.4201	11.4642	9.89222	11.5337	11.5092
ENSDARG00000007099	cx43.4	11.8536	10.9025	9.85937	10.9594	9.43517	9.83222	10.0207	8.81992	10.1751	9.9411	8.17347	8.93061	9.9198	8.9412	8.18108	10.3275	8.45077	7.98402
ENSDARG00000007108	lipia	4.87937	4.48312	4.0063	4.50642	4.47707	4.00623	4.966	4.00546	4.00373	5.00607	5.7504	4.65467	4.26225	4.00404	4.35608	4.90966	4.13778	4.17622
ENSDARG00000007125	asb6	7.06628	7.84819	8.57563	7.15691	6.4465	6.48268	6.57455	5.83224	6.46332	5.76682	5.60511	5.10301	7.07172	6.14216	6.21732	5.66203	6.64142	5.7286
ENSDARG00000007127	acat2	6.92467	7.26171	7.81441	7.2144	6.69042	6.91298	7.32641	6.66758	7.5848	7.44713	7.3715	6.11669	7.21669	7.59038	6.75667	7.81984	6.90438	7.14168
ENSDARG00000007129	slc6a16a	6.61274	8.42299	8.41235	7.80005	5.70089	6.49967	7.42635	6.58148	6.75633	6.94208	6.54941	6.82049	7.14571	7.26022	5.94794	7.54419	6.19971	6.53503
ENSDARG00000007130	mrto4	6.78921	7.48795	7.58947	6.31635	5.29783	6.44783	6.32393	6.59573	4.10479	6.27118	6.0952	5.54648	6.49112	6.32557	6.26834	6.45843	6.43623	7.21139
ENSDARG00000007135	cnot3a	11.0307	10.7019	11.0402	10.5707	9.93971	10.1695	10.3291	9.8187	9.95876	10.5394	10.3641	10.1451	10.4592	10.3507	9.83505	10.2365	9.78058	10.212
ENSDARG00000007136	gtf2h4	6.77418	7.07961	7.11482	8.05054	6.60761	6.67564	7.82292	6.90037	7.00783	7.32709	7.17342	6.07551	8.11965	7.12004	6.79855	7.8721	7.25887	7.17383
ENSDARG00000007141	psmc3	9.89472	10.3511	10.1586	9.50984	10.111	9.72711	9.77131	10.1395	10.1235	9.41535	10.02	9.69351	9.73507	9.90093	9.81625	9.18873	9.62484	9.65968
ENSDARG00000007149	l1cama	7.85882	4.58471	5.89854	9.80405	7.41345	7.7908	9.10578	6.5765	8.36716	10.1683	8.60746	7.69165	10.9166	7.5922	7.5503	10.7333	6.81365	7.3015
ENSDARG00000007151	kcnk2b	3.84138	3.39016	3.38646	4.46075	3.63863	3.49287	3.86973	3.38474	3.82117	4.17304	3.39482	3.86859	4.93713	3.38184	4.29609	5.15107	3.81509	3.98953
ENSDARG00000007169	itgb1bp1	8.35238	9.51923	8.98402	7.47478	9.06083	9.19386	7.33567	9.75786	8.77924	8.17139	8.85196	9.39664	7.89698	9.14731	9.47913	8.05249	8.93597	9.11305
ENSDARG00000007171	aig1	4.38839	3.89678	3.88805	4.85992	5.51997	4.23784	4.81457	5.24618	5.87552	5.58003	4.71269	4.984	6.13893	4.04902	3.89157	5.48317	4.51672	5.14876
ENSDARG00000007172	plxna3	11.4243	10.5956	10.6641	12.0091	9.89492	9.97189	11.1165	9.8161	10.2147	11.4149	9.07676	9.85999	12.1609	9.36803	9.26881	11.5895	9.3478	8.9761
ENSDARG00000007175	recql	8.81919	7.24369	7.16102	7.83157	8.08042	7.70681	8.23974	8.63657	8.10566	7.65946	7.34698	7.93818	7.71479	8.05695	6.91294	8.23942	7.89859	7.99837
ENSDARG00000007179	sash1a	10.6771	10.9878	10.8964	10.0535	10.8669	11.0093	10.1986	10.6408	11.3617	10.4177	10.6859	10.9381	10.6311	10.9504	10.6668	10.0417	10.6516	10.8124
ENSDARG00000007180	slc30a4	7.32156	8.47397	8.35701	7.89109	8.84293	9.50939	8.04455	9.25314	9.20543	8.57823	9.60913	10.1977	8.23293	9.62705	9.03624	8.15631	9.32544	9.49348
ENSDARG00000007181	nadk2	7.17909	7.7287	7.69794	7.04686	7.20025	7.03647	6.95231	7.29223	7.51539	7.34723	7.10819	6.50426	7.31081	6.78008	6.83117	7.50233	6.92126	6.48338
ENSDARG00000007184	zbtb16a	12.2127	11.3133	11.8236	10.2158	8.14995	9.05935	8.65323	8.07382	8.80617	9.11245	8.1484	8.01731	9.97035	8.84823	8.45686	9.63542	9.65764	8.96052
ENSDARG00000007186	ppp1r8a	6.01356	5.96711	6.06107	6.15252	5.77894	5.84839	5.67911	5.49269	5.14341	6.1103	5.31633	6.15287	6.07151	5.01085	5.50638	5.53023	5.25521	5.45312
ENSDARG00000007195	grm2b	7.76308	6.50181	5.51141	8.20098	6.47209	6.38659	8.53406	6.06233	7.74661	7.60359	6.80538	6.25601	9.30108	6.96649	6.62819	8.79288	6.09232	5.76981
ENSDARG00000007196	rae1	8.13447	7.65419	8.36677	7.92655	7.70182	7.56381	7.9908	7.09842	6.9567	6.90412	7.48734	7.94306	7.45005	8.01076	8.02894	7.49906	7.35521	7.69063
ENSDARG00000007198	mta1	9.49048	9.21888	9.09444	9.61477	8.73622	8.59436	9.4099	8.90335	8.48566	9.7193	9.25777	9.11705	9.63268	8.47984	8.6983	9.85506	8.80666	9.16104
ENSDARG00000007199		-1.63645	-1.63893	-1.6401	-1.63774	-1.639	-1.64016	-1.63609	-1.59645	-1.64116	-1.63636	-1.63778	-1.63721	-1.64086	-1.64115	-1.6396	-1.63711	-1.64115	-1.64072
ENSDARG00000007207	cnpy2	6.43647	6.39682	6.62609	8.02484	6.63006	6.80996	7.0235	7.57496	7.65026	7.0188	7.19887	5.98016	7.44786	6.79843	6.47135	7.86816	5.74245	6.26991
ENSDARG00000007216	abce1	11.8344	12.5166	12.3849	10.6466	10.4521	10.9098	10.5517	10.6053	10.6114	9.75695	10.2432	10.3066	10.1394	10.8502	11.1207	10.8408	10.9	10.9931
ENSDARG00000007217	wdr55	6.25488	6.38452	6.0075	5.43619	5.86884	5.97381	6.35143	4.30562	6.29276	5.34274	5.08678	4.30689	5.31135	6.07596	6.12319	5.50595	6.23766	5.21295
ENSDARG00000007219	actn1	10.9074	10.1074	10.1137	10.113	11.2097	11.2735	11.4115	11.2754	10.8654	10.9277	10.6439	10.7997	10.4308	10.3063	10.3193	11.5432	10.9343	10.4544
ENSDARG00000007220	ncam1b	9.95848	5.78539	5.43602	9.23579	6.78351	6.38011	8.56192	5.94927	8.29213	9.36008	7.8894	7.74043	9.62409	7.60482	6.77337	9.59761	6.73871	5.70895
ENSDARG00000007221	pbk	8.23385	8.46028	7.91005	7.38152	7.43838	6.55061	7.91615	8.40562	7.55199	7.11416	5.77789	6.90003	7.14276	6.84695	5.64297	6.10373	6.44375	6.90312
ENSDARG00000007231	ryk	9.72661	9.22614	9.07652	9.20283	9.40553	9.24892	9.43024	8.66265	10.0973	9.33583	9.28472	8.8871	9.06412	9.24429	9.1982	9.29092	9.08385	9.12435
ENSDARG00000007241	mycb	9.03388	9.16169	9.4116	8.62017	10.0808	9.03758	8.01765	10.1654	9.36651	9.06029	9.35879	8.86155	9.52274	9.92199	9.80545	10.1698	10.1403	9.76709
ENSDARG00000007244	acp2	6.74856	7.27003	6.7762	7.58361	7.66876	7.62022	7.39421	8.63203	8.51501	7.26742	8.78257	8.89489	7.45845	8.72529	9.03054	7.72971	8.53271	8.63946
ENSDARG00000007245	rundc3aa	5.62557	4.15473	4.13826	6.07193	6.13983	5.60623	6.52981	5.44879	5.09841	6.54353	5.2252	6.30482	6.51803	5.48183	5.26744	6.54165	5.3805	4.75214
ENSDARG00000007247	ric8a	5.08128	5.25172	3.86013	7.02106	6.08674	5.53235	7.45616	5.47539	7.41357	7.4599	7.00515	5.48061	7.58071	5.76055	6.26	7.18113	5.34186	5.94788
ENSDARG00000007250	use1	6.97257	7.55359	7.22291	7.32563	6.5934	6.65783	7.27993	7.3491	7.29753	7.41778	7.47467	7.1183	7.28625	7.09743	7.59018	7.69896	6.18761	6.73808
ENSDARG00000007257	rab5ab	8.36482	8.36982	8.18927	8.10219	8.67338	8.8331	8.43455	8.18716	7.80613	8.51803	8.5308	8.75543	8.14996	8.54707	8.82691	8.12348	8.49536	8.29076
ENSDARG00000007264		8.98871	8.08953	8.83269	8.59009	8.88928	9.10593	9.25939	9.05314	9.15427	8.96037	9.08674	9.96234	8.77592	9.26402	8.73691	9.03957	9.21106	9.10084
ENSDARG00000007271	mynn	10.6229	10.6066	11.2684	10.3596	9.36144	9.49927	9.54693	9.90035	8.84139	9.58619	9.34441	9.38025	9.78165	9.31307	9.62942	9.5895	9.0204	9.39455
ENSDARG00000007275	si:ch211-251b21.1	8.57159	7.20531	6.30561	11.4604	15.8578	15.7092	13.1184	16.113	15.6379	12.4907	15.7884	16.6322	12.7104	15.7988	16.4197	12.563	15.2455	15.6028
ENSDARG00000007276	ela3l	0.952101	0.95089	0.950506	0.951393	0.950865	0.950491	1.34767	1.72557	0.949968	0.952158	0.951376	0.951659	0.997596	0.950032	0.95066	0.951716	0.950175	0.95034
ENSDARG00000007277	myf5	6.29739	4.54881	5.25122	5.33402	4.43895	4.51751	5.94481	5.139	3.94642	6.23229	5.52591	5.54327	5.36389	3.94803	3.96356	4.82086	4.58514	4.85175
ENSDARG00000007278	ect2	9.94619	10.3243	10.9225	9.32793	8.11041	8.01483	9.03856	7.49856	8.03471	7.49596	8.13194	7.23291	8.82143	7.54419	7.37439	8.34322	7.44943	6.79334
ENSDARG00000007279	yipf5	8.00423	8.06992	7.68693	8.37946	8.592	8.68463	8.24784	9.04897	8.1498	8.35629	8.10396	8.32945	7.94791	7.90487	8.53829	8.26815	7.86095	7.90349
ENSDARG00000007285	mrpl57	5.68699	6.08561	4.99348	5.39681	5.37848	5.66162	5.7035	5.47104	4.35198	5.29163	4.94047	5.62317	5.66383	4.94894	5.29778	5.90143	5.274	5.76486
ENSDARG00000007289	metrnlb	5.20726	5.47906	4.36402	4.35692	4.31364	4.68959	4.53167	4.12782	3.73357	4.59572	3.74925	3.75235	4.44753	4.39365	3.74132	4.75102	4.06564	4.35087
ENSDARG00000007294	aco2	11.2433	11.5124	11.1082	11.4329	11.0945	11.1099	11.3196	11.4013	11.3002	10.8993	11.8523	11.1124	11.3193	11.9991	11.5983	10.8271	11.5207	11.5511
ENSDARG00000007302	sh3gl3b	6.48472	7.11868	7.8381	6.67304	7.23855	7.3878	6.54133	8.45075	7.8381	6.77989	8.73403	8.51914	5.97746	7.17479	8.47689	6.5838	8.24307	8.04103
ENSDARG00000007315	tmpoa	9.5918	9.29795	8.82767	8.58472	8.45451	8.78188	8.79508	7.77997	7.58502	8.26453	8.37296	7.25295	8.1722	7.60129	8.16118	7.58379	7.70502	7.32573
ENSDARG00000007320	rpl7	12.6877	12.8775	12.0204	11.8115	12.4888	12.3368	11.9816	12.7247	12.7858	12.2505	13.0178	13.4511	11.5427	12.2438	13.0361	12.4898	12.9347	12.7915
ENSDARG00000007323	chmp4bb	9.13143	9.5055	9.15055	9.35337	11.2909	11.1972	9.41824	11.4451	10.8676	9.54424	11.306	11.5642	9.26337	10.6923	11.3645	9.09193	11.3815	11.3191
ENSDARG00000007329	tbx16	3.28195	2.93744	2.16588	2.16984	2.1675	2.16581	2.17394	2.16508	2.16343	2.17319	2.78014	2.17101	2.42709	2.16373	2.16658	2.65008	2.16438	2.16513
ENSDARG00000007344	tcap	3.82573	4.68277	3.77903	4.39795	6.16837	5.34612	4.06004	5.04893	3.76228	4.13653	3.80501	4.34496	5.40644	5.64087	5.65782	5.19885	6.23171	6.05624
ENSDARG00000007347	degs1	9.4282	9.5086	9.58021	9.01422	11.2421	10.9093	9.08699	10.2181	9.94202	8.75963	10.1497	10.7821	8.57419	10.1539	10.2461	9.29832	10.4754	10.369
ENSDARG00000007349	dmrt1	1.87561	1.8225	1.82202	1.82313	2.23618	1.822	2.28833	2.25171	1.82135	2.16934	1.82311	1.82346	2.04689	1.82143	1.82221	1.82354	1.82161	1.82181
ENSDARG00000007356	fgf20a	3.11833	2.63966	2.63861	2.64105	2.94457	2.63856	3.43506	2.63812	2.63713	2.64316	2.93377	2.64178	3.02109	3.21916	2.63903	3.32449	2.93157	2.63815
ENSDARG00000007358	cxcr3.1	0.448676	0.448169	0.44801	0.448379	0.766924	0.448004	0.448774	0.447937	0.447788	0.4487	0.448372	0.44849	0.536178	0.447814	0.448074	0.732374	0.447873	0.447941
ENSDARG00000007359	zgc:56596	7.23079	6.51719	7.72295	7.18173	6.79024	7.07467	6.92775	7.2572	7.70793	7.3379	4.15659	7.95075	6.72498	7.185	7.1501	6.74964	6.5494	7.07768
ENSDARG00000007362	sft2d1	7.60681	9.2545	8.9013	7.36658	9.14286	9.38196	8.24723	8.73055	9.12052	8.23583	8.85483	9.4069	6.99842	8.03219	8.84208	6.33855	8.21773	8.6924
ENSDARG00000007366	si:ch73-71d17.1	4.14624	3.58182	3.57801	3.58677	4.27822	3.57786	3.59591	4.87894	5.12244	4.02243	4.55951	4.00208	4.33529	5.01308	4.44351	3.82711	3.90385	4.06022
ENSDARG00000007369	tcf7l1b	10.3842	9.69439	9.7647	9.34507	8.98634	8.97016	9.72146	7.92556	9.11595	9.85791	8.50086	8.11593	9.45163	8.58263	7.63184	9.12232	9.6067	8.3239
ENSDARG00000007370	dysf	8.3955	9.71993	9.74052	7.48379	6.8048	6.93259	6.99715	7.30323	6.99229	8.26228	5.74443	6.75258	7.07911	6.91601	7.05801	7.74795	8.31442	7.74642
ENSDARG00000007371	slc26a3.1	1.91255	1.6378	1.63735	1.96848	1.63777	1.63734	1.63948	1.63715	1.63673	1.63927	1.63836	1.63869	1.63712	1.63681	2.28573	1.63876	1.92241	1.84159
ENSDARG00000007377	odc1	11.3127	11.6948	11.5261	9.7558	9.50839	9.09386	9.30727	10.3963	10.3437	10.3477	10.4569	10.0998	10.2994	10.8682	10.6012	11.5978	10.6903	11.441
ENSDARG00000007382	ubtd1a	4.21113	5.24543	4.17705	5.10749	4.83574	5.16666	5.51088	5.81738	5.49405	5.85929	5.68786	5.5178	6.00827	5.27382	5.4999	5.53465	4.83169	4.17338
ENSDARG00000007383	kcnk6	4.90223	4.49046	5.77995	4.49168	3.95899	4.44351	5.3309	4.4271	3.89822	5.49974	4.23066	4.50824	4.81515	4.69062	4.61282	4.55339	4.23044	5.0588
ENSDARG00000007385	cct7	12.3348	12.7342	11.9227	11.3349	11.6261	11.3093	11.4546	11.6336	11.2923	10.9501	11.5891	11.3201	11.3311	11.5178	11.7445	11.4235	11.459	11.8193
ENSDARG00000007387	irf2a	8.29299	8.26788	8.93741	8.44393	8.21572	8.06613	8.30788	8.38498	4.89777	8.02015	8.20137	7.97118	8.24104	8.14862	8.18576	7.97055	8.52631	7.97111
ENSDARG00000007396	rnd3b	6.93381	7.69182	7.07478	7.51126	7.98889	7.69614	8.29236	7.79	8.68024	8.04958	6.96768	6.45722	8.16389	6.86917	7.40014	8.09321	7.53623	7.33908
ENSDARG00000007398	lrrk1	6.97785	7.24955	3.33032	7.28527	8.07775	7.99476	7.95234	7.81771	9.07768	7.90004	8.70363	6.75309	8.07508	8.55388	7.70328	8.1207	8.43181	8.18346
ENSDARG00000007405	strap	9.47203	9.4643	8.86094	9.27255	9.10036	9.45879	9.1858	9.50711	9.06373	9.11772	9.18246	9.93434	9.26941	9.41767	9.29971	9.09967	9.38261	9.64672
ENSDARG00000007406	phox2a	6.26772	4.41834	5.33241	7.29816	5.844	6.06133	7.38282	6.27763	6.37147	7.30633	5.45679	5.90712	7.65562	5.41657	5.47939	6.52867	5.7796	5.29415
ENSDARG00000007407	barx1	6.54007	7.19532	5.68166	7.83469	5.32592	5.62951	8.82155	6.69249	6.64603	9.09625	7.42739	7.5085	7.71502	4.27788	5.47178	8.17664	5.41297	4.93824
ENSDARG00000007409	ppifa	5.59893	4.9361	5.88624	5.03973	5.58757	5.70614	5.2081	4.23712	4.9051	5.79689	6.32407	6.23015	5.33375	6.56845	6.4316	5.15186	5.42764	5.5754
ENSDARG00000007412	slc2a1b	6.5122	7.60527	7.63832	8.37494	10.0159	9.87476	9.43603	7.38815	9.28078	8.20091	9.542	9.36873	7.9513	8.64478	9.02155	8.22076	10.2825	9.61341
ENSDARG00000007413	arid2	11.4648	10.9669	10.7598	11.502	9.89209	10.2446	10.5471	9.3369	9.92676	10.3663	9.60921	8.98935	11.0425	9.94864	9.09162	10.4681	9.60447	9.70015
ENSDARG00000007418	chmp4c	4.18487	3.52306	3.51832	4.60479	4.12309	4.45718	4.65575	3.51612	5.22983	3.95672	5.49829	4.24963	3.61521	3.8352	4.11294	3.67613	3.5142	4.1389
ENSDARG00000007421	ftcd	3.97654	2.86684	2.69775	6.13671	5.57478	4.3979	6.70588	9.10357	8.86442	6.96052	7.87395	7.85522	5.39381	9.55663	8.66947	5.8194	7.9232	8.12835
ENSDARG00000007425	apol1	3.20539	5.14383	6.15506	4.23488	10.0338	9.9044	6.38318	9.7947	8.79782	7.41569	9.18265	10.16	5.46256	9.71519	10.5825	6.22823	9.61586	9.80093
ENSDARG00000007429	ndor1	7.79885	8.10076	8.32791	7.82955	7.45313	7.78076	7.22666	7.59526	8.4253	6.12084	6.67982	6.51094	7.54521	7.94041	7.84006	7.05608	7.23357	7.57145
ENSDARG00000007430	prdm12b	8.33448	4.87311	5.58762	7.51357	5.65988	6.37931	6.78956	5.04487	6.16231	6.58529	5.77557	3.75145	7.54768	5.34505	4.84625	7.3466	5.04311	4.97594
ENSDARG00000007436	avpr2aa	3.55669	3.52552	3.51516	4.49586	3.52485	3.51474	5.93426	5.79452	5.45711	5.85803	4.74545	3.82187	5.13047	4.0939	3.51934	4.92237	4.26357	4.1221
ENSDARG00000007438	ube2ib	9.81975	9.50755	9.56692	9.41384	9.18962	9.20378	9.72542	9.21053	9.58843	8.76418	9.35069	9.40198	8.98086	8.69657	9.28421	9.38994	9.06125	8.85111
ENSDARG00000007443	fbxl18	7.05579	7.54884	7.31119	6.88587	6.78281	6.59971	5.85034	6.82509	6.35858	6.43197	6.4182	6.28667	6.95214	6.6292	6.38632	7.16112	6.83721	6.27585
ENSDARG00000007444	ift81	6.43874	6.62399	5.28439	6.80291	5.60987	6.19198	6.27483	6.43406	4.23717	6.60907	5.04745	5.01525	6.69116	6.46493	6.44681	5.76934	6.4728	6.3221
ENSDARG00000007449	slc25a39	8.66366	9.85465	9.36055	8.9413	8.13098	8.37434	7.7954	7.8635	6.12166	8.59043	8.01193	8.181	8.32064	7.22885	8.06134	8.5663	7.88191	7.00668
ENSDARG00000007461	srgap1a	11.1478	9.74705	9.61436	9.61756	10.1753	10.3103	10.2173	9.99894	9.43897	10.0123	9.63208	10.3624	9.98395	10.5298	10.4252	10.003	10.2427	10.0382
ENSDARG00000007465	tdrd1	1.9176	1.13627	1.13589	1.13677	1.26274	1.13588	1.31153	1.13572	1.13536	1.13753	1.13676	1.13704	1.38576	1.13543	1.13605	1.13709	1.13557	1.15891
ENSDARG00000007467	ifit10	-0.895243	-0.901319	-0.901358	-0.898729	-0.901322	-0.90136	-0.894274	-0.901376	-0.901413	-0.894996	-0.898825	-0.897309	-0.718108	-0.901407	-0.901343	-0.897021	-0.901392	-0.901375
ENSDARG00000007477	fbxo8	5.77628	6.18711	5.89144	6.89157	6.62791	6.77708	6.45756	7.56519	7.53862	7.25685	7.04243	7.34191	6.89146	6.59515	7.70587	3.95018	4.06392	3.76297
ENSDARG00000007480	rpe65a	5.19388	5.50124	3.31531	5.25667	8.36965	8.53871	4.44293	5.60393	7.76468	5.07677	7.72673	8.12927	6.31359	6.00542	6.50538	6.58695	6.63572	7.81998
ENSDARG00000007485	epc2	9.28447	9.52887	9.61808	9.38249	8.58125	8.7959	8.8113	8.3313	8.7086	9.12028	9.14248	9.18842	9.34153	8.99299	9.31226	9.27212	8.88969	8.87347
ENSDARG00000007490	adrb1	4.10539	4.23796	5.4165	4.97452	6.02749	5.82815	5.28266	5.97515	4.05888	5.54278	4.09	5.06956	4.95397	4.77745	5.14979	5.30082	5.6251	5.06259
ENSDARG00000007494	st3gal8	8.91817	9.98695	9.67058	8.85928	9.72773	9.55613	8.84837	9.49788	9.82543	9.15199	9.33505	9.11318	8.87677	9.54113	9.61651	9.29447	9.72311	9.04632
ENSDARG00000007496	ufl1	8.35242	9.17516	8.74129	8.42808	8.96757	8.82714	8.72433	8.52369	8.84699	8.09063	8.80953	8.9023	8.63765	9.32654	8.86717	8.79659	8.41981	8.38943
ENSDARG00000007523	kmt2e	11.2547	10.2104	11.0272	11.5393	10.255	10.7058	10.869	10.4334	10.4891	11.2757	11.1267	10.3302	11.6784	10.929	9.63322	11.3614	10.5607	10.2847
ENSDARG00000007526	ndufs2	9.94254	10.4215	9.70538	9.67895	10.349	10.1109	9.46979	10.3738	10.9288	9.49138	10.4063	10.1363	9.89178	10.2286	10.4427	9.86473	10.1525	9.97155
ENSDARG00000007531	zcchc9	7.02081	6.12158	7.05865	5.93808	6.75616	6.22419	6.42881	6.44158	5.45956	6.26316	6.48646	6.67767	5.87412	6.53136	6.355	6.20329	6.61008	5.95057
ENSDARG00000007534	itln1	0.593531	0.592794	0.831305	0.593099	0.592778	0.592552	0.593673	0.614176	0.592236	1.18297	0.593089	0.593261	0.59244	0.592275	0.62066	0.593296	0.592361	0.59246
ENSDARG00000007553	opn4.1	3.04428	3.02157	3.01405	3.62934	3.16189	3.4937	5.16428	3.01052	4.25238	4.58024	4.3512	3.03616	5.0119	3.0435	3.01708	4.24943	3.39784	3.01073
ENSDARG00000007560	sema3bl	8.47753	7.5387	7.46131	9.62732	7.2934	8.20484	10.2146	7.83819	8.95299	10.0705	8.03527	7.84893	9.44013	8.14213	7.67532	9.24744	7.87557	7.85342
ENSDARG00000007561	cdh23	6.37926	5.95062	6.60397	6.10266	5.59111	5.41578	6.00915	6.62942	6.53304	6.89874	6.51114	5.26567	7.30404	6.26504	6.118	6.82188	6.1054	4.92495
ENSDARG00000007566	appbp2	9.49718	9.44195	9.15212	9.42823	9.20469	9.32077	9.05628	9.0701	9.02086	8.95674	8.87098	9.1999	9.62618	9.14118	9.03421	9.59731	9.22998	8.80449
ENSDARG00000007576	crybb1l1	5.73147	4.75197	4.87888	6.11628	5.35531	5.09119	5.85365	6.04887	7.63778	4.39698	7.301	3.82788	6.18883	4.34549	6.60079	7.09926	4.60747	4.5805
ENSDARG00000007582	si:ch1073-155h21.1	2.77309	2.06491	3.24665	2.25441	2.06484	2.06386	2.06867	2.06344	2.06249	2.06822	2.06618	2.66706	2.25281	2.06266	2.06431	2.06706	2.13113	2.16702
ENSDARG00000007597	bloc1s4	6.49795	6.75454	5.71177	7.04482	8.9647	8.48596	6.55651	7.82623	8.01252	6.85275	8.07304	8.9795	6.91691	7.25173	8.63484	6.34376	7.85059	7.6235
ENSDARG00000007601	zmynd8	7.90194	7.12658	6.71736	8.94766	7.83461	8.24723	8.75741	9.39399	9.15338	8.73435	8.08873	7.34263	9.54058	8.3666	7.49509	9.31905	8.09511	8.30637
ENSDARG00000007603	stxbp2	8.51272	9.52894	8.96397	8.11432	10.3762	10.3549	8.8098	10.2117	10.0225	8.64521	10.9186	10.7481	8.1141	10.3331	10.3595	7.56228	10.4378	10.7095
ENSDARG00000007614	wwox	4.84364	5.57119	5.98402	6.04626	6.88505	6.99919	5.81927	7.28323	5.85934	6.75181	6.55543	6.3681	6.00949	6.40488	5.80323	5.81922	6.48303	6.44386
ENSDARG00000007624	gins1	6.25955	6.06367	7.78503	4.82277	4.95709	4.77884	6.03961	5.93037	3.59375	5.81155	4.53457	5.83071	5.46626	3.59874	4.04373	4.09242	4.89139	5.32914
ENSDARG00000007630	mkrn2	8.38606	8.46104	7.90902	8.46235	7.77373	7.60527	8.46242	8.19418	6.31739	7.45485	7.63741	8.35921	8.29448	7.53281	7.72281	8.43916	7.36435	7.40644
ENSDARG00000007639	cnot4b	9.1789	8.70032	9.60048	9.09065	9.04607	9.17268	9.15346	8.73997	8.72832	7.65712	8.66766	8.89014	8.98955	9.38503	8.63311	8.92016	8.94048	9.42774
ENSDARG00000007654	nsfa	6.99826	4.21779	2.54772	9.88286	7.05965	8.09229	8.46909	8.09727	8.57372	9.84183	7.74223	6.63094	10.9305	7.72701	8.16127	10.2724	6.6184	7.73014
ENSDARG00000007655	crybb1l3	1.1242	1.60342	1.12263	1.24888	1.12299	1.12262	1.82093	1.12246	1.12211	1.12426	1.12349	1.12377	1.12244	1.12217	1.12279	1.12382	1.16153	1.12247
ENSDARG00000007657	ccnh	6.33408	7.27457	6.92033	6.65361	6.31673	6.74311	6.46101	5.83372	7.13783	5.71854	5.8825	7.06601	6.25445	5.92474	6.79872	6.41704	6.45925	5.54301
ENSDARG00000007663	amph	6.91299	2.971	4.77721	9.24923	7.12975	7.11775	8.56177	8.52838	7.58728	8.92114	8.01091	7.80717	10.2751	7.44317	7.28074	9.46459	4.4676	7.12259
ENSDARG00000007671	ghrb	6.1136	7.72113	6.2186	6.58346	7.39342	6.29618	7.99009	8.59643	7.94408	8.00971	7.06607	7.03818	7.25961	6.66707	6.7099	7.1896	7.00756	7.279
ENSDARG00000007678	ttyh3b	9.25746	8.4917	7.0141	10.9021	8.58958	9.33497	10.1274	7.95387	8.93509	10.5753	8.45561	8.81418	11.239	8.75416	8.61104	10.7172	7.85909	8.7387
ENSDARG00000007682	ppdpfa	6.57933	6.94026	6.65338	7.52469	8.42364	7.41725	8.2272	8.72457	9.06844	7.96545	8.63185	7.31241	7.76815	8.21395	8.07707	8.00384	8.78557	8.06838
ENSDARG00000007691	cul1b	9.21648	9.26344	9.80144	9.77142	9.26906	9.30273	9.21517	9.02599	8.7662	9.21152	9.21851	8.92284	9.40733	9.04266	9.4475	9.40448	9.35337	9.39968
ENSDARG00000007693	nfkbiab	9.70424	9.39586	8.80999	9.58904	11.5326	10.8663	9.90287	12.2129	12.2336	10.1781	11.8476	11.7202	9.83268	11.8311	12.0741	11.1287	12.1204	12.148
ENSDARG00000007697	fabp7a	7.85995	2.78896	2.52798	10.0824	7.94227	8.66576	10.2377	9.52835	9.50438	9.68711	8.90422	10.0118	11.2755	9.73575	9.83915	10.1268	7.95912	9.14327
ENSDARG00000007708	nsa2	11.5443	11.1754	11.977	11.213	11.6405	11.446	11.5739	11.9018	12.2874	11.9589	12.5423	13.2487	10.9907	11.9205	12.2459	12.2038	11.7274	12.2088
ENSDARG00000007709	adamts8a	5.17217	4.88481	6.26863	6.08323	6.27307	5.49047	6.35139	5.42684	6.67471	7.91095	6.97611	6.52478	6.44641	6.2708	7.0388	7.53656	6.76842	5.25494
ENSDARG00000007711	rab3il1	7.51187	8.85999	6.93117	6.87438	11.6859	11.919	7.67565	11.2483	10.0767	7.36967	11.4158	12.2108	6.83641	10.9536	11.1667	6.77196	10.9842	11.2926
ENSDARG00000007715	lgsn	0.82583	0.824739	0.824394	0.825193	0.860439	0.82438	0.82604	0.824234	0.823909	0.825882	1.59643	0.825432	0.871141	0.823967	0.824532	0.825484	1.08208	0.824244
ENSDARG00000007720	sub1b	6.81574	6.78043	4.2204	6.35381	7.24267	6.19785	7.50734	6.86661	6.68334	6.40822	6.77997	7.48844	6.8304	7.06363	6.64031	6.42977	6.72572	6.64304
ENSDARG00000007722	nudt8	6.7351	6.30947	7.27789	6.50249	6.7794	7.08518	6.3316	6.12594	6.77232	7.14688	7.168	5.73281	6.33006	7.40858	6.88129	6.45682	6.72793	7.04995
ENSDARG00000007723	efnb1	9.39815	8.13599	8.05212	9.30685	8.08857	8.55119	8.99496	8.55531	9.00007	9.01257	8.63996	8.92508	9.27251	8.56924	8.95249	9.25581	8.29182	8.18881
ENSDARG00000007727	rgl2	8.55154	10.1162	10.729	7.61322	9.09218	9.04488	7.5999	8.2902	8.43413	8.514	9.67332	10.1856	7.55647	9.08859	9.73526	7.31741	8.93699	9.03693
ENSDARG00000007734	stn1	6.33135	6.47814	6.77274	5.60128	6.49863	6.00853	5.99652	7.11189	6.8905	6.04869	5.59603	6.25533	6.22461	6.07995	6.38389	5.89817	5.64024	5.9224
ENSDARG00000007737	zyg11	7.86708	8.12496	8.43651	7.58942	7.71949	7.66721	8.41998	8.41163	6.2301	7.90815	8.97682	8.03964	8.50604	7.76488	8.37374	7.44459	8.05773	7.79404
ENSDARG00000007739	atp1a1a.2	10.045	2.419	2.38676	10.6943	5.53854	7.48863	11.8666	5.14177	7.46694	9.59971	13.992	12.4514	8.43285	10.2888	9.96668	7.75974	9.49036	8.24348
ENSDARG00000007743	il15l	3.6148	3.40738	3.4044	3.61175	4.21625	4.94339	4.49124	3.48746	3.4002	4.25323	4.14213	3.41331	4.25236	3.70473	3.4056	3.63939	4.1561	4.14609
ENSDARG00000007744	tsr1	10.0043	10.5513	10.1743	8.47894	8.25428	8.45107	8.39033	9.34313	9.18094	8.62328	9.02415	9.10083	8.44641	9.14049	9.29732	8.60226	8.99438	9.36147
ENSDARG00000007745	uqcrfs1	10.0706	10.1222	9.51478	9.67611	10.6943	10.4893	9.71099	10.1396	10.8201	9.51598	10.7242	10.3496	9.5993	10.3001	10.4904	10.3679	10.4726	10.7083
ENSDARG00000007751	lmnl3	4.9835	4.75076	4.82277	4.85466	6.15532	5.68457	4.445	5.5421	5.75965	5.58506	5.44015	5.60575	5.99248	6.37597	5.93719	5.97021	5.55495	5.6042
ENSDARG00000007753	cpne2	4.6901	4.52105	3.93402	5.29715	3.94806	4.57394	5.43161	4.53913	4.86018	6.8746	5.99276	4.9781	6.72275	5.09865	5.61521	6.7656	5.99844	5.83656
ENSDARG00000007755	wdr61	8.57322	8.37652	7.73841	8.18228	8.02621	7.97418	7.61251	8.02549	6.81502	7.57944	6.15161	7.83675	7.94913	7.65414	8.51296	8.07147	7.56482	7.62789
ENSDARG00000007760	spg21	7.45199	8.41066	7.49382	7.18392	9.60357	9.38276	7.64256	9.01689	8.23288	6.66942	9.03734	9.5476	7.38996	9.11925	9.50349	6.71049	9.38279	9.50036
ENSDARG00000007764	klhdc10	7.56792	7.77094	7.73325	8.2903	7.95121	8.43211	8.11917	7.68226	8.10467	7.78081	7.28179	8.00359	8.42523	8.11318	8.28043	8.62153	7.88756	8.15656
ENSDARG00000007769	sult5a1	2.70956	3.28011	3.48766	2.70743	2.70583	2.82882	2.88526	2.70422	2.70314	2.96983	3.35386	2.70823	2.85064	2.70333	2.70522	3.42299	2.76257	3.29348
ENSDARG00000007774	vash2	9.71906	9.21106	9.08538	8.82394	9.45628	9.26035	8.92374	9.49149	9.32642	9.4376	9.23825	9.55217	9.39899	9.06611	9.51553	9.28368	9.7313	9.84671
ENSDARG00000007783	blk	3.31579	3.30855	4.56398	3.40961	3.3084	3.56576	3.31718	3.7917	4.3473	3.31614	3.99836	4.10488	3.72396	3.57012	4.16551	3.3135	3.68404	3.85185
ENSDARG00000007786	tmx2b	8.24337	9.06617	8.88993	9.65002	9.0707	8.9999	9.67239	8.81491	9.25549	9.39222	9.73997	8.86625	9.35267	8.75107	8.72401	9.46177	9.24437	8.72353
ENSDARG00000007787	zgc:112965	1.68886	1.58881	1.58841	1.82642	1.58878	1.5884	1.69659	1.97764	1.58786	1.59013	1.58932	2.13996	1.5882	1.58792	1.58857	1.58967	1.82692	1.58824
ENSDARG00000007788	atp2b1b	5.53296	4.16515	5.57348	8.09717	4.71015	6.39542	9.08704	7.97711	9.38064	9.64782	7.98884	6.30925	9.10432	7.16492	5.87391	8.23196	6.30755	6.48587
ENSDARG00000007791	ppp2r1ba	11.3457	11.3526	10.489	10.7785	11.4782	11.6928	11.032	11.6157	11.5531	10.788	11.0969	11.4498	10.9963	10.9978	11.4061	10.4744	11.2658	11.2299
ENSDARG00000007795	cst3	6.77883	7.43449	7.29392	8.20934	9.55058	9.49035	8.67061	10.1483	9.1609	8.57472	10.2546	10.7275	8.46872	9.51584	10.1577	8.17586	9.82395	10.1448
ENSDARG00000007804	gas6	7.83056	7.10172	7.69985	7.01968	6.68121	6.82796	7.64946	3.77612	6.5994	6.81841	6.33927	6.39175	7.03614	5.7252	4.06832	7.72742	5.94231	5.38829
ENSDARG00000007807	cyth3a	5.69052	7.08591	6.86118	6.80334	6.70757	6.3812	6.69072	7.08738	6.35141	7.45359	5.47367	7.1794	7.602	6.10082	6.02547	7.32229	5.76133	6.30422
ENSDARG00000007808	zdhhc16a	6.81614	6.47833	4.21291	7.8269	6.79928	7.27026	6.95937	7.01868	7.93227	7.49473	7.13899	7.14232	7.75514	6.67573	6.72168	7.56062	6.7523	6.75492
ENSDARG00000007812	sp3b	10.1333	9.81133	10.1953	9.9803	9.38111	9.41676	9.83152	9.01127	9.66449	9.20276	9.46544	9.49777	9.85741	8.85318	9.4745	10.202	9.28718	9.36769
ENSDARG00000007813	rnpepl1	7.39584	8.44622	7.77767	7.25621	7.95113	8.18386	7.51531	6.90079	7.23743	7.28531	6.52077	7.70749	7.19491	7.82487	7.64418	6.27353	7.39226	7.36942
ENSDARG00000007818	palm1b	8.30268	8.84847	9.80185	9.36426	10.7368	10.8303	8.82069	10.1256	9.99545	9.95581	10.5276	11.0331	10.0956	10.3842	10.9564	10.726	10.5699	10.8081
ENSDARG00000007823	atf3	6.67136	7.92536	9.40474	7.27296	9.98526	7.7659	6.25968	8.39083	7.92618	8.27558	9.25174	8.69854	8.36132	9.38017	8.51404	8.3965	10.017	9.47035
ENSDARG00000007824	camta1b	6.22711	6.71134	2.60028	9.88374	8.22802	7.80867	7.87987	7.83316	8.49038	9.9491	8.399	7.81655	10.9177	8.00732	8.08337	10.4817	7.06435	7.09483
ENSDARG00000007825	map2k1	7.62328	7.25155	6.95593	7.89851	7.21826	7.37059	7.87944	6.9531	7.83741	8.04919	7.68056	8.3144	8.95639	7.68274	8.75374	8.88146	6.82016	7.59572
ENSDARG00000007836	ctsla	10.7035	11.5934	10.2878	10.7095	13.839	13.2974	10.7009	13.2633	12.7135	11.4177	13.7315	13.7932	10.9574	13.8708	13.9148	11.1628	13.4758	13.7655
ENSDARG00000007842	si:dkey-165n16.5	-0.689384	-0.694404	-0.69445	-0.693491	-0.694407	-0.694452	-0.688243	-0.694472	-0.694516	-0.689094	-0.693605	-0.691819	-0.609274	-0.694508	-0.694432	-0.691479	-0.550568	-0.694471
ENSDARG00000007856	rtn4rl1a	2.45893	2.45568	2.45465	2.50289	2.45561	2.4546	2.45956	2.45417	2.4532	2.45909	2.45698	3.13051	3.13896	3.30177	2.45506	3.0163	2.73182	2.89135
ENSDARG00000007863	tra2a	10.9496	10.4188	10.7259	10.9852	10.346	10.3863	10.1768	10.7921	10.3499	10.4744	10.4008	10.9258	10.7648	10.2326	10.4744	10.92	10.2554	10.5643
ENSDARG00000007864	pimr195	3.28974	3.44073	3.42902	2.82221	3.08306	2.77559	2.78124	2.7751	2.77399	2.83928	2.77831	2.77917	3.04069	3.04446	3.65039	2.92073	2.77463	3.19704
ENSDARG00000007867	dazap2	8.63095	8.75171	9.79728	9.828	10.1117	10.5551	9.92514	10.4866	10.1896	9.51488	10.7297	11.1303	10.19	10.7776	10.6696	10.1264	10.6336	10.9566
ENSDARG00000007869	ehd3	8.90923	8.02319	7.63861	9.47795	8.23791	8.75655	9.35294	9.41117	9.11535	9.60893	8.25694	8.74813	9.65048	8.83111	9.81403	9.70889	8.55604	8.46882
ENSDARG00000007885	fancl	4.68459	4.84826	5.09846	3.96985	3.9009	3.47606	3.99006	3.47455	3.47116	3.49141	3.48426	4.43082	4.18528	3.8671	3.97542	3.86681	4.30242	3.50609
ENSDARG00000007886	slc35b2	6.98623	7.03453	7.42626	7.24415	6.59518	6.80165	7.24141	6.58608	4.15786	6.43988	6.70318	6.1236	7.10783	6.79437	6.04668	6.3669	6.63812	6.89543
ENSDARG00000007891	meox1	8.31317	6.71474	7.02164	7.32599	6.0362	6.36001	8.32386	6.32436	5.52151	8.00703	6.33534	6.839	7.37394	5.52396	5.18512	8.03626	6.10505	5.3456
ENSDARG00000007892	pdcd2	6.6643	6.55035	6.00605	5.48345	6.01846	5.4487	6.32646	6.27258	5.88762	5.86563	5.62567	6.12564	5.78899	6.16637	6.23198	5.59772	6.00287	5.99596
ENSDARG00000007901	crnkl1	7.98707	7.499	6.97533	8.2187	7.44469	6.81857	7.73752	7.62009	7.83217	7.34342	7.78695	8.1231	7.53953	7.7482	7.48864	7.7132	7.45612	7.7599
ENSDARG00000007906	lrp2b	1.50694	1.50567	1.50527	1.50619	1.50564	1.71405	1.50718	1.50508	1.50471	1.98842	2.06329	1.50647	1.54517	1.50477	1.50543	1.59543	1.50492	1.70847
ENSDARG00000007912	si:ch211-196i2.1	6.52763	7.5911	7.36257	7.7102	7.15349	7.60986	8.38294	6.45167	6.25131	8.61018	5.96425	6.31326	7.78645	7.10735	7.1501	8.02502	6.40987	6.04973
ENSDARG00000007916	xpnpep3	6.55645	7.05487	5.68883	6.55285	6.76336	6.41987	7.28282	6.96343	7.02867	5.23688	6.42081	7.15291	6.7177	6.81987	7.13403	6.10988	6.83191	6.53031
ENSDARG00000007918	ttc27	9.58619	10.1846	9.70575	8.49128	7.83565	7.83811	8.37247	8.78054	9.46617	8.50745	8.44249	8.47513	8.71216	8.69889	8.27914	9.27451	8.68559	9.44293
ENSDARG00000007923	ptpn1	10.2085	9.75081	10.6453	9.45805	9.33683	9.37564	9.68722	9.29139	9.91241	9.35861	9.40186	9.05323	9.72273	9.35518	9.60956	9.85718	9.68529	9.74194
ENSDARG00000007941	hmx4	6.0715	4.49377	6.22222	7.03044	5.61169	6.0372	5.98678	5.7615	6.21419	7.11637	5.63913	5.71262	6.99399	5.91795	4.26039	6.71541	4.89439	4.74285
ENSDARG00000007943	gabpb2a	8.08156	8.47528	8.47319	7.67513	7.36607	7.49773	7.79669	8.30676	7.4457	7.73036	7.40071	8.0234	7.1612	7.48229	7.61046	6.75354	7.52022	7.71162
ENSDARG00000007944	lhx1b	5.58166	3.6803	3.66505	6.70329	4.39616	4.67024	4.93907	3.65784	5.5444	4.67968	5.1178	4.09654	6.01296	5.24333	4.17671	6.43613	3.65148	5.01749
ENSDARG00000007950	itga11b	4.43567	5.24419	6.2884	5.87484	6.68432	5.69135	6.62776	5.7728	6.93056	7.48494	6.02554	4.84539	6.18165	4.78902	4.54157	6.55109	6.63846	5.79087
ENSDARG00000007955	iars	11.424	12.1955	11.8381	10.1125	10.3189	10.6364	10.435	10.5955	10.6677	9.96632	10.759	10.3195	10.457	11.1268	10.4539	11.1524	10.643	11.1041
ENSDARG00000007959	hibadhb	9.04468	9.32227	9.2041	8.81306	9.33787	9.30897	8.56525	8.9402	8.704	8.59362	9.6204	9.69486	8.70321	9.1669	9.14646	8.88788	9.28243	9.49553
ENSDARG00000007960	hnrnpaba	12.166	10.799	11.6187	12.207	10.9645	11.2147	11.7164	10.8514	11.0953	11.2913	10.2858	10.5669	11.7826	10.8478	10.6194	11.9555	10.8362	10.9492
ENSDARG00000007971	cks1b	6.92438	6.93094	6.79468	6.07657	6.16002	5.90658	7.10018	6.51155	6.08113	6.2094	6.97309	6.5623	5.89056	6.43206	5.89624	5.61321	6.29226	5.57239
ENSDARG00000007975	fth1b	5.51068	4.50805	5.84451	6.55014	6.64446	6.24476	6.31128	7.85226	8.44955	7.32274	8.03145	8.92062	6.88752	7.73586	7.92728	7.25044	7.53809	7.70376
ENSDARG00000007976	si:ch211-220f16.2	9.04664	9.01586	9.02141	9.41427	9.2634	8.81248	9.29196	9.66176	8.61234	9.30733	9.02646	8.10843	9.40178	8.98581	9.28346	8.50356	8.81978	8.76737
ENSDARG00000007982	onecut1	7.64701	3.56251	5.92464	7.41072	6.29601	5.84581	6.17591	3.48726	3.43258	6.57766	6.47182	4.73189	7.34135	6.44829	3.9706	7.34703	4.7108	5.06819
ENSDARG00000007988	masp2	3.03345	3.02735	3.02541	3.57978	3.02722	3.41116	3.5651	3.9987	3.45363	3.03374	3.0298	3.03123	3.02439	4.37363	3.6016	3.03152	3.52798	3.62964
ENSDARG00000007989	nedd8	8.26889	7.06443	8.53608	9.01752	9.4573	8.93654	8.27515	9.53764	8.76646	8.11068	9.38825	9.77273	8.20027	7.8375	8.57148	8.57732	8.57686	8.90192
ENSDARG00000007990	wt1b	4.49254	4.18987	5.44005	4.96356	5.95681	6.39898	5.43865	6.02563	5.30564	5.9039	5.72226	6.48588	4.82457	5.28176	5.57856	5.46329	5.1414	4.61088
ENSDARG00000007996	pou2f1b	10.5656	8.72646	8.8216	10.6116	8.22954	9.17983	9.93145	8.23552	9.02433	10.3628	8.23768	8.13018	10.2622	8.65095	8.60309	9.81236	8.76892	8.46326
ENSDARG00000008010	zgc:194189	1.38832	1.68718	1.38736	1.61069	1.38757	1.61428	1.4339	1.38725	1.38704	1.58175	1.38788	1.38805	1.46461	1.38708	1.38745	1.38808	1.46877	1.38726
ENSDARG00000008014	nudt17	5.68688	6.35433	5.63505	6.37037	6.55822	5.91733	6.03739	4.33156	5.11314	5.73146	6.32835	6.59429	6.00688	6.59521	6.71902	5.61286	6.19067	6.71049
ENSDARG00000008019	mxg	0.653196	0.652189	1.47307	0.652607	0.723324	0.651858	0.65339	0.651724	0.651425	0.653244	0.652593	0.652828	0.807509	0.651478	0.651998	0.652876	0.651597	0.651733
ENSDARG00000008020	med31	7.92325	6.71942	7.78416	7.65085	7.66809	7.23157	7.45143	7.52943	6.87913	8.09786	7.72295	7.96069	7.03783	7.74599	7.83991	7.12483	7.90256	7.53941
ENSDARG00000008022	kif18a	9.67129	9.79655	9.79246	8.52869	7.52781	7.48539	8.57495	7.42023	8.53021	7.43082	8.01779	6.88597	7.82954	7.744	6.88737	8.47754	7.04299	6.78441
ENSDARG00000008026	fam129bb	9.97716	10.4976	10.6382	8.98347	10.8535	11.2345	9.84687	10.2757	10.2253	8.88009	10.7243	11.6076	8.95944	11.0033	11.5016	9.52302	10.8677	11.3717
ENSDARG00000008030	myl9b	8.33436	9.30366	9.28335	8.57076	9.96072	9.40421	9.51152	9.21779	8.93218	9.0098	8.73445	9.83843	8.63445	9.23896	9.43409	10.006	10.3322	10.0255
ENSDARG00000008032	sart3	10.619	10.0909	10.7339	10.3115	9.02336	9.0677	9.8215	9.03921	9.69369	9.14088	9.24769	9.6619	9.95135	9.65888	9.347	9.57157	9.49746	9.59984
ENSDARG00000008034	skib	10.1149	8.94497	9.19943	9.86776	9.24113	8.97439	9.98951	9.04194	9.30746	9.95243	8.31709	8.52149	9.91134	7.91701	8.63339	9.95973	8.70956	8.40153
ENSDARG00000008049	si:dkey-42i9.4	8.50811	7.26098	6.85083	7.85584	8.1668	7.25048	7.94051	7.15511	7.7303	8.24073	8.52389	8.55399	8.05627	6.01838	8.41306	7.8689	7.70074	6.25572
ENSDARG00000008060	scara3	3.72797	3.25254	3.21413	5.26924	5.35102	3.88455	7.14761	4.85604	6.49758	6.66314	3.29722	4.77682	6.48964	3.45798	3.22987	7.31274	5.47493	4.10723
ENSDARG00000008068	tma16	7.40391	7.88629	8.05162	6.60917	6.67164	6.47196	7.3106	6.08092	8.12692	5.87439	7.68197	7.73014	6.54787	7.19451	6.48434	7.38323	7.47447	7.31722
ENSDARG00000008075	illr4	3.72976	3.83674	3.43844	4.53034	3.78294	3.79652	4.63711	3.43731	3.435	4.35435	3.44397	3.44576	3.86599	3.85028	4.11403	3.77695	4.24495	3.87646
ENSDARG00000008097	srsf9	9.56942	8.90613	8.9017	9.4526	8.97642	9.15075	9.06912	7.65571	7.81951	9.00271	9.0583	9.4039	9.13598	8.44774	8.7033	9.49854	8.54592	8.70171
ENSDARG00000008098	ifit9	2.00678	1.40448	1.40402	1.40507	1.40445	1.40401	1.57911	1.40382	1.40339	1.40597	1.40505	1.40538	1.56633	2.08797	1.4042	1.40545	1.40364	1.40383
ENSDARG00000008100	slc7a10a	5.37528	3.97536	4.92337	5.70206	4.73471	5.81012	7.50156	6.41537	5.63808	6.73862	7.0708	6.39356	7.19574	5.7709	5.53163	7.06367	5.81157	4.64859
ENSDARG00000008105	mettl2a	8.28348	8.06474	7.85612	7.33147	7.41244	5.96654	7.61079	7.04082	7.6957	7.71566	7.05164	7.44728	7.2502	7.0666	7.69646	7.63415	7.23431	7.5538
ENSDARG00000008107	src	8.51807	7.85165	9.00661	8.95801	7.80705	8.15162	8.73192	7.32971	8.46594	8.36327	7.31611	7.32289	8.99914	7.67786	6.90665	8.77915	7.53639	7.40371
ENSDARG00000008119	si:ch211-195d17.2	7.21473	7.40355	6.93295	6.47734	7.39957	7.08213	7.50955	7.59317	7.53556	7.82456	6.72338	7.31845	7.07437	6.97854	7.5287	7.45081	7.18575	7.28673
ENSDARG00000008127	pcdh15b	6.05153	7.34796	7.8033	7.08387	3.6964	6.01287	8.40265	7.36146	8.31331	8.4256	7.59727	6.69654	8.92783	6.52401	5.87135	8.25428	6.39976	6.23127
ENSDARG00000008131	sox1b	6.76593	4.63001	5.69561	6.82305	4.98788	5.13696	6.32015	3.96216	5.90929	6.26613	6.16013	6.50656	6.45198	4.47848	5.33875	6.61573	4.39196	4.24275
ENSDARG00000008133	foxl1	4.02992	3.68744	3.66508	5.20001	5.01683	3.7441	7.14758	3.6544	5.31878	6.80194	5.42426	5.34219	6.54461	4.65036	5.49359	5.88686	5.44572	5.04437
ENSDARG00000008140	kcnab1a	3.9338	3.29425	3.43991	3.79006	4.00387	3.29248	3.77696	3.65952	3.29016	4.18131	3.29641	3.65998	4.0753	3.3563	3.29323	4.07498	3.5474	3.46086
ENSDARG00000008141	rbl1	10.6543	10.6596	11.045	9.135	9.34336	9.22943	9.50786	8.74045	9.72011	9.06776	9.34666	9.32951	8.90971	9.43296	9.08404	9.40937	9.76293	9.81428
ENSDARG00000008142	stxbp3	8.97437	9.63021	9.23196	8.48919	9.65922	9.31754	8.72675	9.71335	9.64244	8.432	9.7697	10.1201	8.6622	9.58682	9.50931	8.38746	9.76814	9.2887
ENSDARG00000008153	serinc5	10.1513	9.63502	9.94523	9.54513	9.49739	10.0748	9.70159	8.82079	8.3473	8.9536	9.2958	8.5183	9.51885	8.975	8.60225	9.3616	8.78537	8.47602
ENSDARG00000008155	sms	8.75712	9.65575	10.6664	9.13602	8.69897	8.31833	8.31841	9.6509	9.37928	8.29968	9.30541	9.80659	9.2523	9.07688	9.35831	9.00467	8.51699	8.9167
ENSDARG00000008164	btr33	2.40586	2.33903	2.33797	2.38893	2.33896	2.88659	3.085	2.33747	2.33647	2.34256	3.20306	2.34117	2.43217	3.22058	2.33839	2.34133	2.33704	2.5416
ENSDARG00000008165	caspa	4.54657	5.74986	6.17548	4.87647	5.11727	5.06373	5.32384	6.21844	6.6834	5.09785	6.52282	5.72167	5.07618	6.73796	6.48789	4.95122	6.50157	7.00227
ENSDARG00000008170	dbnla	3.6398	3.55699	3.55362	4.20153	3.81619	4.45005	4.28342	3.55206	5.375	4.28785	4.05575	4.33552	4.14316	3.94105	3.9189	3.7405	4.3602	4.18449
ENSDARG00000008174	hoxb1a	5.1574	4.34861	3.09551	3.97401	3.0994	3.57679	3.57779	3.09358	3.08961	3.11312	3.10488	3.10787	3.99659	3.35602	3.51383	4.44206	3.18722	3.76549
ENSDARG00000008182	si:ch73-111e15.1	1.72084	1.71924	1.71874	1.8743	1.71921	1.71872	1.72115	1.71851	1.71803	1.72092	1.71988	2.15185	1.76027	2.3638	1.71894	1.72033	1.84045	2.23395
ENSDARG00000008184	mia3	10.7548	10.8147	11.4651	10.7824	10.2698	10.4319	10.8216	10.0888	10.1793	10.537	9.82465	9.43387	10.6616	10.5451	9.98514	10.5331	10.2212	10.0852
ENSDARG00000008186	syk	6.173	8.56334	9.03386	7.63301	7.18556	6.64715	7.01214	7.19038	7.01197	7.98427	7.85426	7.11814	7.86072	9.06584	8.23368	7.60694	8.91408	9.25914
ENSDARG00000008188	sf1	11.4657	10.9465	10.7613	11.1636	10.6103	10.715	10.55	10.151	10.3885	10.6003	10.0462	10.4076	10.8842	10.8301	10.4568	10.3909	10.6651	10.4502
ENSDARG00000008191	tmeff1a	2.71246	2.70653	2.70464	3.27006	3.02849	3.01288	3.09927	2.70377	4.16214	2.8554	2.70892	2.7103	3.58151	2.7243	2.77967	3.76453	2.70301	2.70382
ENSDARG00000008192	pank1a	7.39307	4.94006	5.10881	8.36742	9.23395	9.60953	7.70518	8.92473	7.50927	8.36954	8.6742	9.12353	8.48917	8.64919	9.068	8.21602	8.46382	8.39932
ENSDARG00000008200	ugp2b	8.59671	9.2767	8.88926	8.94642	9.7828	10.0428	9.24547	9.51673	9.7534	9.86335	10.4663	10.8611	9.57074	9.8801	10.1375	9.39967	9.94602	10.1639
ENSDARG00000008203	pax1a	4.96333	4.14067	3.66512	4.60606	4.13514	4.37927	5.62428	3.66266	3.65762	5.03833	4.53034	3.68081	4.83307	4.34793	3.66723	5.15493	4.18801	4.01022
ENSDARG00000008209	myt1la	5.09261	2.80342	5.72863	9.70257	5.87807	7.52662	8.14756	7.53511	8.07212	9.92419	8.25732	7.70558	10.4501	7.22043	7.56325	10.0432	5.97244	6.5077
ENSDARG00000008212	kcnk13a	1.24911	1.24806	1.24773	1.42939	1.24804	1.24771	1.49743	1.24758	1.24726	1.24916	1.24848	1.24873	1.56152	1.24732	1.24786	1.82085	1.24744	1.24758
ENSDARG00000008218	znf410	8.71129	8.47898	8.37447	9.00313	8.12804	8.2929	8.09528	8.66424	8.58771	8.601	8.15875	8.98839	8.4393	8.2116	8.36878	8.98056	7.81375	7.62323
ENSDARG00000008219	crygm4	0.459351	0.458886	0.45874	0.70105	0.458877	0.458734	0.459441	0.458673	0.458537	0.459373	0.459072	0.45918	0.713179	0.62599	0.458799	0.459203	0.458615	0.458677
ENSDARG00000008224	vps35	10.2558	10.931	11.1876	10.2863	11.0669	11.3895	10.0957	10.8142	10.9576	10.0678	10.4084	11.2776	10.211	11.1038	11.0716	9.79797	10.9227	11.1862
ENSDARG00000008235	cog5	7.27593	7.18538	6.8952	7.5801	7.86015	6.63545	7.13356	7.58528	5.70439	7.48485	7.10282	7.5019	7.46847	7.16816	8.23154	7.75233	7.16741	7.60553
ENSDARG00000008237	sars	11.3139	11.1542	10.5763	10.4372	10.1917	10.5417	10.6302	10.5749	10.7213	10.3472	10.3771	10.5181	10.7301	10.8681	10.5958	10.6636	10.7202	11.091
ENSDARG00000008238	manba	6.32276	8.10347	8.32556	6.57374	8.0334	7.90066	6.94373	8.2678	6.29561	6.8228	8.19315	7.68191	6.88446	8.19162	8.23326	5.3483	7.88888	8.21062
ENSDARG00000008239	mocs3	5.74114	5.05479	5.15632	5.6189	6.43836	5.96632	5.86036	4.20552	5.71827	5.60732	6.15253	5.45102	5.28616	4.58968	4.21478	5.55335	5.75141	5.01399
ENSDARG00000008243	cct8	11.7317	12.013	11.2502	11.1891	11.1907	11.031	11.1283	11.4705	11.5827	10.9154	11.2395	11.7247	10.9878	11.2239	11.3634	11.1362	11.5309	11.6047
ENSDARG00000008247	vezf1a	9.90196	7.46808	8.02458	9.55894	7.44251	7.97671	8.80602	6.76947	6.58867	9.55663	7.13069	7.0551	9.21163	8.22961	7.73364	8.63683	7.70479	7.66629
ENSDARG00000008249	ptchd4	4.86208	3.72914	3.70429	6.44784	5.35957	4.49284	5.23709	3.69242	5.5296	6.77607	3.75899	4.93504	7.11523	6.2677	5.62214	6.70023	4.76135	5.87907
ENSDARG00000008255	cnot6a	11.5534	10.779	11.0982	11.4677	10.2375	10.7142	10.9462	10.7032	10.8014	10.9279	10.7389	10.5914	11.4279	10.4985	10.1994	10.8475	10.5045	10.6568
ENSDARG00000008263	mfsd4ab	3.4206	3.40017	3.39349	3.40878	4.20155	3.39322	3.71682	3.39037	3.38394	4.26217	5.65695	4.84084	4.13496	4.04593	3.8601	4.73847	5.16497	5.30925
ENSDARG00000008275	klhl24b	6.44425	7.20634	7.33449	7.8424	7.62636	8.09258	9.23191	8.11382	8.4122	8.83814	9.39104	8.5733	8.141	8.32549	8.46013	8.23394	7.77885	7.28341
ENSDARG00000008278	rcor2	10.5034	9.88189	9.74726	10.1227	9.03756	8.96965	9.28072	8.98495	7.99429	8.11554	8.39055	7.78504	9.77612	8.00395	6.60735	9.22218	7.73199	6.96756
ENSDARG00000008279	map2k7	7.91517	6.74868	7.10076	8.00079	7.88927	7.95761	6.79112	6.45569	7.38008	6.88815	7.44196	6.81236	7.94995	7.70277	7.97872	8.21982	7.88206	7.95191
ENSDARG00000008287	fam114a1	7.50548	7.5147	8.29476	7.66344	8.09064	8.24433	8.37819	7.41144	7.54521	7.9306	8.09734	8.12074	7.68774	7.9988	7.25786	7.73507	7.74903	7.21669
ENSDARG00000008292	eif2s3	11.6872	12.242	11.8395	11.4045	11.5049	11.5084	11.1502	11.7044	11.8132	11.2852	12.0483	12.1851	11.1143	11.2704	11.6375	11.8877	11.8618	12.0623
ENSDARG00000008305	hand2	7.4162	10.0802	9.81555	8.52683	10.2844	10.4607	9.30038	9.2728	9.24467	9.1507	8.34139	8.3219	8.8108	8.10974	8.2803	3.20101	5.60444	2.45289
ENSDARG00000008306	rdh5	1.9723	1.7605	1.75991	1.84738	1.76046	1.75988	1.76273	1.75964	2.65577	1.76246	1.76125	1.76168	2.13254	2.14321	1.76014	1.76177	1.90583	1.75965
ENSDARG00000008310	ip6k2a	9.4764	10.6981	9.93408	10.5938	9.80688	9.99285	9.98511	10.9143	11.2351	10.4251	11.4063	10.7778	10.4717	10.7356	10.76	10.4968	10.3666	10.7394
ENSDARG00000008322	ambra1a	9.40519	9.45943	10.0192	9.50765	9.00143	9.05074	9.5345	8.94945	9.57377	9.64472	9.24294	8.18386	9.13923	8.9752	9.32653	9.17273	9.06911	9.22915
ENSDARG00000008329	asic1a	4.20417	3.86584	3.75569	5.0973	4.40483	4.12451	4.86675	3.75286	4.56334	4.60874	3.7694	5.04327	5.93343	4.80886	3.93076	5.21434	4.32651	4.99775
ENSDARG00000008333	znfl2a	8.39103	10.8227	11.1529	6.84755	4.40655	5.7496	4.77719	4.28289	1.64988	7.12974	2.6164	5.7484	6.15311	3.66213	5.86774	6.71086	1.57017	4.70358
ENSDARG00000008363	mcl1b	8.1198	8.90002	8.73042	9.33244	11.587	10.7092	9.51664	12.4111	11.9284	9.63619	12.3514	12.7429	10.3376	11.9973	12.1438	10.7333	12.3833	12.5547
ENSDARG00000008370	csnk1da	11.254	10.609	10.9138	11.3452	10.9769	11.2959	11.1898	10.872	10.9808	11.3829	11.2699	11.3982	11.4921	10.9832	11.0505	11.5416	11.0295	11.2352
ENSDARG00000008372	spred2b	9.43984	8.72939	9.09363	9.52396	9.69575	10.0455	9.73311	9.05812	8.89285	9.54285	9.35191	9.34406	9.4142	9.48479	9.61619	9.45017	9.42166	9.34828
ENSDARG00000008377	epn2	10.8462	11.2889	11.3262	10.4822	10.2715	10.2113	11.0403	9.9063	9.59571	10.2492	10.0555	10.4018	10.3854	10.2638	10.0267	9.89954	10.3933	10.3856
ENSDARG00000008380	brd7	10.4658	9.18742	9.72344	10.5751	9.50959	9.69641	10.0752	9.4309	10.0444	10.128	9.61467	9.88353	10.0768	9.35372	9.97325	9.78437	9.53438	9.50459
ENSDARG00000008383	arpc1a	9.43119	9.72895	9.38091	9.66035	11.2782	11.3004	9.62836	10.2144	9.60202	9.83412	10.4544	10.9976	9.68756	10.3739	10.7309	9.50027	10.4684	10.6897
ENSDARG00000008384	hdac6	9.04546	8.98609	8.40988	8.44131	8.55544	8.78369	8.70474	9.12687	8.84132	8.737	9.26269	9.06079	8.80552	9.24749	9.37213	8.60662	9.13505	8.98755
ENSDARG00000008388	mmp14b	10.0622	10.3509	10.7916	10.351	10.2143	10.2765	11.1446	10.2767	10.7468	10.8424	9.91022	9.5913	10.1712	10.2179	10.6395	10.8397	10.5622	10.8179
ENSDARG00000008395	snupn	7.49389	7.64809	7.05608	7.23581	6.71342	7.39636	7.33927	6.74018	6.48814	7.00764	6.9442	6.7951	7.01919	6.84028	6.75401	7.46775	7.07449	7.15096
ENSDARG00000008396	ftr24	7.30693	6.88283	7.42054	7.06938	6.86814	7.29522	7.67347	6.47248	6.80484	6.56009	7.50159	6.78988	6.68065	6.96903	7.40819	6.78414	7.03083	7.36672
ENSDARG00000008398	cacna1c	7.2245	9.42043	9.9683	8.98053	9.83135	10.0297	9.25407	9.49592	8.89873	9.32408	9.20339	6.17378	10.2381	7.8658	7.51495	9.77329	10.4178	9.27769
ENSDARG00000008403	phospho1	4.87002	5.37224	4.11947	6.58006	6.2173	6.70261	6.58425	4.10545	6.53852	6.58739	7.00644	7.15842	5.79007	6.04153	6.36881	6.33183	6.7657	6.6959
ENSDARG00000008407	tspan7b	7.40135	8.74729	8.40544	8.4557	7.04977	7.36022	7.77484	6.15663	7.96087	9.08451	7.71376	6.49397	9.80788	6.5641	6.03534	9.06155	6.40982	6.42218
ENSDARG00000008413	atp11a	9.54296	9.46505	9.0361	9.3524	13.348	13.6606	9.31968	11.7045	11.4045	10.1709	12.1096	12.9662	10.0856	12.1983	12.3113	9.37832	12.5424	12.6623
ENSDARG00000008414	exoc3l2a	5.94744	5.79435	7.41465	6.37437	5.39534	4.5314	6.56855	4.38581	6.76733	7.67458	5.12753	5.82469	5.93015	5.99471	4.99277	5.6522	5.40567	4.68945
ENSDARG00000008433	unc45b	9.38474	8.34726	8.19123	6.67163	8.87181	8.63929	7.90649	7.78769	7.53487	6.83984	7.75507	5.99658	7.88674	7.89164	7.26684	7.7392	9.55502	8.47752
ENSDARG00000008434	bcl2l1	8.30926	8.61706	9.23036	9.43098	8.81373	8.58445	8.35543	9.57416	8.85925	9.33201	8.9146	9.42186	9.45626	9.12579	8.7516	8.77739	8.90001	9.10123
ENSDARG00000008439	atxn10	6.24553	6.10544	6.29452	6.2505	5.45721	5.07783	5.20806	6.43626	5.13113	4.9884	6.44756	4.3159	5.55592	5.05338	5.72537	5.63145	5.63318	5.88543
ENSDARG00000008447	fkbp4	10.7821	9.75464	9.35908	9.87382	9.97851	9.98952	10.02	9.76863	10.2307	9.63036	10.0428	10.1625	10.1979	10.3327	9.51763	9.71863	10.0157	10.1762
ENSDARG00000008450	pcolce2a	3.93295	4.39782	4.61082	4.87279	4.12889	4.04814	5.19582	3.46415	6.57741	3.51766	4.52135	3.50368	5.25115	3.45479	4.20003	5.76391	4.1535	4.08166
ENSDARG00000008454	cpeb1b	3.29635	3.61407	3.29203	3.29442	3.85312	3.97619	3.29698	3.78503	3.29059	3.2965	3.29438	3.29514	3.49788	3.96236	3.29244	3.47947	4.10328	4.12906
ENSDARG00000008457	faah2a	3.92026	5.58468	3.84243	4.57608	5.06252	4.37138	5.74488	5.22898	6.93753	3.92286	6.12938	3.89983	5.6352	6.56936	6.14025	5.25321	6.064	6.42298
ENSDARG00000008461	anapc5	7.45916	7.84542	7.91155	6.48891	6.81139	6.68579	7.50643	6.88968	6.19087	6.29369	6.51237	7.39018	6.53804	6.46521	6.43198	7.03965	6.81964	6.50555
ENSDARG00000008472	apex2	6.24424	6.90727	6.00721	6.47581	5.91641	6.11262	6.78677	6.01695	6.66108	5.89017	5.94161	5.64929	6.20971	6.04348	6.34194	6.21166	5.82772	5.91376
ENSDARG00000008473	asb14a	-2.16382	-2.16481	-2.16528	-2.16434	-2.16484	-2.1653	-2.16368	-2.16554	-2.16624	-2.16378	-2.16435	-2.16413	-2.16204	-2.16609	-2.16508	-2.16408	-2.16581	-2.16199
ENSDARG00000008480	trmt61a	7.21963	6.65198	8.1163	6.41194	6.69936	5.85783	6.07035	6.54721	6.5039	6.69172	6.49019	6.13967	6.47329	6.62842	6.75312	6.30159	6.60335	6.39087
ENSDARG00000008485	lrp3	7.25107	7.52323	7.42342	8.54226	6.89762	7.87528	7.15806	7.26117	6.97518	8.2854	7.0903	7.32644	8.39017	6.88039	7.0166	7.56094	6.10811	6.62289
ENSDARG00000008487	dmd	8.96886	8.86535	6.97162	8.79286	7.12502	8.94146	9.58013	9.3084	10.4902	10.0067	8.73138	8.98467	9.99018	9.32707	8.64455	9.41261	8.8603	8.20395
ENSDARG00000008490	ltv1	9.24422	10.2365	10.0773	8.69199	9.35108	9.45104	9.40927	10.164	10.4195	9.17818	9.09264	9.54525	8.81355	9.19183	9.23419	9.78049	9.33118	9.99289
ENSDARG00000008491	si:ch211-107o10.3	4.73314	3.95151	3.92702	5.23569	5.63443	5.00561	4.70111	6.02615	6.62907	5.09662	6.99835	6.77682	4.81338	6.62536	6.48359	5.23422	6.55003	6.56785
ENSDARG00000008494	myl6	7.88501	7.96538	8.28866	7.42356	8.81743	8.25643	8.23178	8.72739	8.84139	7.8118	7.98214	9.15728	8.26754	7.98985	7.69252	8.41811	8.37342	8.56534
ENSDARG00000008502	pno1	9.97089	9.91238	9.84681	8.56034	9.45846	9.47807	9.36125	10.3292	9.41347	9.61436	10.5179	10.8975	8.54906	9.86292	10.5295	9.45057	10.3841	10.1845
ENSDARG00000008503	glcci1a	8.20329	9.60051	10.0155	7.38851	5.78271	6.87115	7.31861	7.4665	2.6092	8.16546	7.42255	7.05455	7.98383	6.19385	5.56061	7.6807	6.6738	6.32029
ENSDARG00000008540	sox21b	7.6604	3.76993	4.74713	7.20183	6.45526	4.6639	6.85427	5.9571	5.26749	7.5519	5.91118	5.2866	7.00435	5.29306	5.67608	6.97218	3.91898	5.59404
ENSDARG00000008541	chia.4	-0.0998856	0.0294165	-0.100324	-0.100081	-0.100226	0.21415	-0.0986911	-0.100373	-0.100471	-0.0998696	-0.100086	-0.100008	-0.100379	-0.100453	-0.100282	-0.0999921	-0.100414	-0.0816177
ENSDARG00000008542	yod1	9.83203	9.53294	9.23104	9.9964	9.20374	8.95877	9.17681	8.68378	8.23927	8.58594	8.74938	8.45142	9.3562	8.25318	8.20767	9.31449	8.14103	8.17729
ENSDARG00000008548	arhgap12a	7.33685	7.42646	7.14007	7.1346	7.13157	6.77732	7.72609	7.86088	8.17843	8.33477	7.90853	6.68171	7.16486	7.91631	7.43414	7.05174	8.14839	8.22909
ENSDARG00000008551	pole3	8.1393	8.00867	8.19401	8.21601	7.53507	7.13681	7.53094	7.86145	6.7599	7.64281	6.92682	6.94637	7.4884	7.27933	6.97835	7.62109	7.44757	7.98715
ENSDARG00000008553	zgc:136872	2.21796	2.21601	2.2154	2.3611	2.21597	2.3819	2.57653	2.21512	2.21454	2.65758	2.45224	2.21725	2.42279	2.48809	2.81112	2.21734	2.29801	2.21513
ENSDARG00000008560	brap	8.23932	8.27716	9.20091	7.74561	8.27445	8.14129	7.78809	8.41392	8.53261	7.72948	8.28655	8.65072	8.16819	8.5604	7.52723	8.71659	8.30888	8.17995
ENSDARG00000008568	slc25a24	7.58861	7.29664	7.69769	7.23684	9.12642	9.39617	8.28409	9.23406	9.46591	7.57497	9.52378	10.0715	7.41107	9.27736	9.86934	7.39613	9.09083	8.87824
ENSDARG00000008573	fam20b	7.47438	7.74314	6.85084	7.68661	8.24913	7.9502	6.28347	8.82665	7.80672	8.00512	8.23502	7.8112	8.2184	8.07592	7.70685	7.82315	7.51474	7.74511
ENSDARG00000008575	lyst	11.2245	10.9509	10.8678	11.2051	13.421	13.4892	10.3954	12.5783	12.4287	10.4116	12.4615	12.9793	11.3908	13.0374	12.7197	11.0271	12.7066	13.1229
ENSDARG00000008592	mtmr8	7.31393	8.44835	7.99253	6.91975	6.68896	6.72857	7.12011	7.26316	4.12553	7.02879	6.67515	7.78235	6.74141	7.47249	7.72937	6.1829	7.85599	7.72288
ENSDARG00000008593	nbas	9.38411	10.0957	10.1586	10.0553	9.52307	9.94095	9.921	9.65893	8.56514	9.7737	9.47395	9.77722	9.81597	10.2205	9.21295	9.85033	9.83257	9.94504
ENSDARG00000008623	cops3	7.88621	8.43616	8.41958	8.30313	8.53845	7.9853	8.01549	8.18774	7.43016	8.53945	8.92141	8.35587	7.97561	8.13325	8.03157	8.06871	8.21258	8.16571
ENSDARG00000008637	mttp	5.8382	2.6669	2.49755	5.65571	4.70274	3.74364	7.0105	8.79165	8.93873	5.20047	5.27834	6.3791	3.85155	9.89006	8.24153	5.56338	7.9098	8.13649
ENSDARG00000008639	kifap3a	8.753	9.02257	8.72997	9.39673	8.87942	8.86835	8.93922	8.84309	8.67046	9.43333	8.79557	9.19793	9.78491	8.60297	8.73042	9.1935	8.13953	8.06643
ENSDARG00000008660	coro1b	8.06931	5.27328	6.8664	10.0432	8.29412	8.42271	9.45825	9.00154	8.24777	9.2772	8.32749	8.26553	10.158	8.06943	8.667	9.16834	7.26384	8.20102
ENSDARG00000008662	fign	7.03479	6.54863	6.40072	6.5834	4.89208	6.00701	6.95019	5.9082	5.99139	7.06394	5.21287	5.99592	7.19612	6.01119	6.19539	6.86542	5.43029	5.35607
ENSDARG00000008674	chrnb2a	3.10825	2.98159	2.97993	2.98376	2.98148	3.18473	3.22988	2.97916	3.27724	2.98706	2.98369	3.55636	3.5929	3.20541	3.54697	3.38023	3.96545	4.12409
ENSDARG00000008678	snx3	8.4193	10.0469	10.5298	7.90753	9.69309	9.67493	8.4419	9.58601	8.79679	7.77312	9.64406	10.6012	7.5741	9.27986	10.1204	6.98868	9.77997	9.75398
ENSDARG00000008697	epas1a	7.51488	3.4766	6.43942	7.4168	7.66688	7.742	8.06124	3.75551	8.06853	7.43575	9.8599	8.23802	7.03148	8.5102	8.4377	6.53938	8.04583	8.2067
ENSDARG00000008703	apeh	8.42858	8.72143	8.53279	7.78887	8.75449	8.95072	7.60928	8.66357	8.58898	8.17908	8.67645	9.14452	7.39041	8.36381	8.36971	7.26478	8.59271	8.6117
ENSDARG00000008706	paip2b	10.553	10.0359	9.7762	10.0585	10.171	10.1184	9.7763	10.5591	10.0328	9.82432	10.3843	10.1025	10.0628	9.68047	9.9873	10.118	10.0424	10.2991
ENSDARG00000008720	lmo3	7.52555	5.0253	2.91013	9.11175	7.89606	7.47953	8.0541	7.76588	6.65964	8.87285	7.34494	6.93101	9.4846	6.3192	7.15088	9.43704	4.21075	6.22683
ENSDARG00000008723	prkcba	8.6935	7.50888	8.25537	8.81182	8.19731	7.18532	9.15064	7.83098	9.58311	8.66159	8.75647	8.29466	9.46175	8.45318	7.73079	9.08216	8.15461	7.57323
ENSDARG00000008727	ranbp3a	8.79934	9.82371	9.87316	9.06361	8.47122	8.82797	8.70477	8.58473	8.58498	9.32098	9.16423	8.64431	8.76622	8.78288	7.94043	8.81398	8.73323	8.53175
ENSDARG00000008732	zgc:66479	7.82956	7.00171	7.49968	8.45717	7.76032	7.35701	9.48407	8.39715	8.86555	9.15058	6.95626	7.91658	8.77538	7.93741	7.94426	9.0826	8.21094	7.65285
ENSDARG00000008735	atp6ap2	8.24009	8.72615	9.18424	8.75239	10.0404	9.88994	8.19472	9.73453	8.84154	8.57001	9.00172	9.82789	9.1823	9.70614	9.77821	8.83066	9.83458	9.75718
ENSDARG00000008740	esf1	7.50597	8.24196	7.93882	7.14438	7.34894	6.62874	6.57718	6.81029	6.85804	7.01836	6.47748	6.67903	6.70917	7.23512	7.44203	6.6858	7.35727	7.20645
ENSDARG00000008748	ube2na	10.7428	11.0551	10.8131	10.2958	11.4544	11.3892	10.3219	11.362	11.2345	10.0061	10.939	11.151	10.1599	10.444	11.0762	10.3566	11.0378	11.1724
ENSDARG00000008757	entpd6	8.52739	8.30565	8.56173	7.90054	8.50027	8.39099	8.15573	7.72551	8.42568	7.7476	8.21027	8.65163	7.83295	7.79315	6.96432	8.2031	8.06739	7.98178
ENSDARG00000008765	tmed5	8.14031	7.24924	7.92623	8.32705	8.42998	8.54799	8.32448	8.95575	8.64636	8.35592	8.50437	8.2342	7.21364	8.41508	8.71983	8.58223	8.52993	8.72649
ENSDARG00000008767	tle2b	7.92435	8.31884	7.66048	9.07782	8.12548	8.21605	9.13237	6.60273	7.86007	9.22276	7.73874	7.21195	9.42484	7.03516	7.28727	8.06461	7.97467	7.87295
ENSDARG00000008772	cacng1a	4.71407	3.76891	3.76541	4.49015	3.95364	4.25753	4.76079	3.76379	4.97251	3.78039	4.82607	3.77589	4.67232	4.67899	4.16245	4.56108	4.48895	4.80514
ENSDARG00000008784	prpf4ba	10.0851	9.52941	9.89971	10.3463	9.47503	9.39385	9.60065	9.68083	8.32916	9.73062	9.24964	9.08338	10.072	9.57028	9.11976	10.0668	9.23089	9.55953
ENSDARG00000008785	dldh	9.60525	9.86759	9.60849	9.62867	10.4343	10.3375	9.69293	10.2508	10.6133	9.76387	10.6557	10.7809	9.90123	10.5029	10.6438	9.76999	10.4171	10.6758
ENSDARG00000008788	camk1gb	4.50982	3.83612	4.7327	4.94999	3.83553	4.48691	6.55284	4.81748	4.42972	4.56901	4.46318	4.56249	5.64195	4.76874	4.86846	5.84962	4.23475	5.04391
ENSDARG00000008790	actr3b	3.03019	3.02756	3.02673	3.02865	3.0275	3.33402	3.16919	3.02635	3.02557	3.31157	3.02861	3.49698	3.5041	3.68273	3.30307	3.60203	3.36625	3.41214
ENSDARG00000008796	her5	1.91527	1.48767	1.487	1.48855	1.48763	1.48698	1.4902	1.48669	1.48606	1.48989	2.55089	1.48902	1.51309	1.48617	1.48727	2.0084	1.48642	1.48671
ENSDARG00000008803	marcksb	12.8613	11.2069	10.6762	12.8617	11.5905	11.3744	11.6238	11.0056	11.388	11.8368	10.8704	10.7722	12.5498	10.4562	10.828	12.5658	10.2547	10.4013
ENSDARG00000008805	orc3	9.08091	8.94642	8.2444	7.49293	8.02224	7.69372	8.47066	6.785	8.38592	7.2069	7.31985	8.45718	7.45645	7.49536	8.1104	7.67154	8.03383	7.66725
ENSDARG00000008807	bokb	2.76282	3.40169	2.75652	2.94257	2.75794	2.75646	3.35782	2.75582	3.85964	2.76304	2.75996	3.52331	2.95989	3.66201	2.75713	2.7613	3.08577	2.78226
ENSDARG00000008808	eml2	6.7866	5.20909	7.09286	8.0649	8.15791	8.27967	7.47725	9.14413	7.73026	8.60638	9.75339	9.51648	8.40472	8.83788	9.24716	8.08591	8.89091	9.29356
ENSDARG00000008811	cmtm3	6.79746	7.03525	7.20387	5.80826	9.98516	9.70909	6.87146	9.11092	8.2763	5.28604	9.37556	10.1366	5.93015	8.57441	9.00856	5.53465	9.26312	8.99517
ENSDARG00000008816	glud1a	7.89728	9.32514	8.63927	8.31494	10.548	10.5327	9.96852	11.6556	10.9244	8.67877	11.2114	11.5395	8.82474	11.2084	11.6433	8.81205	11.2787	11.4469
ENSDARG00000008818	hsf1	9.12654	8.38304	9.08849	8.48502	7.75907	8.46677	8.32933	7.57929	8.66907	8.53849	7.77805	7.77826	8.46541	8.37145	7.76741	8.88678	8.14288	8.70124
ENSDARG00000008829	chga	5.10112	3.43276	3.40989	5.9003	4.10835	4.2982	4.98261	4.68271	4.21489	6.16837	3.46019	4.75833	6.47881	4.36473	3.41919	7.3013	5.00653	4.49814
ENSDARG00000008832	neu1	6.88214	8.73695	8.05937	7.37845	9.6087	9.1868	7.50733	8.79016	8.34983	7.91559	8.27494	8.93254	7.16415	9.08216	8.31299	7.37165	8.59037	8.94059
ENSDARG00000008835	si:dkey-46g23.5	0.93633	0.723803	0.723616	0.72405	0.723791	0.945713	0.724513	0.742166	0.723355	1.07658	0.724041	0.72418	0.723519	0.723386	0.723691	0.724208	0.723456	0.742342
ENSDARG00000008840	hmbsa	9.27813	11.4636	11.5178	6.78383	7.25597	7.23167	7.41717	5.43732	7.59279	6.57198	8.14996	7.42969	5.99502	7.20945	7.52443	5.50467	7.39501	7.60817
ENSDARG00000008849	ptprq	3.84165	3.82576	3.85864	5.17507	3.82542	3.92807	5.01826	5.25859	5.38338	4.9075	3.83219	4.61217	4.40046	4.67923	5.06559	4.35886	4.73169	4.91158
ENSDARG00000008852	elp4	6.78963	7.36921	6.63902	6.33029	5.62092	6.6879	6.28253	5.6691	6.57908	5.288	6.42139	5.93598	5.46231	6.15858	5.43211	5.95459	6.4194	5.59729
ENSDARG00000008858	cyp7b1	6.27321	6.12669	6.6233	6.44517	6.03489	6.32757	7.35779	6.5394	7.15405	7.47424	6.7547	7.21306	6.43439	6.92547	6.36582	6.17211	7.19768	6.70691
ENSDARG00000008859	mylipa	8.57901	9.20534	9.36033	8.68663	8.75855	8.86895	7.61532	8.7574	8.08298	8.04947	7.75466	7.78638	8.44109	7.97425	8.91292	7.72329	8.69563	8.44626
ENSDARG00000008861	tfap2e	7.25914	4.8401	4.26697	9.30251	10.1976	10.5056	7.00418	9.08692	9.15515	7.16514	9.33391	10.2108	8.71448	9.35896	9.31764	7.809	8.99298	9.29994
ENSDARG00000008866	cabp4	0.665168	0.664451	0.664225	0.664748	0.664436	0.664216	0.665307	0.664121	0.663909	0.665202	0.664738	1.18834	0.723852	0.968019	0.664315	0.66494	0.664031	0.664127
ENSDARG00000008867	rap1b	9.91844	10.7518	10.8906	9.24529	11.3267	11.3034	10.5353	11.5969	10.9995	9.75085	11.3182	11.7581	9.53398	11.2311	11.4416	9.76705	11.4929	11.5682
ENSDARG00000008880	usp28	6.59033	7.3009	7.40428	6.19384	9.02355	8.91965	6.09495	7.51617	8.11207	5.18338	7.30872	7.11059	6.3647	7.73026	6.88526	5.66456	8.93448	8.08536
ENSDARG00000008884	hprt1	8.00784	9.28035	8.72323	7.50332	10.3273	10.1265	8.80236	9.52081	9.46359	8.35621	8.66027	9.98781	8.04905	9.37207	9.34155	7.97601	9.68699	10.0419
ENSDARG00000008886	msx1b	8.14194	7.45464	7.14498	6.71577	8.58796	7.77488	7.30958	7.16144	7.02318	7.29638	7.0807	7.4243	6.83494	6.91722	7.28013	7.35709	7.15771	6.62367
ENSDARG00000008890	ctns	6.13782	6.86886	6.31568	5.99025	5.65157	6.60246	5.69566	6.10261	7.23871	5.6527	6.89722	6.66819	5.58702	6.81088	6.63466	5.70327	6.80579	7.24971
ENSDARG00000008904	smarca2	9.16988	8.66017	9.43507	9.56993	10.6653	10.8006	10.3166	10.9526	10.9032	10.4106	11.3295	11.2857	10.2165	11.2976	10.9807	9.85333	10.7731	11.2844
ENSDARG00000008906	si:ch211-241e1.5	6.74285	6.62655	6.35074	6.38277	6.92281	6.86988	6.1353	7.07689	7.23904	7.35691	7.10624	7.37565	6.93238	7.01102	7.13725	7.05333	6.1745	7.09934
ENSDARG00000008912	slc8a2a	3.13528	3.13003	3.12836	3.22165	3.12992	3.36643	3.76073	3.52102	3.12602	3.25371	3.13214	3.50618	3.46938	4.02889	3.79343	3.4058	3.84071	4.06421
ENSDARG00000008920	mrpl53	4.81534	5.00754	4.70551	4.86828	3.82324	4.10921	3.83926	4.0986	3.81328	3.83737	4.45197	4.1075	4.80982	4.30641	5.1432	4.57801	4.86003	5.30442
ENSDARG00000008931	renbp	6.675	7.17107	6.33312	4.64504	6.94056	6.61662	5.37944	7.92519	5.97191	5.19474	7.56556	7.95507	6.32743	7.65011	7.97351	5.82267	8.01356	8.17851
ENSDARG00000008936	sec11a	8.06513	7.60995	8.58719	7.99381	9.50714	8.26993	8.5394	9.06156	8.01372	8.02105	8.81638	8.8641	8.14363	8.31197	8.69769	7.64321	9.0161	8.24303
ENSDARG00000008946	ccdc127b	5.30737	5.58237	4.77986	5.41301	4.67671	5.13289	5.30363	5.2931	5.65262	4.29282	5.30046	4.96094	5.14373	6.00366	5.62486	4.83605	5.16671	5.56981
ENSDARG00000008947	rtf1	10.279	9.94973	10.2148	9.8796	8.86407	9.75578	9.71595	9.2375	9.44423	9.46525	9.20749	8.89524	9.87257	9.44611	9.48874	9.69158	9.48307	8.86301
ENSDARG00000008948	pla2g3	0.963625	0.962766	0.962495	0.963122	0.962748	0.962484	1.49436	0.962371	0.962117	0.963666	0.96311	0.96331	1.24803	0.962162	0.962603	1.20253	0.962262	0.983184
ENSDARG00000008953	pofut1	7.72563	6.95112	7.12272	7.02097	6.50976	6.99105	7.11938	7.48501	5.04988	7.09774	7.1141	6.54345	6.5037	7.08827	7.01057	6.89703	6.99158	7.04101
ENSDARG00000008966	tbl1xr1b	10.1961	9.8217	9.45596	10.2689	9.63338	9.94298	9.98486	9.86916	9.86634	9.69951	9.73855	9.34422	10.1504	9.78296	9.67053	9.41815	9.19664	9.36532
ENSDARG00000008969	fgb	2.81867	2.32382	2.08944	3.86645	5.77393	4.05612	7.66345	9.10068	8.22159	4.95996	8.31804	8.57011	4.13667	11.117	10.3715	6.45828	9.23335	9.66843
ENSDARG00000008976	mdn1	11.7468	11.9679	11.8157	10.87	10.3941	10.7439	11.042	10.2833	10.2084	10.4242	9.59234	10.3381	10.8868	10.8936	10.2628	10.3283	11.1969	11.0625
ENSDARG00000008979	golga1	7.9103	8.43559	8.02193	8.58754	8.95751	9.00831	8.80461	9.52786	9.13174	9.05078	8.01666	9.55842	8.87581	9.46865	9.02166	7.89004	9.1233	9.17995
ENSDARG00000008982	casq2	7.0587	6.51481	8.42436	6.8139	9.10342	8.80161	5.73851	8.91569	9.01354	6.81241	8.09582	7.15164	7.19362	8.42107	8.11054	6.7655	9.41914	8.07664
ENSDARG00000008983	sh3glb2a	6.11261	6.18962	6.77461	6.69008	7.54503	7.53115	6.90566	7.23371	6.91187	6.77306	5.44271	7.26441	7.23079	6.94819	7.08696	6.60087	6.70974	5.79798
ENSDARG00000008986	e2f7	9.28363	8.9559	9.16373	8.02817	7.67922	6.33252	7.88546	7.14619	7.68156	7.18571	3.56725	7.78014	7.29114	6.9081	6.56872	7.83727	7.56565	7.85659
ENSDARG00000009001	pdia6	10.3621	10.6242	9.60145	10.0917	9.63004	9.62475	10.5049	9.64632	9.56095	9.53609	9.0684	9.10139	10.0305	10.1938	9.38428	9.16195	9.55808	9.45026
ENSDARG00000009014	col11a1b	11.7574	10.1213	10.6748	12.8408	11.7779	11.2292	13.7593	11.5032	12.0601	13.9396	11.0996	10.7292	13.3721	11.3921	10.7835	13.9363	11.3403	10.4085
ENSDARG00000009018	rhbg	4.00949	2.82366	2.61598	8.11361	6.65093	7.34654	10.4415	7.4	9.36554	9.38905	9.37155	8.53525	8.59026	7.68906	6.966	7.36339	7.0695	7.15926
ENSDARG00000009020	cnr1	4.27743	4.70619	3.85847	4.54334	4.60094	4.03321	5.51364	4.87603	3.85069	4.66451	4.7449	3.87477	5.80843	4.52948	4.84355	4.3219	4.82664	4.99685
ENSDARG00000009021	chrna1	5.13715	4.84068	4.31382	5.86153	5.89541	4.55252	5.77159	5.53035	5.97912	5.90658	5.7373	5.18625	5.82621	6.33098	5.78449	5.74509	6.04579	5.5366
ENSDARG00000009023	ankrd28b	9.69823	10.1213	9.73255	9.31556	9.01966	9.04808	8.97213	9.33074	8.984	8.84067	8.56713	8.57799	9.2304	8.98755	9.04199	8.97368	9.08594	9.07792
ENSDARG00000009026	ank2a	9.42591	7.2453	6.90024	9.96578	7.97345	7.49919	9.43915	8.3277	8.89243	10.0829	8.54424	7.85677	11.0246	8.70118	8.49147	10.3472	8.02489	7.76614
ENSDARG00000009031	tnikb	11.0699	10.9845	10.8972	10.9788	9.89293	9.88706	10.5545	9.50752	10.1443	10.6249	9.84989	8.90146	11.3227	9.87435	9.4599	10.7466	9.25362	8.97356
ENSDARG00000009040	si:ch73-141c7.1	5.55745	5.60349	5.79997	6.27477	7.25062	5.75052	5.01351	6.25593	6.29083	5.89352	6.084	7.05828	5.9365	7.44063	6.33965	6.02122	6.98291	5.42123
ENSDARG00000009046	nphp1	6.09406	6.22666	6.22222	6.63142	5.4491	5.8296	5.83263	4.05381	4.03802	6.17196	4.79664	4.10813	6.07544	4.1194	5.85772	5.8065	5.24145	5.7541
ENSDARG00000009074	cbr4	5.10456	4.77497	4.05799	4.51903	4.92624	5.63718	5.63445	4.05498	4.04878	5.35135	4.85804	4.60236	4.95409	5.75007	5.095	4.99138	5.4525	4.95981
ENSDARG00000009079		4.20401	4.99872	5.56217	3.8329	5.37901	5.97137	3.85487	3.80682	6.10062	4.46269	3.83249	5.16531	4.67025	4.44654	5.63042	4.01516	4.7815	5.42371
ENSDARG00000009087	cd74a	2.69581	2.6754	2.66859	2.78247	2.67496	3.05605	3.34337	4.86302	4.02907	2.69674	3.79879	2.68854	2.66495	2.65992	3.46672	2.89621	3.61099	3.57665
ENSDARG00000009094	gata2b	2.27423	2.21632	2.21558	2.56216	2.21627	2.21555	2.21911	2.21524	2.21455	2.83829	2.21726	2.2178	2.50287	2.21467	2.67963	2.90676	2.50073	2.21526
ENSDARG00000009106	serinc1	9.11576	8.38611	8.64007	9.79048	10.4881	10.1296	9.49703	10.577	9.47419	10.0754	10.4548	11.2604	10.6131	10.3024	10.8094	10.4483	9.93855	9.85096
ENSDARG00000009113	pigc	4.10207	5.05417	4.06314	5.80218	5.79383	5.92326	5.39942	5.87671	5.43957	4.28918	4.63742	5.66581	5.43486	4.05102	5.64376	4.25556	5.37054	5.67304
ENSDARG00000009123	sele	6.44164	7.71598	9.14595	5.98438	4.71716	4.5081	3.4407	6.05317	7.39156	5.53943	3.2948	6.12187	4.95909	4.97942	5.46118	6.00399	5.49417	5.2848
ENSDARG00000009131	slc10a4	5.45137	8.39141	9.01079	6.26857	3.90067	4.54547	2.82004	2.60601	2.55457	2.80467	2.72944	2.75795	4.38419	2.56416	4.36422	4.15574	2.82838	3.82582
ENSDARG00000009133	myo1eb	8.78387	6.76259	7.27764	7.9247	6.61195	6.58856	8.97811	7.74278	8.71626	8.42545	8.41369	7.58774	6.6984	6.78382	5.88086	6.42684	6.95798	6.43476
ENSDARG00000009134	hlx1	6.31868	7.4876	7.65638	6.80112	5.23897	6.1725	7.49343	6.66757	7.45952	7.33682	6.20371	6.91691	7.46892	5.88303	5.80855	7.84912	6.6499	7.19977
ENSDARG00000009136	tp53bp2a	10.2393	9.86083	9.95514	9.48335	10.1498	9.86257	10.1196	10.0015	9.69103	10.6403	10.0979	10.7095	9.26885	10.1072	9.97541	9.91848	10.1433	10.3114
ENSDARG00000009142	ppp1r13bb	10.2381	9.67895	9.99536	9.92244	9.74413	9.85054	9.75515	9.70454	10.2049	10.4217	10.1709	9.95077	10.3685	9.68173	9.66636	10.3811	9.75534	9.42315
ENSDARG00000009153	pla2g1b	0.437032	0.436327	0.436105	0.43662	0.436313	0.436096	0.437168	0.436003	0.451068	0.437066	0.43661	0.436774	0.558783	0.435831	0.436194	1.06672	0.435914	0.480557
ENSDARG00000009160	kmo	3.22643	2.89128	2.74291	5.84532	6.36621	6.06755	5.44027	8.21001	8.49206	6.85832	8.03716	6.28229	5.1643	9.36614	8.23739	3.13534	8.2931	7.8511
ENSDARG00000009161	ftr55	0.1766	0.176127	0.175978	0.176324	0.176118	0.175972	0.176691	0.175909	0.703096	0.176623	0.176317	0.176428	0.175899	0.175793	0.176038	0.17645	0.175849	0.175913
ENSDARG00000009169	mob1ba	8.14264	7.90322	7.15749	8.07901	8.53567	8.48468	7.54227	8.70997	8.65448	7.7647	8.87682	8.93031	7.67427	8.27472	9.00404	7.06784	8.36663	7.90503
ENSDARG00000009170	ctr9	10.5213	10.2291	9.94889	10.0606	9.43211	9.53103	9.81042	10.1254	9.5059	9.42615	9.4786	9.84327	9.84832	9.6642	9.65574	9.98508	9.72261	9.33633
ENSDARG00000009178	zfand1	4.78978	5.00509	4.12522	4.85462	5.04239	5.19693	5.25177	5.21094	4.11816	4.40575	5.28433	5.53826	4.88455	4.98074	5.37222	4.58385	5.02844	4.77312
ENSDARG00000009194	col16a1	9.74969	8.7638	8.66203	10.281	9.36352	9.20673	10.8076	8.50221	9.44698	10.4198	7.74566	8.368	10.4592	9.20087	8.61401	10.5764	8.4018	7.97651
ENSDARG00000009196	anxa3a	5.08204	3.64868	3.63421	5.30413	4.86004	5.34578	5.4791	3.62739	6.68156	5.06601	6.56044	5.01617	4.33467	4.49971	3.64006	3.79408	4.93817	4.39984
ENSDARG00000009208	prkcda	6.13984	7.23064	7.33451	5.96684	5.36698	5.57496	6.91792	6.51186	6.10868	6.26284	6.79421	6.13997	6.66079	5.13324	5.82789	6.95343	6.05694	5.73292
ENSDARG00000009209	slc9a6a	8.20589	8.26395	9.0195	8.48258	8.22255	8.57081	8.35606	8.23956	7.989	7.82967	8.10549	8.18213	8.44848	8.12911	7.28955	8.17308	8.51292	8.2079
ENSDARG00000009212	ppiaa	13.1986	12.8244	12.3331	12.6393	14.0667	13.8255	12.8848	13.9845	13.5612	12.8423	14.1308	14.6713	12.7966	13.8292	14.5201	13.1708	13.9714	14.0798
ENSDARG00000009214	mfsd13a	8.36081	8.80322	8.85981	8.14989	9.10654	9.31729	8.96673	8.38216	8.77194	8.0013	8.47648	8.03058	8.3705	8.72719	8.05808	7.21641	8.33343	8.27212
ENSDARG00000009215	zgc:112437	2.65639	2.65241	2.65114	2.65406	2.65232	2.85194	3.54175	2.78816	2.64937	3.2986	2.65401	2.96597	3.44855	2.88625	2.65165	3.48591	2.7886	2.65059
ENSDARG00000009217	tom1l2	8.73723	8.80277	8.44081	8.75423	8.26862	7.70032	8.8817	7.70623	7.78808	9.54325	8.14481	7.72946	9.18296	8.45081	7.89555	8.19697	7.94362	7.96569
ENSDARG00000009218	mars2	6.482	7.01177	5.21663	5.88702	5.28717	5.82157	6.36647	5.13982	5.78565	6.56236	5.8634	5.7351	6.44906	6.13254	5.09283	5.70521	5.91856	6.29696
ENSDARG00000009242	fev	4.43313	4.66497	4.31427	4.23817	4.05052	3.83285	4.14561	3.58069	3.57767	4.44413	5.05444	4.43915	4.25902	3.57821	3.58343	4.24919	3.67332	3.60941
ENSDARG00000009250	etfb	9.31926	9.19081	8.0879	8.56747	10.3698	9.95643	9.38666	10.4088	10.217	9.31558	10.3107	10.4494	9.23359	10.52	10.8007	9.44851	10.258	10.1356
ENSDARG00000009252	napepld	5.46691	6.04477	6.98289	4.69646	7.07462	7.20772	6.51384	7.31036	7.75809	7.29885	7.84239	7.89244	6.40687	6.92828	7.7007	6.5018	7.30301	7.69494
ENSDARG00000009253	rtraf	8.7336	7.91664	9.0377	8.45309	8.83504	8.73998	8.63344	8.66653	8.71728	8.75875	8.88167	9.44569	8.23177	8.64919	9.11825	8.14821	8.59348	8.79272
ENSDARG00000009262	si:dkey-97m3.1	4.93794	5.99933	6.43164	6.66225	5.13805	5.41733	6.70049	6.20568	5.54514	6.37642	5.00043	5.01951	6.80923	5.61273	5.0332	6.4336	6.62728	6.79684
ENSDARG00000009266	uevld	5.30772	6.11964	7.37618	5.90122	7.12152	7.37859	5.87922	6.94293	7.55582	6.24503	5.96683	6.973	4.56154	7.24906	7.58449	6.38715	7.0971	7.053
ENSDARG00000009267	zgc:136439	5.59769	5.32389	5.65642	5.29589	5.2213	5.34341	4.65258	5.96398	6.13188	6.02445	5.38251	5.14047	5.29982	5.48238	6.3946	5.24506	6.04197	5.00572
ENSDARG00000009273	ppm1da	9.32086	8.2534	8.56954	9.22018	8.48115	8.23045	8.15577	8.41029	7.81168	8.7933	7.81734	7.37813	8.92156	8.28561	8.55451	9.11544	7.54923	7.95765
ENSDARG00000009280	smyd1a	4.68478	4.2236	4.20453	5.98849	6.25384	5.75954	5.5499	6.76203	6.80763	6.12502	6.20384	5.31046	6.09064	6.66845	5.8912	6.30704	6.08978	5.98191
ENSDARG00000009281	dnm1b	7.10904	2.85404	5.61536	9.3098	6.03334	6.9444	7.83841	7.82144	7.74683	9.29683	7.44422	6.88866	10.3837	6.87539	6.51049	10.1817	5.54914	6.83974
ENSDARG00000009285	rpl15	12.6161	12.6737	12.2395	11.906	12.75	12.5426	12.1984	12.5199	12.0852	12.3373	13.0137	13.4338	11.7993	12.379	12.8635	12.5853	12.896	12.832
ENSDARG00000009299	dusp8a	9.51095	8.11929	9.09945	9.87654	10.4654	10.1073	9.82895	9.39379	9.08817	10.43	9.55193	8.79629	10.8104	9.23114	8.99749	10.1908	9.86225	9.09158
ENSDARG00000009311	pvalb6	4.12836	3.47156	3.42054	6.26227	5.50176	4.79934	6.16743	5.85806	6.19785	7.24971	6.3054	6.52694	7.98349	4.86015	3.44153	7.71124	5.37821	4.6757
ENSDARG00000009313	zgc:63831	7.12176	8.96912	9.45728	5.95959	10.1344	9.8752	6.14325	9.67087	9.02806	6.26563	9.65063	10.0013	6.64365	9.54697	9.96606	4.84128	9.81286	9.77491
ENSDARG00000009315	clgn	10.4554	11.9744	12.1384	10.7608	9.62989	9.65711	9.5652	9.97042	10.1563	10.19	9.88493	9.71835	10.3218	9.82152	9.85364	10.1308	9.52609	9.46959
ENSDARG00000009336	aif1l	9.11202	8.77045	7.75216	9.17014	8.47547	8.52562	8.92881	8.36828	8.16056	8.4203	8.46214	8.51907	8.93578	7.99695	8.36665	9.36146	8.40431	8.92891
ENSDARG00000009341	nrap	5.34442	3.9404	3.88716	6.14989	7.17875	7.50268	6.29656	7.09521	7.67155	6.53344	6.74379	6.31504	6.81129	7.71616	7.16332	7.02909	6.9805	5.9285
ENSDARG00000009342	txndc5	11.1294	10.9551	11.7822	10.6712	10.4449	10.7961	11.1126	10.877	11.2545	10.5557	10.7981	10.3636	10.4652	10.6263	10.9168	11.0932	10.7613	11.0961
ENSDARG00000009346	caprin1a	11.5846	10.8885	10.9682	11.108	10.1172	10.4877	10.2278	10.0277	10.317	9.70555	9.95067	10.0536	10.4716	10.0451	9.96774	10.8747	9.96625	10.5121
ENSDARG00000009350	atg3	8.23892	9.17649	9.32914	8.22549	9.97926	9.75656	7.86784	9.27947	7.80938	8.18321	8.99282	9.80258	7.9463	9.16662	9.42028	7.83296	9.38435	9.52477
ENSDARG00000009351	fgf6a	3.47888	4.17235	3.46749	3.70527	3.47006	3.46737	3.68177	4.29503	4.65763	3.47929	4.62883	4.08085	4.32293	4.18484	4.44021	3.73617	3.95227	3.46629
ENSDARG00000009372	diras1b	2.85962	2.8435	2.83821	4.40265	2.84316	4.04044	2.86263	2.83574	2.83062	4.65118	3.62085	2.85383	4.01832	2.83154	2.84034	4.47043	3.34723	2.83588
ENSDARG00000009386	si:ch211-222n4.6	3.45202	3.60696	3.42459	4.99484	3.43091	3.93097	4.90696	4.08064	4.2045	5.42095	4.77868	3.44459	5.22818	3.59295	3.42731	5.40056	3.70619	3.4654
ENSDARG00000009387	robo4	10.6608	9.5358	9.40935	9.68781	7.6397	7.93549	8.14023	7.68636	6.97699	8.66348	8.65328	7.0314	9.18707	8.82684	8.20679	8.81637	8.38582	8.83806
ENSDARG00000009390	npl	6.74741	8.25547	8.72873	6.61144	7.61865	7.33913	6.59136	8.87394	8.86452	6.32027	8.51813	7.6576	6.70846	8.76294	8.60555	6.04373	8.40242	8.64835
ENSDARG00000009401	vcanb	10.6102	10.4441	10.4763	10.5283	8.61555	9.25508	12.2152	9.60867	10.4401	10.6304	8.83028	8.21991	11.1875	7.9039	7.94512	10.2693	8.76652	8.73177
ENSDARG00000009402	si:ch211-210b2.2	5.023	5.25864	5.63234	4.54608	4.39654	4.68246	4.90112	5.26567	4.08236	4.2375	4.90428	5.0373	4.85959	4.45777	4.96288	5.27241	4.55327	4.72821
ENSDARG00000009418	mef2cb	8.44796	10.1798	10.0297	8.9626	9.13507	9.08647	9.16184	8.88248	8.78906	9.18211	9.25638	9.21261	9.49536	9.94215	9.78269	9.28539	9.60023	9.73414
ENSDARG00000009430	tmem30c	4.08418	4.26391	3.9575	4.80723	5.20427	3.86393	5.22793	4.95377	6.19588	5.28037	3.88349	4.6157	4.32399	5.77183	5.66141	4.58874	5.37134	4.40441
ENSDARG00000009436	ubxn7	9.2341	8.97093	9.34905	9.13805	8.42378	8.40671	8.93073	7.08779	7.97893	8.31163	8.28991	8.13497	8.96283	7.98798	7.68524	9.09753	8.22349	8.19124
ENSDARG00000009438	myog	4.96133	3.62522	3.62127	4.29601	4.62394	3.62111	5.17904	4.47522	3.61568	4.5649	3.63019	3.63306	4.29167	4.27752	4.67174	4.69698	4.06571	3.81654
ENSDARG00000009443	zgc:92137	0.92674	1.11501	0.925683	0.926269	0.925919	0.925673	0.926895	0.945768	0.965847	0.926778	1.4518	0.926445	0.925551	0.925371	0.925784	0.926484	1.17788	0.925573
ENSDARG00000009447	atp5mc3b	9.74418	10.4287	9.46937	9.54235	10.7175	10.4414	10.03	10.4497	10.0352	9.62417	11.4266	11.0615	9.58167	10.5077	10.466	10.0689	10.7115	10.2023
ENSDARG00000009459	slc35e4	5.33009	4.68147	4.16079	5.02921	5.10513	4.82108	5.70541	4.8769	4.14942	5.54598	5.81423	5.41281	5.99845	5.47988	5.79206	4.89498	5.5567	4.70843
ENSDARG00000009466	rgs9bp	1.71259	1.71092	1.7104	1.71162	1.71089	1.71038	2.20789	1.71016	1.70966	1.71267	1.71159	1.71198	1.8502	2.34131	1.71061	2.26558	1.70995	1.83528
ENSDARG00000009470	hnf1a	3.79762	4.90926	5.20254	4.65637	3.77881	3.77298	4.40104	5.0322	5.92583	4.6522	3.85354	4.79781	4.11591	4.83171	5.0794	3.79184	4.52137	4.40534
ENSDARG00000009471	nid2b	0.824306	0.823608	0.823388	0.823897	0.823593	0.823379	0.824441	0.823287	0.823081	0.82434	0.823887	0.82405	1.03988	0.823117	0.823476	1.22792	1.12723	0.823293
ENSDARG00000009472	med19b	7.03389	7.12299	7.76436	6.93067	7.20698	6.67265	7.086	7.63379	6.70136	6.97211	7.00587	7.17899	7.14374	5.76097	7.20323	6.87788	6.90452	6.78636
ENSDARG00000009473	ppardb	8.54763	8.56771	8.27109	9.00995	8.40941	8.72991	8.77974	9.26006	8.69179	8.63006	9.23756	8.69724	8.52857	8.27832	7.96406	8.64494	8.56769	8.90533
ENSDARG00000009477	prkar2ab	4.43807	4.21675	3.78286	5.47977	4.06769	4.88718	5.26511	3.77988	3.77373	5.36674	3.92943	3.80189	5.36379	4.1333	4.93014	5.5337	4.70474	4.87495
ENSDARG00000009480	pdcl	9.0332	8.38747	7.92857	9.76143	9.5596	9.38311	9.51352	9.20122	9.39245	9.47232	8.75223	9.05391	9.57524	8.8049	9.40903	9.62784	9.09238	9.43458
ENSDARG00000009482	slc38a8a	0.256522	-0.0221895	-0.0222974	-0.0220473	-0.0221966	-0.0223018	-0.0217797	-0.022347	-0.0224481	-0.0218297	-0.0220522	-0.021972	0.182368	-0.0224301	-0.0222543	-0.0219557	-0.02239	-0.0223441
ENSDARG00000009484	arf1	10.9906	10.9684	10.9665	10.4591	11.0695	10.9762	10.5332	10.6233	10.5371	10.1238	10.7867	11.0785	9.84939	10.7504	10.8437	9.78003	10.5836	10.7453
ENSDARG00000009488	gipc2	6.00266	4.04155	3.99977	6.05165	6.62526	6.19973	7.28831	6.37359	7.75101	7.20902	6.60848	6.8819	6.94231	7.06104	6.31338	6.82053	6.28709	5.37167
ENSDARG00000009493	si:ch211-45c16.2	8.66581	5.65275	5.56395	10.179	8.13194	8.39611	9.19555	8.38519	6.76656	8.74515	8.12831	7.02501	10.1731	7.78188	7.9372	9.36647	7.43963	6.61248
ENSDARG00000009494	xrcc1	9.90787	9.2627	9.3057	8.46445	8.34078	8.425	8.86278	8.34727	8.48754	9.03813	9.09981	8.79069	8.6264	8.67776	9.00719	8.7645	8.45936	8.76818
ENSDARG00000009499	syne1a	10.8785	10.948	10.8793	12.3679	11.0268	11.1452	11.8587	11.2359	10.8381	12.3763	10.4086	10.9529	12.8681	11.1521	10.8009	11.767	10.7973	10.6876
ENSDARG00000009505	prelid3b	9.76906	11.3455	11.6634	10.2399	12.0325	11.9848	9.29583	11.3849	11.9266	9.60436	11.4643	11.3538	10.3685	11.4041	11.4287	11.1189	11.7218	11.784
ENSDARG00000009511	tnfa	-1.34326	-1.34709	-1.34869	-1.34525	-1.3472	-1.34869	-1.34271	-1.3487	-1.34871	-1.34312	-1.34531	-1.34444	-1.3487	-1.34871	-1.34812	-1.34428	-1.26488	-1.3487
ENSDARG00000009524	rnf150b	7.85242	7.41885	7.83776	8.05501	7.66551	7.19293	8.49449	7.44935	7.99061	9.0279	7.76222	7.4283	7.78253	7.40522	7.45939	8.12084	7.96718	7.06934
ENSDARG00000009525	tial1	9.21218	8.72576	8.40821	9.82896	9.87438	9.78828	9.56683	10.1763	8.93872	9.25752	9.26457	8.93786	9.41093	9.012	9.5458	8.63139	9.30936	8.52163
ENSDARG00000009534	wls	11.2047	10.4596	9.35751	9.87661	10.1065	9.77359	10.5913	10.0485	10.1475	10.7419	9.03936	10.0745	9.91865	9.52909	9.75913	10.7802	10.136	9.51876
ENSDARG00000009544	cldnb	6.43106	3.53364	3.43675	6.87948	7.16151	5.96264	7.2168	6.31042	8.30182	7.62666	9.06826	7.55836	6.45541	7.4107	5.99185	6.95972	6.90667	6.80667
ENSDARG00000009549	ubr4	12.8596	12.7024	13.0366	12.9749	12.964	13.4114	12.58	12.1789	12.1992	12.5862	12.5224	12.6907	12.98	13.0764	12.3663	12.5759	13.0568	12.9999
ENSDARG00000009550	foxi3b	6.89074	5.49914	3.49473	7.07131	3.5577	5.98717	7.81133	5.29801	7.35907	7.61985	8.45948	6.89137	5.79034	5.0018	5.80037	5.87112	5.43015	5.68818
ENSDARG00000009553	gng3	5.98997	3.27648	3.14786	8.53792	6.8488	6.48996	7.68968	7.85828	6.9073	8.50024	5.87364	6.87385	8.68876	6.22574	7.9017	8.89634	5.71892	6.09403
ENSDARG00000009557	wrap73	7.20492	6.86494	5.70942	6.61945	5.53633	6.14465	6.14574	4.23716	6.85162	6.51513	6.07497	6.37332	6.28903	4.77115	6.03184	5.85006	6.17453	5.79932
ENSDARG00000009567	spegb	7.79936	6.2373	5.19641	10.1119	8.78551	8.81486	9.15606	8.64176	9.28412	10.3988	8.75305	8.19158	10.8812	9.1524	8.79865	9.55496	8.59364	8.56869
ENSDARG00000009568	ca10b	3.36208	3.20977	3.59507	4.10504	3.20958	3.67413	4.14311	4.63965	3.2029	3.36504	3.21336	3.21543	4.73052	3.8228	3.24725	3.54655	3.7041	3.42318
ENSDARG00000009585	papola	10.6203	10.2783	10.5567	10.8363	10.6709	10.8751	10.687	10.8635	9.66997	10.3457	11.0232	10.7355	10.7732	10.7312	10.6314	10.5054	10.4935	10.2918
ENSDARG00000009594	nr1d2b	9.71713	10.2367	10.4836	10.3648	11.596	11.161	11.1958	11.576	11.7001	11.71	11.4097	12.0509	11.4037	11.8293	12.0185	11.1503	11.6442	11.4033
ENSDARG00000009607	ccnc	8.08268	7.86142	8.12413	7.71599	8.07864	7.81472	8.37249	7.3561	7.75084	8.53901	7.6332	7.64118	7.84643	7.78217	7.94353	7.68446	7.76452	7.66336
ENSDARG00000009610	rgs12a	9.76704	9.23496	10.107	9.7719	9.72423	9.92908	9.03648	9.20046	9.27315	9.47548	9.57967	9.81224	8.86901	9.63554	9.89088	8.46615	9.61454	9.27013
ENSDARG00000009624		2.78811	2.78454	3.28693	2.78602	2.78447	3.33564	2.7888	3.43618	2.78183	2.78828	3.21314	2.78681	2.78282	2.95988	3.18629	2.8821	3.443	3.45031
ENSDARG00000009626	nrbp2b	4.62659	4.76734	3.68031	5.28792	3.68924	4.06439	5.36104	3.67585	3.66658	6.03125	4.34891	5.02323	6.07359	4.75901	3.74372	5.39827	3.92204	4.90108
ENSDARG00000009629	unc119.1	9.93042	9.16021	9.44562	9.39123	7.94561	8.30731	9.16902	8.50101	8.65645	9.19143	9.24439	8.01954	9.29618	8.72914	8.25745	9.37968	8.29005	8.29
ENSDARG00000009637	rcvrn3	2.81612	2.41514	2.23	4.89593	5.4166	3.47571	10.3536	8.10867	9.14257	6.73948	7.23022	5.18671	8.88553	6.15031	5.01654	7.7468	4.22092	5.19048
ENSDARG00000009640	psmb1	10.2465	9.83928	9.63776	9.96199	10.683	10.6206	9.57766	10.1727	10.0097	9.22117	10.6204	10.4561	9.42035	9.45479	10.0964	9.92871	9.95063	10.1471
ENSDARG00000009653	lhfpl2a	7.63506	7.6228	7.41559	7.73963	7.60657	7.49292	7.47726	6.5257	7.52849	8.06305	7.1457	6.20557	7.17571	6.72308	5.71317	7.43695	6.89864	6.58501
ENSDARG00000009657	fgfr1op2	7.65444	7.1552	8.373	7.26663	7.6408	7.23878	7.44226	8.59602	7.32268	7.27645	7.97449	6.97913	7.27357	7.32286	7.92501	7.78152	7.30875	7.53101
ENSDARG00000009673	si:ch211-197g15.6	0.987667	0.986273	0.985832	1.16941	0.986245	1.14874	0.987935	0.985628	0.985213	1.94432	0.986833	0.987158	1.03579	0.985287	1.01955	0.987225	0.985452	0.98564
ENSDARG00000009677	dlg1	9.64622	8.32166	8.93441	9.22037	10.4915	10.598	9.75743	9.91448	10.1509	9.06961	9.76044	10.1362	9.81477	9.7132	9.891	9.5726	9.63363	9.64615
ENSDARG00000009681	med27	7.51302	7.59739	7.18982	7.42679	8.03873	7.64963	7.373	7.44224	6.55868	6.81701	7.26001	7.46875	6.90664	6.76416	7.02948	7.8719	7.26873	7.28887
ENSDARG00000009685	ppa2	6.92456	5.54377	6.93757	7.18439	7.08084	6.81434	7.6682	6.95435	7.63082	6.24199	7.3558	7.24993	7.10393	7.24656	6.82498	6.59922	7.20795	6.6873
ENSDARG00000009689	daam1b	11.2589	11.2488	10.8254	11.2525	10.3599	11.062	10.5545	9.77672	10.3983	10.7389	9.53657	9.11182	10.8455	9.82009	9.32516	10.6937	10.8424	9.79556
ENSDARG00000009693	llgl1	9.97261	9.32804	8.52503	9.23612	9.55248	9.33143	9.43879	8.89776	9.46113	9.43174	8.53641	8.48605	9.41746	8.68829	8.37566	9.53674	8.28836	7.63137
ENSDARG00000009702	ascl1b	3.79998	3.68385	3.67695	3.69276	4.94529	4.07324	4.65055	4.43859	3.66709	4.74826	5.12404	5.67207	3.91432	5.40028	4.14518	3.99113	5.41227	5.32854
ENSDARG00000009724	rpn2	10.947	11.267	11.1179	10.8876	10.8222	10.6385	11.1873	10.4493	10.6732	11.1983	10.7377	10.4052	10.7194	10.7376	10.6724	10.6547	10.4168	10.2422
ENSDARG00000009727	twf2b	4.31597	4.01196	4.00169	4.94867	6.10567	5.41812	4.87332	5.32144	5.41562	5.60757	5.47619	4.70012	4.57091	4.6721	4.47232	5.31723	6.40015	6.08581
ENSDARG00000009733	kif21b	10.2699	10.0201	10.9323	10.8893	10.0871	10.2951	9.36239	10.2486	9.39978	9.90481	9.05124	9.13798	10.5094	10.4986	9.54343	10.027	10.5661	10.8354
ENSDARG00000009735	gigyf2	10.6316	10.2884	10.9097	10.705	10.3013	10.531	9.96513	9.73543	10.1792	10.2919	10.0118	9.72307	10.3226	10.5247	10.0071	10.1297	10.5513	10.5937
ENSDARG00000009738	cacnb4a	5.80615	6.68839	6.19508	6.41234	7.06081	7.43135	6.49424	6.49185	6.80868	5.9949	5.5375	5.89721	6.92294	5.49016	6.30933	6.05217	6.58776	5.85493
ENSDARG00000009740	ppp1r7	8.83625	8.44437	8.87161	8.76339	9.00249	8.27106	8.59315	8.4241	8.29335	8.49538	8.56655	8.68535	8.64591	8.52506	8.83535	8.94479	8.65643	9.02368
ENSDARG00000009743	efhc1	4.5984	4.34368	4.66405	3.65826	3.54397	3.63891	4.16941	3.53912	3.53582	4.14363	3.54858	4.78721	4.06504	4.66124	3.54212	4.93418	4.00275	3.90271
ENSDARG00000009745	fbxw2	7.65806	7.05743	9.21327	8.35773	7.69683	8.25095	8.2862	5.90507	7.93844	8.03787	7.79079	8.15559	7.97235	7.69868	7.91843	8.09339	7.87355	7.90936
ENSDARG00000009748	dffb	6.27204	6.28386	5.17972	6.27777	6.84091	6.24261	5.70315	5.87983	6.24264	5.49324	5.79028	6.8084	5.66911	5.92345	5.98377	6.15339	6.0388	6.12652
ENSDARG00000009753	sf3b6	9.73086	9.30736	9.4902	9.98612	10.1628	10.358	9.95667	10.5394	10.3522	9.44651	10.2307	10.8098	9.75343	9.94733	10.5054	9.83781	10.3805	10.2558
ENSDARG00000009754	zc3h11a	10.5139	10.6467	10.4514	10.6721	10.532	10.3149	10.5673	10.2793	9.38732	10.6014	10.2949	10.0115	10.4879	10.0734	10.3532	10.4786	10.3633	10.2534
ENSDARG00000009764	srek1	8.05184	8.50718	8.42976	8.60871	7.95016	7.78996	7.56711	8.33134	8.1929	8.5665	7.74034	7.85423	8.77811	7.68478	7.60702	8.61944	7.54256	7.1784
ENSDARG00000009771	ppme1	8.51105	8.06938	8.63748	9.37294	9.59046	9.756	8.84786	9.89211	9.59625	8.84126	8.93821	9.33915	9.79627	8.81488	9.26134	9.99208	9.19314	9.27809
ENSDARG00000009779	mcl1a	8.08874	9.90276	10.4439	9.73848	10.9796	10.2717	8.93103	11.3567	11.242	10.0021	12.2119	11.176	9.7989	11.254	11.3387	10.6071	11.6475	11.9425
ENSDARG00000009782	myh11a	6.83714	9.79885	10.1729	6.43428	8.31836	8.81684	10.7901	8.11588	9.68034	10.3708	7.88377	8.3815	10.1655	8.98124	8.35546	8.28044	9.08491	8.37818
ENSDARG00000009783	dirc2	7.48846	7.11596	8.08536	7.49869	9.16624	8.73007	7.36684	9.20963	8.90153	7.48586	8.89549	9.07163	8.11163	8.8646	9.00531	7.41603	8.7252	8.81863
ENSDARG00000009796	klc1a	8.12615	7.25963	8.09972	9.15713	9.04356	9.23333	8.34098	8.49228	8.79583	9.42604	8.54943	8.77834	10.0587	9.50961	9.25683	9.71587	8.73573	9.30542
ENSDARG00000009806	smfn	6.71477	7.08623	6.53091	6.57608	6.56307	5.33488	6.78798	6.62239	7.20959	5.97674	6.74003	6.61641	6.35326	6.32274	7.05418	6.70313	6.71267	6.6186
ENSDARG00000009822	her4.4	10.1541	7.8543	8.05634	12.1291	11.75	11.007	10.4308	8.95758	10.3612	10.0675	9.44672	9.00972	10.3254	8.06129	8.36683	10.3912	8.2899	8.42461
ENSDARG00000009823	pou3f1	10.4261	6.01722	2.53925	10.7598	8.4726	8.94652	10.1584	7.95299	8.78985	9.73974	7.06296	8.1728	10.5263	7.1602	8.08586	9.97234	7.0148	6.73156
ENSDARG00000009825	mmp23bb	5.53253	4.65459	4.22713	6.10232	6.76998	6.03652	6.72786	5.72231	5.91138	6.98474	6.30241	5.73404	6.7558	6.32326	6.25099	6.83385	5.33496	5.91538
ENSDARG00000009830	hdlbpa	13.7636	13.9308	13.7393	13.0301	14.1748	14.4067	13.7373	14.19	14.1738	13.4524	14.7393	14.8686	13.2692	14.6181	14.6047	13.5853	14.4146	14.5928
ENSDARG00000009837	agk	8.39653	8.7734	8.64341	8.12155	7.91554	8.41974	7.99909	7.46687	8.32081	8.28693	8.07199	8.42376	7.84391	7.97306	8.33903	8.47659	8.20501	8.07788
ENSDARG00000009839	fam117bb	7.7096	5.46859	6.2878	7.16164	6.69428	6.81303	7.70349	5.0719	8.06156	7.20734	4.57634	6.31454	7.23461	6.36402	7.00833	6.99319	7.10865	6.62921
ENSDARG00000009844	dusp23a	4.67202	3.75624	4.76904	4.44659	4.10074	3.75236	4.66357	4.8809	3.74727	3.76841	4.81914	3.76364	4.20042	4.31493	5.1471	4.08051	4.55319	4.81405
ENSDARG00000009851	wdr41	6.49715	7.31966	6.12085	7.38772	6.96281	6.6788	6.79894	6.83315	6.90007	6.65389	6.7375	7.0843	7.14627	7.36324	6.98994	7.36451	7.08827	7.34797
ENSDARG00000009862	dcps	8.69229	8.54175	8.31915	8.36148	6.55127	6.64885	7.75329	6.7569	8.72895	7.47094	7.73533	8.57898	7.88705	7.29454	7.48075	8.53176	7.93921	8.04048
ENSDARG00000009864	ddx55	7.19784	7.58024	7.15219	6.81123	6.58807	7.03236	7.43133	4.82056	6.07395	6.88711	6.30079	7.31005	6.69241	6.8747	6.8916	6.32158	6.64333	6.23158
ENSDARG00000009868	dcaf11	7.0518	7.93255	7.29091	8.7014	8.56155	8.59768	8.80925	9.14857	7.95825	9.43867	8.72895	9.20968	8.73658	8.72531	8.46652	8.49021	8.58201	8.30811
ENSDARG00000009870	mapk8b	7.80875	7.21937	8.37052	8.17584	7.53912	7.88608	7.82472	7.13712	7.95049	8.8279	7.87784	7.93492	8.21448	7.64806	7.3655	7.98225	7.85398	7.744
ENSDARG00000009871	snrpc	9.22043	8.49766	8.01886	9.05968	8.07816	7.63825	8.49375	7.05037	8.11791	8.23354	7.44948	7.63043	8.13129	7.38855	8.07805	8.1164	7.43971	8.12079
ENSDARG00000009874	cyp2k6	0.504427	0.503774	0.503569	0.504045	0.503761	0.50356	0.504553	0.503474	0.503281	0.702031	1.04634	0.504188	0.563664	0.503316	0.503651	0.504219	0.503392	0.50348
ENSDARG00000009881	ier5	9.34677	9.16796	9.43717	9.68473	9.91438	9.43026	9.07344	10.4406	9.84327	9.34741	9.74513	9.5372	10.3814	10.1907	10.1784	10.7364	10.2036	10.0129
ENSDARG00000009885	sult3st1	0.797259	0.796648	0.796456	0.796901	0.796635	1.06238	0.8954	0.796368	0.796188	0.797288	0.796893	0.797035	0.796356	0.955796	0.796533	1.12968	0.796291	0.796373
ENSDARG00000009886	rnf114	5.86913	5.61772	5.65234	5.84257	7.45885	6.31796	6.60334	6.31752	6.69209	7.52924	7.85805	8.01237	6.37583	7.41943	7.38806	5.31312	7.34558	7.41641
ENSDARG00000009899	znf385a	6.60734	5.5769	5.44785	6.07843	5.52734	5.82509	7.09414	4.95835	5.44299	7.27276	5.28358	4.08748	7.03625	6.25458	4.85863	6.74912	5.12332	5.21139
ENSDARG00000009901	slc38a5a	8.93065	11.1718	11.4742	8.14884	9.67624	9.42811	8.69566	9.1693	9.52693	9.48508	9.57619	8.37687	8.49475	8.78484	8.27025	8.46826	8.35611	8.9764
ENSDARG00000009922	dmbx1a	7.19364	4.81685	3.01692	8.63316	5.50683	6.51328	8.73391	6.50477	8.10611	8.76466	6.9563	8.12604	9.12295	6.96346	5.45849	8.34166	4.35742	6.70225
ENSDARG00000009930	cadm2a	5.76034	3.84272	3.80535	6.99099	5.62653	5.22029	5.94059	4.91123	5.73827	6.80199	6.24969	5.72348	7.92898	6.22535	6.20824	7.4257	4.95249	5.90452
ENSDARG00000009939	micu2	7.14264	8.69966	7.46363	7.57056	8.18002	8.01374	8.21805	8.40826	8.4004	8.31831	8.01263	7.82191	7.25482	7.47578	8.16708	7.32334	7.87119	7.73744
ENSDARG00000009941	erc1a	5.7358	3.29156	3.20184	7.43384	5.46107	6.10475	5.62013	6.21244	6.51825	7.56768	6.52269	5.84531	8.73406	5.99043	5.11316	8.69422	4.336	6.00991
ENSDARG00000009942	cdc6	9.89836	9.63721	9.58501	8.12383	7.79814	7.60116	8.31822	8.02223	6.9273	7.80048	7.52978	7.96025	7.7739	6.98468	6.7428	8.05204	7.62414	7.76944
ENSDARG00000009949	fndc4b	4.1696	3.70909	3.70256	4.59879	4.29574	3.7023	4.25642	5.09254	3.69325	5.34336	5.38396	4.74495	5.64112	4.35522	4.09778	5.5026	4.13395	4.12285
ENSDARG00000009950	edf1	7.19382	7.83287	7.84267	7.85797	9.12231	8.60599	6.83577	8.83873	9.10831	8.23055	9.67431	10.3488	7.9455	8.6451	9.17395	8.34184	8.9819	9.22365
ENSDARG00000009953	med14	10.9519	10.3748	10.3141	10.1968	9.70007	9.93047	9.61267	9.44058	9.89154	10.0859	9.4149	9.37979	10.0584	9.39685	9.71382	9.82464	9.55135	9.51794
ENSDARG00000009958	cbl	9.45357	9.80332	10.1947	9.78668	9.09827	9.36653	9.23524	8.90097	8.73214	9.34363	9.53351	9.24081	9.82534	10.1712	9.58969	9.54968	10.0874	10.1171
ENSDARG00000009961	rundc3b	3.41573	3.08307	3.08118	3.59538	3.08295	3.31402	3.33801	3.08031	3.07852	3.65648	3.44537	3.08685	4.17191	3.83535	3.11545	4.22786	3.1862	3.64495
ENSDARG00000009978	icn	6.46746	6.32697	3.03666	7.44767	7.5077	7.30078	8.21754	7.00959	8.48177	8.80568	9.83549	8.92747	5.47817	7.46864	8.15711	5.44354	7.27616	7.38736
ENSDARG00000009982	fam199x	9.81859	9.61726	8.95263	9.63204	9.57586	9.45459	9.06797	9.8077	8.49346	9.55197	9.2398	9.70309	9.97699	9.41895	9.51782	9.38348	9.44246	9.44498
ENSDARG00000010002	gna11a	9.55568	9.10108	8.47433	9.51634	9.10305	9.52683	9.40025	9.40181	9.48705	9.18197	9.15366	9.01499	9.76434	9.24966	9.05993	9.27755	9.46192	9.68301
ENSDARG00000010008	vim	8.45085	5.76576	4.65762	7.61482	6.72728	6.99242	8.7276	7.34876	7.17002	8.9995	8.14717	8.5653	8.60339	7.53768	8.03204	8.9032	7.90566	7.87337
ENSDARG00000010010	trim13	5.31446	5.21664	5.92466	6.18548	6.16379	6.11601	7.12656	7.66989	7.0661	6.62344	5.85855	6.25129	7.74085	7.27652	7.12104	6.9347	6.44646	6.42621
ENSDARG00000010018	qki2	9.0869	8.86357	9.26321	9.37905	10.717	11.0798	10.4614	10.1838	9.82618	9.48968	9.86108	10.345	10.167	10.7652	10.7245	10.119	10.9123	10.5263
ENSDARG00000010021	grpel1	8.06064	8.81639	8.79458	7.95118	8.64989	7.86474	8.38446	8.62796	8.56628	8.74685	8.68214	8.86778	7.97746	8.3164	8.82395	7.55544	8.54839	8.3857
ENSDARG00000010023		5.79872	4.38819	5.88977	6.57416	5.30783	4.86885	6.33544	5.2063	6.68545	6.19445	4.99094	4.71877	7.7113	5.19638	5.37038	7.40927	4.55329	3.92721
ENSDARG00000010029	spon1a	4.17018	3.5353	3.51644	6.30152	4.10822	3.95017	5.31204	3.50752	6.20556	6.04919	5.79854	3.57119	6.54317	4.71375	3.52407	6.5718	4.46146	4.8455
ENSDARG00000010031	ssh1b	7.14271	5.6232	6.61357	7.99431	6.78297	6.25881	6.84109	5.38208	6.88951	7.42225	5.84809	6.66752	8.35517	6.54914	6.13811	8.40455	6.0568	6.25461
ENSDARG00000010032	cmtm7	5.72838	6.95144	6.22401	4.70583	9.23014	9.51669	6.43347	8.99403	8.03564	4.6024	8.84438	9.80661	6.3921	7.8387	9.10259	5.56564	8.43031	8.88786
ENSDARG00000010035	engase	7.00646	8.45127	7.79627	6.9857	7.31489	7.43836	7.50825	7.20395	6.99105	6.80135	7.4588	7.87892	7.15083	7.44142	7.2772	7.1787	7.6128	7.9683
ENSDARG00000010042	dnm1a	8.07914	4.8269	6.47804	9.2619	7.56237	6.85622	8.62161	8.43373	8.91283	9.86644	8.16904	8.26283	10.9377	8.01419	7.5646	10.493	5.86803	7.13929
ENSDARG00000010047	neu3.2	5.81195	5.95295	3.97521	5.36325	5.24661	5.09154	6.83262	3.96797	3.95285	6.08079	6.02835	5.42585	4.61056	4.69702	6.0585	6.31061	5.41602	4.72137
ENSDARG00000010051	ufd1l	8.55125	8.53603	9.4108	8.57348	9.33821	9.14545	8.79042	9.17468	9.49305	8.25892	8.73172	9.62686	8.42912	8.76916	9.02247	8.62181	8.71855	9.03911
ENSDARG00000010052	ndrg3b	8.09378	9.04996	8.19434	8.31853	8.17254	8.40656	8.80563	8.6302	8.89167	8.51494	8.54126	7.84011	9.04017	8.41992	8.22214	8.83641	8.69559	7.95745
ENSDARG00000010059	itpkb	7.87935	8.65372	9.24987	6.50537	10.1745	10.3266	8.3604	9.72378	8.96592	8.20383	9.05532	9.75103	7.434	9.83573	10.0443	7.77543	9.36559	9.16006
ENSDARG00000010070	adam9	8.69045	8.79771	8.37031	8.53815	9.10695	9.35911	8.5779	9.13871	9.10824	8.98375	9.69704	9.23631	8.7488	9.5806	9.04853	8.42448	9.68597	9.72277
ENSDARG00000010075		2.98811	2.86587	2.86444	3.42876	3.47201	2.86438	3.81647	2.86378	2.86244	2.87059	2.86768	2.86873	3.07445	3.66412	3.31452	3.2533	2.86321	3.57337
ENSDARG00000010078	nup133	9.89363	9.96796	9.9357	9.25244	8.82543	8.5016	8.96482	9.2771	9.50425	8.33448	8.68674	8.54576	8.96574	8.39033	8.7225	9.35172	8.47892	8.55004
ENSDARG00000010083	rbfox3a	7.43574	5.22466	3.78679	9.2928	7.60915	8.6323	8.191	7.17359	7.23498	8.79126	7.66593	5.80362	9.84267	7.50055	7.29127	9.52655	7.30371	7.41047
ENSDARG00000010085	p4ha2	8.53094	7.62086	7.0701	7.67938	7.99107	7.54147	8.59937	7.53635	7.58475	8.37163	7.81002	7.48665	8.20116	7.69994	7.37631	8.21813	7.77756	7.48117
ENSDARG00000010096	slc1a6	3.86106	3.35069	3.34394	4.72343	3.35025	3.64306	5.07387	3.34079	3.33427	4.77987	3.3591	3.85303	5.72011	4.40693	4.07109	5.199	3.63233	3.64363
ENSDARG00000010097	f9a	-0.515969	-0.52003	-0.52009	-0.51995	-0.328174	-0.520093	-0.514601	-0.520118	-0.520175	-0.515621	-0.519953	-0.518886	-0.520122	-0.439984	-0.520066	-0.518479	-0.520142	-0.503652
ENSDARG00000010098	pank1b	8.73365	8.85666	8.65276	9.3836	9.28002	9.3738	8.90271	9.07171	9.38467	9.36969	8.7519	8.78953	9.07061	9.04915	9.11283	8.91584	9.05728	8.73021
ENSDARG00000010108	bri3bp	6.93599	6.55403	6.43746	7.77191	7.44859	7.28087	7.51031	7.06277	7.02871	7.26479	7.28641	7.70487	7.75573	6.76366	7.22601	7.34275	6.951	7.0928
ENSDARG00000010113	ndufb8	8.92652	9.231	8.67458	9.1515	10.272	9.94612	9.48305	10.2265	9.87445	9.78918	10.6483	10.4657	9.06147	9.5438	9.6203	9.49788	9.86653	9.819
ENSDARG00000010130	smpdl3b	4.11964	3.52362	4.94842	3.5304	4.65948	5.57132	4.54218	4.20689	3.51094	3.54053	3.53017	3.53394	4.68061	4.21199	3.52049	3.96799	5.06783	4.31844
ENSDARG00000010132	dacha	8.94369	7.90077	8.60739	9.38545	8.98636	8.26498	9.3299	8.98746	8.84764	9.43706	8.32423	7.47784	9.62338	7.89291	7.53466	9.82736	8.93695	8.09962
ENSDARG00000010137	ldb1a	10.9553	10.0364	10.2311	11.5351	10.2562	10.852	10.9271	9.77677	10.2345	10.7814	10.0322	9.84173	11.1605	9.61034	10.1111	10.9479	9.68367	9.85637
ENSDARG00000010144	plppr3a	9.58989	8.47565	8.23619	10.6594	8.30376	8.68532	9.22943	8.34938	8.53244	9.60007	7.62215	6.99177	10.1099	7.13674	7.10985	9.91316	7.4316	7.10573
ENSDARG00000010145	tor4aa	6.86697	7.47005	7.66327	7.12121	5.7948	6.93684	7.06288	7.22298	5.40605	7.33112	6.2805	6.58908	6.40002	6.49908	4.60242	7.32028	5.69084	6.99956
ENSDARG00000010146	cpa2	-1.81881	-1.82076	-1.82168	-1.81983	-1.82081	-1.82172	-1.81853	-1.8222	-1.82288	-1.81874	-1.81985	-1.81941	-1.79448	-1.82288	-1.82128	-1.81933	-1.82271	-1.82216
ENSDARG00000010149	atp5fa1	12.836	12.8852	12.6331	12.4063	12.9167	13.0163	12.7654	13.2418	13.2981	12.6591	13.5836	13.0287	12.6663	13.4162	13.3087	12.898	13.1602	13.331
ENSDARG00000010154	vstm4a	5.48668	7.10159	6.77189	6.69424	5.91926	5.43675	7.6358	6.02098	6.70441	6.96934	5.55618	6.00967	6.88224	5.76875	5.37191	7.15325	5.66609	5.34873
ENSDARG00000010155	abi1a	9.24614	9.47131	9.47418	8.96822	8.7282	8.688	9.23033	8.20725	9.02513	9.29354	9.06443	8.28824	9.0638	8.83638	8.76499	9.25981	9.23013	9.54729
ENSDARG00000010160	rps15a	9.74275	9.94469	10.2312	9.04014	10.5084	9.96087	10.575	10.3674	9.15193	10.0085	10.6123	11.1556	10.2359	11.2931	10.9573	11.2498	11.6059	11.2065
ENSDARG00000010169	myd88	7.60172	8.69823	8.65288	8.19702	8.94721	7.72327	8.04155	9.26821	9.15377	8.50263	9.26023	7.83758	7.41339	8.5838	9.15805	8.04256	8.99966	9.1624
ENSDARG00000010181	asap2a	9.93621	9.54288	9.73894	10.2336	8.78235	8.78258	9.42794	9.42986	8.73267	9.60763	8.97676	7.74171	9.48818	8.61494	8.36893	9.15743	8.22456	8.43915
ENSDARG00000010183	si:ch73-265h17.1	5.00578	4.22004	6.20071	5.2527	5.77812	5.92453	5.99291	4.19797	4.21757	6.10587	6.21155	6.4049	5.55118	6.12964	6.27088	5.67278	6.21984	5.99136
ENSDARG00000010186	myo3a	7.00743	3.59564	3.48665	8.3234	7.26826	7.59663	8.25672	7.0626	7.9348	7.85433	7.06371	6.79495	8.03293	6.39575	6.60897	8.09317	7.78141	7.79876
ENSDARG00000010192	pax3a	10.3251	8.18137	6.30598	9.10643	7.22168	8.27582	8.65603	6.9415	7.07644	8.34308	7.9693	7.86346	8.62877	7.60984	7.76443	8.04371	7.36265	6.9814
ENSDARG00000010194	eif4bb	11.2734	11.3489	11.8225	10.3424	10.6529	10.4586	10.1044	10.3964	10.6664	10.1841	10.4398	10.79	10.009	10.7968	10.7038	10.7995	10.7754	11.0187
ENSDARG00000010207	smad3b	7.92885	6.19213	5.3995	7.72021	7.17882	7.5105	7.56742	7.0724	7.90339	7.38525	5.82382	6.98457	7.3919	7.23373	7.03514	7.26185	7.28621	7.013
ENSDARG00000010231	ppm1na	2.61432	2.59934	2.59438	3.15601	2.59901	2.59418	3.98875	3.34947	4.38565	3.99755	2.60547	2.60896	3.30632	2.58812	2.59638	2.60966	2.97329	2.64031
ENSDARG00000010238	rbm22	8.83851	8.93983	8.43225	8.43856	7.99649	8.33823	8.4371	8.51736	8.38081	8.08111	7.86183	8.37853	8.43899	7.82004	8.80882	8.44374	8.08374	7.92887
ENSDARG00000010244	rpl22l1	10.9066	11.117	9.64542	9.98828	11.3651	10.5822	10.6136	10.4491	9.93317	10.5427	10.9507	11.2435	9.75113	10.3108	10.2959	8.90463	10.3243	9.90653
ENSDARG00000010246	prmt1	12.3791	12.2938	11.7748	10.9557	10.7909	10.6767	11.1258	10.5275	11.0082	10.2732	10.313	10.4608	10.8588	10.5691	11.0673	11.2706	10.515	11.0222
ENSDARG00000010248	wdr54	5.50004	5.20209	4.16309	5.35268	5.68173	5.56245	5.85398	7.14615	4.14484	5.32779	5.41832	5.99888	6.46714	5.22386	5.7021	5.95904	5.21122	5.33972
ENSDARG00000010250	nqo1	7.92803	6.00315	6.75796	7.39553	7.72498	7.68381	8.37894	8.10493	8.61595	7.98381	9.1363	8.73158	6.72401	8.35017	8.64872	5.65379	7.65084	7.61455
ENSDARG00000010252	jak3	4.30407	3.84623	3.56171	5.08763	5.30077	4.38822	4.22615	6.35617	6.0582	3.7171	7.30142	5.63947	5.55232	7.07732	6.91677	5.55576	6.96415	7.49551
ENSDARG00000010255	bin2b	8.02351	8.11215	8.98837	6.14887	7.13918	7.27143	6.6571	8.31997	7.45467	5.42778	8.62275	7.98552	6.6163	8.82035	8.20339	6.77372	8.90035	9.39417
ENSDARG00000010266	igf2bp3	12.2595	11.9119	11.5883	11.4153	11.5247	11.6726	11.5325	10.9022	10.6991	11.5034	11.0291	11.0145	11.2862	11.206	11.2829	11.7204	11.4466	11.4932
ENSDARG00000010267	dpydb	6.29473	4.84142	5.50494	6.60313	6.89313	5.10837	6.64137	8.56794	8.53707	7.26188	8.28623	6.26848	6.47417	10.0136	8.4705	5.55909	8.1482	7.8094
ENSDARG00000010270	fezf1	5.66249	3.93193	3.9263	5.97818	4.3884	4.34877	5.59607	3.9237	4.755	5.34366	4.77382	4.59286	5.64272	4.75135	4.60676	5.24308	4.14984	3.98808
ENSDARG00000010276	ptgs2b	5.27156	3.94853	4.44003	4.77632	5.0596	4.31286	4.76661	5.53733	6.64754	4.79501	7.35018	5.1861	5.56009	5.5617	5.65566	5.84503	6.10885	5.95639
ENSDARG00000010279	scamp2	8.8566	9.78678	9.35781	8.92651	10.391	10.3858	8.90721	10.2919	10.7115	8.46417	10.4376	10.0823	8.71646	10.2917	10.2815	8.91592	10.3199	10.6505
ENSDARG00000010280	clasp1a	10.258	10.9093	10.8756	10.9208	10.3102	10.0966	10.4271	9.87809	9.3479	9.83283	9.78909	9.0018	10.7732	10.209	9.7598	10.2404	9.73467	9.51167
ENSDARG00000010281	xpo4	9.52202	9.41536	9.15835	8.40356	8.72989	8.31298	8.34198	8.39654	8.13905	8.67353	8.60539	8.58116	8.47528	8.28436	8.75241	8.63419	8.51951	8.08822
ENSDARG00000010294	fmodb	4.58062	3.93852	3.92501	5.74086	3.93765	5.23176	6.85964	5.49698	3.90548	5.67077	5.92525	4.66206	5.72025	5.9606	5.29239	5.87214	4.82908	5.4085
ENSDARG00000010296	kcnh6b	3.69365	3.4975	3.16964	3.13518	4.97383	4.32722	3.48579	3.12319	3.11903	3.1436	3.13499	3.13812	4.82648	4.79805	3.7832	3.13876	3.38115	3.63403
ENSDARG00000010300	traf3ip1	6.51639	6.00782	6.3367	6.42226	6.56205	6.41785	6.9565	6.38688	6.03535	6.33275	5.91013	5.55741	6.73243	6.33105	6.39807	6.52996	6.55092	6.0552
ENSDARG00000010301	b4galt6	9.62156	9.41998	10.1697	9.86859	9.14395	9.1307	9.14205	8.83469	9.30353	9.64521	8.82522	9.45031	9.88626	9.1413	9.05052	10.1918	9.63564	9.67247
ENSDARG00000010312	cp	4.59715	5.03	5.44149	6.41508	6.56749	6.69259	6.33274	8.54772	7.48142	7.10184	7.77024	7.81031	5.91724	10.1147	8.53869	6.89301	8.75815	9.30836
ENSDARG00000010316	qars	9.81445	10.2684	9.83063	9.46437	9.69981	10.0027	9.43796	9.62316	9.73092	8.69961	9.6042	9.59294	9.23815	9.70375	9.76668	9.01827	10.1526	10.0498
ENSDARG00000010317	gpr183a	4.45162	5.97164	5.74151	3.7984	6.0227	4.39663	4.80335	6.3692	6.45424	3.84724	6.04573	4.86808	4.39672	6.69619	5.80635	3.81956	7.23446	7.04038
ENSDARG00000010318	srpx	7.92776	7.8914	7.15197	7.07568	5.58885	6.03133	8.75127	7.46128	8.17512	8.99492	7.80653	7.45634	8.42136	6.2768	6.44195	8.73437	6.80889	6.11277
ENSDARG00000010331	si:ch211-26b3.2	7.95527	7.8577	8.5122	6.63734	6.84258	7.00257	7.8654	7.27338	6.67231	7.25605	6.9196	6.58872	6.99461	6.34752	7.24592	6.30672	6.46321	7.32556
ENSDARG00000010332	zgc:56231	5.19975	4.39828	5.08067	4.06256	5.0118	4.35757	4.49086	5.78931	6.59682	5.31045	5.20838	4.83321	5.19304	5.92475	6.77545	5.54073	5.76368	5.73075
ENSDARG00000010347	acer1	1.64736	1.64587	1.6454	1.64648	1.64584	1.64538	1.85866	1.64518	1.64474	1.64743	1.64646	2.33629	1.64515	2.01699	1.64559	1.9621	1.645	1.8545
ENSDARG00000010350	c1ql3a	4.19039	3.84435	4.75903	4.99388	5.18757	4.65998	4.58072	3.83715	3.83247	4.80447	4.41017	3.85408	5.27833	3.85727	4.99178	5.30244	4.98501	4.38788
ENSDARG00000010376	slc5a3a	-0.325938	-0.511134	-0.511204	-0.511043	-0.511139	-0.511206	-0.505384	-0.511235	-0.5113	-0.506477	-0.511046	-0.509976	-0.414186	-0.511289	-0.511176	-0.509539	-0.49621	-0.493651
ENSDARG00000010381	rnf2	8.54951	8.25864	7.89317	8.80161	8.54904	8.21535	8.52165	8.40647	7.90751	8.97999	8.16479	8.78661	8.82594	8.26183	8.55874	9.01823	8.3726	8.10569
ENSDARG00000010384	lpar5a	4.4376	6.15688	4.94588	3.94302	4.80003	3.91081	4.6725	5.91678	3.89117	4.58164	5.29417	5.65688	4.91141	5.80669	6.23797	4.75833	6.31832	6.41271
ENSDARG00000010385	sept4a	5.06648	3.76537	3.71637	7.57462	6.26988	6.53739	7.02594	5.69203	7.59936	7.39987	6.64505	5.97986	7.20889	5.76462	5.53305	7.20877	4.90734	4.65368
ENSDARG00000010400	lrrfip2	7.98491	7.74013	8.64661	8.33469	8.58335	8.39334	7.79763	8.64839	8.61936	8.50123	7.8067	8.60868	7.96212	8.1965	8.71372	8.19977	8.31363	8.57259
ENSDARG00000010407	ppp4r4	3.31396	3.2948	3.28854	4.10457	3.84076	3.28828	3.76225	3.28562	4.00038	4.88169	4.64913	3.30706	5.27452	4.41284	3.29106	5.60887	3.86416	3.51916
ENSDARG00000010408	igsf9b	10.6779	9.11546	9.37283	11.7294	9.07064	9.70422	10.2809	7.91493	9.69609	10.4332	9.49734	9.22814	10.391	8.55399	7.54934	9.44821	8.84908	8.1939
ENSDARG00000010411	epn1	10.2191	11.472	11.8949	10.262	10.2172	10.2286	9.40649	10.2129	9.72392	9.86406	10.2087	9.31305	9.81527	9.89731	9.97467	10.1578	9.99169	10.2722
ENSDARG00000010415	sirt4	4.17843	4.73032	4.01049	5.29286	5.4166	5.10444	5.30983	5.37818	4.00296	4.91042	5.16629	4.44444	4.48909	4.78229	5.06131	4.02713	5.17452	4.73095
ENSDARG00000010420	ndrg1b	3.3382	3.0288	2.89417	8.14659	6.56652	6.12151	7.27449	6.53095	2.64657	9.22213	7.62257	8.35756	8.04313	6.04273	6.1244	8.28229	6.35319	6.80572
ENSDARG00000010423	npsn	5.52721	9.87883	11.174	8.48607	5.20918	4.78325	7.96981	5.74407	7.35614	9.29014	8.33737	6.37406	8.75441	5.86795	6.14336	9.04945	6.55905	5.77329
ENSDARG00000010425	scara5	5.04095	5.99644	5.88549	6.25168	4.93005	5.90524	6.75717	5.12761	6.53006	6.54529	4.7965	5.79351	6.56402	5.6805	4.76454	6.43165	6.10864	5.78896
ENSDARG00000010432	eaf2	8.01096	7.43521	8.05018	7.56553	8.17228	7.78668	7.81924	8.18626	7.51262	7.90162	8.59482	7.74339	7.10687	7.74911	8.05935	6.28347	7.74253	7.749
ENSDARG00000010434	clu	5.31501	3.50312	3.42992	6.03686	5.55528	3.57113	7.47608	7.57617	6.09864	8.22777	6.67629	7.12938	6.91165	5.39811	5.84959	8.1847	6.86134	5.98307
ENSDARG00000010437	tent5c	6.60459	7.94715	8.25536	7.16952	5.3968	5.88464	5.44586	3.55702	7.0503	6.36488	6.17754	4.31385	6.56046	5.07174	4.97272	5.01319	5.39302	5.44993
ENSDARG00000010442	rnf11a	5.95986	5.92049	6.28737	6.16222	6.52082	6.49855	6.66289	7.45804	6.5647	6.39267	7.52115	7.93508	6.70112	7.42501	7.10987	5.78037	6.54113	6.62478
ENSDARG00000010445	trabd	8.33531	8.55548	8.26678	7.44629	8.49144	8.34276	8.08068	8.55783	8.3586	8.10011	7.98164	8.54956	7.32317	8.20552	8.49054	7.4602	8.15243	8.52838
ENSDARG00000010454	guca1a	2.77831	1.9665	2.96181	1.96759	2.1053	1.96564	2.26433	1.96529	1.96451	1.96924	1.96755	1.96816	2.14442	1.96465	1.966	1.96828	2.0291	2.14946
ENSDARG00000010472	atp1a2a	6.79975	5.30056	3.99959	6.4673	6.91547	6.54682	6.64578	5.65017	8.03985	5.38897	6.59204	6.32142	6.66211	7.6266	6.68197	6.52705	7.26353	7.04899
ENSDARG00000010477	p2rx3a	2.75966	2.68039	2.67852	2.7392	2.68026	2.83429	3.86274	2.67766	2.94985	2.68651	2.68274	2.6841	3.32606	2.67621	3.67363	3.94515	3.1653	2.67771
ENSDARG00000010478	hsp90aa1.1	9.03544	6.99545	8.55558	6.99015	7.95363	6.90283	8.81138	6.72856	8.85732	7.0961	7.71336	6.88401	8.54874	8.30212	5.64251	8.17444	8.03396	7.63993
ENSDARG00000010481	bzw1a	11.8456	12.0529	11.4285	11.1853	11.5625	11.3309	11.0498	11.1447	11.2661	10.7234	11.3272	11.6332	11.0384	10.8802	11.6043	11.1837	11.136	11.4586
ENSDARG00000010482	prg4a	4.25839	3.55283	3.55048	4.19969	3.5886	4.00192	4.26774	4.2395	3.54719	4.4457	3.55581	4.23014	3.93389	4.72225	3.55142	4.21626	3.64983	4.38499
ENSDARG00000010487	sae1	10.0434	9.53709	9.76972	9.65954	8.58869	8.6255	9.02796	8.05325	8.64282	7.9222	8.25422	6.81802	8.90977	8.10074	8.38913	9.16761	8.0851	8.3459
ENSDARG00000010514	cxcr5	3.73404	3.63982	3.63845	4.30742	4.0915	4.00472	3.95324	4.553	4.54805	4.04116	3.64156	3.64258	4.19714	4.19687	3.639	4.12421	3.90054	4.05667
ENSDARG00000010515	dvl1a	6.0259	6.06176	6.77881	6.74654	6.27236	6.99415	6.35809	6.32605	7.09188	6.43847	6.68081	6.68154	7.48769	7.39426	6.32775	7.01995	7.22044	7.08428
ENSDARG00000010516	rpl21	9.78108	10.214	10.4791	9.53874	10.4515	10.3498	10.4216	10.2428	10.0378	10.6471	10.5625	11.2014	10.0232	10.6079	10.0171	11.1887	10.423	11.3534
ENSDARG00000010519	per3	11.331	11.4213	11.8807	11.4178	11.7363	12.0755	11.7405	12.4345	12.28	11.6949	11.6987	12.257	11.9762	12.2661	12.0127	11.6427	12.0886	12.0605
ENSDARG00000010524	si:ch211-282j22.3	9.34738	9.35859	9.48274	8.82152	9.36188	9.3636	9.29182	9.18186	9.23939	8.99662	8.80763	8.75964	8.85944	8.98048	8.65777	8.65272	9.10113	9.05296
ENSDARG00000010531	scamp4	9.51278	10.2548	10.9603	8.19129	10.5105	10.4531	9.28796	10.6431	10.0101	8.40518	10.6812	11.1719	8.01554	10.6649	10.8603	8.33763	10.5344	11.2264
ENSDARG00000010553	mmgt1	8.74028	9.06807	8.92084	9.03552	9.17125	9.06088	8.57224	8.6973	8.55719	8.54233	8.73465	8.69617	8.72717	7.85535	8.64722	8.48575	8.76868	8.8451
ENSDARG00000010555	pdha1b	2.19714	2.19496	2.19428	2.44613	2.19492	2.19425	2.95758	2.19396	2.19331	2.19725	2.50295	2.19634	2.63413	2.36419	2.19455	2.2879	2.39048	2.60704
ENSDARG00000010556	mmp25b	6.97593	7.2551	7.2371	5.63663	6.06231	6.02007	6.22059	6.16044	4.12027	6.83815	5.73049	4.24252	6.33024	6.3857	6.4694	6.2655	6.28215	6.19992
ENSDARG00000010563	spoplb	8.81723	8.90011	8.00569	8.31768	9.22095	9.17139	8.3013	8.47726	8.23668	8.316	8.16206	8.66663	8.36403	8.71289	8.92789	7.20167	8.21669	8.00585
ENSDARG00000010563	spopla	8.81723	8.90011	8.00569	8.31768	9.22095	9.17139	8.3013	8.47726	8.23668	8.316	8.16206	8.66663	8.36403	8.71289	8.92789	7.20167	8.21669	8.00585
ENSDARG00000010565	aqp4	3.91644	3.49559	3.49227	3.86688	3.78913	3.72941	4.68472	4.24165	4.21953	3.50644	3.74642	3.50219	4.53328	5.06075	4.49258	4.41423	3.84242	3.49083
ENSDARG00000010571	ezh2	10.8669	10.9252	11.1934	10.7236	9.75874	9.86056	10.1623	8.8139	9.69285	9.73833	8.82167	9.1885	9.8882	9.22427	9.44765	9.77231	9.27751	9.60764
ENSDARG00000010572	slc25a25a	7.84505	9.5293	9.38994	7.53126	9.29709	8.19406	6.93972	9.25789	8.87087	7.94156	9.19396	7.64491	7.83387	9.94294	9.00573	8.55492	9.52856	9.81333
ENSDARG00000010583	pard3ab	10.4274	9.83562	9.72815	10.1941	9.64154	10.0129	10.2835	9.02833	9.62895	10.3933	9.46501	9.15976	9.9612	9.46773	9.14123	9.94222	9.52072	8.65091
ENSDARG00000010586	tex9	3.61396	3.60341	3.60003	4.5141	4.64355	3.97027	4.6901	3.59847	4.62932	4.94015	4.38545	3.61012	4.41845	3.59585	4.31414	4.12318	3.59711	4.61181
ENSDARG00000010591	foxn4	7.5322	6.9842	3.39354	9.25302	6.85565	7.38351	8.00405	6.68312	8.05371	8.5012	7.03865	7.5367	8.05041	6.09771	5.79331	7.3681	7.03708	5.92294
ENSDARG00000010596	slc7a6os	6.61467	6.50931	6.6844	7.02163	5.27106	6.80011	7.18621	6.42118	4.2048	6.69147	5.61091	6.48864	7.00102	6.48209	6.43011	6.34138	6.94967	5.81553
ENSDARG00000010601	mtmr10	7.38145	5.53739	7.73611	7.79588	7.91759	7.8702	8.26921	6.83372	8.40295	8.16342	8.32077	7.21953	7.87002	7.69058	6.2844	7.44962	7.92844	7.71186
ENSDARG00000010602	zgc:112294	2.86971	2.86152	2.85889	4.19528	2.86135	2.85878	3.48534	2.85768	2.85518	4.58767	3.52772	2.86673	3.49979	2.88021	2.85994	3.35209	3.22193	3.49855
ENSDARG00000010603	kctd9b	7.26534	6.94996	6.89141	7.46106	7.44266	7.42093	7.17376	7.92167	5.8406	6.7335	7.21252	8.1883	7.0819	7.55489	6.42711	6.49493	7.52681	6.98012
ENSDARG00000010610	sarm1	6.24382	5.33932	5.34515	8.29743	6.22711	6.69628	7.26103	7.29685	3.59263	6.721	6.94619	5.14926	8.26626	6.60131	6.38001	7.28376	5.56202	5.9999
ENSDARG00000010619	themis	3.57688	3.71007	4.27281	4.65546	3.73844	3.31902	3.59516	3.31714	3.31289	5.25585	3.51717	4.44048	4.86621	3.76388	3.32098	4.45568	3.31534	3.31726
ENSDARG00000010625	clic2	6.71107	9.70461	9.39886	8.07052	9.55391	8.37933	8.0869	8.92953	8.83405	9.36148	9.92498	8.45297	7.40927	9.70686	9.59255	7.10531	10.2676	10.0988
ENSDARG00000010630	hoxb6a	6.74527	6.43769	6.08097	6.99891	6.52755	6.64134	6.91376	6.50055	7.58649	7.46045	6.85065	7.39923	7.39109	7.04721	5.95559	7.60767	6.12511	5.85773
ENSDARG00000010641	slc20a1b	11.5016	11.6729	11.8318	10.5271	11.2269	10.9332	10.448	10.9185	11.0617	11.1528	11.5575	11.4113	10.6821	11.6941	11.6671	11.0254	12.1359	12.2443
ENSDARG00000010654	arhgap42b	5.09189	6.24601	5.86597	5.70204	5.94016	6.56711	6.72184	5.31117	4.79313	4.90319	5.32933	5.08655	5.47188	6.20181	5.07473	5.55263	6.17081	5.88384
ENSDARG00000010655	ppm1k	7.98133	8.19174	9.41411	8.33856	8.7334	8.54219	8.69795	9.54171	9.09341	8.86891	8.34422	8.19117	8.77276	8.51971	8.5463	8.61583	8.29866	8.41082
ENSDARG00000010658	insig1	6.14358	7.80533	8.02298	7.95157	7.46862	7.40886	7.34959	7.42539	8.19477	9.01514	8.9024	8.44308	9.0956	8.34697	8.44507	8.69878	8.50664	7.61233
ENSDARG00000010662	fbxo36a	2.80997	2.31826	3.11814	2.31945	3.00481	2.31731	2.32169	2.31693	2.31607	2.32127	2.95213	2.32008	2.65278	2.31622	2.31771	2.32022	2.53124	2.31695
ENSDARG00000010673	trim16	5.95742	6.00913	6.56905	6.18216	7.30605	7.00063	6.30856	7.00514	7.80592	7.40497	6.36982	7.40437	5.72284	7.30945	6.96973	5.59193	6.71628	6.56657
ENSDARG00000010680	gngt2a	3.6998	3.63671	3.61484	5.71741	4.4899	3.83455	7.30152	6.09928	5.51893	6.25551	4.97869	5.3214	6.13552	4.47457	3.62372	5.7787	4.77512	5.17042
ENSDARG00000010681	tjap1	9.18194	8.10212	8.01936	8.46949	8.47185	8.35864	8.99593	8.32011	8.04699	9.00384	8.20678	8.73828	8.86849	9.1886	8.63854	8.90815	9.05568	8.89831
ENSDARG00000010700	il17d	3.54682	3.41852	2.95746	3.34542	2.9582	3.10693	2.96123	2.9571	2.95636	3.53461	3.11695	2.95983	3.22566	2.95649	2.95778	3.23337	3.254	3.51253
ENSDARG00000010710	msi1	9.71835	7.01479	5.38177	8.98172	7.05669	7.59762	8.97626	7.62751	8.4893	8.89214	7.12294	7.04187	8.5393	6.96736	7.66011	8.32389	7.1865	6.64931
ENSDARG00000010712	npffr1l3	2.23955	1.84595	1.84526	2.1255	1.84591	1.87292	1.84857	1.84494	1.84429	1.84825	2.85952	1.84734	2.05436	2.18901	1.84554	1.9006	1.84466	1.86946
ENSDARG00000010717	chchd10	7.32246	8.05345	7.78819	6.96672	8.11815	7.83412	8.00762	8.6958	8.55634	7.69958	7.92138	8.10156	7.24078	8.22329	8.42699	7.41687	8.16148	7.82274
ENSDARG00000010721	2006-09-01	10.6185	11.1263	11.1672	10.4789	10.6783	10.7588	10.4595	10.9895	10.1798	10.1572	10.8465	11.3308	10.6444	10.5548	10.8065	10.6565	10.535	10.8889
ENSDARG00000010727	ttyh2l	6.40513	7.32965	7.34104	7.18073	9.14201	8.79269	7.11017	9.13337	8.74116	7.87793	8.39304	9.14528	7.79919	8.34258	8.28271	7.2676	8.31851	8.30811
ENSDARG00000010728	scin	4.22748	4.59841	5.05732	4.55877	4.13791	4.57293	5.25194	3.89752	5.7817	5.29292	5.44641	3.91978	5.02969	4.12719	4.88704	5.64555	4.39884	4.27533
ENSDARG00000010729		0.890251	0.642579	0.642403	1.01135	0.642568	0.684229	0.643246	0.642323	0.642158	0.643165	0.642803	0.642933	0.678235	0.655888	0.642474	0.64296	0.674016	0.67935
ENSDARG00000010732	xrcc4	6.26706	6.7506	5.31639	6.36784	6.53446	6.42504	5.93851	6.67874	6.57032	5.70946	5.43601	6.82205	6.16778	6.50502	6.84414	6.25235	6.47368	5.73298
ENSDARG00000010738	zgc:101716	4.97049	5.23333	3.92925	4.54264	4.42819	4.79312	4.39536	4.49432	3.92406	3.94502	4.48718	4.56799	4.40023	4.90295	4.56134	4.86317	4.99335	4.6014
ENSDARG00000010745	dnaja2l	9.97737	9.12832	7.54176	10.3988	9.95777	10.2114	9.82822	9.90771	9.78561	9.60836	10.0339	10.1245	10.2205	9.98705	10.0672	10.0061	9.89235	9.61915
ENSDARG00000010752	acsl4b	6.61886	7.04984	8.17872	6.47151	7.11512	6.49688	6.96037	8.29821	8.54316	7.91791	8.06237	7.26201	7.51617	8.31957	7.64461	7.40933	8.76072	8.75318
ENSDARG00000010756	nod2	5.71807	5.84193	6.8518	4.65941	6.31054	5.41568	6.2603	7.09366	6.37845	5.76291	6.45398	6.54185	5.98871	6.49333	6.44581	5.80081	6.1158	5.6733
ENSDARG00000010758	capn12	7.39193	7.69414	8.35515	8.17372	6.68966	6.9523	9.95243	6.93297	7.34771	8.20908	7.75581	6.36883	7.90256	6.63363	3.22013	8.38212	7.0958	5.76157
ENSDARG00000010764	flj13639	3.60612	4.20455	3.59389	3.83078	4.236	3.98482	3.96816	4.72598	3.58973	3.60656	3.60058	3.60275	4.64549	4.35089	4.50723	4.64445	4.4681	4.52131
ENSDARG00000010767	epha4l	9.74657	10.3349	10.1298	8.96383	8.98095	8.49429	8.72964	7.5312	7.29019	8.81154	7.77198	6.54712	8.60102	7.82665	7.17819	8.10427	7.64729	6.64858
ENSDARG00000010770	sox19a	11.0613	7.46713	6.34959	9.55581	7.84466	7.6554	9.62931	7.51354	8.97027	8.38096	7.18519	7.63154	8.99129	7.14629	7.31465	8.5835	6.33016	6.99482
ENSDARG00000010773	pnpla6	8.45535	8.97629	9.2544	9.44851	9.80439	10.0284	8.48622	8.43936	9.35567	8.86937	9.31569	9.12216	9.36007	8.96291	8.7134	9.05746	9.13713	8.76653
ENSDARG00000010779	tlk2	10.624	10.062	10.5049	10.2656	9.57488	10.0496	10.0612	9.28304	8.57742	9.97004	9.78916	10.0005	10.1786	9.78253	10.1132	10.0167	9.86882	9.93949
ENSDARG00000010782	zgc:55621	-1.50635	-1.50928	-1.51066	-1.50787	-1.50936	-1.51072	-1.50593	-1.51131	-1.51133	-1.50624	-1.50792	-1.50725	-1.463	-1.51133	-1.51007	-1.50713	-1.51132	-1.50106
ENSDARG00000010784	ppp1r12a	10.4609	10.2587	10.887	10.244	10.673	10.6739	10.1972	10.5966	9.77208	10.6334	10.1309	10.3428	10.6669	10.6665	10.3344	10.8678	10.8178	10.7296
ENSDARG00000010785	thbs1b	10.9895	10.6865	10.2446	11.099	10.4276	10.8811	12.0868	10.9794	12.3151	13.0936	11.5123	10.3004	12.2945	11.095	10.735	12.9201	10.8545	9.81447
ENSDARG00000010789	homer3b	8.99795	8.51534	8.3516	9.08171	9.26147	9.69226	8.74325	9.88248	9.62212	8.79344	9.70787	10.3601	8.8822	9.39477	9.95895	9.33328	9.36238	9.91114
ENSDARG00000010791	dla	10.4615	6.8712	6.69824	10.1693	8.68877	8.66422	9.34623	7.68474	8.45494	9.34247	8.41748	7.88582	9.34204	7.36543	8.45223	8.97919	6.76916	7.00509
ENSDARG00000010792	cdc25b	11.4799	10.7583	11.5615	10.4632	9.1625	9.36714	10.246	9.52379	9.56317	9.51038	9.69074	9.20792	9.61594	9.49636	9.83608	9.41053	9.83987	9.88215
ENSDARG00000010794	tfeb	6.65841	5.98654	7.73799	6.4906	8.76857	8.81341	8.37959	9.156	7.3387	7.59221	9.05089	8.56904	6.77088	9.19662	8.59287	5.59244	9.21965	8.86005
ENSDARG00000010816	slc7a14a	6.8403	3.01023	2.88739	8.05411	5.00997	6.43139	7.62942	2.82225	7.44517	8.60111	6.58218	3.86092	8.89746	6.42729	5.3816	8.1764	4.98127	5.93703
ENSDARG00000010823	memo1	8.25582	8.43545	8.20021	8.50419	8.48024	8.75892	8.62789	7.20866	8.50091	8.38557	8.3331	8.26697	8.63233	8.03551	8.07648	7.49538	8.46836	8.3274
ENSDARG00000010831	churc1	7.57962	7.81571	7.04142	7.29324	8.32101	8.01056	7.15634	8.88745	5.90429	7.39963	7.25453	7.94319	7.08668	7.61872	7.82686	7.46765	8.19964	8.20956
ENSDARG00000010844	kras	9.37681	9.31805	9.16189	9.81183	10.2171	10.846	9.90886	9.99824	9.95119	9.70898	9.95839	10.3862	10.2444	10.3198	10.5673	9.90931	10.1583	10.5704
ENSDARG00000010862	amt	7.10627	7.41249	6.55495	6.66056	6.66978	6.86252	7.7126	7.47532	7.86878	7.6656	7.83886	7.75363	6.28216	7.84332	7.75305	6.12555	7.18428	6.68532
ENSDARG00000010873	si:dkey-156n14.5	11.0508	10.539	10.6574	10.9622	11.0586	10.9118	10.5765	10.5347	10.8317	10.8667	10.7265	10.7643	10.6591	10.6047	10.1549	10.8972	10.143	10.5711
ENSDARG00000010878	cdkn1ca	9.57287	7.24095	8.1869	9.34032	8.77106	8.48578	8.68135	7.93165	8.54226	8.89322	7.66171	8.37518	8.91103	7.19266	7.57457	9.35503	7.86006	6.57931
ENSDARG00000010905	mettl13	7.47847	8.17036	7.50785	6.32827	6.22806	6.47654	6.66773	7.19628	7.15736	7.1945	6.52119	7.40846	6.61887	6.58178	6.49377	6.6295	7.05647	6.5907
ENSDARG00000010918	nprl3	7.41962	7.59114	8.6084	8.06513	7.18148	7.15973	7.15965	6.80713	7.29047	6.53375	6.38093	7.3866	7.55672	7.40013	7.35801	7.28581	7.2438	6.74508
ENSDARG00000010925		3.79741	4.59303	3.73061	5.3627	4.31064	3.72991	6.16037	4.77109	4.32398	6.42259	5.2071	5.43463	6.33165	4.69852	4.51225	6.84071	5.33356	4.63574
ENSDARG00000010933	cacna1fa	4.96846	5.25534	3.50462	6.5395	4.55178	5.84011	8.25676	4.6189	6.9075	7.97393	6.93806	6.00341	8.18046	6.45918	5.59396	6.81569	5.64395	5.86299
ENSDARG00000010934	syt14a	4.93095	5.33574	4.92424	4.97798	4.51787	4.86529	4.66638	4.35711	4.92947	4.01472	4.77016	4.35077	5.95905	4.39937	4.6965	5.58957	4.33313	4.62966
ENSDARG00000010936	abcb4	5.11771	3.8361	5.03336	5.94022	5.4187	4.78761	6.08483	5.95908	7.18148	7.05852	6.9635	5.80728	5.81743	7.01636	7.01178	5.90597	7.75959	8.01708
ENSDARG00000010940		4.22305	3.65858	3.64323	4.6107	4.9711	4.93301	4.59422	5.04823	6.08707	5.56681	7.21167	4.86389	4.63987	4.92026	4.15909	3.80812	5.02305	4.83122
ENSDARG00000010941	pomgnt2	7.3601	7.81275	6.51427	7.78253	6.63515	7.07673	6.8909	5.68091	6.88473	7.04624	6.99772	6.04017	8.30156	7.05421	5.61232	7.24548	5.81075	6.46078
ENSDARG00000010945	rapgef6	8.405	7.34009	8.4155	7.98176	9.15823	9.32983	8.25833	8.23606	8.44759	8.6667	8.43528	9.05063	8.45485	8.9881	8.77451	9.21078	8.26821	8.85127
ENSDARG00000010946	cbsb	9.02533	8.00668	8.60568	7.82558	8.09625	8.79294	8.28564	7.14291	8.55594	9.17174	8.40551	8.39944	8.57939	8.20328	7.01558	8.76527	8.25538	8.45305
ENSDARG00000010948	kif11	11.7643	11.7464	11.7199	10.8086	9.29863	9.474	10.3904	9.47879	9.32972	9.88254	9.85792	9.27749	10.0962	9.20404	9.13091	9.63457	9.07766	8.90485
ENSDARG00000010953	ndel1a	5.44292	4.98996	6.20346	7.15467	6.86131	6.14639	6.99777	5.01642	7.89573	7.44232	6.8655	6.97046	7.78538	6.90776	5.89512	7.84502	5.70898	6.6258
ENSDARG00000010956	sh3glb1b	8.91398	9.35673	9.53185	8.56886	9.13829	8.62569	8.78939	9.60234	7.85081	8.65081	9.36499	9.27325	8.54745	9.2274	9.65916	8.98246	8.93538	9.47136
ENSDARG00000010957	mpp2b	5.32195	5.15318	3.73134	7.05428	5.77636	5.11091	6.39016	5.79927	6.26349	6.31555	6.05451	3.8468	7.81977	5.6772	6.07691	7.89734	4.67864	6.05618
ENSDARG00000010958	glmnb	4.31792	3.54712	3.53589	5.1996	4.34597	4.57372	5.7507	3.53061	6.49904	5.3165	3.56095	5.24008	5.21916	3.5216	3.54042	4.65748	4.30108	4.34364
ENSDARG00000010962	fkbp7	6.21577	6.21895	6.4734	6.90804	6.07202	6.30859	7.1402	6.86508	7.04347	7.17744	6.33636	7.26279	6.89353	6.25217	6.61726	7.61473	6.68057	5.66007
ENSDARG00000010965	psma8	10.5565	10.8074	10.7533	10.2475	10.6587	10.5803	10.2723	10.4216	10.4021	10.1556	10.2023	10.7896	9.75713	9.90607	10.7195	10.6409	10.4321	10.281
ENSDARG00000010977	rab34b	5.40973	5.71177	2.19388	5.51705	11.4313	11.1855	5.84902	11.0091	9.75028	4.58248	10.698	11.2902	4.43986	10.4319	11.0179	5.55788	10.7005	10.6587
ENSDARG00000010978	trmt1	7.83506	8.65607	8.15919	6.66207	7.45683	7.03593	7.72976	7.14542	7.44535	8.11094	7.48847	8.36749	7.65495	8.03586	8.21415	7.82154	7.71937	7.78864
ENSDARG00000010981	zdhhc3a	7.52643	7.9105	7.4071	7.5302	8.19549	8.16312	8.20082	8.20843	5.85161	8.3809	8.09671	8.12992	8.45582	8.40876	6.98121	7.74065	8.14323	8.36113
ENSDARG00000011000	gtf2a1	9.89338	9.49662	9.48882	10.1069	9.6562	9.57066	9.44334	9.65067	9.21962	9.43996	9.66472	10.1764	10.0112	9.21561	9.27248	10.027	9.17485	9.79224
ENSDARG00000011020	hnrnpa1a	9.97325	9.68096	9.15044	10.0896	9.55401	9.53518	9.36462	9.55782	8.02461	9.55556	9.66348	8.84604	10.3359	9.47069	9.16225	9.85841	9.61364	9.19979
ENSDARG00000011023	pdlim3a	1.45719	1.45623	1.45593	1.61939	1.785	1.6431	1.45738	1.45579	1.45551	1.45724	1.45662	1.45684	1.6038	1.63665	1.45605	1.45689	1.79721	1.4558
ENSDARG00000011026	zgc:92907	5.06803	4.70181	4.73366	4.22245	4.62861	4.38619	4.56049	3.95813	3.95497	4.63221	4.87224	4.83086	4.88068	4.42151	4.68774	4.90334	4.57098	4.20408
ENSDARG00000011027	fgfr1a	10.6059	10.0974	9.87691	9.43316	8.40127	8.75323	10.6902	7.56741	7.82571	9.90904	7.93763	8.22591	9.8407	7.78948	6.94143	9.85377	9.00633	7.82829
ENSDARG00000011042	pgbd5	3.8375	3.81006	3.80103	5.57034	4.42065	4.71835	5.36366	5.37283	4.99614	4.93193	3.82126	4.30864	6.30402	4.9537	4.82664	5.75789	4.20954	4.4049
ENSDARG00000011049	slc17a9b	8.13443	7.88477	8.35629	7.68569	7.76342	8.04161	8.5329	7.79717	8.85663	8.76757	7.91929	7.02475	7.57204	8.42859	7.65894	7.85456	7.77128	7.1824
ENSDARG00000011055	fbxo9	7.90087	7.84778	7.49444	8.54642	8.35113	8.20095	8.70568	7.68501	8.22784	9.08804	8.09461	8.47524	8.3488	8.51175	8.76092	7.78299	8.1781	8.12738
ENSDARG00000011065	camk2b1	8.94519	9.99746	10.3294	9.59153	11.7879	11.8759	9.15585	10.9865	10.7765	9.62578	11.1682	12.1881	10.7679	11.6241	11.6773	10.1049	11.197	11.2803
ENSDARG00000011066	glra3	4.2316	3.55066	3.53793	5.10751	3.54984	4.2187	5.16288	3.64174	5.73194	5.77111	4.88493	4.65086	6.09153	3.95277	4.0319	6.3587	3.92202	3.82635
ENSDARG00000011072	ddx11	7.43773	7.36243	6.69749	6.08583	5.65065	5.70432	6.93779	7.10214	4.05557	6.55592	6.56762	5.61171	6.36929	6.37479	5.46762	5.90145	5.86116	5.11685
ENSDARG00000011076	zgc:91968	5.78593	3.84476	3.82555	4.24289	6.93908	7.13745	4.55739	5.65172	5.53544	5.03982	3.86822	6.18832	5.01154	5.68092	5.92666	5.41475	5.86762	4.61464
ENSDARG00000011079	wdr3	9.78667	10.1867	9.76579	8.68954	8.95251	8.8462	8.84845	9.17711	9.1805	8.90283	9.06869	9.73173	8.62022	9.19206	9.11573	8.63947	9.39228	9.6435
ENSDARG00000011083	si:dkey-42l23.2	3.3011	3.29779	3.29675	3.29916	3.91246	3.29671	3.48638	4.03537	3.2953	3.98919	3.74181	3.29989	3.44374	3.60228	3.29717	3.30005	4.06828	4.18763
ENSDARG00000011088	si:ch211-288d18.1	6.00047	3.39279	5.14562	8.55866	6.74796	6.73299	8.16012	5.79432	4.57648	8.35505	6.84676	7.15285	8.80874	6.67504	6.0732	8.47901	7.05229	6.72216
ENSDARG00000011091	drd2b	4.30287	3.76815	3.76243	4.56079	4.79025	5.10683	3.78918	3.75977	3.7543	5.14429	4.7284	3.77945	5.14591	4.06345	4.96166	5.56185	4.90702	5.16814
ENSDARG00000011094	ccna2	11.0428	10.7171	10.0015	9.52482	8.57462	8.36461	9.38463	8.03611	8.34885	8.23286	8.34989	8.10519	9.00859	7.67749	8.03375	8.73321	7.29413	8.148
ENSDARG00000011113	chrna10a	2.69421	2.68548	2.68267	2.68913	2.6853	2.68256	3.14598	2.68137	2.67869	4.02975	4.23708	2.69105	4.08908	3.06108	2.6838	3.81169	2.74202	2.68145
ENSDARG00000011122	pptc7a	7.33464	8.07661	7.14528	8.034	8.45344	7.56658	7.83281	8.67234	8.17251	9.17532	8.18518	8.24448	8.8001	8.82151	8.14523	8.29014	8.48589	8.50523
ENSDARG00000011125	snrpb	10.2681	10.4931	9.64345	9.2346	8.96229	8.58666	9.33591	8.7689	7.88315	9.71186	9.46222	8.84966	8.75531	8.62249	9.06678	9.37649	8.96703	8.94511
ENSDARG00000011141	dpysl5a	9.614	6.35278	2.71806	10.5097	8.31573	8.89111	8.82953	8.45452	9.36531	8.98361	7.37054	8.26863	10.5465	8.60823	8.60641	9.49033	8.02769	8.03195
ENSDARG00000011146	uqcrb	4.11243	4.54563	4.79391	4.16015	5.5336	5.00459	4.98038	4.11877	5.25867	4.38105	5.41897	5.39291	4.94014	5.29028	5.18416	5.05904	5.02674	4.8875
ENSDARG00000011152	rpp14	6.92653	7.82571	7.3594	6.71568	6.78517	7.03552	6.4937	7.79838	7.58937	5.87438	6.8667	7.38363	6.04063	6.48952	6.90149	7.51637	6.65912	7.1251
ENSDARG00000011157	arhgef18a	8.52077	7.37631	7.96522	7.25355	7.91463	7.92496	8.31437	8.07227	8.04713	8.68564	8.94998	8.36083	7.73234	8.73122	7.82238	8.1274	8.1855	7.77936
ENSDARG00000011163	sema3fa	9.11208	6.42849	7.10321	8.97623	7.75338	7.25163	8.90548	8.24488	7.36891	9.2657	7.45867	6.81185	9.38325	7.45756	7.79281	9.71472	7.70706	6.88895
ENSDARG00000011166	cahz	10.0585	12.0914	12.8672	12.486	9.83367	8.90657	9.38284	8.68311	8.57278	10.8755	9.15917	8.4987	10.4809	8.15724	7.42938	10.7974	7.12599	7.03201
ENSDARG00000011170	ndrg2	8.98049	9.11495	10.6201	11.3082	10.2424	10.3354	11.1354	11.3838	11.9208	11.3164	11.2424	11.4283	11.7702	11.8086	11.5343	11.1552	11.3484	11.6327
ENSDARG00000011171	si:ch211-12m10.1	6.1351	4.87916	3.14451	9.20612	6.57799	7.82306	8.73204	7.51267	7.84504	9.11291	8.42716	7.52977	10.4583	7.86029	6.67439	10.1025	6.53483	7.61108
ENSDARG00000011175	atp6v1d	8.40528	8.47576	9.51095	8.53356	10.4221	10.7	8.90649	10.1618	9.88223	8.84441	10.2084	10.8345	9.43892	10.6098	10.4619	9.31426	10.4176	11.0541
ENSDARG00000011188	acvr2aa	9.50665	9.41087	8.62836	10.3414	10.884	10.8649	10.5357	10.5797	10.682	10.4944	10.6061	10.7425	11.0673	10.8875	10.9263	10.6802	10.4166	10.2701
ENSDARG00000011190	fgfr1b	9.19552	8.99537	7.81789	8.60481	7.25068	7.75456	8.92428	5.93863	8.26033	8.84797	7.28715	7.50348	8.47003	6.91218	4.90299	8.57179	7.64991	6.86036
ENSDARG00000011196	dnajc11a	9.24894	9.42354	9.12025	8.60172	8.66371	8.8945	8.73628	8.92549	8.56272	8.47116	8.71754	8.81745	8.17733	8.55764	8.73424	7.69859	8.64912	8.9151
ENSDARG00000011201	rplp2l	11.7412	11.7639	11.8413	10.7687	11.7497	11.3105	11.5677	11.1248	10.1829	11.7701	11.8564	12.3194	10.6851	11.6808	11.3458	12.7283	12.199	12.2235
ENSDARG00000011219	akt2	10.9856	10.9865	10.9716	10.7707	10.4942	10.7111	10.6693	10.3515	10.6866	10.8072	10.448	10.8724	10.8428	10.721	10.6105	10.9574	10.7256	10.7173
ENSDARG00000011222	ccdc28b	6.25702	5.40971	6.251	7.05649	5.89985	5.24682	5.41671	5.62799	4.37407	6.09594	4.20895	4.92524	6.55169	5.85184	5.68359	6.64664	5.53971	5.46172
ENSDARG00000011233	pcyt1aa	8.48858	9.52187	10.0907	8.38657	8.68894	9.03334	8.06105	6.82597	9.52287	8.13743	8.28917	8.29624	8.42403	8.53322	8.74857	7.44553	8.796	8.55007
ENSDARG00000011235	otx2b	7.85821	3.00225	2.81054	9.69138	7.62924	7.80183	8.9574	6.76869	6.52975	9.71302	7.78276	7.45795	9.49823	7.35194	7.19675	8.71089	7.50701	6.60958
ENSDARG00000011239	ppp1r14aa	6.40648	7.54552	6.15403	4.75671	6.34758	6.22535	6.43644	6.02777	6.37472	5.79755	4.63576	5.54564	5.84631	5.3539	5.60188	4.16793	5.43341	5.10296
ENSDARG00000011240	ift46	8.23721	7.12442	7.46442	8.46592	8.62204	8.48485	7.95291	8.17872	8.30035	8.07133	8.05912	8.60522	8.83196	7.26357	7.97397	8.70709	7.98693	7.69971
ENSDARG00000011245	esrp1	7.49392	6.25751	5.35606	7.38801	5.29022	5.96317	7.90845	6.04882	7.11445	7.5077	8.44146	6.81246	5.92481	5.68402	5.69468	6.17231	6.28505	6.05732
ENSDARG00000011246	krr1	8.73612	7.80203	8.37765	8.09478	7.75841	7.87814	8.01379	7.27636	7.68867	8.01798	7.85645	8.53639	7.62844	7.82095	7.39976	7.33797	8.03303	7.95454
ENSDARG00000011247	rnpc3	7.44196	7.75958	5.83958	7.3796	7.75975	7.13191	7.42511	5.62409	7.43955	6.95019	7.66295	6.49418	7.66085	6.79987	7.07327	7.13811	7.06464	6.69399
ENSDARG00000011257	enpp2	5.30657	5.73576	5.57245	5.52509	4.86652	5.30956	7.07102	5.76193	5.55673	7.14947	5.04789	5.29321	6.30214	4.81918	4.23956	6.47098	5.78236	4.76808
ENSDARG00000011259	trpm1a	5.0098	3.94026	3.91671	5.48263	5.41685	4.54742	5.7766	6.40278	6.8328	6.1735	3.96867	6.08185	7.24832	6.27565	6.20615	6.30594	5.08193	5.28384
ENSDARG00000011262	traip	7.31547	7.99148	7.94895	7.39265	4.95505	6.60934	6.56705	6.17124	7.62906	5.49277	6.17229	5.53999	6.27061	4.43978	5.56081	5.84602	5.69066	5.53815
ENSDARG00000011272	uqcc2	6.79775	8.36867	7.66432	7.40967	8.32937	7.69735	7.63542	8.6792	7.79679	7.36972	8.94369	8.97234	7.97232	8.66637	8.63716	7.87682	8.71257	8.71529
ENSDARG00000011273	tlx2	6.32589	7.6441	8.60153	6.50788	5.73683	5.90508	6.73189	5.57965	5.92533	6.72007	6.30926	6.12686	6.70049	5.72991	6.29783	7.18532	5.56797	6.12967
ENSDARG00000011283	si:dkey-110k5.10	0.747396	0.878416	0.441802	0.442229	0.441975	0.441795	0.442685	0.441718	0.441545	0.4426	0.442221	0.442357	0.441706	0.441576	0.441876	0.442385	0.441644	0.441723
ENSDARG00000011298	atf7a	8.2943	8.20074	7.99066	7.3408	7.66655	7.50823	8.2815	8.5002	8.67283	8.15495	8.39588	8.19216	7.61537	8.11307	8.56127	7.46755	8.26226	8.16568
ENSDARG00000011299	blzf1	8.36461	8.94338	9.564	8.83875	9.01911	8.85477	8.0821	8.64138	8.58781	7.76563	8.87347	8.68041	8.60009	8.47474	8.85141	8.86496	8.49033	8.3151
ENSDARG00000011301	nae1	8.60619	8.06505	7.94347	8.55271	9.36934	9.18641	8.61608	9.57149	8.87056	7.27278	9.03641	9.09545	8.5939	8.89301	9.63633	8.78624	9.20077	8.79266
ENSDARG00000011312	stk3	10.0767	10.4096	10.7118	10.2809	10.6028	10.7083	9.97997	10.5893	10.6895	9.98131	10.2672	10.8371	10.0911	10.5543	10.909	10.3735	10.6858	10.8463
ENSDARG00000011317	adra1ba	3.44251	2.8895	2.3611	2.36487	2.58946	2.36103	2.93937	2.36034	2.35879	2.72578	2.3648	2.36598	2.49619	2.51969	2.36176	3.04063	2.35968	2.36039
ENSDARG00000011326	ankrd45	0.874288	0.873478	0.873223	0.873814	1.06368	0.873213	1.43431	0.873106	0.872866	0.874327	0.873803	0.873992	0.932131	0.872909	0.873325	0.87403	1.07706	0.873113
ENSDARG00000011333	arhgap33	10.4067	9.13513	9.04549	10.6927	8.85557	9.01596	10.2076	8.54765	8.74752	9.93436	8.85032	8.61018	10.4553	9.03681	8.4381	9.72235	9.46481	9.11815
ENSDARG00000011334	ncaldb	4.26127	3.79423	7.27235	5.58785	3.79263	3.76808	7.20831	5.03234	6.47404	5.42858	5.62127	5.59846	6.42828	4.90455	4.81728	5.64078	6.0219	5.48542
ENSDARG00000011360	nfatc2ip	6.79574	6.73319	6.76029	7.05083	6.29304	6.70639	6.50528	6.49661	7.43442	6.82721	5.97285	6.53394	6.7257	6.35867	6.33592	6.56893	6.25955	6.17019
ENSDARG00000011370	fyna	8.19191	5.50408	5.63731	9.42364	7.24462	7.69168	8.47436	7.59133	7.31266	8.54339	8.22585	7.78583	9.65096	5.83433	7.18298	9.51387	6.88407	6.7343
ENSDARG00000011371	zgc:64106	4.45013	4.62971	5.51242	5.22802	4.72867	5.45866	5.22077	5.546	5.87543	6.68325	6.43385	4.47193	5.29296	6.13412	5.04306	4.54332	5.87464	5.39291
ENSDARG00000011373	mknk2a	6.03146	5.98807	6.35015	5.55815	4.86845	4.85096	5.95609	5.37001	5.22783	6.1095	4.94711	5.65761	5.98804	5.47617	6.02745	5.78617	5.27046	5.35115
ENSDARG00000011376	dnase1l4.2	7.70937	9.4674	9.21235	6.35807	4.94951	3.80347	5.50368	6.74946	5.64673	7.52506	6.34931	3.14448	5.75858	5.48602	3.43271	4.8761	6.34102	6.529
ENSDARG00000011400	tnnc1a	3.60781	8.68049	9.04805	2.48733	10.9231	10.4738	2.83489	9.89603	8.49442	2.77886	7.65449	2.59857	2.10459	8.00349	8.35371	2.62114	11.2065	9.93948
ENSDARG00000011404	fen1	9.65337	9.10318	8.94426	8.11836	7.96852	8.01345	9.15124	8.72487	8.57875	8.5453	7.90766	8.87942	8.03978	7.88414	8.52478	7.9031	8.081	8.04811
ENSDARG00000011405	rps9	11.9373	12.496	11.2553	11.0788	12.357	11.7778	11.4078	11.9078	11.1363	11.5963	11.9931	12.5307	10.7799	11.3164	11.9773	11.5065	11.5858	11.3639
ENSDARG00000011407	col2a1b	12.2575	11.069	10.3336	12.8352	11.4483	11.2217	13.8242	11.6837	13.2658	14.4358	12.2972	10.9896	13.7891	11.8673	10.5633	14.2899	11.2365	10.3675
ENSDARG00000011410	aadat	4.71651	4.23285	5.77142	5.4283	5.03471	5.95649	5.64705	4.22164	4.68403	5.22171	5.40548	5.28595	5.16283	5.87841	5.55926	5.2043	5.47918	5.46013
ENSDARG00000011418	sigmar1	6.81914	7.28586	6.76149	6.8541	9.95203	10.2511	7.42229	8.82305	8.11285	7.86684	8.36616	9.6309	6.78414	7.99122	9.18029	6.13142	9.32865	9.20784
ENSDARG00000011422	ryr1a	7.64873	5.91292	2.88891	7.39663	7.36076	7.38968	7.32863	8.00888	10.0553	8.12314	8.45924	8.31455	8.59616	9.98433	8.39523	8.82748	9.03663	8.56545
ENSDARG00000011434	ptger2a	6.17884	7.65612	8.11562	6.5532	6.44385	4.98182	7.17245	6.26345	7.85418	7.24935	6.39886	5.33805	7.07295	5.65481	5.1062	7.60962	6.51163	5.90589
ENSDARG00000011445	elmsan1a	7.10877	7.08977	7.35008	6.69045	7.80323	8.13897	7.91323	7.49811	7.87237	7.67866	8.77544	8.94648	7.36973	8.80203	8.77695	7.08496	8.49234	8.30905
ENSDARG00000011449	fes	5.93199	6.23844	6.81295	5.50169	5.4269	5.30317	5.97305	5.59951	4.31149	5.54298	6.08948	6.70171	5.60622	5.86321	6.15716	5.57168	6.25088	5.58349
ENSDARG00000011459	gsna	9.18678	9.11666	8.54886	9.13266	11.4049	11.6822	9.58314	11.0952	11.0334	9.18777	11.0952	11.8113	9.39956	11.2549	11.5517	10.024	11.6625	11.8751
ENSDARG00000011462	otub1b	8.62165	8.48331	8.98189	8.75689	8.6632	8.36657	8.13865	9.5194	9.35967	8.5609	9.0635	9.02257	8.53375	7.44445	8.08265	8.82673	8.0419	8.61289
ENSDARG00000011463		2.49818	2.49556	2.49473	2.49665	2.66521	2.79501	2.8718	2.49435	2.49357	2.4983	2.49661	2.7369	2.8941	3.07575	3.15054	2.49735	2.53023	2.94136
ENSDARG00000011466	afg1la	6.29105	6.54603	7.86087	6.75801	7.09608	6.6475	6.7038	6.74929	7.0693	7.21657	7.13272	5.99158	6.8399	7.04068	6.73227	7.20049	7.11832	7.00551
ENSDARG00000011473	calcrla	6.06811	8.87359	8.49663	6.98398	6.06068	5.81429	7.30318	6.55105	7.44227	7.67339	5.59747	5.47503	7.13294	5.74409	5.93238	7.13386	6.48635	4.75856
ENSDARG00000011487	gnaq	5.55044	4.61784	3.96571	6.44272	6.61428	6.72972	5.13086	5.68011	6.25054	6.88189	6.22797	7.11824	7.48013	6.70753	6.41634	7.9182	6.48112	7.01767
ENSDARG00000011488	sirt2	8.03942	8.21433	8.10264	7.60397	9.09344	9.05116	8.05521	8.6081	8.7703	7.55531	8.88063	9.12789	8.10124	8.92137	9.32331	8.1676	8.88636	9.17247
ENSDARG00000011490	scube3	8.50757	8.52547	8.05434	8.04336	6.82921	6.47193	8.7842	6.56772	7.62851	8.78728	7.13166	5.45684	8.43075	6.6556	4.31098	8.1281	7.65351	6.22036
ENSDARG00000011493	dcun1d3	7.88289	7.73942	7.80481	7.76125	6.34919	7.83889	7.29928	6.78792	6.56185	7.39564	7.21846	6.47944	7.93855	7.51279	7.47431	8.34516	7.08733	7.68807
ENSDARG00000011496	ppm1bb	10.2973	10.2274	10.2769	10.3725	10.5955	10.836	10.4627	9.77297	10.5149	10.0814	10.3125	10.1997	10.4367	10.3769	10.5066	10.5477	10.5605	10.396
ENSDARG00000011498	si:ch211-212o1.2	7.48019	8.20333	8.35248	6.42081	8.68902	8.18098	7.08996	9.04029	8.09554	7.09507	8.43164	8.28303	7.17455	8.1638	8.69443	7.31323	8.61523	8.1003
ENSDARG00000011506	lpcat1	7.69387	8.21258	8.32234	7.49205	8.13472	7.92391	7.60935	8.28723	7.14156	7.31464	7.31194	8.31586	7.21105	6.71598	7.46222	7.23545	7.63186	8.16044
ENSDARG00000011510	rcc2	10.9773	9.73905	10.2723	11.1072	9.79067	10.2668	10.7445	10.2755	9.65075	9.76353	9.5188	9.56437	10.481	9.76019	9.47397	10.0278	9.70289	9.36855
ENSDARG00000011515	orai1a	5.42492	7.01203	6.75156	5.61562	5.35712	5.62429	6.12789	6.25938	5.56861	4.32378	6.25347	5.52708	5.61737	5.59374	5.49519	5.22083	6.74906	6.18736
ENSDARG00000011519	myl4	4.2732	3.53876	3.5266	4.6795	4.18811	3.5261	3.71501	6.10039	4.8771	3.57673	3.74083	4.59163	5.20335	6.313	3.53151	5.67397	5.5033	4.95273
ENSDARG00000011521	upb1	6.44925	6.14655	3.70819	4.57373	5.60581	5.5329	6.46886	7.53924	8.02136	5.91113	7.23694	6.80685	5.16743	8.20769	7.23649	5.66416	6.85723	6.64453
ENSDARG00000011533	sema6dl	11.3141	9.90592	9.91917	10.5343	8.97425	9.35953	10.1856	8.5178	9.03355	10.7766	8.42699	7.72286	10.5892	8.64163	6.93961	10.4693	8.79632	7.48286
ENSDARG00000011537	ugt2a5	4.65695	4.33118	4.96279	5.50984	5.36196	5.28541	5.36114	6.24002	6.93533	6.27291	6.12101	6.4722	5.40835	5.69746	5.85825	5.71778	5.54489	5.73289
ENSDARG00000011545	arrb2b	10.1948	10.9607	10.4636	9.45102	10.4768	9.8648	9.45883	10.8321	10.6919	9.72734	10.6771	10.9729	9.69137	10.629	10.299	8.65086	10.7827	10.6584
ENSDARG00000011549	c1ql4a	4.28671	3.17006	3.16625	4.56089	3.72455	3.44368	3.18415	3.16448	4.54376	4.27371	3.17486	3.17762	4.70883	3.16148	3.16778	4.48515	3.22391	3.16458
ENSDARG00000011553	atp5pb	10.251	10.5398	10.2238	9.9586	11.0632	10.78	10.4627	11.1599	11.0669	10.4131	11.0956	10.9454	10.4862	11.1354	11.209	10.7811	10.7816	10.9153
ENSDARG00000011555	spag7	9.28951	9.83873	9.14349	9.39519	9.89081	9.56706	9.11164	9.71656	10.0807	9.62828	9.41062	10.2587	9.31637	9.72102	9.86321	9.05996	9.88388	9.95868
ENSDARG00000011564	sfpq	12.7137	11.423	11.4214	12.8712	11.9491	12.1062	12.137	11.6056	11.4682	12.2783	11.3551	11.2594	12.2992	11.8731	11.8051	12.5059	11.8458	11.8104
ENSDARG00000011570	pou6f1	8.65472	7.91761	8.04965	9.01189	7.63602	8.14815	8.64445	7.84652	8.3359	8.3804	8.39086	8.39798	8.58583	7.64229	7.79412	8.02008	7.79282	7.05622
ENSDARG00000011571	calcrlb	6.00823	7.84755	7.04529	5.92195	5.9929	5.35292	5.85129	5.64915	3.86453	5.91965	5.65537	5.26699	5.47955	6.02037	3.91501	5.82071	5.08348	5.06212
ENSDARG00000011573	abcb11a	4.14468	4.51343	4.13621	5.11806	4.50837	4.46355	4.41854	4.84045	5.89647	5.12651	4.14081	4.76153	4.43389	5.03802	4.48453	4.14262	5.39242	4.41307
ENSDARG00000011579	hoxb10a	5.4513	5.69521	4.03132	5.46488	4.72448	4.38318	5.85148	4.06564	4.42866	5.21493	5.14823	5.16384	5.767	4.68982	4.90494	5.81248	4.99639	4.06618
ENSDARG00000011581	si:dkey-23k10.5	3.61248	3.36751	4.73445	3.91833	4.22204	3.36497	3.44806	3.36394	3.38002	3.80215	3.4212	4.07325	3.7373	4.04447	4.17809	3.37275	4.19302	3.84207
ENSDARG00000011582	sox5	11.1178	10.0674	10.1287	11.7962	12.3906	12.3078	11.8026	12.3915	11.7624	12.173	12.019	12.2229	11.86	12.1454	12.3224	11.6005	11.5339	11.9091
ENSDARG00000011583	cry1ab	7.08257	6.65843	7.72256	6.82048	9.0798	8.40275	7.95122	8.72622	8.80896	7.67954	8.72093	9.11299	8.28633	8.78729	9.03022	8.59909	8.8187	9.03031
ENSDARG00000011594	smarcb1b	9.63499	8.83222	8.87377	10.019	9.07576	8.82291	8.84125	8.69113	8.65693	9.48604	8.68212	8.26815	9.12006	7.91997	8.35757	9.49166	7.68689	8.04283
ENSDARG00000011597	atxn2l	11.4254	10.7801	11.4939	11.4412	10.3481	10.7679	10.4137	10.2306	10.5092	10.4391	10.061	10.1544	11.0422	10.7702	10.4596	11.5232	10.6392	11.0146
ENSDARG00000011600	epha4b	9.96588	7.76889	2.63695	10.298	8.62535	8.53182	9.28877	8.29524	7.4027	10.3027	8.29845	7.84654	10.398	7.99526	7.09717	10.3475	8.23404	6.86298
ENSDARG00000011602	si:dkeyp-117h8.2	6.16618	4.55008	4.22078	9.22938	7.65137	7.80563	7.79346	7.53254	8.3139	8.7384	8.3707	8.35618	9.71433	7.79539	7.01194	9.38869	7.31843	7.55649
ENSDARG00000011605	dennd6b	6.21627	6.34252	7.07053	6.96378	5.38092	5.70365	6.28629	5.68087	5.48322	6.90889	5.21078	6.16262	7.14821	6.10879	5.12844	7.56686	5.47746	5.71352
ENSDARG00000011609	si:ch211-262e15.1	10.7293	10.0489	9.82912	10.8362	9.4696	9.96501	10.2343	9.9462	9.56515	10.5169	10.238	9.78471	10.7992	9.90778	9.61636	10.5484	9.73638	10.1563
ENSDARG00000011611	actr1	10.6994	10.3787	10.1618	10.439	11.2468	11.4607	10.2425	10.7033	10.6769	10.0519	10.7798	10.9236	10.6662	10.82	11.084	10.6136	10.8441	11.1598
ENSDARG00000011613	rbm39a	10.9385	10.7954	10.9867	10.7681	10.5485	10.1641	11.1162	10.4632	11.1525	11.1341	10.4522	10.465	11.047	10.5457	10.7462	11.2184	10.4411	10.4672
ENSDARG00000011615	mybpc3	5.35712	8.82683	10.2107	6.36105	11.3954	11.145	5.58794	9.89716	9.88092	6.94425	9.48762	5.73864	6.80565	9.73373	9.09426	5.42175	12.0214	10.7611
ENSDARG00000011618	slc26a2	6.99489	7.16902	8.03188	8.19452	11.0321	10.6513	8.76246	9.21691	9.55291	8.95485	9.76623	10.2979	7.926	9.90467	10.0643	6.96734	9.66669	9.85205
ENSDARG00000011635	scxb	2.59749	2.59344	2.59215	3.65496	3.30264	2.84226	3.24945	2.59156	2.59034	2.59769	2.59507	2.59601	3.16015	2.59056	2.79702	3.2611	2.59104	2.61733
ENSDARG00000011640	syt5b	3.36584	4.87368	5.43429	8.22795	6.90664	6.31729	9.26611	8.53843	7.65939	10.1673	8.21816	8.0631	9.37557	6.9331	5.38193	8.91306	6.27484	6.3509
ENSDARG00000011648	snrpd1	10.0089	10.2704	9.01377	9.46005	9.58392	8.79076	9.55848	9.66572	8.40904	9.15131	9.34156	9.34754	8.84183	8.35728	8.50691	9.41537	8.77165	8.75262
ENSDARG00000011652	si:zfos-979f1.2	4.14189	4.31289	3.70222	4.56632	5.44605	5.34273	4.74648	5.23932	3.69101	4.27062	5.62114	5.74593	3.77905	5.46728	4.42939	3.72651	4.00364	3.69879
ENSDARG00000011652	ftr52p	4.14189	4.31289	3.70222	4.56632	5.44605	5.34273	4.74648	5.23932	3.69101	4.27062	5.62114	5.74593	3.77905	5.46728	4.42939	3.72651	4.00364	3.69879
ENSDARG00000011661	twf1b	7.31391	7.22863	7.47021	7.69561	7.4052	7.24339	7.87424	7.20445	7.69882	7.37944	7.12745	7.0819	7.64151	6.98181	6.0804	6.95513	7.28909	7.1455
ENSDARG00000011662	chuk	9.61744	9.44187	9.36422	9.04708	10.557	10.5198	9.41243	10.4865	9.94368	9.62914	10.1125	10.8018	9.39709	10.2431	10.6295	8.94033	10.0196	9.94952
ENSDARG00000011665	aldoaa	11.5101	11.6355	11.1068	10.4351	12.1366	11.9651	10.659	11.5349	11.3779	10.6347	11.8821	11.8317	10.9744	11.3317	11.1772	11.1228	11.9352	12.0174
ENSDARG00000011671	pde6b	4.58642	5.07585	5.00225	4.75655	4.88447	4.28013	6.43389	4.0312	5.64463	5.09364	5.06591	5.58043	5.82523	4.64542	5.87548	5.32172	4.19193	5.05824
ENSDARG00000011672	sema3b	9.37841	7.4477	6.20415	9.49103	7.6576	8.41941	9.76396	7.01	8.79908	9.80352	8.68501	8.27625	9.39348	7.13236	7.62495	8.98323	7.82944	7.52466
ENSDARG00000011673	si:ch211-246m6.5	5.74958	5.13902	3.94763	5.65086	5.10059	4.60665	5.39626	3.94453	4.95911	5.8507	4.50454	3.96746	4.7687	4.17405	4.5357	5.19645	4.80058	4.39162
ENSDARG00000011683	prtfdc1	7.44017	8.07666	6.32134	6.52148	11.4188	11.0578	6.7059	10.8562	10.0472	6.41827	10.7553	11.8252	6.24319	9.9899	10.9323	5.4973	10.8807	10.9167
ENSDARG00000011693	ttc36	4.29728	3.86059	3.83845	4.70822	3.85917	4.72833	6.16947	7.07601	5.93306	5.21439	5.7407	5.67735	5.65107	7.17704	6.17785	5.65508	5.98418	5.30811
ENSDARG00000011696	esrrgb	2.80028	2.14477	2.14392	2.35382	2.14472	2.14389	2.3819	2.14353	3.16488	2.14759	2.14585	2.14648	2.38806	2.45095	2.14426	2.1466	2.34662	2.14356
ENSDARG00000011701	ctsll	1.12758	0.972733	0.972564	0.972955	1.24934	1.0941	0.973376	0.972486	0.972328	0.973297	0.972948	0.973074	1.07762	0.972356	0.972631	1.16716	0.972419	0.972491
ENSDARG00000011703	clocka	7.52497	7.12681	7.36745	8.8888	8.04664	8.36269	9.16969	8.51867	8.53961	8.96735	7.50934	8.03274	9.18389	8.87464	8.95351	8.99978	8.39861	8.49
ENSDARG00000011723	zgc:56556	6.62952	5.98325	6.42783	6.43511	6.58049	6.16789	5.85969	5.93886	5.65591	5.81476	4.38442	5.2631	6.489	6.36983	6.88831	6.78539	6.90295	6.33528
ENSDARG00000011724	marveld1	7.00346	7.99476	7.93238	7.04555	7.41312	7.21298	6.89307	8.18161	7.50582	7.74742	6.99025	7.89962	7.1056	7.38085	7.68518	7.46125	7.44695	7.4704
ENSDARG00000011727	b9d1	7.18512	7.24782	7.69787	7.53423	5.47714	6.20711	7.25465	6.79864	6.71436	6.96556	7.63816	7.23582	7.17271	6.60617	6.39135	7.58364	6.82319	6.32073
ENSDARG00000011740	u2af2b	11.3098	10.9468	11.1842	10.8554	10.1634	10.2274	10.1473	10.2651	10.6186	9.94859	10.1764	9.63319	10.4089	9.96197	10.2886	10.7084	10.025	10.4487
ENSDARG00000011743	pigo	8.28802	8.56415	7.81545	8.31774	7.74866	7.831	7.98727	7.45567	7.31805	7.08614	7.21787	5.01366	7.55478	8.23301	8.04227	7.44206	7.21341	7.4528
ENSDARG00000011764	ints13	8.27963	8.69142	9.28305	8.44778	8.20541	8.93797	7.91757	8.06914	7.52811	8.29021	7.90872	7.94141	8.4102	7.95209	8.19188	8.51506	8.36344	8.38449
ENSDARG00000011769	cpm	6.86036	6.29717	5.44593	7.42492	6.19752	5.70659	7.93655	4.87097	8.10433	7.36184	6.56991	7.54864	6.51689	6.89917	7.08653	6.85986	6.6728	5.76639
ENSDARG00000011770	dhrs12	7.57197	8.25604	8.09379	6.52722	9.8492	9.62013	7.72057	9.64965	8.25172	7.80884	9.72338	9.73874	7.34612	8.67468	9.32695	7.34012	8.96264	9.3966
ENSDARG00000011777	cttn	7.79837	7.74877	8.5309	8.49844	8.57405	9.05798	8.16075	7.94913	7.50082	8.74766	8.33605	8.85635	8.34465	8.66056	8.58725	8.74141	8.69904	8.4322
ENSDARG00000011783	stag2a	9.43222	9.92422	9.88583	9.84967	10.4179	10.1639	10.2716	10.0565	10.3065	10.3309	10.6961	10.6334	10.0173	10.6377	10.301	9.86062	10.2569	10.1261
ENSDARG00000011785	tbx6	6.03388	4.20026	5.26318	4.23414	4.19115	3.93237	3.22255	3.15731	3.14422	3.21728	4.52751	3.20181	4.42142	4.57579	3.32314	3.77499	3.62236	4.77496
ENSDARG00000011797	tent5bb	4.00895	3.871	5.6908	7.24267	5.53925	6.03916	7.71206	6.17076	7.54144	7.79815	6.61352	7.26639	7.07102	5.89877	6.38817	6.69987	6.12764	5.3989
ENSDARG00000011801	wars2	5.8339	4.3641	4.29395	5.23435	5.06938	4.94398	5.66414	5.68683	4.34327	5.37222	4.03587	5.31406	4.77617	4.49217	4.1093	4.62193	5.06905	4.83357
ENSDARG00000011809	mical1	7.20632	7.1063	7.25264	7.32923	6.05852	6.26093	7.7828	6.49765	7.30189	6.34395	7.36902	4.23646	7.07749	6.64046	6.51923	7.33931	6.42549	6.6215
ENSDARG00000011818	batf	1.22728	1.16445	1.16402	1.16503	1.16443	1.164	1.16611	1.16381	1.1634	1.16591	1.16501	1.16533	1.21088	1.16347	1.16419	1.1654	1.70905	1.97902
ENSDARG00000011819	pcnx1	10.1792	9.39758	9.65075	10.2129	9.07818	9.36925	10.0391	9.78589	9.00598	10.4164	9.21708	9.44225	10.4048	9.40839	9.23446	10.1773	9.28193	8.90342
ENSDARG00000011821	plod2	7.82909	6.85179	7.88621	8.70408	9.04038	9.77373	9.81691	8.99294	8.99334	9.91699	8.64459	8.78121	9.2308	8.74569	8.62273	9.64175	8.81444	8.25371
ENSDARG00000011824	pbxip1b	6.90608	5.3715	6.60184	6.48795	6.8075	7.19103	7.54815	7.37044	6.70022	7.52335	7.82555	8.14003	7.52914	8.00324	6.77695	7.59749	7.36461	7.15352
ENSDARG00000011825	cetn3	5.8596	5.58012	6.07544	5.27299	5.17757	5.68409	5.21905	5.43574	4.2904	6.3117	6.18084	4.71278	5.5378	5.13597	5.73686	5.22161	5.50479	5.5681
ENSDARG00000011837	zgc:100846	5.88668	6.91011	6.84971	7.12793	7.5147	8.15364	5.78061	8.15089	7.94036	5.62867	7.73257	6.92916	7.54185	7.68028	7.05212	6.73364	7.32989	7.65771
ENSDARG00000011841	atp5l	7.0088	8.46163	7.98303	7.70019	8.71048	8.4895	8.40359	9.03156	7.76106	7.97075	9.02228	8.82738	7.66862	8.93027	8.66873	8.8936	8.38422	8.84074
ENSDARG00000011845	chn2	5.05813	5.03657	3.12843	5.74934	8.02585	7.81713	6.85115	7.57543	6.81482	5.96005	8.54726	8.69381	7.03671	8.35969	8.89865	6.22475	8.33279	8.70325
ENSDARG00000011851	map2k5	7.44409	7.44392	7.46218	7.77342	7.7358	7.97669	7.43471	7.4113	8.45789	6.67527	7.31362	7.97855	7.55368	7.71657	8.02068	7.59277	7.78442	7.51147
[truncated: 23,939 more rows]
