# Supplementary material for: Dynamics of cardiomyocyte transcriptome and chromatin landscape demarcates key events of heart development
Source: HighWire-hosted journal article supplement (doi:10.1101/gr.244491.118), 2019-02-13
Supplement: Supplement_Table_14.xlsx [file Supplement_Table_14.xlsx]

## Sheet: Supplement_Table_11_atac_rld
Supplement Table 14. DESeq2 regularized logarithm (rld) values for ATAC-seq samples.
ENSEMBL_ID	ZFIN_ID	wt_GFPpos_24hpf_1	wt_GFPpos_24hpf_2	wt_GFPpos_48hpf_1	wt_GFPpos_48hpf_2	wt_GFPpos_72hpf_1	wt_GFPpos_72hpf_2	gata5_GFPpos_72hpf_1	gata5_GFPpos_72hpf_2	tbx5_GFPpos_72hpf_1	tbx5_GFPpos_72hpf_2	hand2_GFPpos_72hpf_1	hand2_GFPpos_72hpf_2
ENSDARG00000000001	slc35a5	37	28	24	10	33	37	18	22	20	14	57	50
ENSDARG00000000002	ccdc80	74	51	31	25	28	55	6	16	52	63	39	33
ENSDARG00000000018	nrf1	662	338	245	136	397	563	248	461	522	192	687	581
ENSDARG00000000019	ube2h	297	153	118	72	164	301	182	205	168	49	247	292
ENSDARG00000000068	slc9a3r1a	152	94	120	57	115	168	98	129	110	25	181	333
ENSDARG00000000069	dap	155	107	88	53	121	167	64	71	54	39	197	150
ENSDARG00000000086	itsn1	134	60	44	32	105	150	68	84	96	54	131	176
ENSDARG00000000103	myh10	224	116	171	90	168	209	155	214	185	81	234	197
ENSDARG00000000142	tmem267	69	35	51	17	40	74	45	113	56	42	100	90
ENSDARG00000000151	thraa	445	226	217	149	267	300	200	276	320	175	425	395
ENSDARG00000000161	itsn2a	375	181	178	103	181	246	137	187	268	143	165	252
ENSDARG00000000175	hoxb2a	134	87	70	34	88	111	26	30	77	117	84	77
ENSDARG00000000183	ptpn4b	35	20	4	3	13	9	1	1	36	23	3	6
ENSDARG00000000189	sema6e	43	26	91	40	57	84	24	23	48	84	29	22
ENSDARG00000000229	usp49	463	272	149	131	227	282	245	218	252	163	329	357
ENSDARG00000000241	slc40a1	131	69	62	47	78	119	62	47	124	82	81	101
ENSDARG00000000324	dcaf8	22	7	20	5	8	22	7	4	15	8	11	9
ENSDARG00000000369	prkag3b	44	25	57	24	46	63	8	17	50	14	53	69
ENSDARG00000000370	triob	66	41	66	31	56	71	28	38	80	29	66	54
ENSDARG00000000380	pde6a	52	21	45	27	47	82	18	15	26	28	37	33
ENSDARG00000000394	matr3l1.1	86	46	41	36	67	107	62	55	82	41	139	88
ENSDARG00000000423	si:ch73-314g15.3	21	22	42	11	20	37	12	14	37	43	29	22
ENSDARG00000000442	slc39a13	118	87	62	46	72	142	61	36	104	49	68	124
ENSDARG00000000460	nitr2b	11	7	23	5	17	14	8	21	0	31	13	9
ENSDARG00000000472	cntn2	23	12	28	16	22	18	3	8	9	3	10	16
ENSDARG00000000474	tnni1a	12	3	5	6	4	14	0	6	4	0	14	10
ENSDARG00000000476	pms1	81	28	74	36	38	76	22	27	45	55	71	85
ENSDARG00000000489	upf3b	216	114	42	36	68	92	49	45	32	32	78	90
ENSDARG00000000503	stx1b	55	32	37	17	34	52	20	41	45	11	35	52
ENSDARG00000000516	ankar	78	57	62	34	62	70	54	49	62	15	72	94
ENSDARG00000000529	ofd1	59	25	52	23	61	48	14	5	50	32	61	47
ENSDARG00000000540	asnsd1	55	21	39	17	31	57	38	28	36	36	50	39
ENSDARG00000000540	asdurf	55	21	39	17	31	57	38	28	36	36	50	39
ENSDARG00000000542	gtf2e1	71	43	25	29	62	70	32	50	47	24	111	80
ENSDARG00000000551	slc1a4	139	54	46	24	77	116	70	82	99	32	99	117
ENSDARG00000000563	ttn.1	8	18	21	9	19	8	0	0	0	0	18	13
ENSDARG00000000567	znf281a	456	224	278	140	285	272	142	189	315	149	445	324
ENSDARG00000000568	ell	473	245	222	142	278	408	246	254	304	143	424	522
ENSDARG00000000588	grasp	223	103	60	44	99	125	87	153	119	93	161	165
ENSDARG00000000606	dnah6	56	25	55	28	48	60	17	17	45	33	59	57
ENSDARG00000000631	ptpn4a	294	153	180	97	123	158	129	124	183	90	214	274
ENSDARG00000000638	opn1mw4	13	10	18	7	24	9	0	10	2	11	7	0
ENSDARG00000000666	creg2	130	76	94	61	89	143	34	36	83	81	115	97
ENSDARG00000000690	sypl2b	71	30	69	56	88	131	108	79	206	55	112	99
ENSDARG00000000729	daxx	228	136	129	119	162	308	132	200	178	86	231	261
ENSDARG00000000730	slc6a22.1	315	201	165	119	201	225	80	128	123	136	412	305
ENSDARG00000000747	lcmt2	24	11	21	13	17	45	26	25	8	14	48	30
ENSDARG00000000760	znf511	100	52	36	40	61	69	34	25	121	30	79	55
ENSDARG00000000767	spi1b	227	110	69	39	80	82	84	63	92	70	146	101
ENSDARG00000000779	scfd1	102	64	51	37	45	81	53	23	31	16	72	72
ENSDARG00000000796	nr4a1	641	347	205	124	325	311	330	488	247	133	600	665
ENSDARG00000000804	rassf6	39	35	33	19	25	29	7	18	23	9	18	69
ENSDARG00000000830	telo2	79	46	66	33	64	104	53	80	87	23	112	122
ENSDARG00000000837	snx9a	45	27	24	5	25	36	18	7	40	12	40	33
ENSDARG00000000853	dstyk	104	91	39	29	49	82	62	51	55	36	98	88
ENSDARG00000000857	mapk14a	312	179	273	168	298	277	200	308	267	214	399	516
ENSDARG00000000861	scrib	930	440	309	262	514	743	287	407	514	238	685	618
ENSDARG00000000887	zgc:56699	36	19	20	21	26	59	8	21	8	2	13	21
ENSDARG00000000935	unk	306	229	255	169	346	451	280	421	519	241	692	644
ENSDARG00000000943	dzip1	270	128	135	61	122	120	72	105	74	87	126	135
ENSDARG00000000966	ncor2	35	16	55	40	49	97	42	21	116	51	40	44
ENSDARG00000001014	myh9b	54	35	26	16	22	22	21	23	45	8	52	43
ENSDARG00000001015	znf384l	36	24	47	16	55	67	23	50	13	26	78	89
ENSDARG00000001127	slc17a6a	61	44	45	19	52	60	18	24	73	13	34	40
ENSDARG00000001129	dicer1	243	131	71	25	59	49	45	20	70	54	88	85
ENSDARG00000001154	rimbp2	7	8	13	3	22	17	4	0	14	11	4	1
ENSDARG00000001162	matr3l1.1	9	4	7	6	14	33	1	2	6	2	10	0
ENSDARG00000001169	hsd17b8	332	151	117	71	123	153	48	137	114	70	198	182
ENSDARG00000001210	arl14ep	7	11	5	5	17	12	0	2	20	5	13	7
ENSDARG00000001220	mycbp2	588	408	369	250	512	637	494	673	592	280	998	1022
ENSDARG00000001234	map4k2	118	74	55	32	41	69	21	26	27	141	62	28
ENSDARG00000001241	puf60b	186	120	133	73	157	227	99	119	181	62	192	128
ENSDARG00000001244	srrm1	116	76	86	45	58	142	38	25	50	45	95	88
ENSDARG00000001249	pcgf1	248	126	124	99	160	189	75	122	206	163	231	234
ENSDARG00000001259	gas2a	5	8	5	6	13	18	0	6	8	18	8	3
ENSDARG00000001303	psmb8a	15	23	18	14	7	13	11	10	8	13	33	7
ENSDARG00000001313	g2e3	227	124	127	81	142	231	143	188	162	88	329	287
ENSDARG00000001354	slc6a22.2	151	82	78	25	57	73	9	49	67	7	65	46
ENSDARG00000001414	mctp2a	60	28	11	8	33	45	42	30	34	0	45	47
ENSDARG00000001431	actn3b	86	50	50	31	57	61	22	31	40	41	63	59
ENSDARG00000001437	slc2a1a	62	33	29	25	31	39	6	34	42	12	38	18
ENSDARG00000001442	inppl1b	14	11	19	15	31	53	13	27	33	0	20	17
ENSDARG00000001452	adam8a	87	68	64	42	67	106	57	60	86	23	140	80
ENSDARG00000001463	tdh2	228	135	64	40	88	86	127	130	96	57	132	141
ENSDARG00000001470	mhc1zea	15	10	9	4	12	12	1	9	4	0	8	11
ENSDARG00000001549	sp3a	569	272	278	193	289	416	219	238	351	118	496	586
ENSDARG00000001557	tomm34	233	116	176	99	180	198	198	184	310	162	277	364
ENSDARG00000001558	kifc1	216	90	46	44	64	115	60	85	80	39	166	136
ENSDARG00000001559	csmd2	74	48	109	37	65	92	53	36	39	109	60	53
ENSDARG00000001572	prf1.3	24	7	15	9	15	18	2	2	7	0	13	3
ENSDARG00000001578	echs1	246	100	112	63	81	167	62	114	110	25	201	123
ENSDARG00000001621	nfyal	430	266	330	246	527	710	581	597	578	241	802	722
ENSDARG00000001634	kirrel1a	161	95	118	90	137	176	111	211	211	131	183	150
ENSDARG00000001656	psmb13a	16	14	30	8	14	34	6	9	28	8	22	14
ENSDARG00000001676	gpm6bb	220	150	94	60	99	145	67	64	130	53	210	207
ENSDARG00000001686	uckl1a	55	36	57	37	69	77	25	38	62	15	78	47
ENSDARG00000001712	si:ch211-247n2.1	22	17	32	13	16	19	12	0	10	12	3	2
ENSDARG00000001721	oc90	47	26	9	10	11	21	9	1	13	38	4	8
ENSDARG00000001729	strn3	48	19	24	7	17	28	2	0	7	30	14	16
ENSDARG00000001733	gulp1a	39	26	62	16	41	38	26	36	23	19	25	31
ENSDARG00000001734	fkbp8	50	35	39	26	52	73	35	89	66	24	98	54
ENSDARG00000001754	noc2l	110	77	23	14	47	66	42	30	32	32	87	45
ENSDARG00000001760	tnxba	59	40	47	25	42	44	55	30	19	40	28	43
ENSDARG00000001767	slc29a2	91	50	41	29	40	80	44	33	76	56	122	93
ENSDARG00000001769	ptpra	248	195	174	98	199	287	129	173	219	170	260	224
ENSDARG00000001771	otol1a	6	13	5	2	3	7	0	0	5	0	1	0
ENSDARG00000001776	stim2b	293	143	176	85	164	192	128	163	213	90	204	239
ENSDARG00000001777	nup155	69	55	45	26	54	69	37	54	36	45	57	38
ENSDARG00000001781	tspan11	8	11	6	1	6	19	5	0	0	0	12	0
ENSDARG00000001782	prkacba	172	93	14	17	32	37	25	32	61	26	121	130
ENSDARG00000001785	irx2a	80	26	64	39	55	61	47	64	48	34	76	58
ENSDARG00000001788	atp5po	185	103	73	31	111	129	74	83	73	60	120	165
ENSDARG00000001803	kcnh6a	96	69	36	25	54	72	3	11	21	22	21	17
ENSDARG00000001804	zgc:112148	26	18	23	32	17	28	41	18	7	11	25	70
ENSDARG00000001807	tnfrsf21	311	154	84	56	146	173	100	111	108	109	219	204
ENSDARG00000001817	zmp:0000000521	569	303	249	169	210	391	380	459	421	118	617	600
ENSDARG00000001825	cfap43	77	36	36	15	76	80	23	17	51	80	28	55
ENSDARG00000001829	zgc:112982	102	44	74	42	74	122	67	38	62	6	125	52
ENSDARG00000001835	nalcn	46	36	69	30	91	77	114	48	97	26	109	90
ENSDARG00000001857	aff4	923	441	393	200	441	610	418	551	581	239	678	844
ENSDARG00000001859	dbx1b	61	24	89	51	95	105	62	47	131	39	104	112
ENSDARG00000001873	phgdh	25	9	27	7	9	18	11	1	2	12	16	11
ENSDARG00000001879	nav2b	20	23	26	23	54	70	0	6	51	23	13	15
ENSDARG00000001880	stx3a	189	109	87	44	77	101	81	81	76	87	167	225
ENSDARG00000001881	cacnb3a	35	15	22	20	19	20	16	4	18	0	6	16
ENSDARG00000001882	kbtbd12	26	21	50	29	27	43	15	20	15	17	23	10
ENSDARG00000001888	ppm1ba	190	87	70	58	104	139	77	74	128	71	157	184
ENSDARG00000001889	tuba1a	96	51	65	50	93	94	136	130	176	50	88	100
ENSDARG00000001890	stt3b	44	32	34	14	33	56	42	22	57	25	18	35
ENSDARG00000001891	syt14b	71	47	69	50	83	88	19	29	38	64	70	136
ENSDARG00000001897	man2b1	63	37	44	23	31	32	31	45	42	18	85	49
ENSDARG00000001898	manea	789	432	398	242	416	560	411	534	524	210	841	739
ENSDARG00000001906	si:dkey-247m21.3	90	54	95	41	82	67	27	22	88	70	52	60
ENSDARG00000001909	vill	35	25	17	14	15	24	4	19	7	26	23	21
ENSDARG00000001910	rorab	521	286	276	156	473	588	383	407	495	294	787	752
ENSDARG00000001912	drd4-rs	10	12	15	4	19	24	4	10	19	0	8	14
ENSDARG00000001913	palmda	54	27	25	19	38	36	7	16	35	8	22	36
ENSDARG00000001929	pink1	82	52	57	38	44	77	48	55	35	98	47	38
ENSDARG00000001930	klhl15	156	120	70	40	90	122	60	78	144	89	104	135
ENSDARG00000001933	prkag2b	80	45	66	47	68	130	73	46	98	51	167	181
ENSDARG00000001939	b3gat3	97	91	56	25	71	61	50	44	46	43	81	54
ENSDARG00000001940	dnajc1	153	68	76	59	68	89	80	56	137	103	124	158
ENSDARG00000001953	pfkfb3	128	74	113	55	140	185	111	127	149	132	187	253
ENSDARG00000001968	dock5	184	79	90	62	94	155	31	112	115	80	194	179
ENSDARG00000001969	txlng	55	35	35	24	46	67	4	20	7	54	33	29
ENSDARG00000001971	cthrc1b	4	5	6	10	6	42	8	12	11	7	27	8
ENSDARG00000001975	hsd11b2	84	63	81	41	73	95	59	40	65	50	76	78
ENSDARG00000001976	fkbp16	106	63	15	6	20	38	22	37	37	63	7	21
ENSDARG00000001993	myhb	20	11	6	5	15	32	0	17	0	3	5	12
ENSDARG00000001994	stxbp1a	34	18	31	40	48	116	57	73	76	38	47	54
ENSDARG00000001999	adamts18	44	37	27	24	24	22	13	25	4	4	23	10
ENSDARG00000002002	lmcd1	59	39	62	33	55	56	23	53	47	44	33	39
ENSDARG00000002006	rxrbb	105	67	105	67	73	134	43	72	63	94	168	138
ENSDARG00000002013	grb10a	452	223	234	186	220	354	178	215	250	199	400	328
ENSDARG00000002016	ppil2	55	36	16	22	37	73	14	9	29	30	20	32
ENSDARG00000002020	rictorb	179	68	139	89	91	155	49	68	161	50	211	153
ENSDARG00000002021	pygb	454	241	172	131	212	288	186	194	223	143	295	304
ENSDARG00000002026	qkib	57	46	63	23	66	77	26	26	29	47	45	38
ENSDARG00000002031	tox4a	147	76	81	46	82	162	60	50	73	46	84	122
ENSDARG00000002037	pfkfb2b	184	116	127	87	144	215	113	72	155	116	182	165
ENSDARG00000002060	brf2	32	40	45	14	35	29	16	25	58	25	55	33
ENSDARG00000002071	adss	19	8	42	3	29	67	22	27	44	43	25	40
ENSDARG00000002082	csnk2a1	446	278	209	127	278	374	275	375	391	137	412	535
ENSDARG00000002084	lamb2	249	147	103	75	113	207	114	92	154	44	249	291
ENSDARG00000002127	stam	129	67	63	73	89	109	21	25	95	26	86	92
ENSDARG00000002128	cwf19l1	15	11	21	16	13	29	4	10	15	42	17	20
ENSDARG00000002131	celf2	55	44	72	70	158	139	87	124	75	55	161	180
ENSDARG00000002165	psme1	322	175	50	45	85	74	23	76	56	50	89	24
ENSDARG00000002167	cacnb1	481	210	149	143	271	335	318	405	218	159	346	373
ENSDARG00000002168	tra2b	44	33	32	16	63	63	25	19	0	63	52	50
ENSDARG00000002172	aplnra	99	66	57	33	49	74	34	34	54	29	55	41
ENSDARG00000002174	itfg2	87	62	49	34	44	65	23	32	61	66	46	58
ENSDARG00000002190	chmp2bb	282	181	246	157	212	367	204	270	336	152	495	503
ENSDARG00000002192	aspn	15	14	9	3	9	18	0	8	0	0	9	12
ENSDARG00000002193	rho	11	9	9	3	16	37	2	5	29	14	8	11
ENSDARG00000002194	rhd	1992	1083	643	413	837	1050	819	975	885	335	1448	1508
ENSDARG00000002196	bach1b	398	228	301	195	439	433	372	494	506	162	619	681
ENSDARG00000002197	pygl	53	30	20	33	50	64	3	2	68	20	44	55
ENSDARG00000002210	stk25a	49	19	32	32	53	55	6	34	13	43	27	34
ENSDARG00000002215	rtca	17	18	22	16	20	40	11	8	6	0	8	16
ENSDARG00000002216	tbx3a	156	71	13	15	35	11	9	2	4	10	26	12
ENSDARG00000002217	scocb	122	84	49	41	39	66	38	79	66	30	83	112
ENSDARG00000002220	zgc:103692	172	107	60	46	114	126	169	182	146	67	225	158
ENSDARG00000002230	sypb	71	47	37	14	52	93	69	50	72	47	64	81
ENSDARG00000002235	mmp14a	32	16	17	14	34	19	13	3	19	32	15	33
ENSDARG00000002240	psmb6	45	33	42	14	34	52	17	21	28	33	47	51
ENSDARG00000002241	kcna2a	12	13	41	22	56	83	81	103	123	17	101	112
ENSDARG00000002249	tbxas1	104	54	23	21	45	52	15	25	68	17	69	86
ENSDARG00000002255	epb41l3a	79	48	74	46	89	104	19	14	25	19	55	37
ENSDARG00000002264	mrpl41	221	108	114	82	141	186	57	90	169	84	140	180
ENSDARG00000002267	dcaf13	105	71	88	34	60	119	50	67	125	28	105	91
ENSDARG00000002271	zfand5b	481	220	414	216	420	625	322	559	660	215	836	619
ENSDARG00000002285	mcoln1a	217	143	98	52	106	142	180	101	91	52	140	160
ENSDARG00000002293	si:ch211-197g15.6	16	8	1	14	10	17	5	3	0	0	4	2
ENSDARG00000002295	si:dkey-21p1.3	5	3	13	4	9	1	0	0	0	9	7	13
ENSDARG00000002298	ankrd22	18	6	9	22	19	14	4	4	27	22	26	19
ENSDARG00000002299	arsh	99	48	75	55	83	137	27	70	55	47	91	108
ENSDARG00000002300	p2rx2	9	8	6	2	9	16	0	0	5	0	0	6
ENSDARG00000002304	gins2	226	112	87	48	96	95	63	106	97	89	190	202
ENSDARG00000002305	me3	157	81	89	51	168	166	94	166	128	66	160	269
ENSDARG00000002330	lhx8a	159	66	77	50	71	100	38	73	56	32	64	86
ENSDARG00000002332	frmd6	422	222	302	197	313	573	347	502	611	238	555	486
ENSDARG00000002333	fam102bb	156	73	43	13	39	73	67	49	54	36	62	38
ENSDARG00000002336	dlc	139	77	103	82	108	164	72	102	126	101	135	89
ENSDARG00000002339	sgf29	27	27	31	14	19	19	19	26	28	4	46	14
ENSDARG00000002344	tubb4b	972	545	407	303	615	826	680	935	627	500	1092	1298
ENSDARG00000002347	cyp11a1	10	17	7	4	8	36	4	1	7	15	7	6
ENSDARG00000002353	tagapa	164	88	88	50	99	122	79	92	100	39	298	284
ENSDARG00000002355	shpk	33	24	19	16	35	34	10	6	19	11	32	16
ENSDARG00000002362	ubald1a	288	146	174	125	202	266	156	301	323	150	361	378
ENSDARG00000002365	cers5	168	87	123	83	152	165	127	97	103	125	196	192
ENSDARG00000002369	si:ch211-202a12.4	137	77	52	47	90	87	71	94	45	127	159	157
ENSDARG00000002377	mief2	232	111	104	70	126	196	84	106	78	67	202	226
ENSDARG00000002385	atm	56	26	30	38	37	35	10	40	49	20	49	31
ENSDARG00000002391	tlcd1	6	9	28	16	25	42	11	5	44	0	34	22
ENSDARG00000002394	ugt5d1	27	21	18	18	30	29	13	4	21	35	15	20
ENSDARG00000002396	cry-dash	488	289	106	92	138	214	127	219	199	137	332	331
ENSDARG00000002401	gale	56	34	62	34	71	89	64	72	42	71	80	54
ENSDARG00000002402	ercc3	146	110	100	62	125	164	64	103	134	63	137	118
ENSDARG00000002403	nusap1	397	258	167	123	222	280	220	267	246	167	306	400
ENSDARG00000002405	si:ch211-225b11.1	447	214	112	99	136	189	160	135	314	132	290	272
ENSDARG00000002445	prdm1a	74	41	8	6	10	41	29	34	32	8	44	70
ENSDARG00000002463	arhgef37	86	62	74	17	89	86	22	41	60	37	64	101
ENSDARG00000002467	rdh14b	156	97	79	49	99	120	43	93	120	82	144	142
ENSDARG00000002479	ercc6l	75	58	64	37	55	80	50	67	97	50	55	84
ENSDARG00000002483	wnt7ab	41	17	29	30	46	41	2	32	35	67	27	31
ENSDARG00000002487	noc3l	11	5	13	7	30	23	0	5	13	0	7	2
ENSDARG00000002494	itgb6	11	7	17	26	16	19	9	21	29	29	23	25
ENSDARG00000002506	zgc:92818	186	110	70	70	92	158	73	57	96	33	136	159
ENSDARG00000002507	itga10	14	7	12	4	12	4	3	2	8	11	1	12
ENSDARG00000002508	ankrd33ab	20	16	11	10	18	6	1	9	22	13	0	10
ENSDARG00000002509	zgc:153911	175	106	61	55	55	91	74	79	122	42	131	90
ENSDARG00000002510	dmbx1b	88	42	51	40	16	32	17	6	48	39	55	64
ENSDARG00000002523	hsdl2	154	92	166	93	180	286	98	153	178	77	224	266
ENSDARG00000002533	adora2b	123	44	45	41	65	104	42	57	82	26	113	100
ENSDARG00000002536	tm9sf4	132	77	68	47	89	128	84	111	107	59	150	166
ENSDARG00000002538	smu1a	5	4	8	6	9	5	0	13	12	4	0	3
ENSDARG00000002546	rundc3ab	81	46	38	53	70	83	45	67	54	57	109	45
ENSDARG00000002549	eif3eb	8	8	7	5	14	8	13	6	5	20	0	2
ENSDARG00000002552	mapkapk2a	186	93	44	25	68	85	68	94	88	50	115	119
ENSDARG00000002564	syngr1a	78	63	72	38	83	110	40	79	78	49	100	87
ENSDARG00000002571	tmod2	572	322	295	186	318	408	286	416	385	128	534	551
ENSDARG00000002576	cabp5a	41	29	7	15	10	32	4	12	3	46	12	6
ENSDARG00000002582	tbx15	97	72	67	42	46	69	21	43	43	42	50	54
ENSDARG00000002587	dpysl3	202	143	126	102	141	175	80	121	216	160	178	130
ENSDARG00000002589	mylpfb	96	58	50	34	56	56	50	40	72	107	89	97
ENSDARG00000002591	ruvbl1	325	166	190	137	198	311	147	190	263	96	330	325
ENSDARG00000002593	slc45a2	27	23	50	36	39	53	12	17	48	41	43	48
ENSDARG00000002597	pabpc1l	5	6	6	4	16	13	0	0	0	9	0	6
ENSDARG00000002600	pcsk1	26	23	33	38	82	72	60	80	108	62	67	68
ENSDARG00000002601	irx7	175	124	92	26	52	63	29	36	35	78	62	99
ENSDARG00000002607	unm_sa1614	86	56	68	21	58	82	104	63	88	48	114	120
ENSDARG00000002609	rnf145a	207	109	55	29	100	129	44	44	44	27	106	76
ENSDARG00000002634	b4galt1	31	29	21	11	18	27	8	4	0	20	14	7
ENSDARG00000002635	zgc:85722	25	19	43	17	48	68	36	75	12	61	45	28
ENSDARG00000002642	sh3gl1b	166	79	96	58	105	156	68	96	149	25	129	148
ENSDARG00000002644	rgs5a	15	20	46	34	28	51	26	46	19	16	14	20
ENSDARG00000002656	stxbp5a	95	49	56	66	116	138	91	82	75	78	202	190
ENSDARG00000002659	mapre1b	158	76	57	63	66	149	57	99	169	39	155	219
ENSDARG00000002663	optn	114	77	163	110	284	302	264	257	371	141	427	444
ENSDARG00000002666	kcnj1b	14	20	23	9	27	25	7	34	28	32	20	9
ENSDARG00000002670	zgc:113944	95	54	53	38	53	93	68	45	43	32	93	116
ENSDARG00000002682	tbcela	374	172	159	77	161	203	132	155	201	88	321	270
ENSDARG00000002690	rabif	29	17	14	6	20	33	7	6	10	3	9	38
ENSDARG00000002696	gnb3b	68	63	45	27	43	79	18	12	13	49	38	37
ENSDARG00000002701	rasl12	15	16	14	9	17	37	16	1	19	23	5	23
ENSDARG00000002707	her11	46	28	24	24	12	25	9	18	7	16	21	23
ENSDARG00000002710	ncl	31	22	30	18	22	47	20	15	52	31	43	11
ENSDARG00000002720	utp15	50	22	20	7	15	29	13	2	7	24	26	23
ENSDARG00000002728	kiss1ra	10	10	32	29	42	56	25	46	20	59	32	36
ENSDARG00000002731	sdc2	25	19	14	12	21	27	10	11	29	11	32	16
ENSDARG00000002732	spon2b	29	17	28	20	34	49	16	3	9	6	30	21
ENSDARG00000002745	tdh	872	406	377	244	476	517	471	446	438	175	832	753
ENSDARG00000002748	sema6d	477	252	136	116	210	284	167	209	119	84	353	372
ENSDARG00000002750	phf20a	97	51	57	48	55	114	59	30	45	36	72	98
ENSDARG00000002754	pdcd2l	196	144	114	84	210	221	157	176	207	66	296	222
ENSDARG00000002758	dedd1	248	178	163	111	239	257	142	177	258	123	297	236
ENSDARG00000002760	gdf5	68	56	68	33	59	111	26	59	40	100	63	57
ENSDARG00000002764	miox	20	11	9	8	22	13	1	22	8	35	18	14
ENSDARG00000002768	pvalb2	28	12	8	9	11	18	11	7	0	0	19	21
ENSDARG00000002771	si:ch211-48m9.1	52	32	26	32	47	68	19	5	58	58	8	17
ENSDARG00000002773	htr1fa	4	4	17	1	9	25	8	0	35	6	5	2
ENSDARG00000002779	pdx1	68	29	102	36	84	74	22	29	59	23	37	62
ENSDARG00000002787	tle3a	1279	759	531	342	720	1093	815	904	995	419	1263	1185
ENSDARG00000002790	ap2m1a	168	116	85	53	96	110	133	171	137	50	162	219
ENSDARG00000002791	atp1a1a.1	583	302	216	151	235	355	168	274	219	168	464	387
ENSDARG00000002792	arcn1a	191	98	66	41	52	104	23	43	88	12	122	97
ENSDARG00000002795	meis3	195	85	72	52	74	82	57	31	116	45	80	59
ENSDARG00000002798	cog8	13	8	15	8	12	16	6	8	14	18	4	0
ENSDARG00000002816	rasgrf2b	3	1	0	6	4	19	0	0	0	9	0	6
ENSDARG00000002826	cep57l1	111	69	62	32	69	84	51	57	85	31	62	74
ENSDARG00000002830	trmt2a	15	14	13	10	7	15	4	4	20	5	40	10
ENSDARG00000002831	col4a4	61	31	34	7	44	18	4	9	20	55	21	8
ENSDARG00000002840	si:dkey-28b4.8	843	393	559	372	900	1238	713	953	825	299	1043	1201
ENSDARG00000002847	fndc1	124	90	77	48	65	93	62	45	58	36	71	61
ENSDARG00000002872	zgc:113210	32	16	20	15	25	30	29	2	16	7	13	29
ENSDARG00000002877	reps1	411	199	173	121	205	216	131	173	298	99	275	306
ENSDARG00000002880	vps50	179	65	34	15	18	19	2	9	51	36	7	15
ENSDARG00000002894	aven	23	34	8	12	18	32	17	7	27	36	31	26
ENSDARG00000002897	si:ch211-160o17.2	5	5	9	4	15	12	4	0	21	0	2	0
ENSDARG00000002909	tjp3	74	73	68	45	107	178	50	88	89	102	139	169
ENSDARG00000002912	adipor1a	31	12	19	8	12	15	4	13	11	20	2	28
ENSDARG00000002916	sec31b	34	31	42	20	55	47	20	17	72	19	23	11
ENSDARG00000002917	gls2b	19	12	26	12	18	28	19	15	20	11	23	31
ENSDARG00000002933	gbx2	212	124	113	90	98	94	68	48	172	68	99	104
ENSDARG00000002937	meis1a	25	14	24	20	42	53	25	38	50	28	33	50
ENSDARG00000002945	bgnb	39	16	24	6	6	36	6	15	11	7	17	6
ENSDARG00000002947	abcd3b	82	49	44	28	43	91	19	39	90	24	73	55
ENSDARG00000002949	ppp6c	129	73	92	39	83	95	88	58	108	75	167	130
ENSDARG00000002952	smo	27	21	22	12	28	52	7	15	57	27	13	16
ENSDARG00000002956	si:dkey-32n7.4	9	23	8	16	9	26	14	16	42	13	42	51
ENSDARG00000002959	gpr34b	2	1	6	3	3	23	0	11	5	0	0	2
ENSDARG00000002967	pdap1b	35	29	14	10	15	48	20	19	47	24	45	29
ENSDARG00000002968	a1cf	74	62	9	11	30	59	22	7	0	11	32	62
ENSDARG00000002970	ss18	288	167	109	85	150	249	69	120	126	104	257	239
ENSDARG00000002971	phc1	164	78	120	70	138	161	124	98	97	49	172	229
ENSDARG00000002986	gda	8	14	4	2	3	29	1	7	36	20	20	32
ENSDARG00000002988	tnnt2d	3	5	5	6	4	4	0	13	0	9	1	0
ENSDARG00000002991	cep135	338	210	162	90	156	219	99	109	231	48	280	230
ENSDARG00000002994	itpkca	286	145	203	124	183	285	103	203	200	135	285	224
ENSDARG00000003008	prkcea	23	16	15	6	18	31	0	35	0	30	31	15
ENSDARG00000003017	ube2al	271	167	134	72	143	206	140	190	212	110	237	227
ENSDARG00000003021	hdac8	86	47	88	70	106	145	47	87	107	93	125	98
ENSDARG00000003022	limk1b	234	116	96	58	57	79	37	100	100	50	171	102
ENSDARG00000003027	scnm1	78	41	24	9	31	19	43	40	73	19	66	79
ENSDARG00000003032	eif4a1b	480	235	238	140	339	488	260	316	266	217	481	452
ENSDARG00000003035	hspa9	6	6	23	16	9	15	26	37	39	17	45	29
ENSDARG00000003041		70	54	18	9	31	21	3	13	22	12	17	10
ENSDARG00000003046	sorbs2a	13	15	13	9	23	19	0	6	18	12	20	15
ENSDARG00000003054	tacr3l	20	16	11	5	8	22	5	1	36	11	6	1
ENSDARG00000003058	fgfr1op	141	72	67	41	91	171	38	65	103	64	108	105
ENSDARG00000003068	gorasp1a	81	30	45	46	61	65	48	42	53	14	42	42
ENSDARG00000003069	btbd7	58	47	61	19	61	91	22	34	75	90	64	57
ENSDARG00000003077	si:ch73-111m19.2	35	19	26	13	26	45	7	6	7	15	28	5
ENSDARG00000003081	mybphb	8	4	15	11	22	12	3	17	0	55	55	16
ENSDARG00000003084	spire2	110	66	60	27	35	93	40	29	65	37	38	31
ENSDARG00000003085	stambpl1	102	67	63	67	103	143	80	55	109	54	108	127
ENSDARG00000003087	ubxn6	127	55	68	40	72	118	43	70	34	69	140	150
ENSDARG00000003091	oclnb	106	40	31	15	21	33	6	16	25	17	17	14
ENSDARG00000003098	kdm5bb	358	191	110	78	137	193	189	190	144	92	309	350
ENSDARG00000003109	rcan1a	217	90	102	81	111	196	81	127	176	119	180	146
ENSDARG00000003113	ada	45	18	40	43	68	62	48	74	67	24	165	96
ENSDARG00000003127	zgc:123105	428	312	233	131	338	373	286	229	398	164	512	478
ENSDARG00000003132	apip	31	29	31	31	43	59	25	40	46	21	50	67
ENSDARG00000003142	dachc	138	70	63	31	53	73	28	29	70	42	55	68
ENSDARG00000003146	si:dkey-27m7.4	52	38	47	23	30	48	11	1	24	2	26	17
ENSDARG00000003151	skp1	16	11	13	16	24	27	1	13	11	0	17	3
ENSDARG00000003153	nudt21	80	33	42	20	47	79	11	14	46	30	47	68
ENSDARG00000003157	nfkbil1	26	23	17	16	9	31	13	17	22	8	33	7
ENSDARG00000003165	nr2f6b	125	56	62	49	75	79	47	53	129	29	72	104
ENSDARG00000003167	mlst8	33	25	39	12	24	57	33	14	37	14	40	28
ENSDARG00000003169	magi1b	189	102	152	110	172	246	112	95	252	77	188	164
ENSDARG00000003175	stx5al	178	99	99	55	122	122	84	129	121	61	193	152
ENSDARG00000003181	sult1st4	9	13	5	4	12	13	2	5	4	19	35	36
ENSDARG00000003189	psmd1	152	66	81	48	91	107	33	88	133	52	97	100
ENSDARG00000003193	rassf7b	37	54	69	28	65	93	24	36	61	87	69	35
ENSDARG00000003197	wdr21	74	69	61	39	73	99	37	64	35	29	103	97
ENSDARG00000003200	foxm1	274	178	157	83	150	248	142	94	126	124	288	232
ENSDARG00000003203	rhcga	19	18	32	5	15	48	8	26	45	28	20	17
ENSDARG00000003205	ngly1	29	20	27	23	30	28	12	8	36	18	32	52
ENSDARG00000003206	chchd6a	293	157	66	60	120	160	158	123	154	37	210	233
ENSDARG00000003207	mterf3	182	121	97	57	78	100	55	81	71	74	155	166
ENSDARG00000003208	pomk	83	32	65	47	53	147	38	34	57	51	71	69
ENSDARG00000003210	si:ch73-86n2.1	6	8	3	7	14	19	13	3	1	20	4	4
ENSDARG00000003213	naa15a	149	57	64	60	71	93	93	54	80	44	100	105
ENSDARG00000003216	anxa2a	8	7	19	13	12	26	6	8	37	8	22	32
ENSDARG00000003217	urb2	81	48	28	8	43	63	24	33	37	46	64	114
ENSDARG00000003219	bin2a	426	193	150	76	251	313	224	259	305	113	319	280
ENSDARG00000003229	gdf9	12	5	9	2	3	9	0	6	3	13	3	7
ENSDARG00000003235	nup88	70	56	33	23	68	54	29	19	28	9	23	67
ENSDARG00000003244	gbp3	15	7	7	7	18	13	6	14	5	4	6	9
ENSDARG00000003250	pik3cd	46	17	14	11	28	27	30	25	8	20	29	43
ENSDARG00000003251	zbtb22b	168	86	55	55	83	105	16	48	85	12	91	107
ENSDARG00000003257	zgc:101559	88	51	84	63	102	117	61	71	88	54	164	121
ENSDARG00000003259	loxa	28	16	20	7	25	15	2	7	6	28	8	24
ENSDARG00000003269	clcn3	12	7	16	6	19	29	1	13	11	25	8	2
ENSDARG00000003270	dhps	28	24	47	18	28	34	6	32	35	14	19	16
ENSDARG00000003281	pik3ip1	404	222	126	72	142	130	87	89	216	88	173	212
ENSDARG00000003287	wdr12	103	70	69	36	93	98	55	34	46	70	87	90
ENSDARG00000003290	dab1b	13	7	10	13	20	31	0	5	4	8	5	0
ENSDARG00000003293	sox9a	176	133	137	79	152	182	101	76	122	62	157	149
ENSDARG00000003303	stc1	100	78	74	56	74	126	10	34	119	5	58	65
ENSDARG00000003307	stx16	146	103	72	49	89	79	32	45	51	110	51	63
ENSDARG00000003308	emc2	181	96	72	38	66	93	49	68	63	68	124	99
ENSDARG00000003311	pank2	309	155	162	118	278	345	256	350	355	145	421	310
ENSDARG00000003313	eps8l1b	2	0	3	1	6	17	0	0	0	0	1	14
ENSDARG00000003320	fam91a1	97	70	58	29	112	121	54	86	82	66	155	140
ENSDARG00000003326	cacng5a	19	14	41	23	30	23	1	0	16	29	28	11
ENSDARG00000003328	slf2	41	14	29	23	47	55	12	6	29	50	46	8
ENSDARG00000003344	trpc2b	6	1	12	2	9	5	0	0	4	0	0	7
ENSDARG00000003373	commd2	14	4	7	2	8	9	24	23	15	2	42	22
ENSDARG00000003375	gng12a	231	150	166	92	208	281	97	102	167	97	353	409
ENSDARG00000003380	si:dkey-275b16.2	91	53	89	40	119	175	79	70	123	55	168	123
ENSDARG00000003381	si:ch211-266g18.6	40	34	44	33	53	43	15	3	22	55	38	30
ENSDARG00000003382	cwc25	50	42	37	41	37	49	13	6	21	21	42	58
ENSDARG00000003383	asb8	58	40	28	22	17	42	12	15	31	17	19	16
ENSDARG00000003395	col4a3	6	1	14	1	24	15	10	0	0	7	0	3
ENSDARG00000003398	rbpja	928	581	538	323	633	819	545	708	534	248	1064	1116
ENSDARG00000003399	fgf8a	59	45	27	22	51	46	20	24	9	16	47	43
ENSDARG00000003403	tenm1	81	47	59	35	87	79	26	34	63	78	74	113
ENSDARG00000003411	foxa2	29	12	34	15	29	52	20	12	5	40	18	32
ENSDARG00000003414	capslb	7	5	7	4	10	11	4	5	2	8	10	5
ENSDARG00000003420	chrna5	17	5	13	8	19	21	4	9	7	16	4	3
ENSDARG00000003421	igf2bp2a	178	98	110	72	100	161	85	122	120	190	208	156
ENSDARG00000003429	hnrnpdl	77	56	53	32	53	59	44	40	53	16	68	70
ENSDARG00000003444	dhrs7	93	69	101	43	115	206	132	147	214	115	251	259
ENSDARG00000003446	ippk	477	252	275	159	403	573	349	470	335	146	686	704
ENSDARG00000003449	pde10a	222	131	139	69	146	254	81	163	227	164	242	195
ENSDARG00000003462	fech	62	17	19	7	39	51	19	28	20	4	37	29
ENSDARG00000003469	neurod4	117	91	86	31	58	56	42	92	70	68	68	38
ENSDARG00000003475	sult1st5	19	6	20	7	18	22	0	6	8	13	11	16
ENSDARG00000003486	ppp1caa	415	296	196	160	301	417	294	286	297	103	443	506
ENSDARG00000003487	nup93	98	44	51	26	57	91	40	45	90	33	74	65
ENSDARG00000003495	madd	129	94	126	77	101	101	90	115	138	52	160	142
ENSDARG00000003512	anks1b	362	187	69	54	77	157	22	82	73	78	87	83
ENSDARG00000003517	impa1	16	13	5	16	15	19	6	5	0	0	8	10
ENSDARG00000003519	aprt	36	19	22	13	21	32	7	14	19	20	39	37
ENSDARG00000003520	tbc1d14	156	74	144	91	218	249	118	131	123	80	249	283
ENSDARG00000003526	psma5	439	285	137	120	247	262	199	278	234	92	400	354
ENSDARG00000003527	mak16	308	191	178	120	209	213	153	201	183	93	387	411
ENSDARG00000003531	tcea1	159	102	154	86	158	230	84	157	93	125	218	239
ENSDARG00000003533	col8a1b	10	0	7	5	15	7	7	1	10	0	10	1
ENSDARG00000003544	adarb1b	0	4	13	11	12	16	0	3	12	22	15	5
ENSDARG00000003553	gnrhr2	47	25	17	11	22	18	30	8	33	33	14	5
ENSDARG00000003564	dohh	67	34	63	19	46	59	25	11	0	11	29	52
ENSDARG00000003573	dctn5	206	112	91	47	98	145	80	81	115	51	156	139
ENSDARG00000003576	klhl32	116	60	106	64	112	120	54	47	121	59	101	109
ENSDARG00000003584	pla2g7	231	120	140	84	162	226	94	192	176	156	295	335
ENSDARG00000003592	surf1	124	64	32	41	54	89	26	62	92	36	120	127
ENSDARG00000003599	rpl3	508	290	211	127	269	301	254	312	281	129	498	494
ENSDARG00000003607	nr2f6a	527	295	227	147	244	414	228	225	349	167	368	360
ENSDARG00000003616	arih1	132	87	120	73	113	170	85	61	110	119	149	143
ENSDARG00000003631	clockb	118	67	75	52	112	150	84	82	96	60	107	130
ENSDARG00000003632	zgc:172270	17	11	15	10	34	33	0	10	8	24	30	31
ENSDARG00000003635	mogat3b	73	45	17	15	49	57	47	35	23	34	85	65
ENSDARG00000003641	tfg	140	84	120	93	117	172	59	77	111	151	181	142
ENSDARG00000003642	zfyve19	227	161	132	84	202	199	114	210	183	25	227	335
ENSDARG00000003655	tmem59l	59	25	26	22	49	59	47	70	42	39	66	64
ENSDARG00000003675	cryl1	59	38	11	7	23	24	25	8	17	5	11	9
ENSDARG00000003680	runx1t1	262	133	96	82	103	151	87	58	133	111	114	114
ENSDARG00000003681	eif5	326	192	150	110	196	300	184	244	213	109	282	355
ENSDARG00000003684	obsl1a	60	26	64	24	28	51	7	42	28	31	41	81
ENSDARG00000003693	hars	46	31	56	19	52	75	41	41	29	31	63	64
ENSDARG00000003695	vdac3	182	94	96	65	150	171	74	81	94	70	219	180
ENSDARG00000003697	slc5a8l	8	3	4	2	1	18	3	0	0	0	8	15
ENSDARG00000003699	atp7a	446	244	194	130	278	303	251	235	265	105	443	469
ENSDARG00000003701	cldng	101	55	50	25	52	49	25	32	27	32	39	58
ENSDARG00000003705	prnprs3	129	115	57	32	68	67	28	86	63	7	65	91
ENSDARG00000003706	ryr2b	21	21	15	12	20	17	5	6	24	0	27	7
ENSDARG00000003732	mitfa	107	66	176	92	216	196	116	98	164	42	162	232
ENSDARG00000003749	polb	403	204	175	100	171	192	141	236	181	88	444	409
ENSDARG00000003750	pfas	314	182	133	100	140	208	131	105	126	59	192	160
ENSDARG00000003751	lats1	254	133	131	61	109	164	92	149	152	33	214	198
ENSDARG00000003754	tspan2a	25	14	119	76	92	154	118	94	176	74	85	68
ENSDARG00000003757	cnpy1	330	147	194	136	229	349	227	229	219	146	387	441
ENSDARG00000003769	tada2b	87	32	11	15	18	14	7	10	24	33	43	23
ENSDARG00000003776	pip4k2aa	259	117	60	24	88	127	70	92	52	41	131	119
ENSDARG00000003779	ctnnd2b	76	50	73	48	100	173	78	108	97	39	131	152
ENSDARG00000003789	dennd5b	119	50	89	50	83	146	68	75	122	46	148	127
ENSDARG00000003795	idh2	139	65	85	55	104	104	92	69	121	63	153	95
ENSDARG00000003797	asb2a.1	26	16	32	13	28	30	2	4	19	26	8	36
ENSDARG00000003803		7	7	18	6	18	20	8	11	19	2	8	8
ENSDARG00000003811	plxnb2a	82	57	126	75	130	190	87	117	133	72	169	191
ENSDARG00000003818	prkag1	127	80	56	27	51	53	32	42	48	48	61	51
ENSDARG00000003820	nr1d2a	106	77	108	77	99	186	143	178	219	70	285	259
ENSDARG00000003822	ankrd16	84	37	64	38	84	77	57	67	58	47	76	49
ENSDARG00000003827	snapc1b	155	98	77	38	66	88	25	66	67	21	113	78
ENSDARG00000003829	galnt2	239	127	132	94	161	274	255	234	247	122	305	367
ENSDARG00000003835	stom	60	47	40	42	68	100	43	88	67	27	87	89
ENSDARG00000003841	usb1	11	6	3	3	18	5	10	9	11	0	6	12
ENSDARG00000003845	chm	3	1	0	0	12	25	0	8	0	0	2	11
ENSDARG00000003846	mrpl21	62	44	26	24	25	41	30	18	46	10	44	66
ENSDARG00000003854	acsl1b	467	235	146	101	197	300	139	220	211	53	260	278
ENSDARG00000003860	cbx3a	126	66	58	32	70	84	60	77	107	57	121	114
ENSDARG00000003865	pard6b	395	183	171	98	161	259	117	200	216	95	247	292
ENSDARG00000003866	tm9sf2	145	69	111	51	86	139	97	75	89	83	172	150
ENSDARG00000003867	cdk20	28	18	28	13	42	22	17	20	22	11	17	33
ENSDARG00000003869	decr1	49	19	43	27	38	59	6	11	68	27	28	29
ENSDARG00000003872	ccdc102a	201	117	59	37	79	124	18	32	92	24	67	85
ENSDARG00000003899	zdhhc23b	27	14	39	24	24	29	7	26	32	0	42	16
ENSDARG00000003900	gpr61l	16	6	49	29	45	49	34	23	57	33	75	104
ENSDARG00000003902	ctsl.1	15	18	36	17	55	43	35	70	50	55	123	129
ENSDARG00000003903	hapln2	59	43	78	36	57	67	37	51	75	8	49	62
ENSDARG00000003904	sycp1	70	33	17	20	26	7	0	2	31	0	29	56
ENSDARG00000003909	ftr01	20	17	8	5	19	12	2	0	2	25	6	3
ENSDARG00000003910	med13b	464	283	211	111	295	335	229	344	364	181	569	401
ENSDARG00000003920	setb	360	170	138	68	209	221	164	213	142	130	319	349
ENSDARG00000003925	cx28.6	12	9	2	2	9	19	5	1	8	6	3	14
ENSDARG00000003927	cldn12	111	67	64	55	50	72	53	26	37	27	64	59
ENSDARG00000003931	cndp2	69	37	68	33	59	100	72	113	100	20	140	135
ENSDARG00000003934	nxnl2	225	86	105	70	75	174	77	95	242	35	160	143
ENSDARG00000003938	rpa1	227	111	83	35	73	116	35	116	78	49	162	120
ENSDARG00000003940	mtfr1l	158	90	64	56	80	152	73	131	99	44	144	152
ENSDARG00000003941	rrs1	26	17	30	8	24	44	4	15	16	15	16	29
ENSDARG00000003944	nmur1b	16	8	13	19	27	23	20	2	8	23	17	17
ENSDARG00000003952	pfn2	494	247	194	131	286	361	239	326	359	95	482	428
ENSDARG00000003961	parp3	218	111	172	127	192	216	80	104	171	100	362	328
ENSDARG00000003963	traf4a	278	155	180	115	270	350	146	210	229	111	296	308
ENSDARG00000003965	tlx1	129	99	84	48	68	101	20	11	33	28	46	40
ENSDARG00000003970	trim35-13	5	7	15	6	3	4	1	0	3	2	1	8
ENSDARG00000003971	isl2a	337	171	109	92	108	158	74	107	101	51	130	156
ENSDARG00000003973	chordc1a	100	56	79	37	82	57	63	64	52	36	83	118
ENSDARG00000003974	spoplb	183	100	81	32	88	76	56	72	120	29	91	100
ENSDARG00000003984	si:dkey-175g6.5	4	9	10	7	16	30	37	0	10	21	18	5
ENSDARG00000003989	crhr1	52	40	71	35	81	110	11	12	35	9	36	31
ENSDARG00000003991	fhl2b	3	5	11	3	6	3	4	4	0	8	5	12
ENSDARG00000003994	syt9a	25	9	16	12	11	28	0	8	17	4	10	13
ENSDARG00000003998	phyhipla	87	49	76	34	75	97	22	25	46	18	56	65
ENSDARG00000004015	adcyap1a	8	4	9	2	4	8	0	4	6	17	9	6
ENSDARG00000004017	spag1a	472	198	299	204	461	646	453	609	427	212	798	814
ENSDARG00000004018	si:ch211-236h17.3	383	252	166	69	162	211	154	151	155	120	398	358
ENSDARG00000004023	isl1	64	24	17	15	17	40	2	23	21	21	35	19
ENSDARG00000004034	arhgdig	66	47	38	47	78	115	54	63	56	25	144	141
ENSDARG00000004037	cog2	141	78	52	35	50	92	51	71	87	27	106	101
ENSDARG00000004046	phf6	499	242	166	114	213	268	133	282	196	136	304	412
ENSDARG00000004049	marcksa	439	232	173	121	238	353	346	355	355	68	438	478
ENSDARG00000004051		0	3	4	3	16	3	0	0	0	17	7	30
ENSDARG00000004055	uhrf1bp1l	41	34	42	28	47	42	37	13	61	20	19	33
ENSDARG00000004059	galk2	19	6	21	14	21	24	20	2	0	5	12	23
ENSDARG00000004060	bhlhe40	323	193	258	169	358	382	145	235	329	144	450	437
ENSDARG00000004074	bach2b	597	358	182	186	383	450	344	419	400	157	559	594
ENSDARG00000004078	acsl4a	497	318	194	132	203	265	270	245	250	109	418	345
ENSDARG00000004082	cx39.9	28	26	24	23	26	51	13	8	14	5	23	40
ENSDARG00000004094	acsbg2	805	421	220	147	297	430	371	503	352	177	554	464
ENSDARG00000004105	tie1	4	7	7	0	4	12	0	7	7	28	1	0
ENSDARG00000004111	esr1	65	31	63	25	61	71	17	14	50	46	32	19
ENSDARG00000004115	mgat4b	22	15	22	16	28	54	5	7	56	16	33	4
ENSDARG00000004131	rttn	271	140	144	73	173	162	44	112	133	94	220	193
ENSDARG00000004132	usp19	153	72	65	60	79	164	39	67	60	43	93	73
ENSDARG00000004141	zgc:92630	28	20	23	11	24	20	17	11	35	0	25	34
ENSDARG00000004150	grm2a	39	16	36	25	59	54	12	9	22	28	27	16
ENSDARG00000004158	tmem63c	14	13	15	11	10	7	11	22	16	18	11	17
ENSDARG00000004160	reep3b	15	8	8	3	4	16	1	2	4	0	6	5
ENSDARG00000004167	zgc:110366	125	84	57	48	70	114	34	30	98	52	83	71
ENSDARG00000004169	stmn1a	377	249	198	103	156	202	100	151	218	101	272	333
ENSDARG00000004171	rabac1	15	4	8	6	19	35	2	19	8	9	15	21
ENSDARG00000004173	copa	327	169	84	55	139	230	108	210	134	31	245	224
ENSDARG00000004174	cnot1	235	154	140	107	217	316	171	147	239	45	271	246
ENSDARG00000004176	ulk4	176	104	90	48	62	126	37	38	136	114	139	157
ENSDARG00000004184	nf1b	144	123	263	199	300	400	228	285	433	269	393	354
ENSDARG00000004187	zgc:122979	154	84	62	54	131	181	149	207	174	55	162	167
ENSDARG00000004189	cbx1a	296	178	95	60	121	134	68	74	186	46	182	146
ENSDARG00000004196	tnfsf10l	36	23	26	15	25	42	24	15	70	36	40	26
ENSDARG00000004199	spam1	16	18	29	10	18	30	3	1	4	0	13	9
ENSDARG00000004204	efhc2	14	5	7	1	9	8	0	2	11	0	16	6
ENSDARG00000004211	ccdc106a	61	36	47	17	60	64	45	36	43	21	98	92
ENSDARG00000004218	rnd1b	153	77	64	42	85	114	51	50	117	89	99	64
ENSDARG00000004219	slc6a3	4	7	13	7	5	6	0	1	4	0	4	8
ENSDARG00000004227	pde3a	183	101	139	57	152	162	61	71	181	58	120	116
ENSDARG00000004232	dlb	15	12	7	4	8	31	0	7	7	7	16	20
ENSDARG00000004243	asic4b	31	25	68	39	46	74	18	2	73	57	30	26
ENSDARG00000004246	slit2	73	28	38	33	55	71	14	40	45	20	38	52
ENSDARG00000004251	dhfr	254	133	70	77	112	177	128	151	157	55	205	240
ENSDARG00000004256	wnt11	479	195	147	86	205	302	102	134	128	79	246	214
ENSDARG00000004260	cul5b	58	30	38	15	26	29	11	26	34	12	51	47
ENSDARG00000004261	tmed9	173	82	49	48	79	160	92	82	135	56	170	176
ENSDARG00000004262	cyp46a1.2	92	58	51	31	54	47	57	45	69	45	123	104
ENSDARG00000004270	atl3	219	89	126	96	183	260	236	172	210	110	283	311
ENSDARG00000004280	seh1l	13	8	35	14	20	37	17	19	22	17	8	14
ENSDARG00000004282	zgc:77375	141	95	103	52	110	155	121	118	109	63	240	233
ENSDARG00000004291	hecw1b	9	9	13	1	14	14	12	9	13	0	7	9
ENSDARG00000004296	ambp	228	127	84	65	78	126	25	75	75	66	65	105
ENSDARG00000004297	irf2bpl	417	239	227	107	262	421	271	322	359	184	422	418
ENSDARG00000004301	rhogb	91	64	70	54	112	156	105	165	98	53	243	197
ENSDARG00000004302	slc45a1	31	39	22	13	32	29	31	26	24	5	28	9
ENSDARG00000004305	vangl1	34	11	24	22	29	49	13	42	23	21	37	35
ENSDARG00000004306	klhl18	59	27	34	41	66	86	10	33	59	33	91	104
ENSDARG00000004307	lypd6	16	13	23	7	25	11	3	6	19	24	7	27
ENSDARG00000004308	fam8a1b	57	34	36	16	25	32	17	24	27	57	15	20
ENSDARG00000004311	ldlrap1a	59	65	78	34	39	100	27	53	80	8	55	92
ENSDARG00000004318	cbwd	11	11	5	7	11	13	14	2	29	6	18	19
ENSDARG00000004322	ush1ga	62	35	40	26	48	28	12	18	40	31	63	35
ENSDARG00000004325	casp9	64	40	31	23	39	41	10	47	17	31	34	46
ENSDARG00000004328	si:ch1073-284b18.2	243	154	98	58	52	66	28	43	37	40	53	92
ENSDARG00000004336	exoc4	178	79	43	41	110	197	75	81	106	41	179	161
ENSDARG00000004343	nelfe	48	19	45	19	44	77	10	27	29	58	29	27
ENSDARG00000004358	gnb3a	17	8	7	5	19	37	17	7	13	0	10	13
ENSDARG00000004363	lhfpl6	260	136	110	88	97	159	22	87	78	31	87	119
ENSDARG00000004372	fmnl3	156	62	78	58	101	117	46	50	81	81	65	69
ENSDARG00000004377	ppp1r13ba	234	142	156	66	143	206	68	129	114	83	147	132
ENSDARG00000004378	yrk	143	77	52	32	60	60	39	34	25	33	98	111
ENSDARG00000004386	si:dkey-153k10.9	43	34	30	26	44	70	56	39	109	27	72	49
ENSDARG00000004392	hdr	662	379	60	58	64	112	88	145	151	58	160	89
ENSDARG00000004396	b3gnt5b	41	22	20	10	29	14	5	11	9	8	51	38
ENSDARG00000004402	elovl6	342	210	170	133	186	269	202	253	245	151	350	300
ENSDARG00000004405	snx10a	20	21	28	24	46	47	20	23	2	56	53	39
ENSDARG00000004406	spra	61	36	27	20	38	53	26	22	21	28	60	53
ENSDARG00000004415	tcf7l2	290	176	152	77	149	224	95	75	140	89	232	199
ENSDARG00000004427	dpy30	122	81	50	30	40	60	47	75	52	41	87	61
ENSDARG00000004433	btk	123	63	50	34	70	78	51	63	55	46	140	158
ENSDARG00000004436	fam92a1	67	42	59	65	109	106	61	89	109	81	129	137
ENSDARG00000004445	grm5a	16	9	11	6	15	6	9	1	9	15	5	9
ENSDARG00000004447	aplnr2	30	21	35	28	88	68	54	77	63	71	115	95
ENSDARG00000004451	tnfrsfa	145	76	87	80	129	211	102	196	164	70	297	335
ENSDARG00000004452	tardbpl	63	50	38	14	32	48	34	2	33	37	54	21
ENSDARG00000004455	p2rx5	52	42	83	26	78	95	49	50	126	93	64	88
ENSDARG00000004459	unc119.2	156	69	14	7	11	32	9	22	18	5	37	15
ENSDARG00000004460	desi2	96	47	125	64	70	105	50	56	67	31	97	108
ENSDARG00000004470	prkcsh	207	133	117	74	155	219	99	187	128	75	259	236
ENSDARG00000004472	atat1	101	44	54	36	43	69	45	37	42	31	66	83
ENSDARG00000004492	pcyt1ab	197	130	139	78	103	140	103	90	104	53	158	184
ENSDARG00000004497	tspan33a	24	16	8	2	9	17	9	8	7	20	24	30
ENSDARG00000004502	rcor3	41	25	26	19	39	40	22	29	25	19	44	24
ENSDARG00000004517	ppat	6	5	34	23	34	50	72	87	129	42	92	70
ENSDARG00000004525	zgc:63882	155	101	108	51	79	108	67	91	154	51	150	132
ENSDARG00000004527	pin4	15	15	18	5	15	24	0	6	0	0	8	25
ENSDARG00000004529	zgc:173742	121	75	78	39	99	147	42	40	54	70	76	74
ENSDARG00000004537	kmt2a	352	193	175	106	275	335	208	215	380	150	377	373
ENSDARG00000004539	ptgs2a	4	3	10	6	20	26	0	11	3	22	12	11
ENSDARG00000004561	prkcg	19	4	13	7	17	11	4	10	0	0	6	2
ENSDARG00000004574	gtf3c2	233	133	116	73	117	201	110	116	166	58	197	172
ENSDARG00000004576	plk4	72	15	28	18	37	46	17	10	75	26	19	32
ENSDARG00000004577	zgc:194665	50	28	22	23	37	40	9	9	36	52	28	17
ENSDARG00000004580	nmnat2	53	38	37	34	47	62	8	18	27	37	42	48
ENSDARG00000004587	kat5a	33	21	16	13	28	50	17	15	30	12	24	20
ENSDARG00000004588	sox4a	157	92	154	108	200	359	236	249	367	114	332	340
ENSDARG00000004592	gpr22a	17	7	15	9	11	21	2	8	0	12	6	0
ENSDARG00000004594	znf800a	101	83	68	34	94	76	36	22	39	40	75	42
ENSDARG00000004597	lrrc4ba	68	34	48	53	45	55	28	10	19	60	22	25
ENSDARG00000004616	mtmr2	85	41	34	18	47	42	19	12	42	20	52	49
ENSDARG00000004618	stx2a	120	95	98	69	86	164	114	166	145	81	268	337
ENSDARG00000004621	gpm6ab	102	54	189	134	277	325	197	245	418	210	291	280
ENSDARG00000004627	panx3	57	69	75	31	57	69	17	9	31	56	36	32
ENSDARG00000004632	egln1b	88	30	37	23	41	38	4	18	5	29	54	31
ENSDARG00000004633	epn3b	27	20	25	18	40	43	10	8	15	27	9	15
ENSDARG00000004634	osbp	129	64	55	61	70	83	56	69	82	31	141	113
ENSDARG00000004635	epha7	264	170	94	48	88	138	142	147	167	68	203	198
ENSDARG00000004636	ccdc9	40	36	58	18	77	67	25	48	27	38	47	40
ENSDARG00000004643	cdhr1a	14	19	20	16	31	37	11	7	23	8	30	20
ENSDARG00000004647	spice1	36	18	22	14	18	15	13	10	38	7	44	25
ENSDARG00000004648	kctd16a	34	26	52	6	48	52	25	34	51	16	32	30
ENSDARG00000004672	ptk2ab	336	227	190	120	201	274	139	148	171	148	254	161
ENSDARG00000004680	dnajb6a	201	126	94	59	90	91	90	98	110	68	132	112
ENSDARG00000004687	acaa1	44	27	45	26	32	63	6	4	24	10	47	50
ENSDARG00000004692	nabp1a	282	188	225	165	287	415	191	259	333	210	482	473
ENSDARG00000004695	six4a	158	113	74	58	90	102	44	71	51	51	71	86
ENSDARG00000004696	eefsec	61	40	51	30	106	94	13	46	47	20	77	66
ENSDARG00000004697	rxrgb	410	222	126	57	105	201	53	62	100	50	70	90
ENSDARG00000004702	irf2bp2a	759	505	285	210	449	737	467	566	432	243	937	972
ENSDARG00000004706	syf2	50	31	34	9	33	28	24	33	9	4	60	92
ENSDARG00000004712	tbr1b	72	38	51	38	55	56	16	25	39	53	22	39
ENSDARG00000004714	tcf12	660	348	436	336	617	727	517	623	764	430	897	812
ENSDARG00000004721	mpp5b	76	36	19	14	22	25	11	2	9	0	11	9
ENSDARG00000004724	tcea3	56	36	40	13	31	54	51	35	23	23	58	85
ENSDARG00000004726	trappc11	160	88	90	48	88	142	112	117	117	14	178	144
ENSDARG00000004727	cmss1	35	27	17	15	50	32	17	28	50	82	57	51
ENSDARG00000004735	hnrnpub	267	136	139	61	96	180	74	95	99	125	196	157
ENSDARG00000004745	lmbr1l	39	18	28	24	50	45	14	9	25	18	52	42
ENSDARG00000004748	zgc:100868	34	13	18	6	14	23	3	2	0	21	14	20
ENSDARG00000004753	mylkb	34	19	29	16	19	17	10	39	22	46	2	2
ENSDARG00000004754	hspa4a	175	109	49	63	70	127	102	152	96	63	186	209
ENSDARG00000004757	ybx1	523	292	283	220	417	524	477	600	405	130	832	716
ENSDARG00000004771	ankrd10b	458	256	216	138	292	356	276	418	263	188	501	458
ENSDARG00000004774	wdr36	51	28	40	22	39	46	38	19	40	30	88	45
ENSDARG00000004782	fgfr3	13	9	14	5	9	14	6	0	0	13	13	14
ENSDARG00000004785	cops2	12	10	13	11	18	17	9	11	28	8	30	17
ENSDARG00000004794	ccdc146	32	22	39	26	39	27	7	7	8	33	22	7
ENSDARG00000004796	mgrn1b	181	89	76	60	122	150	89	61	108	35	133	194
ENSDARG00000004823	asz1	33	17	23	15	37	28	4	13	20	16	16	4
ENSDARG00000004830	flot2a	322	184	212	144	278	380	206	266	423	143	328	372
ENSDARG00000004836	dnajc5ab	169	131	118	87	145	173	109	98	165	56	268	216
ENSDARG00000004840	rassf1	909	371	225	152	268	422	244	225	254	92	403	403
ENSDARG00000004843	foxp1a	301	152	111	98	160	154	100	123	164	112	229	183
ENSDARG00000004851	hinfp	112	67	63	59	113	115	61	134	90	19	137	163
ENSDARG00000004861	esrrga	40	17	19	15	13	32	11	19	0	8	34	12
ENSDARG00000004866	rfx5	18	21	22	14	25	16	6	23	27	11	21	18
ENSDARG00000004866	mindy1	18	21	22	14	25	16	6	23	27	11	21	18
ENSDARG00000004869	penka	81	56	77	37	68	63	45	34	59	28	101	80
ENSDARG00000004870	psen1	86	44	77	34	73	84	25	65	69	82	107	108
ENSDARG00000004871	mst1rb	41	34	52	34	66	68	33	24	9	53	30	19
ENSDARG00000004874	spata6l	27	15	16	10	20	20	10	6	0	13	10	10
ENSDARG00000004875	tmc6b	189	115	97	53	142	148	87	108	94	98	156	127
ENSDARG00000004877	rock2b	50	24	54	21	59	89	17	10	41	39	24	16
ENSDARG00000004880	acsm3	28	18	26	12	29	34	19	14	46	5	15	13
ENSDARG00000004889	aga	58	41	41	32	50	76	42	22	59	43	67	53
ENSDARG00000004891	pex19	15	11	12	10	20	22	0	7	6	0	15	14
ENSDARG00000004898	zp2l2	39	22	28	19	31	29	5	3	20	38	27	11
ENSDARG00000004904	gys2	12	9	1	1	10	2	0	1	5	0	9	14
ENSDARG00000004906	stip1	211	155	154	77	164	240	141	121	266	105	349	330
ENSDARG00000004925	immp2l	32	30	18	15	34	32	4	14	29	3	15	11
ENSDARG00000004930	lmo7a	167	127	248	141	298	358	86	146	294	134	275	291
ENSDARG00000004931	slc8a3	123	75	105	52	147	222	83	95	160	186	159	125
ENSDARG00000004932	anos1b	17	8	8	1	10	20	7	4	11	0	0	0
ENSDARG00000004937	skp2	298	212	122	85	199	315	180	231	161	71	381	368
ENSDARG00000004939	mtdhb	165	91	62	46	76	104	55	52	86	109	98	111
ENSDARG00000004948	bccip	227	126	106	119	172	221	129	205	248	91	357	381
ENSDARG00000004952	rsad2	21	12	3	4	11	7	1	3	8	0	2	7
ENSDARG00000004953	mxb	54	39	56	38	74	73	20	46	47	34	44	60
ENSDARG00000004954	grna	18	9	14	12	16	46	12	1	14	0	46	59
ENSDARG00000004964	cyp4t8	9	5	9	0	6	5	4	21	6	0	1	9
ENSDARG00000004979	elovl5	8	11	13	3	3	19	9	5	13	0	13	8
ENSDARG00000004988	ppp3ca	15	11	19	9	27	34	14	39	38	22	39	23
ENSDARG00000005002	brf1b	98	52	53	48	109	222	47	105	137	44	128	100
ENSDARG00000005004	slc5a12	16	11	13	13	29	20	9	15	11	19	9	0
ENSDARG00000005010	si:dkeyp-2e4.8	9	7	15	15	34	17	9	5	5	0	9	8
ENSDARG00000005015	tspy	331	164	138	87	215	268	157	161	168	62	373	274
ENSDARG00000005023	fkbp9	70	42	43	23	44	27	18	11	38	7	36	14
ENSDARG00000005026	tshz1	53	45	40	39	47	84	28	36	55	59	62	46
ENSDARG00000005034	ispd	78	58	58	54	93	124	38	33	76	20	57	117
ENSDARG00000005049	rab20	9	11	16	9	21	32	2	4	3	12	20	41
ENSDARG00000005050	wnt2ba	66	31	55	39	33	59	14	25	44	18	44	86
ENSDARG00000005058	ncapd2	106	71	40	30	56	50	18	26	33	31	35	73
ENSDARG00000005078	eif4e3	101	56	70	45	110	129	34	24	37	68	95	72
ENSDARG00000005085	ggctb	76	52	69	47	46	91	40	24	42	55	61	33
ENSDARG00000005092	cep89	35	24	27	21	22	92	17	9	11	0	61	38
ENSDARG00000005095	glcea	71	42	46	29	96	118	17	57	91	43	56	77
ENSDARG00000005098	zgc:86764	122	54	49	41	83	64	30	50	57	28	101	112
ENSDARG00000005104	limk2	127	69	62	25	47	94	6	21	71	56	35	29
ENSDARG00000005112	cdh17	9	2	9	0	4	10	2	1	6	0	0	5
ENSDARG00000005115	calub	972	532	425	263	582	823	428	723	736	287	910	934
ENSDARG00000005122	atp2a2b	423	243	187	157	322	488	205	338	379	159	592	548
ENSDARG00000005126	large1	236	175	238	130	212	333	134	206	305	84	271	265
ENSDARG00000005128	rnaseh2b	125	69	49	69	63	71	47	65	91	70	78	46
ENSDARG00000005134	psmd11b	276	162	103	62	147	205	122	125	170	117	320	263
ENSDARG00000005141	camkvb	83	56	88	38	61	67	50	11	40	18	54	46
ENSDARG00000005150	tbx20	111	75	89	45	73	111	43	64	56	73	183	168
ENSDARG00000005154	aspa	141	87	162	91	178	207	55	115	135	97	242	266
ENSDARG00000005162	tpm3	29	15	36	19	39	19	5	31	23	16	20	16
ENSDARG00000005172	dynll2b	578	312	276	219	324	460	243	408	416	142	551	589
ENSDARG00000005176	zgc:101040	44	24	34	26	39	64	5	2	23	50	29	29
ENSDARG00000005179	dglucy	67	45	40	44	81	74	27	28	51	81	94	88
ENSDARG00000005185	cpn1	223	153	109	72	108	134	77	79	96	101	144	150
ENSDARG00000005186	sp4	1450	745	420	305	633	850	566	590	739	429	760	1022
ENSDARG00000005191	ahcy	624	311	182	146	280	434	268	276	292	124	481	454
ENSDARG00000005210	coro2a	443	215	186	148	280	368	132	247	313	210	299	345
ENSDARG00000005216	zgc:158328	176	87	67	59	86	90	60	49	38	111	77	82
ENSDARG00000005218	wrnip1	82	53	45	38	44	65	20	44	30	36	64	41
ENSDARG00000005220	pdcd6	363	236	373	260	418	498	294	445	490	207	767	811
ENSDARG00000005221	desmb	26	27	46	26	39	50	15	15	0	79	24	8
ENSDARG00000005230	ssr2	157	58	91	53	68	123	57	74	116	30	142	117
ENSDARG00000005232	ccdc85ca	43	19	45	25	61	44	60	9	46	11	14	19
ENSDARG00000005236	srcap	399	190	174	107	226	280	191	244	229	56	370	330
ENSDARG00000005246	asb3	61	31	43	24	47	39	7	19	16	27	49	59
ENSDARG00000005251	rpe	127	74	104	71	106	152	99	122	166	83	119	171
ENSDARG00000005254	kdelr2a	256	143	129	46	96	140	96	112	199	35	180	151
ENSDARG00000005271	zc3h12a	45	26	64	32	48	57	43	21	19	40	10	45
ENSDARG00000005274	rad52	27	21	26	25	20	35	6	8	65	0	16	12
ENSDARG00000005284	fbxl15	13	22	37	11	17	41	14	14	23	26	13	22
ENSDARG00000005314	si:dkeyp-80c12.5	9	11	3	0	17	18	0	0	0	0	2	0
ENSDARG00000005315	celf1	330	191	127	79	194	216	94	151	196	91	260	238
ENSDARG00000005318	stam2	19	15	14	17	29	32	10	23	10	17	18	27
ENSDARG00000005320	nipsnap1	64	27	42	12	12	40	0	5	18	30	37	29
ENSDARG00000005327	ftr66	9	4	2	4	6	23	2	0	0	0	2	1
ENSDARG00000005332	lipib	103	44	35	18	31	39	22	1	44	22	37	7
ENSDARG00000005335	slc22a4	5	5	8	4	13	12	1	1	0	0	0	0
ENSDARG00000005343	ccdc85al	22	13	21	11	10	38	7	14	35	37	34	18
ENSDARG00000005350	dip2ba	75	58	51	44	83	138	44	57	84	45	103	57
ENSDARG00000005355	larp6a	222	109	188	103	169	276	167	204	218	138	418	360
ENSDARG00000005359	sucla2	137	93	76	39	99	124	74	77	104	46	132	130
ENSDARG00000005364	grin3ba	45	19	48	13	37	64	22	11	34	26	23	16
ENSDARG00000005368	mcamb	262	117	54	44	116	89	13	47	88	35	94	102
ENSDARG00000005371	gprc6a	13	15	9	8	10	25	16	7	6	44	9	15
ENSDARG00000005372	camk4	11	10	16	7	15	13	15	2	0	0	0	10
ENSDARG00000005374	tubgcp4	27	9	21	13	22	39	17	11	11	27	27	11
ENSDARG00000005382	prdm9	51	23	47	23	30	36	8	23	42	15	61	31
ENSDARG00000005394	dnmt3aa	4	1	14	5	2	12	1	2	4	0	2	0
ENSDARG00000005397	trim3b	868	500	604	322	612	814	458	558	618	293	882	1052
ENSDARG00000005414	grapa	130	81	45	43	75	85	115	120	39	73	167	160
ENSDARG00000005416	map3k5	360	199	233	125	207	266	161	218	261	146	362	341
ENSDARG00000005423	pgam1a	461	237	206	150	272	409	148	202	421	169	501	474
ENSDARG00000005425	wdfy1	153	77	77	81	110	138	37	93	101	75	144	196
ENSDARG00000005448	mtfmt	93	59	41	41	78	73	25	29	67	48	51	73
ENSDARG00000005451	gdi2	637	402	344	230	506	652	437	613	526	226	857	912
ENSDARG00000005453	foxp2	165	81	176	79	131	146	119	151	155	68	179	132
ENSDARG00000005454	tacc3	564	331	140	127	212	372	200	209	307	49	294	309
ENSDARG00000005456	katnb1	225	127	78	51	71	105	36	43	53	34	71	101
ENSDARG00000005458	csnk1g2a	170	88	135	55	119	157	86	96	155	70	136	119
ENSDARG00000005462	kif4	121	64	72	32	49	116	78	39	56	49	65	84
ENSDARG00000005463	slc30a1a	340	233	266	176	350	387	264	391	380	134	570	606
ENSDARG00000005464	dnase1l1	118	50	82	71	150	142	110	124	130	51	241	252
ENSDARG00000005468	irf2bp1	265	196	189	136	219	320	101	188	220	186	254	174
ENSDARG00000005476	nav3	118	70	120	54	125	193	44	47	164	104	95	51
ENSDARG00000005479	tenm3	115	84	105	63	70	86	1	42	98	85	73	60
ENSDARG00000005481	nfkbiaa	193	101	145	71	212	260	154	275	180	102	370	338
ENSDARG00000005482	rapgef2	102	54	195	129	219	285	236	203	311	103	308	243
ENSDARG00000005485	ucmab	18	14	28	16	24	36	17	29	18	33	6	20
ENSDARG00000005500	dgcr6	19	10	20	10	29	33	20	2	23	32	12	22
ENSDARG00000005510	gdf6b	70	42	40	24	25	54	37	20	2	7	27	54
ENSDARG00000005513	naca	271	174	104	68	137	135	90	56	127	116	173	120
ENSDARG00000005518	slc5a9	19	8	6	5	21	14	0	0	7	18	7	8
ENSDARG00000005522	galr1a	11	16	37	21	49	32	6	12	35	12	12	24
ENSDARG00000005525	acy3.2	74	26	81	57	98	133	72	58	133	54	139	86
ENSDARG00000005526	igfn1.1	1	0	11	4	11	11	4	0	12	6	7	1
ENSDARG00000005536	ubr7	41	55	57	23	38	61	31	11	31	33	51	32
ENSDARG00000005540	xpo7	196	158	121	79	120	147	139	218	127	113	245	290
ENSDARG00000005541	wif1	125	77	49	34	49	51	43	29	26	31	70	74
ENSDARG00000005544	btbd3a	33	25	25	26	45	60	20	37	40	23	42	44
ENSDARG00000005547	rint1	54	41	28	10	24	31	3	36	10	3	47	43
ENSDARG00000005549	znf710b	176	103	105	88	167	179	45	98	142	136	188	122
ENSDARG00000005551	hnrnph1l	41	17	31	9	45	31	26	68	32	5	52	48
ENSDARG00000005559	pou4f1	44	14	40	11	26	66	26	15	30	69	46	8
ENSDARG00000005560	ywhah	213	132	126	88	169	216	107	137	78	87	227	204
ENSDARG00000005561	gfm2	153	100	93	62	91	154	101	101	210	106	166	135
ENSDARG00000005574	vsx2	51	30	61	36	16	35	18	24	45	13	58	16
ENSDARG00000005576	mphosph8	672	368	365	205	371	580	257	559	394	216	707	697
ENSDARG00000005586	zbtb20	162	101	124	89	187	260	222	309	242	121	437	442
ENSDARG00000005590	mtf2	144	97	75	41	66	102	53	62	38	27	102	72
ENSDARG00000005593	rxrga	255	117	118	57	90	129	50	39	69	87	90	88
ENSDARG00000005595	adgb	49	17	32	30	33	68	38	30	19	49	80	65
ENSDARG00000005606	paxip1	110	62	39	35	41	63	33	57	86	86	94	102
ENSDARG00000005612	aph1b	80	51	64	48	71	102	63	28	102	24	64	66
ENSDARG00000005619	nek2	576	274	189	163	267	321	116	242	258	133	365	388
ENSDARG00000005626	si:ch211-133l11.10	90	52	46	19	24	51	22	29	48	22	50	37
ENSDARG00000005627	zmp:0000000527	47	33	35	15	40	39	16	32	14	42	73	96
ENSDARG00000005640	adat3	91	52	32	29	40	55	29	21	62	86	36	34
ENSDARG00000005643	gcat	291	108	99	57	72	143	79	69	102	67	117	130
ENSDARG00000005645	robo3	348	165	156	111	171	212	72	70	125	130	152	123
ENSDARG00000005648	olfml2a	23	14	16	8	17	23	14	3	0	12	27	28
ENSDARG00000005651	hrasb	77	52	35	33	45	27	73	70	44	38	68	67
ENSDARG00000005652	man1a1	575	300	266	198	286	425	239	374	276	154	562	582
ENSDARG00000005670	ttbk2a	17	8	8	10	6	13	0	9	0	21	14	6
ENSDARG00000005673	f3b	293	180	154	102	197	249	162	273	272	95	345	375
ENSDARG00000005675	sec61a1l	418	201	174	135	248	341	222	233	250	136	335	396
ENSDARG00000005679	trip10a	28	11	34	19	31	42	6	17	15	31	7	38
ENSDARG00000005699	ddx19	93	52	37	41	81	59	32	34	66	29	84	72
ENSDARG00000005704	eps8l3b	12	4	19	14	9	33	1	9	2	11	31	44
ENSDARG00000005713	ethe1	121	65	85	55	87	131	92	105	119	42	107	114
ENSDARG00000005716	olfml2ba	22	2	3	5	11	9	6	8	3	37	6	1
ENSDARG00000005739	gpm6ba	7	6	2	3	14	7	0	2	15	25	12	6
ENSDARG00000005754	ptprfb	390	242	169	93	157	236	67	99	141	108	285	345
ENSDARG00000005762	col14a1a	271	196	192	109	104	155	66	111	110	82	127	155
ENSDARG00000005772	tsr2	80	45	27	7	12	20	5	11	21	4	22	28
ENSDARG00000005774	ddx3xb	244	118	150	110	195	224	136	140	243	164	326	264
ENSDARG00000005775	scn8aa	10	3	7	1	4	11	1	1	0	14	4	3
ENSDARG00000005776	guk1b	26	14	40	20	30	41	9	22	30	19	9	10
ENSDARG00000005780	npy8br	33	19	38	19	35	32	8	2	4	27	28	23
ENSDARG00000005783	ncanb	28	28	24	18	41	53	5	4	14	12	9	22
ENSDARG00000005786	ppm1f	667	390	285	239	432	531	465	482	392	229	678	790
ENSDARG00000005789	enpp1	205	121	128	112	144	181	60	68	111	56	144	182
ENSDARG00000005791	rpl28	44	30	21	18	25	26	12	17	7	51	48	32
ENSDARG00000005799	smim14	79	28	72	61	134	202	242	266	274	72	368	352
ENSDARG00000005800	ampd3a	83	48	72	55	167	177	73	39	127	45	105	102
ENSDARG00000005814	klhl10a	15	7	21	12	8	44	8	2	2	15	26	1
ENSDARG00000005821	ncf2	25	14	21	13	24	37	11	12	14	18	42	71
ENSDARG00000005823	slc39a10	267	161	186	124	302	354	261	407	475	197	580	571
ENSDARG00000005827	eif2s1a	76	67	35	40	72	95	26	54	45	65	84	67
ENSDARG00000005828	faima	6	5	4	2	14	7	1	15	0	1	2	12
ENSDARG00000005834	gatad2b	546	279	317	198	477	666	405	414	603	256	777	731
ENSDARG00000005840	got2b	9	12	17	12	9	26	9	15	0	12	16	12
ENSDARG00000005842	cd9a	45	49	74	49	123	108	38	57	40	104	106	102
ENSDARG00000005846		38	16	9	7	16	31	20	16	10	27	20	17
ENSDARG00000005853	slc25a6	27	6	18	12	13	18	16	2	40	6	18	8
ENSDARG00000005861	ralgapa2	215	119	128	65	119	189	72	93	140	87	213	222
ENSDARG00000005867	gon4l	104	59	87	34	65	127	25	32	102	64	44	55
ENSDARG00000005870	mmadhc	30	20	20	17	19	45	15	13	9	27	49	59
ENSDARG00000005883	rfx1a	861	441	271	229	369	526	344	375	346	127	496	412
ENSDARG00000005891	cyb5r3	190	96	115	74	129	145	133	193	148	32	273	203
ENSDARG00000005894	slc7a9	76	70	39	40	51	74	15	18	90	29	26	9
ENSDARG00000005897	dera	2	8	40	34	25	24	22	17	30	24	23	16
ENSDARG00000005908	clk4b	129	66	84	58	67	136	35	85	74	30	132	92
ENSDARG00000005915	tcf3a	1011	603	445	303	584	736	438	605	656	335	824	1014
ENSDARG00000005916	srpk3	241	95	53	32	49	58	33	53	79	20	78	62
ENSDARG00000005924	serpina10a	57	45	70	40	72	95	48	82	76	88	78	129
ENSDARG00000005927	tbc1d17	232	112	133	115	135	253	184	156	238	92	313	317
ENSDARG00000005941	clul1	233	138	276	160	279	360	246	293	302	165	464	514
ENSDARG00000005941	yes1	233	138	276	160	279	360	246	293	302	165	464	514
ENSDARG00000005942	v2rl1	65	49	20	21	35	24	14	8	84	18	40	38
ENSDARG00000005945	sart1	127	52	52	56	84	143	73	60	101	87	111	90
ENSDARG00000005948	ankmy2a	21	15	21	6	20	13	5	26	7	11	17	8
ENSDARG00000005972	ric8b	101	54	52	49	59	94	31	24	47	58	38	18
ENSDARG00000005980	sfswap	65	38	28	27	55	47	9	13	29	32	42	41
ENSDARG00000005989	rgl1	420	216	206	136	233	380	212	228	463	114	390	340
ENSDARG00000005993	prc1b	141	94	61	47	58	119	56	68	80	30	148	144
ENSDARG00000006003	mycla	480	247	183	102	211	324	201	217	302	135	357	285
ENSDARG00000006008	dct	4	10	10	9	11	27	6	0	7	7	2	8
ENSDARG00000006010	bmi1a	144	95	85	61	84	110	91	111	80	26	182	143
ENSDARG00000006011	klhl42	42	43	43	41	77	92	20	38	69	45	71	20
ENSDARG00000006019	tktb	420	237	130	107	196	267	150	223	194	92	312	313
ENSDARG00000006025	tp53i11b	48	37	62	43	54	95	13	26	41	15	40	46
ENSDARG00000006029	lta4h	323	167	113	64	126	243	132	206	215	86	290	286
ENSDARG00000006031	abat	173	89	110	59	105	156	35	86	93	94	137	129
ENSDARG00000006038	aebp2	282	156	125	83	156	209	142	94	202	87	256	161
ENSDARG00000006040	cyp20a1	60	31	60	47	77	83	40	42	68	8	91	99
ENSDARG00000006044	ust	116	74	112	85	121	161	44	39	104	39	99	108
ENSDARG00000006052	malt2	30	12	20	8	30	23	17	35	26	18	62	38
ENSDARG00000006060	crybg1b	36	38	22	6	18	23	10	17	37	3	60	47
ENSDARG00000006062	akap1b	113	37	78	45	76	115	18	21	57	19	158	87
ENSDARG00000006065	znf385b	380	178	327	182	394	523	347	526	524	208	611	686
ENSDARG00000006074	uck2a	258	159	73	63	124	142	81	88	116	98	151	129
ENSDARG00000006079	gpr37l1a	39	25	29	8	52	61	53	39	56	39	54	41
ENSDARG00000006092	rad21a	15	2	18	3	7	2	6	12	11	6	6	7
ENSDARG00000006093	cdk15	71	47	66	48	71	90	20	97	33	2	62	68
ENSDARG00000006094	igf2r	328	198	149	89	202	246	202	306	188	85	317	408
ENSDARG00000006109	pimr185	42	22	26	12	18	40	1	11	16	8	11	6
ENSDARG00000006110	chrd	44	25	50	38	37	74	21	13	9	20	30	58
ENSDARG00000006112	myof	21	17	36	20	65	41	11	17	61	29	33	62
ENSDARG00000006120	tbx2b	33	23	31	15	19	50	5	5	20	27	19	9
ENSDARG00000006124	kdm5c	173	85	90	60	101	132	71	146	170	76	187	149
ENSDARG00000006125	csnk1db	950	473	357	239	527	715	487	568	612	275	829	802
ENSDARG00000006128	cep170aa	231	138	183	156	292	357	281	235	267	207	468	467
ENSDARG00000006137	star	29	30	15	7	5	9	0	2	12	13	5	12
ENSDARG00000006151	pde11al	499	257	174	103	146	213	111	135	154	49	189	181
ENSDARG00000006169	lrrk2	55	26	67	53	37	88	17	49	38	15	58	73
ENSDARG00000006174	lrrc23	17	9	27	7	8	12	7	5	0	17	16	8
ENSDARG00000006181	hif1aa	93	47	64	41	70	106	35	74	91	50	85	78
ENSDARG00000006192	gatad2ab	184	101	79	49	93	131	57	125	96	80	126	157
ENSDARG00000006196	sav1	140	83	57	32	74	108	27	48	62	61	113	94
ENSDARG00000006200	eif4g1a	454	224	209	145	248	374	290	234	268	61	402	379
ENSDARG00000006202	erbb3a	43	45	105	31	83	119	27	50	61	102	39	56
ENSDARG00000006206	pou4f3	86	51	47	39	75	102	20	78	60	38	33	45
ENSDARG00000006207	gpx1b	160	100	64	41	53	76	30	65	33	20	108	71
ENSDARG00000006215	akr1b1	96	41	153	85	136	213	162	119	230	131	171	176
ENSDARG00000006219	gnl3	26	14	28	4	12	31	26	1	6	3	6	2
ENSDARG00000006220	ugt1a7	54	23	70	59	98	121	60	91	104	56	117	174
ENSDARG00000006220	ugt1a6	54	23	70	59	98	121	60	91	104	56	117	174
ENSDARG00000006220	ugt1a2	54	23	70	59	98	121	60	91	104	56	117	174
ENSDARG00000006220	ugt1a1	54	23	70	59	98	121	60	91	104	56	117	174
ENSDARG00000006220	ugt1ab	54	23	70	59	98	121	60	91	104	56	117	174
ENSDARG00000006225	ddx39aa	619	302	291	213	356	522	290	382	386	147	541	539
ENSDARG00000006235	brms1la	462	256	202	156	301	315	159	350	371	147	421	519
ENSDARG00000006240	slc27a1a	60	36	13	25	12	36	12	11	13	30	27	22
ENSDARG00000006242	ptp4a1	55	30	86	53	67	109	65	47	145	26	135	136
ENSDARG00000006251	ell2	7	1	8	9	10	9	6	13	2	16	23	21
ENSDARG00000006253	mier3a	536	264	293	171	346	441	312	420	371	147	521	589
ENSDARG00000006257	vldlr	16	11	31	25	50	86	40	67	39	50	27	47
ENSDARG00000006260	tuba8l4	589	358	184	142	285	328	181	250	268	85	441	501
ENSDARG00000006266	stat1a	455	246	206	146	344	381	312	388	290	128	460	444
ENSDARG00000006272	mpp5a	231	127	86	66	98	110	41	100	145	30	128	86
ENSDARG00000006279	rragd	154	79	86	67	98	144	16	45	106	48	111	98
ENSDARG00000006283	waslb	761	434	345	239	541	636	477	567	594	294	859	850
ENSDARG00000006288	prdm5	203	104	160	106	166	201	92	143	252	121	223	214
ENSDARG00000006290	ndufs5	125	78	51	39	96	81	94	137	113	47	112	129
ENSDARG00000006292	maats1	47	33	36	28	77	67	30	28	30	36	63	38
ENSDARG00000006299	arhgef7a	251	130	100	59	108	150	93	77	122	72	147	127
ENSDARG00000006300	psmd9	24	17	12	7	14	36	2	8	12	0	14	10
ENSDARG00000006301	raph1a	134	68	97	82	171	210	57	79	194	123	111	147
ENSDARG00000006307	shisa4	60	41	61	19	56	68	22	20	69	39	20	12
ENSDARG00000006308	ptpn18	76	51	77	45	92	73	52	104	50	48	136	116
ENSDARG00000006314	itgav	225	147	99	104	216	258	168	170	143	120	283	322
ENSDARG00000006332	snx14	101	67	61	52	75	82	26	55	46	15	98	92
ENSDARG00000006341	tas1r3	9	6	8	3	5	5	7	1	4	0	10	10
ENSDARG00000006345	med17	28	25	14	14	7	29	11	10	25	1	39	18
ENSDARG00000006350	nkx1.2la	152	81	64	53	86	140	20	30	117	95	68	26
ENSDARG00000006353	itga5	368	220	133	100	144	156	105	113	62	50	164	262
ENSDARG00000006356	slc18a3a	66	56	80	62	131	109	73	119	72	55	147	118
ENSDARG00000006368	crlf1b	46	48	78	39	101	95	46	32	58	24	59	42
ENSDARG00000006370	atp6v1h	60	37	56	16	53	84	44	44	65	20	75	66
ENSDARG00000006372	ugt5c2	81	51	48	21	58	43	24	26	82	21	73	57
ENSDARG00000006383	stxbp5l	186	105	121	60	186	208	183	146	208	103	216	228
ENSDARG00000006385	triobpb	1024	625	403	258	489	675	422	459	565	222	799	803
ENSDARG00000006389	smad2	599	336	503	348	695	833	548	794	941	366	1148	1211
ENSDARG00000006392	exosc9	174	80	66	34	86	122	59	93	99	50	179	197
ENSDARG00000006395	rbm25b	44	39	24	16	41	38	6	8	4	8	30	27
ENSDARG00000006396	nrcama	21	9	38	22	17	47	2	19	20	24	26	18
ENSDARG00000006397	laptm4a	312	157	166	95	132	221	172	169	251	135	234	203
ENSDARG00000006399	ywhae1	301	136	134	83	172	230	175	186	128	73	250	228
ENSDARG00000006408	hmgb3b	909	513	556	300	520	743	567	680	701	301	1109	1058
ENSDARG00000006409	mapk12b	30	16	43	14	36	37	6	14	23	0	0	6
ENSDARG00000006413	rpl38	18	6	14	7	8	25	7	3	0	9	21	10
ENSDARG00000006420	atrnl1b	255	168	131	62	152	154	92	92	216	57	185	233
ENSDARG00000006422	esyt3	88	59	41	38	101	125	36	83	66	54	62	72
ENSDARG00000006427	fabp2	61	32	197	99	180	177	119	75	117	65	270	214
ENSDARG00000006434	polr1e	63	49	37	14	31	60	18	16	11	1	53	30
ENSDARG00000006447	slc19a3a	19	9	16	2	12	25	3	1	11	0	19	16
ENSDARG00000006456	pdgfrl	46	22	57	33	44	82	43	36	72	28	62	68
ENSDARG00000006467	pcdh8	98	59	72	43	56	58	46	73	86	82	64	25
ENSDARG00000006468	grap2a	50	35	36	36	28	57	41	37	29	19	88	64
ENSDARG00000006474	saxo2	319	216	126	84	124	186	113	89	134	78	291	301
ENSDARG00000006487	anp32a	995	520	339	236	569	819	473	817	523	252	892	814
ENSDARG00000006491	agpat9l	63	35	48	53	42	85	78	94	34	36	129	174
ENSDARG00000006494	asb7	308	156	119	88	120	195	156	173	241	109	334	311
ENSDARG00000006497	rtn1a	245	171	163	111	243	349	254	258	216	133	348	289
ENSDARG00000006514	her6	1048	585	297	227	460	516	266	462	451	154	547	656
ENSDARG00000006522	otop2	6	7	24	8	17	21	8	0	12	41	18	3
ENSDARG00000006524	supt6h	40	23	38	31	31	48	26	17	19	0	50	24
ENSDARG00000006526	fn1b	141	103	99	81	99	97	32	25	80	114	81	46
ENSDARG00000006527	brd3a	150	99	74	34	74	101	97	55	114	83	171	104
ENSDARG00000006544	c1qtnf6b	29	28	23	14	45	53	24	38	28	12	82	79
ENSDARG00000006545	rgp1	142	100	53	51	125	128	94	153	116	91	237	251
ENSDARG00000006546	ak4	161	82	69	44	110	156	147	198	144	99	227	255
ENSDARG00000006553	rras	24	22	19	15	25	27	24	20	13	25	37	27
ENSDARG00000006560	irf4a	10	7	1	3	0	7	0	4	0	0	3	0
ENSDARG00000006566	nlk1	185	98	74	48	74	99	42	55	62	35	67	96
ENSDARG00000006567	dus4l	40	22	9	4	14	8	9	3	8	15	20	10
ENSDARG00000006568	kcnmb2	12	7	17	3	7	13	1	2	15	4	10	16
ENSDARG00000006580	cldnd	46	36	36	14	18	39	1	23	39	35	16	33
ENSDARG00000006584	phf8	94	55	33	26	46	60	53	23	41	49	40	67
ENSDARG00000006585	zmp:0000000529	6	2	17	12	18	9	10	0	5	4	9	3
ENSDARG00000006598	sgk2b	8	9	15	19	19	41	26	50	17	11	65	48
ENSDARG00000006600	lsm14aa	135	81	49	35	72	86	86	58	66	54	167	163
ENSDARG00000006601	kaznb	189	110	204	96	150	235	143	138	224	86	223	155
ENSDARG00000006602	chrna2a	259	153	113	67	101	112	93	113	120	34	213	234
ENSDARG00000006604	nectin3b	331	225	174	120	151	225	92	151	193	59	251	183
ENSDARG00000006607	gpr27	92	64	99	44	101	120	64	102	103	36	79	57
ENSDARG00000006615	hnf1ba	78	40	29	28	42	64	15	13	27	25	60	64
ENSDARG00000006617	napga	143	98	52	39	67	83	47	37	55	62	151	110
ENSDARG00000006621	pspc1	31	15	20	9	13	16	1	25	30	15	28	8
ENSDARG00000006624	ppp2r2ab	64	29	43	19	27	51	20	34	22	21	60	46
ENSDARG00000006636	slitrk2	5	8	14	2	13	3	9	0	14	0	4	7
ENSDARG00000006639	lnpk	104	50	97	32	94	100	73	80	74	81	96	56
ENSDARG00000006640	eomesa	63	53	58	38	52	83	18	7	2	49	22	31
ENSDARG00000006642	drg2	41	21	32	3	25	33	14	8	2	10	24	26
ENSDARG00000006666	si:dkeyp-69c1.6	64	36	45	32	58	59	20	39	53	13	84	103
ENSDARG00000006672	fam49a	456	278	169	96	170	278	137	161	316	170	266	329
ENSDARG00000006677	ripk1l	55	34	52	33	67	117	45	90	82	30	111	174
ENSDARG00000006678	pth2r	25	21	37	30	45	70	14	38	26	21	58	31
ENSDARG00000006683	arhgef6	175	78	41	35	87	128	114	128	124	82	141	166
ENSDARG00000006691	rpl12	7	11	4	2	8	22	0	4	0	0	10	0
ENSDARG00000006712	wipf2b	32	26	20	8	14	39	10	8	31	4	36	54
ENSDARG00000006719	specc1la	126	69	113	44	89	109	42	78	74	56	50	103
ENSDARG00000006747	tmem178b	102	54	61	27	67	83	23	36	63	74	90	35
ENSDARG00000006754	mllt3	450	221	91	54	64	108	100	71	84	85	112	108
ENSDARG00000006757	klhl41b	49	17	20	18	43	54	5	9	30	58	15	19
ENSDARG00000006758	fam234b	110	66	37	22	35	52	55	69	77	35	57	85
ENSDARG00000006760	slc24a3	14	10	15	22	39	46	10	27	19	2	40	26
ENSDARG00000006766	snd1	369	184	211	133	292	358	306	302	329	118	539	478
ENSDARG00000006773	elovl4a	103	53	57	44	49	98	52	34	64	39	52	55
ENSDARG00000006775	cass4	54	35	23	20	23	41	33	47	47	12	73	73
ENSDARG00000006782	rb1	258	153	72	35	70	111	34	113	137	29	185	178
ENSDARG00000006786	copz2	290	194	152	102	220	341	205	247	309	137	368	358
ENSDARG00000006791	arntl1a	355	180	175	152	278	401	252	319	368	116	490	561
ENSDARG00000006811	sult1st6	31	25	20	11	23	27	16	15	11	19	28	27
ENSDARG00000006812	wdr26b	211	117	96	60	100	173	119	119	109	67	168	112
ENSDARG00000006816	gtf2f2b	14	13	6	13	35	27	8	19	23	22	38	34
ENSDARG00000006818	urod	267	150	48	26	67	84	26	84	60	45	91	106
ENSDARG00000006832	galnt9	64	54	57	30	39	66	27	43	54	45	35	46
ENSDARG00000006837	mycn	414	231	151	90	237	248	235	210	262	72	190	210
ENSDARG00000006838	eef1a2	15	11	18	5	16	19	10	0	10	0	4	8
ENSDARG00000006840	gnmt	504	248	283	174	260	372	169	226	310	118	460	425
ENSDARG00000006848	parp9	7	13	16	15	9	28	6	2	9	5	11	7
ENSDARG00000006849	asic2	11	14	21	11	28	22	0	18	15	14	11	3
ENSDARG00000006859	nkain1	59	26	51	25	58	56	29	38	46	75	81	13
ENSDARG00000006862	kifap3b	92	47	73	30	78	99	37	42	94	24	47	60
ENSDARG00000006863	si:ch1073-349o24.2	17	28	37	17	35	41	25	26	10	13	19	12
ENSDARG00000006865	glra4a	59	27	44	27	68	106	15	27	50	85	35	21
ENSDARG00000006868	trh	8	7	18	14	8	32	0	1	19	3	2	14
ENSDARG00000006869	stx17	20	22	34	19	58	57	20	32	25	16	17	16
ENSDARG00000006877	enpp4	160	105	61	35	67	48	43	76	71	60	156	183
ENSDARG00000006878	phf21aa	165	108	77	47	137	153	101	83	90	88	105	70
ENSDARG00000006891	kcns3a	94	56	60	27	69	95	15	40	14	39	59	40
ENSDARG00000006892	myo3b	5	6	16	13	5	14	1	4	14	1	10	0
ENSDARG00000006894	oprk1	30	24	19	21	23	28	7	19	28	5	9	22
ENSDARG00000006896	lhx6	97	53	47	45	54	70	43	53	78	14	148	116
ENSDARG00000006899	far1	118	60	104	67	110	209	107	66	193	117	175	176
ENSDARG00000006900	impdh2	620	345	112	66	99	181	33	81	162	62	154	140
ENSDARG00000006911	wnt8b	56	50	23	8	42	35	7	5	37	32	8	29
ENSDARG00000006915	arl8ba	212	145	75	35	122	118	66	76	80	54	227	188
ENSDARG00000006921	lrp5	187	102	93	61	100	162	34	74	123	47	194	252
ENSDARG00000006923	cacna1ab	158	98	127	68	127	209	43	116	135	85	159	145
ENSDARG00000006924	fbxo38	148	59	97	35	44	84	47	79	89	39	116	75
ENSDARG00000006939	tbx16l	394	185	19	16	35	37	13	1	20	55	5	11
ENSDARG00000006944	gdpd3b	12	17	22	9	39	11	18	12	11	16	78	95
ENSDARG00000006963	cse1l	367	245	180	129	253	289	156	230	258	129	353	361
ENSDARG00000006978	zak	11	5	6	8	23	25	21	30	20	14	74	82
ENSDARG00000006983	celf3b	19	18	20	11	24	37	11	15	21	8	10	13
ENSDARG00000007009	hoxa11b	116	68	84	34	70	81	18	20	39	28	29	64
ENSDARG00000007024	uox	3	5	10	0	0	9	0	1	0	0	11	4
ENSDARG00000007025	ttc9c	324	197	108	52	160	173	99	216	103	90	284	175
ENSDARG00000007034	hnrpkl	490	299	464	328	467	683	561	652	761	300	928	936
ENSDARG00000007040	tmigd1	84	52	21	25	44	34	12	6	20	35	41	30
ENSDARG00000007045	cnot4a	80	59	80	59	53	99	26	75	107	124	85	105
ENSDARG00000007065	mrps18b	29	20	8	21	16	28	14	18	16	0	38	23
ENSDARG00000007077	ankrd50l	145	94	99	62	118	146	32	59	81	126	68	72
ENSDARG00000007081	pias4a	751	391	342	222	476	684	365	438	526	189	705	759
ENSDARG00000007086	aqp10a	75	45	40	31	31	45	17	12	24	31	44	68
ENSDARG00000007092	xab2	142	86	87	47	91	138	68	84	119	39	185	135
ENSDARG00000007097	her13	46	17	41	43	43	62	23	9	45	48	22	25
ENSDARG00000007098	itm2ba	16	13	15	8	17	30	17	6	7	17	7	33
ENSDARG00000007099	cx43.4	177	105	73	49	87	82	54	43	91	83	110	129
ENSDARG00000007108	lipia	56	50	27	7	30	59	15	27	46	25	35	48
ENSDARG00000007125	asb6	54	24	22	15	38	38	17	8	29	3	39	44
ENSDARG00000007127	acat2	483	279	267	137	317	310	145	282	256	118	427	389
ENSDARG00000007129	slc6a16a	233	125	96	44	86	137	77	82	60	24	89	82
ENSDARG00000007135	cnot3a	64	60	47	28	74	46	7	15	74	19	27	14
ENSDARG00000007136	gtf2h4	29	23	27	12	31	39	10	9	7	26	27	33
ENSDARG00000007141	psmc3	354	169	83	33	114	103	94	61	117	82	201	173
ENSDARG00000007149	l1cama	22	24	16	20	40	59	53	34	50	14	42	39
ENSDARG00000007151	kcnk2b	69	53	65	16	62	76	47	45	46	60	68	41
ENSDARG00000007169	itgb1bp1	237	175	100	57	105	127	52	66	116	64	113	137
ENSDARG00000007171	aig1	46	31	17	4	61	68	38	78	106	45	82	47
ENSDARG00000007172	plxna3	209	120	93	90	98	153	88	82	105	20	87	102
ENSDARG00000007175	recql	81	44	57	42	66	61	23	34	64	37	66	90
ENSDARG00000007179	sash1a	400	228	189	113	290	360	211	192	292	118	279	244
ENSDARG00000007180	slc30a4	147	74	36	37	67	72	41	69	76	14	118	117
ENSDARG00000007181	nadk2	250	137	96	71	127	174	94	123	188	83	176	151
ENSDARG00000007184	zbtb16a	468	212	118	72	191	226	156	208	296	86	278	440
ENSDARG00000007186	ppp1r8a	135	92	55	29	54	89	27	43	118	38	100	179
ENSDARG00000007195	grm2b	30	9	22	18	17	34	35	32	8	8	17	17
ENSDARG00000007196	rae1	46	26	48	44	56	73	49	71	71	29	74	86
ENSDARG00000007198	mta1	412	199	163	93	170	294	95	127	175	64	251	244
ENSDARG00000007199		16	11	36	6	14	31	9	4	27	14	11	3
ENSDARG00000007216	abce1	132	65	73	44	77	105	44	76	74	63	120	84
ENSDARG00000007217	wdr55	73	51	42	21	49	52	41	25	82	48	103	71
ENSDARG00000007219	actn1	89	45	153	85	159	272	73	84	145	107	175	134
ENSDARG00000007220	ncam1b	51	50	55	22	54	100	40	8	76	76	48	46
ENSDARG00000007221	pbk	51	33	26	13	28	43	16	16	33	33	17	27
ENSDARG00000007231	ryk	168	113	122	90	132	171	44	62	102	86	138	168
ENSDARG00000007241	mycb	431	275	192	127	282	418	290	255	351	210	416	254
ENSDARG00000007244	acp2	218	143	117	66	169	247	138	156	152	37	262	253
ENSDARG00000007245	rundc3aa	38	21	20	22	14	59	2	21	39	2	35	23
ENSDARG00000007247	ric8a	333	163	215	126	230	310	173	274	310	116	384	348
ENSDARG00000007250	use1	63	30	32	22	42	51	15	38	49	7	55	49
ENSDARG00000007257	rab5ab	246	129	113	85	139	150	81	84	140	59	175	196
ENSDARG00000007264		35	14	47	25	45	63	33	54	97	1	36	42
ENSDARG00000007271	mynn	31	23	36	29	43	55	36	43	39	2	48	52
ENSDARG00000007275	si:ch211-251b21.1	23	26	106	88	149	178	167	124	256	136	161	159
ENSDARG00000007277	myf5	58	17	25	10	32	28	1	14	24	10	14	26
ENSDARG00000007278	ect2	503	282	269	155	247	344	173	214	280	102	503	397
ENSDARG00000007285	mrpl57	198	127	58	68	112	162	99	116	129	35	237	245
ENSDARG00000007289	metrnlb	38	31	48	27	34	31	16	10	16	16	21	26
ENSDARG00000007294	aco2	38	19	18	19	44	43	5	18	30	21	30	51
ENSDARG00000007302	sh3gl3b	103	56	119	47	98	120	93	59	96	96	68	61
ENSDARG00000007315	tmpoa	124	77	84	48	101	161	33	89	87	61	166	88
ENSDARG00000007320	rpl7	86	65	51	36	70	102	48	94	79	56	101	76
ENSDARG00000007323	chmp4bb	8	5	14	1	4	8	0	0	0	0	2	0
ENSDARG00000007329	tbx16	28	16	13	10	10	3	12	4	0	8	8	6
ENSDARG00000007344	tcap	203	161	70	41	78	104	51	89	112	49	184	143
ENSDARG00000007347	degs1	340	149	157	111	209	198	177	292	268	114	427	372
ENSDARG00000007349	dmrt1	29	21	35	21	16	35	4	9	14	15	23	19
ENSDARG00000007356	fgf20a	8	5	1	1	5	19	0	11	10	4	10	10
ENSDARG00000007358	cxcr3.1	19	19	28	11	14	10	13	0	8	12	5	0
ENSDARG00000007359	zgc:56596	43	24	22	17	18	41	1	25	16	7	34	30
ENSDARG00000007362	sft2d1	19	12	13	10	11	15	12	6	20	17	11	5
ENSDARG00000007366	si:ch73-71d17.1	45	23	38	24	43	49	14	14	33	52	15	15
ENSDARG00000007369	tcf7l1b	41	11	15	12	16	21	2	29	12	11	10	6
ENSDARG00000007370	dysf	49	23	28	22	37	30	25	19	19	7	45	34
ENSDARG00000007371	slc26a3.1	4	5	8	1	1	9	0	1	0	1	4	3
ENSDARG00000007377	odc1	1448	782	463	304	576	782	530	607	747	292	841	863
ENSDARG00000007382	ubtd1a	28	20	60	32	99	127	42	36	69	107	72	68
ENSDARG00000007383	kcnk6	62	35	31	29	28	43	18	10	34	40	22	29
ENSDARG00000007387	irf2a	140	75	79	59	98	134	86	145	106	55	247	301
ENSDARG00000007396	rnd3b	90	69	89	47	60	134	38	100	93	24	159	153
ENSDARG00000007398	lrrk1	78	37	40	43	66	59	22	42	100	20	86	72
ENSDARG00000007405	strap	17	16	13	11	24	9	7	25	10	3	10	25
ENSDARG00000007406	phox2a	100	61	51	33	42	93	48	26	38	19	50	53
ENSDARG00000007407	barx1	71	44	47	25	40	67	20	27	38	32	59	56
ENSDARG00000007409	ppifa	103	55	75	39	53	98	37	46	93	45	93	85
ENSDARG00000007412	slc2a1b	629	414	332	244	409	441	298	496	343	223	585	695
ENSDARG00000007413	arid2	426	231	132	107	254	299	189	244	206	75	351	261
ENSDARG00000007418	chmp4c	25	23	22	14	17	46	5	2	30	5	46	36
ENSDARG00000007421	ftcd	9	3	28	5	12	17	11	0	18	4	26	24
ENSDARG00000007425	apol1	168	102	165	108	161	250	165	138	181	60	263	220
ENSDARG00000007429	ndor1	61	44	50	45	63	108	18	55	83	32	64	32
ENSDARG00000007430	prdm12b	20	17	16	13	21	38	19	5	16	2	5	13
ENSDARG00000007436	avpr2aa	90	45	42	28	50	58	14	22	54	19	38	49
ENSDARG00000007438	ube2ib	70	40	33	33	59	76	14	54	41	38	61	59
ENSDARG00000007443	fbxl18	58	42	35	19	38	50	16	29	46	34	50	114
ENSDARG00000007444	ift81	100	49	57	34	51	94	35	105	81	60	88	111
ENSDARG00000007449	slc25a39	262	141	75	40	80	115	75	68	45	29	68	141
ENSDARG00000007461	srgap1a	76	33	65	30	52	72	44	40	43	42	83	47
ENSDARG00000007465	tdrd1	3	4	1	3	14	10	0	1	0	7	1	2
ENSDARG00000007467	ifit10	9	4	5	3	8	18	0	0	11	12	6	1
ENSDARG00000007480	rpe65a	22	7	50	32	51	61	35	13	50	18	60	60
ENSDARG00000007485	epc2	174	125	122	68	158	177	120	161	90	100	262	238
ENSDARG00000007490	adrb1	112	53	80	34	64	76	43	29	65	35	60	58
ENSDARG00000007494	st3gal8	169	73	99	52	121	102	96	80	98	109	207	184
ENSDARG00000007496	ufl1	30	9	29	27	22	71	14	8	33	17	20	12
ENSDARG00000007523	kmt2e	194	140	81	74	124	185	105	166	192	52	262	221
ENSDARG00000007526	ndufs2	340	216	122	82	232	251	128	183	195	90	276	280
ENSDARG00000007531	zcchc9	73	41	46	23	54	49	36	67	39	5	32	45
ENSDARG00000007534	itln1	75	33	43	15	43	33	7	5	33	33	56	41
ENSDARG00000007553	opn4.1	16	28	39	19	24	61	39	7	46	72	20	15
ENSDARG00000007560	sema3bl	108	46	57	36	76	110	33	20	35	60	37	51
ENSDARG00000007566	appbp2	356	191	138	68	177	238	165	110	158	77	245	270
ENSDARG00000007576	crybb1l1	3	0	11	5	6	14	12	4	6	13	7	3
ENSDARG00000007582	si:ch1073-155h21.1	34	28	26	14	29	32	4	9	57	29	19	7
ENSDARG00000007597	bloc1s4	263	135	122	127	204	240	140	189	229	95	312	314
ENSDARG00000007601	zmynd8	60	20	72	56	115	177	97	91	140	86	156	141
ENSDARG00000007603	stxbp2	177	81	83	49	111	151	54	58	110	43	142	153
ENSDARG00000007614	wwox	29	24	17	17	31	36	4	10	11	42	15	27
ENSDARG00000007624	gins1	75	41	65	28	59	82	69	55	57	32	57	77
ENSDARG00000007630	mkrn2	39	27	30	11	36	39	5	49	9	10	36	31
ENSDARG00000007639	cnot4b	160	114	77	54	111	68	93	88	122	83	172	117
ENSDARG00000007654	nsfa	82	41	61	45	42	87	36	42	60	38	66	48
ENSDARG00000007655	crybb1l3	55	19	14	8	4	47	27	10	26	26	40	26
ENSDARG00000007657	ccnh	64	33	29	21	30	65	30	31	42	41	55	43
ENSDARG00000007663	amph	38	45	68	44	59	91	30	42	45	60	61	38
ENSDARG00000007671	ghrb	62	48	50	31	60	82	34	88	135	25	53	65
ENSDARG00000007678	ttyh3b	148	75	147	79	120	103	116	102	135	93	161	139
ENSDARG00000007682	ppdpfa	347	210	119	59	146	199	117	114	134	80	193	218
ENSDARG00000007691	cul1b	334	134	122	80	164	275	137	180	200	87	289	239
ENSDARG00000007693	nfkbiab	682	379	300	185	372	481	331	428	457	162	596	675
ENSDARG00000007697	fabp7a	60	33	53	48	57	50	52	52	38	72	42	54
ENSDARG00000007708	nsa2	26	15	7	3	11	15	0	0	4	9	13	10
ENSDARG00000007709	adamts8a	89	53	74	29	106	119	31	55	22	39	110	84
ENSDARG00000007711	rab3il1	60	22	43	24	71	34	3	23	14	25	42	12
ENSDARG00000007720	sub1b	108	43	76	38	44	83	46	56	51	32	82	94
ENSDARG00000007722	nudt8	10	17	23	15	44	66	6	10	20	8	15	11
ENSDARG00000007723	efnb1	322	187	136	107	212	272	185	256	282	80	279	257
ENSDARG00000007727	rgl2	1318	679	227	151	211	368	140	143	265	119	301	275
ENSDARG00000007734	stn1	91	64	51	37	106	114	63	68	32	3	121	90
ENSDARG00000007737	zyg11	208	120	148	88	131	211	139	127	240	85	295	161
ENSDARG00000007739	atp1a1a.2	524	362	292	169	338	457	315	324	234	167	478	468
ENSDARG00000007743	il15l	61	37	48	33	56	56	46	28	114	107	79	99
ENSDARG00000007744	tsr1	131	81	37	27	85	110	42	68	101	41	122	121
ENSDARG00000007745	uqcrfs1	242	153	163	101	195	248	121	171	208	112	303	254
ENSDARG00000007751	lmnl3	184	95	65	39	91	118	83	119	72	21	177	115
ENSDARG00000007753	cpne2	34	23	46	26	71	77	40	10	77	25	118	53
ENSDARG00000007760	spg21	45	28	37	14	38	28	26	31	41	49	77	78
ENSDARG00000007764	klhdc10	12	5	22	4	23	22	17	10	0	25	13	3
ENSDARG00000007769	sult5a1	6	9	9	4	14	11	2	3	0	0	12	8
ENSDARG00000007774	vash2	524	283	316	191	445	509	413	407	338	193	583	673
ENSDARG00000007783	blk	43	23	19	27	36	41	12	33	14	71	72	65
ENSDARG00000007786	tmx2b	254	147	141	83	212	268	177	237	218	117	313	316
ENSDARG00000007787	zgc:112965	8	10	10	2	5	9	13	11	5	0	4	1
ENSDARG00000007788	atp2b1b	229	98	123	101	117	185	84	78	151	87	126	103
ENSDARG00000007791	ppp2r1ba	168	75	57	55	114	115	53	65	106	39	148	134
ENSDARG00000007795	cst3	92	70	77	26	124	123	93	99	108	53	162	177
ENSDARG00000007804	gas6	49	18	35	20	28	36	10	18	13	20	18	16
ENSDARG00000007807	cyth3a	63	37	25	15	59	68	37	15	21	17	48	40
ENSDARG00000007808	zdhhc16a	23	15	5	6	14	19	10	15	14	6	28	19
ENSDARG00000007812	sp3b	269	162	120	80	139	185	87	117	222	27	117	143
ENSDARG00000007813	rnpepl1	583	238	118	109	126	182	75	116	140	142	187	227
ENSDARG00000007818	palm1b	178	137	103	74	105	161	102	103	169	70	160	106
ENSDARG00000007823	atf3	601	346	249	158	220	317	200	341	349	157	457	445
ENSDARG00000007824	camta1b	93	85	129	74	89	194	44	55	151	104	95	72
ENSDARG00000007825	map2k1	15	4	12	2	1	12	6	11	6	5	2	1
ENSDARG00000007836	ctsla	238	166	142	125	222	286	161	374	298	191	437	297
ENSDARG00000007856	rtn4rl1a	27	15	32	18	20	32	24	6	8	54	11	17
ENSDARG00000007863	tra2a	37	13	25	5	18	19	7	8	15	15	6	13
ENSDARG00000007867	dazap2	179	90	59	41	81	131	88	66	78	69	193	194
ENSDARG00000007869	ehd3	364	187	152	105	228	289	194	159	182	69	217	246
ENSDARG00000007886	slc35b2	152	113	64	56	80	110	73	73	49	72	110	133
ENSDARG00000007891	meox1	64	45	41	26	53	76	16	31	16	67	45	23
ENSDARG00000007892	pdcd2	25	17	5	10	10	6	3	0	16	0	1	21
ENSDARG00000007901	crnkl1	188	113	85	38	80	99	71	61	94	73	140	142
ENSDARG00000007906	lrp2b	1	3	6	10	15	45	0	0	5	3	6	0
ENSDARG00000007912	si:ch211-196i2.1	10	9	53	28	27	49	5	17	103	40	26	34
ENSDARG00000007916	xpnpep3	445	233	168	117	238	399	225	212	351	107	404	351
ENSDARG00000007918	ttc27	163	107	87	54	114	148	75	91	111	51	121	132
ENSDARG00000007923	ptpn1	825	490	342	217	470	591	503	671	451	234	817	804
ENSDARG00000007941	hmx4	53	38	42	35	49	43	33	42	29	32	32	61
ENSDARG00000007943	gabpb2a	66	56	39	22	39	72	40	27	52	9	85	90
ENSDARG00000007944	lhx1b	114	71	31	16	35	67	12	36	36	50	36	35
ENSDARG00000007950	itga11b	57	47	69	16	44	62	32	32	40	33	54	49
ENSDARG00000007959	hibadhb	452	245	228	144	296	387	332	298	312	102	432	441
ENSDARG00000007960	hnrnpaba	262	158	184	131	216	322	234	307	188	157	388	285
ENSDARG00000007976	si:ch211-220f16.2	22	12	34	13	23	42	10	7	25	0	26	22
ENSDARG00000007982	onecut1	149	91	87	54	100	108	41	50	91	154	86	75
ENSDARG00000007988	masp2	24	17	1	7	8	1	1	10	5	13	2	1
ENSDARG00000007989	nedd8	17	12	14	4	23	9	5	18	19	11	5	18
ENSDARG00000007990	wt1b	41	23	23	13	31	62	12	13	38	66	41	33
ENSDARG00000007996	pou2f1b	158	101	113	58	131	177	124	103	160	98	175	113
ENSDARG00000008010	zgc:194189	45	32	40	34	80	80	32	10	18	48	51	31
ENSDARG00000008014	nudt17	79	24	26	24	32	60	47	89	61	69	88	85
ENSDARG00000008020	med31	0	3	9	7	4	11	4	0	24	0	0	2
ENSDARG00000008022	kif18a	207	103	76	70	81	109	81	110	111	36	198	210
ENSDARG00000008026	fam129bb	266	153	133	73	78	173	65	114	108	61	114	121
ENSDARG00000008029	mep1a.2	1	2	8	0	12	12	0	1	8	5	6	9
ENSDARG00000008032	sart3	12	4	6	4	9	11	13	1	13	0	3	1
ENSDARG00000008034	skib	81	64	66	34	69	98	16	19	74	29	59	35
ENSDARG00000008049	si:dkey-42i9.4	151	62	53	26	56	79	39	74	53	0	109	83
ENSDARG00000008060	scara3	47	28	56	33	69	100	27	41	20	34	16	40
ENSDARG00000008068	tma16	18	14	23	6	8	24	8	9	49	24	16	36
ENSDARG00000008095	olfcd1	8	9	26	9	21	23	8	12	0	52	9	1
ENSDARG00000008097	srsf9	116	63	108	42	85	129	28	67	53	48	88	75
ENSDARG00000008098	ifit9	46	16	38	16	62	41	5	23	73	21	24	10
ENSDARG00000008100	slc7a10a	69	43	45	22	59	87	28	29	94	12	81	73
ENSDARG00000008107	src	65	47	41	40	60	60	14	19	35	32	45	44
ENSDARG00000008119	si:ch211-195d17.2	198	120	100	62	121	174	91	92	103	39	205	101
ENSDARG00000008127	pcdh15b	49	33	59	39	42	55	13	45	80	58	28	40
ENSDARG00000008131	sox1b	60	45	87	29	58	41	25	11	31	25	30	31
ENSDARG00000008133	foxl1	61	40	42	33	44	46	27	3	65	39	22	27
ENSDARG00000008140	kcnab1a	22	9	7	6	19	15	1	11	17	17	18	0
ENSDARG00000008141	rbl1	371	197	117	97	163	193	116	156	145	103	228	233
ENSDARG00000008142	stxbp3	69	59	73	53	53	87	38	29	116	54	98	90
ENSDARG00000008153	serinc5	209	117	73	52	65	97	38	118	83	44	149	112
ENSDARG00000008155	sms	12	7	13	19	10	15	0	21	40	28	9	18
ENSDARG00000008164	btr33	0	1	14	11	0	9	0	8	2	0	6	0
ENSDARG00000008165	caspa	38	10	17	15	32	43	20	36	11	33	41	62
ENSDARG00000008170	dbnla	16	9	5	6	13	8	12	8	0	10	16	3
ENSDARG00000008174	hoxb1a	121	95	63	34	45	97	24	24	65	60	56	57
ENSDARG00000008184	mia3	950	626	299	195	373	429	304	306	354	205	418	450
ENSDARG00000008186	syk	26	23	26	13	35	55	30	51	87	16	52	58
ENSDARG00000008188	sf1	82	46	40	18	47	72	30	32	34	45	14	37
ENSDARG00000008191	tmeff1a	63	40	29	19	45	45	27	23	42	34	58	32
ENSDARG00000008192	pank1a	443	225	199	129	213	296	209	259	299	101	324	406
ENSDARG00000008200	ugp2b	92	42	41	30	69	101	29	100	25	21	105	52
ENSDARG00000008203	pax1a	68	37	47	35	26	75	12	30	18	30	32	58
ENSDARG00000008209	myt1la	1	2	5	2	11	19	7	15	10	11	0	0
ENSDARG00000008212	kcnk13a	37	14	2	7	15	16	9	1	23	8	9	12
ENSDARG00000008218	znf410	171	92	40	35	60	80	44	81	85	45	71	74
ENSDARG00000008219	crygm4	13	11	15	13	23	36	20	18	18	26	26	18
ENSDARG00000008224	vps35	91	57	54	29	74	86	20	49	43	41	90	46
ENSDARG00000008235	cog5	53	18	21	15	40	37	25	32	25	21	41	21
ENSDARG00000008237	sars	147	57	72	31	66	71	22	37	39	14	91	110
ENSDARG00000008238	manba	35	21	31	14	47	71	6	48	43	19	57	31
ENSDARG00000008239	mocs3	164	95	138	81	79	136	86	87	151	34	225	206
ENSDARG00000008243	cct8	178	117	77	39	110	141	53	110	137	65	136	149
ENSDARG00000008247	vezf1a	143	89	54	48	79	104	58	121	80	12	134	176
ENSDARG00000008249	ptchd4	78	51	64	27	48	114	20	52	114	67	74	28
ENSDARG00000008255	cnot6a	483	311	267	161	360	487	252	418	447	204	671	588
ENSDARG00000008275	klhl24b	406	236	181	131	244	305	230	242	365	111	464	355
ENSDARG00000008278	rcor2	430	242	141	120	199	220	110	164	172	55	205	224
ENSDARG00000008279	map2k7	170	98	84	48	106	136	78	88	124	40	179	108
ENSDARG00000008287	fam114a1	332	213	166	79	161	215	140	152	121	64	232	241
ENSDARG00000008292	eif2s3	42	30	11	20	32	30	30	7	23	24	40	30
ENSDARG00000008305	hand2	68	46	65	35	60	87	22	23	62	70	0	0
ENSDARG00000008306	rdh5	2	4	7	5	8	27	0	0	8	0	1	0
ENSDARG00000008310	ip6k2a	829	496	340	276	507	536	394	443	547	250	693	647
ENSDARG00000008322	ambra1a	48	34	42	28	37	82	12	0	65	72	23	28
ENSDARG00000008329	asic1a	7	3	13	5	4	9	3	0	0	27	2	4
ENSDARG00000008333	znfl2a	560	266	67	51	94	95	75	43	89	51	91	110
ENSDARG00000008363	mcl1b	310	173	171	148	244	290	200	289	287	121	501	471
ENSDARG00000008370	csnk1da	230	131	92	59	103	157	152	113	196	114	130	176
ENSDARG00000008372	spred2b	95	50	26	19	42	61	47	19	31	74	54	39
ENSDARG00000008377	epn2	674	364	179	119	195	221	187	204	248	79	272	311
ENSDARG00000008380	brd7	155	75	54	25	64	123	69	40	131	61	90	100
ENSDARG00000008383	arpc1a	271	139	144	70	174	214	155	87	131	38	276	168
ENSDARG00000008384	hdac6	251	172	172	77	131	232	141	235	233	99	289	309
ENSDARG00000008388	mmp14b	82	70	55	33	50	76	58	63	34	11	113	100
ENSDARG00000008395	snupn	213	150	73	45	86	99	60	74	74	51	71	76
ENSDARG00000008398	cacna1c	94	43	59	39	78	95	23	45	63	57	58	25
ENSDARG00000008403	phospho1	1	3	2	1	12	15	0	0	0	0	6	0
ENSDARG00000008407	tspan7b	571	312	247	177	437	561	301	332	341	185	578	563
ENSDARG00000008413	atp11a	231	112	199	158	222	318	194	262	237	92	290	315
ENSDARG00000008433	unc45b	142	95	52	50	55	82	7	17	38	38	47	83
ENSDARG00000008434	bcl2l1	454	235	235	171	275	495	277	276	416	147	464	578
ENSDARG00000008439	atxn10	35	27	18	12	16	24	11	8	21	13	14	31
ENSDARG00000008447	fkbp4	146	77	87	69	130	184	88	78	147	88	197	206
ENSDARG00000008450	pcolce2a	67	47	104	75	76	124	91	75	103	63	103	114
ENSDARG00000008454	cpeb1b	59	27	38	21	53	43	3	26	23	8	49	47
ENSDARG00000008457	faah2a	112	82	85	66	77	88	78	59	57	66	97	149
ENSDARG00000008461	anapc5	140	78	82	80	84	155	55	108	98	53	142	142
ENSDARG00000008472	apex2	85	39	42	37	48	84	31	29	55	23	66	78
ENSDARG00000008480	trmt61a	286	158	229	157	327	350	281	406	417	114	565	492
ENSDARG00000008485	lrp3	409	242	78	44	82	127	67	88	92	76	152	103
ENSDARG00000008487	dmd	392	251	362	209	331	401	98	162	258	140	243	254
ENSDARG00000008490	ltv1	49	61	82	39	47	77	32	27	52	32	68	63
ENSDARG00000008491	si:ch211-107o10.3	101	49	58	65	91	87	48	44	68	49	151	108
ENSDARG00000008502	pno1	100	69	53	29	60	75	32	20	58	36	47	47
ENSDARG00000008503	glcci1a	807	439	300	218	432	540	458	607	402	143	731	715
ENSDARG00000008540	sox21b	83	41	58	41	38	61	18	34	72	61	85	26
ENSDARG00000008542	yod1	199	92	89	36	57	127	32	65	141	73	173	114
ENSDARG00000008548	arhgap12a	36	18	23	12	33	37	14	15	37	17	23	17
ENSDARG00000008551	pole3	95	38	42	22	56	103	51	52	56	60	51	71
ENSDARG00000008553	zgc:136872	7	3	4	2	5	11	0	0	0	9	10	0
ENSDARG00000008568	slc25a24	14	14	21	17	28	33	22	34	5	18	17	8
ENSDARG00000008573	fam20b	51	35	70	54	114	157	27	54	35	49	97	96
ENSDARG00000008575	lyst	1858	1080	661	400	763	1112	662	805	759	369	1022	1250
ENSDARG00000008592	mtmr8	160	125	81	55	65	96	43	43	49	120	118	108
ENSDARG00000008593	nbas	107	48	64	43	88	131	87	69	73	45	88	92
ENSDARG00000008623	cops3	157	112	93	52	94	167	60	95	128	44	107	150
ENSDARG00000008637	mttp	62	37	83	26	76	72	30	24	57	35	104	38
ENSDARG00000008660	coro1b	123	90	95	32	99	84	52	34	64	36	101	114
ENSDARG00000008662	fign	63	45	28	12	34	37	20	17	61	110	26	26
ENSDARG00000008678	snx3	364	214	133	52	132	215	106	143	179	20	221	246
ENSDARG00000008697	epas1a	135	95	102	61	112	149	72	99	150	38	164	166
ENSDARG00000008706	paip2b	79	53	68	41	61	134	62	24	76	68	70	95
ENSDARG00000008720	lmo3	11	19	37	12	19	27	5	14	44	2	19	11
ENSDARG00000008723	prkcba	169	71	82	46	75	131	76	50	78	65	131	126
ENSDARG00000008727	ranbp3a	100	40	54	33	48	92	57	47	109	49	69	96
ENSDARG00000008732	zgc:66479	49	22	29	24	42	40	17	16	37	57	29	22
ENSDARG00000008735	atp6ap2	203	109	118	52	129	174	75	149	138	46	230	149
ENSDARG00000008748	ube2na	126	87	61	27	84	60	35	58	35	55	97	97
ENSDARG00000008757	entpd6	172	94	82	40	69	79	63	65	138	50	122	104
ENSDARG00000008765	tmed5	71	58	42	39	51	68	48	61	52	37	126	102
ENSDARG00000008767	tle2b	85	48	51	40	55	75	24	84	51	31	95	75
ENSDARG00000008772	cacng1a	21	15	29	17	13	36	0	26	9	34	16	25
ENSDARG00000008784	prpf4ba	28	30	20	22	27	49	7	28	4	6	12	11
ENSDARG00000008785	dldh	57	28	43	16	34	109	29	38	39	18	63	42
ENSDARG00000008788	camk1gb	48	39	49	22	33	58	3	11	27	58	18	27
ENSDARG00000008790	actr3b	84	43	103	72	176	222	133	234	219	72	267	239
ENSDARG00000008796	her5	33	17	26	5	19	25	14	23	15	7	12	7
ENSDARG00000008803	marcksb	328	167	163	115	188	269	116	91	211	103	209	164
ENSDARG00000008805	orc3	14	7	11	12	5	11	0	0	7	2	18	15
ENSDARG00000008807	bokb	21	18	24	6	10	22	8	17	13	48	22	6
ENSDARG00000008808	eml2	230	135	190	148	265	339	203	242	210	155	300	335
ENSDARG00000008811	cmtm3	144	80	79	45	70	108	45	32	124	71	94	81
ENSDARG00000008816	glud1a	35	26	32	21	42	19	40	52	24	51	72	51
ENSDARG00000008818	hsf1	57	32	47	25	47	113	32	27	23	44	40	36
ENSDARG00000008832	neu1	91	70	51	34	59	72	48	88	46	35	93	102
ENSDARG00000008835	si:dkey-46g23.5	5	6	13	5	7	7	0	0	1	1	2	10
ENSDARG00000008840	hmbsa	793	365	203	133	233	337	172	182	158	115	334	341
ENSDARG00000008849	ptprq	9	5	9	5	24	14	13	0	8	7	0	0
ENSDARG00000008852	elp4	466	254	276	152	318	363	308	419	379	179	600	599
ENSDARG00000008858	cyp7b1	83	44	36	7	22	59	5	20	33	7	25	36
ENSDARG00000008859	mylipa	540	289	293	196	291	385	260	390	428	96	455	494
ENSDARG00000008861	tfap2e	81	51	154	135	235	350	225	178	189	132	227	204
ENSDARG00000008866	cabp4	15	11	8	1	4	21	12	0	0	0	6	15
ENSDARG00000008867	rap1b	361	214	171	113	247	336	151	212	326	142	362	294
ENSDARG00000008880	usp28	5	15	22	8	5	11	3	27	31	0	8	30
ENSDARG00000008884	hprt1	178	83	61	54	76	130	40	54	135	54	163	145
ENSDARG00000008886	msx1b	757	456	407	269	353	525	344	246	380	234	485	533
ENSDARG00000008890	ctns	41	26	41	33	37	57	40	50	75	15	144	81
ENSDARG00000008904	smarca2	574	369	296	192	405	422	462	456	400	274	672	717
ENSDARG00000008906	si:ch211-241e1.5	37	18	28	20	29	20	1	28	19	19	29	26
ENSDARG00000008912	slc8a2a	3	6	13	4	7	8	0	0	0	8	5	3
ENSDARG00000008920	mrpl53	74	38	8	18	28	26	11	19	18	19	27	15
ENSDARG00000008931	renbp	94	51	136	97	155	230	153	251	225	113	280	242
ENSDARG00000008936	sec11a	16	16	28	18	27	25	1	6	5	14	11	9
ENSDARG00000008946	ccdc127b	50	22	9	7	4	49	6	21	30	6	25	35
ENSDARG00000008947	rtf1	243	111	80	59	110	191	87	86	191	46	245	179
ENSDARG00000008948	pla2g3	17	2	8	13	14	19	1	10	8	7	9	13
ENSDARG00000008953	pofut1	123	62	40	27	78	98	34	27	85	63	75	41
ENSDARG00000008966	tbl1xr1b	699	403	307	244	364	419	346	576	513	284	806	709
ENSDARG00000008969	fgb	39	26	31	17	45	32	0	16	15	11	9	18
ENSDARG00000008976	mdn1	14	17	42	22	54	83	33	32	48	117	27	40
ENSDARG00000008979	golga1	306	205	233	135	257	345	164	263	314	147	400	489
ENSDARG00000008982	casq2	28	7	12	5	12	22	16	4	34	9	13	12
ENSDARG00000008983	sh3glb2a	17	17	31	17	29	28	2	8	6	6	29	28
ENSDARG00000008986	e2f7	856	489	232	134	312	354	321	330	334	114	531	563
ENSDARG00000009001	pdia6	556	263	184	135	319	398	200	279	283	104	460	408
ENSDARG00000009014	col11a1b	27	19	25	9	18	46	12	16	16	7	10	18
ENSDARG00000009018	rhbg	5	4	7	2	6	8	0	3	0	0	2	0
ENSDARG00000009020	cnr1	14	22	16	14	9	44	3	17	21	8	7	1
ENSDARG00000009021	chrna1	70	41	74	31	68	87	24	24	63	7	85	97
ENSDARG00000009023	ankrd28b	12	5	6	7	11	10	0	1	0	8	3	0
ENSDARG00000009026	ank2a	18	5	23	10	16	40	10	2	11	22	27	25
ENSDARG00000009031	tnikb	213	116	101	68	90	189	69	88	87	46	136	72
ENSDARG00000009040	si:ch73-141c7.1	117	85	65	54	89	110	31	69	64	56	164	117
ENSDARG00000009074	cbr4	57	40	29	28	65	92	18	23	22	69	46	49
ENSDARG00000009079		23	12	15	8	13	26	12	20	21	24	38	27
ENSDARG00000009087	cd74a	56	32	32	12	27	46	13	17	30	12	41	54
ENSDARG00000009094	gata2b	75	45	29	28	26	50	11	6	3	0	16	6
ENSDARG00000009106	serinc1	124	75	59	48	81	126	92	88	70	55	167	222
ENSDARG00000009123	sele	37	21	13	6	19	9	0	4	12	0	7	7
ENSDARG00000009131	slc10a4	119	77	40	21	36	45	14	27	12	55	48	21
ENSDARG00000009133	myo1eb	12	4	11	10	11	25	4	2	10	16	5	18
ENSDARG00000009134	hlx1	129	64	72	47	66	139	62	62	64	52	110	44
ENSDARG00000009136	tp53bp2a	22	8	20	14	21	16	5	16	2	10	30	5
ENSDARG00000009142	ppp1r13bb	96	67	74	41	130	85	46	62	62	68	67	57
ENSDARG00000009160	kmo	11	17	19	12	40	44	25	52	13	6	56	38
ENSDARG00000009161	ftr55	5	11	8	10	9	17	0	2	9	10	3	2
ENSDARG00000009169	mob1ba	180	103	164	101	162	177	117	83	237	106	169	216
ENSDARG00000009170	ctr9	152	112	88	56	87	132	59	73	64	54	137	142
ENSDARG00000009178	zfand1	3	1	5	0	13	8	3	5	0	0	2	10
ENSDARG00000009194	col16a1	175	96	274	137	249	325	174	196	202	138	195	228
ENSDARG00000009208	prkcda	82	32	31	23	35	40	5	20	3	29	49	42
ENSDARG00000009209	slc9a6a	253	128	59	54	141	111	60	87	140	43	144	130
ENSDARG00000009212	ppiaa	398	231	444	268	479	633	405	523	525	207	844	823
ENSDARG00000009214	mfsd13a	188	93	75	46	108	152	90	109	100	64	141	234
ENSDARG00000009215	zgc:112437	99	49	58	33	27	56	19	22	43	4	68	61
ENSDARG00000009217	tom1l2	405	213	205	138	243	314	220	191	318	113	357	347
ENSDARG00000009218	mars2	62	44	54	28	49	108	29	39	71	40	67	118
ENSDARG00000009242	fev	80	47	45	14	35	43	7	9	28	39	45	14
ENSDARG00000009250	etfb	640	406	423	255	504	682	366	597	510	280	856	1024
ENSDARG00000009252	napepld	166	63	60	41	103	96	48	95	91	50	143	127
ENSDARG00000009253	rtraf	12	16	35	11	40	42	45	38	5	12	13	23
ENSDARG00000009262	si:dkey-97m3.1	72	42	49	26	29	47	8	27	21	8	55	56
ENSDARG00000009266	uevld	2	3	12	1	5	20	10	1	1	0	0	2
ENSDARG00000009267	zgc:136439	402	228	154	99	267	224	217	231	269	80	342	374
ENSDARG00000009273	ppm1da	82	33	57	28	67	50	33	51	44	33	61	25
ENSDARG00000009280	smyd1a	8	7	9	6	2	14	3	0	9	14	3	6
ENSDARG00000009281	dnm1b	13	11	28	5	27	40	4	4	30	10	2	2
ENSDARG00000009285	rpl15	112	55	50	49	103	88	92	137	76	84	159	222
ENSDARG00000009311	pvalb6	6	2	11	2	2	9	0	0	15	9	14	12
ENSDARG00000009313	zgc:63831	118	56	40	30	58	85	41	6	81	60	64	75
ENSDARG00000009336	aif1l	230	120	109	70	115	118	89	151	139	32	139	139
ENSDARG00000009341	nrap	13	5	22	9	19	23	0	8	25	8	23	10
ENSDARG00000009342	txndc5	260	173	143	122	239	296	100	291	345	151	399	406
ENSDARG00000009346	caprin1a	80	52	27	8	37	82	22	14	47	23	24	26
ENSDARG00000009350	atg3	127	73	84	61	97	144	54	59	127	49	89	143
ENSDARG00000009351	fgf6a	73	65	68	51	67	116	64	71	98	46	96	55
ENSDARG00000009372	diras1b	17	5	14	1	17	40	0	9	19	34	12	3
ENSDARG00000009387	robo4	8	10	12	10	10	13	4	1	0	14	9	4
ENSDARG00000009390	npl	372	227	107	84	176	291	195	213	184	131	392	362
ENSDARG00000009401	vcanb	95	49	69	40	49	79	32	21	49	41	57	55
ENSDARG00000009418	mef2cb	74	51	58	40	87	143	67	44	158	88	136	139
ENSDARG00000009430	tmem30c	40	17	30	8	17	46	11	13	10	41	10	21
ENSDARG00000009436	ubxn7	59	33	24	24	48	82	23	23	61	19	53	58
ENSDARG00000009443	zgc:92137	15	3	7	3	4	8	0	0	14	5	1	0
ENSDARG00000009447	atp5mc3b	204	110	111	69	117	116	116	114	114	76	130	179
ENSDARG00000009459	slc35e4	263	120	140	107	214	276	170	184	211	151	237	303
ENSDARG00000009466	rgs9bp	34	14	19	16	24	17	2	0	20	17	3	14
ENSDARG00000009470	hnf1a	32	22	25	16	20	32	1	5	5	33	28	25
ENSDARG00000009471	nid2b	98	48	69	41	85	102	62	59	21	44	111	134
ENSDARG00000009472	med19b	59	31	34	13	53	67	27	37	44	26	29	25
ENSDARG00000009473	ppardb	147	51	65	37	52	97	43	39	100	36	67	92
ENSDARG00000009477	prkar2ab	2	6	6	0	9	11	1	3	7	0	10	13
ENSDARG00000009482	slc38a8a	29	21	47	10	20	53	23	7	26	42	15	14
ENSDARG00000009488	gipc2	55	45	68	27	63	83	42	73	65	52	65	81
ENSDARG00000009493	si:ch211-45c16.2	92	53	78	25	58	123	74	118	126	28	113	105
ENSDARG00000009494	xrcc1	205	125	84	38	55	133	91	92	76	47	103	160
ENSDARG00000009499	syne1a	261	144	105	51	65	145	53	72	89	48	114	93
ENSDARG00000009505	prelid3b	443	265	391	241	484	689	426	472	507	184	672	640
ENSDARG00000009511	tnfa	4	3	13	6	2	17	10	7	11	0	23	17
ENSDARG00000009524	rnf150b	277	153	118	91	160	211	128	79	169	66	162	164
ENSDARG00000009525	tial1	116	73	72	37	93	82	44	45	50	30	92	101
ENSDARG00000009534	wls	147	114	98	66	81	158	98	101	130	69	181	126
ENSDARG00000009544	cldnb	31	32	40	17	54	87	14	46	46	28	86	143
ENSDARG00000009549	ubr4	275	163	118	81	161	219	96	175	192	80	248	301
ENSDARG00000009550	foxi3b	78	63	75	30	58	67	18	6	36	47	46	47
ENSDARG00000009553	gng3	15	10	9	3	19	50	25	18	48	0	47	31
ENSDARG00000009557	wrap73	136	71	94	60	95	120	86	155	67	30	161	152
ENSDARG00000009567	spegb	6	12	13	0	8	11	0	1	0	4	11	2
ENSDARG00000009568	ca10b	33	16	4	10	14	20	3	11	9	20	37	8
ENSDARG00000009585	papola	16	15	28	20	23	48	63	45	71	27	33	58
ENSDARG00000009594	nr1d2b	1955	1095	916	552	874	1117	736	1175	1381	503	1756	1680
ENSDARG00000009607	ccnc	30	33	26	15	34	15	16	29	29	9	26	13
ENSDARG00000009610	rgs12a	497	258	141	94	133	256	99	132	197	140	288	261
ENSDARG00000009612	chia.3	8	7	10	14	20	17	5	0	18	8	7	8
ENSDARG00000009624		20	11	20	8	8	23	1	7	16	24	16	1
ENSDARG00000009626	nrbp2b	24	15	24	14	22	17	3	13	16	14	15	37
ENSDARG00000009629	unc119.1	152	72	76	66	82	132	59	80	121	71	134	140
ENSDARG00000009637	rcvrn3	27	9	15	13	12	37	11	7	14	8	36	11
ENSDARG00000009640	psmb1	142	90	44	33	77	81	42	40	75	41	143	123
ENSDARG00000009653	lhfpl2a	523	282	153	113	167	205	124	153	168	68	153	173
ENSDARG00000009657	fgfr1op2	220	84	41	33	60	78	51	63	82	52	102	100
ENSDARG00000009677	dlg1	149	107	122	91	156	159	33	58	102	131	106	57
ENSDARG00000009681	med27	102	50	35	6	48	42	48	17	119	9	47	85
ENSDARG00000009685	ppa2	47	50	39	39	65	72	31	43	70	28	89	83
ENSDARG00000009689	daam1b	133	68	74	45	85	122	21	71	76	42	81	98
ENSDARG00000009693	llgl1	407	231	182	145	242	331	217	275	344	108	467	370
ENSDARG00000009702	ascl1b	36	28	29	31	52	69	15	53	46	31	97	100
ENSDARG00000009724	rpn2	215	171	164	95	156	217	107	114	224	29	271	328
ENSDARG00000009733	kif21b	837	484	404	264	498	709	330	596	658	193	926	944
ENSDARG00000009735	gigyf2	295	163	136	92	181	261	125	192	218	105	265	332
ENSDARG00000009738	cacnb4a	209	82	56	25	54	74	26	18	31	10	77	34
ENSDARG00000009740	ppp1r7	107	54	44	40	66	87	51	55	88	3	99	119
ENSDARG00000009743	efhc1	119	78	62	42	80	126	46	93	135	34	137	148
ENSDARG00000009745	fbxw2	442	222	88	63	129	123	56	57	68	71	155	102
ENSDARG00000009748	dffb	44	31	21	9	21	23	23	19	26	13	53	40
ENSDARG00000009753	sf3b6	129	73	66	23	91	98	74	70	57	49	84	78
ENSDARG00000009754	zc3h11a	224	164	83	58	155	219	68	132	129	102	222	234
ENSDARG00000009764	srek1	86	27	31	23	39	32	31	8	61	42	51	82
ENSDARG00000009771	ppme1	525	303	230	161	352	400	290	427	398	189	619	715
ENSDARG00000009779	mcl1a	193	118	62	30	48	103	23	62	48	24	46	51
ENSDARG00000009782	myh11a	53	25	57	14	36	61	8	6	16	45	12	17
ENSDARG00000009796	klc1a	154	102	104	79	161	204	90	64	175	108	290	227
ENSDARG00000009806	smfn	286	153	148	109	211	251	157	236	223	84	302	365
ENSDARG00000009822	her4.4	18	18	28	13	51	40	17	35	50	10	51	41
ENSDARG00000009823	pou3f1	139	87	111	52	92	169	148	103	107	95	231	163
ENSDARG00000009825	mmp23bb	41	31	13	15	16	63	19	16	40	51	18	11
ENSDARG00000009830	hdlbpa	325	146	239	130	230	326	131	183	318	135	360	436
ENSDARG00000009837	agk	14	4	8	9	0	10	0	8	8	12	4	0
ENSDARG00000009839	fam117bb	250	138	179	97	252	308	153	215	351	141	312	300
ENSDARG00000009844	dusp23a	25	21	26	12	13	26	1	7	32	41	11	15
ENSDARG00000009851	wdr41	76	59	55	28	91	69	37	14	65	37	60	60
ENSDARG00000009864	ddx55	35	42	42	21	24	60	15	29	24	17	37	34
ENSDARG00000009868	dcaf11	68	38	44	19	48	78	30	22	54	50	87	108
ENSDARG00000009870	mapk8b	285	193	123	81	114	115	114	127	80	66	235	263
ENSDARG00000009871	snrpc	250	172	113	62	142	178	127	177	144	86	218	278
ENSDARG00000009881	ier5	827	461	388	244	485	715	567	797	676	258	874	981
ENSDARG00000009885	sult3st1	74	52	71	47	60	117	64	80	68	11	75	71
ENSDARG00000009886	rnf114	121	64	90	31	85	97	53	76	103	55	81	135
ENSDARG00000009899	znf385a	154	63	89	63	117	174	38	66	53	68	108	113
ENSDARG00000009901	slc38a5a	124	61	89	51	98	158	97	64	131	34	129	149
ENSDARG00000009922	dmbx1a	119	70	59	29	41	37	36	9	53	35	32	62
ENSDARG00000009930	cadm2a	39	30	44	28	42	19	16	17	71	35	47	18
ENSDARG00000009939	micu2	254	115	74	53	86	111	82	91	79	46	178	184
ENSDARG00000009941	erc1a	46	16	25	20	51	58	32	12	51	6	51	27
ENSDARG00000009942	cdc6	532	318	292	180	297	296	302	388	262	183	613	555
ENSDARG00000009949	fndc4b	60	39	45	21	44	58	4	25	18	63	54	74
ENSDARG00000009950	edf1	129	103	79	60	71	75	68	59	87	37	91	145
ENSDARG00000009953	med14	128	57	94	59	67	159	26	43	54	28	81	38
ENSDARG00000009958	cbl	91	71	58	32	47	76	75	91	95	33	92	92
ENSDARG00000009961	rundc3b	5	5	4	2	9	5	18	10	3	0	6	9
ENSDARG00000009978	icn	22	9	18	9	6	11	12	30	0	0	4	9
ENSDARG00000009982	fam199x	137	96	92	76	131	129	60	103	122	41	252	250
ENSDARG00000010002	gna11a	68	56	162	87	149	170	73	121	173	51	150	116
ENSDARG00000010008	vim	117	92	125	67	85	114	11	44	61	41	66	64
ENSDARG00000010010	trim13	192	108	97	63	104	161	57	106	161	57	191	170
ENSDARG00000010018	qki2	152	61	142	87	165	208	94	144	246	205	248	222
ENSDARG00000010021	grpel1	653	339	236	159	371	484	276	398	457	235	545	670
ENSDARG00000010023		95	70	71	47	67	126	51	64	86	34	97	115
ENSDARG00000010029	spon1a	58	45	50	28	43	60	19	34	66	29	26	32
ENSDARG00000010031	ssh1b	226	127	182	105	176	235	169	203	241	116	248	166
ENSDARG00000010032	cmtm7	103	58	63	80	96	111	115	103	145	100	113	167
ENSDARG00000010035	engase	139	60	66	43	107	120	59	75	95	20	117	136
ENSDARG00000010042	dnm1a	12	9	10	10	15	12	0	5	6	0	0	0
ENSDARG00000010047	neu3.2	28	8	31	27	36	48	7	15	29	7	40	65
ENSDARG00000010051	ufd1l	112	54	29	20	29	58	40	21	49	62	55	76
ENSDARG00000010052	ndrg3b	314	161	153	92	183	184	63	86	144	44	142	181
ENSDARG00000010059	itpkb	37	25	21	10	18	19	11	9	18	0	28	21
ENSDARG00000010070	adam9	35	21	85	42	67	70	66	85	80	21	30	85
ENSDARG00000010075		6	4	3	2	9	7	0	1	32	0	0	0
ENSDARG00000010078	nup133	39	36	53	32	53	118	86	58	123	61	101	96
ENSDARG00000010083	rbfox3a	20	17	54	25	22	39	8	30	56	26	49	25
ENSDARG00000010085	p4ha2	73	47	63	56	61	90	64	62	120	36	111	77
ENSDARG00000010096	slc1a6	11	2	0	3	9	11	3	4	0	0	2	3
ENSDARG00000010097	f9a	25	17	37	15	57	70	12	6	14	24	31	22
ENSDARG00000010098	pank1b	214	117	110	98	129	149	134	148	105	42	232	192
ENSDARG00000010108	bri3bp	5	5	19	8	18	14	6	11	8	6	10	3
ENSDARG00000010113	ndufb8	278	124	104	70	148	181	125	157	172	79	185	149
ENSDARG00000010130	smpdl3b	2	9	25	2	18	23	6	1	1	7	6	9
ENSDARG00000010132	dacha	535	310	298	185	295	393	213	234	358	179	436	467
ENSDARG00000010137	ldb1a	406	193	276	183	375	461	232	261	308	204	424	413
ENSDARG00000010144	plppr3a	303	176	134	98	134	173	191	160	165	77	180	280
ENSDARG00000010149	atp5fa1	218	91	119	73	106	118	96	80	77	76	157	120
ENSDARG00000010154	vstm4a	13	5	4	4	10	6	9	5	10	0	12	3
ENSDARG00000010160	rps15a	299	158	133	110	203	241	115	157	130	41	245	297
ENSDARG00000010169	myd88	23	10	32	11	30	25	1	5	62	0	32	16
ENSDARG00000010181	asap2a	307	112	86	72	159	176	81	139	113	97	170	159
ENSDARG00000010183	si:ch73-265h17.1	7	3	9	1	2	7	0	0	0	0	2	0
ENSDARG00000010186	myo3a	12	3	14	4	5	0	0	0	6	0	12	2
ENSDARG00000010192	pax3a	162	89	193	95	106	162	128	117	170	227	161	172
ENSDARG00000010194	eif4bb	382	224	169	124	261	260	189	289	228	198	479	352
ENSDARG00000010207	smad3b	78	36	64	58	83	109	56	30	95	66	79	62
ENSDARG00000010238	rbm22	278	165	126	74	158	179	57	127	192	91	260	211
ENSDARG00000010244	rpl22l1	359	222	141	76	174	284	239	183	245	99	293	322
ENSDARG00000010246	prmt1	426	230	200	139	252	352	320	319	229	197	487	551
ENSDARG00000010248	wdr54	155	80	88	37	109	154	79	74	114	125	153	145
ENSDARG00000010250	nqo1	62	23	18	11	47	52	23	9	45	52	70	75
ENSDARG00000010252	jak3	51	46	41	22	23	60	14	21	15	44	17	40
ENSDARG00000010255	bin2b	84	44	24	37	46	69	4	24	45	40	30	52
ENSDARG00000010266	igf2bp3	136	71	68	45	67	138	74	79	153	57	171	179
ENSDARG00000010267	dpydb	72	50	58	34	65	50	4	12	39	16	70	49
ENSDARG00000010270	fezf1	44	37	71	40	58	95	33	17	68	101	23	52
ENSDARG00000010276	ptgs2b	40	14	32	31	64	64	62	59	86	40	101	131
ENSDARG00000010279	scamp2	118	81	76	44	57	63	35	29	35	30	88	91
ENSDARG00000010280	clasp1a	140	104	81	59	100	125	36	50	71	67	61	116
ENSDARG00000010281	xpo4	192	106	85	46	109	110	79	51	107	94	115	109
ENSDARG00000010294	fmodb	11	13	24	5	58	30	9	16	20	0	14	5
ENSDARG00000010296	kcnh6b	22	11	22	18	16	17	10	6	11	15	7	0
ENSDARG00000010312	cp	21	20	30	14	19	23	8	6	43	25	13	12
ENSDARG00000010316	qars	257	184	179	107	177	315	161	183	188	130	367	361
ENSDARG00000010317	gpr183a	56	25	34	33	66	101	63	150	75	88	241	243
ENSDARG00000010318	srpx	65	33	27	13	30	36	9	13	9	38	25	15
ENSDARG00000010331	si:ch211-26b3.2	210	109	103	60	103	111	43	55	61	46	110	117
ENSDARG00000010332	zgc:56231	17	2	8	7	6	4	13	0	3	0	7	1
ENSDARG00000010347	acer1	59	29	41	29	31	43	1	16	36	61	20	25
ENSDARG00000010350	c1ql3a	51	52	43	38	54	74	32	12	50	57	31	48
ENSDARG00000010376	slc5a3a	29	17	25	17	23	33	5	5	23	44	12	24
ENSDARG00000010381	rnf2	59	40	16	21	67	87	14	29	19	0	45	68
ENSDARG00000010384	lpar5a	52	39	36	38	58	63	41	29	42	62	71	91
ENSDARG00000010385	sept4a	108	46	38	29	72	106	43	38	35	63	88	52
ENSDARG00000010400	lrrfip2	356	159	121	75	140	178	69	110	152	27	215	176
ENSDARG00000010407	ppp4r4	67	38	38	28	86	61	7	11	19	44	28	32
ENSDARG00000010408	igsf9b	75	77	48	33	80	83	46	50	144	34	87	49
ENSDARG00000010411	epn1	581	351	244	150	267	356	190	272	183	247	421	332
ENSDARG00000010415	sirt4	119	84	53	34	59	105	57	80	70	20	101	108
ENSDARG00000010420	ndrg1b	30	16	47	19	42	48	43	70	58	19	36	82
ENSDARG00000010423	npsn	55	35	16	6	20	52	21	11	13	31	25	3
ENSDARG00000010432	eaf2	540	330	225	153	282	405	225	321	372	232	607	628
ENSDARG00000010434	clu	12	8	10	10	9	26	17	12	4	25	13	12
ENSDARG00000010437	tent5c	195	119	48	39	47	75	19	76	66	20	79	103
ENSDARG00000010442	rnf11a	188	87	46	53	80	127	50	49	96	51	140	122
ENSDARG00000010445	trabd	134	69	66	37	54	99	29	17	103	56	91	87
ENSDARG00000010454	guca1a	12	6	12	11	16	56	2	4	27	10	6	1
ENSDARG00000010472	atp1a2a	7	12	30	10	29	45	10	20	42	29	20	33
ENSDARG00000010478	hsp90aa1.1	49	45	63	39	64	54	48	52	34	12	87	59
ENSDARG00000010481	bzw1a	64	60	51	44	47	82	58	70	39	13	58	94
ENSDARG00000010482	prg4a	60	32	70	49	74	108	40	29	60	101	102	52
ENSDARG00000010487	sae1	27	25	25	15	20	31	89	12	32	21	22	34
ENSDARG00000010514	cxcr5	21	20	29	17	49	41	14	1	19	4	13	3
ENSDARG00000010515	dvl1a	184	97	100	91	171	164	97	193	208	125	202	275
ENSDARG00000010516	rpl21	116	61	62	46	66	76	61	55	54	25	127	98
ENSDARG00000010519	per3	958	560	420	187	339	552	380	502	338	225	679	688
ENSDARG00000010524	si:ch211-282j22.3	20	8	17	17	16	21	3	12	17	3	12	19
ENSDARG00000010531	scamp4	246	138	116	74	99	169	175	215	208	91	252	240
ENSDARG00000010553	mmgt1	114	61	63	49	78	108	38	40	89	70	79	95
ENSDARG00000010555	pdha1b	13	6	14	14	21	26	7	15	27	26	11	1
ENSDARG00000010556	mmp25b	13	3	4	9	5	16	0	3	10	0	7	5
ENSDARG00000010563	spoplb	160	91	112	91	161	208	68	139	107	65	208	247
ENSDARG00000010563	spopla	160	91	112	91	161	208	68	139	107	65	208	247
ENSDARG00000010571	ezh2	517	290	389	201	427	640	378	451	577	198	717	780
ENSDARG00000010572	slc25a25a	1328	765	568	395	733	951	634	781	792	260	1109	1319
ENSDARG00000010583	pard3ab	195	144	95	55	119	156	146	85	20	29	127	101
ENSDARG00000010586	tex9	60	44	25	14	26	22	16	10	20	23	27	22
ENSDARG00000010591	foxn4	226	143	76	73	97	115	77	104	125	61	91	154
ENSDARG00000010601	mtmr10	95	64	33	29	59	105	31	37	30	36	100	76
ENSDARG00000010602	zgc:112294	17	16	20	12	29	11	18	26	41	12	14	0
ENSDARG00000010603	kctd9b	43	26	32	24	37	60	29	16	27	5	55	59
ENSDARG00000010610	sarm1	119	77	71	46	86	105	91	47	111	66	63	81
ENSDARG00000010625	clic2	444	230	137	101	252	277	171	315	233	116	560	442
ENSDARG00000010630	hoxb6a	58	34	42	31	50	66	10	26	15	37	27	54
ENSDARG00000010641	slc20a1b	101	55	76	59	104	137	185	181	189	52	203	236
ENSDARG00000010655	ppm1k	232	166	203	115	180	207	113	175	260	84	247	224
ENSDARG00000010658	insig1	326	173	143	103	230	251	203	273	224	65	332	344
ENSDARG00000010662	fbxo36a	3	2	4	5	1	27	3	1	38	0	0	3
ENSDARG00000010673	trim16	389	224	127	90	130	150	68	90	163	97	187	190
ENSDARG00000010680	gngt2a	23	13	16	28	30	32	5	12	68	7	11	4
ENSDARG00000010681	tjap1	95	80	74	39	99	60	73	57	76	39	75	68
ENSDARG00000010700	il17d	70	47	48	27	53	39	28	1	45	76	20	24
ENSDARG00000010701	crygs4	19	17	31	14	30	23	20	23	56	67	41	59
ENSDARG00000010710	msi1	137	73	118	84	103	131	91	82	107	96	136	127
ENSDARG00000010712	npffr1l3	10	17	7	6	4	17	2	0	6	6	4	4
ENSDARG00000010717	chchd10	126	53	42	34	41	63	29	30	27	25	114	61
ENSDARG00000010721	2006-09-01	321	210	266	190	292	441	287	257	360	146	415	315
ENSDARG00000010727	ttyh2l	120	68	103	48	111	110	40	41	98	97	115	76
ENSDARG00000010738	zgc:101716	113	77	45	22	61	90	40	40	65	21	75	75
ENSDARG00000010745	dnaja2l	190	117	70	50	86	113	91	105	122	26	150	176
ENSDARG00000010752	acsl4b	235	124	128	79	197	219	217	170	250	93	463	489
ENSDARG00000010756	nod2	128	40	38	28	67	105	58	50	36	50	139	101
ENSDARG00000010758	capn12	33	19	35	13	45	38	4	16	32	22	34	19
ENSDARG00000010764	flj13639	121	69	50	39	62	70	16	47	67	34	53	91
ENSDARG00000010767	epha4l	232	122	88	64	91	106	72	68	43	41	132	105
ENSDARG00000010770	sox19a	27	21	12	15	14	29	2	8	12	9	10	12
ENSDARG00000010773	pnpla6	334	167	184	122	182	297	155	175	158	132	339	299
ENSDARG00000010779	tlk2	130	56	111	61	103	148	83	78	92	30	141	137
ENSDARG00000010782	zgc:55621	20	13	12	10	46	50	21	22	51	0	25	41
ENSDARG00000010784	ppp1r12a	681	313	322	149	327	502	326	415	404	204	565	600
ENSDARG00000010785	thbs1b	119	76	109	55	97	114	60	54	136	67	88	101
ENSDARG00000010789	homer3b	36	17	35	20	17	42	24	13	34	32	16	15
ENSDARG00000010791	dla	38	42	32	16	20	17	41	64	24	18	46	16
ENSDARG00000010792	cdc25b	1362	860	742	459	898	1154	823	1146	969	409	1487	1567
ENSDARG00000010794	tfeb	170	89	120	87	219	269	139	147	183	165	371	367
ENSDARG00000010816	slc7a14a	47	21	42	31	58	86	42	83	103	40	80	58
ENSDARG00000010823	memo1	1011	521	544	339	668	1029	494	728	738	262	1036	997
ENSDARG00000010831	churc1	48	33	26	29	25	57	44	16	35	20	36	41
ENSDARG00000010844	kras	520	362	333	211	307	548	377	504	484	239	790	665
ENSDARG00000010862	amt	64	40	40	23	55	75	48	25	64	73	82	50
ENSDARG00000010873	si:dkey-156n14.5	53	31	39	17	24	47	23	40	33	13	25	20
ENSDARG00000010878	cdkn1ca	307	151	191	97	135	201	110	178	142	90	225	233
ENSDARG00000010905	mettl13	604	306	368	217	437	594	487	453	433	262	731	784
ENSDARG00000010918	nprl3	40	9	18	13	26	22	18	29	4	18	46	43
ENSDARG00000010925		18	5	20	14	16	45	16	0	10	38	5	9
ENSDARG00000010933	cacna1fa	88	73	69	37	42	74	17	62	86	33	45	37
ENSDARG00000010934	syt14a	114	91	56	47	94	147	38	39	132	60	92	85
ENSDARG00000010936	abcb4	33	24	32	10	27	15	6	13	29	35	33	38
ENSDARG00000010940		3	6	39	5	13	14	27	1	0	0	6	1
ENSDARG00000010941	pomgnt2	265	127	129	118	206	273	152	235	284	116	340	358
ENSDARG00000010945	rapgef6	9	21	21	16	33	65	49	31	31	21	23	27
ENSDARG00000010946	cbsb	384	212	127	106	212	264	185	321	207	154	365	392
ENSDARG00000010948	kif11	457	298	168	123	232	336	192	279	276	81	390	469
ENSDARG00000010953	ndel1a	121	71	57	49	96	159	42	83	54	71	168	196
ENSDARG00000010956	sh3glb1b	140	79	96	69	136	185	61	75	138	52	146	98
ENSDARG00000010957	mpp2b	46	21	47	34	15	53	34	8	56	5	31	29
ENSDARG00000010958	glmnb	13	10	19	6	11	22	0	12	10	22	22	7
ENSDARG00000010962	fkbp7	64	35	37	39	26	47	6	25	5	13	32	24
ENSDARG00000010965	psma8	168	86	84	82	102	124	102	118	121	60	219	197
ENSDARG00000010977	rab34b	311	139	212	154	234	300	194	260	235	167	432	546
ENSDARG00000010978	trmt1	72	53	59	27	64	99	33	58	115	37	111	94
ENSDARG00000010981	zdhhc3a	70	46	22	26	42	71	43	27	62	53	102	31
ENSDARG00000011000	gtf2a1	739	409	495	325	585	801	470	703	744	313	1073	960
ENSDARG00000011020	hnrnpa1a	368	207	148	83	125	202	105	99	199	81	228	250
ENSDARG00000011023	pdlim3a	20	10	21	12	25	34	21	12	12	43	15	21
ENSDARG00000011026	zgc:92907	54	22	23	15	16	31	12	22	0	30	33	31
ENSDARG00000011027	fgfr1a	19	8	15	7	15	14	6	10	23	18	20	5
ENSDARG00000011042	pgbd5	73	38	46	31	45	118	40	63	63	30	47	23
ENSDARG00000011049	slc17a9b	25	15	26	31	29	59	15	21	28	32	17	14
ENSDARG00000011055	fbxo9	235	148	114	84	143	208	131	93	144	68	226	225
ENSDARG00000011065	camk2b1	511	266	154	95	216	277	114	168	226	159	227	207
ENSDARG00000011066	glra3	78	40	74	46	99	131	41	19	136	45	79	65
ENSDARG00000011072	ddx11	93	32	55	49	37	98	33	43	53	49	110	82
ENSDARG00000011076	zgc:91968	60	43	75	54	55	104	40	42	160	57	46	71
ENSDARG00000011079	wdr3	70	43	96	42	66	167	20	42	95	35	43	93
ENSDARG00000011083	si:dkey-42l23.2	14	5	20	8	26	50	33	25	10	16	55	40
ENSDARG00000011088	si:ch211-288d18.1	204	89	116	59	103	181	107	107	139	25	170	179
ENSDARG00000011091	drd2b	47	24	152	89	195	195	162	205	216	135	202	138
ENSDARG00000011094	ccna2	461	246	121	62	134	174	147	164	155	90	266	281
ENSDARG00000011113	chrna10a	34	15	61	34	105	98	23	26	73	59	37	53
ENSDARG00000011125	snrpb	32	16	39	20	36	47	27	11	45	28	31	49
ENSDARG00000011141	dpysl5a	203	128	178	98	251	335	235	269	412	242	376	250
ENSDARG00000011146	uqcrb	5	6	5	0	18	13	7	3	0	0	5	3
ENSDARG00000011152	rpp14	72	38	45	14	31	60	20	31	29	0	51	41
ENSDARG00000011157	arhgef18a	123	50	17	12	29	34	23	15	32	20	49	35
ENSDARG00000011163	sema3fa	29	25	61	22	38	31	15	11	35	15	29	23
ENSDARG00000011166	cahz	294	140	64	23	58	72	52	69	71	61	69	58
ENSDARG00000011170	ndrg2	65	34	33	18	54	61	53	36	81	20	73	66
ENSDARG00000011171	si:ch211-12m10.1	55	33	60	30	55	78	44	43	80	75	44	38
ENSDARG00000011188	acvr2aa	15	15	23	12	22	40	13	27	38	5	43	59
ENSDARG00000011201	rplp2l	387	236	152	90	136	186	161	192	313	89	344	423
ENSDARG00000011219	akt2	143	98	85	43	105	167	57	67	90	100	120	114
ENSDARG00000011222	ccdc28b	71	41	69	33	106	166	162	159	174	58	159	109
ENSDARG00000011233	pcyt1aa	127	77	84	56	69	70	86	97	100	32	128	121
ENSDARG00000011235	otx2b	95	40	50	39	60	57	27	41	63	53	88	43
ENSDARG00000011239	ppp1r14aa	78	26	52	14	36	49	5	14	80	97	28	16
ENSDARG00000011240	ift46	63	38	56	53	101	142	63	102	118	58	316	378
ENSDARG00000011245	esrp1	28	7	30	12	29	20	13	5	14	0	26	5
ENSDARG00000011246	krr1	116	57	30	20	65	85	40	50	70	45	74	91
ENSDARG00000011247	rnpc3	24	33	16	12	34	35	16	26	48	23	33	22
ENSDARG00000011257	enpp2	82	45	41	27	36	56	23	20	18	4	32	41
ENSDARG00000011259	trpm1a	11	10	18	9	29	28	0	0	8	0	2	0
ENSDARG00000011262	traip	29	30	19	18	25	31	19	9	20	5	54	17
ENSDARG00000011273	tlx2	43	21	14	8	13	18	8	2	7	7	23	9
ENSDARG00000011298	atf7a	471	220	209	140	293	409	252	302	171	152	415	410
ENSDARG00000011299	blzf1	8	7	11	5	9	11	9	18	22	0	4	17
ENSDARG00000011301	nae1	250	149	100	77	89	153	93	104	178	53	207	176
ENSDARG00000011312	stk3	54	37	37	6	36	39	25	18	64	30	35	78
ENSDARG00000011317	adra1ba	82	51	66	51	46	48	23	49	30	16	55	35
ENSDARG00000011326	ankrd45	13	10	47	28	58	79	59	62	59	35	106	94
ENSDARG00000011333	arhgap33	180	77	79	55	117	165	148	104	123	90	196	139
ENSDARG00000011334	ncaldb	77	47	47	22	49	48	33	33	61	54	62	40
ENSDARG00000011360	nfatc2ip	39	10	15	7	23	19	6	7	7	4	24	28
ENSDARG00000011370	fyna	207	123	107	98	126	190	150	140	134	65	190	136
ENSDARG00000011371	zgc:64106	30	28	32	7	28	40	8	9	27	2	42	48
ENSDARG00000011373	mknk2a	223	92	96	83	148	190	153	171	156	99	222	273
ENSDARG00000011376	dnase1l4.2	348	201	29	21	36	67	41	3	15	80	51	62
ENSDARG00000011400	tnnc1a	26	18	27	29	23	49	13	19	1	8	36	19
ENSDARG00000011404	fen1	194	117	123	85	169	244	109	116	157	59	217	268
ENSDARG00000011405	rps9	446	254	145	123	260	344	206	299	150	152	374	336
ENSDARG00000011407	col2a1b	148	62	78	45	56	132	47	49	63	59	107	83
ENSDARG00000011410	aadat	217	91	63	40	79	110	63	107	110	118	135	164
ENSDARG00000011418	sigmar1	17	5	22	13	16	35	2	5	9	49	5	10
ENSDARG00000011422	ryr1a	28	18	32	12	18	30	2	4	45	26	17	33
ENSDARG00000011445	elmsan1a	136	73	112	86	110	172	55	74	150	48	222	215
ENSDARG00000011449	fes	77	45	73	37	56	120	59	72	85	32	122	158
ENSDARG00000011459	gsna	11	9	8	11	18	18	6	5	44	8	30	48
ENSDARG00000011462	otub1b	59	41	32	12	30	64	15	34	20	5	60	31
ENSDARG00000011463		1	2	1	1	9	18	0	6	0	0	3	4
ENSDARG00000011466	afg1la	7	3	1	5	17	24	0	2	5	0	6	12
ENSDARG00000011473	calcrla	288	149	95	54	103	96	65	71	87	61	154	182
ENSDARG00000011487	gnaq	44	29	45	16	39	42	41	40	65	27	26	30
ENSDARG00000011488	sirt2	70	55	73	29	69	64	25	94	82	46	110	149
ENSDARG00000011490	scube3	22	20	11	11	13	4	7	27	21	11	11	13
ENSDARG00000011493	dcun1d3	21	10	36	22	31	25	9	20	29	30	18	16
ENSDARG00000011496	ppm1bb	528	310	202	124	301	402	280	275	331	135	539	619
ENSDARG00000011498	si:ch211-212o1.2	99	48	27	27	35	63	29	33	29	21	45	60
ENSDARG00000011506	lpcat1	136	105	85	43	99	113	49	149	120	127	178	167
ENSDARG00000011510	rcc2	118	84	82	66	119	142	103	61	142	48	114	88
ENSDARG00000011515	orai1a	33	15	30	21	23	27	11	17	23	41	12	13
ENSDARG00000011519	myl4	1	2	2	1	13	7	0	0	7	21	3	0
ENSDARG00000011521	upb1	89	65	33	24	19	51	10	47	40	24	39	24
ENSDARG00000011533	sema6dl	114	61	88	38	96	92	82	85	106	39	66	95
ENSDARG00000011537	ugt2a5	90	61	45	33	52	49	25	55	59	44	78	86
ENSDARG00000011545	arrb2b	201	101	90	51	141	164	79	165	159	67	188	248
ENSDARG00000011549	c1ql4a	47	33	41	11	26	28	4	6	39	28	21	17
ENSDARG00000011553	atp5pb	131	75	51	31	70	78	15	34	73	33	89	91
ENSDARG00000011555	spag7	225	134	103	89	97	168	76	65	170	82	217	238
ENSDARG00000011564	sfpq	46	27	31	17	20	49	3	11	41	13	30	32
ENSDARG00000011570	pou6f1	149	93	73	38	68	96	44	92	89	15	113	77
ENSDARG00000011571	calcrlb	166	85	64	53	73	95	30	34	40	46	52	72
ENSDARG00000011573	abcb11a	3	4	7	8	11	20	9	0	15	4	7	21
ENSDARG00000011579	hoxb10a	72	30	18	29	30	47	30	27	40	12	45	21
ENSDARG00000011581	si:dkey-23k10.5	36	17	24	23	41	41	16	11	11	55	31	24
ENSDARG00000011582	sox5	60	42	46	26	60	77	60	50	109	8	51	58
ENSDARG00000011583	cry1ab	287	162	117	90	161	228	64	79	154	126	209	182
ENSDARG00000011594	smarcb1b	219	140	124	73	155	183	95	104	99	37	161	162
ENSDARG00000011597	atxn2l	875	578	445	342	782	877	626	765	679	300	1124	927
ENSDARG00000011600	epha4b	73	60	66	38	72	110	68	49	64	23	88	67
ENSDARG00000011602	si:dkeyp-117h8.2	15	22	27	26	32	43	3	14	48	0	55	34
ENSDARG00000011605	dennd6b	38	33	24	19	25	36	7	16	29	7	33	26
ENSDARG00000011609	si:ch211-262e15.1	1045	643	472	297	600	814	514	703	704	323	1018	989
ENSDARG00000011611	actr1	324	180	126	87	168	174	153	156	201	71	239	272
ENSDARG00000011613	rbm39a	20	9	10	10	12	12	13	4	10	0	19	3
ENSDARG00000011615	mybpc3	121	87	119	71	139	171	44	30	75	87	69	117
ENSDARG00000011618	slc26a2	56	40	79	37	75	76	64	68	84	33	137	100
ENSDARG00000011635	scxb	29	14	16	15	27	35	23	0	8	41	19	9
ENSDARG00000011640	syt5b	27	14	26	12	21	52	26	15	34	30	18	15
ENSDARG00000011648	snrpd1	101	53	28	21	42	64	30	54	67	12	99	96
ENSDARG00000011652	si:zfos-979f1.2	29	14	20	7	18	9	8	8	12	41	18	11
ENSDARG00000011652	ftr52p	29	14	20	7	18	9	8	8	12	41	18	11
ENSDARG00000011661	twf1b	8	16	14	11	44	53	12	0	11	12	4	13
ENSDARG00000011662	chuk	158	76	79	53	76	92	56	87	86	38	121	144
ENSDARG00000011672	sema3b	41	14	17	24	22	28	14	18	26	0	8	28
ENSDARG00000011673	si:ch211-246m6.5	23	17	22	7	37	50	7	0	7	14	9	15
ENSDARG00000011683	prtfdc1	125	82	137	80	104	150	95	78	174	83	109	132
ENSDARG00000011693	ttc36	22	18	16	8	21	45	3	16	3	13	50	32
ENSDARG00000011696	esrrgb	217	98	35	30	64	59	33	70	85	6	85	86
ENSDARG00000011701	ctsll	29	25	22	16	48	59	7	14	38	11	28	4
ENSDARG00000011703	clocka	333	175	188	119	221	328	235	228	264	239	318	362
ENSDARG00000011723	zgc:56556	102	84	69	48	96	138	50	44	87	57	151	123
ENSDARG00000011724	marveld1	159	104	165	90	184	300	166	196	312	121	302	237
ENSDARG00000011727	b9d1	110	68	62	48	113	79	69	73	91	45	150	159
ENSDARG00000011740	u2af2b	190	97	110	70	109	131	83	107	75	33	181	146
ENSDARG00000011743	pigo	164	68	75	50	80	171	98	76	158	123	152	159
ENSDARG00000011764	ints13	20	11	8	11	2	10	7	7	5	0	25	24
ENSDARG00000011769	cpm	33	16	28	7	40	36	0	8	34	24	14	10
ENSDARG00000011770	dhrs12	244	169	121	79	190	252	158	216	258	135	347	335
ENSDARG00000011777	cttn	20	6	19	11	23	32	23	11	20	38	12	18
ENSDARG00000011783	stag2a	52	12	15	15	18	30	7	11	32	21	19	26
ENSDARG00000011797	tent5bb	190	91	81	92	92	159	64	97	146	39	146	228
ENSDARG00000011801	wars2	53	19	50	29	75	71	21	24	70	56	81	67
ENSDARG00000011809	mical1	61	34	24	15	17	22	11	7	19	11	28	24
ENSDARG00000011818	batf	53	39	42	27	57	42	52	17	32	50	56	61
ENSDARG00000011819	pcnx1	43	13	24	24	23	79	13	14	21	23	58	39
ENSDARG00000011821	plod2	96	55	45	17	36	44	2	19	45	22	41	31
ENSDARG00000011824	pbxip1b	166	107	85	35	67	89	43	93	106	24	135	161
ENSDARG00000011825	cetn3	1005	527	321	224	302	552	330	383	530	83	645	769
ENSDARG00000011837	zgc:100846	129	60	69	51	129	125	80	93	90	41	181	119
ENSDARG00000011841	atp5l	230	117	110	79	102	139	30	65	102	68	105	131
ENSDARG00000011845	chn2	125	57	154	94	199	220	191	214	206	118	343	290
ENSDARG00000011851	map2k5	28	12	9	6	16	12	31	7	6	4	4	7
ENSDARG00000011855	aak1a	113	64	51	35	45	80	46	30	27	53	112	109
ENSDARG00000011862	inaa	85	51	66	24	57	83	19	16	18	51	70	36
ENSDARG00000011863	ptk7a	217	122	100	74	117	208	71	121	191	88	203	131
ENSDARG00000011870	sp8a	149	97	59	28	27	55	55	32	32	11	67	71
ENSDARG00000011876	ednraa	28	19	19	10	11	19	2	0	14	19	3	2
ENSDARG00000011879	foxn1	5	5	5	8	10	3	1	0	17	12	2	4
ENSDARG00000011885	mrpl19	171	100	59	43	48	119	75	120	150	36	199	179
ENSDARG00000011886	pdca	5	0	7	0	2	14	0	0	6	0	8	9
ENSDARG00000011890	cry4	642	352	307	166	352	468	244	379	390	190	490	552
ENSDARG00000011897	tsg101b	12	9	16	9	11	2	4	7	4	21	8	13
ENSDARG00000011909	itpr2	97	56	43	28	67	68	22	85	43	51	104	134
ENSDARG00000011925	spns1	13	11	9	7	21	26	30	14	6	1	17	19
ENSDARG00000011926	tpgs2	640	359	384	229	404	596	412	447	544	196	769	881
ENSDARG00000011929	plp1b	27	24	27	18	25	37	1	2	12	21	14	10
ENSDARG00000011932	prkcbp1l	802	456	250	182	426	556	286	337	497	240	640	582
ENSDARG00000011934	gyg1a	71	50	50	21	42	80	30	44	32	25	43	31
ENSDARG00000011941	bmpr2a	129	88	105	54	85	98	56	80	90	97	129	73
ENSDARG00000011945	slc35e1	28	21	17	23	23	43	12	6	10	5	37	37
ENSDARG00000011948	insra	226	117	74	60	142	138	78	57	93	39	180	101
ENSDARG00000011956	dlx4a	42	37	33	19	18	28	11	6	35	21	22	36
ENSDARG00000011958	ctnnbl1	160	130	83	56	102	79	66	81	95	60	148	152
ENSDARG00000011961	csrp2	12	12	18	10	25	35	6	20	10	45	18	14
ENSDARG00000011975	fmn1	24	36	16	13	18	31	9	1	58	6	25	26
ENSDARG00000011983	zgc:136908	9	12	30	23	23	50	60	32	62	13	41	31
ENSDARG00000011989	crx	65	45	34	17	36	46	16	3	63	68	36	19
ENSDARG00000011998	bfsp2	55	23	33	20	31	64	12	0	14	36	9	17
ENSDARG00000011999	ybey	29	17	11	14	4	13	22	3	28	7	25	15
ENSDARG00000012002	slc38a7	148	120	88	51	70	109	92	144	65	68	217	168
ENSDARG00000012005	mob2b	1058	604	374	241	400	434	228	427	515	219	700	733
ENSDARG00000012013	cpa6	41	37	32	20	17	47	31	22	25	17	37	21
ENSDARG00000012016	hpgd	54	30	65	34	55	106	23	5	43	26	53	35
ENSDARG00000012019	glra1	71	45	80	46	86	123	81	61	26	27	99	63
ENSDARG00000012021	kdsr	128	63	115	72	131	154	91	102	176	63	165	198
ENSDARG00000012025	hs6st2	87	62	72	43	82	170	53	24	68	70	62	82
ENSDARG00000012030	dnaaf1	74	26	44	21	38	40	15	12	10	15	34	37
ENSDARG00000012035	zgc:100832	7	9	20	4	9	25	3	0	20	1	23	22
ENSDARG00000012039	ttc26	118	42	73	51	93	107	57	70	88	65	96	97
ENSDARG00000012040	rnf19a	220	105	98	80	140	273	112	170	158	98	218	258
ENSDARG00000012044	polr3gla	50	40	50	34	65	128	56	51	104	13	106	94
ENSDARG00000012051	mettl21a	83	37	62	17	35	77	28	31	21	28	50	81
ENSDARG00000012057	mtnr1al	24	29	21	11	12	29	2	14	5	65	1	3
ENSDARG00000012060	thbs3b	134	62	38	35	31	50	14	12	43	30	45	36
ENSDARG00000012066	dcn	13	12	15	7	15	16	0	5	7	15	2	6
ENSDARG00000012072	atp5s	20	10	9	9	11	33	14	8	22	23	13	9
ENSDARG00000012073	kif15	56	39	18	37	35	80	10	14	55	1	31	28
ENSDARG00000012076	apoa1a	45	17	21	23	63	41	28	8	54	31	39	21
ENSDARG00000012078	meis1b	348	167	189	123	227	286	233	251	428	129	304	387
ENSDARG00000012113	c19h1orf109	888	521	377	205	403	461	407	553	459	169	653	636
ENSDARG00000012126	zgc:109965	21	16	11	12	24	14	4	6	36	26	12	22
ENSDARG00000012135	fbxl2	234	125	120	79	107	114	37	93	110	111	145	120
ENSDARG00000012138	sgce	69	62	63	33	60	100	34	55	48	19	80	36
ENSDARG00000012140	ccnl1b	197	143	92	64	133	173	90	146	99	126	164	116
ENSDARG00000012141	papolg	69	42	63	27	47	57	41	15	47	17	50	33
ENSDARG00000012144	emc7	243	143	136	82	146	192	161	133	122	145	242	357
ENSDARG00000012177	rab4b	12	15	0	3	13	8	9	7	1	6	7	1
ENSDARG00000012184	zgc:162872	101	60	75	39	43	79	35	33	51	13	128	110
ENSDARG00000012192	cant1a	2	9	18	1	5	18	6	0	14	7	15	19
ENSDARG00000012194	scp2a	86	63	84	54	67	109	51	56	81	77	141	138
ENSDARG00000012196	fer	164	115	121	61	110	163	131	89	104	53	155	189
ENSDARG00000012199	gpt2	823	505	290	198	413	524	353	653	472	202	763	730
ENSDARG00000012204	si:dkey-166c18.1	9	9	25	10	4	20	1	2	16	16	1	9
ENSDARG00000012215	umps	25	15	30	32	38	45	20	38	22	0	34	48
ENSDARG00000012219	dpf2	220	144	182	116	258	324	254	255	288	170	277	313
ENSDARG00000012222	nup35	131	70	54	65	69	89	67	56	67	60	114	104
ENSDARG00000012234	psme3	63	38	25	21	16	59	45	36	36	25	76	65
ENSDARG00000012244	ube2e3	465	213	207	170	285	311	161	241	183	192	392	310
ENSDARG00000012247	def6a	53	32	38	38	84	110	58	98	88	65	74	98
ENSDARG00000012248	rgma	252	146	78	102	154	185	84	123	108	71	134	153
ENSDARG00000012269	clcn1b	2	1	13	4	4	20	4	0	9	5	6	2
ENSDARG00000012271	tmem206	370	188	244	146	267	353	157	222	253	204	341	396
ENSDARG00000012275	katnal2	39	33	47	13	39	101	28	50	39	25	55	84
ENSDARG00000012281	zgc:65851	123	66	75	50	96	55	23	14	81	83	39	37
ENSDARG00000012295	bcs1l	13	7	15	10	16	23	3	10	33	0	13	9
ENSDARG00000012311	myoz2a	4	3	8	9	8	26	0	3	20	30	9	5
ENSDARG00000012314	usp25	411	234	179	89	235	281	176	275	306	113	407	387
ENSDARG00000012340	ptpn11b	133	77	61	34	78	143	57	85	45	73	84	95
ENSDARG00000012341	capn9	16	19	28	12	16	36	16	11	2	20	32	2
ENSDARG00000012347	nacad	12	13	12	11	17	42	0	0	19	0	8	16
ENSDARG00000012353	vipr2	18	12	13	5	7	16	7	0	16	17	18	9
ENSDARG00000012366	fbp2	47	46	72	29	75	70	31	47	85	59	38	42
ENSDARG00000012367	trim46a	13	10	6	3	11	9	17	17	38	16	11	4
ENSDARG00000012368	ttc21b	46	39	23	32	39	52	22	74	107	26	33	61
ENSDARG00000012369	rdh10b	85	41	29	15	34	72	17	26	53	12	24	33
ENSDARG00000012378	naa35	86	47	52	16	33	41	11	19	59	12	81	70
ENSDARG00000012381	hsc70	37	5	10	1	9	12	7	4	15	15	10	17
ENSDARG00000012387	pdha1a	116	62	39	36	54	73	47	76	36	37	81	83
ENSDARG00000012388	cox4i1l	244	129	70	37	63	103	15	35	57	71	131	166
ENSDARG00000012389	adar	228	147	133	85	146	221	101	157	159	28	254	237
ENSDARG00000012390	kcnk5b	128	85	45	42	51	49	48	102	74	31	144	156
ENSDARG00000012395	mmp13a	30	35	28	9	29	28	10	12	6	15	29	13
ENSDARG00000012397	eya4	136	95	123	84	155	113	41	73	43	105	75	105
ENSDARG00000012399	adssl	131	76	75	55	90	85	55	98	39	51	119	119
ENSDARG00000012403	ercc6l2	43	25	29	27	34	66	18	19	57	38	33	57
ENSDARG00000012405	col1a1a	92	75	93	68	142	140	47	61	98	74	62	68
ENSDARG00000012407	mgat1a	170	102	66	50	66	99	65	102	93	40	95	125
ENSDARG00000012409	rnf207b	37	27	28	21	55	53	18	37	34	18	31	26
ENSDARG00000012422	col11a2	81	64	53	35	59	73	11	26	41	23	54	41
ENSDARG00000012426	neflb	73	68	106	48	113	202	83	72	121	149	102	108
ENSDARG00000012432	fam76b	393	219	245	156	329	498	335	373	392	123	513	515
ENSDARG00000012446	zgc:113057	33	33	65	35	49	63	5	12	50	3	11	17
ENSDARG00000012449	si:ch211-169p10.1	493	202	220	140	247	313	239	254	160	128	370	348
ENSDARG00000012450	vmp1	132	78	73	60	164	130	125	134	105	52	199	213
ENSDARG00000012453	rnls	48	29	24	31	44	65	28	75	88	30	63	50
ENSDARG00000012458	zgc:77849	1227	711	594	373	805	1106	765	917	969	360	1536	1610
ENSDARG00000012460	rassf4	250	131	59	49	100	138	73	134	150	86	172	195
ENSDARG00000012467	spint1b	73	39	37	17	44	56	9	16	48	32	44	52
ENSDARG00000012468	aacs	1376	689	433	322	558	872	536	609	662	335	909	834
ENSDARG00000012485	aurka	590	372	212	178	318	407	390	383	388	212	577	568
ENSDARG00000012495	mphosph10	57	28	21	23	37	70	16	21	41	26	31	51
ENSDARG00000012496	si:ch211-213o11.11	19	20	50	26	47	92	13	26	19	22	30	47
ENSDARG00000012499	per1b	1489	817	603	357	878	1347	827	1272	860	390	1498	1535
ENSDARG00000012504	rlbp1a	19	17	15	19	41	35	33	43	20	56	17	15
ENSDARG00000012505	u2af2a	38	24	7	14	44	33	21	16	37	14	48	39
ENSDARG00000012506	rnpep	362	206	160	115	230	350	244	287	296	115	432	398
ENSDARG00000012513	sdcbp2	190	107	152	116	173	173	139	208	199	96	438	399
ENSDARG00000012519	hcfc1b	167	72	63	40	72	102	29	52	33	22	91	116
ENSDARG00000012534	slc6a6a	108	53	59	20	46	61	22	53	28	53	37	69
ENSDARG00000012539	dnase1	29	13	23	2	11	30	13	4	2	30	18	11
ENSDARG00000012553	rap1aa	258	136	112	54	90	119	82	105	172	57	197	143
ENSDARG00000012555	ak5	23	17	5	7	26	17	1	14	23	16	21	9
ENSDARG00000012563	pdss2	39	22	26	14	25	14	10	2	3	6	22	17
ENSDARG00000012572	polr3f	87	34	67	47	69	82	51	36	115	22	93	110
ENSDARG00000012574	slkb	88	42	31	18	58	46	59	56	70	36	86	99
ENSDARG00000012577	waca	579	317	229	150	379	488	243	308	340	101	622	612
ENSDARG00000012581		58	31	30	13	32	51	7	9	52	37	32	34
ENSDARG00000012586	fmnl2a	490	222	272	180	266	418	284	259	298	160	538	522
ENSDARG00000012591	pdcd10b	56	32	28	20	30	42	9	30	9	5	38	44
ENSDARG00000012600	si:dkey-97a13.6	62	23	46	19	76	97	48	29	54	44	46	96
ENSDARG00000012609	hpx	84	52	79	51	71	104	21	26	99	64	60	49
ENSDARG00000012610	saga	9	23	27	16	33	62	9	29	80	17	26	50
ENSDARG00000012625	prkag2a	225	110	122	70	112	191	86	77	120	67	172	102
ENSDARG00000012627	cdc34b	251	153	217	135	244	292	146	186	245	78	350	381
ENSDARG00000012632	zgc:92749	317	132	94	59	100	108	68	90	103	58	147	144
ENSDARG00000012642	si:ch211-266d19.4	57	35	34	17	38	35	26	35	57	24	42	61
ENSDARG00000012649	gb:cr929477	134	67	53	37	47	71	35	29	77	44	70	81
ENSDARG00000012656	atf6	226	110	71	52	145	135	79	77	99	71	160	148
ENSDARG00000012667	tfap2b	167	127	113	56	89	116	31	53	83	70	65	122
ENSDARG00000012671	inhbaa	73	48	72	53	125	150	60	120	171	97	294	365
ENSDARG00000012672	gtf2e2	60	31	37	19	36	55	25	64	28	13	69	78
ENSDARG00000012674	rpusd4	71	38	41	21	45	51	45	49	73	23	80	112
ENSDARG00000012682	pfn2l	172	89	134	53	184	239	122	142	148	97	256	232
ENSDARG00000012684	atp2b1a	602	311	214	144	341	464	368	338	263	110	511	547
ENSDARG00000012688	eif1b	323	195	182	122	184	307	214	129	253	165	321	342
ENSDARG00000012699	bbx	133	69	78	60	64	73	36	33	31	94	68	52
ENSDARG00000012718	wee2	16	7	12	5	9	20	0	8	5	2	11	9
ENSDARG00000012723	rbm14a	114	76	53	37	85	104	24	102	116	41	139	116
ENSDARG00000012726	calhm5.2	16	7	6	1	1	6	9	7	8	10	1	5
ENSDARG00000012729	hcls1	75	43	39	15	49	54	50	69	77	17	77	109
ENSDARG00000012747	rer1	521	346	408	302	523	663	510	713	643	215	992	1074
ENSDARG00000012763	arl13b	515	245	111	100	158	222	129	163	280	159	375	282
ENSDARG00000012776	smarca1	410	244	266	178	292	403	295	265	257	260	516	416
ENSDARG00000012777	nucks1b	83	60	81	28	88	80	26	26	65	30	93	33
ENSDARG00000012788	foxa3	116	91	67	38	82	105	42	65	79	119	53	66
[truncated: 19,158 more rows]
