# Supplementary material for: Dynamics of cardiomyocyte transcriptome and chromatin landscape demarcates key events of heart development
Source: HighWire-hosted journal article supplement (doi:10.1101/gr.244491.118), 2019-02-13
Supplement: Supplement_Table_15.xlsx [file Supplement_Table_15.xlsx]

## Sheet: peak_table
Supplement Table 15. Differentially accessible ATAC-seq peaks at different stages of heart development. Numbers in columns are log2FC and padj corresponding to compared conditions as indicated in table headers. Genomic coordinates of the peaks are indicated in "Chromosome" and "start"/"end" columns.
peak_name	Chromosome	start	end	ATACseq_24-48_log2FC	ATACseq_24-48_padj	ATACseq_48-72_log2FC	ATACseq_48-72_padj
master_peak_7	1	10025	10114	-1.9916	NA	1.0402	0.999991
master_peak_9	1	11048	11165	0.868436	0.596953	-0.541623	0.999991
master_peak_10	1	11325	11424	-0.48966	NA	0.206031	0.999991
master_peak_11	1	11626	11716	-0.92902	NA	0.178994	0.999991
master_peak_12	1	11935	12049	0.378297	0.84281	-0.190058	0.999991
master_peak_25	1	21752	21792	1.39829	0.511594	1.11547	0.999991
master_peak_26	1	22376	22462	-1.05098	0.562053	-0.328732	0.999991
master_peak_29	1	29836	29948	-2.4686	NA	0.852551	0.999991
master_peak_37	1	42521	42653	-1.36617	NA	0.716872	0.999991
master_peak_38	1	42756	42801	-1.1584	NA	-1.39048	0.999991
master_peak_39	1	44087	44196	0.170952	0.945686	-0.773657	0.999991
master_peak_40	1	44322	44441	-0.121188	NA	0.187611	0.999991
master_peak_41	1	44515	44694	-0.940184	0.28059	0.595767	0.999991
master_peak_45	1	50676	50758	2.10348	NA	0.511428	0.999991
master_peak_46	1	54615	54712	0.0309744	NA	0.295755	0.999991
master_peak_47	1	55482	55693	0.254911	NA	-0.283146	0.999991
master_peak_50	1	59538	59637	-1.48095	NA	1.06773	0.999991
master_peak_51	1	60523	60662	-1.69958	0.191059	-0.0979846	0.999991
master_peak_56	1	64883	64949	-0.0575508	NA	0.383613	0.999991
master_peak_57	1	65084	65241	-0.397174	0.865774	0.710428	0.999991
master_peak_58	1	65421	65510	-0.59473	NA	2.46671	0.999991
master_peak_59	1	68528	68698	-1.48896	NA	0.558964	0.999991
master_peak_60	1	71483	71602	-0.537611	NA	0.850547	0.999991
master_peak_62	1	72620	72673	-0.550025	NA	1.09094	0.999991
master_peak_63	1	73708	73829	-0.172001	0.940665	0.126886	0.999991
master_peak_64	1	74159	74204	0.858294	NA	-0.268869	0.999991
master_peak_69	1	79337	79397	0.556778	NA	1.06178	0.999991
master_peak_70	1	79433	79670	1.87634	0.208841	0.0141527	0.999991
master_peak_72	1	84742	84835	-0.758358	NA	0.207994	0.999991
master_peak_74	1	85896	86043	1.18445	NA	-1.07545	0.999991
master_peak_75	1	86090	86170	-0.388418	NA	1.12658	0.999991
master_peak_77	1	86478	86545	0.759429	NA	-0.55524	0.999991
master_peak_80	1	88904	88967	2.17883	NA	0.343872	0.999991
master_peak_82	1	90397	90429	1.61488	NA	-2.28978	0.999991
master_peak_86	1	92625	92753	1.77727	NA	-0.888793	0.999991
master_peak_87	1	93336	93475	-0.749327	0.626524	0.952798	0.999991
master_peak_89	1	96106	96181	1.63251	NA	1.25005	0.999991
master_peak_94	1	99597	99934	1.15403	0.23182	0.296662	0.999991
master_peak_102	1	110669	110729	-3.04703	NA	1.8877	0.999991
master_peak_104	1	112285	112408	-0.0369655	NA	-0.34326	0.999991
master_peak_106	1	114969	115020	-1.05127	NA	1.03551	0.999991
master_peak_109	1	117231	117480	-0.290204	0.914585	0.454095	0.999991
master_peak_111	1	119781	119936	-0.193283	NA	0.647289	0.999991
master_peak_112	1	120128	120340	-1.05859	NA	1.53425	0.999991
master_peak_115	1	124258	124315	0.695674	NA	0.336222	0.999991
master_peak_116	1	124517	124633	-1.11725	NA	0.112608	0.999991
master_peak_120	1	139597	139737	-0.691428	NA	0.84195	0.999991
master_peak_122	1	144109	144383	-1.10885	0.109908	-0.0230883	0.999991
master_peak_123	1	144901	145015	0.0434951	NA	0.316969	0.999991
master_peak_128	1	150900	150989	-1.08805	NA	0.490996	0.999991
master_peak_132	1	155884	155926	-0.520021	NA	0.923603	0.999991
master_peak_133	1	157494	157611	-0.525439	0.730536	0.0837289	0.999991
master_peak_134	1	157695	157923	-0.867675	0.575944	1.01135	0.999991
master_peak_136	1	161367	161409	1.62747	NA	0.673019	0.999991
master_peak_137	1	162216	162330	-0.694371	NA	-2.03413	0.999991
master_peak_138	1	162562	162665	-0.851519	NA	1.11489	0.999991
master_peak_149	1	175028	175107	0.686564	NA	-0.299734	0.999991
master_peak_150	1	178339	178468	-0.112014	NA	-0.998868	0.999991
master_peak_154	1	184122	184206	-0.864275	NA	0.732485	0.999991
master_peak_156	1	184560	184711	-1.54508	NA	0.554228	0.999991
master_peak_161	1	196773	197038	-1.61861	0.00241659	0.230836	0.999991
master_peak_162	1	197427	197543	0.563259	0.783666	0.194476	0.999991
master_peak_165	1	202586	202626	-5.20766	NA	4.42808	0.999991
master_peak_166	1	204290	204361	0.925208	NA	-0.392893	0.999991
master_peak_168	1	206001	206071	0.943665	NA	-0.0789228	0.999991
master_peak_169	1	207552	207628	-0.545137	NA	-0.28243	0.999991
master_peak_170	1	207833	207949	-0.128086	NA	-0.433849	0.999991
master_peak_178	1	218832	219222	-0.216385	0.676067	0.0945686	0.999991
master_peak_180	1	220227	220312	-0.3812	NA	0.739418	0.999991
master_peak_181	1	222175	222299	-0.800847	0.678928	0.33384	0.999991
master_peak_184	1	226542	226623	-0.169068	NA	0.532155	0.999991
master_peak_186	1	231989	232159	-0.590876	0.6719	0.339304	0.999991
master_peak_189	1	237658	237719	1.0357	NA	1.40063	0.999991
master_peak_190	1	238384	238563	-1.11628	0.507077	0.229384	0.999991
master_peak_192	1	240130	240230	0.241046	NA	0.771541	0.999991
master_peak_196	1	246905	247123	-1.94499	0.195781	-0.825954	0.999991
master_peak_199	1	250626	250711	1.19265	NA	-0.392487	0.999991
master_peak_200	1	252997	253116	-0.754943	NA	0.263495	0.999991
master_peak_203	1	256856	257008	-1.00472	0.540702	-0.220482	0.999991
master_peak_208	1	272793	272858	0.89564	NA	-0.101386	0.999991
master_peak_210	1	280281	280324	1.80824	NA	0.188715	0.999991
master_peak_217	1	291199	291282	-0.932293	NA	2.03071	0.999991
master_peak_221	1	298852	298953	0.0862355	NA	-0.40049	0.999991
master_peak_222	1	300393	300540	0.161655	NA	-0.200239	0.999991
master_peak_223	1	300766	300846	3.43718	NA	-0.396511	0.999991
master_peak_226	1	303680	303737	0.623332	NA	-0.147826	0.999991
master_peak_230	1	310939	311108	0.332015	NA	-0.5296	0.999991
master_peak_233	1	314922	315330	-0.923775	0.439099	-0.408374	0.999991
master_peak_234	1	315509	315573	0.276427	NA	-0.168986	0.999991
master_peak_236	1	320846	320976	0.390284	NA	-0.391753	0.999991
master_peak_238	1	323488	323578	0.559499	NA	-0.0595392	0.999991
master_peak_242	1	325997	326099	-1.04706	NA	-1.1738	0.999991
master_peak_243	1	328277	328361	0.0680109	NA	-0.813934	0.999991
master_peak_244	1	328643	328750	-0.719265	NA	0.229049	0.999991
master_peak_245	1	328802	328894	-0.865636	NA	2.04914	0.999991
master_peak_250	1	334229	334315	-0.43406	NA	0.389532	0.999991
master_peak_252	1	339330	339553	-0.189996	0.947376	-0.175332	0.999991
master_peak_253	1	340942	341121	0.225034	0.917424	-0.457312	0.999991
master_peak_257	1	345864	345905	-0.37366	NA	-0.223443	0.999991
master_peak_259	1	348494	348658	0.0292024	NA	0.57329	0.999991
master_peak_261	1	349336	349421	1.42283	NA	-0.566754	0.999991
master_peak_263	1	350875	350947	1.117	NA	-1.72434	0.999991
master_peak_265	1	355076	355163	-0.441754	NA	1.29524	0.999991
master_peak_267	1	357155	357225	-1.87081	NA	0.999797	0.999991
master_peak_268	1	358199	358353	0.619981	NA	1.36579	0.999991
master_peak_269	1	358387	358521	0.674933	0.696419	0.53657	0.999991
master_peak_270	1	358617	359004	-0.999236	0.248387	0.247668	0.999991
master_peak_271	1	362571	362676	-0.398622	NA	0.650868	0.999991
master_peak_272	1	365187	365230	0.924243	NA	0.31348	0.999991
master_peak_273	1	366518	366592	-2.55217	NA	1.40074	0.999991
master_peak_277	1	371454	371500	-0.480551	NA	1.89107	0.999991
master_peak_289	1	384821	384981	-0.42371	NA	0.260916	0.999991
master_peak_292	1	389884	389946	1.81326	NA	-1.19681	0.999991
master_peak_296	1	393523	393572	-0.274215	NA	0.892141	0.999991
master_peak_304	1	404018	404152	-1.34666	NA	-1.19031	0.999991
master_peak_305	1	404525	404627	0.0401378	NA	1.23205	0.999991
master_peak_306	1	405465	405661	-1.55107	0.194498	0.307098	0.999991
master_peak_307	1	412017	412167	-1.37632	NA	-1.49368	0.999991
master_peak_308	1	414786	414956	-0.422126	0.762561	-0.126061	0.999991
master_peak_309	1	416037	416346	-0.726643	0.062313	0.3533	0.999991
master_peak_312	1	423269	423367	-0.472418	NA	0.0155996	0.999991
master_peak_315	1	424328	424446	-1.03345	NA	-0.365596	0.999991
master_peak_321	1	431717	431861	-0.538891	NA	0.12367	0.999991
master_peak_323	1	433652	433737	-0.359886	NA	1.58043	0.999991
master_peak_324	1	435724	435765	-0.0172791	NA	-1.051	0.999991
master_peak_326	1	436274	436328	-0.230334	NA	-0.468614	0.999991
master_peak_327	1	438482	438643	-1.03385	0.574865	-0.769392	0.999991
master_peak_334	1	446165	446306	-0.085605	NA	-0.945583	0.999991
master_peak_337	1	450827	451085	-0.729113	0.70222	-1.29318	0.999991
master_peak_340	1	451866	451942	0.474899	NA	-0.648807	0.999991
master_peak_343	1	462071	462203	0.0551529	NA	-0.530894	0.999991
master_peak_344	1	464782	464832	-2.66564	NA	2.52939	0.999991
master_peak_348	1	473305	473451	-2.06999	NA	0.622934	0.999991
master_peak_355	1	481751	481785	-0.043229	NA	-0.108888	0.999991
master_peak_362	1	499045	499210	-0.748552	0.436291	-0.342799	0.999991
master_peak_364	1	499507	499609	0.340582	NA	-0.278584	0.999991
master_peak_370	1	514162	514254	-0.150801	NA	-0.232616	0.999991
master_peak_372	1	514607	514708	-0.222912	NA	-0.367713	0.999991
master_peak_373	1	514774	514818	-1.00117	NA	1.02918	0.999991
master_peak_374	1	516684	516998	1.06587	0.505138	-1.39537	0.999991
master_peak_375	1	518530	518630	-1.32926	NA	0.906673	0.999991
master_peak_376	1	518772	518924	-0.912768	NA	0.283076	0.999991
master_peak_379	1	523744	523909	1.25493	NA	-0.578534	0.999991
master_peak_382	1	527146	527349	-0.909372	NA	-0.46029	0.999991
master_peak_383	1	529483	529582	-0.0981904	NA	0.470563	0.999991
master_peak_384	1	531903	531961	1.78531	NA	-0.773433	0.999991
master_peak_385	1	532054	532119	0.28511	NA	-0.626694	0.999991
master_peak_392	1	548576	548709	0.492479	NA	0.571161	0.999991
master_peak_393	1	553005	553116	-0.0754364	NA	0.177573	0.999991
master_peak_395	1	557185	557291	0.088397	NA	-0.710609	0.999991
master_peak_400	1	565090	565274	-0.481625	0.782343	0.351211	0.999991
master_peak_404	1	572656	572735	-0.972093	NA	0.391865	0.999991
master_peak_405	1	576704	576762	1.33887	NA	0.372868	0.999991
master_peak_407	1	584852	585003	-1.01458	NA	0.519924	0.999991
master_peak_408	1	585411	585594	-1.21338	0.288856	0.69049	0.999991
master_peak_412	1	587591	587723	-1.43056	NA	0.77768	0.999991
master_peak_414	1	590883	591060	0.237653	NA	-0.0978308	0.999991
master_peak_415	1	593065	593124	-0.307781	NA	-0.329054	0.999991
master_peak_419	1	596012	596086	-2.2148	NA	-0.0950077	0.999991
master_peak_424	1	604804	605117	-1.99487	0.0111427	-0.864197	0.999991
master_peak_428	1	612682	612904	0.431072	0.780684	0.21515	0.999991
master_peak_432	1	619349	619654	-0.923778	0.189869	-0.370071	0.999991
master_peak_434	1	622167	622362	-0.0972796	0.969212	-0.196674	0.999991
master_peak_436	1	625016	625123	-0.246156	NA	0.391345	0.999991
master_peak_437	1	626282	626388	0.983393	NA	0.319025	0.999991
master_peak_438	1	626506	626581	-2.86101	NA	2.29178	0.999991
master_peak_439	1	629064	629197	-1.37513	NA	0.749691	0.999991
master_peak_443	1	631462	631589	0.678618	NA	0.439011	0.999991
master_peak_444	1	633545	633736	0.703475	NA	-0.196606	0.999991
master_peak_446	1	638013	638162	0.306245	NA	-0.0703239	0.999991
master_peak_457	1	649419	649519	-3.84325	NA	3.29251	0.999991
master_peak_458	1	649590	649645	-1.56771	NA	2.27315	0.999991
master_peak_462	1	655852	656121	-0.0512059	0.983299	0.324047	0.999991
master_peak_463	1	656670	656927	1.26373	0.278774	0.273563	0.999991
master_peak_464	1	660716	660944	-0.516402	0.714721	0.470315	0.999991
master_peak_465	1	661438	661731	-1.03832	0.128089	0.771442	0.999991
master_peak_477	1	676758	676887	-1.47629	NA	-0.104475	0.999991
master_peak_479	1	680202	680265	-0.111606	NA	0.307662	0.999991
master_peak_480	1	680351	680455	-0.248389	NA	1.0966	0.999991
master_peak_482	1	684541	684701	-0.568335	0.735864	0.644723	0.999991
master_peak_483	1	685316	685451	-0.281445	NA	0.00526295	0.999991
master_peak_485	1	685940	686379	-1.08028	0.0990336	0.14618	0.999991
master_peak_487	1	688609	688681	0.263251	NA	0.323748	0.999991
master_peak_490	1	694954	695029	1.92822	NA	-0.627358	0.999991
master_peak_491	1	695224	695300	0.501823	NA	0.277518	0.999991
master_peak_495	1	696100	696235	0.883607	NA	-0.0779507	0.999991
master_peak_496	1	696500	696559	1.78108	NA	-2.02001	0.999991
master_peak_502	1	701312	701370	-0.450236	NA	0.706037	0.999991
master_peak_503	1	702595	702748	0.449812	NA	0.0578744	0.999991
master_peak_504	1	704996	705066	0.434017	NA	-1.29219	0.999991
master_peak_505	1	705110	705230	-1.37091	NA	-0.533761	0.999991
master_peak_513	1	717566	717664	0.00297046	NA	0.97451	0.999991
master_peak_514	1	717699	717844	-0.278733	NA	-0.420274	0.999991
master_peak_515	1	717892	718001	-0.846654	NA	-0.296014	0.999991
master_peak_517	1	718916	719087	0.0131236	NA	0.337417	0.999991
master_peak_518	1	719203	719370	0.157088	NA	0.588121	0.999991
master_peak_520	1	721439	721624	1.31637	0.322076	-1.21012	0.999991
master_peak_522	1	724966	725014	-0.435954	NA	2.29789	0.999991
master_peak_525	1	728732	728778	-1.29651	NA	2.02026	0.999991
master_peak_526	1	730466	730546	-0.891525	NA	0.514773	0.999991
master_peak_528	1	733995	734408	0.779897	0.26245	-0.714196	0.999991
master_peak_529	1	736379	736449	-0.0984708	NA	-1.18978	0.999991
master_peak_530	1	739478	739583	1.92344	NA	-2.58479	0.999991
master_peak_532	1	744351	744552	1.40595	0.440026	0.0528783	0.999991
master_peak_533	1	744653	744693	0.552826	NA	-0.689478	0.999991
master_peak_535	1	750611	750794	1.1509	NA	-0.0587586	0.999991
master_peak_537	1	751914	752097	1.00055	NA	0.187754	0.999991
master_peak_541	1	758139	758225	-0.884661	NA	0.189482	0.999991
master_peak_543	1	759916	760008	0.157361	NA	0.556873	0.999991
master_peak_545	1	762413	762538	0.301785	NA	-0.765408	0.999991
master_peak_547	1	765055	765292	-0.758761	0.704372	-0.121453	0.999991
master_peak_551	1	768048	768142	-0.445405	NA	-0.000827203	0.999991
master_peak_553	1	770417	770661	1.01301	0.183841	0.0811124	0.999991
master_peak_557	1	776675	776770	0.0964676	NA	0.778673	0.999991
master_peak_562	1	795808	796111	0.269752	0.913083	0.0104542	0.999991
master_peak_566	1	802163	802490	-0.696504	0.178862	0.0416514	0.999991
master_peak_570	1	810646	810910	-0.500094	0.742663	0.779771	0.999991
master_peak_572	1	814674	814965	0.0573755	0.979136	-0.68776	0.999991
master_peak_574	1	816029	816124	0.113815	NA	-0.677822	0.999991
master_peak_575	1	818221	818397	-2.16672	NA	2.5487	0.999991
master_peak_576	1	818505	818616	1.70177	NA	-0.755378	0.999991
master_peak_577	1	818666	818861	-0.357156	0.886778	1.4986	0.999991
master_peak_578	1	822312	822389	1.28896	NA	0.155012	0.999991
master_peak_579	1	824470	824544	1.49499	NA	-0.208978	0.999991
master_peak_581	1	826396	826759	0.540205	0.696348	0.216865	0.999991
master_peak_582	1	826808	827027	0.172043	NA	0.932761	0.999991
master_peak_591	1	843968	844349	1.47061	0.105339	-1.17288	0.999991
master_peak_592	1	846987	847160	1.39639	0.19598	0.494722	0.999991
master_peak_593	1	848838	849124	-1.81566	0.100131	0.195869	0.999991
master_peak_594	1	852391	852608	1.05148	0.405609	-0.854053	0.999991
master_peak_596	1	854210	854452	-1.30943	0.0192711	0.671128	0.999991
master_peak_600	1	864504	865070	-2.20384	2.22851e-06	-0.848345	0.999991
master_peak_601	1	865104	865205	-0.875133	NA	-0.248807	0.999991
master_peak_604	1	874057	874225	0.989424	NA	0.179766	0.999991
master_peak_605	1	874300	874377	3.68493	NA	-0.917167	0.999991
master_peak_607	1	877733	877882	-0.928311	NA	-1.17204	0.999991
master_peak_608	1	880202	880308	0.790698	NA	0.373966	0.999991
master_peak_612	1	885091	885279	-0.817379	0.641733	0.708586	0.999991
master_peak_613	1	885899	886050	0.543709	NA	-0.532729	0.999991
master_peak_614	1	891305	891359	0.93933	NA	0.733653	0.999991
master_peak_616	1	892106	892261	-2.97733	NA	2.98482	0.999991
master_peak_621	1	898747	898827	-0.00153359	NA	0.634056	0.999991
master_peak_623	1	901224	901267	0.716692	NA	0.597596	0.999991
master_peak_626	1	904836	905152	-1.60349	0.049682	-1.03349	0.999991
master_peak_627	1	906402	906473	1.08716	NA	-0.0417685	0.999991
master_peak_628	1	908699	908773	-1.06467	NA	1.41857	0.999991
master_peak_634	1	916057	916101	-1.5078	NA	1.2373	0.999991
master_peak_637	1	919436	919487	0.278596	NA	0.155116	0.999991
master_peak_639	1	922104	922191	-2.52012	NA	-0.307646	0.999991
master_peak_641	1	924733	924828	0.213064	NA	0.726259	0.999991
master_peak_646	1	931599	931795	-0.324562	NA	0.698945	0.999991
master_peak_647	1	931857	931922	0.400744	NA	-0.216895	0.999991
master_peak_656	1	939803	939948	-0.757879	NA	1.14797	0.999991
master_peak_657	1	941978	942148	0.226851	NA	0.411078	0.999991
master_peak_658	1	945960	946110	1.37209	NA	-1.33566	0.999991
master_peak_666	1	965024	965202	0.0874751	0.95686	0.115466	0.999991
master_peak_668	1	966368	966500	-1.67378	0.0408795	0.567578	0.999991
master_peak_670	1	975484	975592	0.344486	NA	0.726288	0.999991
master_peak_677	1	981207	981314	0.393045	NA	-0.205604	0.999991
master_peak_678	1	989286	989399	-0.355055	NA	-0.223866	0.999991
master_peak_679	1	989442	989516	2.72686	NA	-1.4763	0.999991
master_peak_680	1	991097	991161	-0.239718	NA	-2.22928	0.999991
master_peak_682	1	992708	992757	1.85134	NA	-1.02856	0.999991
master_peak_687	1	999828	1000087	-0.275655	0.910925	0.439249	0.999991
master_peak_689	1	1002178	1002255	1.10209	NA	0.540886	0.999991
master_peak_691	1	1002838	1002992	-0.0790896	NA	0.660307	0.999991
master_peak_694	1	1009972	1010255	1.25356	0.44608	0.138215	0.999991
master_peak_696	1	1012975	1013048	0.211785	NA	0.271377	0.999991
master_peak_697	1	1020486	1020566	-0.17849	NA	-0.30857	0.999991
master_peak_701	1	1026026	1026105	0.273005	NA	0.875117	0.999991
master_peak_702	1	1028553	1028747	0.65577	NA	0.230403	0.999991
master_peak_704	1	1031572	1031637	0.0347462	NA	0.98931	0.999991
master_peak_705	1	1033352	1033498	0.869754	NA	0.958068	0.999991
master_peak_707	1	1039373	1039462	1.86915	NA	-0.542843	0.999991
master_peak_709	1	1044370	1044439	0.507115	NA	0.264236	0.999991
master_peak_712	1	1051528	1051666	2.47622	NA	-0.156192	0.999991
master_peak_713	1	1053714	1053963	1.20053	0.594903	-0.662731	0.999991
master_peak_714	1	1056073	1056137	-1.13843	NA	0.816499	0.999991
master_peak_716	1	1058313	1058367	0.479582	NA	-0.0785634	0.999991
master_peak_717	1	1058430	1058490	0.694897	NA	-0.0598459	0.999991
master_peak_720	1	1069238	1069402	-0.527358	NA	-0.695431	0.999991
master_peak_723	1	1072740	1072812	0.987119	NA	0.579171	0.999991
master_peak_724	1	1072897	1072941	1.3166	NA	-0.564863	0.999991
master_peak_728	1	1077208	1077315	1.11419	NA	0.254449	0.999991
master_peak_734	1	1089460	1089802	0.863262	0.601521	-0.313533	0.999991
master_peak_740	1	1094351	1094422	0.846032	NA	0.686044	0.999991
master_peak_745	1	1110130	1110206	0.56394	NA	0.182243	0.999991
master_peak_746	1	1111099	1111289	0.454854	NA	-0.151956	0.999991
master_peak_748	1	1115252	1115409	0.786981	NA	-0.338952	0.999991
master_peak_751	1	1120055	1120195	-0.506472	NA	0.659393	0.999991
master_peak_753	1	1123163	1123415	0.93239	0.561698	-0.122538	0.999991
master_peak_755	1	1129258	1129303	2.56463	NA	-2.1523	0.999991
master_peak_759	1	1140626	1140713	-0.261998	NA	0.496839	0.999991
master_peak_769	1	1161598	1161941	1.30749	0.270347	-0.408176	0.999991
master_peak_771	1	1164105	1164375	0.151666	0.953548	-1.17758	0.999991
master_peak_772	1	1171182	1171379	1.74213	NA	0.330131	0.999991
master_peak_775	1	1177090	1177314	-0.203801	NA	0.418663	0.999991
master_peak_777	1	1180028	1180089	0.334573	NA	-0.304353	0.999991
master_peak_784	1	1193203	1193293	2.34412	NA	-1.49776	0.999991
master_peak_785	1	1193859	1193937	1.58047	NA	-0.954847	0.999991
master_peak_790	1	1207965	1208039	-1.32599	NA	0.771286	0.999991
master_peak_798	1	1215891	1216007	-1.25857	NA	0.47048	0.999991
master_peak_810	1	1230342	1230457	0.875902	NA	-1.16435	0.999991
master_peak_814	1	1239036	1239132	0.736927	NA	-0.652262	0.999991
master_peak_819	1	1245940	1246120	-0.180214	NA	-0.121652	0.999991
master_peak_821	1	1253972	1254108	-1.66167	0.141328	0.623287	0.999991
master_peak_822	1	1254216	1254486	-0.984714	0.000665056	-0.282974	0.999991
master_peak_823	1	1263300	1263415	0.323958	NA	-0.0677923	0.999991
master_peak_825	1	1266853	1267041	-0.753033	NA	0.180668	0.999991
master_peak_827	1	1272813	1272875	0.0739934	NA	-0.749166	0.999991
master_peak_832	1	1275445	1275485	1.77691	NA	-0.406951	0.999991
master_peak_833	1	1276961	1277149	-4.44754	0.000432519	0.693551	0.999991
master_peak_834	1	1279009	1279085	0.754922	NA	-0.637308	0.999991
master_peak_840	1	1307503	1307600	0.47114	NA	-0.490742	0.999991
master_peak_841	1	1307703	1307948	-1.17841	0.379699	-0.390432	0.999991
master_peak_849	1	1320497	1320934	-0.994537	0.171583	-0.110186	0.999991
master_peak_852	1	1327051	1327116	-0.33588	NA	-0.669321	0.999991
master_peak_853	1	1327207	1327262	-0.994278	NA	0.172195	0.999991
master_peak_854	1	1327306	1327375	1.39018	NA	-0.748866	0.999991
master_peak_856	1	1329863	1330103	-2.56947	0.0737849	-0.355554	0.999991
master_peak_858	1	1338627	1338841	-3.71612	0.000171156	0.126878	0.999991
master_peak_859	1	1340665	1340793	1.2688	NA	0.659692	0.999991
master_peak_860	1	1344448	1344675	-0.654506	NA	1.19223	0.999991
master_peak_861	1	1344774	1344874	0.222253	NA	-0.251582	0.999991
master_peak_865	1	1353237	1353332	0.519543	NA	0.00408235	0.999991
master_peak_866	1	1353441	1353493	1.55312	NA	0.159872	0.999991
master_peak_871	1	1357141	1357208	-0.513408	NA	0.787477	0.999991
master_peak_872	1	1359457	1359573	1.03017	NA	-1.43588	0.999991
master_peak_880	1	1365950	1366007	1.07881	NA	-2.17346	0.999991
master_peak_884	1	1373359	1373455	-1.71048	NA	-0.497959	0.999991
master_peak_886	1	1376482	1376579	0.912042	NA	-1.52711	0.999991
master_peak_887	1	1376740	1376877	0.188305	0.916774	-0.274085	0.999991
master_peak_893	1	1386288	1386543	0.551071	0.782529	0.0459421	0.999991
master_peak_894	1	1389256	1389396	0.0341805	NA	0.494581	0.999991
master_peak_895	1	1389946	1390163	-0.656598	0.480997	0.281346	0.999991
master_peak_896	1	1397215	1397408	-0.108834	0.953951	-0.554229	0.999991
master_peak_897	1	1397620	1397720	-0.840855	NA	0.635706	0.999991
master_peak_901	1	1407569	1407668	-0.0452834	NA	0.489631	0.999991
master_peak_902	1	1410381	1410481	-0.615295	NA	-1.19109	0.999991
master_peak_905	1	1417216	1417415	0.952395	NA	0.0298399	0.999991
master_peak_906	1	1420936	1421182	-0.179657	NA	1.55591	0.999991
master_peak_910	1	1430126	1430457	-0.735933	0.595569	-0.789682	0.999991
master_peak_911	1	1433109	1433205	-1.15251	NA	0.691463	0.999991
master_peak_913	1	1437823	1437967	-0.238962	NA	0.320675	0.999991
master_peak_914	1	1438692	1438766	-0.845629	NA	1.25542	0.999991
master_peak_915	1	1441823	1442060	1.01138	NA	0.167058	0.999991
master_peak_916	1	1444640	1444721	0.104249	NA	1.1299	0.999991
master_peak_921	1	1451919	1452132	-1.57364	0.254183	-0.179917	0.999991
master_peak_922	1	1454509	1454580	-0.140559	NA	-1.8873	0.999991
master_peak_923	1	1454651	1454820	-0.0607822	NA	0.336097	0.999991
master_peak_925	1	1456890	1457031	-0.446809	NA	1.40747	0.999991
master_peak_927	1	1459447	1459556	-0.657687	NA	1.01254	0.999991
master_peak_930	1	1473357	1473528	0.464328	NA	-0.538835	0.999991
master_peak_931	1	1481290	1481407	0.273438	NA	0.41598	0.999991
master_peak_933	1	1485911	1486031	-1.01786	NA	-0.423424	0.999991
master_peak_935	1	1487730	1487945	-0.0809368	0.944499	0.0372211	0.999991
master_peak_936	1	1491631	1491765	1.83907	0.177518	-0.103192	0.999991
master_peak_938	1	1493443	1493507	0.716842	NA	0.864319	0.999991
master_peak_940	1	1497878	1498135	-0.646	0.762476	-0.557599	0.999991
master_peak_942	1	1504676	1504903	0.187963	NA	0.352509	0.999991
master_peak_944	1	1506589	1506924	0.839711	0.602725	0.656736	0.999991
master_peak_946	1	1507193	1507262	0.333286	NA	0.383549	0.999991
master_peak_950	1	1511770	1511856	0.846127	NA	-0.762652	0.999991
master_peak_952	1	1514575	1515035	-1.54172	0.0490958	-0.123464	0.999991
master_peak_954	1	1516875	1517102	0.011151	0.997102	0.675197	0.999991
master_peak_959	1	1527230	1527350	-1.29806	NA	-0.159324	0.999991
master_peak_960	1	1527457	1527513	-0.814557	NA	1.63496	0.999991
master_peak_962	1	1531264	1531420	0.0632217	NA	0.0439891	0.999991
master_peak_963	1	1536121	1536359	-0.580617	NA	0.29934	0.999991
master_peak_968	1	1561157	1561289	-0.97921	0.324182	0.4459	0.999991
master_peak_969	1	1564021	1564398	-0.722319	0.0220259	0.166546	0.999991
master_peak_970	1	1564878	1564958	-0.847635	0.619391	0.229649	0.999991
master_peak_971	1	1565327	1565409	-0.298304	0.896325	0.65533	0.999991
master_peak_972	1	1565654	1565921	-1.83819	0.000205929	0.311065	0.999991
master_peak_973	1	1566173	1566375	0.347857	0.76717	-0.954201	0.999991
master_peak_974	1	1567047	1567229	-1.11515	0.165461	-0.119823	0.999991
master_peak_975	1	1574228	1574334	-1.02343	NA	1.6556	0.999991
master_peak_976	1	1574974	1575054	1.22866	NA	-0.6787	0.999991
master_peak_977	1	1575590	1575634	1.9359	NA	1.04776	0.999991
master_peak_983	1	1583178	1583266	0.637343	NA	1.77681	0.999991
master_peak_984	1	1584185	1584367	-0.189635	NA	0.813038	0.999991
master_peak_988	1	1587782	1587838	1.57183	NA	-1.4419	0.999991
master_peak_989	1	1588154	1588402	1.06113	0.404588	0.463862	0.999991
master_peak_992	1	1591274	1591376	0.463838	NA	-0.551757	0.999991
master_peak_995	1	1597965	1598074	0.164084	NA	-0.991989	0.999991
master_peak_1000	1	1606873	1606958	0.27655	NA	1.47108	0.999991
master_peak_1001	1	1608509	1608620	1.9572	NA	-0.201059	0.999991
master_peak_1005	1	1616076	1616200	1.07874	NA	-0.544561	0.999991
master_peak_1007	1	1618137	1618455	-0.929915	0.308921	1.11953	0.999991
master_peak_1008	1	1620759	1620881	1.34246	NA	0.213971	0.999991
master_peak_1009	1	1621046	1621120	0.246887	NA	2.06278	0.999991
master_peak_1010	1	1621377	1621516	0.11283	NA	0.116305	0.999991
master_peak_1011	1	1624556	1624803	0.941702	0.297146	-0.93709	0.999991
master_peak_1012	1	1627453	1627519	0.963386	NA	-0.844391	0.999991
master_peak_1016	1	1639719	1639826	0.174617	NA	-1.6137	0.999991
master_peak_1018	1	1641459	1641570	0.214375	NA	1.05893	0.999991
master_peak_1019	1	1641698	1641762	-1.08267	NA	0.898439	0.999991
master_peak_1020	1	1643001	1643068	0.00961693	NA	-0.54118	0.999991
master_peak_1021	1	1645300	1645347	2.37862	NA	-0.189558	0.999991
master_peak_1023	1	1648320	1648433	-0.503983	NA	0.215796	0.999991
master_peak_1025	1	1648886	1648967	-0.330307	NA	0.828513	0.999991
master_peak_1026	1	1649286	1649514	0.792919	NA	1.80091	0.999991
master_peak_1028	1	1653475	1653608	0.0201779	NA	-0.424961	0.999991
master_peak_1029	1	1654824	1654857	0.261037	NA	0.985016	0.999991
master_peak_1030	1	1655534	1655606	0.3252	NA	-0.346902	0.999991
master_peak_1039	1	1672676	1672749	-0.897642	NA	0.778318	0.999991
master_peak_1040	1	1672813	1672899	-0.422403	NA	0.968834	0.999991
master_peak_1041	1	1675025	1675099	3.43329	NA	-1.02306	0.999991
master_peak_1042	1	1679884	1679985	-0.0566252	NA	-0.286226	0.999991
master_peak_1043	1	1682292	1682346	3.74049	NA	-0.473268	0.999991
master_peak_1044	1	1682381	1682574	-0.319391	NA	1.45731	0.999991
master_peak_1045	1	1687114	1687208	0.648716	NA	1.91314	0.999991
master_peak_1054	1	1701459	1701616	2.50984	0.0179446	-0.73548	0.999991
master_peak_1058	1	1745338	1745541	1.91174	NA	-0.442623	0.999991
master_peak_1062	1	1750382	1750456	0.667158	NA	-0.446412	0.999991
master_peak_1064	1	1753923	1753967	0.946181	NA	-0.381983	0.999991
master_peak_1066	1	1760853	1760928	2.55534	NA	-0.19621	0.999991
master_peak_1067	1	1763978	1764015	1.62337	NA	0.572939	0.999991
master_peak_1068	1	1767091	1767170	1.70044	NA	-0.586346	0.999991
master_peak_1070	1	1776973	1777039	-0.96823	NA	-1.83307	0.999991
master_peak_1071	1	1780303	1780419	-0.706268	NA	-0.400847	0.999991
master_peak_1072	1	1781479	1781725	-5.25573	0.139871	1.48169	0.999991
master_peak_1080	1	1804178	1804248	-0.976737	NA	-0.297468	0.999991
master_peak_1082	1	1809550	1809667	0.603431	NA	0.212792	0.999991
master_peak_1083	1	1809707	1809831	-0.980933	NA	1.38831	0.999991
master_peak_1085	1	1820358	1820438	0.358173	NA	0.542336	0.999991
master_peak_1087	1	1823017	1823190	0.0960723	NA	-0.752201	0.999991
master_peak_1094	1	1830256	1830329	-1.71606	NA	1.48788	0.999991
master_peak_1095	1	1834848	1834942	0.25537	NA	-1.76719	0.999991
master_peak_1099	1	1844063	1844134	2.3405	NA	0.199776	0.999991
master_peak_1103	1	1857154	1857231	1.32889	NA	0.0862659	0.999991
master_peak_1105	1	1859633	1859700	0.239288	NA	1.27717	0.999991
master_peak_1107	1	1865738	1865863	-0.0233097	NA	-0.110894	0.999991
master_peak_1108	1	1868912	1868989	0.516455	NA	0.285841	0.999991
master_peak_1109	1	1869363	1869517	-0.422008	NA	0.0975931	0.999991
master_peak_1117	1	1878511	1878614	0.86038	NA	-0.739097	0.999991
master_peak_1118	1	1878970	1879141	-0.146149	NA	0.0519711	0.999991
master_peak_1122	1	1885683	1885834	-0.151912	0.945059	-0.820232	0.999991
master_peak_1127	1	1900464	1900586	-0.707998	NA	1.54375	0.999991
master_peak_1130	1	1907304	1907414	0.21379	NA	-0.184463	0.999991
master_peak_1131	1	1908266	1908465	0.562135	0.816977	-0.237657	0.999991
master_peak_1144	1	1926749	1926849	-2.07052	NA	2.89478	0.999991
master_peak_1147	1	1927902	1928026	-0.509929	0.770868	0.120216	0.999991
master_peak_1149	1	1930181	1930267	0.219907	NA	-0.283022	0.999991
master_peak_1150	1	1932611	1932680	-0.0694859	NA	0.204648	0.999991
master_peak_1153	1	1935327	1935418	0.230512	NA	-0.435203	0.999991
master_peak_1154	1	1939357	1939488	1.00901	NA	1.64191	0.999991
master_peak_1160	1	1945897	1945995	2.64908	NA	1.22316	0.999991
master_peak_1161	1	1946115	1946288	1.04675	NA	-0.10559	0.999991
master_peak_1162	1	1948269	1948427	0.452454	0.885008	-0.71943	0.999991
master_peak_1163	1	1948514	1948721	-2.07944	0.0914942	0.56841	0.999991
master_peak_1164	1	1953373	1953568	-0.45811	0.577718	-0.133033	0.999991
master_peak_1165	1	1953699	1953932	0.146447	0.956917	0.0250104	0.999991
master_peak_1169	1	1961562	1961800	-0.201635	0.883978	0.55109	0.999991
master_peak_1170	1	1964719	1965110	-0.42421	0.405769	-0.0555549	0.999991
master_peak_1172	1	1966430	1966517	0.018518	NA	1.06585	0.999991
master_peak_1174	1	1970913	1971043	1.0109	NA	-0.581569	0.999991
master_peak_1175	1	1971150	1971371	-0.509521	NA	1.18841	0.999991
master_peak_1178	1	1973166	1973324	-1.22213	NA	0.659302	0.999991
master_peak_1181	1	1978812	1979268	1.36436	0.086609	-0.242993	0.999991
master_peak_1182	1	1980379	1980643	0.299556	0.85571	0.141313	0.999991
master_peak_1183	1	1984160	1984216	2.51332	NA	0.255582	0.999991
master_peak_1184	1	1984261	1984378	-0.334235	NA	-0.987471	0.999991
master_peak_1187	1	1991025	1991282	2.6887	0.000533465	-0.903134	0.999991
master_peak_1188	1	1993725	1994133	1.1777	0.00424886	-0.243235	0.999991
master_peak_1189	1	1995853	1996091	0.975363	0.315467	-0.263732	0.999991
master_peak_1190	1	1997300	1997497	0.913953	0.507332	-0.656601	0.999991
master_peak_1191	1	2001464	2001596	-0.581392	NA	0.510728	0.999991
master_peak_1192	1	2001723	2001783	0.954724	NA	-1.39305	0.999991
master_peak_1194	1	2004622	2004738	3.15532	NA	-2.45469	0.999991
master_peak_1195	1	2007321	2007436	1.17298	NA	0.608577	0.999991
master_peak_1196	1	2007481	2007588	1.1988	NA	0.397218	0.999991
master_peak_1198	1	2010753	2010996	0.0332089	NA	0.662254	0.999991
master_peak_1201	1	2016127	2016187	-0.290148	NA	-1.33081	0.999991
master_peak_1203	1	2019391	2019615	2.25041	NA	0.199161	0.999991
master_peak_1204	1	2019657	2019798	1.8339	NA	-0.871961	0.999991
master_peak_1206	1	2022271	2022530	0.813589	0.609887	0.494514	0.999991
master_peak_1209	1	2027647	2027715	1.04009	NA	-0.906706	0.999991
master_peak_1210	1	2030921	2031101	-0.584417	NA	-0.107506	0.999991
master_peak_1212	1	2033344	2033610	-2.36735	0.0998266	0.798967	0.999991
master_peak_1214	1	2036175	2036392	-0.724429	0.631589	-0.779006	0.999991
master_peak_1217	1	2042652	2042748	-1.77174	NA	2.79131	0.999991
master_peak_1219	1	2043000	2043086	0.0643584	NA	-0.0240488	0.999991
master_peak_1226	1	2055587	2055660	1.88861	NA	-0.922284	0.999991
master_peak_1227	1	2055769	2056024	1.49424	0.181542	-1.14153	0.999991
master_peak_1231	1	2057877	2058009	0.252968	0.911842	0.415649	0.999991
master_peak_1232	1	2058363	2058744	-1.9943	0.00886361	0.542106	0.999991
master_peak_1238	1	2073775	2074260	-0.798575	0.0813572	1.68032	0.0110377
master_peak_1239	1	2074444	2074605	-0.574715	0.702782	0.907334	0.999991
master_peak_1242	1	2087929	2088061	0.18368	NA	0.456969	0.999991
master_peak_1243	1	2089172	2089276	0.500547	NA	-0.367841	0.999991
master_peak_1252	1	2102830	2103251	-0.581329	0.38488	0.575282	0.999991
master_peak_1253	1	2105113	2105240	-0.651638	NA	0.627087	0.999991
master_peak_1255	1	2112334	2112677	-1.35194	0.000215283	0.359204	0.999991
master_peak_1257	1	2113394	2113469	-1.62396	0.168062	0.567102	0.999991
master_peak_1258	1	2119925	2120008	0.506022	NA	-0.92647	0.999991
master_peak_1259	1	2120798	2120870	1.28047	NA	0.470512	0.999991
master_peak_1260	1	2122858	2122976	0.185886	NA	0.17904	0.999991
master_peak_1261	1	2124484	2124564	-1.55096	NA	0.855953	0.999991
master_peak_1262	1	2127659	2127783	0.188812	NA	0.229062	0.999991
master_peak_1265	1	2131211	2131351	1.97576	NA	0.3965	0.999991
master_peak_1266	1	2132874	2133128	0.475782	NA	0.200041	0.999991
master_peak_1270	1	2135781	2135985	-0.896598	NA	1.22847	0.999991
master_peak_1271	1	2138949	2139093	0.586297	NA	0.219257	0.999991
master_peak_1273	1	2140872	2140962	0.381546	NA	-0.257694	0.999991
master_peak_1275	1	2146611	2146763	-0.648866	NA	0.576193	0.999991
master_peak_1277	1	2148203	2148369	-0.0130238	NA	0.699504	0.999991
master_peak_1282	1	2154024	2154218	-0.604758	0.495548	0.263807	0.999991
master_peak_1283	1	2154308	2154687	-0.089451	0.965534	0.0760124	0.999991
master_peak_1285	1	2157916	2158109	-0.131152	0.956897	-0.0537198	0.999991
master_peak_1286	1	2160225	2160292	2.08918	NA	0.593256	0.999991
master_peak_1287	1	2160337	2160734	-0.6242	0.448746	-0.118153	0.999991
master_peak_1289	1	2162286	2162461	-0.966933	0.578605	0.075964	0.999991
master_peak_1290	1	2162611	2162720	-0.745125	NA	0.916485	0.999991
master_peak_1291	1	2164992	2165205	0.195657	0.905226	0.295753	0.999991
master_peak_1294	1	2170623	2170858	1.97565	NA	-0.473192	0.999991
master_peak_1295	1	2173600	2173693	-1.04496	NA	0.157453	0.999991
master_peak_1296	1	2175768	2176347	-2.38109	0.000259926	-0.137955	0.999991
master_peak_1298	1	2179118	2179204	-1.15913	NA	-0.909577	0.999991
master_peak_1302	1	2216346	2216626	0.0983805	0.960418	0.207952	0.999991
master_peak_1303	1	2218356	2218475	0.464016	NA	-0.0613711	0.999991
master_peak_1304	1	2218599	2218689	-1.26552	NA	-0.168273	0.999991
master_peak_1305	1	2221205	2221520	-2.27133	0.00022439	-0.288726	0.999991
master_peak_1307	1	2234086	2234209	0.863888	NA	0.0445374	0.999991
master_peak_1309	1	2237939	2237990	1.7301	NA	0.179536	0.999991
master_peak_1314	1	2245034	2245068	-1.39067	NA	1.17479	0.999991
master_peak_1316	1	2246869	2246922	1.67973	NA	-1.18495	0.999991
master_peak_1318	1	2252524	2252706	-1.29664	0.153901	-0.655004	0.999991
master_peak_1320	1	2260398	2260510	1.19339	NA	-0.266831	0.999991
master_peak_1322	1	2260924	2261159	-0.135921	NA	0.27436	0.999991
master_peak_1323	1	2263522	2263557	0.411657	NA	-0.602166	0.999991
master_peak_1325	1	2268876	2268943	2.28997	NA	-0.101852	0.999991
master_peak_1326	1	2268978	2269085	-3.11239	NA	2.99363	0.999991
master_peak_1327	1	2271336	2271445	-0.220949	0.918112	-0.377698	0.999991
master_peak_1329	1	2272409	2272702	0.796298	NA	0.37717	0.999991
master_peak_1332	1	2276447	2276575	0.479629	NA	-0.130797	0.999991
master_peak_1334	1	2278015	2278225	1.37173	0.35918	0.982051	0.999991
master_peak_1337	1	2281776	2281846	1.31604	NA	-0.453629	0.999991
master_peak_1342	1	2286549	2286687	-0.312516	NA	1.35215	0.999991
master_peak_1348	1	2292483	2292579	2.41378	NA	-0.889599	0.999991
master_peak_1352	1	2301765	2301884	0.417599	NA	-0.331851	0.999991
master_peak_1353	1	2305328	2305442	-0.458623	NA	-1.56927	0.999991
master_peak_1354	1	2307539	2307638	1.41232	NA	0.0569072	0.999991
master_peak_1355	1	2311723	2311815	-3.11587	NA	1.3612	0.999991
master_peak_1362	1	2319988	2320028	1.53107	NA	-0.402528	0.999991
master_peak_1363	1	2320111	2320242	-1.07911	NA	0.395073	0.999991
master_peak_1366	1	2329256	2329335	-0.828924	NA	-0.0233286	0.999991
master_peak_1369	1	2333632	2333857	1.1976	NA	-0.55656	0.999991
master_peak_1371	1	2336361	2336467	1.32193	NA	0.474561	0.999991
master_peak_1375	1	2340801	2340860	3.09785	NA	-2.32077	0.999991
master_peak_1376	1	2340943	2341035	-0.575561	NA	0.423851	0.999991
master_peak_1377	1	2341354	2341617	1.33764	0.439141	1.62662	0.999991
master_peak_1379	1	2344278	2344401	-0.511877	NA	-1.70568	0.999991
master_peak_1382	1	2350422	2350526	-0.664722	NA	0.236229	0.999991
master_peak_1384	1	2354721	2354892	0.240429	NA	1.38968	0.999991
master_peak_1389	1	2367143	2367234	-1.3236	NA	1.34992	0.999991
master_peak_1395	1	2377029	2377089	0.484985	NA	0.0497147	0.999991
master_peak_1401	1	2387091	2387356	0.207665	0.927496	-0.224197	0.999991
master_peak_1404	1	2393647	2393798	0.363099	NA	0.465469	0.999991
master_peak_1405	1	2395800	2395878	1.01672	NA	0.89781	0.999991
master_peak_1407	1	2397509	2397734	0.356785	NA	0.520933	0.999991
master_peak_1412	1	2402256	2402395	-0.493536	NA	1.41873	0.999991
master_peak_1414	1	2403076	2403269	0.303443	NA	0.613749	0.999991
master_peak_1415	1	2404922	2405059	-0.217807	NA	-0.0187431	0.999991
master_peak_1423	1	2420884	2420928	1.49572	NA	-0.488956	0.999991
master_peak_1430	1	2432331	2432499	1.15563	NA	-0.0964386	0.999991
master_peak_1435	1	2441976	2442151	1.77445	0.103741	0.781257	0.999991
master_peak_1437	1	2450387	2450448	-1.21326	NA	0.658538	0.999991
master_peak_1438	1	2450586	2450836	-0.398975	0.85463	-0.42678	0.999991
master_peak_1450	1	2470237	2470387	1.22705	0.34358	-0.29798	0.999991
master_peak_1452	1	2478435	2478517	0.994471	NA	-0.891929	0.999991
master_peak_1454	1	2481271	2481324	0.731575	NA	1.29161	0.999991
master_peak_1455	1	2481453	2481533	2.35171	NA	-0.489039	0.999991
master_peak_1457	1	2485190	2485477	0.152499	NA	-0.0771839	0.999991
master_peak_1459	1	2490142	2490235	0.712503	NA	-0.929106	0.999991
master_peak_1463	1	2494373	2494445	1.84359	NA	-0.0844183	0.999991
master_peak_1466	1	2503117	2503166	1.30552	NA	-0.343226	0.999991
master_peak_1467	1	2505816	2505921	-0.85562	NA	1.28275	0.999991
master_peak_1473	1	2513459	2513602	-0.305517	NA	0.798165	0.999991
master_peak_1476	1	2519326	2519384	0.28541	NA	1.02466	0.999991
master_peak_1481	1	2527980	2528212	1.9151	0.275485	-1.22376	0.999991
master_peak_1482	1	2530295	2530408	1.0424	NA	0.0410472	0.999991
master_peak_1483	1	2530441	2530569	0.724357	NA	0.412588	0.999991
master_peak_1486	1	2533972	2534010	1.21226	NA	-0.982901	0.999991
master_peak_1495	1	2549650	2549793	-0.135345	NA	1.0007	0.999991
master_peak_1500	1	2557214	2557276	-0.322159	NA	-0.280339	0.999991
master_peak_1506	1	2566502	2566740	0.777364	0.374742	0.296183	0.999991
master_peak_1516	1	2600285	2600363	-0.117131	NA	0.815083	0.999991
master_peak_1518	1	2601870	2601985	1.18388	NA	0.82236	0.999991
master_peak_1519	1	2604160	2604307	0.351365	NA	0.915539	0.999991
master_peak_1520	1	2604371	2604433	2.55647	NA	-0.224749	0.999991
master_peak_1523	1	2607369	2607712	-0.388602	0.770609	0.415789	0.999991
master_peak_1526	1	2613877	2614065	-0.187826	NA	-0.322461	0.999991
master_peak_1528	1	2616076	2616547	0.735769	0.639331	0.129357	0.999991
master_peak_1535	1	2624002	2624107	1.63825	NA	-0.0458869	0.999991
master_peak_1536	1	2625882	2626221	0.826909	0.70789	-0.0810669	0.999991
master_peak_1540	1	2630009	2630064	0.121149	NA	2.0057	0.999991
master_peak_1541	1	2631405	2631487	0.68524	NA	-0.578167	0.999991
master_peak_1543	1	2637742	2637844	-0.513145	NA	1.45428	0.999991
master_peak_1544	1	2637941	2638105	1.08195	NA	-0.422126	0.999991
master_peak_1545	1	2638795	2638991	-0.739347	NA	2.59726	0.999991
master_peak_1547	1	2645136	2645190	0.0204315	NA	0.655486	0.999991
master_peak_1549	1	2647824	2647913	0.73504	NA	-0.119099	0.999991
master_peak_1552	1	2649935	2650137	-0.52526	NA	0.123971	0.999991
master_peak_1554	1	2656639	2656691	2.78936	NA	-0.362571	0.999991
master_peak_1557	1	2658387	2658437	-0.991013	NA	2.17887	0.999991
master_peak_1565	1	2669923	2670319	-0.513788	0.73674	-0.865659	0.999991
master_peak_1566	1	2672384	2672552	0.160889	NA	-0.74744	0.999991
master_peak_1568	1	2674088	2674245	-0.561737	NA	-0.28232	0.999991
master_peak_1569	1	2674292	2674385	-0.427948	NA	-0.0704369	0.999991
master_peak_1571	1	2675903	2675959	1.07882	NA	0.0490867	0.999991
master_peak_1573	1	2676520	2676763	0.702581	NA	-0.369046	0.999991
master_peak_1578	1	2686077	2686146	0.241207	NA	-0.0861133	0.999991
master_peak_1580	1	2689811	2689909	1.22861	NA	-0.818671	0.999991
master_peak_1581	1	2692243	2692318	-1.18774	NA	2.41818	0.999991
master_peak_1583	1	2694096	2694267	-0.145339	NA	0.717894	0.999991
master_peak_1584	1	2695640	2695840	1.97106	0.237742	1.2473	0.999991
master_peak_1588	1	2701164	2701550	0.329595	0.887391	0.049076	0.999991
master_peak_1590	1	2706599	2706765	0.980616	NA	-0.238045	0.999991
master_peak_1592	1	2708488	2708599	3.3317	NA	0.159165	0.999991
master_peak_1593	1	2713387	2713463	2.67365	NA	-0.882789	0.999991
master_peak_1596	1	2714021	2714108	0.832098	NA	0.546371	0.999991
master_peak_1599	1	2716104	2716273	0.795309	0.677013	0.501252	0.999991
master_peak_1601	1	2718524	2718609	0.360808	NA	-0.2624	0.999991
master_peak_1603	1	2725086	2725144	-0.448742	NA	0.130406	0.999991
master_peak_1605	1	2726470	2726513	2.1591	NA	-0.26159	0.999991
master_peak_1607	1	2728840	2729180	-0.682692	0.676606	0.731448	0.999991
master_peak_1610	1	2741017	2741166	0.755917	NA	-0.864284	0.999991
master_peak_1611	1	2743229	2743411	0.335116	NA	-0.376258	0.999991
master_peak_1616	1	2754266	2754515	-1.26865	NA	0.607038	0.999991
master_peak_1617	1	2756752	2756995	0.363576	NA	-0.0374664	0.999991
master_peak_1619	1	2761992	2762110	0.230307	NA	-0.829496	0.999991
master_peak_1621	1	2767281	2767356	-0.146437	NA	0.820547	0.999991
master_peak_1626	1	2770559	2770813	1.20199	0.395379	0.403381	0.999991
master_peak_1637	1	2790503	2790619	0.166661	NA	-0.419002	0.999991
master_peak_1638	1	2790674	2790799	0.656597	NA	-0.41575	0.999991
master_peak_1640	1	2793088	2793211	2.32092	NA	0.372027	0.999991
master_peak_1641	1	2795517	2795585	0.971624	NA	-1.25889	0.999991
master_peak_1645	1	2798328	2798540	-0.856537	NA	1.42319	0.999991
master_peak_1647	1	2799073	2799113	0.0643877	NA	1.58459	0.999991
master_peak_1648	1	2800963	2801098	-0.0628221	NA	1.18803	0.999991
master_peak_1653	1	2807026	2807099	-0.794707	NA	0.0195191	0.999991
master_peak_1657	1	2812631	2812711	1.31554	NA	-2.00917	0.999991
master_peak_1660	1	2816719	2816814	2.15037	NA	-1.41694	0.999991
master_peak_1663	1	2820638	2820706	-1.58814	NA	-0.262096	0.999991
master_peak_1668	1	2826919	2826990	-2.28747	NA	2.84014	0.999991
master_peak_1669	1	2827254	2827433	1.06163	NA	-0.320356	0.999991
master_peak_1670	1	2829592	2829788	-0.32758	0.883583	-0.300157	0.999991
master_peak_1684	1	2846639	2846742	1.0316	NA	0.668843	0.999991
master_peak_1687	1	2848147	2848344	0.348189	0.88102	0.374927	0.999991
master_peak_1688	1	2853993	2854068	1.4659	NA	0.787832	0.999991
master_peak_1689	1	2854110	2854323	1.04449	0.537443	-0.527565	0.999991
master_peak_1692	1	2859438	2859500	0.227891	NA	1.43692	0.999991
master_peak_1696	1	2863787	2863846	1.59433	NA	0.211333	0.999991
master_peak_1698	1	2868218	2868280	0.939229	NA	0.236854	0.999991
master_peak_1700	1	2869523	2869602	1.7247	NA	-0.274919	0.999991
master_peak_1706	1	2873970	2874081	-0.465878	NA	-0.36618	0.999991
master_peak_1707	1	2877175	2877420	1.71202	0.0138772	0.509008	0.999991
master_peak_1708	1	2878461	2878928	1.23346	0.047879	-0.0525576	0.999991
master_peak_1712	1	2886038	2886228	-0.573337	NA	0.345732	0.999991
master_peak_1714	1	2888358	2888443	1.39456	NA	0.173094	0.999991
master_peak_1717	1	2892348	2892809	2.15503	0.000250692	0.166133	0.999991
master_peak_1718	1	2894206	2894312	1.98877	NA	-1.03189	0.999991
master_peak_1719	1	2894520	2894765	-1.0351	0.384904	-0.63765	0.999991
master_peak_1720	1	2898454	2898543	-2.57784	NA	2.86013	0.999991
master_peak_1723	1	2902541	2902731	1.29973	0.481787	-0.104444	0.999991
master_peak_1725	1	2905460	2905607	-0.371372	NA	1.40928	0.999991
master_peak_1728	1	2907913	2908226	2.15525	0.0012029	-0.230507	0.999991
master_peak_1729	1	2908294	2908338	2.10555	NA	0.836582	0.999991
master_peak_1734	1	2916216	2916548	-0.915993	0.280195	-0.262442	0.999991
master_peak_1738	1	2923781	2923985	0.941371	NA	-0.678217	0.999991
master_peak_1739	1	2929690	2929725	-0.195658	NA	1.25138	0.999991
master_peak_1744	1	2937577	2937748	0.161717	NA	-0.950039	0.999991
master_peak_1745	1	2937850	2937938	0.425189	NA	0.298375	0.999991
master_peak_1746	1	2939956	2940089	-1.01856	NA	1.92443	0.999991
master_peak_1747	1	2940152	2940233	0.612608	NA	-0.994199	0.999991
master_peak_1750	1	2942122	2942175	0.769827	NA	0.341976	0.999991
master_peak_1751	1	2943895	2943939	0.441247	NA	-0.916323	0.999991
master_peak_1759	1	2951464	2951579	0.589299	NA	-0.0560912	0.999991
master_peak_1760	1	2951650	2951780	0.941171	NA	-0.90625	0.999991
master_peak_1761	1	2957931	2958048	-0.0424112	NA	-0.32348	0.999991
master_peak_1763	1	2960171	2960284	0.0754642	NA	0.0969736	0.999991
master_peak_1767	1	2965508	2965582	0.082396	NA	-0.830411	0.999991
master_peak_1768	1	2967765	2967874	-0.0517294	NA	0.935421	0.999991
master_peak_1772	1	2975983	2976171	0.901406	NA	-1.42334	0.999991
master_peak_1776	1	2989636	2990078	0.542756	0.332245	-0.634039	0.999991
master_peak_1783	1	3005664	3005821	-0.432797	NA	1.0783	0.999991
master_peak_1786	1	3018389	3018467	0.514482	NA	0.124492	0.999991
master_peak_1787	1	3022520	3022789	1.11181	0.436237	0.153134	0.999991
master_peak_1797	1	3037547	3037634	-0.214607	NA	0.555949	0.999991
master_peak_1800	1	3042747	3043012	0.09917	0.972842	0.903626	0.999991
master_peak_1801	1	3046560	3046612	0.956375	NA	1.98203	0.999991
master_peak_1803	1	3048509	3048615	0.951636	NA	0.805899	0.999991
master_peak_1812	1	3068954	3069017	-0.849564	NA	0.276937	0.999991
master_peak_1815	1	3072417	3072531	1.14945	NA	-0.526853	0.999991
master_peak_1817	1	3074095	3074189	0.0355158	NA	1.10002	0.999991
master_peak_1823	1	3084588	3084740	-0.575788	NA	0.339104	0.999991
master_peak_1828	1	3093708	3093761	0.0914616	NA	1.16636	0.999991
master_peak_1831	1	3100597	3100665	-1.81584	NA	0.875788	0.999991
master_peak_1846	1	3127284	3127473	-0.0615213	0.98291	1.41504	0.999991
master_peak_1847	1	3136395	3136475	1.69048	NA	-1.03287	0.999991
master_peak_1851	1	3139201	3139457	0.182295	0.953364	-0.460019	0.999991
master_peak_1854	1	3142025	3142109	2.34984	NA	-0.416876	0.999991
master_peak_1875	1	3178393	3178501	2.03735	NA	-0.0716093	0.999991
master_peak_1876	1	3180062	3180130	-1.00833	NA	1.59536	0.999991
master_peak_1877	1	3183685	3183782	2.7595	NA	-2.17033	0.999991
master_peak_1879	1	3187779	3188052	-0.629544	NA	0.988266	0.999991
master_peak_1881	1	3192748	3192885	0.710594	NA	-1.2715	0.999991
master_peak_1884	1	3195530	3195783	0.0425452	NA	0.779341	0.999991
master_peak_1885	1	3195918	3195970	0.993664	NA	-0.688913	0.999991
master_peak_1887	1	3201003	3201154	-0.179405	NA	-0.205294	0.999991
master_peak_1888	1	3201197	3201294	1.64609	NA	-0.250002	0.999991
master_peak_1893	1	3207332	3207430	0.762478	NA	-0.752062	0.999991
master_peak_1894	1	3207600	3207712	0.619805	NA	-0.399836	0.999991
master_peak_1895	1	3207840	3207928	0.470637	NA	0.722473	0.999991
master_peak_1896	1	3208003	3208145	1.76619	NA	-1.02309	0.999991
master_peak_1899	1	3214448	3214496	0.436219	NA	0.672677	0.999991
master_peak_1904	1	3217905	3218002	1.87108	NA	-0.64988	0.999991
master_peak_1905	1	3218086	3218454	0.0153508	0.995912	0.0484	0.999991
master_peak_1907	1	3221774	3221930	0.458116	NA	1.06418	0.999991
master_peak_1908	1	3221963	3222018	-0.669633	NA	-0.541301	0.999991
master_peak_1913	1	3225213	3225476	0.274226	NA	-0.735812	0.999991
master_peak_1914	1	3227979	3228135	0.157758	NA	-0.0356432	0.999991
master_peak_1920	1	3233874	3233930	1.22439	NA	0.356884	0.999991
master_peak_1921	1	3234002	3234208	0.530111	NA	0.0743842	0.999991
master_peak_1929	1	3242918	3242984	3.66657	NA	-1.34899	0.999991
master_peak_1932	1	3247716	3248046	0.335723	0.867985	0.72248	0.999991
master_peak_1935	1	3256460	3256563	0.233861	NA	-1.70685	0.999991
master_peak_1941	1	3275170	3275378	-0.0701727	NA	0.394941	0.999991
master_peak_1944	1	3279871	3279944	-0.0796974	NA	0.256058	0.999991
master_peak_1954	1	3300620	3300679	2.30468	NA	-0.873984	0.999991
master_peak_1955	1	3300752	3300929	0.787974	NA	-1.08107	0.999991
master_peak_1957	1	3305396	3305696	1.19189	0.252536	0.142225	0.999991
master_peak_1958	1	3306234	3306314	-0.185831	NA	0.577579	0.999991
master_peak_1961	1	3310382	3310483	-0.76575	NA	0.773028	0.999991
master_peak_1965	1	3320743	3320926	-0.172196	0.866082	-0.36477	0.999991
master_peak_1966	1	3322365	3322590	-1.08004	0.555196	-1.06275	0.999991
master_peak_1968	1	3329266	3329447	0.0208476	NA	-0.54774	0.999991
master_peak_1969	1	3332087	3332214	0.443933	0.790357	-0.465917	0.999991
master_peak_1972	1	3332751	3332808	0.519924	NA	0.379201	0.999991
master_peak_1974	1	3337993	3338138	1.77407	NA	-1.41814	0.999991
master_peak_1978	1	3341127	3341227	-0.286368	NA	0.959318	0.999991
master_peak_1979	1	3343955	3344151	3.55964	0.00192032	-0.445324	0.999991
master_peak_1980	1	3346105	3346300	2.05701	0.153164	-0.782497	0.999991
master_peak_1985	1	3356269	3356321	2.00927	NA	-0.929287	0.999991
master_peak_1994	1	3364942	3365072	0.105248	NA	1.53632	0.999991
master_peak_1998	1	3376025	3376223	0.647672	NA	-0.856904	0.999991
master_peak_2001	1	3379165	3379341	-0.442427	NA	0.91586	0.999991
master_peak_2003	1	3386267	3386425	2.03253	0.151635	0.720829	0.999991
master_peak_2008	1	3390637	3390884	0.678407	NA	0.63717	0.999991
master_peak_2009	1	3399241	3399323	1.12466	NA	-0.308668	0.999991
master_peak_2010	1	3401282	3401334	-0.133555	NA	-0.323056	0.999991
master_peak_2012	1	3403512	3403583	1.85315	NA	-0.202369	0.999991
master_peak_2015	1	3410670	3410739	-0.312816	NA	1.0006	0.999991
master_peak_2018	1	3421227	3421297	0.815458	NA	0.442952	0.999991
master_peak_2022	1	3426776	3427131	1.50107	NA	0.312375	0.999991
master_peak_2023	1	3429052	3429138	3.0755	NA	-1.04068	0.999991
master_peak_2025	1	3430992	3431138	0.562878	NA	0.157074	0.999991
master_peak_2026	1	3435131	3435252	1.04628	NA	1.92181	0.999991
master_peak_2036	1	3457463	3457566	-0.146182	NA	0.241347	0.999991
master_peak_2039	1	3466626	3466662	0.592065	NA	-0.659022	0.999991
master_peak_2040	1	3468593	3468653	-0.851668	NA	0.104026	0.999991
master_peak_2041	1	3468731	3468850	1.07144	NA	-0.192237	0.999991
master_peak_2049	1	3487641	3487716	-0.126032	NA	-0.214547	0.999991
master_peak_2051	1	3490682	3490747	0.74945	NA	0.57876	0.999991
master_peak_2054	1	3494210	3494450	1.6393	0.199522	-1.15525	0.999991
master_peak_2056	1	3496249	3496355	0.769273	NA	-0.689263	0.999991
master_peak_2067	1	3520296	3520387	0.415922	NA	-0.506095	0.999991
master_peak_2071	1	3524241	3524272	0.864024	NA	1.46174	0.999991
master_peak_2074	1	3528088	3528320	0.945382	NA	-0.967304	0.999991
master_peak_2080	1	3533335	3533501	-0.964133	NA	0.681224	0.999991
master_peak_2086	1	3542742	3542778	-0.826633	NA	1.46812	0.999991
master_peak_2091	1	3553082	3553208	0.886898	NA	-0.674357	0.999991
master_peak_2092	1	3553305	3553355	0.546173	NA	0.565251	0.999991
master_peak_2097	1	3566555	3566730	1.43696	0.405087	-0.380966	0.999991
master_peak_2100	1	3577379	3577474	-1.71328	NA	2.99895	0.999991
master_peak_2107	1	3593292	3593369	-0.319099	NA	-0.0291128	0.999991
master_peak_2113	1	3613774	3613837	-2.43134	NA	1.12808	0.999991
master_peak_2114	1	3615324	3615456	-0.500988	0.756715	-0.286988	0.999991
master_peak_2118	1	3626174	3626294	1.0912	NA	-0.0308246	0.999991
master_peak_2120	1	3628917	3629077	-1.16287	NA	-0.222745	0.999991
master_peak_2121	1	3631691	3631859	0.296919	NA	-0.884247	0.999991
master_peak_2122	1	3635933	3636256	1.12185	0.663069	0.229709	0.999991
master_peak_2123	1	3636316	3636464	0.30227	0.870378	-0.147842	0.999991
master_peak_2124	1	3638410	3638449	1.13041	NA	-0.702031	0.999991
master_peak_2129	1	3642535	3642630	-1.66826	NA	2.0328	0.999991
master_peak_2130	1	3642766	3642968	1.54545	0.274364	0.125075	0.999991
master_peak_2131	1	3645047	3645170	1.35338	NA	-0.958475	0.999991
master_peak_2132	1	3647386	3647459	0.123074	NA	0.159376	0.999991
master_peak_2133	1	3650205	3650595	1.47725	0.0102494	-0.43036	0.999991
master_peak_2136	1	3657049	3657177	-0.0449052	NA	0.162432	0.999991
master_peak_2139	1	3657516	3657655	0.755024	NA	0.417362	0.999991
master_peak_2142	1	3667492	3667640	0.827302	NA	0.713734	0.999991
master_peak_2146	1	3675484	3675552	2.60983	NA	0.366299	0.999991
master_peak_2148	1	3701344	3701588	1.62675	0.245798	-0.281062	0.999991
master_peak_2151	1	3708717	3708834	3.56518	NA	-0.635853	0.999991
master_peak_2154	1	3714954	3715025	-2.28297	NA	2.8151	0.999991
master_peak_2155	1	3715121	3715253	0.618273	NA	-1.27865	0.999991
master_peak_2160	1	3718917	3718984	0.625673	NA	-0.317798	0.999991
master_peak_2165	1	3725916	3725987	1.77022	NA	-1.60428	0.999991
master_peak_2168	1	3734137	3734218	1.83017	NA	-0.453623	0.999991
master_peak_2172	1	3742408	3742606	0.215756	NA	0.50209	0.999991
master_peak_2173	1	3745005	3745262	-2.58382	0.0339478	0.44783	0.999991
master_peak_2174	1	3745297	3745396	-0.900866	NA	-0.145763	0.999991
master_peak_2175	1	3745436	3745538	-0.375805	NA	0.771998	0.999991
master_peak_2176	1	3748116	3748169	0.66192	NA	-0.414702	0.999991
master_peak_2178	1	3753150	3753258	0.362734	NA	-0.270996	0.999991
master_peak_2181	1	3759445	3759594	0.798144	NA	-0.00349474	0.999991
master_peak_2182	1	3759633	3759724	-0.924464	NA	1.74632	0.999991
master_peak_2185	1	3779880	3780079	-0.37831	0.848996	-0.105737	0.999991
master_peak_2189	1	3787043	3787289	1.13732	0.450522	0.375026	0.999991
master_peak_2192	1	3789477	3789537	0.438725	NA	0.155849	0.999991
master_peak_2194	1	3789765	3789995	1.30386	0.564462	0.610002	0.999991
master_peak_2196	1	3795084	3795247	1.55767	NA	-0.397397	0.999991
master_peak_2197	1	3795409	3795554	0.397641	NA	0.697638	0.999991
master_peak_2198	1	3795691	3795799	0.710722	NA	-0.0716669	0.999991
master_peak_2199	1	3797470	3797684	1.91151	NA	-0.333211	0.999991
master_peak_2206	1	3806988	3807058	-1.02016	NA	0.354033	0.999991
master_peak_2212	1	3821096	3821198	2.0443	NA	-1.76404	0.999991
master_peak_2227	1	3851567	3851855	-1.09746	0.272128	-0.439527	0.999991
master_peak_2230	1	3860352	3860402	-0.228664	NA	0.417967	0.999991
master_peak_2231	1	3860653	3860902	-0.258368	0.908838	-0.0875167	0.999991
master_peak_2233	1	3865402	3865812	0.115786	0.959058	-0.0147823	0.999991
master_peak_2234	1	3870028	3870138	0.397086	NA	-1.03031	0.999991
master_peak_2236	1	3872032	3872084	-0.371865	NA	0.884815	0.999991
master_peak_2241	1	3882050	3882141	-1.39171	NA	0.66512	0.999991
master_peak_2242	1	3882319	3882506	-0.367184	NA	-0.848507	0.999991
master_peak_2246	1	3885819	3886112	0.0815826	0.977907	-0.357459	0.999991
master_peak_2248	1	3898502	3898589	1.49542	NA	0.11413	0.999991
master_peak_2255	1	3918739	3919079	2.84499	8.34155e-05	-0.847599	0.999991
master_peak_2257	1	3920295	3920355	2.54834	NA	-0.756346	0.999991
master_peak_2258	1	3921642	3921725	1.40336	NA	0.0178169	0.999991
master_peak_2262	1	3929706	3929848	2.31703	NA	-0.268777	0.999991
master_peak_2265	1	3934319	3934404	2.50928	NA	-2.37778	0.999991
master_peak_2269	1	3941317	3941414	0.460448	NA	-0.0693864	0.999991
master_peak_2272	1	3943974	3944083	0.50196	NA	0.957824	0.999991
master_peak_2273	1	3947737	3947864	1.02599	NA	-0.0344617	0.999991
master_peak_2274	1	3954099	3954172	0.799878	NA	-1.48896	0.999991
master_peak_2275	1	3958540	3958613	-2.10419	NA	3.313	0.999991
master_peak_2276	1	3961459	3961596	0.343322	NA	0.606793	0.999991
master_peak_2282	1	3968558	3968899	0.263547	0.902327	1.06107	0.999991
master_peak_2288	1	3982689	3982783	0.916998	NA	0.175521	0.999991
master_peak_2289	1	3982858	3982982	0.810817	NA	0.678457	0.999991
master_peak_2301	1	4004288	4004377	-2.61434	NA	3.14393	0.999991
master_peak_2304	1	4008386	4008467	1.3773	NA	-0.00036026	0.999991
master_peak_2306	1	4008962	4008997	1.64545	NA	-1.76223	0.999991
master_peak_2308	1	4012026	4012137	1.60385	NA	-1.21022	0.999991
master_peak_2309	1	4012212	4012268	1.22698	NA	0.410484	0.999991
master_peak_2310	1	4014123	4014238	1.71088	NA	-0.678037	0.999991
master_peak_2311	1	4014291	4014334	0.141687	NA	0.24277	0.999991
master_peak_2314	1	4021118	4021213	1.26961	NA	-1.09637	0.999991
master_peak_2318	1	4029103	4029334	-0.0481566	0.984036	-0.546141	0.999991
master_peak_2321	1	4032695	4032775	1.21674	NA	-0.240709	0.999991
master_peak_2324	1	4037035	4037139	1.39127	NA	0.391594	0.999991
master_peak_2328	1	4041181	4041281	1.05735	NA	0.283814	0.999991
master_peak_2331	1	4042534	4042732	1.63056	NA	-0.552655	0.999991
master_peak_2332	1	4042802	4042868	2.49341	NA	0.205676	0.999991
master_peak_2341	1	4057407	4057484	0.581996	NA	0.4708	0.999991
master_peak_2345	1	4062427	4062469	1.04975	NA	-0.367511	0.999991
master_peak_2348	1	4064328	4064470	1.13121	NA	-0.765466	0.999991
master_peak_2351	1	4068702	4068779	1.45027	NA	-1.07876	0.999991
master_peak_2353	1	4075427	4075499	2.31827	NA	0.117292	0.999991
master_peak_2355	1	4080671	4080779	0.962539	NA	-0.406371	0.999991
master_peak_2358	1	4084138	4084171	0.131177	NA	-0.109064	0.999991
master_peak_2360	1	4088379	4088470	0.441413	NA	-1.45215	0.999991
master_peak_2364	1	4100053	4100389	0.131182	NA	-0.130822	0.999991
master_peak_2365	1	4104150	4104240	0.981281	NA	0.274527	0.999991
master_peak_2370	1	4113451	4113534	2.90498	NA	0.911891	0.999991
master_peak_2375	1	4124542	4124939	0.296769	0.870378	-0.243242	0.999991
master_peak_2376	1	4127159	4127392	2.14092	0.158027	-0.201131	0.999991
master_peak_2378	1	4132700	4132731	2.75312	NA	-0.949887	0.999991
master_peak_2379	1	4132961	4132992	0.510949	NA	1.41574	0.999991
master_peak_2380	1	4137906	4137999	3.35617	NA	-1.63839	0.999991
master_peak_2381	1	4141731	4141861	0.559013	NA	0.168645	0.999991
master_peak_2383	1	4145972	4146041	-0.936164	NA	0.982775	0.999991
master_peak_2388	1	4160089	4160152	1.91417	NA	-0.500485	0.999991
master_peak_2389	1	4160518	4160632	1.71374	NA	-0.910815	0.999991
master_peak_2390	1	4163240	4163313	2.47612	NA	-1.37382	0.999991
master_peak_2392	1	4164619	4164793	2.71847	0.0142038	0.0706198	0.999991
master_peak_2398	1	4171084	4171169	0.325812	NA	-0.180165	0.999991
master_peak_2402	1	4177620	4177729	2.16626	NA	0.767273	0.999991
master_peak_2404	1	4181204	4181263	1.2355	NA	-0.237242	0.999991
master_peak_2405	1	4185546	4185653	1.75678	NA	0.429881	0.999991
master_peak_2407	1	4187338	4187447	0.921551	NA	1.471	0.999991
master_peak_2409	1	4191548	4191616	2.58052	NA	-2.0891	0.999991
master_peak_2414	1	4199996	4200156	1.41798	NA	-0.471759	0.999991
master_peak_2418	1	4212245	4212299	0.170779	NA	-0.427495	0.999991
master_peak_2426	1	4236604	4236924	-0.212353	NA	-0.892581	0.999991
master_peak_2427	1	4238718	4238793	1.39596	NA	-1.97441	0.999991
master_peak_2428	1	4246242	4246345	1.62139	NA	0.652883	0.999991
master_peak_2432	1	4257133	4257299	-1.41815	NA	0.145678	0.999991
master_peak_2433	1	4257333	4257399	0.711718	NA	-1.06198	0.999991
master_peak_2439	1	4269703	4269764	0.380571	NA	2.11373	0.999991
master_peak_2440	1	4269888	4269972	-0.220926	NA	0.315637	0.999991
master_peak_2442	1	4271723	4271894	0.204597	NA	0.178586	0.999991
master_peak_2446	1	4281886	4282001	1.70159	NA	-0.373749	0.999991
master_peak_2448	1	4293411	4293477	-0.0796701	NA	0.697888	0.999991
master_peak_2449	1	4297962	4298034	0.0170282	NA	0.0896722	0.999991
master_peak_2452	1	4303510	4303763	0.975819	NA	-0.739542	0.999991
master_peak_2455	1	4307319	4307439	0.441583	NA	0.488291	0.999991
master_peak_2456	1	4309004	4309183	0.889188	NA	0.153881	0.999991
master_peak_2459	1	4313894	4314093	1.74435	NA	-0.484335	0.999991
master_peak_2460	1	4316163	4316286	-0.013703	NA	-0.653066	0.999991
master_peak_2463	1	4320547	4320585	0.0115349	NA	1.22943	0.999991
master_peak_2465	1	4323637	4323805	0.154297	NA	0.646092	0.999991
master_peak_2467	1	4328777	4329037	-0.388452	0.883341	1.02228	0.999991
master_peak_2474	1	4351374	4351589	-0.277665	NA	0.483158	0.999991
master_peak_2477	1	4366102	4366245	0.895475	NA	0.3891	0.999991
master_peak_2478	1	4371941	4371992	2.62591	NA	-1.14307	0.999991
master_peak_2480	1	4378657	4378707	-1.26468	NA	1.54338	0.999991
master_peak_2481	1	4378743	4378858	-1.00252	NA	3.86766	0.999991
master_peak_2484	1	4382396	4382604	0.353092	0.858117	-0.926456	0.999991
master_peak_2495	1	4407631	4407770	3.23757	NA	-0.197043	0.999991
master_peak_2496	1	4413009	4413101	0.0310738	NA	1.60479	0.999991
master_peak_2497	1	4413146	4413245	1.28212	NA	-0.549254	0.999991
master_peak_2499	1	4434261	4434791	2.39501	4.52562e-07	-0.416248	0.999991
master_peak_2500	1	4437272	4437376	-0.365422	NA	0.196238	0.999991
master_peak_2501	1	4437480	4437557	-0.537834	NA	1.33559	0.999991
master_peak_2505	1	4443146	4443215	1.48985	NA	-1.30644	0.999991
master_peak_2507	1	4451887	4452439	-0.940836	0.203896	0.201397	0.999991
master_peak_2511	1	4453582	4453619	0.341531	NA	0.0219972	0.999991
master_peak_2512	1	4458699	4458787	1.60902	NA	0.576288	0.999991
master_peak_2513	1	4461440	4461510	1.631	NA	-2.047	0.999991
master_peak_2514	1	4463811	4463851	-0.326657	NA	1.92413	0.999991
master_peak_2516	1	4466174	4466262	1.50968	NA	-1.31963	0.999991
master_peak_2518	1	4477437	4477527	1.27801	NA	0.450913	0.999991
master_peak_2520	1	4480539	4480881	-0.477199	0.399881	-0.0908263	0.999991
master_peak_2522	1	4484512	4484649	0.405224	NA	-0.664028	0.999991
master_peak_2523	1	4484698	4484860	1.76622	0.138088	-1.27541	0.999991
master_peak_2528	1	4491764	4491799	1.17982	NA	-0.0634808	0.999991
master_peak_2529	1	4491842	4492153	-1.51049	0.190087	1.01756	0.999991
master_peak_2531	1	4498747	4498929	-0.161712	NA	-0.40532	0.999991
master_peak_2534	1	4502385	4502492	1.43347	NA	-0.385426	0.999991
master_peak_2535	1	4502624	4502869	-0.470273	0.761211	-0.898666	0.999991
master_peak_2537	1	4508043	4508126	1.93525	NA	-0.922954	0.999991
master_peak_2538	1	4508169	4508303	0.167833	0.94119	0.608939	0.999991
master_peak_2541	1	4510360	4510394	0.350695	NA	-0.0224131	0.999991
master_peak_2542	1	4512681	4513058	-0.0482626	0.984455	-0.805029	0.999991
master_peak_2545	1	4521274	4521343	-1.40971	NA	0.758269	0.999991
master_peak_2546	1	4522604	4522931	1.38566	0.248145	0.0174721	0.999991
master_peak_2547	1	4526551	4526604	0.995806	NA	-0.740405	0.999991
master_peak_2548	1	4528389	4528605	1.99217	0.0912206	0.348978	0.999991
master_peak_2549	1	4528716	4529159	1.90478	0.0314342	-0.207155	0.999991
master_peak_2553	1	4536800	4536886	-1.43566	NA	1.79124	0.999991
master_peak_2554	1	4538805	4539156	0.522925	0.756842	-1.39975	0.999991
master_peak_2555	1	4540435	4540491	0.142383	NA	0.222936	0.999991
master_peak_2559	1	4549084	4549171	1.40701	NA	-0.0183173	0.999991
master_peak_2563	1	4552708	4552921	-0.678629	0.558558	-0.719351	0.999991
master_peak_2568	1	4558582	4558639	-1.24047	NA	-0.819222	0.999991
master_peak_2569	1	4562257	4562350	-0.851659	0.603738	0.129077	0.999991
master_peak_2570	1	4563090	4563199	-1.03221	0.640548	0.574362	0.999991
master_peak_2574	1	4570266	4570498	-2.64436	0.0215622	0.216515	0.999991
master_peak_2576	1	4573871	4574136	0.00543357	0.997842	-0.691406	0.999991
master_peak_2579	1	4580986	4581249	-1.86023	0.0225088	0.388969	0.999991
master_peak_2582	1	4584629	4584803	-0.90121	0.627219	-0.322211	0.999991
master_peak_2584	1	4594862	4595003	0.591859	NA	0.683862	0.999991
master_peak_2585	1	4595555	4595776	-1.1232	NA	-0.177724	0.999991
master_peak_2586	1	4631017	4631118	-1.57765	NA	0.554209	0.999991
master_peak_2587	1	4634229	4634601	-1.6613	0.0674549	0.130917	0.999991
master_peak_2589	1	4637594	4637626	2.12361	NA	-0.36874	0.999991
master_peak_2592	1	4640339	4640454	0.528151	NA	0.329092	0.999991
master_peak_2596	1	4649042	4649156	-1.23235	NA	0.322231	0.999991
master_peak_2604	1	4667193	4667379	-0.764183	0.628306	0.202314	0.999991
master_peak_2605	1	4667999	4668089	-0.0739846	NA	0.276367	0.999991
master_peak_2606	1	4670054	4670201	-0.547197	0.712516	-0.0844696	0.999991
master_peak_2613	1	4681146	4681253	-1.48777	NA	1.35487	0.999991
master_peak_2615	1	4683595	4683848	-1.76693	0.16219	0.465406	0.999991
master_peak_2621	1	4696543	4696609	0.0954769	NA	-0.910662	0.999991
master_peak_2624	1	4698811	4698938	0.883847	0.663926	0.553995	0.999991
master_peak_2625	1	4701332	4701388	-1.7005	NA	1.10525	0.999991
master_peak_2626	1	4704612	4704832	-1.41734	0.00656664	0.419941	0.999991
master_peak_2629	1	4710171	4710510	-1.29755	0.213068	-0.0935434	0.999991
master_peak_2631	1	4716493	4716606	1.21979	NA	-0.423308	0.999991
master_peak_2634	1	4720272	4720442	-0.27977	NA	0.180085	0.999991
master_peak_2636	1	4720806	4720900	1.09867	NA	0.616446	0.999991
master_peak_2637	1	4724594	4724721	-1.13261	0.304831	-0.330234	0.999991
master_peak_2640	1	4735760	4735962	-1.05027	NA	1.84099	0.999991
master_peak_2644	1	4739493	4739616	-1.70327	0.231227	0.939156	0.999991
master_peak_2645	1	4741182	4741393	0.047746	NA	-0.439311	0.999991
master_peak_2650	1	4752072	4752212	-0.404965	NA	0.398049	0.999991
master_peak_2651	1	4754656	4754842	-0.0806606	NA	0.15898	0.999991
master_peak_2652	1	4755161	4755217	1.39783	NA	-1.18244	0.999991
master_peak_2653	1	4757187	4757589	-0.0603837	0.975841	-0.188152	0.999991
master_peak_2654	1	4757888	4758135	-0.0301002	0.990159	-0.351017	0.999991
master_peak_2655	1	4759310	4759410	-1.89646	NA	0.12955	0.999991
master_peak_2656	1	4760132	4760268	-1.42154	NA	0.800959	0.999991
master_peak_2657	1	4761571	4761680	2.70764	NA	-1.79046	0.999991
master_peak_2658	1	4764662	4764740	0.155597	NA	0.042329	0.999991
master_peak_2659	1	4767800	4767990	-0.0228516	0.991123	1.13726	0.999991
master_peak_2660	1	4770507	4770759	-0.915884	0.633057	-1.32397	0.999991
master_peak_2661	1	4773040	4773186	0.469805	NA	0.645383	0.999991
master_peak_2662	1	4775308	4775486	-0.505892	NA	0.401588	0.999991
master_peak_2665	1	4780302	4780499	-2.53786	NA	0.631397	0.999991
master_peak_2668	1	4786807	4787042	-1.3086	0.468053	0.0232134	0.999991
master_peak_2670	1	4787940	4788110	-0.473996	0.84164	1.37448	0.999991
master_peak_2671	1	4789202	4789395	2.25016	0.0769979	0.151789	0.999991
master_peak_2672	1	4792198	4792673	2.62988	1.78629e-05	-0.226196	0.999991
master_peak_2675	1	4797517	4797633	0.735311	NA	-0.10143	0.999991
master_peak_2677	1	4799431	4799657	-2.39374	0.137291	0.444481	0.999991
master_peak_2679	1	4804208	4804328	0.232183	NA	-0.322933	0.999991
master_peak_2680	1	4805186	4805294	1.59927	NA	-0.125467	0.999991
master_peak_2681	1	4805442	4805763	-0.525833	0.771782	0.231328	0.999991
master_peak_2684	1	4809619	4809722	0.219799	NA	0.821484	0.999991
master_peak_2685	1	4811806	4811922	0.699981	NA	-1.61647	0.999991
master_peak_2686	1	4812130	4812258	0.700389	NA	-0.774393	0.999991
master_peak_2688	1	4814191	4814268	-1.03176	NA	-0.413866	0.999991
master_peak_2691	1	4815898	4816016	-0.718556	NA	-0.377743	0.999991
master_peak_2693	1	4816191	4816270	-0.861645	NA	0.769746	0.999991
master_peak_2697	1	4821849	4821930	-0.6789	NA	1.74585	0.999991
master_peak_2698	1	4823987	4824141	-0.859468	NA	-0.226009	0.999991
master_peak_2700	1	4826439	4826626	-1.17179	0.37317	-1.4616	0.999991
master_peak_2703	1	4830698	4830773	-0.284282	NA	1.29676	0.999991
master_peak_2704	1	4830977	4831034	0.306966	NA	0.198123	0.999991
master_peak_2706	1	4836117	4836273	0.258255	NA	-0.0485476	0.999991
master_peak_2707	1	4838630	4838702	0.47796	NA	-0.418139	0.999991
master_peak_2708	1	4838919	4838992	1.35368	NA	0.0626431	0.999991
master_peak_2710	1	4842802	4842942	0.693689	NA	-1.21115	0.999991
master_peak_2712	1	4844725	4844839	-2.79232	NA	0.753205	0.999991
master_peak_2716	1	4847772	4847955	1.05274	NA	-1.3577	0.999991
master_peak_2717	1	4850440	4850497	-1.09818	NA	1.48931	0.999991
master_peak_2718	1	4850541	4850630	-0.245834	NA	0.782599	0.999991
master_peak_2719	1	4851117	4851320	-0.482645	0.834529	1.36481	0.999991
master_peak_2720	1	4854029	4854146	-0.80267	NA	0.544881	0.999991
master_peak_2724	1	4858730	4858838	-0.327834	NA	-0.588101	0.999991
master_peak_2725	1	4864903	4865017	-1.52898	NA	-0.926776	0.999991
master_peak_2729	1	4873304	4873471	-0.0970534	NA	1.0853	0.999991
master_peak_2732	1	4880737	4880899	-1.21453	NA	-2.00096	0.999991
master_peak_2734	1	4886702	4886889	1.02833	0.629919	-0.180171	0.999991
master_peak_2738	1	4895737	4896000	0.836591	0.679904	-0.372503	0.999991
master_peak_2739	1	4899139	4899228	-0.185482	NA	0.796109	0.999991
master_peak_2741	1	4903393	4903561	1.87058	NA	0.747724	0.999991
master_peak_2742	1	4908224	4908411	1.03946	NA	-0.0190455	0.999991
master_peak_2744	1	4909041	4909182	-1.2569	NA	0.836658	0.999991
master_peak_2746	1	4910356	4910406	-2.93123	NA	3.61925	0.999991
master_peak_2748	1	4913771	4913847	1.0405	NA	0.0818892	0.999991
master_peak_2749	1	4916139	4916232	-0.607655	NA	-1.14789	0.999991
master_peak_2750	1	4918234	4918441	1.17387	0.434871	-0.504634	0.999991
master_peak_2752	1	4921917	4921976	0.489843	NA	-0.396521	0.999991
master_peak_2753	1	4922203	4922365	0.716968	NA	-0.192693	0.999991
master_peak_2754	1	4922422	4922470	-2.84047	NA	2.54425	0.999991
master_peak_2755	1	4922506	4922586	-4.29759	NA	1.52785	0.999991
master_peak_2756	1	4925049	4925289	1.31503	NA	-0.415773	0.999991
master_peak_2758	1	4925439	4925492	-0.379411	NA	0.839222	0.999991
master_peak_2761	1	4929596	4929655	1.00066	NA	-0.242409	0.999991
master_peak_2762	1	4933239	4933342	-1.06761	NA	1.68586	0.999991
master_peak_2764	1	4934073	4934227	-0.422406	NA	0.504456	0.999991
master_peak_2765	1	4936408	4936581	0.746521	NA	-0.246838	0.999991
master_peak_2766	1	4938891	4938951	-0.04358	NA	-0.0160481	0.999991
master_peak_2767	1	4938996	4939269	0.812605	0.602249	-0.454782	0.999991
master_peak_2773	1	4945056	4945094	0.497393	NA	0.180875	0.999991
master_peak_2775	1	4947594	4947631	-1.4549	NA	1.93834	0.999991
master_peak_2777	1	4948589	4948655	-1.47215	NA	2.24785	0.999991
master_peak_2780	1	4955106	4955201	-1.39129	NA	-1.43331	0.999991
master_peak_2781	1	4955290	4955402	0.30746	NA	-0.0222947	0.999991
master_peak_2784	1	4960636	4960918	0.618014	0.742381	-0.341075	0.999991
master_peak_2785	1	4962002	4962111	0.417625	NA	-1.54075	0.999991
master_peak_2786	1	4962172	4962216	-0.778843	NA	0.0281341	0.999991
master_peak_2787	1	4963574	4963665	-0.253642	NA	0.10737	0.999991
master_peak_2788	1	4963715	4963958	0.19674	0.924982	-0.141449	0.999991
master_peak_2789	1	4966389	4966485	-2.22617	NA	1.31417	0.999991
master_peak_2791	1	4969973	4970039	-1.33251	NA	2.33558	0.999991
master_peak_2792	1	4972413	4972445	-0.654741	NA	-0.462348	0.999991
master_peak_2793	1	4973920	4974090	0.261393	NA	-0.488876	0.999991
master_peak_2795	1	4977556	4977624	0.13841	NA	-0.437	0.999991
master_peak_2798	1	4983216	4983433	0.024927	NA	-0.860667	0.999991
master_peak_2799	1	4983477	4983546	1.79983	NA	0.208681	0.999991
master_peak_2801	1	4986549	4986784	-0.13272	NA	-0.87154	0.999991
master_peak_2802	1	4988126	4988255	0.26515	NA	-0.284548	0.999991
master_peak_2803	1	4988291	4988530	1.21989	NA	0.00986501	0.999991
master_peak_2804	1	4989077	4989132	1.00696	NA	-0.0313594	0.999991
master_peak_2805	1	4991436	4991960	0.924526	0.287232	-0.44965	0.999991
master_peak_2806	1	4997078	4997385	-1.21697	0.125291	-0.465771	0.999991
master_peak_2807	1	4997639	4997898	-1.12864	0.546225	-0.637001	0.999991
master_peak_2810	1	5001449	5001685	-0.536208	0.787744	-0.138176	0.999991
master_peak_2811	1	5004523	5004833	0.838698	0.584473	0.696301	0.999991
master_peak_2812	1	5006579	5006982	-1.76874	0.233813	-0.0689134	0.999991
master_peak_2813	1	5011777	5012244	-1.93185	0.00970043	-0.588786	0.999991
master_peak_2816	1	5017071	5017266	-1.12224	0.455444	-0.961719	0.999991
master_peak_2818	1	5023497	5023744	0.140632	0.957997	-0.255644	0.999991
master_peak_2822	1	5030817	5030882	-0.546697	NA	1.03745	0.999991
master_peak_2824	1	5035885	5036016	-0.754406	NA	-1.49232	0.999991
master_peak_2830	1	5041883	5041938	-0.311571	NA	1.39898	0.999991
master_peak_2831	1	5045269	5045326	1.0085	NA	-0.579357	0.999991
master_peak_2833	1	5054171	5054407	-1.53133	0.441977	0.336147	0.999991
master_peak_2834	1	5059087	5059160	-0.63165	NA	-0.365588	0.999991
master_peak_2836	1	5065973	5066281	-0.335538	0.70527	-0.545098	0.999991
master_peak_2837	1	5068326	5068562	-1.31403	0.22768	-2.03432	0.999991
master_peak_2838	1	5068994	5069088	-2.20434	NA	0.31606	0.999991
master_peak_2844	1	5085295	5085390	0.71957	NA	0.829604	0.999991
master_peak_2847	1	5088426	5088533	0.0635885	NA	0.288244	0.999991
master_peak_2851	1	5101101	5101230	0.208255	NA	-0.306029	0.999991
master_peak_2857	1	5115249	5115426	-0.46139	NA	-0.959578	0.999991
master_peak_2861	1	5121295	5121474	-1.11907	0.560524	-0.417037	0.999991
master_peak_2863	1	5124288	5124615	-2.31937	0.0573437	1.02587	0.999991
master_peak_2866	1	5129683	5129910	0.706782	0.726852	-1.02012	0.999991
master_peak_2867	1	5132937	5133026	-0.404356	NA	-2.48339	0.999991
master_peak_2868	1	5133145	5133231	-0.799918	NA	-1.33579	0.999991
master_peak_2873	1	5145490	5145630	2.11059	NA	0.101532	0.999991
master_peak_2875	1	5149043	5149278	-0.986337	NA	1.42264	0.999991
master_peak_2877	1	5150964	5151064	0.506735	NA	0.835063	0.999991
master_peak_2878	1	5151333	5151501	0.811412	NA	-0.0336495	0.999991
master_peak_2880	1	5153511	5153804	1.20086	0.386618	-1.19393	0.999991
master_peak_2882	1	5155643	5155842	-0.9598	NA	-0.363343	0.999991
master_peak_2889	1	5168869	5169138	-0.661224	0.803047	-1.34785	0.999991
master_peak_2891	1	5172653	5172708	0.495636	NA	-0.442523	0.999991
master_peak_2893	1	5175085	5175172	0.56365	NA	-0.368099	0.999991
master_peak_2898	1	5184609	5184705	-1.78087	NA	1.58168	0.999991
master_peak_2900	1	5191345	5191396	1.35133	NA	-1.42888	0.999991
master_peak_2901	1	5193463	5193833	1.96348	0.209927	-0.120194	0.999991
master_peak_2902	1	5194040	5194079	-0.942334	NA	1.35726	0.999991
master_peak_2903	1	5194126	5194225	1.11038	NA	0.15435	0.999991
master_peak_2905	1	5195675	5195867	0.895762	0.670026	0.479444	0.999991
master_peak_2907	1	5200115	5200198	0.880379	NA	-1.18197	0.999991
master_peak_2908	1	5200235	5200493	2.47115	0.0763483	-0.281127	0.999991
master_peak_2909	1	5203110	5203370	-0.892431	0.345548	-0.154056	0.999991
master_peak_2910	1	5203638	5203754	-1.0567	NA	0.123683	0.999991
master_peak_2914	1	5214805	5215067	2.06907	0.0852206	-0.132359	0.999991
master_peak_2921	1	5229022	5229091	-0.108971	NA	0.116367	0.999991
master_peak_2924	1	5234495	5234558	0.984598	NA	-1.2988	0.999991
master_peak_2925	1	5236525	5236862	-1.43759	0.322247	0.80203	0.999991
master_peak_2926	1	5238873	5238929	0.694533	NA	-0.138419	0.999991
master_peak_2927	1	5239014	5239193	-1.43482	0.48226	-0.471612	0.999991
master_peak_2928	1	5241605	5241909	-2.07457	0.0695446	0.723635	0.999991
master_peak_2931	1	5245825	5245974	0.701857	NA	-1.3363	0.999991
master_peak_2933	1	5248239	5248390	1.41777	NA	-0.381364	0.999991
master_peak_2934	1	5248538	5248728	-0.822475	NA	-1.16052	0.999991
master_peak_2936	1	5252921	5253042	-1.46003	NA	0.167115	0.999991
master_peak_2939	1	5255071	5255369	-0.786893	0.563814	-0.559302	0.999991
master_peak_2943	1	5258584	5258662	0.910275	NA	-2.04922	0.999991
master_peak_2945	1	5262938	5262992	-1.82136	NA	2.33723	0.999991
master_peak_2946	1	5263047	5263247	0.603281	NA	0.515173	0.999991
master_peak_2948	1	5265402	5265552	0.640244	NA	-0.0164975	0.999991
master_peak_2952	1	5271760	5271903	0.195172	NA	-0.386906	0.999991
master_peak_2955	1	5277454	5277625	0.0596786	NA	0.616843	0.999991
master_peak_2958	1	5284689	5284788	0.142074	NA	-0.351073	0.999991
master_peak_2959	1	5285093	5285289	1.86506	0.100917	-2.40589	0.999991
master_peak_2962	1	5290314	5290476	-1.09191	NA	1.26323	0.999991
master_peak_2966	1	5313039	5313260	-0.163978	0.951166	-1.03255	0.999991
master_peak_2969	1	5316892	5317043	-1.55518	0.153378	-0.459746	0.999991
master_peak_2971	1	5318295	5318343	2.36379	NA	-0.606726	0.999991
master_peak_2973	1	5320556	5320663	-1.42773	NA	-0.207239	0.999991
master_peak_2978	1	5326898	5327028	-2.12914	NA	0.294673	0.999991
master_peak_2979	1	5333414	5333472	0.378733	NA	0.0982923	0.999991
master_peak_2982	1	5335146	5335196	0.922543	NA	-0.710262	0.999991
master_peak_2984	1	5338291	5338413	-0.0127175	NA	-0.56305	0.999991
master_peak_2986	1	5338699	5338732	1.42096	NA	-0.353857	0.999991
master_peak_2987	1	5339362	5339441	1.43204	NA	-0.799096	0.999991
master_peak_2991	1	5345530	5345681	-0.276459	0.932411	0.442901	0.999991
master_peak_2992	1	5346044	5346103	0.293569	NA	0.0273954	0.999991
master_peak_2994	1	5350599	5350670	0.139176	NA	-0.136635	0.999991
master_peak_2996	1	5352329	5352397	-0.25335	NA	-0.224963	0.999991
master_peak_2998	1	5362508	5362630	1.01813	NA	-1.06105	0.999991
master_peak_3000	1	5366719	5366957	-0.616139	0.738729	-0.159376	0.999991
master_peak_3002	1	5369151	5369263	1.16817	NA	-0.409259	0.999991
master_peak_3003	1	5370696	5370889	-0.805259	NA	0.49279	0.999991
master_peak_3010	1	5380244	5380290	3.18961	NA	0.67892	0.999991
master_peak_3015	1	5387007	5387194	-0.348093	0.835833	-0.179333	0.999991
master_peak_3016	1	5387317	5387443	1.22477	NA	0.266195	0.999991
master_peak_3017	1	5387936	5388040	-0.705207	NA	0.160178	0.999991
master_peak_3018	1	5391215	5391328	0.669468	NA	-1.19328	0.999991
master_peak_3019	1	5393942	5394013	1.41023	NA	0.299594	0.999991
master_peak_3020	1	5395835	5395980	-0.160047	NA	0.546653	0.999991
master_peak_3027	1	5406515	5406633	-0.848265	NA	-0.390051	0.999991
master_peak_3028	1	5407922	5408123	0.508027	NA	-0.795472	0.999991
master_peak_3029	1	5408207	5408285	0.886895	NA	-0.607335	0.999991
master_peak_3030	1	5409762	5409921	1.25696	NA	-0.429261	0.999991
master_peak_3034	1	5421292	5421441	0.185009	NA	-0.611914	0.999991
master_peak_3035	1	5423798	5424054	-1.05295	0.557963	0.921249	0.999991
master_peak_3037	1	5426898	5427164	-1.52546	0.012835	0.0793379	0.999991
master_peak_3038	1	5427206	5427343	0.0870032	NA	0.687772	0.999991
master_peak_3044	1	5437242	5437433	-0.724474	0.294383	-0.0236781	0.999991
master_peak_3046	1	5442155	5442324	-2.3912	0.000318807	0.308413	0.999991
master_peak_3050	1	5452083	5452193	0.404794	NA	-1.67902	0.999991
master_peak_3055	1	5456542	5456623	-1.05031	NA	1.13744	0.999991
master_peak_3056	1	5456663	5456743	0.341584	NA	-0.228135	0.999991
master_peak_3057	1	5463653	5463782	-0.791376	0.710038	0.318917	0.999991
master_peak_3058	1	5463875	5464305	-1.29982	0.0561599	0.747609	0.999991
master_peak_3061	1	5470627	5470911	0.703754	0.643621	-0.333061	0.999991
master_peak_3062	1	5471120	5471244	-0.456686	NA	1.54978	0.999991
master_peak_3064	1	5473740	5474107	-1.05015	0.27565	0.169465	0.999991
master_peak_3068	1	5484604	5484730	0.187226	NA	0.51969	0.999991
master_peak_3072	1	5498339	5498469	1.88789	NA	-0.734434	0.999991
master_peak_3076	1	5505452	5505593	-0.35139	NA	-0.0026704	0.999991
master_peak_3077	1	5506300	5506374	-0.681669	NA	-0.135979	0.999991
master_peak_3078	1	5506489	5506558	0.811465	NA	-1.19272	0.999991
master_peak_3084	1	5511960	5512291	0.633201	NA	-0.662945	0.999991
master_peak_3089	1	5519255	5519428	0.25081	NA	-1.13159	0.999991
master_peak_3090	1	5523085	5523214	-0.770488	0.603391	1.05981	0.999991
master_peak_3091	1	5523880	5523955	3.55444	NA	1.15891	0.999991
master_peak_3092	1	5524099	5524155	0.0190099	NA	0.558574	0.999991
master_peak_3093	1	5524333	5524402	-0.694567	NA	2.20361	0.999991
master_peak_3097	1	5528730	5528962	-1.33722	NA	2.02176	0.999991
master_peak_3100	1	5545995	5546197	-0.630277	0.739452	0.39738	0.999991
master_peak_3101	1	5546353	5546394	1.68543	NA	-1.88913	0.999991
master_peak_3106	1	5549892	5550016	-1.04146	NA	2.30932	0.999991
master_peak_3107	1	5553825	5553903	-1.28642	NA	-2.85826	0.999991
master_peak_3108	1	5555147	5555254	1.16957	NA	0.298384	0.999991
master_peak_3114	1	5564075	5564137	0.781116	NA	-2.11018	0.999991
master_peak_3115	1	5568785	5568887	0.454032	NA	1.09975	0.999991
master_peak_3118	1	5574057	5574184	1.07331	NA	-0.110525	0.999991
master_peak_3119	1	5574297	5574338	-0.0887092	NA	1.3784	0.999991
master_peak_3122	1	5578556	5579077	-1.19085	0.0774796	0.286214	0.999991
master_peak_3127	1	5586394	5586641	0.53206	0.593561	-1.0458	0.999991
master_peak_3128	1	5588996	5589247	-2.47864	0.00284151	0.440965	0.999991
master_peak_3133	1	5600362	5600613	-0.371362	0.853988	-0.754548	0.999991
master_peak_3134	1	5605298	5605517	-1.30084	0.501632	-0.402569	0.999991
master_peak_3135	1	5608717	5608880	0.892046	NA	-0.192124	0.999991
master_peak_3137	1	5610690	5610759	-0.245786	NA	0.519611	0.999991
master_peak_3138	1	5615513	5615813	2.28844	0.00229303	0.73963	0.999991
master_peak_3139	1	5617289	5617420	0.793938	NA	-0.253778	0.999991
master_peak_3142	1	5622929	5623157	1.15186	0.323723	0.384607	0.999991
master_peak_3144	1	5625923	5626001	1.95368	NA	-0.29018	0.999991
master_peak_3146	1	5628431	5628537	0.631697	NA	0.308163	0.999991
master_peak_3147	1	5628752	5628936	-0.479137	0.808466	-0.255489	0.999991
master_peak_3150	1	5634090	5634644	-1.10961	0.193605	0.256706	0.999991
master_peak_3151	1	5636424	5636702	-0.0802249	0.970367	0.955022	0.999991
master_peak_3152	1	5638978	5639083	0.226789	NA	-0.0652578	0.999991
master_peak_3155	1	5643828	5643931	1.23638	NA	-1.14531	0.999991
master_peak_3156	1	5646786	5646880	0.774891	NA	-0.878411	0.999991
master_peak_3157	1	5646962	5647018	-1.60387	NA	-0.0581528	0.999991
master_peak_3168	1	5658167	5658259	0.849299	NA	1.02786	0.999991
master_peak_3170	1	5659220	5659282	-0.312427	NA	0.361486	0.999991
master_peak_3171	1	5659875	5660001	-0.500227	NA	0.0795794	0.999991
master_peak_3176	1	5676251	5676549	-1.10604	0.338631	-0.14542	0.999991
master_peak_3179	1	5684291	5684413	2.12032	NA	-0.560041	0.999991
master_peak_3190	1	5704040	5704385	-1.52364	0.0337252	-0.918821	0.999991
master_peak_3191	1	5707206	5707289	-0.00842271	NA	-0.219152	0.999991
master_peak_3194	1	5710223	5710651	0.402814	0.723959	0.269794	0.999991
master_peak_3201	1	5718454	5718548	-0.523659	NA	0.585281	0.999991
master_peak_3202	1	5720319	5720562	0.193198	0.90832	1.53407	0.999991
master_peak_3203	1	5725159	5725417	-1.74979	0.0873313	0.41603	0.999991
master_peak_3206	1	5731491	5731571	-0.526762	NA	0.966849	0.999991
master_peak_3214	1	5750605	5750755	0.0245501	NA	-0.973121	0.999991
master_peak_3215	1	5750914	5750995	3.40081	NA	-0.527959	0.999991
master_peak_3218	1	5755918	5755990	-2.95408	NA	1.50258	0.999991
master_peak_3219	1	5756029	5756164	2.27536	NA	-0.191947	0.999991
master_peak_3220	1	5759222	5759420	-0.304651	NA	-1.05218	0.999991
master_peak_3221	1	5762639	5762919	-0.384058	0.836755	0.361619	0.999991
master_peak_3226	1	5768021	5768176	0.298816	0.893828	-0.158098	0.999991
master_peak_3229	1	5771138	5771226	-0.303096	NA	0.146593	0.999991
master_peak_3230	1	5771580	5771631	1.55903	NA	-0.0938383	0.999991
master_peak_3232	1	5773424	5773758	0.568022	0.694488	0.322476	0.999991
master_peak_3234	1	5777207	5777331	0.117992	NA	-0.310726	0.999991
master_peak_3235	1	5781199	5781572	0.195693	0.918664	-0.845708	0.999991
master_peak_3236	1	5785558	5785672	1.36465	NA	-1.2601	0.999991
master_peak_3238	1	5786885	5786988	0.237514	NA	-0.173909	0.999991
master_peak_3240	1	5788172	5788290	0.40112	NA	-0.843693	0.999991
master_peak_3241	1	5788336	5788525	2.6889	0.0146495	-0.70195	0.999991
master_peak_3243	1	5795334	5795429	0.330081	0.838462	-0.0273782	0.999991
master_peak_3244	1	5796365	5796741	-0.608143	0.19369	0.0936888	0.999991
master_peak_3245	1	5797997	5798148	2.63666	0.00299669	-0.131953	0.999991
master_peak_3248	1	5808387	5808435	0.454733	NA	-1.4927	0.999991
master_peak_3250	1	5811116	5811192	-0.593443	NA	-2.12109	0.999991
master_peak_3252	1	5818662	5818975	2.91799	0.000715909	0.0863938	0.999991
master_peak_3254	1	5826178	5826682	0.863034	0.311538	-1.29566	0.999991
master_peak_3255	1	5829199	5829369	0.231508	NA	-0.213208	0.999991
master_peak_3260	1	5832989	5833100	1.12599	NA	-0.6524	0.999991
master_peak_3261	1	5838979	5839087	-1.97421	NA	2.64305	0.999991
master_peak_3262	1	5841592	5841892	0.7145	0.619186	-0.198572	0.999991
master_peak_3263	1	5849441	5849533	-0.508694	NA	3.6534	0.999991
master_peak_3267	1	5856014	5856066	-0.387537	NA	-1.03097	0.999991
master_peak_3268	1	5856123	5856239	0.231736	NA	-0.748626	0.999991
master_peak_3270	1	5858273	5858543	0.808367	0.603414	-0.481705	0.999991
master_peak_3271	1	5862403	5862538	-0.0745794	NA	-1.57381	0.999991
master_peak_3272	1	5863585	5863753	0.630472	NA	-1.43289	0.999991
master_peak_3273	1	5863794	5863980	1.24171	NA	-0.533893	0.999991
master_peak_3275	1	5867490	5867573	0.526446	NA	0.311356	0.999991
master_peak_3276	1	5870023	5870098	-0.0829317	NA	0.414777	0.999991
master_peak_3277	1	5870327	5870571	-1.15956	NA	0.599972	0.999991
master_peak_3281	1	5882943	5883199	-1.81923	0.0642468	-0.4124	0.999991
master_peak_3284	1	5887127	5887381	1.05415	NA	0.491806	0.999991
master_peak_3290	1	5898671	5899004	-0.0128673	0.995521	0.142724	0.999991
master_peak_3291	1	5899156	5899247	-0.707273	NA	0.181818	0.999991
master_peak_3296	1	5903131	5903249	0.331937	NA	-0.567114	0.999991
master_peak_3299	1	5907488	5907574	-0.199642	NA	-0.215116	0.999991
master_peak_3300	1	5909586	5909926	0.556455	0.680176	-0.0959063	0.999991
master_peak_3301	1	5913376	5913805	-2.67832	4.02913e-05	-0.891153	0.999991
master_peak_3302	1	5917707	5917872	-0.597834	NA	-0.339176	0.999991
master_peak_3304	1	5920078	5920353	2.27788	0.0142179	-0.240676	0.999991
master_peak_3305	1	5922162	5922277	0.849591	NA	-1.61019	0.999991
master_peak_3306	1	5926922	5927016	-0.405303	NA	1.23933	0.999991
master_peak_3307	1	5927142	5927547	1.98465	0.000589922	-0.19881	0.999991
master_peak_3308	1	5929560	5929874	0.504124	0.739027	0.127847	0.999991
master_peak_3309	1	5929926	5929993	1.07667	NA	0.631163	0.999991
master_peak_3312	1	5936371	5936510	-0.225645	NA	0.388076	0.999991
master_peak_3314	1	5940124	5940425	1.21701	0.584354	0.203573	0.999991
master_peak_3315	1	5941338	5941458	-0.683243	0.694675	0.0287245	0.999991
master_peak_3318	1	5942276	5942536	-0.798424	0.636346	0.013631	0.999991
master_peak_3321	1	5943315	5943370	0.853855	NA	-0.55996	0.999991
master_peak_3324	1	5948253	5948370	0.907755	NA	-0.533731	0.999991
master_peak_3325	1	5948484	5948609	-0.683243	0.774744	0.0962744	0.999991
master_peak_3328	1	5949018	5949119	1.39715	NA	0.0513094	0.999991
master_peak_3329	1	5949908	5949944	-0.179451	NA	2.69311	0.999991
master_peak_3331	1	5950712	5950781	0.901516	NA	-0.83243	0.999991
master_peak_3332	1	5955135	5955360	0.416313	0.79095	-0.943463	0.999991
master_peak_3335	1	5959577	5959670	1.21329	NA	-0.107399	0.999991
master_peak_3336	1	5959704	5959833	-0.67916	NA	1.12045	0.999991
master_peak_3344	1	5969303	5969395	-0.660152	NA	0.214151	0.999991
master_peak_3345	1	5969561	5969711	0.942522	NA	-0.532564	0.999991
master_peak_3347	1	5970188	5970276	-0.592557	NA	0.382835	0.999991
master_peak_3348	1	5996896	5996968	2.21577	NA	-0.0210469	0.999991
master_peak_3350	1	5998027	5998083	0.43459	NA	0.362342	0.999991
master_peak_3353	1	6004418	6004496	2.92699	NA	-0.128355	0.999991
master_peak_3355	1	6006653	6006774	-0.832903	NA	1.31779	0.999991
master_peak_3360	1	6010938	6011129	-0.622829	NA	0.726183	0.999991
master_peak_3362	1	6014212	6014526	0.999781	0.594974	-0.768087	0.999991
master_peak_3363	1	6017780	6017831	-0.971841	NA	0.273921	0.999991
master_peak_3367	1	6023380	6023483	0.901176	NA	1.85666	0.999991
master_peak_3370	1	6031782	6031849	0.594473	NA	-1.37603	0.999991
master_peak_3372	1	6033866	6033931	0.272162	NA	0.257779	0.999991
master_peak_3375	1	6036927	6037081	-0.0724054	NA	0.97618	0.999991
master_peak_3378	1	6039729	6039848	-2.69288	NA	1.55252	0.999991
master_peak_3384	1	6044204	6044311	1.30058	NA	-0.898896	0.999991
master_peak_3386	1	6047604	6047735	0.441759	NA	0.305824	0.999991
master_peak_3387	1	6047835	6047988	-0.00677956	NA	-0.917793	0.999991
master_peak_3388	1	6050282	6050472	1.04459	NA	-0.141965	0.999991
master_peak_3389	1	6055656	6055711	1.49136	NA	0.0815454	0.999991
master_peak_3394	1	6063448	6063632	-0.468326	NA	0.92829	0.999991
master_peak_3395	1	6066413	6066522	-1.37496	NA	2.66025	0.999991
master_peak_3398	1	6071048	6071120	-0.506086	NA	0.324483	0.999991
master_peak_3399	1	6072795	6072882	1.75713	NA	-0.539321	0.999991
master_peak_3400	1	6072955	6073016	-0.949272	NA	1.08787	0.999991
master_peak_3403	1	6076772	6076985	0.285018	NA	0.280798	0.999991
master_peak_3405	1	6081365	6081537	0.855072	NA	1.02449	0.999991
master_peak_3406	1	6081571	6081642	0.328698	NA	0.456577	0.999991
master_peak_3408	1	6084495	6084573	0.931368	NA	-0.669501	0.999991
master_peak_3410	1	6090348	6090443	0.744368	NA	-0.0342174	0.999991
master_peak_3411	1	6094464	6094690	-0.219215	NA	0.164154	0.999991
master_peak_3413	1	6103298	6103343	1.72814	NA	-0.216698	0.999991
master_peak_3417	1	6109068	6109285	-0.0680229	0.982983	-1.41833	0.999991
master_peak_3420	1	6118951	6119010	1.43447	NA	-0.0974072	0.999991
master_peak_3421	1	6124482	6124635	-0.332992	NA	-1.29391	0.999991
master_peak_3422	1	6127416	6127509	1.61031	NA	0.226646	0.999991
master_peak_3423	1	6130238	6130295	0.722721	NA	-0.614599	0.999991
master_peak_3426	1	6139237	6139450	0.619252	NA	-0.218422	0.999991
master_peak_3429	1	6146327	6146409	0.4745	NA	-0.56118	0.999991
master_peak_3433	1	6149094	6149177	0.225676	NA	-1.10391	0.999991
master_peak_3437	1	6157512	6157656	-0.44243	NA	0.917866	0.999991
master_peak_3438	1	6158873	6158996	3.07171	0.0273332	0.386213	0.999991
master_peak_3441	1	6164352	6164498	0.663214	NA	-0.141885	0.999991
master_peak_3448	1	6171835	6171888	1.30913	NA	-0.0604916	0.999991
master_peak_3449	1	6174125	6174241	0.342531	NA	-0.33894	0.999991
master_peak_3454	1	6194979	6195044	1.25679	NA	0.489188	0.999991
master_peak_3456	1	6197279	6197375	-0.100368	NA	-0.393269	0.999991
master_peak_3457	1	6199612	6199669	2.31891	NA	-0.144201	0.999991
master_peak_3459	1	6202901	6203058	0.587544	0.78217	-0.589352	0.999991
master_peak_3460	1	6203837	6203904	5.12664	NA	0.177921	0.999991
master_peak_3461	1	6204213	6204290	0.630397	NA	-0.188417	0.999991
master_peak_3462	1	6205251	6205333	0.519787	NA	-0.449779	0.999991
master_peak_3468	1	6223129	6223258	1.41314	NA	-0.476781	0.999991
master_peak_3472	1	6233435	6233469	-0.00534507	NA	-1.36898	0.999991
master_peak_3476	1	6240693	6240970	0.995758	0.603126	-0.289278	0.999991
master_peak_3478	1	6247843	6248204	2.23466	0.0161444	-0.425448	0.999991
master_peak_3480	1	6250702	6250786	1.46277	NA	-0.350661	0.999991
master_peak_3487	1	6259596	6259687	-0.445241	NA	1.74288	0.999991
master_peak_3490	1	6268786	6268995	0.425032	NA	-0.238855	0.999991
master_peak_3495	1	6275179	6275287	0.994892	NA	-1.51417	0.999991
master_peak_3499	1	6284655	6284998	2.36795	0.00180241	0.0229965	0.999991
master_peak_3500	1	6285359	6285433	-0.29658	NA	0.874269	0.999991
master_peak_3502	1	6290197	6290271	0.562349	NA	-1.44975	0.999991
master_peak_3503	1	6290338	6290416	-0.369575	NA	0.613522	0.999991
master_peak_3506	1	6293313	6293363	1.42283	NA	-1.37996	0.999991
master_peak_3509	1	6299056	6299151	0.344499	NA	0.502125	0.999991
master_peak_3518	1	6310044	6310129	1.45053	NA	-0.261585	0.999991
master_peak_3519	1	6313372	6313580	0.597481	NA	-0.173638	0.999991
master_peak_3528	1	6336922	6336998	-0.39468	NA	0.178799	0.999991
master_peak_3530	1	6339255	6339293	0.560458	NA	-1.10121	0.999991
master_peak_3531	1	6339327	6339387	0.157362	NA	-0.376785	0.999991
master_peak_3537	1	6351558	6351597	3.20467	NA	-0.812577	0.999991
master_peak_3541	1	6354324	6354471	-0.217725	NA	0.110658	0.999991
master_peak_3544	1	6366493	6366542	3.53143	NA	-1.55229	0.999991
master_peak_3545	1	6366697	6366789	1.14824	NA	-0.316363	0.999991
master_peak_3550	1	6373717	6373810	0.799015	NA	-0.833524	0.999991
master_peak_3554	1	6377658	6377768	1.82835	NA	0.411114	0.999991
master_peak_3555	1	6380219	6380307	-0.338401	NA	1.88246	0.999991
master_peak_3556	1	6380539	6380590	-0.242053	NA	0.857692	0.999991
master_peak_3559	1	6385183	6385327	0.579849	NA	-0.109659	0.999991
master_peak_3560	1	6387409	6387498	-0.369694	NA	-0.185765	0.999991
master_peak_3561	1	6387933	6388023	1.71081	NA	0.208706	0.999991
master_peak_3567	1	6401350	6401592	-0.926382	0.493118	0.765783	0.999991
master_peak_3569	1	6403383	6403530	-0.616759	0.672695	-0.200563	0.999991
master_peak_3570	1	6404658	6404923	0.0319315	0.98211	-1.31962	0.999991
master_peak_3571	1	6408153	6408309	1.40581	0.390345	-0.258124	0.999991
master_peak_3576	1	6413589	6413770	-0.165572	NA	-0.0151068	0.999991
master_peak_3579	1	6417800	6417929	1.70184	NA	-0.32191	0.999991
master_peak_3582	1	6423348	6423465	0.981949	NA	-0.000576892	0.999991
master_peak_3584	1	6431286	6431412	1.08099	NA	0.353989	0.999991
master_peak_3585	1	6432625	6432757	0.235753	NA	-0.773228	0.999991
master_peak_3586	1	6437130	6437233	-0.0981801	NA	0.514404	0.999991
master_peak_3593	1	6442864	6442960	2.02671	NA	-1.15361	0.999991
master_peak_3595	1	6444950	6445041	1.76786	NA	-2.01937	0.999991
master_peak_3598	1	6455910	6456054	0.561227	NA	0.00958866	0.999991
master_peak_3603	1	6467242	6467377	1.60874	NA	0.069402	0.999991
master_peak_3604	1	6467431	6467551	1.79646	NA	-2.20567	0.999991
master_peak_3607	1	6469413	6469582	0.243248	NA	-0.653389	0.999991
master_peak_3612	1	6474376	6474439	0.00956974	NA	1.19139	0.999991
master_peak_3615	1	6477853	6477974	2.968	NA	0.236002	0.999991
master_peak_3619	1	6481584	6481663	0.805931	NA	0.0590435	0.999991
master_peak_3622	1	6483732	6483780	4.30084	NA	-1.02414	0.999991
master_peak_3627	1	6492608	6492655	0.00749774	NA	0.70717	0.999991
master_peak_3628	1	6492879	6492943	-0.0955579	NA	0.89037	0.999991
master_peak_3630	1	6497884	6498039	0.620573	NA	0.828062	0.999991
master_peak_3631	1	6498303	6498383	2.15151	NA	0.753397	0.999991
master_peak_3634	1	6501028	6501072	2.15766	NA	-1.35672	0.999991
master_peak_3636	1	6501619	6501682	1.34238	NA	-0.281803	0.999991
master_peak_3637	1	6503610	6503692	-0.060986	NA	0.392658	0.999991
master_peak_3640	1	6505884	6505975	1.65064	NA	0.283113	0.999991
master_peak_3649	1	6525974	6526200	-3.83184	NA	1.0062	0.999991
master_peak_3650	1	6527845	6527929	0.747401	NA	-0.195988	0.999991
master_peak_3668	1	6551964	6552018	0.194607	NA	0.633198	0.999991
master_peak_3669	1	6552127	6552238	2.45312	NA	-0.999069	0.999991
master_peak_3673	1	6556086	6556158	2.57803	NA	-1.50396	0.999991
master_peak_3674	1	6556251	6556494	-0.0157753	0.995241	0.622918	0.999991
master_peak_3677	1	6557914	6558030	-0.590258	NA	-0.0701271	0.999991
master_peak_3680	1	6566741	6566981	1.03485	0.425483	-0.76345	0.999991
master_peak_3683	1	6576237	6576421	0.474992	NA	0.396561	0.999991
master_peak_3687	1	6585875	6586015	0.624076	NA	0.847549	0.999991
master_peak_3688	1	6588139	6588333	1.43946	NA	-0.18721	0.999991
master_peak_3691	1	6590811	6590997	-0.126447	NA	-0.801805	0.999991
master_peak_3692	1	6591865	6591969	0.260968	NA	-0.210939	0.999991
master_peak_3696	1	6595552	6595753	-0.255733	NA	-0.152011	0.999991
master_peak_3697	1	6600468	6600555	0.420381	NA	0.465605	0.999991
master_peak_3699	1	6602504	6602560	-0.0942383	NA	0.484229	0.999991
master_peak_3701	1	6607370	6607476	1.66619	NA	-0.57682	0.999991
master_peak_3702	1	6611249	6611604	1.25226	0.227907	0.249384	0.999991
master_peak_3705	1	6617890	6618207	2.0072	0.021165	-0.579992	0.999991
master_peak_3708	1	6623242	6623436	0.139896	NA	-0.987751	0.999991
master_peak_3717	1	6633345	6633420	1.60434	NA	0.0137301	0.999991
master_peak_3719	1	6640557	6640685	1.01433	NA	-1.29634	0.999991
master_peak_3730	1	6656440	6656517	4.49139	NA	-1.59341	0.999991
master_peak_3733	1	6666084	6666345	2.27451	0.0107962	-0.0845099	0.999991
master_peak_3734	1	6674486	6674540	1.33257	NA	0.114809	0.999991
master_peak_3735	1	6679290	6679365	-0.301492	NA	1.72751	0.999991
master_peak_3737	1	6681271	6681377	1.51599	NA	-1.11714	0.999991
master_peak_3738	1	6686168	6686276	0.064869	NA	-1.71842	0.999991
master_peak_3747	1	6711154	6711238	-0.493646	NA	0.615126	0.999991
master_peak_3749	1	6715833	6715988	-0.929138	NA	1.14916	0.999991
master_peak_3751	1	6717931	6717990	0.18651	NA	-0.858037	0.999991
master_peak_3756	1	6724409	6724461	1.80873	NA	-1.54072	0.999991
master_peak_3758	1	6727000	6727033	0.0366194	NA	1.71333	0.999991
master_peak_3765	1	6747845	6747884	2.314	NA	-0.653482	0.999991
master_peak_3767	1	6748490	6748576	0.5115	NA	0.525466	0.999991
master_peak_3768	1	6756251	6756329	-1.47088	NA	0.818002	0.999991
master_peak_3769	1	6757063	6757244	0.31243	NA	0.99944	0.999991
master_peak_3770	1	6758489	6758554	0.141671	NA	0.412383	0.999991
master_peak_3771	1	6761872	6761976	0.985749	NA	0.845355	0.999991
master_peak_3772	1	6762910	6763047	0.118929	NA	-0.623376	0.999991
master_peak_3773	1	6764114	6764284	-0.034969	NA	0.311885	0.999991
master_peak_3775	1	6764504	6764587	-0.837725	NA	-0.78793	0.999991
master_peak_3779	1	6776971	6777047	-0.688803	NA	1.00326	0.999991
master_peak_3784	1	6789757	6789897	0.179591	NA	1.67525	0.999991
master_peak_3790	1	6803378	6803685	2.95526	0.00134459	0.453779	0.999991
master_peak_3794	1	6815468	6815955	0.840089	0.638186	-0.485234	0.999991
master_peak_3798	1	6833936	6834164	-0.211939	0.874947	-0.498385	0.999991
master_peak_3799	1	6834343	6834430	-0.585846	NA	0.746984	0.999991
master_peak_3801	1	6839846	6839941	-0.878676	NA	0.306841	0.999991
master_peak_3803	1	6843042	6843115	1.52226	NA	-1.742	0.999991
master_peak_3805	1	6844096	6844184	0.380266	NA	0.640499	0.999991
master_peak_3809	1	6858931	6859290	-0.133249	0.931914	-1.24857	0.999991
master_peak_3811	1	6862788	6862988	-2.10112	0.116109	0.46235	0.999991
master_peak_3815	1	6873710	6873789	1.31156	NA	-0.800492	0.999991
master_peak_3816	1	6876429	6876528	0.261778	NA	0.290178	0.999991
master_peak_3817	1	6879686	6879781	-3.23247	NA	2.19234	0.999991
master_peak_3823	1	6886763	6886919	0.672148	0.764784	0.350492	0.999991
master_peak_3824	1	6887238	6887388	-0.975548	0.393082	-0.621492	0.999991
master_peak_3830	1	6900214	6900361	0.0409259	0.985607	-0.277391	0.999991
master_peak_3836	1	6905584	6905761	0.853798	NA	-0.458981	0.999991
master_peak_3837	1	6907773	6907844	0.412365	NA	0.902328	0.999991
master_peak_3839	1	6911740	6912014	-0.323727	0.910079	-0.249527	0.999991
master_peak_3840	1	6915773	6915908	1.17369	NA	-1.31079	0.999991
master_peak_3841	1	6915942	6916109	1.30689	NA	1.44195	0.999991
master_peak_3842	1	6920159	6920293	0.695536	NA	1.25592	0.999991
master_peak_3843	1	6920805	6920867	0.998756	NA	-0.23338	0.999991
master_peak_3844	1	6922208	6922286	0.800048	NA	-0.45377	0.999991
master_peak_3849	1	6925028	6925141	-1.976	NA	-0.133233	0.999991
master_peak_3850	1	6929969	6930336	-0.48869	0.768456	0.753395	0.999991
master_peak_3851	1	6934601	6934807	1.33109	NA	-0.531586	0.999991
master_peak_3852	1	6934918	6935110	0.422413	0.876969	0.00515475	0.999991
master_peak_3855	1	6940531	6940590	1.56264	NA	-0.679713	0.999991
master_peak_3856	1	6940631	6940936	-0.38955	0.812758	-0.462903	0.999991
master_peak_3861	1	6951074	6951231	0.629596	NA	0.106466	0.999991
master_peak_3864	1	6953608	6953680	1.03951	NA	-1.4644	0.999991
master_peak_3865	1	6956658	6956745	-0.0998391	NA	-0.620762	0.999991
master_peak_3866	1	6956795	6957108	0.914511	0.525701	-0.482419	0.999991
master_peak_3868	1	6958784	6958826	0.668507	NA	-1.82657	0.999991
master_peak_3871	1	6964343	6964410	3.47	NA	-0.908712	0.999991
master_peak_3875	1	6970464	6970865	0.0518881	0.975432	-0.522316	0.999991
master_peak_3877	1	6976143	6976207	-1.55664	NA	-0.120919	0.999991
master_peak_3878	1	6976407	6976719	-1.0934	0.0156467	-0.13497	0.999991
master_peak_3879	1	6982412	6982513	0.501979	NA	-0.706377	0.999991
master_peak_3880	1	6984846	6984912	1.96738	NA	0.622895	0.999991
master_peak_3883	1	6989488	6989758	-0.520983	0.783798	0.377798	0.999991
master_peak_3884	1	6989893	6990094	-1.09787	0.0839692	0.301168	0.999991
master_peak_3887	1	6991368	6991542	-0.716839	0.381952	-0.149425	0.999991
master_peak_3888	1	6992280	6992370	-0.40086	0.889744	-0.551398	0.999991
master_peak_3889	1	6995788	6995983	0.976519	0.38238	-0.326973	0.999991
master_peak_3890	1	6996535	6996721	0.415926	0.878049	-0.296996	0.999991
master_peak_3891	1	7000982	7001149	-0.868339	NA	-0.390037	0.999991
master_peak_3892	1	7004032	7004345	0.234899	0.867897	-0.341859	0.999991
master_peak_3893	1	7005837	7006310	-0.326562	0.810588	-0.211671	0.999991
master_peak_3898	1	7009773	7009835	0.487464	NA	-1.03709	0.999991
master_peak_3902	1	7014851	7014955	0.828228	NA	-0.388084	0.999991
master_peak_3904	1	7018318	7018415	-0.393076	NA	-0.515518	0.999991
master_peak_3910	1	7031751	7031786	0.899794	NA	0.949651	0.999991
master_peak_3911	1	7034211	7034476	-2.49288	0.0198881	0.536382	0.999991
master_peak_3913	1	7037574	7037848	0.214076	0.940542	-0.216681	0.999991
master_peak_3914	1	7038605	7038669	2.01978	NA	-0.375496	0.999991
master_peak_3916	1	7045080	7045318	-0.712186	NA	1.0494	0.999991
master_peak_3917	1	7047296	7047433	2.63456	NA	1.23791	0.999991
master_peak_3919	1	7048010	7048132	-0.52132	NA	0.153593	0.999991
master_peak_3922	1	7051953	7052047	0.434816	NA	0.855343	0.999991
master_peak_3926	1	7054516	7054649	4.49807	NA	-1.18758	0.999991
master_peak_3927	1	7054692	7054742	-0.877819	NA	-0.440074	0.999991
master_peak_3937	1	7067371	7067593	0.701866	NA	0.161031	0.999991
master_peak_3939	1	7068296	7068412	-1.6002	NA	-0.934244	0.999991
master_peak_3944	1	7080015	7080457	0.444682	0.896523	-0.217039	0.999991
master_peak_3946	1	7080725	7080908	-0.352379	0.84548	-0.324895	0.999991
master_peak_3948	1	7089575	7089748	0.198128	NA	-0.668806	0.999991
master_peak_3952	1	7093472	7093634	-1.12456	NA	-0.186436	0.999991
master_peak_3954	1	7095545	7095811	-2.47019	0.000354225	-1.11364	0.999991
master_peak_3955	1	7098507	7098733	-0.232086	NA	-0.0354145	0.999991
master_peak_3958	1	7101094	7101154	1.07881	NA	-0.114383	0.999991
master_peak_3961	1	7106112	7106454	1.65247	0.0112242	0.789289	0.999991
master_peak_3962	1	7108664	7108801	-0.661202	NA	-1.40796	0.999991
master_peak_3968	1	7121060	7121106	1.44146	NA	0.0592677	0.999991
master_peak_3969	1	7121782	7121928	0.666516	NA	-1.25973	0.999991
master_peak_3970	1	7121978	7122050	0.528958	NA	-0.966291	0.999991
master_peak_3972	1	7125422	7125507	0.78807	NA	0.189533	0.999991
master_peak_3975	1	7129171	7129392	-1.19215	0.216401	-0.873538	0.999991
master_peak_3979	1	7136658	7136865	-0.0181973	0.994652	-0.564053	0.999991
master_peak_3980	1	7142090	7142427	1.16	0.321053	-0.404827	0.999991
master_peak_3982	1	7146302	7146453	0.469516	NA	-0.145179	0.999991
master_peak_3983	1	7150162	7150214	-1.33584	NA	2.2326	0.999991
master_peak_3984	1	7150865	7151059	-0.705633	0.589133	-0.101823	0.999991
master_peak_3986	1	7152429	7152634	0.354542	NA	-0.436217	0.999991
master_peak_3987	1	7152689	7152786	1.95593	NA	0.172927	0.999991
master_peak_3988	1	7153185	7153231	0.504461	NA	-0.39599	0.999991
master_peak_3989	1	7157649	7157807	0.776445	NA	-0.816767	0.999991
master_peak_3990	1	7158651	7158927	0.911889	0.556406	-0.146487	0.999991
master_peak_3991	1	7159241	7159348	-0.85576	NA	-0.054911	0.999991
master_peak_3992	1	7159617	7159708	-0.116823	NA	0.553507	0.999991
master_peak_3993	1	7159787	7159837	-0.39434	NA	0.426099	0.999991
master_peak_3994	1	7160118	7160416	-0.434255	0.800257	-0.882236	0.999991
master_peak_4005	1	7169102	7169260	0.361548	NA	-0.0958184	0.999991
master_peak_4008	1	7178381	7178521	1.15593	NA	0.0456666	0.999991
master_peak_4009	1	7180244	7180334	-1.09304	NA	-1.27542	0.999991
master_peak_4012	1	7188264	7188350	1.88433	NA	-0.0579523	0.999991
master_peak_4015	1	7193748	7193839	0.216566	NA	-1.08196	0.999991
master_peak_4018	1	7201644	7201778	0.775928	NA	-2.86239	0.999991
master_peak_4021	1	7209635	7209869	0.00509701	0.997829	0.187274	0.999991
master_peak_4022	1	7210030	7210261	-0.527261	0.349029	-0.12213	0.999991
master_peak_4030	1	7254621	7254683	2.98833	NA	0.53268	0.999991
master_peak_4032	1	7256529	7256672	2.14461	NA	0.337979	0.999991
master_peak_4039	1	7292734	7292799	-1.22488	NA	1.50591	0.999991
master_peak_4042	1	7339616	7339790	-2.94014	0.0327255	-1.37554	0.999991
master_peak_4044	1	7344453	7344540	-0.0967947	NA	-0.441648	0.999991
master_peak_4046	1	7346606	7346770	0.582858	0.855037	0.156833	0.999991
master_peak_4049	1	7348703	7348936	-0.253317	0.84779	-0.223978	0.999991
master_peak_4050	1	7350105	7350195	-1.37147	NA	-0.145089	0.999991
master_peak_4056	1	7360090	7360167	0.69307	NA	-1.70615	0.999991
master_peak_4059	1	7363372	7363462	1.31771	NA	-0.472023	0.999991
master_peak_4060	1	7365331	7365416	-1.25584	NA	0.979905	0.999991
master_peak_4062	1	7367301	7367474	1.14295	NA	-0.575105	0.999991
master_peak_4065	1	7369795	7369862	0.199523	NA	-1.02727	0.999991
master_peak_4066	1	7371001	7371042	-1.04208	NA	0.795937	0.999991
master_peak_4071	1	7380108	7380243	1.63079	NA	0.103909	0.999991
master_peak_4080	1	7390586	7390781	0.487957	NA	0.660492	0.999991
master_peak_4084	1	7396930	7396982	-0.74988	NA	0.708289	0.999991
master_peak_4088	1	7410031	7410123	4.48496	NA	-0.831878	0.999991
master_peak_4089	1	7410732	7410774	-0.0282352	NA	-0.637959	0.999991
master_peak_4093	1	7416957	7417116	-0.928407	NA	-0.532212	0.999991
master_peak_4094	1	7417159	7417338	0.16479	NA	0.119073	0.999991
master_peak_4099	1	7425940	7426160	1.21532	NA	-0.0773372	0.999991
master_peak_4101	1	7429282	7429523	0.840942	0.564299	0.0720056	0.999991
master_peak_4105	1	7437133	7437223	-0.0612997	NA	0.594906	0.999991
master_peak_4108	1	7439259	7439416	-0.254762	NA	0.568377	0.999991
master_peak_4111	1	7444488	7444669	-0.768947	NA	1.24698	0.999991
master_peak_4114	1	7450360	7450491	1.05622	NA	-0.38822	0.999991
master_peak_4117	1	7454563	7454640	0.797968	0.640548	-0.421236	0.999991
master_peak_4118	1	7456172	7456442	-0.173153	0.919091	-0.318966	0.999991
master_peak_4121	1	7457325	7457563	-0.720468	0.150395	-0.268088	0.999991
master_peak_4125	1	7473314	7473368	0.976221	NA	-0.578297	0.999991
master_peak_4127	1	7476251	7476459	2.1363	NA	-1.76346	0.999991
master_peak_4128	1	7478825	7478980	0.880302	NA	0.0957459	0.999991
master_peak_4139	1	7513673	7513770	1.11562	NA	-2.63083	0.999991
master_peak_4141	1	7517695	7517979	-0.945559	0.489699	-1.03047	0.999991
master_peak_4142	1	7518514	7518661	0.451028	NA	-0.228059	0.999991
master_peak_4144	1	7521012	7521056	0.397906	NA	0.099445	0.999991
master_peak_4146	1	7522557	7522609	-0.300659	NA	0.376567	0.999991
master_peak_4147	1	7523365	7523432	0.00159897	NA	-0.372042	0.999991
master_peak_4148	1	7525740	7525857	1.46582	NA	-0.890196	0.999991
master_peak_4150	1	7527852	7528013	-0.237961	0.891331	0.352415	0.999991
master_peak_4151	1	7531419	7531614	-0.398382	NA	1.16914	0.999991
master_peak_4153	1	7534881	7535065	0.534322	NA	0.79571	0.999991
master_peak_4155	1	7537711	7537801	1.9222	NA	-1.39228	0.999991
master_peak_4157	1	7539548	7539615	-0.025867	NA	0.358997	0.999991
master_peak_4164	1	7549344	7549409	2.09697	NA	-2.28652	0.999991
master_peak_4166	1	7551295	7551367	1.1575	NA	-0.220875	0.999991
master_peak_4167	1	7551406	7551508	0.954865	NA	-0.286502	0.999991
master_peak_4169	1	7557045	7557141	0.683892	NA	-0.241567	0.999991
master_peak_4172	1	7562908	7563046	0.892317	NA	-0.311584	0.999991
master_peak_4179	1	7570965	7571040	0.88259	NA	-0.172554	0.999991
master_peak_4180	1	7573300	7573371	-0.372922	NA	0.948706	0.999991
master_peak_4182	1	7577721	7577778	2.27442	NA	-0.465922	0.999991
master_peak_4183	1	7579973	7580169	0.46297	NA	0.823109	0.999991
master_peak_4184	1	7582963	7583109	0.271583	NA	1.66829	0.999991
master_peak_4186	1	7588221	7588304	2.71088	NA	0.0683027	0.999991
master_peak_4187	1	7593791	7593864	1.93216	NA	-0.905717	0.999991
master_peak_4189	1	7595983	7596110	-0.0697967	NA	0.736849	0.999991
master_peak_4199	1	7614779	7614845	1.10802	NA	-1.87134	0.999991
master_peak_4200	1	7618533	7618667	0.888274	NA	0.163006	0.999991
master_peak_4203	1	7622557	7622589	1.68347	NA	-1.79062	0.999991
master_peak_4210	1	7628440	7628620	0.201803	NA	-0.0926265	0.999991
master_peak_4211	1	7630774	7630817	0.941683	NA	-0.873234	0.999991
master_peak_4212	1	7630870	7630975	0.105794	NA	0.00147991	0.999991
master_peak_4213	1	7632672	7632761	0.211622	NA	-0.989548	0.999991
master_peak_4216	1	7641675	7641751	1.04873	NA	-0.594717	0.999991
master_peak_4223	1	7654896	7655052	1.51208	NA	-0.162273	0.999991
master_peak_4228	1	7670586	7670644	3.2408	NA	-2.17478	0.999991
master_peak_4229	1	7672083	7672172	3.51617	NA	0.310983	0.999991
master_peak_4230	1	7672314	7672461	1.29301	NA	-0.349651	0.999991
master_peak_4231	1	7674691	7674824	2.34188	NA	-0.108108	0.999991
master_peak_4234	1	7683126	7683305	-0.163028	NA	-1.35754	0.999991
master_peak_4238	1	7699668	7699717	1.91381	NA	-0.621276	0.999991
master_peak_4243	1	7703363	7703430	-0.639007	NA	1.26728	0.999991
master_peak_4245	1	7704904	7705068	0.0176955	0.994608	-0.957312	0.999991
master_peak_4250	1	7713889	7714095	-0.767472	NA	-0.600671	0.999991
master_peak_4251	1	7716943	7717024	-0.746431	NA	0.807629	0.999991
master_peak_4257	1	7719822	7719939	-1.41651	NA	0.80442	0.999991
master_peak_4267	1	7734445	7734583	1.61094	NA	0.597468	0.999991
master_peak_4268	1	7734638	7734865	0.887525	NA	0.0049829	0.999991
master_peak_4275	1	7744241	7744293	-1.04951	NA	0.626104	0.999991
master_peak_4276	1	7744547	7744727	-1.42864	0.15526	-0.0527817	0.999991
master_peak_4278	1	7753178	7753313	0.260222	NA	-0.216536	0.999991
master_peak_4285	1	7765123	7765178	-1.06787	NA	1.04635	0.999991
master_peak_4292	1	7782931	7783049	0.317225	NA	0.772635	0.999991
master_peak_4295	1	7783883	7784136	-1.96803	0.0994142	0.0497227	0.999991
master_peak_4296	1	7786947	7787036	-0.997021	NA	-0.829457	0.999991
master_peak_4297	1	7787965	7788071	0.127738	NA	0.239773	0.999991
master_peak_4300	1	7791998	7792056	0.385772	NA	-0.798826	0.999991
master_peak_4301	1	7794000	7794197	0.489261	NA	-0.829298	0.999991
master_peak_4305	1	7797820	7797944	1.86754	NA	-0.38726	0.999991
master_peak_4312	1	7804892	7805040	0.730507	0.648375	-0.487191	0.999991
master_peak_4313	1	7807094	7807238	-1.03842	NA	0.406987	0.999991
master_peak_4314	1	7810613	7810714	1.32203	NA	-0.0880223	0.999991
master_peak_4316	1	7816327	7816383	2.01251	NA	0.265187	0.999991
master_peak_4318	1	7818968	7819063	1.4441	NA	-0.885805	0.999991
master_peak_4319	1	7819141	7819301	-0.368116	NA	-1.59565	0.999991
master_peak_4320	1	7824381	7824574	-0.0819838	0.935112	-0.16376	0.999991
master_peak_4321	1	7824659	7824957	0.0864061	0.955361	-0.271192	0.999991
master_peak_4322	1	7825043	7825647	-0.120067	0.90116	-0.404778	0.999991
master_peak_4327	1	7837088	7837259	-0.795483	0.225961	0.471187	0.999991
master_peak_4328	1	7837374	7837437	1.88666	NA	-0.763	0.999991
master_peak_4329	1	7837534	7837624	-1.91906	NA	1.84614	0.999991
master_peak_4330	1	7837923	7838084	-0.797432	0.703483	-0.271082	0.999991
master_peak_4331	1	7840065	7840211	-0.117712	0.950731	-0.318192	0.999991
master_peak_4332	1	7841088	7841233	-1.76829	NA	0.847382	0.999991
master_peak_4333	1	7843020	7843128	-0.338557	NA	0.959519	0.999991
master_peak_4335	1	7849367	7849664	2.97993	1.62795e-05	0.130491	0.999991
master_peak_4336	1	7849913	7850061	-0.242491	0.877901	-0.258937	0.999991
master_peak_4337	1	7850214	7850443	0.49652	0.740952	-0.43272	0.999991
master_peak_4340	1	7855158	7855361	0.75316	0.739934	-1.41044	0.999991
master_peak_4342	1	7859398	7859471	-1.17603	NA	0.855096	0.999991
master_peak_4346	1	7868199	7868258	1.13454	NA	-0.727407	0.999991
master_peak_4352	1	7879930	7880080	1.36124	NA	-1.19994	0.999991
master_peak_4355	1	7882410	7882490	2.19663	NA	-1.09137	0.999991
master_peak_4356	1	7882631	7882738	-0.356391	0.870395	0.147119	0.999991
master_peak_4362	1	7914217	7914421	0.89551	NA	0.00734558	0.999991
master_peak_4364	1	7917930	7918287	0.210135	0.926111	-0.829834	0.999991
master_peak_4366	1	7919937	7920077	-0.0431263	NA	1.22643	0.999991
master_peak_4367	1	7922512	7922685	-0.885763	NA	0.761747	0.999991
master_peak_4368	1	7923738	7923841	0.203147	NA	0.327554	0.999991
master_peak_4369	1	7924065	7924246	-0.799342	NA	-0.229787	0.999991
master_peak_4376	1	7955677	7955919	1.14886	0.239385	0.477005	0.999991
master_peak_4378	1	7959141	7959516	-0.207555	0.907899	0.314917	0.999991
master_peak_4379	1	7959683	7959757	-0.132323	NA	0.377064	0.999991
master_peak_4380	1	7959897	7960004	0.0142044	NA	-0.0869269	0.999991
master_peak_4381	1	7962804	7962897	-0.846386	0.502	0.158407	0.999991
master_peak_4382	1	7967468	7967806	-0.614504	0.262679	-0.133612	0.999991
master_peak_4383	1	7968466	7968693	-0.645236	0.169891	0.0944487	0.999991
master_peak_4384	1	7969606	7969713	-1.39137	0.0592854	0.162612	0.999991
master_peak_4386	1	7971682	7971798	-0.906287	0.333162	0.313464	0.999991
master_peak_4387	1	7974764	7974840	1.47108	NA	0.0622798	0.999991
master_peak_4388	1	7975915	7976012	-2.0718	NA	0.317856	0.999991
master_peak_4389	1	7977206	7977389	-1.43852	0.0298083	-0.0792638	0.999991
master_peak_4391	1	7978583	7978646	-0.574531	NA	1.10814	0.999991
master_peak_4392	1	7978752	7979119	-0.72227	0.672826	0.313435	0.999991
master_peak_4395	1	7983991	7984089	0.506175	NA	0.137508	0.999991
master_peak_4396	1	7986059	7986121	0.980887	NA	-0.163802	0.999991
master_peak_4397	1	7987094	7987151	0.877802	NA	-0.930478	0.999991
master_peak_4398	1	7987613	7987651	0.381899	NA	-0.627956	0.999991
master_peak_4401	1	7989985	7990068	-1.51417	NA	1.11482	0.999991
master_peak_4402	1	7990643	7990757	0.250293	NA	-0.148404	0.999991
master_peak_4411	1	8009622	8010158	-0.633879	0.0948697	0.313202	0.999991
master_peak_4412	1	8010246	8010314	-1.65513	0.197187	1.07176	0.999991
master_peak_4415	1	8017710	8017820	-0.924982	0.585354	0.356649	0.999991
master_peak_4417	1	8020442	8020891	-0.641644	0.401181	0.473738	0.999991
master_peak_4419	1	8024621	8024740	1.42396	NA	-0.265283	0.999991
master_peak_4424	1	8046482	8046558	-2.18863	NA	1.3796	0.999991
master_peak_4440	1	8064773	8064896	1.101	NA	-0.867858	0.999991
master_peak_4442	1	8065222	8065426	1.36137	NA	-0.356394	0.999991
master_peak_4443	1	8067474	8067559	0.455367	NA	-1.4384	0.999991
master_peak_4447	1	8081908	8082170	-0.493951	0.712138	-0.646339	0.999991
master_peak_4449	1	8082492	8082657	-0.160009	NA	-0.0594527	0.999991
master_peak_4455	1	8091982	8092032	2.23895	NA	-2.2011	0.999991
master_peak_4456	1	8093408	8093476	-0.130706	NA	0.672709	0.999991
master_peak_4457	1	8093613	8093726	0.628289	NA	-0.262583	0.999991
master_peak_4463	1	8102563	8102687	0.142107	NA	0.326768	0.999991
master_peak_4466	1	8107521	8107705	0.646082	NA	0.311337	0.999991
master_peak_4467	1	8112100	8112342	3.16423	NA	-1.42652	0.999991
master_peak_4470	1	8116614	8116888	-0.256788	0.914438	-1.83352	0.999991
master_peak_4476	1	8126610	8126949	-0.0660452	0.980005	-0.552818	0.999991
master_peak_4482	1	8136656	8136730	0.0663805	NA	0.121658	0.999991
master_peak_4485	1	8140276	8140373	0.72312	NA	1.08681	0.999991
master_peak_4486	1	8144825	8144976	0.996851	NA	-0.975716	0.999991
master_peak_4494	1	8163845	8163982	-0.00586007	NA	-1.22613	0.999991
master_peak_4497	1	8168480	8168544	-0.628328	NA	0.270974	0.999991
master_peak_4500	1	8174628	8174673	-0.165854	NA	-0.269477	0.999991
master_peak_4502	1	8180529	8180602	1.97178	NA	-0.944332	0.999991
master_peak_4503	1	8180719	8180825	-0.56058	NA	0.742715	0.999991
master_peak_4512	1	8204857	8204916	2.15728	NA	-0.794876	0.999991
master_peak_4518	1	8212041	8212136	0.530638	NA	0.129548	0.999991
master_peak_4524	1	8217311	8217425	0.669065	NA	-0.799936	0.999991
master_peak_4526	1	8222965	8223157	-0.702246	NA	0.919173	0.999991
master_peak_4532	1	8232398	8232548	-0.0813503	0.976258	-0.982882	0.999991
master_peak_4533	1	8233015	8233068	0.418077	NA	0.00924791	0.999991
master_peak_4542	1	8250031	8250123	-0.738766	NA	-0.485729	0.999991
master_peak_4549	1	8269220	8269317	-0.343387	NA	0.131643	0.999991
master_peak_4557	1	8279064	8279401	0.961651	0.455509	0.0684598	0.999991
master_peak_4558	1	8282002	8282225	-0.298077	NA	-0.505668	0.999991
master_peak_4561	1	8287001	8287113	0.579313	NA	-0.29169	0.999991
master_peak_4562	1	8293617	8293649	-0.628606	NA	0.478436	0.999991
master_peak_4563	1	8293704	8294006	-0.260726	0.705985	-0.252543	0.999991
master_peak_4564	1	8296678	8296716	-0.367154	NA	-1.13319	0.999991
master_peak_4565	1	8299520	8299656	1.93904	NA	-0.940805	0.999991
master_peak_4566	1	8299823	8300017	1.93285	0.0418917	0.35549	0.999991
master_peak_4568	1	8302433	8302495	-1.56908	NA	1.95398	0.999991
master_peak_4571	1	8306247	8306372	-0.857603	NA	0.957553	0.999991
master_peak_4573	1	8311156	8311356	-1.02682	NA	0.769045	0.999991
master_peak_4576	1	8313252	8313477	0.439562	0.697968	-0.132611	0.999991
master_peak_4579	1	8316596	8317023	0.808142	0.333336	0.250241	0.999991
master_peak_4580	1	8320477	8320730	-0.503459	0.650163	-0.196847	0.999991
master_peak_4582	1	8321028	8321092	-1.22878	NA	0.317635	0.999991
master_peak_4583	1	8321240	8321414	-0.259304	0.907292	0.714551	0.999991
master_peak_4584	1	8327372	8327491	0.00624816	NA	0.923602	0.999991
master_peak_4585	1	8329498	8329549	-0.273167	NA	0.404975	0.999991
master_peak_4586	1	8333372	8333465	0.772287	NA	-0.507681	0.999991
master_peak_4587	1	8336819	8337364	-0.483041	0.667656	0.342132	0.999991
master_peak_4589	1	8344837	8345044	-1.06563	NA	0.123788	0.999991
master_peak_4597	1	8358590	8358784	-0.346131	NA	-0.220007	0.999991
master_peak_4599	1	8360555	8360737	1.48814	NA	-0.211937	0.999991
master_peak_4605	1	8371845	8372013	1.10617	NA	0.206547	0.999991
master_peak_4607	1	8383305	8383367	0.768316	NA	-0.988123	0.999991
master_peak_4610	1	8388636	8388687	4.46352	NA	-1.43545	0.999991
master_peak_4612	1	8390709	8390832	1.74604	NA	0.180307	0.999991
master_peak_4614	1	8394300	8394343	1.48458	NA	0.0830279	0.999991
master_peak_4616	1	8398410	8398485	0.549811	NA	-1.21287	0.999991
master_peak_4617	1	8401486	8401535	0.8007	NA	0.202023	0.999991
master_peak_4619	1	8404411	8404568	-0.76998	0.703257	0.284596	0.999991
master_peak_4620	1	8407107	8407182	1.83033	NA	-0.580564	0.999991
master_peak_4622	1	8412084	8412279	0.412448	0.479734	-0.332416	0.999991
master_peak_4623	1	8419171	8419379	-1.23685	NA	2.42722	0.999991
master_peak_4625	1	8420479	8420883	-1.15523	0.406157	0.640355	0.999991
master_peak_4626	1	8422865	8422953	-1.13783	NA	0.635986	0.999991
master_peak_4627	1	8427067	8427540	-3.09779	1.80921e-09	0.141826	0.999991
master_peak_4628	1	8430900	8431180	-4.05203	0.0819981	0.712131	0.999991
master_peak_4629	1	8432395	8432523	-0.899973	0.543691	0.00754197	0.999991
master_peak_4632	1	8437464	8437567	-0.654137	NA	0.576348	0.999991
master_peak_4633	1	8439043	8439371	-0.039393	0.981602	-0.0674479	0.999991
master_peak_4634	1	8446363	8446402	0.326254	NA	0.197305	0.999991
master_peak_4635	1	8446746	8446833	-1.42134	NA	0.297146	0.999991
master_peak_4636	1	8447452	8447536	0.835608	NA	-0.547256	0.999991
master_peak_4637	1	8449907	8449946	-0.937717	NA	-0.409952	0.999991
master_peak_4638	1	8450004	8450285	-0.729236	0.44906	0.526328	0.999991
master_peak_4640	1	8452430	8452529	1.74981	NA	0.00111139	0.999991
master_peak_4642	1	8460720	8460796	0.225805	NA	0.0284969	0.999991
master_peak_4644	1	8460997	8461106	-0.660061	NA	0.863152	0.999991
master_peak_4645	1	8461316	8461555	-0.329578	NA	-0.121704	0.999991
master_peak_4647	1	8468913	8469151	-0.874433	0.0583296	-0.118522	0.999991
master_peak_4649	1	8469918	8469997	0.661499	NA	-1.97767	0.999991
master_peak_4650	1	8470794	8470877	1.92052	NA	-0.903383	0.999991
master_peak_4651	1	8472102	8472246	-1.1086	0.537323	-0.593018	0.999991
master_peak_4656	1	8479953	8480045	-2.0339	NA	1.42747	0.999991
master_peak_4658	1	8485661	8485855	-0.36074	NA	0.710129	0.999991
master_peak_4659	1	8488424	8488570	0.586244	NA	-0.724208	0.999991
master_peak_4663	1	8493234	8493309	0.196665	NA	0.190204	0.999991
master_peak_4665	1	8493567	8493702	0.84151	NA	-0.6669	0.999991
master_peak_4666	1	8498103	8498318	-1.9519	0.0124488	-0.137582	0.999991
master_peak_4667	1	8499309	8499412	-0.195554	NA	-1.17554	0.999991
master_peak_4672	1	8503846	8503903	0.871337	NA	-1.27338	0.999991
master_peak_4675	1	8511354	8511502	0.549294	0.815347	-0.417255	0.999991
master_peak_4676	1	8511693	8511985	0.3971	0.621209	0.0908866	0.999991
master_peak_4677	1	8514059	8514156	-1.186	0.468179	-0.421645	0.999991
master_peak_4678	1	8514893	8514977	-0.0601183	0.981263	-0.724097	0.999991
master_peak_4680	1	8521679	8521727	1.2332	NA	-0.296439	0.999991
master_peak_4685	1	8525384	8525465	0.515901	NA	-0.0826289	0.999991
master_peak_4686	1	8530337	8530636	-1.31138	0.464669	1.14545	0.999991
master_peak_4687	1	8532326	8532430	1.60933	NA	-0.793842	0.999991
master_peak_4692	1	8543115	8543225	-0.896012	NA	-0.681504	0.999991
master_peak_4693	1	8543581	8543637	1.25763	NA	0.822099	0.999991
master_peak_4694	1	8543840	8543942	-0.690097	NA	1.14876	0.999991
master_peak_4697	1	8547033	8547139	-0.429239	NA	0.566837	0.999991
master_peak_4698	1	8550515	8550696	0.0997797	0.949132	-1.03542	0.999991
master_peak_4701	1	8562046	8562237	-1.88776	NA	1.08567	0.999991
master_peak_4702	1	8565773	8565806	0.621285	NA	0.0389699	0.999991
master_peak_4703	1	8570803	8570860	0.791454	NA	1.18908	0.999991
master_peak_4705	1	8574634	8574774	-0.739763	NA	0.0217555	0.999991
master_peak_4706	1	8577753	8577930	-0.463765	NA	0.11039	0.999991
master_peak_4707	1	8577967	8578097	-1.72752	NA	1.39366	0.999991
master_peak_4710	1	8581870	8581910	0.692139	NA	-0.328858	0.999991
master_peak_4711	1	8588869	8589055	0.534986	NA	-0.697281	0.999991
master_peak_4713	1	8592232	8592354	-0.595254	NA	0.284293	0.999991
master_peak_4715	1	8596145	8596207	1.22734	NA	-0.760433	0.999991
master_peak_4716	1	8596439	8596508	1.0349	NA	-2.17098	0.999991
master_peak_4718	1	8598642	8598893	-0.274184	0.819158	-0.6036	0.999991
master_peak_4720	1	8599938	8600194	0.122705	0.956777	-0.299058	0.999991
master_peak_4721	1	8602379	8602519	-0.00124413	0.999456	-0.619736	0.999991
master_peak_4724	1	8607995	8608196	-3.45637	9.99186e-08	0.0240241	0.999991
master_peak_4726	1	8610380	8610479	-0.602313	0.74938	-0.138003	0.999991
master_peak_4728	1	8611700	8611882	-1.12406	0.525536	-0.0177727	0.999991
master_peak_4729	1	8613092	8613180	-1.47194	NA	1.37945	0.999991
master_peak_4736	1	8625414	8625622	-0.495119	NA	1.63373	0.999991
master_peak_4742	1	8631757	8631963	-0.200966	NA	0.736799	0.999991
master_peak_4754	1	8653316	8653479	-0.194102	NA	0.899411	0.999991
master_peak_4756	1	8656840	8656890	1.23461	NA	1.52661	0.999991
master_peak_4757	1	8656938	8657008	0.473509	NA	-0.0199859	0.999991
master_peak_4758	1	8659513	8659582	1.21945	NA	-1.08657	0.999991
master_peak_4765	1	8667727	8667877	1.21981	NA	0.40807	0.999991
master_peak_4766	1	8671293	8671362	0.73352	NA	0.632533	0.999991
master_peak_4767	1	8675476	8675841	-0.794546	0.677302	0.0859438	0.999991
master_peak_4769	1	8682028	8682116	0.109752	NA	-0.997588	0.999991
master_peak_4770	1	8682165	8682274	-1.02108	NA	0.0283163	0.999991
master_peak_4774	1	8688705	8688894	0.387418	NA	-0.453842	0.999991
master_peak_4777	1	8695218	8695321	-1.72322	NA	-3.24523	0.999991
master_peak_4781	1	8707818	8708012	1.42831	NA	-0.360427	0.999991
master_peak_4784	1	8711311	8711519	-0.0384459	NA	0.626334	0.999991
master_peak_4788	1	8718505	8718594	0.890324	NA	-0.0760418	0.999991
master_peak_4793	1	8740110	8740200	3.00119	NA	-0.246546	0.999991
master_peak_4794	1	8740326	8740381	2.21774	NA	-1.66727	0.999991
master_peak_4802	1	8751932	8752007	-0.465453	NA	0.429129	0.999991
master_peak_4804	1	8756460	8756554	-1.60409	NA	2.58963	0.999991
master_peak_4805	1	8757023	8757127	-0.0348389	NA	0.202886	0.999991
master_peak_4807	1	8757478	8757530	0.401538	NA	0.760622	0.999991
master_peak_4809	1	8761048	8761102	0.672684	NA	-1.86828	0.999991
master_peak_4810	1	8764210	8764345	0.184158	NA	-0.222236	0.999991
master_peak_4813	1	8769600	8769805	0.960535	0.534234	0.0373166	0.999991
master_peak_4814	1	8773667	8773896	-0.802596	0.729726	0.796313	0.999991
master_peak_4815	1	8773947	8774017	1.05492	NA	0.245084	0.999991
master_peak_4816	1	8776253	8776341	-0.493744	NA	0.752746	0.999991
master_peak_4817	1	8776802	8776876	2.17271	NA	0.0519202	0.999991
master_peak_4820	1	8780281	8780372	4.28958	NA	-0.471897	0.999991
master_peak_4822	1	8782127	8782218	0.570329	NA	-0.225339	0.999991
master_peak_4823	1	8787867	8788161	1.38689	NA	0.51805	0.999991
master_peak_4824	1	8790177	8790238	1.18728	NA	-0.757983	0.999991
master_peak_4825	1	8791345	8791410	1.6495	NA	-1.66197	0.999991
master_peak_4826	1	8791448	8791585	1.53351	NA	-0.35713	0.999991
master_peak_4832	1	8798431	8798502	1.39937	NA	-0.280823	0.999991
master_peak_4833	1	8801603	8802148	-0.137963	0.895296	-0.28143	0.999991
master_peak_4834	1	8805302	8805390	1.60404	NA	-0.578111	0.999991
master_peak_4843	1	8830015	8830232	0.739644	0.575184	-0.0460915	0.999991
master_peak_4844	1	8831231	8831383	1.36672	NA	-0.465216	0.999991
master_peak_4846	1	8839184	8839441	-0.766761	0.652706	-0.238985	0.999991
master_peak_4847	1	8841850	8842012	1.28583	0.284794	0.91611	0.999991
master_peak_4849	1	8842615	8842686	-0.895971	NA	1.66387	0.999991
master_peak_4850	1	8842927	8843111	0.0238492	0.990584	-0.449312	0.999991
master_peak_4851	1	8843264	8843356	0.0337236	NA	1.104	0.999991
master_peak_4852	1	8843548	8843602	-0.0704606	NA	0.917061	0.999991
master_peak_4856	1	8850002	8850167	-2.66262	NA	1.21103	0.999991
master_peak_4863	1	8864879	8864922	2.40073	NA	1.66229	0.999991
master_peak_4864	1	8864997	8865051	2.30254	NA	-1.81013	0.999991
master_peak_4866	1	8866770	8866859	-1.47741	NA	1.65943	0.999991
master_peak_4868	1	8873007	8873380	0.358764	0.819776	-0.276124	0.999991
master_peak_4869	1	8873575	8873804	-0.0277657	NA	-0.410978	0.999991
master_peak_4871	1	8874399	8874464	0.151602	NA	-0.751194	0.999991
master_peak_4876	1	8880328	8880378	4.68259	NA	1.03392	0.999991
master_peak_4880	1	8883963	8884116	3.52605	NA	-0.270349	0.999991
master_peak_4884	1	8891409	8891700	-4.14143	1.22515e-06	0.224015	0.999991
master_peak_4888	1	8901642	8901722	2.32337	NA	-0.889527	0.999991
master_peak_4889	1	8904111	8904174	2.11006	NA	0.712554	0.999991
master_peak_4890	1	8908575	8908661	-3.29485	NA	5.36722	0.999991
master_peak_4893	1	8915756	8915813	3.90412	NA	-0.186167	0.999991
master_peak_4896	1	8919455	8919519	2.64021	NA	0.777235	0.999991
master_peak_4897	1	8920074	8920136	-2.20859	NA	4.12005	0.999991
master_peak_4908	1	8938690	8938822	-0.0506125	NA	-0.238834	0.999991
master_peak_4909	1	8938863	8938990	0.654315	NA	0.675033	0.999991
master_peak_4916	1	8962139	8962273	0.574375	NA	-0.381282	0.999991
master_peak_4917	1	8963504	8963602	1.26119	NA	-0.726693	0.999991
master_peak_4920	1	8967925	8968116	-0.0328046	0.983149	-0.237959	0.999991
master_peak_4921	1	8968553	8968685	-0.811025	0.632502	0.730673	0.999991
master_peak_4923	1	8973795	8973866	0.90529	NA	-0.492919	0.999991
master_peak_4928	1	8990132	8990253	0.674385	0.722081	-0.0304733	0.999991
master_peak_4929	1	8993746	8993899	1.6733	0.137144	-0.210414	0.999991
master_peak_4930	1	8995637	8995740	2.26167	NA	-2.28783	0.999991
master_peak_4935	1	9012603	9012849	1.73787	0.0979029	-0.179322	0.999991
master_peak_4941	1	9026717	9027015	0.860456	0.669539	-0.0367068	0.999991
master_peak_4943	1	9031161	9031257	1.37949	NA	-0.0974139	0.999991
master_peak_4946	1	9036738	9036806	0.924623	NA	-0.307718	0.999991
master_peak_4954	1	9053618	9053805	1.21978	NA	-1.39059	0.999991
master_peak_4957	1	9057032	9057194	0.326078	NA	-0.232592	0.999991
master_peak_4959	1	9061702	9061850	0.506968	NA	0.38825	0.999991
master_peak_4960	1	9062811	9062903	0.304629	NA	-1.14623	0.999991
master_peak_4962	1	9065224	9065283	-0.394848	NA	0.733265	0.999991
master_peak_4963	1	9065445	9065553	0.114574	NA	0.561535	0.999991
master_peak_4966	1	9069245	9069428	1.27255	NA	0.64229	0.999991
master_peak_4969	1	9076311	9076524	2.44051	0.00473433	-0.239668	0.999991
master_peak_4970	1	9076696	9076753	2.81183	NA	-0.762363	0.999991
master_peak_4971	1	9080322	9080391	-0.846293	NA	0.630018	0.999991
master_peak_4974	1	9084909	9084963	2.67834	NA	-0.861194	0.999991
master_peak_4975	1	9087775	9087834	1.3634	NA	-0.712649	0.999991
master_peak_4980	1	9111208	9111252	0.0484645	NA	0.58912	0.999991
master_peak_4981	1	9113735	9114040	0.447723	0.800058	-0.615834	0.999991
master_peak_4985	1	9122174	9122270	3.63451	NA	-1.08644	0.999991
master_peak_4986	1	9124544	9124656	0.287543	NA	-0.114989	0.999991
master_peak_4990	1	9136963	9137192	-1.4937	NA	0.0654184	0.999991
master_peak_4991	1	9139573	9139848	-1.12272	NA	-0.441547	0.999991
master_peak_4994	1	9142879	9142955	0.249857	NA	-0.310397	0.999991
master_peak_4998	1	9145061	9145169	4.05535	NA	-0.741855	0.999991
master_peak_4999	1	9146384	9146443	2.31115	NA	-0.935779	0.999991
master_peak_5000	1	9146535	9146583	0.88474	NA	0.222996	0.999991
master_peak_5004	1	9159670	9159743	0.243307	NA	1.5118	0.999991
master_peak_5005	1	9162373	9162420	1.37765	NA	-0.915242	0.999991
master_peak_5006	1	9162572	9162804	-0.0523107	0.982254	-0.229086	0.999991
master_peak_5009	1	9174315	9174525	-0.799113	0.0705136	-0.00291486	0.999991
master_peak_5010	1	9176143	9176514	-0.431518	0.643163	0.332145	0.999991
master_peak_5012	1	9189529	9189723	0.376601	NA	0.0256778	0.999991
master_peak_5014	1	9190981	9191047	1.00452	NA	0.130973	0.999991
master_peak_5016	1	9193231	9193342	0.294257	NA	-1.41882	0.999991
master_peak_5019	1	9200901	9201005	1.17415	NA	-0.191605	0.999991
master_peak_5021	1	9202694	9202864	-0.741546	0.543263	-0.634653	0.999991
master_peak_5025	1	9208323	9208476	-0.250445	NA	1.5799	0.999991
master_peak_5041	1	9235998	9236177	0.240193	NA	1.07793	0.999991
master_peak_5045	1	9244558	9244606	4.01723	NA	-0.530192	0.999991
master_peak_5047	1	9246383	9246445	0.583403	NA	-0.402264	0.999991
master_peak_5048	1	9247744	9247796	-1.36931	NA	0.854521	0.999991
master_peak_5051	1	9256319	9256418	-0.0837719	NA	-0.0795316	0.999991
master_peak_5052	1	9256743	9257122	0.866432	0.140423	0.37963	0.999991
master_peak_5053	1	9257573	9257639	-1.65082	NA	-2.63983	0.999991
master_peak_5054	1	9259456	9259557	0.564346	NA	-0.17899	0.999991
master_peak_5055	1	9262460	9262833	-0.771117	0.570225	-0.175198	0.999991
master_peak_5056	1	9266127	9266604	0.357687	0.803449	-0.342542	0.999991
master_peak_5057	1	9268454	9268487	0.992275	NA	0.234708	0.999991
master_peak_5060	1	9270318	9270499	-0.6124	0.762573	-0.814551	0.999991
master_peak_5061	1	9271611	9271702	0.932958	NA	0.44691	0.999991
master_peak_5066	1	9277316	9277396	1.34856	NA	-0.00854868	0.999991
master_peak_5072	1	9285111	9285273	-0.686545	NA	3.4525	0.999991
master_peak_5073	1	9286228	9286308	-0.887901	NA	-0.23844	0.999991
master_peak_5077	1	9316305	9316360	-0.0353842	NA	-0.470884	0.999991
master_peak_5078	1	9318795	9318854	1.30656	NA	-0.378236	0.999991
master_peak_5079	1	9319158	9319473	-0.684955	0.168246	-0.0725636	0.999991
master_peak_5082	1	9327136	9327253	1.40829	NA	-0.905457	0.999991
master_peak_5085	1	9334323	9334489	-0.34298	0.762801	-0.928982	0.999991
master_peak_5086	1	9339110	9339218	0.778041	NA	-1.42142	0.999991
master_peak_5087	1	9339259	9339426	1.22795	NA	0.310733	0.999991
master_peak_5088	1	9339542	9339628	0.578532	NA	0.199408	0.999991
master_peak_5090	1	9348118	9348200	1.1604	NA	-0.0510579	0.999991
master_peak_5091	1	9348286	9348598	0.4652	0.837071	-0.760265	0.999991
master_peak_5092	1	9350974	9351068	0.701802	NA	0.391241	0.999991
master_peak_5093	1	9357736	9357854	0.70208	NA	0.134229	0.999991
master_peak_5094	1	9360229	9360323	3.21534	NA	-1.70686	0.999991
master_peak_5097	1	9364364	9364547	-0.158836	0.933548	-0.202762	0.999991
master_peak_5099	1	9367097	9367138	0.291742	NA	1.72242	0.999991
master_peak_5101	1	9368998	9369124	-1.20223	NA	-0.245137	0.999991
master_peak_5102	1	9370284	9370334	1.17225	NA	-1.27017	0.999991
master_peak_5104	1	9372150	9372234	0.61802	NA	0.345523	0.999991
master_peak_5105	1	9373690	9373841	0.00295184	NA	-0.138042	0.999991
master_peak_5106	1	9375013	9375119	1.7621	NA	-0.388446	0.999991
master_peak_5108	1	9382381	9382534	-0.0916882	NA	0.99452	0.999991
master_peak_5109	1	9382617	9382667	-0.570348	NA	0.811348	0.999991
master_peak_5111	1	9383677	9383718	-0.611988	NA	0.808768	0.999991
master_peak_5113	1	9387274	9387383	1.80447	NA	0.911592	0.999991
master_peak_5114	1	9388642	9388720	0.04191	NA	0.239928	0.999991
master_peak_5115	1	9390410	9390482	-0.756683	NA	0.259786	0.999991
master_peak_5116	1	9393961	9394122	0.0300597	0.988604	0.116247	0.999991
master_peak_5117	1	9395817	9396082	0.71984	0.674186	-0.62361	0.999991
master_peak_5118	1	9398180	9398362	-0.960011	0.755793	0.396605	0.999991
master_peak_5120	1	9406966	9407139	-0.263938	NA	-0.244203	0.999991
master_peak_5122	1	9414163	9414463	-0.439676	NA	-0.125109	0.999991
master_peak_5123	1	9417188	9417386	-2.20731	0.102756	0.745538	0.999991
master_peak_5124	1	9422951	9423455	-1.62299	0.0575312	0.323514	0.999991
master_peak_5125	1	9423669	9423873	0.380925	NA	-0.990285	0.999991
master_peak_5128	1	9426564	9426705	-0.459476	NA	0.197236	0.999991
master_peak_5131	1	9431130	9431354	2.79952	0.0117672	1.10229	0.999991
master_peak_5132	1	9434320	9434520	-0.488946	NA	-0.440236	0.999991
master_peak_5133	1	9434733	9434897	-0.367703	NA	-0.284138	0.999991
master_peak_5135	1	9438558	9438657	-1.04641	NA	1.18914	0.999991
master_peak_5136	1	9439595	9439701	-0.225359	NA	1.64927	0.999991
master_peak_5139	1	9443015	9443099	0.36829	NA	0.0951055	0.999991
master_peak_5145	1	9449758	9449867	0.0564022	NA	-0.133152	0.999991
master_peak_5149	1	9457819	9458017	-0.00936822	0.9968	-0.630454	0.999991
master_peak_5153	1	9464913	9465020	0.108525	NA	-0.271736	0.999991
master_peak_5156	1	9476739	9476907	0.149291	NA	0.487796	0.999991
master_peak_5160	1	9482497	9482596	0.375408	NA	0.997997	0.999991
master_peak_5164	1	9486560	9486654	1.04817	NA	-0.581561	0.999991
master_peak_5170	1	9498832	9498978	0.848433	NA	1.59335	0.999991
master_peak_5174	1	9508541	9508750	0.833274	NA	0.304377	0.999991
master_peak_5176	1	9512115	9512253	1.92894	NA	-0.0123382	0.999991
master_peak_5178	1	9512416	9512515	0.431835	NA	-0.226711	0.999991
master_peak_5181	1	9515473	9515639	1.58202	NA	0.225309	0.999991
[truncated: 236,485+ more rows]
